# Supplementary material for: Pooled Genomic Screens Identify Anti-apoptotic Genes as Targetable Mediators of Chemotherapy Resistance in Ovarian Cancer
Source: Oxford University Press journal article supplement (doi:10.1158/1541-7786.mcr-18-1243), 2019-08-28
Supplement: 15417786mcr181243-sup-212398_3_supp_5704738_pw3r8y.xlsx [file 15417786mcr181243-sup-212398_3_supp_5704738_pw3r8y.xlsx]

## Sheet: Kuramochi
Construct Barcode	Construct IDs	Gene symbol	Kuramochi Rep A ETP	Kuramochi Rep B ETP	Kuramochi Rep A DMSO	Kuramochi Rep B DMSO	Kuramochi Rep A Cisplatin	Kuramochi Rep B Cisplatin	Kuramochi Rep C Cisplatin	Kuramochi Rep D Cisplatin	Kuramochi Rep A Paclitaxel	Kuramochi Rep B Paclitaxel	Kuramochi Rep C Paclitaxel	Kuramochi Rep D Paclitaxel	Kuramochi Rep A Cis/Pac	Kuramochi Rep B Cis/Pac	Kuramochi Rep C Cis/Pac	Kuramochi Rep D Cis/Pac
GACGAATCAGGCCCTCGAACGTCA	TRCN0000465206	ZDHHC11	468	380	309	269	239	327	379	367	301	488	454	265	317	216	349	113
GTTTCATACTGTAAGCTGGCCCCG	TRCN0000465207	LMOD1	416	312	235	240	276	383	382	353	358	409	216	425	366	183	261	454
CCAAGAGATCCAATCTGACACCAC	TRCN0000465209	PFKFB1	759	936	614	958	363	493	848	706	470	502	574	652	658	503	619	478
GTAGGGTCACACACTAGCGGCTCG	TRCN0000465210	NKAIN4	2784	2604	2832	2960	2124	2260	2330	2034	1980	1902	1968	2467	1805	1878	1857	1780
CTCCTTCAACCCACCTAAAAGTCG	TRCN0000465211	MRPS18A	1161	1043	1115	962	1235	757	770	782	996	672	710	621	808	758	707	959
CTCTTTTCGCGTAAAATAGAAACC	TRCN0000465212	TICAM1	1730	1604	1584	1386	1398	1475	1294	1471	1437	1507	1429	1218	1328	1221	1133	1151
TTCGTACTCCGGTTCCTGTGCTTC	TRCN0000465213	RHOG	3029	2814	2405	3068	2325	2463	2106	2442	1996	2202	2424	2128	1781	2133	1916	1992
TTTTAGCCTGGCGAAAACTGCTGC	TRCN0000465214	TRIT1	1357	1089	1058	747	1103	971	1147	1088	1185	919	644	1158	1041	870	1007	1187
TTCATTACCATAACTCGGTGGCCA	TRCN0000465215	CCDC114	1020	879	697	685	841	759	749	618	686	745	651	654	692	474	633	774
TTTGTAGACCATAAGGTCTAAGTT	TRCN0000465216	HAGHL	692	599	592	517	619	623	503	426	563	403	482	420	364	310	563	494
CACATGGCTGGCATCATGTCGTCG	TRCN0000465217	NABP2	1464	1497	1311	1579	1018	959	788	1027	930	863	711	996	778	845	1043	914
TGAGATCCACAGATCATGAGACCC	TRCN0000465218	TTC23L	1727	1721	1394	1483	1023	1301	1200	1242	1455	1286	1042	1125	1122	964	1084	1043
TCATACTGACGGTTCCCCACTCGG	TRCN0000465219	C3orf49	4754	4445	4026	4262	3879	3450	3886	3737	3061	3490	3297	3242	3054	3324	3217	3921
ATAAAGCACCCGCTCCGACAGGGA	TRCN0000465220	CELF6	659	457	405	432	371	417	355	355	417	355	222	280	225	312	396	285
ACGCATCCCATACATCCGCCCGGC	TRCN0000465222	PGAP3	593	550	235	272	421	405	405	330	311	517	283	423	464	458	410	423
GAATTTTCGTTAAGGGGTCCCCTT	TRCN0000465224	HSD17B3	620	456	357	392	565	456	453	477	493	603	480	319	336	585	490	513
GTCGCAGCGTATTGCCTGGATTGT	TRCN0000465225	ANLN	1224	1193	1088	1038	922	999	1162	868	686	895	705	1299	795	808	668	965
GGCGTAGGCCCCCGCTTTAAAGTG	TRCN0000465226	C5orf46	1492	1455	1319	1521	1015	932	750	1179	891	818	959	684	1023	968	1149	873
TATGGCCAGAGTCTATGCAAGGAA	TRCN0000465229	FAM217A	1969	1831	1058	1374	1291	1389	1140	1356	1616	1335	1212	1151	950	1186	1055	1094
ATGACCTGTCCGCCTTCAGTTGTT	TRCN0000465230	KCTD1	1321	1065	871	1097	1071	890	1126	1035	1015	1016	1063	859	845	1245	817	1105
TTTGATACAAACCTCAAATCAGCC	TRCN0000465231	CDK17	319	354	224	212	340	230	453	186	261	220	145	294	182	249	229	313
CTCGCCGGGAATAAGATTTCCTCC	TRCN0000465232	ODF2	0	0	0	0	0	0	0	0	0	0	0	0	0	0	0	0
TCGCGGCCTCATCCCCCGAATAAA	TRCN0000465233	ATOX1	3489	3639	4092	3461	2439	2345	2262	2299	2741	2704	2961	2613	2259	2170	2503	2412
CATACCCCGGGCCCCCAGCACACC	TRCN0000465234	ZBTB24	1639	1747	1704	1402	1232	1445	1469	1079	1530	959	1136	980	1162	915	1452	1121
CGGCGTACCTGTGTTTTGATTGAG	TRCN0000465236	DPH3	4105	4220	5514	5249	3045	3409	2800	2483	2752	2819	1962	2532	2477	2844	2653	2341
AATGCATAAGCAGAACTCAGAGTC	TRCN0000465237	LILRA4	680	480	392	363	556	535	615	562	562	567	339	426	404	663	495	604
CGGCAGATCCCCCCACGAACCTTC	TRCN0000465238	EIF4A2	1942	2131	1984	1821	1245	1618	1598	1345	1041	1361	1412	1347	1153	1138	1279	995
CTTAGCCTAGCTGATTATTTGTTA	TRCN0000465239	CELF5	668	534	502	367	506	297	431	415	421	445	529	484	433	628	490	563
ATCCTCCAGCGTATTCTTCTACCC	TRCN0000465240	C11orf73	194	164	157	108	109	182	171	186	158	144	83	168	128	149	115	233
CCTATAATATTCCAAGTGTCTTTA	TRCN0000465241	HAGHL	1850	1735	1179	1304	1405	1312	1140	1295	1642	1111	1513	1489	1160	1171	1398	1476
AACCCCGAAGTTTGTATTGGCTTT	TRCN0000465242	SIRPA	300	281	162	129	192	223	281	246	191	118	197	199	295	228	192	285
CTTGCTTCCATTTGGCCACTCGGC	TRCN0000465243	ZMAT4	4673	4467	4195	4207	3496	3352	3516	3451	3200	3130	2988	3046	3347	2747	3148	3255
TGGCACCTCTATTGTTGAAATTCC	TRCN0000465244	NCOA4	1521	1578	1111	928	1077	1013	857	893	1082	902	1188	1024	961	795	1104	1123
CACGAATGCACACACAACGACCCG	TRCN0000465245	SP2	4206	4727	4547	5472	2714	3673	2937	2802	2660	2735	2493	3172	2762	2357	3229	3153
CTAGCATGTCGTGCTTTATCCATG	TRCN0000465246	MAPKAPK5	556	476	426	469	338	436	538	423	235	322	463	305	294	303	331	397
AGGCCGCTTCAGATCCCCCCAATG	TRCN0000465247	ACPP	1201	1085	738	961	1080	667	973	972	684	668	756	633	562	834	818	759
CTGCCAGGTTTGACATAATTAATT	TRCN0000465248	SEC61A2	102	96	78	77	22	59	89	72	62	69	54	203	118	64	80	112
CATGAGTTGCAACCCAAACGAATT	TRCN0000465249	DSCR9	3597	3482	3594	4136	2472	2344	2612	2719	2299	2637	2604	2556	1967	2412	2717	2269
TATTCTCTTCAGGCCTAAATGACA	TRCN0000465250	NO_MATCH_238	442	407	471	251	280	292	296	303	257	491	317	355	260	222	306	469
ACATGAAGGACGGCGCTCCTATCG	TRCN0000465251	XLOC_l2_009500	2463	2316	2854	2185	1702	1746	1451	1867	1764	1798	1890	1335	1574	1460	1440	1789
ATTATGAATCCCTAAAAGGTGACA	TRCN0000465252	TMED5	2537	1875	1382	1267	2135	2097	1981	1904	1983	2102	1737	1908	1541	1709	2007	2370
CTCCACCCCGAGGCCGGGTTTTAG	TRCN0000465253	MYO1C	317	257	240	201	336	315	286	282	157	97	166	173	249	81	179	172
CACGGGTCACACGGCCGTGAAAAT	TRCN0000465254	NO_MATCH_91	5988	6063	7625	6267	4328	4532	4087	6030	4326	4144	3724	4298	2924	4005	3897	5169
GTCACGATCCTCAATATGTACTGG	TRCN0000465255	GJA3	931	809	685	699	605	420	499	646	515	584	595	456	525	503	557	534
TGGGTTGCTTGTCCAAACATGATT	TRCN0000465256	MPG	597	579	596	545	367	302	389	486	338	429	509	550	320	340	430	331
CCAGGCGTACTCATATGTTAAATG	TRCN0000465257	RHNO1	10428	10853	12422	11199	9265	9228	8786	9037	6940	7133	6737	7819	7884	8922	8287	7511
CTAGCTAATTCGCGGACTACCATC	TRCN0000465258	TMED10	6403	6210	6467	6134	5005	4852	4536	4438	4460	4590	4495	4197	4052	3918	4229	4885
CCGTCCAGCCGGTATACATTTAAA	TRCN0000465260	CLDN10	1707	1504	1787	1657	1093	1139	1163	1045	1232	1274	975	1286	1184	1074	1052	1165
CCCGGCCCACGTAACTTCTTTGTG	TRCN0000465261	SLC47A1	1958	2121	2216	2356	1718	1470	1293	1394	1369	1413	1433	981	1145	1089	1434	1168
GATGGAACCCTTTCTCTATATGGT	TRCN0000465262	INTS7	116	130	95	79	103	148	99	173	99	52	107	165	25	133	42	70
AGGAATGTTACTACTGCAGGTCGC	TRCN0000465263	SNX24	5293	4886	4415	4480	3944	4269	4352	4039	4153	3879	3813	3457	3163	3763	3876	4108
TCGCCCCGCTTATTGGGACAGCGC	TRCN0000465265	PPP1R8	1531	1358	1345	1578	1220	937	1165	973	1032	980	1072	1017	1039	1124	935	1229
CCGGTTTATGTGTTTCTCGGTTTC	TRCN0000465266	BNIP1	1965	2074	1915	1834	1446	1472	1495	1480	1365	1493	1117	1366	1253	1294	1145	1244
TGCACAATCACATTTAATCCTCGT	TRCN0000465267	GCLM	2933	3051	3875	2898	1970	2015	1924	2227	2071	1982	2108	2033	1834	2023	2026	1867
CTATTTCCCGGATACTTTTTCGAA	TRCN0000465268	NUP210P1	1800	1844	1618	1910	1814	1369	1431	1588	1245	1292	1546	975	1390	1490	1462	1535
GTAGATCGGTAGTCGGGCTAACAC	TRCN0000465269	OTX1	1327	1146	536	609	1126	1317	1236	926	1032	1075	771	1033	849	890	931	970
CATAATTAAGGTCCATATACTGTT	TRCN0000465270	GRIA1	982	831	432	890	751	879	747	642	673	675	479	588	480	748	500	528
GACACAACAGCATGCGGAGCAAAC	TRCN0000465271	AKR7A3	122	181	96	233	158	89	109	187	83	120	140	55	141	119	81	130
TAAGAAGCCTATATGGTCTCCTCT	TRCN0000465272	CD7	3409	3121	2756	3594	2478	2549	2131	2326	1829	2328	1615	1997	2081	2440	2181	2154
ACGGAGATAGTGCAGGTACTCAAA	TRCN0000465273	XLOC_007668	2226	2019	1996	2006	1790	1496	1761	1458	1685	1726	1713	1356	1238	1489	1498	1582
AATTCTCGGGCCTTAAGCACTAAC	TRCN0000465274	TUBA1C	1692	1239	641	833	1413	1231	1723	1169	1376	1240	1557	1419	858	1186	1240	1478
CTGGCGAGGCTTCTGCTGCCTTGG	TRCN0000465275	MAPKAP1	2220	2520	1818	1617	1531	1671	2045	1710	1682	1757	1298	1539	1502	1584	1370	1833
GATCAGAGAATTTTGGATAAAAAA	TRCN0000465276	GALK1	569	447	397	615	353	426	515	474	413	353	358	448	459	474	361	481
CATCTCTTCCAATATTACACACAT	TRCN0000465277	DYNLL1	7887	7669	7343	7418	6516	6133	5380	6003	5856	5435	5487	5566	5158	5047	5299	5323
CAGCACTGCACGGCCGCGGCCATT	TRCN0000465278	HLA-DPB1	1238	1169	871	1081	838	642	813	896	840	859	755	684	708	647	765	891
CAGTTCAGCTACACACAGTAATTT	TRCN0000465280	AAMDC	344	266	279	272	301	301	196	126	208	200	268	171	131	101	87	162
GCCATTATGCCAACTTATAGTTTG	TRCN0000465281	HOMEZ	3700	3396	3076	3003	2758	2799	2762	2804	2497	2625	2693	2430	2482	2978	2495	2220
TTCCCAGCGCTGCTCTCCTCGTAG	TRCN0000465282	MSMO1	877	756	649	544	510	577	596	514	737	586	472	685	422	455	608	344
CGGCTGAAAAAAAGTGGGTGCGAG	TRCN0000465283	ATP6V0C	5286	5480	5742	6514	3896	3122	3498	3655	3203	3226	3129	3277	2635	2449	3603	3354
TGTTACAAGAGCCCCTCTGACCCG	TRCN0000465284	MIF4GD	1741	1629	1094	1438	1192	1196	875	1278	1041	1008	1093	903	880	877	1182	1284
ATGAAGCAAAAACATACAATAAAT	TRCN0000465286	TCP10L2	390	281	294	232	243	333	227	272	328	183	185	417	290	383	256	206
CCCACCGCCAACCTTGGGCGTTCT	TRCN0000465287	RECK	1829	1543	1685	1791	1162	1344	1126	1334	1567	1060	968	1302	1170	893	973	888
TCGGGGTTTTAGCGGAATGCCGCG	TRCN0000465288	HHIPL2	990	1072	676	597	809	581	1092	504	688	687	631	521	299	644	524	715
CATCACCGGTGACCCACTTACAAA	TRCN0000465289	KRT19	1588	1535	1415	1333	1283	886	1253	1140	941	1076	1057	1170	1222	810	786	853
CTCATCTTCGCTGTGGTCCTGTTG	TRCN0000465290	KRCC1	2616	2190	1851	2027	2044	1594	1997	1892	1445	1596	1969	1896	1475	1819	1941	1982
TGGTCACCCCCCTTCGGCACCTGG	TRCN0000465291	CALM2	1704	1667	1528	1792	1217	1223	1382	1139	1320	1078	1002	1256	781	1104	1319	1189
CTTGTGTCCGAAAAACGAACGGCA	TRCN0000465292	SLC25A48	2027	1800	1813	1821	1472	1260	1254	1318	1256	1316	1339	1127	1164	1654	1277	1510
CCTCGATACTTAAATCTGTCCCAA	TRCN0000465293	C2orf88	3459	3810	3447	3531	2528	2658	2551	2715	2589	2889	2050	2391	1744	2743	2451	2421
CCCGTGTGTCGTACAAGTTACCCT	TRCN0000465294	MPP1	528	494	398	426	521	344	302	400	413	232	264	364	207	348	390	320
CAGCAGTATATACTTAGGCTTGGT	TRCN0000465295	OTOA	18	30	4	16	0	0	21	27	43	0	0	8	32	1	0	0
CAAAAGTAGTTTCGTAATGAATAT	TRCN0000465297	C1orf210	3455	3354	3664	3378	2417	2307	2747	2659	2503	2349	2475	2568	2322	2384	2276	2353
ACAAGTGTAGACGTAAATCTCAAT	TRCN0000465298	FOXR2	1406	1239	371	515	496	265	680	369	591	528	431	654	363	524	432	361
CCTTACTATAAAGAACGGAATGAC	TRCN0000465299	PPP2R3C	994	848	681	652	788	628	527	526	727	622	524	346	597	435	585	447
ACAAGGGACTACCACAAAACGTCA	TRCN0000465301	LCMT1	1211	1048	1271	899	1048	953	1033	759	777	795	719	707	879	611	914	649
AGCGCAAGTGCCCGGTGGGACTGC	TRCN0000465302	ASB9	4643	4158	3377	4244	3325	3179	3374	3584	3668	3143	2810	3005	2892	2785	3250	2892
GCTGCAATGAATCTATTGGTGTCC	TRCN0000465303	MGC34796	4719	4662	4661	4790	4004	3485	3143	3679	3408	2821	3174	3735	2703	2905	3190	3364
AATTAATGTAGTTTTCACTTTCTC	TRCN0000465304	RRAGC	1069	788	348	514	877	1065	818	811	1179	751	794	854	738	760	868	890
AACGTATAACAGACTGGCGGCGAA	TRCN0000465305	PUS7L	240	161	46	114	73	55	106	172	130	152	64	91	88	114	147	69
TCCGCGTCGTTCTCTCACTGACAT	TRCN0000465306	SPATC1L	796	769	686	622	617	455	583	521	484	423	540	529	476	464	383	387
CCGACAAATGACTTCGTTAGGTGT	TRCN0000465307	NUDT4	2235	2352	2647	2380	1646	1538	1624	1550	1342	1564	1461	1427	1127	1286	1403	1433
GAGCCAATAGGTTGGGCTGGTAGC	TRCN0000465308	PCBD2	3365	3081	3417	2892	2524	2866	2724	2353	2408	3017	1983	2457	1673	2069	2240	2352
ATGAAACTCTTAGAACAAGTGTAC	TRCN0000465309	ADAMTSL1	885	752	459	430	695	899	632	769	706	693	777	837	430	482	558	726
GCACACGTCCTCGGGAGCTTGCGT	TRCN0000465310	FEZ1	1398	1178	959	953	1184	1157	1208	988	1011	1075	740	806	945	1123	927	923
GCCAACATGTGCCCTCTAACCCGT	TRCN0000465311	ENOX2	2186	2030	1669	1874	1461	1443	1505	1582	1412	1578	1447	1513	1125	1169	1592	1567
ACGATTGTTGGAAAAATCTGAGGT	TRCN0000465312	PAM16	3682	3174	2829	2797	2799	2656	2965	2376	2803	2876	2182	2335	2324	2319	2344	2448
GCCTACCTGTGCTGAACTGAAAGG	TRCN0000465313	THSD4	1145	1062	1023	810	778	763	745	638	819	619	710	941	673	698	686	836
AGCCAGTACTCTATTCCGAAGGCA	TRCN0000465314	XLOC_l2_011027	2826	2558	2142	2648	1828	2045	1343	1896	1532	2109	1827	1867	1713	1836	1758	1913
ATCCGACCTACTTATATGGAAAGC	TRCN0000465315	NPRL3	876	618	601	504	640	624	482	710	563	574	629	569	535	517	487	574
CTTTACACTATGACCCAGCCACCA	TRCN0000465316	GPATCH2	750	735	649	675	555	532	763	638	498	504	662	484	514	484	474	392
TACGGATACCTTGCGCACCCCACG	TRCN0000465317	DGCR2	1546	1561	1174	1481	1047	1097	1221	1226	923	1036	1056	1168	763	998	1187	855
TAAAACCAATTAGCCTCCCGTGAG	TRCN0000465318	FGFRL1	1455	1393	1529	1752	1064	1037	918	1071	786	1202	664	811	801	709	753	1088
GGACCGAGACGTCTTAACCAATAT	TRCN0000465319	SMPDL3A	3572	3894	3273	2798	2849	2835	3073	2979	2231	2479	2289	2287	2444	2054	2911	2252
TCTATGAGACGTCATCGCGGCCTG	TRCN0000465320	APEX1	2670	2303	2147	1879	2129	1802	2126	1921	1547	1727	2033	1817	1518	1482	1889	2027
ACTGATACGCAAATTACATGTGGA	TRCN0000465321	LIPF	1160	1084	639	778	865	1109	814	916	1062	694	932	794	738	696	876	774
CTCTGAGACGCTGCAATCGACGAT	TRCN0000465322	TMEM35	4009	3915	3880	4295	3244	3242	2822	2922	3123	2956	2650	2427	2639	2638	2931	2743
CACTGGCTCCTTCTACCGCATGGG	TRCN0000465323	NAP1L1	983	1039	897	966	766	924	1047	681	772	670	595	605	583	526	773	842
TTTCGGCACTACCTGGTCAGCATA	TRCN0000465325	VAPB	3260	2700	2244	2193	2860	2321	2736	2384	2551	2354	2269	2053	2335	1871	2055	2297
GCCTATTAACACACTAGCACTATA	TRCN0000465326	HSPB8	669	583	605	515	474	530	599	391	474	475	415	524	467	572	478	419
TATGCTCCCACTTTCACTCCAGTA	TRCN0000465327	CNPPD1	1285	1174	1115	1191	879	949	914	969	1282	815	758	1026	1210	940	707	848
CGGGGACCCTCTCATCGACTCACT	TRCN0000465328	FCER1G	3846	4003	4519	5819	2800	2872	2607	2470	2312	2589	2380	2585	2438	2549	2248	2501
TACTTCCACCACCCCACACTTTTC	TRCN0000465329	KLHDC3	5066	4636	4181	4959	3595	3717	3537	3673	4033	3310	3472	3471	3201	3263	3417	3308
CGATGGGTATCCCTGACTGTTAGA	TRCN0000465330	EAF1	2546	2515	3017	2807	2151	1845	1586	1622	1877	1252	1631	1937	1599	1150	1803	1688
AAGGGCAGGACCAAACTTTCATAA	TRCN0000465331	FAIM	9	9	1	2	9	8	1	7	8	4	7	1	7	17	6	10
ATTGTATTCATGGAATAGACGTCA	TRCN0000465332	CAMKK1	458	333	172	159	380	396	296	402	320	309	266	379	305	345	217	312
GGTATGAGCGCGGTGGTCAGGCCT	TRCN0000465333	MTERF1	2364	2120	1645	1892	1447	1547	1529	1939	1535	1700	1567	1735	1779	2062	1441	1496
ACGTCGTCGTCGGAAGCTCCGACC	TRCN0000465334	S100A16	819	634	526	597	507	655	652	545	530	587	515	511	416	549	459	533
ACTGCCCCGGTTCACTACGAAAGA	TRCN0000465336	FAM177A1	4555	3711	3459	3816	3461	3177	3707	2790	3061	3301	2695	2932	2684	2583	2598	2718
GTCAAATGTCTTGGATAACAATGT	TRCN0000465337	CENPA	5121	4276	4242	4635	3668	3784	3675	3343	3655	3624	3770	3468	3203	3386	3422	3655
GATCTCGCCGAGCCAAACTTGCCT	TRCN0000465338	MSI2	337	263	181	181	253	217	173	284	171	269	87	287	170	131	288	163
GCAAGTGGATTTAGGATTTTGTCT	TRCN0000465339	RPL34	1002	935	947	962	1012	833	787	787	771	710	821	699	631	547	465	596
AACGATCCGCACGGGGCTGGTTCT	TRCN0000465340	P2RX5	276	232	170	212	279	161	244	241	161	173	192	190	150	228	189	112
TGGATACTAGCATGCCCCTATGTG	TRCN0000465341	RBMX	1632	1653	1306	1241	931	1189	714	1115	1265	1090	1057	1004	953	1296	1022	1244
CTCCTTCTTTCGTAAAACACAACA	TRCN0000465342	JAK3	257	197	183	99	156	208	234	225	167	189	276	161	253	131	215	127
GCCTTGGGAGACATTCGGCGACTC	TRCN0000465344	HN1	3039	2844	3303	2905	2589	2131	1879	2078	2299	2350	2445	2026	1869	2341	2491	2600
ACAAAGGCTTGAAGTAACCCCAAC	TRCN0000465345	TEKT4	1037	1023	786	746	832	880	630	542	690	794	846	1048	775	683	669	886
GAGCAGATTCTGTGTGGGACTGTG	TRCN0000465347	NAA10	2361	2333	2305	2371	1965	1753	1865	1922	1875	2132	1966	1654	1675	1396	1717	1954
TAGGGTCCGCGCCGTGCGTGGTAC	TRCN0000465348	TMCC2	1135	1034	1004	806	762	653	758	902	911	733	635	959	542	754	729	530
TCTAAAATACATGATCTGAAATTC	TRCN0000465350	ANGPTL4	1930	1745	1584	1425	1327	1564	1553	1244	1432	1209	1122	1148	1123	1348	1375	1372
GCGCTCTGATTACTGATGGCAGGT	TRCN0000465351	YIPF5	37	45	17	43	49	15	1	50	27	10	24	97	30	0	40	8
GATGGCAATATAAGTGATGTTCTC	TRCN0000465352	GTF2IRD2B	17	18	10	2	8	1	6	33	8	0	26	7	0	0	22	48
ACTAATAACATTGGTCCGTTAACG	TRCN0000465353	ASS1	765	602	599	483	517	563	503	402	440	584	547	526	405	239	510	363
TGCGAGTGCCCGGAAGGCCCCTTA	TRCN0000465354	CLDND1	1147	1228	1126	1214	816	656	704	958	659	622	719	637	779	654	551	808
TTGATTTCCAGTGCGAGAAGACCG	TRCN0000465355	HMX2	406	327	252	120	303	492	271	323	187	217	193	311	243	290	269	377
TCCAACTCCGTTTCATGTGCTCTT	TRCN0000465356	NO_MATCH_242	1419	1085	1203	1151	1158	904	827	960	1066	799	776	566	733	581	879	514
CTTACTCGAGAAGCCTAGGAGATG	TRCN0000465358	ZNF302	67	67	36	26	77	40	37	4	9	54	57	87	23	15	14	2
TGGTCTACGAGAATGCGCTCGCGA	TRCN0000465359	HSP90AA1	373	400	219	245	266	251	216	256	347	198	249	213	197	248	231	237
AGACAGAAGGTACACGGATGGCGA	TRCN0000465360	ECH1	650	630	621	531	415	617	449	514	360	435	423	557	347	546	521	227
CACACGATAAGACCAAAGCAAGTG	TRCN0000465361	P2RY2	864	790	336	343	694	389	489	469	540	554	450	413	541	414	445	480
CCGTTCCGGCGGTTCACGTTACCG	TRCN0000465363	PLA2G1B	2133	2105	1966	1834	1372	1724	1285	1604	2560	1628	1525	1458	1254	1390	1356	1288
GTCTTCGCCATCGCGTTCTGGAAC	TRCN0000465365	DOC2A	749	594	440	527	724	764	669	515	592	722	461	540	511	504	716	568
CATTCTTCTTCGGCTCAAGACAAA	TRCN0000465366	ETNK2	689	662	598	787	374	611	652	696	543	562	524	469	494	378	584	840
CCCCCTCCTCTAAACAATTGGTAC	TRCN0000465367	PXK	989	1077	813	964	535	734	695	702	617	529	553	629	435	863	628	557
GCCACGCCGAGCGCAGACTGGTCG	TRCN0000465369	DYRK3	977	902	728	790	521	706	833	579	631	801	620	673	338	614	465	393
ACCTCTACGGAGATGCGAGGACGA	TRCN0000465370	SDF2L1	1260	1142	1176	1044	1062	962	917	1163	738	969	931	943	878	811	819	899
GTTCGGCAACTTGGTCATTCCTGG	TRCN0000465371	CUL3	186	141	74	64	105	175	177	103	152	125	88	113	128	137	38	71
CCGACGGGGCTAGTGATCGCCAGG	TRCN0000465372	WFDC11	4953	5155	5827	6124	3911	3294	3504	4127	3579	3283	3208	2824	3152	2782	3500	3363
AGCACGGGCACTTTCCCCGGGACC	TRCN0000465373	NHLRC1	1939	1830	2059	1737	1569	1229	1696	1390	1389	1336	1126	1418	897	1147	1275	1243
AAGCCATATTTCATAACCAGGTTG	TRCN0000465374	SPINT1	618	415	344	413	433	480	333	437	369	338	316	452	267	333	500	445
TAACGATTTAATCCCGCAGACTTT	TRCN0000465375	CCDC148	1738	1566	1752	1363	1340	1177	1302	1172	1418	1365	1298	1268	938	994	988	1351
CGCAATTACCGCCGTCAACACTGT	TRCN0000465376	MAP3K6	142	189	65	145	118	178	124	107	106	142	44	53	100	93	75	133
ACACAAAGACGATGAGACGCTTTT	TRCN0000465377	BMPR1A	899	873	514	615	619	708	658	561	493	589	663	367	508	406	521	553
ACTTAGACCCCAACGAAGTGAACA	TRCN0000465378	TNFRSF6B	2692	2503	2922	2590	1969	1796	1737	1770	1596	1903	1610	1454	1401	1552	1558	1487
ACGTGGGATAATGCGCGGCGTATT	TRCN0000465379	CRYGA	6688	6192	6968	6970	5387	5362	5418	5156	4725	4794	4396	4519	3934	4778	4640	5011
ATAATCAGGTGTGAAATCTATCAG	TRCN0000465381	REEP2	195	112	200	69	130	119	113	73	127	158	46	202	128	146	64	63
ATGGCGATGCACTGGCCCACATGA	TRCN0000465383	MGST3	1654	1342	439	418	650	708	683	686	441	854	546	763	536	588	625	776
GACGCGACGGTGTGGAGACCGTAT	TRCN0000465384	MGST3	2065	1950	1742	1509	1465	1738	1820	1402	1574	1444	1420	1486	1475	1749	1693	1580
CTACCTAATATATCTTACTAATCC	TRCN0000465385	RENBP	1956	1890	1328	1364	1433	1521	1344	1542	1408	1521	1168	1434	1323	1409	1356	1314
TTGAGTTATACTACCGACGATTTG	TRCN0000465386	SLC37A3	68	87	34	67	48	42	66	90	58	182	37	62	23	46	54	95
GCTCCTCCCCAGGGTTGCAGGGTG	TRCN0000465387	S100A7	1233	967	1237	963	1072	747	891	823	753	772	895	526	770	687	796	631
TCACCAAACTGTGCCACGGGTCGA	TRCN0000465389	STEAP1B	3687	3597	3588	3327	2839	3138	2680	3068	2433	2509	2447	2388	2023	2362	2380	2372
ATCGGCAAGCCATCCCTGGATCAC	TRCN0000465390	SHC1	673	463	437	327	464	357	465	426	450	520	415	263	263	436	401	591
CTGTAGTTTTTCCGGGCTATACTC	TRCN0000465391	PLK1	162	157	89	96	120	81	163	106	93	80	132	83	12	151	60	88
AATTCTTTGTGAAACAGAGTACAT	TRCN0000465392	ARHGAP8	459	297	115	154	345	388	355	258	334	259	336	252	307	332	360	356
CCGAGCTAACCTATAGCACCACCA	TRCN0000465393	PTK2	609	524	345	378	478	132	338	292	293	356	396	250	541	317	270	529
GGTAACAGCCCATGAAGGTGTATG	TRCN0000465394	SUB1	6222	5908	7164	7332	5562	4233	4017	4282	4977	4598	4580	4388	4082	3669	4064	3809
CCCGTTATTTACTGAGACAACGAC	TRCN0000465395	COL20A1	761	721	444	378	404	416	352	373	224	492	440	397	361	359	481	638
ATGTGTGAGAATGTTATACCAGTC	TRCN0000465396	SLC48A1	1507	1307	1052	1165	1273	1297	1140	1010	1008	1077	1052	986	948	954	1084	1365
CGTGTAGCACCTTCTGGCTCTCTA	TRCN0000465397	HMGN2	2008	2303	2310	2533	1680	1248	1387	1430	1571	1537	1305	1158	1153	1309	1438	1199
CCCAGAGACAACCCGCAAACTTCG	TRCN0000465400	AGBL3	1589	1566	1464	1048	1042	925	734	662	1143	1292	566	621	734	1018	1036	873
CACGCCTATTGTCCATGACACCGT	TRCN0000465401	CALML5	928	973	1151	1002	623	681	556	720	707	668	746	619	669	560	779	702
CTAGCGAGATACATAGTTCGCTAC	TRCN0000465402	FGFR2	745	747	519	629	583	564	538	440	678	484	307	539	530	484	498	476
TCTTATTACGTTTGTAATGTCAAA	TRCN0000465403	ELOVL5	1047	883	727	750	599	849	895	1307	947	910	650	827	723	755	809	779
TCGGGACTCCCCCGGGGGTGGAAC	TRCN0000465404	OGFOD3	1763	1650	1163	1442	1066	1077	1441	1165	1440	1038	1043	1130	1104	934	1001	1319
GGGTTACTCTTTATCGCTAATTCC	TRCN0000465406	BCAN	645	452	302	403	363	483	329	623	359	282	206	420	369	478	478	535
GCAGCCAAAGCAAGGATGCCCGGA	TRCN0000465407	HEY2	2164	2371	2594	1603	1926	1894	1896	1704	2009	1655	1773	2116	1796	1412	1489	1648
CACCCATAGAAGAATTACCGCCGA	TRCN0000465408	NPIPA1	8445	9023	10327	10920	6004	5805	6094	5887	6131	6524	4969	5904	4537	5036	6248	5657
AGGGACTCCATCAGTGAATGTACC	TRCN0000465409	GPR180	3244	3001	2623	2596	2125	2544	2591	2528	2366	2360	2508	1962	1936	2397	2168	2070
GTCTAATCTTTCATAAAAATGCCG	TRCN0000465411	PEA15	607	519	563	554	378	503	397	636	482	699	519	425	378	378	357	336
GAGTGACTGTGTTGATCTTGACTA	TRCN0000465413	HIGD1A	291	266	247	241	257	332	222	186	133	307	235	399	208	140	215	234
TTTGTTCTGCCATCCCTCGTATTC	TRCN0000465414	RNF5	678	497	311	304	431	366	348	515	437	413	390	532	268	424	446	376
AGTCCGAGTGCTACAAAAACAAAT	TRCN0000465415	ATF6B	1098	801	626	638	614	855	661	659	594	719	530	444	601	608	867	624
CACCCCAAGATATTCTTCGATTAC	TRCN0000465417	RPL30	5503	5731	6472	6943	3918	3645	4381	4216	3877	4065	3582	4005	3308	3842	3679	3659
AATATCTCAGCGAGGGGATTAATA	TRCN0000465420	SYT16	436	370	212	225	401	391	415	262	328	430	401	308	295	384	339	336
TATATAACATACCCTTTCGAAGCT	TRCN0000465421	DYNC1H1	1878	1627	1604	1321	1162	1374	1413	1378	1433	1678	1943	1372	1191	1059	1205	1296
AACTCAGCGCCAGAGCCATAACGC	TRCN0000465422	OSMR	2487	1834	1765	1678	1969	1593	1969	1892	1789	1708	1741	1883	1341	1540	1744	1522
CAAGGTCACGGCCACGCTCGGAAA	TRCN0000465423	LINC00486	5843	5968	6194	6264	4435	4251	3987	3862	4070	4117	3604	3607	3866	4426	3774	4235
AGAGGACCTCTTTCGGCACCTCGG	TRCN0000465424	TSNARE1	1075	1173	719	1000	943	710	1049	758	1194	889	725	647	907	757	617	909
AGGCCAAGTTCTGACCGGTTATAA	TRCN0000465425	TMEM80	4668	4215	4183	4034	2974	3257	3214	3131	3526	3156	2711	3088	2562	2273	2903	2433
GCAAACGGCGACAATCATTATAGC	TRCN0000465427	BRAT1	3051	3047	3510	3177	2357	2164	2227	2004	2219	2521	2296	1906	2165	1730	1941	1638
TGTAATTCTTAACGTAACGTACCT	TRCN0000465428	ZNF641	5198	4883	4113	4322	4116	3784	3429	3662	3554	3850	3208	3239	3411	3135	2913	3328
GCTCTGGAGTCGTTACAGTTTAGG	TRCN0000465429	DTX4	276	233	219	161	130	169	219	177	111	289	98	90	130	149	159	255
GCGACATGGAAGAGCTAACTACAT	TRCN0000465430	KIAA1324L	570	527	368	211	493	303	683	479	579	373	378	306	271	307	515	420
TCGACCCCCGCCGTCGCCAGGTTG	TRCN0000465431	TAC4	1740	1736	1813	1913	1385	1542	1298	1133	1462	1040	1326	1152	1018	1076	1136	1284
CCTCGTCACCTTATTCTCTAAGCA	TRCN0000465432	A1BG	1022	971	933	1087	748	736	739	611	632	605	730	719	720	596	725	643
TACAGATGCCATTAACTCAATACA	TRCN0000465433	RWDD4	3481	3156	3344	3440	2500	2167	2191	2649	2291	2299	2286	2552	2013	1990	2376	2611
AATGCGTTATGTGTCGTTGCAGGT	TRCN0000465435	PLAT	457	411	232	374	437	422	337	296	352	279	368	406	363	285	386	379
AATCGGCGTTGTGACCCGCCTTGA	TRCN0000465436	ATP1B1	119	69	65	67	58	119	82	94	80	92	60	102	64	53	87	67
ATTTCCATTAATTAGTAACCGTTT	TRCN0000465437	ZC2HC1A	788	561	463	333	690	691	821	573	611	486	553	643	601	519	623	1242
TCGCGTGACTATGAAGTCCGGGAA	TRCN0000465438	SLC25A30	2894	2775	2490	2802	2281	2025	1884	2115	2605	2257	2132	2400	2010	2118	2053	1997
GCGCTGAGTGGGCAGAGTTCCATA	TRCN0000465440	CSTA	2161	2056	2367	2082	1916	1818	1868	1848	1464	1680	1519	1627	1563	1629	1629	1476
CCTGACTAGTTGCCCATCCCATAG	TRCN0000465441	IFT80	156	157	19	181	117	98	185	106	129	111	74	108	35	88	149	214
GCTCCCAAGCAGACGTAGGAGGGG	TRCN0000465442	PRICKLE3	998	866	646	567	481	738	669	609	414	573	552	741	564	406	451	494
GGGTGATCCCACGCAGCTGAACCT	TRCN0000465443	SMIM2	2316	2318	2668	2174	1497	1825	1369	1488	1570	1562	1770	1466	1459	1088	1454	1149
TTTCCCTAACCATGTGAATACAGC	TRCN0000465444	FLT3	132	138	46	56	173	143	179	163	116	146	60	132	51	170	79	15
GTGGGTAACAGGAGCAGAAACGGG	TRCN0000465445	GBP3	2321	2123	1736	2148	1794	2148	1833	1794	1679	1983	1694	1789	1290	1510	1528	1747
TTGACAGCCTACGGCAATACTGTC	TRCN0000465446	PRAMEF15	1988	1879	1463	1596	1551	1933	1770	2018	1442	1568	1703	1409	1414	1484	1340	1492
ACTCTCAGAGATTCTTAGAGGTAA	TRCN0000465448	MSC	927	782	410	395	579	739	716	567	439	445	260	778	469	378	546	445
CCCTTGGCCACCCGTCCCCTTTTA	TRCN0000465449	LSM2	1581	1557	1614	1407	1241	1199	1215	1114	978	1070	861	867	952	895	958	879
CCGAAAGCAACTTGTTGGTTTCAC	TRCN0000465450	SH3BP5	648	566	506	445	417	487	593	396	380	360	530	447	365	525	350	377
ACCGAGGTCTATATCCGGGTCAAT	TRCN0000465451	RWDD3	1685	1618	1627	1405	1304	1589	1005	1165	1098	988	1334	907	952	787	1109	1091
ACTCTCTGTTATTACCTATAAACG	TRCN0000465452	PRKCE	620	501	431	330	628	389	583	361	482	351	340	346	415	370	420	325
TGACGAGAATAAGATGAGGTGATC	TRCN0000465453	C8orf74	1088	1170	1176	1380	836	684	903	871	807	563	790	658	477	421	429	820
TGCGGGACTCTAGATTTATACGTA	TRCN0000465455	F3	4241	4062	3967	4447	3376	2225	2430	3260	2322	2242	2728	2587	1961	2984	2334	2576
TACGGGCAGCTAATTAATAGCCAA	TRCN0000465456	XLOC_l2_009889	2848	2862	2664	3497	2021	1837	2265	2233	2161	1506	2061	1708	1683	1847	2076	1819
ACTCAATCTGAGCTGACAATACGA	TRCN0000465457	L3MBTL4	1347	1264	734	808	936	1231	1026	823	748	828	1037	1198	921	850	1051	903
GGAACTAAGGTATCGAAAGTCAGG	TRCN0000465458	GDI2	2291	2416	1589	1897	1729	2079	1706	2191	1674	1651	1368	1434	1416	2055	1340	1667
CCATCTGCTCGAATATGACCAGGT	TRCN0000465460	SPRY4	1906	2050	2005	1643	1183	1235	1435	1284	1309	1065	804	1331	1365	1222	1278	1371
TTCACAATTCCGATAGGGCGTGTC	TRCN0000465462	DNAJC17	276	244	176	163	186	196	135	226	211	303	185	70	232	160	209	166
GACATATTAACCCTTGTCTACTCG	TRCN0000465464	MRFAP1L1	1786	1494	1249	1519	1466	1014	1167	1209	1116	1126	1053	1165	862	1068	1095	1209
TGGTAGACTAATACCTAGCTCCGG	TRCN0000465466	R3HCC1L	3037	3074	3173	3701	2136	2326	2255	2659	1891	2498	1769	1890	1541	2189	1854	1679
ATCCAGACACCCCATTGTTGGCTG	TRCN0000465467	PI3	1593	1196	1267	1104	1085	1156	1060	999	908	952	972	1016	848	743	976	911
ATTCGTTTGTTTACACGGACATTG	TRCN0000465468	KCTD5	330	178	229	189	208	274	324	175	365	154	252	234	181	137	199	206
CCTGACATCCTCTCCATTGTTAGG	TRCN0000465469	PKD2L2	1615	1655	2093	1275	1026	1138	1161	1217	1337	1142	859	931	903	756	1159	892
ACTCTTCGTACTGGACCCTGATAT	TRCN0000465470	Zyg11b	1648	1344	1217	1060	1186	1136	1527	1300	1127	1276	1191	1019	972	1388	1018	974
GCCATTATACATATATCTAATTCC	TRCN0000465471	CLEC1B	155	157	128	113	127	6	119	122	170	133	56	64	130	105	42	117
TTACAGCAACTGCTGCAGTGGCAG	TRCN0000465472	Tbc1d23	814	825	749	763	848	610	763	786	575	721	876	499	510	670	606	644
CCCTCCAGGCTGTGCGCTCCAAGG	TRCN0000465473	HCFC1R1	10897	10997	12693	12303	8312	7720	7222	7655	7285	6857	5906	7966	6763	7127	7126	7389
TCTCGCCGCCATCCATGCGACATT	TRCN0000465474	SCRN2	1283	1168	918	948	898	1010	836	954	901	966	907	1033	685	916	916	838
AAGCAACCACGATGACCGTACCTA	TRCN0000465475	FAM209B	950	797	658	606	655	788	836	781	754	627	665	840	564	611	705	839
ACAGTTACATAATATATGATCTCA	TRCN0000465477	DNAJC30	3346	2900	2932	2780	2450	2409	2178	2161	2279	2606	2053	1958	1946	2075	1939	2117
GCCTGGGCGCCTGACCTGTTGATT	TRCN0000465478	FAM134C	358	382	249	378	274	288	198	312	284	271	183	173	242	173	215	191
CGCCACAGTTGATGACTAATCCAG	TRCN0000465479	COMMD8	5625	6302	7644	7429	3904	4000	4298	4466	3991	3970	3861	4492	3280	3678	3622	3732
CGGTCCGACATGAATCACGGGTCG	TRCN0000465481	NO_MATCH_133	559	634	460	513	386	382	387	278	322	352	453	261	220	293	263	246
CCATTATGGCCAACCTAAACGCTT	TRCN0000465483	NDUFV3	2006	2053	1596	1774	1395	1586	1510	1496	1519	1234	1363	1339	1308	892	1263	1389
CGGAAGATATTGTACATCACAGAT	TRCN0000465484	DLST	7577	8727	8352	8423	5138	5400	6012	5475	5827	6129	4636	5953	4816	4899	5093	4837
AAACATGAGATCAGGTGTTCACAT	TRCN0000465485	SPOCK3	1171	868	482	606	901	930	855	982	755	931	774	868	649	811	796	782
CTTCATACGAATATCCAGTACGGA	TRCN0000465486	SCML4	2863	2712	3600	2405	2093	2378	2488	2365	2399	2203	2154	2221	1375	1934	2405	1921
AGTTACTTACTTAGACCATTCTAT	TRCN0000465487	SREK1	1802	1477	754	697	1392	1480	1435	1247	1469	1134	1417	1111	834	1471	1308	1583
TGCAACCTTCTACTGTCCGTCGAG	TRCN0000465488	TMEM242	6426	6828	7002	6930	4336	4534	4301	4261	4885	4253	3339	4444	4439	4070	4053	3818
GTGGTAATTTTAACGGACCCTATA	TRCN0000465489	PTPN9	54	61	66	24	73	92	5	37	16	18	104	16	33	41	79	40
GAGATCAGAGCTTCTTTAACGTAA	TRCN0000465490	TMEM177	3555	2990	2948	2721	2998	2843	2684	2819	2819	3255	2735	2584	2225	2511	2468	3171
ATCGAATGGTCTAGCAACGGAAGC	TRCN0000465491	EBNA1BP2	1911	1586	1137	1194	1509	1215	1682	1187	1182	1387	1480	1601	1213	1260	1210	1094
GTATCAACCCGAAACAATTTACCT	TRCN0000465492	GLOD4	3867	3319	2699	2719	2986	2986	2848	2602	2654	2748	2998	2231	2715	2655	2962	3076
CTCGCACGTAGCCTCCAGTGACCG	TRCN0000465493	AFTPH	3685	3812	3776	3927	2610	3195	2529	2284	2354	2393	2307	2282	2253	2357	2232	2161
CAGACCACATTCCGAAGATTATTA	TRCN0000465494	MAEL	2369	2348	1584	2094	1741	1431	1995	1726	1453	1290	1440	1364	1252	1328	1543	1445
CAATGGGAACAACATCACCCATAG	TRCN0000465495	PTMS	1140	1150	1262	942	812	775	875	748	761	813	1084	790	692	745	893	615
TTTCGGCCACACCAAGTTGAAAGT	TRCN0000465496	BARX1	502	472	330	471	415	447	372	346	433	442	376	399	339	340	391	241
ACCCGCCCGAGAACTTTAAAAATA	TRCN0000465498	MUSK	398	397	377	197	334	396	351	422	192	298	240	318	232	453	267	319
TGATATCTACTCCAGACAAAGCCG	TRCN0000465499	SNX16	2958	2789	2723	2547	2020	1859	1902	1759	2157	1800	1527	2287	1476	1828	1849	1546
CTAACCAATAGCTGTCCCTCGACA	TRCN0000465500	PELO	796	695	776	549	609	514	581	632	403	379	496	608	615	445	530	592
CTGAATGTTGTTTTAGAGTTACGA	TRCN0000465501	CBLB	574	422	284	248	347	567	448	522	397	527	368	525	530	315	194	391
AAGACGAAGACGTGCTCCCATTTC	TRCN0000465502	NDRG2	806	709	451	459	494	677	868	690	662	556	624	490	499	823	470	508
GACTGATGGCTCGCGAGCTCGCTT	TRCN0000465503	JUNB	1268	1201	594	645	850	945	901	846	914	768	949	742	641	835	965	818
CCTACGACCGATCGCTCAAAGTCC	TRCN0000465504	ZNF706	7392	7598	9132	8396	5002	5100	4755	5398	5418	5326	4628	5256	4744	4510	5083	4584
TAAGCGGCACAAGTTCCCCTCGAC	TRCN0000465505	SPHK1	741	788	685	741	729	740	407	572	557	560	602	382	346	536	456	234
AACGAACAACTGCCAGGCCTATTC	TRCN0000465506	RBKS	627	437	384	416	417	556	513	422	444	440	362	565	348	425	380	470
CTAAAGTGTTCGTGTCGTCAGGAT	TRCN0000465507	MTMR7	887	852	560	459	674	562	630	574	455	485	574	639	705	453	377	483
AGACACAACGTTAATAATACAATT	TRCN0000465508	CRYBA4	3270	2864	2447	2789	2328	2424	2397	2393	2074	2503	2361	2442	2040	2033	1944	2010
CCTGTGTACTCGTGCACAGTCAAC	TRCN0000465509	BVES	4870	5006	4604	4430	3600	3485	3690	3670	3267	3479	3591	3674	3052	3283	3372	3912
TCTCCAGATTTCTTGGTATAGCAG	TRCN0000465510	POU5F2	3828	3550	3061	3291	3202	2707	2918	2414	2598	2440	2596	2741	2823	2500	2320	2626
GCAAACATGCCGTACGGTATCAAG	TRCN0000465511	NHLRC4	1307	1112	1757	1579	892	941	905	740	810	687	727	754	683	559	967	888
TACGGGCCCGTGCACATTAAAAAG	TRCN0000465512	KRTAP9-2	3019	3167	2851	3208	2054	2342	1884	2093	2036	1973	1958	1883	1943	1803	2034	2250
TGCTCATTGTATTAAGGTGATTTC	TRCN0000465513	HRASLS5	4632	4877	4215	4973	3296	3290	3597	3236	3081	3113	2818	3384	2890	3098	3336	3324
ACGGCACTCTATACGGCCTTTGGT	TRCN0000465514	ZFP36L1	817	736	404	513	631	657	790	684	539	483	511	310	400	593	466	565
GCGGCCCCCGTTGCGTCCTGAAAA	TRCN0000465515	PRPS1	914	930	983	720	687	701	762	803	697	880	653	607	622	505	728	558
CTGACAAAAATGTACAGTCACAAC	TRCN0000465516	KIAA0101	4099	4000	4484	4051	3012	3079	3473	2535	3201	3355	3071	2817	2522	2855	2799	3078
GTTGCCGATGGCTGCTATGAGATT	TRCN0000465517	NO_MATCH_218	1322	1083	1117	917	1066	994	894	883	1308	808	938	1008	1045	929	1163	1059
TCCGTGAAACATATGAGGCACTGA	TRCN0000465518	EIF4A3	2453	2386	1990	2075	1745	1482	1886	1682	1770	1867	1561	1698	1414	1758	1779	1614
CATCAGTGCAGATACTCGCAGCCG	TRCN0000465519	FUNDC2	2331	2307	2863	2302	1781	1495	1372	1581	1716	1806	1624	1325	1156	1693	1350	1818
CATACCCCTGGGACACATCATTGA	TRCN0000465520	NFE2	1586	1698	1491	1747	1071	1154	724	962	923	1095	890	1014	743	927	731	697
TTTTACGTACGTCTACTGTTGTTT	TRCN0000465521	ALG12	717	537	370	357	484	791	718	577	661	511	640	472	347	412	495	529
GAATTGCGCGCTTCAACACGCTAT	TRCN0000465522	RPL23A	1670	1418	1517	1689	1400	1081	1240	1222	1068	1216	1075	1263	1088	1040	1172	1644
GTACGGACATCCGCCAAAATCTAC	TRCN0000465523	PNPLA1	528	500	398	302	347	399	447	406	387	372	269	334	269	396	348	382
GCCATCGTCATACTCGTTGGTTCC	TRCN0000465524	DNAJC10	269	211	143	266	105	141	185	349	212	167	187	163	208	100	145	102
GGACTCATCTGGATCCTTTCTGTA	TRCN0000465525	KPNA5	2370	2207	1412	1288	1853	1970	2148	1566	1941	1320	1789	1681	1458	1972	1528	2102
GCACACCCGTGTCCCTTACAACCA	TRCN0000465526	CKS1B	3650	3687	3224	3795	2744	2609	2848	2872	2821	2567	2039	2459	2267	2663	2271	2298
ACCATTAGCTTTGGCCTCTAATAT	TRCN0000465527	HACL1	4565	4485	4015	4249	3641	3587	3737	3654	3308	3424	2981	3638	3020	2885	3137	3217
TCTGCTTATGCAGCGCAATCAGAC	TRCN0000465528	RGS8	1844	1533	1361	1279	1398	1538	1541	1320	1439	996	1307	1562	1021	1179	1173	1155
TTAGATGAATCCGCTCATATCGTA	TRCN0000465529	CDIPT-AS1	5064	4428	4014	4031	3799	3969	3556	3968	3451	3800	3252	3144	2789	3228	3804	3643
GGTAGACCTCTTCCCCGACCCACC	TRCN0000465530	KLK3	597	728	905	722	550	505	407	598	505	503	421	374	229	455	526	700
TGACTCCTCTATTCTTTGGCACAT	TRCN0000465531	ANKRD13D	1262	909	577	669	996	730	754	846	667	660	1037	612	797	514	711	773
AGGCCTTGCTTATCACTGTCGGAG	TRCN0000465532	NO_MATCH_55	2281	1984	1775	1978	1722	1966	1439	1629	1493	1642	1476	1504	1267	1408	1568	1329
AATTCCCATTGTGATTGGGCCTGC	TRCN0000465533	ZNF101	1555	1129	814	802	1527	1472	1347	1380	1157	1231	912	1205	987	969	1229	1185
GACTCACCTACAGCCCCGATCGCG	TRCN0000465534	AIMP1	4160	3547	2689	3001	3437	3625	3038	3348	3180	3479	2844	2619	2115	2540	2969	2641
GTTGCGGACCGGATACTGGCCCTC	TRCN0000465535	RPL15	2467	2375	2215	2195	2076	2198	2251	1949	1636	2152	2156	2035	1991	1752	1833	1882
TCAAGTTTGCTTCTAAAAGTAATT	TRCN0000465536	ARHGEF10	1493	1283	1168	924	1065	1254	1177	1357	1226	741	1139	853	1098	889	1084	1262
TCAACCGGGCACGCAACGACACAA	TRCN0000465537	GALNT1	4687	4626	4795	4686	3380	3447	3472	4079	2885	3183	3364	3066	2829	2887	3287	3037
AATCGGGACTGATGGGCAGCATGG	TRCN0000465538	VWA5A	944	672	488	495	799	707	866	793	608	651	721	534	594	481	705	711
TAAGCCCCTCGCCTTAATCTTTAC	TRCN0000465539	COQ7	998	1066	860	768	750	840	672	859	682	696	705	692	667	767	740	603
TCCCTCGACAATAACCTACTCAAA	TRCN0000465540	CXXC4	3892	3578	4857	4434	3087	3208	3141	2688	3244	3228	2863	2649	2615	2346	2669	2436
ATTACATGCATGTACGCTATACCG	TRCN0000465541	MRPS24	1343	1097	916	922	1128	1259	1150	1035	1263	1131	1132	1062	1092	1076	963	812
TCAATGTTTCTCCGGTTCTGATCG	TRCN0000465542	SRP54	1154	1216	771	838	937	949	968	796	1145	756	726	703	914	823	963	733
GATCAGGACCTTAGTTCCATGCAC	TRCN0000465543	STAR	1655	1562	1422	1535	1291	1215	1282	1181	1562	980	1392	1100	876	1510	1130	1763
ACATGTAGGAGTATCGATTGTGGC	TRCN0000465545	PEX19	3314	3046	2629	2611	2908	2705	2396	2406	2566	2580	2122	1594	1870	2126	2161	2684
GGTCATCTCACATTTCGTTTGACG	TRCN0000465548	MRPS25	2447	2357	2353	1979	2269	1828	1874	1755	1614	1900	1784	1860	1757	1664	2089	1235
CCCTTAACTCAAGAATGGTATGTG	TRCN0000465549	MLLT10	2719	2802	3230	3529	1962	2282	2114	2214	2092	2292	1863	2019	1775	1938	2135	2329
GCCTACCGAGGCATGCGCGGTGGC	TRCN0000465550	CSTF3	2825	2564	2359	2207	1954	2021	1790	2136	1826	1987	2058	2178	1499	1839	1738	2118
CCTATCATCCAGACGTTTAAGGCG	TRCN0000465551	MDK	2225	2222	2656	2541	1573	1594	1935	1609	1494	1644	1283	1545	1526	1158	1528	1401
GTGGGTCCATGGACACACGCAACC	TRCN0000465552	SERPINB3	1469	1351	1168	971	1329	1157	1571	1074	1261	1192	1039	898	1093	957	1149	1180
CTTCCTCATGCCCGGTCTTACAAT	TRCN0000465553	FANCI	1894	1770	1711	1441	1377	1297	1381	1326	1338	1070	1354	1636	1073	1298	1188	1523
ACCGCACTCGCACGGCGTGGGCAC	TRCN0000465554	FRMPD4	4365	4119	4029	4169	2959	2851	3256	2769	3045	3270	2267	2617	2519	2880	2620	3160
ATCTTTTGACGCACCCCCCGACCC	TRCN0000465556	NO_MATCH_75	858	571	502	480	742	584	618	520	455	637	471	826	567	437	566	561
AGCCCGCTCACATCTTTTAGGTCA	TRCN0000465557	ANGEL2	604	588	435	464	464	381	398	466	617	424	455	300	237	355	388	592
GGAATCCGAAAGTTGTGTGCCAAT	TRCN0000465558	SLCO4A1	1732	1778	778	830	1622	1071	1241	1075	928	1494	840	905	780	1212	882	1032
AACGTCTACCTACTGGCACAAAAC	TRCN0000465559	BAIAP2	452	328	302	236	294	357	397	300	374	361	201	291	251	285	236	291
ACTAGGAGTGACACGACGAAGCGT	TRCN0000465560	ZBTB45	1053	981	804	1015	776	730	528	426	461	589	618	499	541	579	670	472
TTCGTCCCGGCAACTTTGAGGCCC	TRCN0000465561	TAF9B	1617	1333	1085	1091	1357	1218	1189	1327	1180	1334	1067	1094	885	1145	1312	1304
CTCTCCCACCCTTTATCTCAACTC	TRCN0000465562	JAK1	180	130	43	107	133	93	269	131	121	101	233	81	174	150	74	145
AGGCTCCTCGTGCCTCTTTCACAA	TRCN0000465563	ZDHHC7	921	882	640	779	686	833	854	811	621	809	860	547	617	623	595	652
GATCAACGCACAGCAGCTATTTCC	TRCN0000465564	VPS53	15	26	33	12	39	61	14	8	43	26	60	18	0	66	35	1
CCCAAATTCATTTCTTATAAAACC	TRCN0000465565	RIC8A	88	86	58	95	94	87	86	31	57	181	68	47	49	56	71	8
TATGGTTATTATAGCAGACTCGAC	TRCN0000465566	HLA-G	524	418	296	399	383	426	432	271	453	310	243	303	211	225	314	336
CTAAAACCATGTCTCAATATCTTT	TRCN0000465567	NUP37	2412	2273	2374	2032	1894	2221	1883	1828	1641	1648	1437	1314	1395	1699	1792	1777
ACTTCCTGGAGAGGGGCTAACAGT	TRCN0000465568	WBP2NL	3038	2454	1889	1926	1972	2325	2632	2357	2035	2274	2078	2090	1842	2477	1951	2287
ACCTTAGACGCTCCTTTTCGCTGA	TRCN0000465569	TAC1	3844	3413	3313	2845	3003	3152	2908	3153	2837	2886	3375	2780	2132	2878	2791	3019
AAGTGGGAGAGTAAGTGCCTGGTC	TRCN0000465570	PRB4	2021	1715	1718	1544	1699	1652	1705	1378	1549	1439	1274	1255	1233	1434	1220	1411
TGTAGCCATAGAGGTGAGCAAAGG	TRCN0000465571	RND1	2842	2844	3118	3008	1916	1921	1939	2045	1813	1816	1468	1654	1490	1661	1587	2018
GATCAGCCTGATCAAGTAATAAAT	TRCN0000465572	ZFAND5	1685	1739	1780	1587	1760	1299	1448	1472	1524	1460	1364	1176	1285	1212	1403	1371
TCTGCAGTTCTGCTGTCACCGCTA	TRCN0000465573	ING5	2351	2050	1564	1668	1733	1634	1603	1731	1698	1529	1400	1754	1577	1649	1651	1548
CAACATATCGTGCACATGACTGCC	TRCN0000465574	NO_MATCH_83	1445	1341	1607	1577	665	645	792	655	737	786	404	733	602	548	657	889
CCAAGCGACCCTCCATTGGGAGAC	TRCN0000465575	RNFT1	5002	5206	5126	4529	3695	3875	3230	3773	3254	3371	3026	3596	3324	3550	3422	2922
TTCAATATGGCCTGAGTCCGTGCG	TRCN0000465576	VTCN1	2364	2082	1860	2069	1847	1750	1731	1664	1845	1464	1938	1612	1324	1576	2219	1844
TAGCCTGACCTATTGACCCCCAAT	TRCN0000465577	MORN3	2079	1871	3317	1699	1783	1542	1744	1361	1286	1661	1536	1666	1289	1458	1228	1383
TGCATGACACCAAGGCCATCATCG	TRCN0000465578	UTP14A	487	426	397	379	432	190	149	325	446	216	377	240	262	215	187	366
AGACATTCACGATCATTTAAGTCT	TRCN0000465579	MRPS33	3141	2935	3345	3388	2376	2096	2346	2756	2439	2793	2391	1835	2041	2015	1977	1765
TAACTTGACGAAAGGACCCTGTGC	TRCN0000465580	EIF4B	710	735	339	424	641	732	626	461	439	512	464	501	350	560	345	260
GAGGAACTTTTGAAGCTGCAGCAA	TRCN0000465581	HGF	1165	937	812	738	761	620	717	673	836	779	552	581	498	738	741	802
CAAAGCGCTGTATGATGGCGTGGG	TRCN0000465582	AKT2	781	734	799	782	545	496	665	444	476	692	382	589	397	642	534	450
AGTTCATCCGGCCACCCTCAACCA	TRCN0000465583	BUD13	1480	1135	648	611	1435	946	1201	1051	746	571	634	654	747	959	818	623
ACTCTCACTAACTTTTGCATTTCC	TRCN0000465584	ZNF169	241	196	128	127	122	77	120	123	219	167	167	163	137	97	93	106
AGAATCAACACGATTGCACTCCGA	TRCN0000465585	DCLRE1C	112	87	84	110	72	73	97	98	112	47	64	29	55	140	104	58
TGACTTTAATCGCTTTACTTAGAA	TRCN0000465586	ASAP2	10	3	6	17	0	0	0	0	0	0	0	24	43	0	0	22
TGAATTTGTTCTGTCGAGCGCGGC	TRCN0000465587	BYSL	2503	2253	2138	1932	2139	1791	1404	1634	2050	1477	1378	1792	1260	1317	1496	1496
TTTATAATACCACTGGCCCTTGAT	TRCN0000465588	POLH	599	413	244	212	338	491	497	477	392	469	349	493	343	417	460	463
TCGGGACCCTACAGAATTAAACAT	TRCN0000465591	TAF5L	2556	2350	1797	2501	1683	1756	1767	1950	1546	1521	1937	1994	1561	1533	1740	1847
ATCTATTATAGAGTCCCGACGCCC	TRCN0000465592	ADAM30	138	103	54	52	133	134	176	103	125	130	72	32	84	86	101	81
AGTATCACGGCTATGGGTACTGAC	TRCN0000465593	MGAT1	3	3	0	0	0	0	0	0	0	0	0	0	3	0	0	0
GACTAGGTCGTTTTACTTTGCTGT	TRCN0000465594	C1QTNF4	2105	2035	2249	1467	1569	1851	1336	1855	1363	1550	1440	1637	1366	1477	1474	1566
GACCCAACGGCATACCCTTGCCGA	TRCN0000465595	ZC3H11A	1116	920	836	646	864	791	830	653	664	920	642	578	815	559	639	465
CATACGACGACCCCTCAGTGATGG	TRCN0000465597	SNX7	59	71	95	48	35	100	48	66	25	12	20	38	12	47	31	23
AATAGGGTCGGAGACGCTATGTAC	TRCN0000465598	PCNA	10	5	0	15	1	1	0	4	0	0	0	0	28	0	35	25
TTCGGGGGTCGTGACTCGAAGCCC	TRCN0000465599	MRPL16	71	110	76	61	24	273	43	71	69	77	117	51	42	80	118	47
GACCTATTTATTGCTCGGAAATTT	TRCN0000465600	MEI1	224	170	101	87	131	158	142	187	107	141	147	181	191	131	132	55
ATTTGATTAAGAACGGCCCGGTAA	TRCN0000465601	ABT1	778	474	379	329	742	524	558	589	657	636	560	368	509	532	580	847
ACCCGAAAACACTAATTGTTGGCA	TRCN0000465602	SLC25A17	6735	6351	6398	6297	5171	5589	5219	4633	4742	4999	4528	4495	3940	4499	4364	4868
TAACCACCCTTTTATTTACAACGA	TRCN0000465604	GSTM4	1672	1628	1175	1430	1301	1308	1170	1239	1164	944	1234	1162	1043	939	1435	979
CTACAAAATTAGTCGAGAGTACAG	TRCN0000465608	INIP	4037	3939	4491	4180	2881	2638	3078	2746	2610	2493	2434	3096	2633	2555	3039	2735
AATAAATTTCGAACCAGTGAATAT	TRCN0000465609	ATP6V0E2	752	490	411	345	623	469	620	668	550	655	643	524	513	555	536	525
CCTGTACCCGCACTACGTGTTGTA	TRCN0000465610	UCK2	847	825	850	1133	700	651	631	552	614	603	489	418	392	692	561	584
GCAAGATCCGAATCGCGACCCCGG	TRCN0000465611	GNPTG	3089	2857	2344	2246	2559	2429	2102	2092	1909	2232	1999	2344	1992	1723	1783	1987
TACCCCGGGAGATTTTAATAAGAC	TRCN0000465612	EIF4H	4784	4517	3979	4774	2960	3677	3428	3702	2868	3072	3020	3313	3061	2821	2908	2570
CGATCATCGCACGGGACACGTACT	TRCN0000465613	BLCAP	263	270	447	308	228	139	225	77	200	245	93	153	216	172	131	144
CCCGACAGTAGCACTCATTGCTGG	TRCN0000465614	C17orf47	26	6	3	0	8	0	87	0	0	5	6	0	35	7	2	14
TCCCAGAAATACCACCCCCGTACA	TRCN0000465615	SPATA2	65	56	12	20	30	24	0	23	14	6	10	32	7	17	6	0
GCGATCTCTTAACCCCAAGTATGA	TRCN0000465616	MRPL44	839	690	522	506	624	583	629	662	876	551	708	666	454	457	663	743
TAAGAGATCCAGATACTGAGTTCG	TRCN0000465618	MMP2	809	842	459	718	462	556	602	626	560	757	561	469	564	493	446	529
GGATATAACAACTGAGTCGGCTGG	TRCN0000465620	SFN	2594	2495	1635	2530	1861	1945	1742	1676	1736	1839	1716	1720	1532	1792	1420	1910
AACAAAACTCGTAACTTCCCCATC	TRCN0000465621	RPIA	1752	1443	1020	1750	1143	1213	1334	1402	1031	1377	1302	1230	1005	1128	951	1107
TGCCTTCGGTTAAAAAAGCTCTCC	TRCN0000465622	CDX1	1499	1502	1998	1365	991	915	1126	1172	1176	1148	1305	989	1094	726	964	1081
CGGCCCGGGGGTTTCGGCTACCCA	TRCN0000465623	PCDHB11	353	423	407	317	228	183	265	191	299	299	384	277	163	196	166	216
GGTTGCTTGTGCATCGGCGCTTCT	TRCN0000465624	LHFPL4	867	787	746	848	767	771	674	687	852	731	599	613	623	707	665	565
TGATGAGACTCATTATACCTCCAG	TRCN0000465625	PDCD2L	3961	4003	3669	3488	2694	2960	2983	2898	3058	2700	2351	2315	2484	3063	2336	2705
CTGGGTGGGATTCAGCACTTATCT	TRCN0000465626	TROVE2	1188	1106	843	812	952	986	827	867	783	627	621	1137	1043	786	784	977
GGCTTTCACCACGTCGAGGTGCGA	TRCN0000465629	KLHDC9	717	694	625	660	603	558	564	524	660	472	401	685	304	499	495	537
GATCACGGGGCAACCCTTCGATAC	TRCN0000465631	TAOK3	244	268	201	139	183	116	163	111	154	278	110	243	89	115	184	115
GATACCCTCCTCTGCCCGTTCCAC	TRCN0000465632	DDX31	1174	980	404	558	718	795	932	685	908	750	731	805	826	635	637	953
ATGCCCAGAACTTGCATGTCAAAG	TRCN0000465633	TPMT	87	50	78	48	70	46	68	69	52	41	73	50	80	138	104	45
AGCACCTTTTTCTGGCCAACCAGT	TRCN0000465634	SGCZ	3880	3363	3223	2784	2948	2683	2813	2830	3149	2691	2191	2803	2386	2356	2615	2529
GCCCCCCAGGAGACTATCTATCCT	TRCN0000465635	XLOC_l2_009833	4591	4425	5050	3982	3517	3222	3405	3427	3037	3085	2498	2900	2587	3212	3162	3111
GCTAAATAAATTACTAAAGGACGC	TRCN0000465638	ERG	32	22	19	3	40	14	77	30	0	0	1	50	5	17	34	3
ACCTGGATACACCATGGAGCCTGT	TRCN0000465639	KDELC1	26	27	30	17	9	9	38	40	33	14	12	66	14	19	11	1
AGGGGGGCCACCAGTTGCCTGAGG	TRCN0000465640	Prrc2b	3016	2632	2254	2193	1776	2160	2338	2065	1974	1899	1702	1879	1439	1754	1657	2156
ATAACCATTGAGGGTAATTTTTAC	TRCN0000465642	C7orf49	2409	1905	1377	1627	1844	1725	1877	1853	1918	1601	1526	1433	1598	1442	2142	1478
AGCTAGGATTAACCCGATAGTATT	TRCN0000465643	WRAP53	1397	1324	894	1004	1333	1136	959	1121	922	919	854	834	720	803	1346	1050
AGCCTGGACAAAGCTTGTTGCAAA	TRCN0000465644	AAAS	2487	2473	1529	2000	1872	1872	1803	1598	1677	1917	1320	1424	1237	1167	1540	1483
ATATGAATTGTTTCGATTTCCCGC	TRCN0000465645	ATP1B2	712	511	376	421	579	758	663	424	359	553	446	351	456	389	422	524
TTCTAAGGCGATGGCTCCTTCTAA	TRCN0000465646	AVIL	558	467	269	256	493	493	561	349	472	486	322	264	289	313	450	376
CCAGCAATTCATGAAATTGACCTA	TRCN0000465647	MKRN3	3240	3151	3827	3112	2006	2253	2462	2433	1895	1781	1932	2262	1799	2169	2318	1962
CAGCGGCAAACTCAGCTGAACCGA	TRCN0000465648	TMEM14B	2603	2721	3341	3177	2235	2320	1792	2126	2292	2101	1572	1933	1881	1846	1607	2062
CCATCATTCCCGACTGACCGATCC	TRCN0000465649	HAVCR1	2491	2550	2821	2462	1992	1728	1767	1908	1431	1427	1472	1943	1437	1487	1945	1523
GTCAAGCACAGCGTGAGCCTTCCG	TRCN0000465650	FASTK	1214	1041	698	856	1038	1070	836	743	745	854	651	699	821	620	844	627
CTCAGCCCGCGGGGGATATCACAT	TRCN0000465651	SLC41A3	1524	1540	1539	1218	1014	1130	1244	1150	740	1100	652	959	825	1224	864	1188
GCTCACAACTCTGGCGTCCAACTT	TRCN0000465654	FERD3L	923	708	342	499	488	373	435	458	361	603	561	526	472	683	402	352
GGACAAACTCAGCTAAATGCAGTC	TRCN0000465656	PRRT2	1801	1905	1441	1095	974	1202	740	996	1166	1581	1443	1164	1002	989	779	1237
GCTCACAGAACCAACCGTATTATC	TRCN0000465657	BVES	1669	1620	1467	1481	1514	1598	1199	1310	1610	1118	1188	1330	1167	1655	1090	1632
TCACGGTGTCGTACACAATTGAAG	TRCN0000465658	FGGY	1106	1264	866	1118	925	595	1155	752	797	709	1055	638	670	855	1399	856
GTACCCTAGGTCAATGATCGGCAG	TRCN0000465659	SH3RF2	3577	3246	2886	3041	2666	2894	2798	2319	3666	2766	2368	2299	2357	2334	2419	2346
CTCAGGGGGATAACCCCGGCGACT	TRCN0000465660	SURF1	2444	2289	2788	1636	1770	1833	1845	1632	1370	1476	1460	1571	1472	1284	1569	1620
CGCGGCTGACCCGATGTCTGCTGA	TRCN0000465661	NSMF	3161	3433	2784	3933	1799	1833	2166	2385	1935	1458	1763	2400	1560	1920	1764	1696
GCTGTTGGAATTCATGAGATCTTT	TRCN0000465662	CNBD2	3641	3640	2330	3112	2690	3198	2525	3015	2978	2679	2850	2364	2346	3045	2915	2860
TATCAAGGGATTTCACCCCGGACT	TRCN0000465663	MIA2	1331	1330	761	624	1092	1244	1145	963	787	879	871	725	674	755	831	1090
CGTAACAATTTGATCTACACTAGA	TRCN0000465664	KRTAP13-3	1271	1208	1615	1259	725	892	1001	931	681	478	752	755	596	742	886	950
AAACGACCTCCGCTAAAGCCTCCC	TRCN0000465665	BTBD10	811	544	436	364	588	627	567	557	446	751	592	453	407	530	457	661
TAGCACATGCAACGTATCATCTAT	TRCN0000465666	CA11	976	942	988	1069	730	542	521	611	689	509	533	497	453	717	611	642
GGTGTCTAATCGGGGCTCTAGGGC	TRCN0000465667	FAM127B	2498	2267	2536	1978	1596	1738	1525	1654	1532	1737	1346	1648	1299	1851	1460	1773
TAATGTTGACCACCACCGTGTAGT	TRCN0000465668	AGBL4	2552	2253	1897	1913	1751	2013	1361	1899	1896	1670	1937	1638	1609	1227	1382	1714
CCATAGACATCCCTATGACCTCGA	TRCN0000465671	GSTT1	1910	2233	2105	2073	1600	1621	1428	1740	1045	1623	1649	1477	1115	1231	1074	1642
CGGCTGATCTACTGCGTCGCGACC	TRCN0000465672	TSGA10IP	1559	1674	1155	1342	1029	726	1136	716	892	837	645	782	654	874	836	672
AAAGGGTATCAGTCACCATAACAA	TRCN0000465673	RSRC1	920	835	443	500	721	640	774	742	497	734	739	819	504	701	682	709
TATCTAACCTTTAGAGGGCCCGGT	TRCN0000465674	MIA3	1662	1292	978	841	992	1028	1417	1384	1370	1186	1128	1089	760	1230	1142	1080
CGAGCGAGTAACCTACACAGGACT	TRCN0000465675	SIAH1	4169	4854	5215	5438	3113	3537	3334	3226	3149	3104	3204	2703	2539	2941	2796	2385
TGCATATTGTGGGCGCGACGGAGA	TRCN0000465676	GIT2	965	1038	973	838	681	647	523	531	1102	553	497	588	728	507	487	543
AGGGAGGGCTGTGTATCCCAGTCC	TRCN0000465677	IL1RN	2430	2223	2060	2723	1753	1845	1867	1520	1495	1652	1241	1563	1315	1858	1412	1439
GCGGCTCTTCTGGTCATCTGTGAC	TRCN0000465678	NO_MATCH_179	5947	5159	5623	4988	4197	3840	4258	4358	4714	4283	3766	3580	3441	3727	3732	4246
TCGCTACTTCAGTTCATAAGCTTC	TRCN0000465679	NO_MATCH_249	358	317	232	200	153	208	144	413	255	540	241	342	207	203	377	393
AGGTGACCTATTCTTTCAGAAATC	TRCN0000465680	MAP2K5	520	491	340	544	520	321	604	376	285	256	242	331	375	389	499	374
TTAAGCGTGATTTTCCCGCTTAAG	TRCN0000465681	HSD17B11	2454	2058	1576	1656	1732	1906	1828	1776	2082	1723	1625	1837	1458	1635	1586	1937
CTTTAAGCTTCCTATTATTTTTTT	TRCN0000465682	ETFDH	374	374	139	194	380	247	280	176	331	220	344	142	289	368	223	236
ACTTACTGTGCAGACAAGGGAAAC	TRCN0000465683	ADCK4	244	203	118	132	143	254	190	160	145	155	124	183	81	137	112	62
CTGAATCTTTTTCCTGAGTGGAGG	TRCN0000465684	TRMT6	51	65	42	11	47	36	24	2	25	21	64	14	77	8	62	27
TTTTCCTTCCTAATCTATAGCCTT	TRCN0000465685	GAPDH	426	294	153	222	353	358	338	269	356	322	282	307	216	319	431	441
AGCAGTTTCAACGATAGCCTATCT	TRCN0000465686	LOC101928751	4637	4130	4256	4377	3745	3255	3101	3412	2944	2905	2723	2768	3046	2543	2800	3271
ATGGATTGAAGTGGTTCCCTTGCA	TRCN0000465687	TMEM47	1285	973	1078	945	854	754	949	932	990	1025	850	725	722	986	770	963
CACCGACAGTTACGCGATTAAATA	TRCN0000465688	NO_MATCH_86	4022	4448	4499	4358	3102	2772	2954	2944	2756	2822	2750	2614	2323	2610	2582	2926
TGACCGAAAAAAAATTTTTCGTTT	TRCN0000465689	MAP2K2	1317	1313	1347	1159	921	808	771	953	786	873	724	986	780	1069	818	771
TCGTGTACACTAATTCAACAAATA	TRCN0000465690	SNX14	442	356	165	245	477	365	322	263	383	247	419	282	249	445	266	167
CGTATACTATCCAATCCCGAATTC	TRCN0000465692	KIF26A	2973	3237	3245	3278	2248	1907	2387	2114	2135	2260	1955	1901	1765	1748	2065	2000
ATCCAGTAGGCGATACGATATAGC	TRCN0000465693	C2orf15	1273	1131	872	768	985	933	1068	996	865	810	753	869	677	814	879	1053
CGGCCTGCCCCGTCGATACGATCA	TRCN0000465694	Gclc	619	438	386	364	437	434	381	345	383	296	382	355	307	502	407	319
GACTAAAGGTCGTCCTACCGATTA	TRCN0000465695	GRAMD1B	11	13	4	1	6	28	28	10	0	34	1	0	0	0	5	3
TGTGCTCACGCCAAATTCGGGCAG	TRCN0000465696	NDN	42	43	43	46	15	34	47	31	14	50	13	26	7	7	18	29
CCCGGGGAGAGCGAACGCCGAATC	TRCN0000465697	ENKUR	1126	1472	1395	1323	767	1051	899	1060	1136	833	847	921	578	910	869	922
AATCCAATCATATAGCAACACCGG	TRCN0000465698	ZNF329	252	191	153	139	260	234	225	253	322	266	181	125	187	145	123	237
CAGTTAAAACCCGCCCAATTCCAA	TRCN0000465699	PRR16	3441	3305	3136	3456	2471	2579	2380	2798	2472	2228	2075	2511	2064	2305	2394	2442
GCCTTCAATGGAATTGCATCAATC	TRCN0000465700	ZKSCAN4	1165	1104	709	732	849	850	917	849	860	1041	583	967	750	552	654	868
TCAATTTGCCATGGTTGCTACTTT	TRCN0000465701	HARS	884	870	637	631	746	702	813	524	688	833	795	676	353	865	679	661
ACTGAATACAGCAGCCGCTCATCC	TRCN0000465702	RPL3	862	801	337	242	763	500	622	706	789	751	637	576	803	672	723	840
AAGCTGGGATTACTTCTGTACGGC	TRCN0000465703	EEF1G	1577	1424	1055	928	1361	1438	1492	1506	1247	928	1378	1181	1024	1117	1315	1263
AGTTGCTCGGTCCCTCTCATGAGT	TRCN0000465704	ERICH6	2541	2077	1430	1556	1637	1961	2039	1792	1769	1607	1595	1463	1666	1636	1769	2100
CTCAGGCAAGTTTACGCTTGATTT	TRCN0000465705	LHFPL5	4609	4719	4656	4381	3489	3718	3276	3346	3261	3048	3428	3380	2842	2987	2945	3556
TCCGATATATCCAATCTGGCCCCT	TRCN0000465706	CALML3	3162	2982	3384	2752	2237	1925	2272	2457	2457	2334	2241	2547	1940	1866	2049	1925
ATTTAAAGGTTACAATCGGCATGT	TRCN0000465707	TMED5	74	81	41	39	48	69	35	45	28	70	46	50	35	26	25	31
ACATTACCATATTGCCCGAATTGG	TRCN0000465708	TBRG1	6430	5563	5313	5728	4623	5013	4804	4999	4663	4658	3754	4999	3971	4158	4200	4440
CGCACAGAACACGACCTTCACGCA	TRCN0000465709	CDC16	0	1	0	0	0	10	0	0	0	0	11	0	0	0	0	0
TTTCGGTCGAACATAGACGACCGG	TRCN0000465710	SMAD2	1093	845	646	692	705	1093	1060	844	957	797	705	769	594	861	796	768
AACAGCGACCCTGCGCGTTGAAAC	TRCN0000465711	RRAGA	1778	1405	1150	1599	1321	1315	1450	1167	1353	1017	1151	1268	887	938	1283	1232
TCAATCCGACATCGTTCGTCCGCT	TRCN0000465712	GNGT1	1741	1559	1794	1524	1163	1082	1262	998	1155	944	906	928	967	1132	1042	1047
TATAGTTTGTCCTTGCTAAACACC	TRCN0000465713	INVS	2528	2197	2432	2020	1679	1971	1820	2208	1563	1689	1975	1792	1541	1621	1709	1377
TCCACCTTGAATTAAACTATCGAT	TRCN0000465714	SMIM19	1374	1165	1334	1263	1021	1066	1033	1119	937	1036	814	1002	924	929	1018	827
CAGCATGCTCTGCGTCTCATCCAG	TRCN0000465715	ABHD17A	1751	1574	1827	1551	869	1052	1349	1158	1220	1171	1156	1021	780	745	876	821
CCCGCTAGCACTCTAGGATCTGGA	TRCN0000465716	TP53BP1	5913	6578	6767	6312	4319	4417	4728	4887	4034	4157	4180	3813	3944	4104	4349	3939
TCGTTCTATACCCGCCGCTGGTTG	TRCN0000465718	HAT1	83	69	14	74	35	39	97	134	7	59	38	17	71	23	52	92
ACTGCGGCTGATCAGATCCCCAGG	TRCN0000465719	MEIS2	1544	1450	560	509	1258	1267	1054	1028	1104	879	982	1034	871	945	1235	1460
TGTTGTTCGTTATACTAAATGTCT	TRCN0000465721	RPL32	2044	2322	2248	1699	1503	2194	1772	1530	1937	1866	1743	1488	1848	1709	1423	1699
GGGTTTTAACGACCCCGTAGCAAT	TRCN0000465722	ANKRD50	1295	995	866	596	1226	716	1276	784	801	700	672	505	625	620	650	729
TGACCGAGTATAGGCAGTCTTGGC	TRCN0000465724	ACAA2	898	770	609	661	627	650	816	526	784	420	736	527	553	450	574	482
ATCCGGATAACGGGAAGACTTAAT	TRCN0000465725	ZMYM1	599	445	324	229	390	511	471	340	296	579	415	539	451	354	342	312
TTTTCTCCCGAAAAATCGGCTAGC	TRCN0000465727	CRYGB	1874	1344	1354	1043	1531	1698	1752	1525	1658	1511	1403	1532	1247	1481	1525	1638
CACTTTCGTGCTTTGAAGCACGGT	TRCN0000465728	MED20	161	112	100	53	55	93	144	66	98	94	154	43	84	65	50	33
AAACCAAGTACTCCTGGCATAGAG	TRCN0000465729	CBX7	580	499	280	411	384	518	478	572	489	643	492	355	353	476	373	486
TCAGTGCTGGGTAACATGTGAAAG	TRCN0000465731	C3orf38	368	387	289	358	302	217	330	430	291	166	137	316	348	335	351	193
TCTTGTGTCTTTCCGTAGTGTCGA	TRCN0000465732	HMG20B	1543	1473	1165	1124	1083	1165	978	904	1301	1186	825	793	855	1061	921	733
GTCATCTTCTTCCTGACTGTTAAT	TRCN0000465733	YIPF1	2079	1656	1749	1427	2277	1647	1780	1613	1747	1778	1611	1558	1592	1758	1588	1363
GCACCTTCAATCCTCGCTCCCGTT	TRCN0000465734	SLC27A4	716	649	586	528	545	577	641	654	634	588	515	389	659	575	364	589
TGTTTTTCCAGAATCTCGGCATTG	TRCN0000465735	NO_MATCH_283	3236	2983	2600	2788	2251	2424	2248	2423	2059	2442	2109	2540	1751	2186	2576	1993
GATTACCTTCAGGCTCCGGTCCCC	TRCN0000465736	NO_MATCH_167	2762	2413	2255	2083	2650	2010	2211	2352	2166	1955	2340	2054	1809	2118	1950	2332
GGCATCCGACAGGTTCTCTTAACC	TRCN0000465737	ACVR1B	163	157	59	141	135	63	42	201	56	100	64	114	100	127	155	35
CCAAAATCATTATGGCTTATTATG	TRCN0000465738	NO_MATCH_103	4601	4667	5137	4934	3308	3153	2865	3117	3128	2971	2936	2688	2885	2350	2869	2597
TTTGCAAGGTCCGTGACCGAGTTC	TRCN0000465739	SH3BGRL	1260	974	1183	882	936	976	789	811	874	922	943	789	813	881	861	989
AGTTCAGTACTGAACTCTGTCGGA	TRCN0000465741	MRPL57	766	692	580	668	718	603	539	605	639	625	458	478	459	653	766	599
CAAAGGCCTAAGAGGACAGAGAGT	TRCN0000465742	ORAI1	2259	2548	2112	2345	1844	1683	1620	1700	2008	1862	1591	1421	1344	1390	1869	1282
TGATCTGGAGCCTATCTTGACCAT	TRCN0000465743	SPHKAP	91	98	66	34	78	61	42	47	102	140	18	34	8	62	56	59
CAGGGTCGTTTCACTCCGCTAAAC	TRCN0000465744	PNLIPRP3	886	824	579	659	608	762	719	719	628	575	438	717	555	612	566	582
ATAAGATTGTCACCCAAGGAATCA	TRCN0000465745	RPL13	1853	1391	1029	1204	1285	1247	1310	1252	1159	1208	1209	1109	922	1066	1209	1121
GTATTTCCGCGAATCGGGTCGGAG	TRCN0000465747	HIST1H4C	315	262	180	187	259	250	196	187	131	165	139	173	212	174	219	127
CGGTTCTCTACCTAGACCACAACC	TRCN0000465748	OSER1	2002	2151	1874	2031	1349	1288	1431	1211	1465	1205	982	1863	1057	1280	1161	1173
TCGGTGCGACCACCAACACATAGC	TRCN0000465749	CWF19L1	656	545	479	476	547	450	371	257	396	313	321	338	425	443	409	236
CAATCGATTGGTATATCGAAATTC	TRCN0000465750	USH1C	606	541	501	402	515	369	660	289	489	372	301	546	306	368	189	301
CAACCTGAGAGTGTTGACCGAAGA	TRCN0000465751	C14orf79	4241	4201	4464	4772	3151	2879	2842	2945	2542	3166	2896	3138	2483	2535	2647	2831
ACTCTCAGAAAAGATCATCAACTC	TRCN0000465752	NDUFB1	2497	2224	1939	2024	2020	1835	1923	1935	2139	1620	1725	1671	1318	1736	1944	1774
CTGCTGCGTTCCGGAACTCCGTTT	TRCN0000465753	REEP1	2811	2747	2757	2397	2082	2073	2218	2212	2560	2207	2017	2266	1775	1987	1980	2051
ATAGTACTCACGTATTTCCTGATG	TRCN0000465754	MFAP4	1566	1376	1150	1112	1132	1222	1229	1168	1382	1106	1150	1305	1104	862	1054	922
CGACTCTACAACCGTGCCGCCGCT	TRCN0000465755	HIST1H1A	4774	5082	4763	5990	3267	3388	2882	3409	3177	3245	2923	2629	2896	3297	3328	3095
TCTCTTCCTTGCCTCAATGCAACA	TRCN0000465756	RDH11	403	348	319	321	276	335	327	293	368	381	306	287	188	312	213	339
TTCGTGCACGGCGTCCGCCCGGGT	TRCN0000465757	C11orf45	6506	5621	5579	6069	4594	4766	4417	4851	5152	4451	4361	4775	3756	4368	4151	3858
CACGTAATGAGGTCTGCATAATCT	TRCN0000465758	NTF3	7386	7363	7056	7127	5176	5555	4957	4791	5191	5372	4784	5260	4451	4176	5037	4316
CGCCTGCGCACATCACTACTGGCC	TRCN0000465759	KCTD19	1241	1216	849	1136	734	910	980	752	834	953	787	938	706	764	610	648
CCATCGCCATTCATCGTGCCCCGC	TRCN0000465760	PAPSS1	673	797	561	594	558	326	529	507	501	402	502	627	405	299	404	483
GGTATCCGCGATAGTTCGACGGTA	TRCN0000465761	GTF3C5	122	144	52	84	80	115	49	75	195	82	40	45	57	109	95	64
GCACCCCCAGGAGACCTCCGTCGG	TRCN0000465762	RNASET2	2024	1695	1642	1356	1300	1685	1589	1606	1653	1425	1423	1426	1318	1146	1214	1076
AGGGTAACTTACCGACTCCGGGCT	TRCN0000465763	PGC	4176	3764	3337	3360	2994	2521	2569	3195	2683	3349	2496	2588	2169	2687	2975	2663
AATGCTAGACATCCAAGGCAATTT	TRCN0000465764	PDE6H	1328	991	786	812	1795	943	945	1006	903	999	876	737	1340	838	876	932
CTTATAACTCTGCTTACGCATACA	TRCN0000465765	C7orf25	1273	1109	1128	1088	1065	979	934	1119	945	919	1065	879	777	836	998	580
GAACCAGACCACCAAATATCCTTA	TRCN0000465766	SH3GLB1	1824	1873	1547	1584	1287	1721	1387	1568	1491	1202	1429	1296	1006	1469	1252	1282
CTTCAACTGATCTACACCTCTTAT	TRCN0000465767	KLHL14	1008	904	1009	748	659	601	707	670	692	666	568	686	813	522	674	803
TGTTCATCCGGCATGCGCCTTGCG	TRCN0000465768	LOC146880	3307	3170	2970	3365	2572	2526	2179	2530	2064	2270	2010	1776	1836	2129	2241	1871
GCGACGTTTCATCACCCAGACTTT	TRCN0000465769	ZNF468	2780	2327	2320	2215	2265	1830	2065	2100	2167	2057	1740	1723	1282	1574	1822	2251
ACATTGCAGAAACTAGATCAATGC	TRCN0000465770	FXN	2025	1763	1857	1865	1410	1287	1260	1301	1591	1245	1308	1140	1072	1275	1155	1027
TGCGTTTGTACAGCTTGTTCGCGT	TRCN0000465771	HDDC3	2062	2242	2562	1984	1669	1218	1585	1659	1505	1480	1320	1236	1193	1155	1253	1266
AATCGTTACTAGACGAATTGACAA	TRCN0000465772	MTAP	1743	1262	925	1043	1325	1322	1257	1347	1276	1261	1353	1309	1019	1264	1466	1128
CGAAGGAGGAAGAATAATTGACTA	TRCN0000465773	FOXS1	8259	10027	10871	10493	6043	6441	5858	6233	6733	4989	4545	4924	5143	5258	5536	5122
CCGCGAGTGGATACGCACCAGCGC	TRCN0000465774	ST8SIA2	7848	7742	7359	6741	5335	5345	5764	5650	4785	5153	4985	5265	4998	4470	4948	4470
CTCCCTTCCAGCCCTTGCCGGGAG	TRCN0000465775	ERLIN2	1839	1816	1939	1903	1334	1419	1335	1510	1302	1417	1545	1422	1348	1280	1445	1467
CTAAGCTAAGTTTCGTGCCGGAGG	TRCN0000465777	ART3	48	43	9	79	61	6	73	22	85	62	0	0	134	65	18	11
TTTGTATTCAGGTCAAGATGTTAC	TRCN0000465778	C11orf53	2669	1965	1765	1739	2210	2017	1821	2087	1796	1822	1958	1909	1635	1848	1958	1914
TCGGGCCACGCGAGTTACTGATTG	TRCN0000465779	GSG1	1172	1039	984	1037	738	843	541	589	632	568	612	683	583	581	753	574
ATGCAGTAGCTTGCCTTGGTCCCG	TRCN0000465780	RPS27	705	647	639	520	568	549	545	551	416	456	575	402	473	540	337	380
CCCGCTCTGTGTCGGCCCGTCTAC	TRCN0000465781	SLC25A43	380	320	258	222	270	268	238	312	245	210	262	242	207	192	217	249
CCCACAAGCCCAAGACATCACTGC	TRCN0000465782	EIF4EBP2	4314	4640	4499	5445	2929	3145	2909	2902	2656	2889	2973	2779	2771	2911	2929	3206
GCATCGTGTCAGTGCTCCTGTGTA	TRCN0000465783	PIAS3	2563	2339	1867	1677	1692	1687	2081	1642	1682	1709	1526	1331	1347	1739	1474	1630
GGATTTTCTGAACATAACCACACT	TRCN0000465784	PPP1R18	1328	970	593	931	834	957	730	794	882	553	859	680	695	891	647	865
CACCTTCTATTATGAAAACCCCTT	TRCN0000465785	GYPB	241	228	191	263	142	146	172	130	153	122	177	236	164	140	148	84
TGTCTCCGTTCACACTTGATGTGA	TRCN0000465786	CBX6	791	681	1000	724	469	389	346	434	404	298	503	311	256	443	451	358
GGAACCTTAGAGGTTGTACTTGTC	TRCN0000465787	P2RY2	1168	1043	215	319	785	557	916	614	646	541	846	841	590	775	725	776
ATTTCATTACTAATATTCAGCCAT	TRCN0000465790	ZNF695	1295	916	619	687	1090	1096	1332	1234	1119	1104	1172	1010	999	1057	1050	1098
CCTTCTTTCCCTGAGATTACTTGT	TRCN0000465791	CCDC50	1306	1313	1116	998	931	780	971	878	891	939	907	878	984	1187	783	1009
GTGGAGCCAGTCCTACCCGTGGCC	TRCN0000465792	CYB5D2	2134	1906	1951	1668	1640	1605	1886	1360	1458	1430	1504	1421	1451	1466	1497	1502
GGGGTGTCAGGAAGGGTTCCCTTT	TRCN0000465793	ZPBP2	723	531	390	417	592	475	568	487	555	662	402	435	478	490	485	353
CGTCGTATTTGTTCATTACAGATA	TRCN0000465794	BCHE	1859	1776	1031	1579	1245	1280	1167	1054	1063	1228	1209	938	1198	860	975	1222
TGGAGCTAATCATGCTGTACACGC	TRCN0000465795	PTPLA	1886	1861	2399	1966	1162	1467	1479	1249	1107	1302	1245	1128	1054	1134	1040	1007
ATACCGATCTTGGGCTGATGTGGC	TRCN0000465796	PSMC1	1559	1192	964	1008	1217	1285	1206	1010	1020	743	767	816	1146	918	916	967
TGTGGACAGGTCCTGGGGGCTTTC	TRCN0000465797	SLAMF1	6193	6151	6350	6239	4193	4946	4053	4302	3958	4210	3741	3746	3467	3543	3803	3529
CGAATTTTGTGATTCTGCTGAGTT	TRCN0000465798	UBL4B	1874	2173	1907	2328	1390	1404	1242	1419	1458	1366	1330	1124	1164	1396	1142	1389
ACTCGATTCGCGATAATTTCACCG	TRCN0000465799	NO_MATCH_38	5339	4724	4764	4438	4203	4530	3947	4080	3942	3503	3587	3920	3390	3475	3346	3795
AGTAAAAAACAGCTTATAAACCTC	TRCN0000465801	ZNF317	6	8	0	0	0	0	0	0	0	0	0	0	0	1	0	0
TAGGGGTGAACGCGAGCCTTCACG	TRCN0000465802	CYP19A1	45	57	23	58	41	106	9	13	53	47	37	0	5	69	61	16
ATGTTGCTTGATGAAGCCAGGCTC	TRCN0000465803	SPATA6	26	30	25	23	7	27	58	46	57	41	4	2	32	11	4	18
GGGGAATAGCATAGACGTCTGAAA	TRCN0000465804	GNG5	0	0	0	0	0	0	0	0	0	0	0	0	0	0	0	0
GAAAACATACACAAGTGTTAAGTA	TRCN0000465805	ZFP36	2079	1799	1559	1190	1700	1583	1769	1493	1309	1577	1200	1504	957	1232	1270	1445
GCCCCCCATACACAAGTGACTCCA	TRCN0000465807	PNCK	929	819	703	1022	471	612	503	529	558	561	503	496	515	615	525	467
TTCCCTACTGCATCTTGACCGTGA	TRCN0000465808	EIF2B4	404	423	328	307	348	435	334	278	273	464	276	432	280	240	236	209
TCTGATGACATGGCTGAGCTTGGT	TRCN0000465809	NAT14	1261	1361	1742	1650	594	760	849	828	677	707	748	604	709	557	826	833
ATACCTTGAAAATTCGGAATATGT	TRCN0000465810	CHCHD2	2266	1999	1790	1623	1809	1759	1624	1933	1738	1544	1985	1749	1601	1532	1489	1965
ATATCTGGTCCATGAATATCTTTC	TRCN0000465811	LRRC61	1433	1180	1031	909	1362	1090	1132	928	1228	1082	897	1118	1100	1119	1056	1405
CACCCCTCAGCTCAGTCGCCGATC	TRCN0000465812	DAXX	657	612	714	472	395	360	248	406	412	409	324	199	292	311	505	372
GTTACTCAGGCAAATCTAAGTTAT	TRCN0000465813	KRTAP19-1	984	794	747	592	846	746	709	923	677	792	634	597	613	585	790	735
ACTTAAGAACTGACTCACTTATAC	TRCN0000465814	XLOC_009028	861	683	497	673	621	519	562	520	458	466	296	414	636	475	615	722
TCAACCCTCCTCCCTGCCTTACCC	TRCN0000465815	HAUS8	2464	2301	1887	2098	1723	1825	1953	1619	1740	1527	1582	1332	1226	1546	1648	1655
ACGCTCCGACACAGCGGGAGACCT	TRCN0000465816	VCY	2866	2577	2424	2582	2475	1978	2139	1865	1921	1840	1900	1703	1630	1714	1857	1760
ACGCGACGGGTCAACGCCGTATCC	TRCN0000465817	WDR76	661	619	561	497	432	455	513	622	563	466	294	319	393	450	381	512
CAACAGGACTGTTGGACGCTCACC	TRCN0000465818	BBS5	2817	2913	2264	2627	2179	1779	2098	1935	1990	2383	1844	2439	1380	1288	1974	2452
ACTCATCGTGCATCACCAGACCCT	TRCN0000465819	CLEC2D	2942	2385	2549	2114	2161	1783	2498	2057	2001	1874	1849	1946	1997	1888	1869	1974
TTCTAATCCAAGTCATCCATAGCT	TRCN0000465820	FAM160B1	707	482	282	242	402	512	431	417	558	297	508	501	522	426	462	635
ACCGACGCATGTGACATACGACTG	TRCN0000465821	CERS3	2316	1879	1812	1487	1597	1521	1418	1446	1552	1230	1250	1706	821	1315	1340	1425
CTCTAAGCGAGGCTGTCCCCTTAA	TRCN0000465822	C1QB	1229	1171	952	997	991	880	772	831	892	816	897	913	748	825	894	894
AGATATATCGTTTCAACCCTCACC	TRCN0000465823	NO_MATCH_47	781	739	591	590	484	489	781	597	489	685	529	414	479	630	699	501
GTATCACGCCGGCCAATCATCGGC	TRCN0000465824	AANAT	1463	1178	987	1184	1207	960	1169	1113	714	960	930	975	989	798	772	959
GCGTCCCAGAGCGCATCTACATGG	TRCN0000465825	SPESP1	469	421	467	365	441	330	491	380	518	403	274	329	234	413	458	376
GCACAAGACTGCGTGCGGCTCAGA	TRCN0000465826	GSPT2	1482	1488	892	823	1062	1110	1117	718	998	893	756	735	975	691	770	1305
TTAGACAAGAGATTTTGGCTGACA	TRCN0000465827	DNAJB6	33	29	2	14	46	1	0	44	56	11	19	10	16	10	19	18
CCCTACCTAGCGGGTCATGTGAGA	TRCN0000465829	ZSCAN12	23	27	45	15	2	39	0	2	0	0	23	4	26	8	23	0
AAGGACGGCCAGCCGTTGAGTTGG	TRCN0000465830	XLOC_l2_014086	309	215	213	170	185	269	246	186	149	252	167	217	183	238	217	186
CGACGACCCGGGAATTGTCAGCCC	TRCN0000465831	DPP8	1021	973	824	804	568	587	858	678	589	699	527	463	613	601	281	623
GAAATAGCTCGTGCACACTAACCA	TRCN0000465832	SFRP2	2379	1998	1333	1369	1566	1818	1813	1878	1378	1851	1755	1833	1600	1533	1586	1625
AACACTTAGCGCTCAAGGTAGGTC	TRCN0000465833	TMEM14B	1010	875	654	837	847	954	886	916	754	743	881	701	646	755	563	643
TTTAGGACTAAAAGTTTGTCTACT	TRCN0000465834	RPS19	1835	1716	1601	1319	1380	1365	1817	1498	1603	1644	1090	1464	1203	1474	1483	1589
CTACTCTTTCTCCTAACTGGGATG	TRCN0000465835	ENSA	4319	3841	4137	3872	2594	2701	2643	3251	3504	2803	3251	3025	2869	2305	2691	2683
GCCGCGATCCGTACCATGCAACGT	TRCN0000465836	PTRHD1	4157	3884	3430	3468	2899	2826	3152	2971	2717	2969	2873	3005	2449	2928	2932	3355
CATTGACCAAATGTATTGTGCGCG	TRCN0000465837	XLOC_l2_015213	3428	3408	3897	3462	2600	2343	2286	2298	1979	3128	1706	2296	1712	1921	2078	2457
ATGGTTCCGCCAAACGTGCTTTTC	TRCN0000465838	GIF	1261	1038	850	829	1175	818	1231	903	1069	890	743	1009	944	812	927	956
ATATTCTCGCTCGCTTACTTGGGA	TRCN0000465840	ALMS1P	782	590	484	445	610	634	606	603	686	568	618	695	525	523	557	589
ACCCTAGGACTAGCTCCCCAAACC	TRCN0000465841	UQCRB	712	741	687	899	805	380	570	585	678	488	584	411	692	441	506	520
GAGGCAGATTAAAGCATGGCATAC	TRCN0000465842	CISD1	1550	1570	1509	1881	1196	1312	1453	1523	1120	1176	1315	1277	1045	891	1244	1390
CGAACACCGACTGTTCTGACATTC	TRCN0000465844	DEFB104A	8048	8891	10449	9978	5310	5412	5043	5830	5878	5495	4835	5344	4715	4554	4224	4847
GATAAATTAACAAATTCACTATGT	TRCN0000465845	GGPS1	2310	1831	1509	1573	1674	1581	1843	1864	2354	1455	1605	1602	1446	1602	1557	1989
CTCCGGAATGAATTCCATTAGAAA	TRCN0000465846	PCDHB16	865	760	446	688	545	631	477	529	585	585	398	608	590	524	403	475
AGCCATCATACTTAGTTCCACCGC	TRCN0000465847	MRPL21	2596	2359	2322	2209	2075	1968	2060	2208	2119	1977	1727	1446	1887	1867	1904	1878
TGACTAAATTTTATTATAACCCGG	TRCN0000465848	GPR157	2783	2867	2956	2718	2215	1899	1991	2064	2076	1962	1741	1899	1414	2025	1974	1982
AGTTCACTATCAATGTATGGCTTT	TRCN0000465850	PSMC5	1265	1049	677	752	709	1254	957	1098	1091	723	693	854	659	833	887	765
CTCTCCCGCTAGCACTGCACCTCA	TRCN0000465851	40606	1200	1218	1154	1137	947	1056	907	906	833	848	1154	919	870	601	933	746
CATAGTAGCGCACTACAGTTTAGC	TRCN0000465852	REEP6	928	903	1076	888	759	901	832	737	624	801	578	694	776	725	628	848
ACGCTTACCGCACCAGTAAGAATT	TRCN0000465853	TRIM43	2240	2238	1356	1631	2049	1598	1895	1896	2054	1687	1983	1342	1350	1454	1407	1662
GCCATTTCAGTCTTGAGAGTGACG	TRCN0000465854	CCL2	1881	1928	2169	1652	1528	1404	1573	1489	1411	1470	1377	1183	1391	1200	1488	1547
TCATACGATCATAGCGAAGCCTTT	TRCN0000465855	UBE2Q1	2527	2347	2408	2460	2144	1895	1584	1871	1762	1576	1443	1897	1487	1793	1338	1869
AGGATCTGTGCCCGTCGTTCTCTC	TRCN0000465856	ISM2	0	0	0	0	0	0	0	0	0	0	0	0	0	0	0	0
AGTAAGTGAGGGAGAAATAGGCCC	TRCN0000465857	NO_MATCH_56	360	358	294	329	302	374	306	330	295	419	275	268	300	256	351	211
TCATCAAGTAATTAGGGTCGGTTC	TRCN0000465858	HIST1H1T	3871	3402	3191	2969	3133	3086	3148	2788	3004	2787	3088	2737	2459	2156	2926	3101
CCTGATTCTTCAATATCCATGTAT	TRCN0000465859	KTI12	3695	3623	3835	2933	2552	2559	2347	2693	2981	2383	2598	2269	2080	1871	2844	2933
TTATTTGGGAGCACATGAATTCAA	TRCN0000465860	HEATR9	4671	3790	3447	3645	3684	4042	3466	3496	3594	3295	3330	3228	3024	3594	2866	3540
ACCTATGGCCATGGACCGGCTGAA	TRCN0000465861	P3H2	1338	1220	935	895	1153	944	1070	1342	1042	968	709	1132	786	812	907	1005
AAACGTCGCGTCCATGCTGTTGCC	TRCN0000465862	CALHM2	81	68	54	18	39	63	57	51	70	63	43	38	40	115	53	113
CCGTGCAACTTTGTCGACCACATC	TRCN0000465863	LMBRD1	236	239	420	248	122	128	182	215	184	170	87	223	122	204	66	186
GATATCCTGGCTTTAGGAGCGTAC	TRCN0000465864	TAGAP	1751	1334	948	972	1429	1376	1329	1134	1232	1171	1071	927	1097	1264	1183	1473
CCAGCAGTGCTCGCAGGGGAAGCC	TRCN0000465866	OSBPL8	158	202	175	140	198	132	128	196	132	130	43	27	148	85	212	17
TAGGGGCTGACTTGTATCCATACG	TRCN0000465867	OGFOD2	4779	4533	4519	4140	3492	2740	3341	3595	3535	2940	3028	2899	2649	2753	2459	3247
TCGACCCCGAATAAACTTGGCATC	TRCN0000465868	CTTN	433	343	301	296	371	354	166	318	162	259	81	217	194	111	166	133
TGTTTAACGTTGTTGGGTCATAAC	TRCN0000465869	BTF3	1061	1220	1127	1279	683	820	978	959	727	588	606	715	751	804	1054	853
TTCGCGACAAGTTCACTTTGATAA	TRCN0000465870	MYD88	2145	1870	1657	1998	1425	1739	1618	1535	1606	1550	1232	1364	1434	1448	1490	1719
TTAGCTCTTCTGCGATGGGTGTTT	TRCN0000465871	SCAND2P	1640	1384	1295	1447	1582	1339	1317	1139	1366	956	945	1084	1077	1171	977	1286
GTAGAGTCACTGCCTTGTCCTAGG	TRCN0000465872	MT1E	4376	4189	3879	3788	3193	3319	3557	3138	3241	3079	2767	3769	2815	3496	2750	3443
CCACTATTCTCGCAAAACGTTTTC	TRCN0000465874	DNAJC11	1308	1324	1239	1236	1163	914	849	858	858	450	616	1192	1012	836	685	950
TCTCCACTCTCTTGAGCCTGCTCG	TRCN0000465875	DNAJC1	1553	1365	1058	1309	1051	1321	1269	1064	1194	1124	954	1346	979	779	1176	962
GATCCTCACGCCACGCATGCATTA	TRCN0000465876	KRBOX4	513	461	359	553	418	375	300	383	383	409	461	468	309	382	400	295
AACAGAGGGTGCTGCATACATATC	TRCN0000465877	GNG12	1949	1849	1569	1505	1451	1683	1416	1337	1582	1559	1399	1447	1146	1441	1292	1290
ACACTGGGATAATCTTGTACGCTG	TRCN0000465878	LRRK2	604	543	662	453	369	354	305	356	391	377	343	341	264	304	322	459
TGGCAACCAATAACTTGAATACAA	TRCN0000465880	SPINK7	4986	5459	5751	5761	4210	3007	3538	3437	3460	3586	2796	3598	3077	3457	3308	3256
TGAGTTATTATACCGCAGATCAAG	TRCN0000465881	MUSTN1	1719	1791	1792	1855	1166	1332	1084	1303	1125	1458	1132	1403	1149	1202	1039	1120
AAGGATTACATCCCCCTCATGGGT	TRCN0000465882	AHNAK2	1109	927	486	563	987	992	743	957	764	948	906	820	603	722	848	720
CTCAAGAGTACCAACAATTCGGTT	TRCN0000465883	GPC5	1467	1331	941	1023	834	977	1082	874	915	810	918	850	661	546	1118	1053
CCGAACCATAATTAGGCGGTCATG	TRCN0000465884	LZTFL1	1324	1363	1053	1425	1142	1049	1147	1259	1155	939	886	693	869	867	824	902
TCGTTTCTTTTATGTTATAGGCAA	TRCN0000465885	TMEM246	1461	1230	820	896	1086	1355	1008	1118	1196	995	970	1039	1058	847	1024	952
CGTACAGTGATAGGTTTCCCTCAA	TRCN0000465886	KRTCAP2	5815	5750	7078	7029	4400	4071	3322	4243	4548	3734	3380	3522	3776	3805	3317	3341
ACCCGATCCTGGGATTCCCTATCG	TRCN0000465887	CBFB	1584	1409	1223	1505	1180	1007	1001	1028	1090	1028	993	1066	821	879	1142	1102
CATAGAGTTGCCTGGTATGAGCGT	TRCN0000465888	KIAA1456	2348	2361	2180	1970	1506	1571	1503	1863	1628	1698	1800	2150	1514	1128	1673	1565
AGCGACACACGAAATTTACTGCAG	TRCN0000465889	FUT2	4564	4594	3288	4248	3384	3366	3298	3408	3040	3315	2956	3262	2621	3160	3062	2873
AAGTTGCACTGGAGATTTACGACA	TRCN0000465891	KAZN	277	220	182	149	197	374	200	195	256	190	177	244	118	185	123	228
TGACTCGGTCACCGGAGAGGATTT	TRCN0000465892	PHF20L1	1366	1324	1084	1174	896	1016	898	886	1017	888	868	715	651	691	919	838
TTCCGCCCTGTATTCCGGTACGTC	TRCN0000465893	ENTPD2	586	466	367	301	347	468	364	444	291	370	369	344	278	310	368	335
GAATTTACCAGGTTTGATCACAAA	TRCN0000465894	HRSP12	5360	4499	3639	3774	4348	4230	4166	4138	4203	3911	3879	3931	3676	3822	4019	3743
CCTGACATAGAGGTGGGACTACAG	TRCN0000465895	LOC100653061	4516	4326	4944	3895	3429	2731	2924	3281	2828	2714	2771	3127	2368	2556	3060	2615
TGGTACACAGTCATTTGCATACCT	TRCN0000465896	SAMD4A	2366	2260	2624	2417	1295	1870	1703	1758	1425	1801	973	1648	1332	1142	1144	1488
CCCGCAATCACAACGATCTCAAAA	TRCN0000465897	XLOC_l2_007111	6617	7075	8517	8065	4641	4693	4785	4173	4597	4689	4010	4334	3784	3423	4150	4240
AACAGAGGCCCACTTTCTTTACCA	TRCN0000465898	PACSIN3	2365	2188	1439	1443	1825	1700	2521	1487	1804	1897	1315	1424	1502	1735	1561	1687
GAGAGTTCGCTCAGAAAAATCGGC	TRCN0000465899	LHX8	1383	1139	985	862	1169	1254	1129	1020	1095	1040	999	937	838	736	1100	823
ACCTAGCCAACGACGCGGATCGTT	TRCN0000465900	TTLL2	1264	998	904	655	874	879	733	758	677	619	611	660	620	728	649	910
ACACGTCCTAACCAGTCCAGGGGA	TRCN0000465901	ARG1	306	302	218	202	246	276	237	244	293	216	309	268	262	204	172	201
ACATAGTAGAATTAAACCTCGTAC	TRCN0000465902	POLR2D	1650	1517	682	829	1043	1438	1201	1354	807	1402	1153	1083	1255	1594	1163	1433
CATGAAACAGTCTTTCAGGAAGAT	TRCN0000465903	ATP5J	3212	3123	2809	3498	2249	2023	2005	2057	2071	2237	2299	2047	1932	2259	2248	1790
AGTACCGCGTCTGTCCTGGATTCA	TRCN0000465904	MRPS36	2567	2149	2203	2302	2002	2239	1632	1785	1329	1694	1419	1861	1231	1607	1546	1508
TAATCAAATAAGTATCCCCGATCA	TRCN0000465905	DIAPH1	1756	1498	1550	1303	1271	1619	1274	1214	1174	1221	1048	1141	1077	1144	1263	1461
CTATAGACTTTCTCCCTCCCAACA	TRCN0000465907	FLJ26850	3222	3024	3541	2703	2361	2736	2026	2162	2555	2142	2083	2374	1991	2237	1948	2827
AGTTTACCATAGGACAAGCTTTCC	TRCN0000465908	TARP	2042	1854	1405	1548	1531	1912	1906	1879	1714	1440	1533	1515	1273	1377	1626	1865
CCGATCGTATGCCCGGGCTACAGT	TRCN0000465909	GPR182	2335	2345	1963	1495	1511	1792	1572	1500	1425	1766	1382	1543	1429	1269	1586	1370
CTATGCAGGCATAGCACATTAATA	TRCN0000465910	ARMCX3	246	239	225	94	95	108	210	237	124	101	131	98	115	148	89	172
AAACTTCGGATATCTATTGCGGCC	TRCN0000465911	ATP6V0D1	449	395	242	332	489	431	386	409	335	495	244	300	411	357	347	448
GTGCAGCAAGCTTCCTGAAAATCG	TRCN0000465912	NO_MATCH_212	3703	3277	3239	3014	2981	2865	2684	2542	3005	2678	2896	2353	1887	2383	2519	2767
ACTGATCCGGAGACCTCTTGCGGG	TRCN0000465913	NEK3	255	208	146	167	95	184	165	215	150	287	180	146	177	125	261	234
ACAGGCTATCTCGGTAAAGTGATA	TRCN0000465914	DCAKD	1359	1253	1135	1085	899	1124	1055	1325	1071	725	886	796	1096	723	1029	936
AACCGTCGGGCCCACCATGAAATT	TRCN0000465915	MAP2K2	398	267	202	268	285	363	331	255	186	229	206	180	325	141	254	253
CCATCAGTCGCCGTTGCAGCGCGC	TRCN0000465916	AMOT	1004	989	738	751	608	622	754	635	677	617	415	737	556	511	886	561
TCTGCGTGGACTTTCAGGGTCAGA	TRCN0000465917	RAB1B	2089	1981	1948	2021	1327	1397	1677	1596	1487	1376	1305	1236	1231	1481	1526	1588
TGGCTCCTCACAGTAAGTGCAGAC	TRCN0000465918	HEXIM2	824	738	627	659	534	524	401	519	344	535	587	581	524	503	528	580
TCGTATGCGATTGTTCAACGGTCC	TRCN0000465919	C12orf10	1436	1259	1084	1047	1011	1086	1086	1123	1169	969	851	813	828	1053	1024	987
TTCCTAGGTGACGATCGTCACCGG	TRCN0000465920	NO_MATCH_290	3813	3219	2859	3089	2807	2820	2825	2689	2805	2657	2317	3341	2404	2402	2616	2497
TGATCCCCCGCCACATTGAGGCCC	TRCN0000465921	CCNDBP1	2319	2469	2630	2808	1584	1667	1594	1979	1466	1992	1439	1669	1708	1403	1434	1254
AGGTTTCCAGATACCGCATGCTTC	TRCN0000465922	DPAGT1	143	80	114	48	155	126	40	171	50	80	48	47	45	40	129	149
CGAAAATCCCAACAAGGCAGTAGT	TRCN0000465923	STX12	2716	2743	2702	3066	1610	1750	1931	1799	1859	1694	1803	1666	1355	1258	1697	1113
GTCATGGAGAAAGTCGGTGACCGG	TRCN0000465924	TUBA3D	2	4	0	13	10	6	17	0	0	58	0	0	0	0	3	0
ATATTGGCCCAATTCGGGAGCGCC	TRCN0000465925	NO_MATCH_66	1530	1151	1114	1021	1399	1123	1305	1260	979	1080	951	1088	895	951	999	1001
TTATATACAGTCTTATCATTAACC	TRCN0000465926	PEX16	883	788	458	373	529	953	904	825	688	812	828	699	565	514	702	782
TCACACCACCCTTTGCCCGGCGGT	TRCN0000465927	CNBP	245	241	149	305	75	164	129	163	137	338	168	246	154	243	297	158
CAAGTCACTTTGCCATTGTGTCTT	TRCN0000465929	NCOA5	894	807	726	731	654	808	616	685	473	438	534	502	576	606	668	467
TAACAAAGATGTCATATTTCTGAA	TRCN0000465930	MOCS2	2017	1950	1679	1852	1528	1705	1436	1418	1527	1397	1007	1542	1114	1285	1508	1551
GTTACTGAGACAACATTACCTACC	TRCN0000465931	CPA1	972	936	580	672	832	840	705	858	693	739	726	770	612	666	856	692
GCCTATCAGACCGAAGTTGTCGTT	TRCN0000465932	IP6K2	1380	1219	1618	1418	979	1032	1102	1152	976	1036	970	924	685	910	711	938
AATGCGTTCGTGACACTTACGCCT	TRCN0000465933	PSMC4	198	170	95	128	192	170	241	173	194	105	125	133	142	227	205	140
AGGGATCCAAATCCGCCCCGTTAC	TRCN0000465934	ELAC1	808	681	587	625	616	465	719	494	492	558	623	304	346	340	504	756
AATAACATTAGATATCATAGTTAT	TRCN0000465935	TSPAN1	1338	1031	770	584	1213	1079	1195	1019	1163	951	1161	948	852	997	1056	932
GTTTATCCTTCCCCACGTGGATCC	TRCN0000465936	HBG1	1284	1021	763	761	1297	1292	1150	1191	999	1019	1104	1071	776	1027	1083	931
GCGTTAGCTAGACATGACAGTTCA	TRCN0000465937	NRG4	2844	2588	2358	2395	2113	2021	2271	2277	1931	1826	1837	1780	2043	1714	2029	1930
TAGTAAATATATTTCAGCAGTCTT	TRCN0000465938	BANF1	1713	1544	385	550	846	754	884	918	966	1264	805	1302	979	634	839	909
CCTATTAGCTTAATGCGATACTAC	TRCN0000465939	ACTR1A	1290	1426	1414	1338	961	803	1088	1271	1175	1038	925	845	830	879	1181	1144
GGAACCTGCACCATTTAATATTAT	TRCN0000465941	DPPA3	3250	3243	2633	3044	2793	3222	2462	2817	2655	2667	2632	2509	2001	1938	2346	2058
TGCTTACAGAATAAAATTAACGGA	TRCN0000465942	USH1G	744	836	446	532	404	485	593	642	548	374	578	545	362	517	460	812
CAAAGTACCTTACTCCCGGAAGCT	TRCN0000465944	SPANXA1	2999	2943	2842	2895	2585	2013	2085	2026	2061	1872	2185	2323	1694	1902	1669	1845
CACCTTTGCATCGTAGGCATCTCC	TRCN0000465945	CXCL16	2646	2726	2704	2509	1838	1819	1981	1623	2131	1824	1559	1948	1770	1619	1592	1977
ATGACGTAGCCCATCTAACAAATT	TRCN0000465946	EVA1C	1413	1082	919	688	997	1192	1233	1051	1165	836	918	855	890	895	857	878
TCATCGTGGTCTTCAGCGCGGAAA	TRCN0000465947	COX6A2	6321	5943	6897	6836	4732	4511	4207	4434	4417	4550	3957	3812	3801	3961	4046	4987
GCCACACCTCTAGATATCTCACAT	TRCN0000465948	ERN1	185	208	41	117	197	336	64	166	233	131	148	54	61	104	67	185
GCTCGAGCGTCCCAGCTTCGCACC	TRCN0000465949	MTMR7	323	246	246	155	241	193	258	232	187	94	205	260	199	103	126	123
TCCCAACCTTTAAGGGGCCAACAC	TRCN0000465950	PRR11	4109	3931	3396	3609	2809	2942	3100	3187	2960	2880	2442	3033	2379	3071	2715	2923
CCGCGGTTGTAGGTACATGACAAT	TRCN0000465951	PCGF1	4823	5155	5730	4852	3774	3425	3670	3668	3719	3334	3180	3616	2765	3122	3387	2881
ACATTAGACTGTTTTTCCGTCAAT	TRCN0000465952	SARS	771	713	433	637	612	528	438	636	650	538	494	440	544	379	455	454
ACACTCAGAGACAAGACAATAACC	TRCN0000465953	CCDC90B	38	79	16	121	82	47	47	64	48	26	24	53	57	73	96	16
TGTTTCGTACCTGTAGTCAACACA	TRCN0000465954	C7orf33	3303	2929	3035	3210	2557	2113	2402	2417	2207	2428	2465	2027	1488	2211	1884	1872
CGAGCAGACAGACTAGGCTGCGCA	TRCN0000465955	PHF19	145	236	333	133	161	258	9	82	129	56	60	162	140	126	69	209
ATTCGAGTTTATCTAAGTTACTTA	TRCN0000465956	GCM1	37	32	18	12	32	42	9	28	16	34	75	37	41	16	68	23
ACCGGTGGACCCATCACCGCCCGA	TRCN0000465957	APOC3	6891	6614	6875	6846	5578	5473	5086	5131	4870	4469	4315	4737	4145	4777	4665	4297
AAGCTGAGTCGGGCCAGGGGTGCC	TRCN0000465958	PSTPIP2	871	775	750	521	720	834	968	795	799	789	563	648	772	626	590	752
GTAATTTTCATGTTATTGAATACA	TRCN0000465960	UPRT	2551	2236	2024	1538	1923	2313	2250	1837	2144	1677	1991	2215	1726	1395	1874	2081
ACAAATACAGGGATTTCGTATTAG	TRCN0000465963	DAND5	33	23	5	12	32	54	33	39	66	38	33	33	29	12	26	40
AATGGTCGCTTTTGACGCGCTGGA	TRCN0000465964	PABPC5	1400	1029	889	704	1276	1103	1344	1172	1279	1116	953	1014	839	877	986	1101
CTGTAATCCTACAAACCTTTAATC	TRCN0000465965	YTHDC1	345	365	254	233	203	316	245	281	257	279	117	209	150	294	219	349
TGCACCAAATCGTATAGACTTAAT	TRCN0000465966	HIST1H3A	1554	1728	1761	1978	1203	1096	957	1540	1117	928	1091	1151	950	766	870	905
ACTGAACGAAAGTCCAATTAAAAC	TRCN0000465967	NDUFAF7	868	802	978	580	804	887	600	708	729	642	718	516	464	608	706	442
CAGTTTAGCAGGTGGAAATGCTTG	TRCN0000465968	SCAMP4	1360	1253	1195	1270	880	847	881	893	1321	759	840	968	778	927	1034	763
GCCACCGGCCCCGTCGATTCAGTA	TRCN0000465969	ACTR1B	472	384	351	398	338	305	299	300	381	335	411	216	212	199	402	442
AAATCCTAGTAACGCCCCAATATA	TRCN0000465970	RIMKLA	1793	1226	1136	793	1466	1681	1893	1442	1250	1400	1372	1286	1396	1381	1295	1531
GAGTTGAACGCATTGATGTTACGC	TRCN0000465971	TMEM255A	2782	2503	2090	1743	1838	2456	1857	2255	1792	2202	2179	2384	1781	2214	2534	2405
CAGCATATCTTTGCTACCGCCCTT	TRCN0000465972	EDF1	1947	1905	2136	1762	1438	1598	1466	1338	1386	1589	1182	1248	1119	1400	1204	1380
TACCAGTTAAGATGCCCATATTGT	TRCN0000465973	Tbc1d23	1143	1187	1076	612	760	866	732	742	715	906	665	630	591	1004	876	745
GGACATATCAATACCTGTCATGGC	TRCN0000465974	MAT1A	1676	1787	1344	1437	1399	1383	1138	1398	1113	1649	1343	1552	943	1147	1193	1116
GACACAGAGAGTCTTGACGCTATT	TRCN0000465977	IRAK4	706	659	528	467	377	479	456	403	472	338	271	628	296	281	501	482
CCCTACCGTCAGTTCATCCGTGCG	TRCN0000465978	PHTF2	1698	1801	1770	1645	1272	1228	1131	1233	1352	1117	1229	1238	1249	1184	1330	1118
CATCCCAGCCAACTCTTCTTAGCA	TRCN0000465979	C1orf21	3023	2894	2572	2653	1763	1924	1863	2005	1752	1919	1798	1847	1825	1583	1743	1619
TTCGATTTCATTAGCGTTTACTGT	TRCN0000465980	GTF2H5	1715	1517	1428	1389	1495	1323	1389	1076	1120	1746	1190	1389	1182	1282	1362	1469
AGCCATATATCGTCTATAGTGAAC	TRCN0000465981	GRPEL1	6414	5453	4551	4712	4390	4503	4215	4381	4331	4559	3584	4167	3592	3585	3879	3998
TTTTGGTTGACGGAGATATTCTGT	TRCN0000465982	IWS1	2555	1934	1268	1424	1887	2056	2038	1804	2059	1988	1895	1850	1362	1907	1775	1767
CACGGGCCCGTCCGTGATTTCTTT	TRCN0000465983	PCDHGA9	178	152	99	63	181	102	62	108	115	46	58	70	72	93	120	84
CACCCTATCGTCGAGGTCGACTGC	TRCN0000465984	PRAMEF5	2203	2006	1897	2144	1806	1422	1948	1675	1768	1388	1551	1661	1437	1158	1638	1476
GATCTTAATAGATGAAAAAGGGTT	TRCN0000465985	ASB16-AS1	1066	880	884	923	747	567	537	655	741	809	440	799	664	630	804	884
TGGTCCATTAGTAAAGCCGACCCG	TRCN0000465986	AMTN	7637	7785	8760	6818	5324	5692	5280	5415	5216	5371	5242	5020	4329	5041	4670	4473
CAAGAGCCGTGAGACGTTCAGATC	TRCN0000465987	TBCK	880	803	1035	459	527	502	636	595	639	602	446	456	389	601	396	349
CCTAACGGGCAGTGTTTTATGTAT	TRCN0000465988	TBC1D7	880	875	1048	752	739	800	571	727	581	742	747	934	572	780	523	613
TTATGCGAGTCGGAGAGAGTATAG	TRCN0000465989	PSMA2	2756	2321	2383	1822	2207	2060	2037	2260	2259	1918	1892	1677	1539	1462	1853	1926
CTTATAGGCCCCCTTGACCGTATG	TRCN0000465990	GFRA2	0	1	2	1	2	0	3	0	0	0	13	0	9	0	1	0
TCAGACGAGTGTAGCCCGCCATTG	TRCN0000465991	SCG5	2860	2656	2758	2411	2059	2145	1933	1901	2190	1723	1503	1759	1658	1572	1533	1943
TGGTCAGGCTACGAGTATGATGCT	TRCN0000465992	Emilin1	2317	2417	1966	2390	1539	1890	1740	1703	1824	1710	1974	1191	1542	1094	1335	1909
AGCGACTTCACATGTCTCCTGTTA	TRCN0000465993	DSTN	3639	3074	3023	2778	2902	2765	2910	1966	2863	2520	2454	2134	1931	1886	2342	2347
TCCAACACTCCGTGGGTCTAGACT	TRCN0000465995	LOC440461	1623	1662	1740	1498	1191	1043	1313	1436	1176	817	1066	1071	1033	1064	1109	1080
CCCTCACACCACGGATTGAGCCTG	TRCN0000465996	WFDC9	2112	2500	2991	2801	1667	1687	1598	1442	1752	1680	1472	1510	1173	1417	1270	1538
AATCGATTTAACGGTTTTTATCAT	TRCN0000465997	CCL19	994	744	630	617	803	820	680	766	813	754	633	553	640	844	656	862
GAGGATGTCACACCACGATATCAT	TRCN0000465998	SLC22A11	762	737	510	536	631	652	796	377	456	488	537	597	357	544	669	444
CATGGCGATGGACTCTTGTAAGTC	TRCN0000465999	HIST1H3H	2405	2406	2641	2464	1855	1728	1714	1930	1699	1989	1383	1764	1651	1178	1630	1620
TAACGGGGAACGTTCGTTGATAAT	TRCN0000466000	CSHL1	1664	1604	1425	1277	1286	1189	1196	1200	958	1114	998	1057	884	1176	1116	1123
CAAGCATGCTGAACCCAGTTAGAA	TRCN0000466002	GPX4	1754	1633	1632	1738	1238	1244	1342	1332	1166	1160	1231	1002	960	1482	1037	1034
TTTCCCTTTCAATTGTCATAACTA	TRCN0000466003	ADI1	499	471	499	358	466	545	517	502	394	436	483	374	398	437	476	352
GAAGAGGTGCTTGGTCCACTGAGC	TRCN0000466004	TXNDC12	1684	1508	1462	1488	1242	1284	890	1329	1111	1193	1056	850	981	1154	1036	1281
CAACCGCAGTAGCTAGCACTAACG	TRCN0000466005	PCLO	1950	2140	2921	2211	1453	1312	1579	1282	1178	1205	1261	1605	1243	1106	1452	1620
GGGGTGACAAGATATGCTGACTAA	TRCN0000466006	PIM1	11101	10926	14928	19129	6537	7101	6648	6167	6275	6940	6585	5560	5439	5563	5755	5139
ACAACCTTGACCTCCTCTTCCTCT	TRCN0000466007	XLOC_l2_009464	985	764	1209	1080	877	605	754	832	687	653	738	423	685	441	442	517
GCCGTCTACCAATAGACCACACTT	TRCN0000466008	MTMR11	4367	4395	3955	3741	3261	3033	3106	3664	3577	3343	2783	2906	2896	2862	3068	3332
CCAACGCTTTGACCTTTGCAGGAG	TRCN0000466009	NCK2	981	1013	756	821	816	848	744	679	794	665	671	570	597	641	476	482
GCCCTAAGGACAATAGACCAGTAT	TRCN0000466010	CFLAR	1808	1682	1265	1214	1342	1196	1102	1105	1064	1088	1054	1320	1164	1179	1211	1635
GTCTACCCGGTGCTCGGTATTGGT	TRCN0000466011	CEP63	780	809	402	490	806	649	774	599	640	642	673	601	671	523	615	872
TCCGATCGTACTGATTTAATAAAT	TRCN0000466014	BMP4	29	34	26	5	12	8	58	34	12	42	7	7	13	0	42	0
GCAACCCGTAATCTCTTCATGTCC	TRCN0000466015	CDCA4	70	61	51	19	38	80	86	34	6	119	17	45	54	47	40	44
CTGCCGGCGTGGTCGCGCCGGGCG	TRCN0000466016	XLOC_010072	677	614	771	473	544	495	595	493	401	359	266	674	390	348	500	521
AGACTTACAAACACAAAACACTAA	TRCN0000466017	FAM106CP	2191	2044	1774	1703	1747	1691	1919	1510	1375	1500	1309	1693	1330	1328	1720	1676
CTTTGGTCGGCTCTAATGATCAGA	TRCN0000466018	CNST	0	0	0	0	0	0	0	0	0	0	0	0	0	0	0	0
CCGATATTGTCCTTGCTTTGCCTC	TRCN0000466019	CLIC3	1614	1618	1874	1757	1141	1172	1035	1129	1028	850	929	1165	1019	820	1151	867
ACTGTCAGATTCACTGTCAACTTC	TRCN0000466020	CDKN2AIPNL	2138	1851	1797	2296	1453	1629	1752	1537	1523	1845	1513	1400	1376	1598	1527	1859
GCAGTCTGTATGCATTACGATCCG	TRCN0000466021	LINC01580	1468	1419	1736	1157	1136	1027	993	1348	929	1102	1056	698	1029	1056	1077	693
TTACCAAGGATTGAGGAACCATCT	TRCN0000466022	WDR20	3585	3401	3390	3027	2861	2966	3241	2705	3038	3440	3232	2576	2541	2952	2337	2657
AACGACTCTGGGCTGACGTTGCGA	TRCN0000466023	ISL1	759	623	210	245	495	509	495	547	672	485	445	436	422	533	461	526
AACGTCATGGCGTAACCGGCGGTC	TRCN0000466024	JUNB	542	433	210	260	486	339	458	301	315	300	263	319	321	391	398	349
AGAGCGCAATACTCACCCAACCTC	TRCN0000466025	VAMP2	6389	6155	5573	5212	4464	4218	4717	4899	4124	4147	4126	3899	3845	3690	3910	4096
GTGCGACGCCAGGGCGATAACCTA	TRCN0000466026	BCAS1	2607	2277	2566	2055	1937	2240	2047	1974	1860	1702	1593	1669	1644	1733	1778	1700
GTTATCCAGGCCCAACTCCCATGA	TRCN0000466027	COG8	1486	1254	1202	1218	988	1315	1228	1107	986	1250	952	1217	1096	1039	1172	1106
GAAAATACCAAAACAACTCGCCCA	TRCN0000466028	CCDC170	713	588	384	250	496	445	451	410	435	380	286	558	431	377	427	601
TTTGCCTTAGCTTACAGAAAGGGA	TRCN0000466029	DDR1	180	150	136	135	185	181	58	79	101	184	132	173	135	98	134	139
CGAGTTCAGCGGCGGGAATCTAAT	TRCN0000466030	DOK2	1660	1813	1536	1543	766	983	963	1072	1028	864	1105	1020	852	1120	806	857
ATCATTCTCTAGATTTTGCGCAAA	TRCN0000466031	CBLC	545	445	297	372	426	593	362	466	341	418	367	510	379	500	322	578
CCCCTTCTCACCGTGAGCAATTGG	TRCN0000466032	IDH2	0	0	0	0	0	0	0	0	0	0	0	0	0	0	0	0
TTATGATGGGTGCAAACGTCTTGT	TRCN0000466033	SLC30A4	878	604	567	370	701	605	495	551	527	501	424	471	513	476	530	439
TTTTAACACATCTAGGCCTGTTCA	TRCN0000466034	SMPD2	670	519	416	383	700	587	835	699	499	602	657	444	420	552	502	804
ATAAGTGTGGCGTTGAGGTACCAC	TRCN0000466035	APOA2	1086	1012	788	823	976	1030	855	733	912	1028	841	847	538	773	847	803
CAACATCGGAAACCCAAACACCAT	TRCN0000466036	D2HGDH	2509	2684	2357	2764	1684	1700	1884	1941	1802	1479	1804	2382	1504	1346	1744	1760
CTTAATCTAACAGAATCTTCCCAA	TRCN0000466037	FAM74A1	3539	3084	2932	2671	2653	2743	2456	2228	2853	2724	2325	1929	2416	2504	2450	2441
ATTACCAGCTCGCGTATTCCACGT	TRCN0000466038	LTB4R	451	278	395	312	269	238	290	157	216	193	263	259	147	188	152	202
AATCACAACTGGAGACGATCATCC	TRCN0000466039	COX20	1021	842	623	690	912	854	810	1034	924	744	686	767	608	579	626	919
TCGGGATGGATTTGAGCCAAAACA	TRCN0000466041	SGSH	1551	1584	1784	1070	1054	880	1188	1080	1110	1003	675	1124	903	867	1093	794
CATTAGCAACTTTCTTTGTCCTCA	TRCN0000466042	P2RY13	4370	4160	4527	3812	3370	3280	3609	3345	3180	3102	2452	3428	2707	3030	3092	2630
TCTCGACATAGAGGAGGGGCTGAC	TRCN0000466043	PTPLB	1121	1078	756	879	954	933	839	866	1011	704	939	736	764	582	840	619
CTACTTCAAACGACTTCGACATAT	TRCN0000466044	LRRC40	650	605	434	301	447	463	565	471	609	365	417	411	287	498	424	493
TTGGCCCTCATGACACCCTCCTCA	TRCN0000466045	ASIC4	1105	1014	642	672	1045	781	1121	781	721	816	692	639	593	750	782	808
GCGTACTTGTATTCTTCTACGTGG	TRCN0000466047	CMTR2	696	559	446	360	609	533	698	576	290	510	550	395	435	429	413	572
TTTTAAGACAAAATGCATTTTCAT	TRCN0000466048	MCM5	173	109	57	65	64	150	119	81	87	174	53	108	91	84	66	15
TGCTTACCGCAAAACAGCAAGTAG	TRCN0000466049	PLEKHS1	2771	2670	2688	2694	1727	1761	2174	1803	2193	1571	1357	1562	1562	1412	1906	1838
GCTAGTAGCCCTATGTAGAGAATC	TRCN0000466050	CRYZL1	3255	2898	3606	2798	2216	2759	2302	2451	2636	2450	2399	2565	1873	2196	2174	2255
GCCTGTTACCTCATGCACACGTCT	TRCN0000466051	LINC01260	4038	3608	3443	3658	2828	2654	2891	2827	2652	2602	2727	2825	2130	2552	2903	2742
CCCAGCGAGCTATTGCCCAGAAGA	TRCN0000466052	TNPO2	1125	949	704	961	749	495	765	729	736	594	609	681	440	447	581	521
ACTCATTGTGTTAAGAACACACCT	TRCN0000466053	Mok	702	613	406	517	645	440	648	644	724	591	625	332	354	453	508	475
CCAACACGTTGATCTATCGAGCCC	TRCN0000466055	ZMYND19	2691	2643	3220	2367	1716	1867	2022	1829	1803	1611	1629	1568	1577	1797	1574	1563
GATTGTGGGACCCCCCCAGGACAG	TRCN0000466056	CHMP3	4190	3351	2629	2741	2937	3110	3860	3065	3114	3364	3010	2947	2800	2541	3138	3147
TTCTCGTTTAACCGATAAAAGTGT	TRCN0000466057	TIRAP	99	99	56	95	109	40	166	99	99	117	105	65	15	48	160	83
TATAACTAACAAACAAGCTAACTT	TRCN0000466058	LOC102724334	2342	2265	1763	2153	1620	1791	1550	1951	2112	1615	1377	2085	1249	1554	1542	1498
ATCGGCGGCAGAAGAATAGTAGGG	TRCN0000466059	NO_MATCH_71	289	227	187	265	120	177	214	261	177	135	211	194	98	115	225	130
TAAGTCCGAGACGCCGGACTGCCA	TRCN0000466060	IRF9	89	72	64	29	69	71	58	53	133	2	26	132	21	35	47	24
CTACCCCATCTGTCTTCAGGGTTG	TRCN0000466061	SACM1L	591	551	390	304	382	311	429	464	366	386	404	329	314	402	309	369
ACAAGAGCTTCAGTGTATAGTATA	TRCN0000466062	NO_MATCH_22	3883	3884	3706	3763	2604	2799	2910	2646	2408	2292	2415	2390	2957	2514	2566	2936
AGCAGGCTTTCTGTGCGGACCCCT	TRCN0000466063	DUSP23	1696	1705	1827	1897	1231	1378	1192	1330	1034	1199	854	992	1053	1472	1159	1146
AGCTAACCTTCCAGCGCCAGCCTA	TRCN0000466065	BEGAIN	2038	1756	1243	1065	1117	995	1039	1161	927	972	1046	840	827	731	1136	1000
CTCGATTCTATACCCGAAGACGAC	TRCN0000466066	NO_MATCH_150	2456	2369	2015	2346	1771	1612	1953	1959	2096	1647	1426	2033	1489	1491	1875	1355
ACTCACAATAACTGGACTGTAACG	TRCN0000466067	AVPI1	3072	2724	2629	2831	2314	2103	2498	2173	2026	2189	1986	1570	2050	1821	2117	2027
TTGCTTCATATCGACTCGACAAAG	TRCN0000466068	HMGB4	3002	2359	2086	2154	2085	1972	2193	2114	2273	2081	1880	1578	2093	1640	1791	2160
TTAGTACTATCCCTGAGCCTCTGC	TRCN0000466069	ZNF77	546	425	194	229	366	378	410	373	363	320	340	379	194	349	215	353
CGATGCCGCGCTCGGGAAGCGGAT	TRCN0000466070	NR2C2	2325	2327	2431	1900	1481	1304	1762	1598	1365	1320	1404	1262	1280	1139	1339	1255
GTATGCGCAGGCTGAAACTACCAT	TRCN0000466071	CCL18	1125	941	1073	1052	706	817	873	1049	788	754	860	939	422	913	815	931
AATTCCCCCCCCAGACCGACGGGC	TRCN0000466073	FAM60A	824	725	509	588	746	702	774	702	911	880	593	579	618	645	624	547
AAAGAAGACGGCCCAATGCCACAC	TRCN0000466074	USP8	218	135	75	72	221	130	175	135	225	131	216	147	131	222	118	44
TGGGACGTCCGGAACGTATACCTT	TRCN0000466075	LELP1	1609	1533	1759	1541	1038	907	1034	1157	1088	962	930	1232	977	917	1049	1047
GCAAGCCGGTGCCTGTTGCCATTT	TRCN0000466076	PHYHD1	3045	3036	2872	2729	1897	2265	2652	2124	2640	2160	2078	2305	1665	1885	1986	1871
GGCCGACCGACTCGATATCAATGA	TRCN0000466077	ANKRD44	1990	1955	2174	2010	1478	1420	1439	1531	1157	1180	1384	1293	977	1164	1133	1528
GCACGATCACTACGTGCCGCCTTG	TRCN0000466078	NAPB	1215	1144	886	871	892	770	833	790	754	786	852	594	720	876	666	1001
TCTGGAACTAAATCTCTTCCTTCG	TRCN0000466079	NO_MATCH_260	2492	2269	1896	1691	2144	1928	1870	2083	1801	1955	2021	1851	1719	1899	1518	1802
AAATGAGCCCAAAGCTAGAACCAC	TRCN0000466080	DHX30	539	436	235	282	403	480	386	411	354	258	379	383	403	326	270	341
TCAGTCTGCCTCTATCAAAAATCC	TRCN0000466081	ZNF707	1157	1077	1093	842	839	850	1032	875	868	878	823	886	673	911	680	733
GGAGGCGATTGTTTTCGAACATGA	TRCN0000466082	SRPK2	696	848	471	469	369	556	786	688	454	396	432	682	556	355	529	499
GTTTGTTCTAAACATTGCGACATC	TRCN0000466083	ZNF578	266	225	140	162	219	337	142	276	229	218	233	253	192	242	247	194
ACACCCCAAGATTCCCCTAAGATG	TRCN0000466084	TBL1Y	306	253	158	155	150	226	263	231	229	180	123	97	173	133	89	113
GTGATCCAATTTTGGTTGGTCGTA	TRCN0000466085	LEP	2178	2072	2007	1744	1847	1922	1774	1888	1913	1903	1908	1754	1639	1633	1760	1835
GCCGATTTTAATTGGTACCCATAA	TRCN0000466086	KCTD9	495	352	432	278	475	277	372	352	350	474	282	246	486	315	206	104
GGTCCATACGCCGCTCTGTGTCCA	TRCN0000466087	TMEM14B	1302	1134	1257	1247	928	939	960	962	1204	820	854	893	798	701	811	993
AATACGAAGATGTCTTTAAGGCCG	TRCN0000466088	DUSP18	2115	1604	1377	1194	1852	1900	1843	1578	1574	1313	1438	1436	1430	1422	1568	1457
CCTCTAGCACCTTGAGACCATTTA	TRCN0000466089	RPL27	3144	2974	3378	3156	2257	2291	2181	2327	2181	1708	2477	2064	1986	2086	2019	2432
CTCTGTACCGTATTTAGTGGACCC	TRCN0000466090	PLEKHO1	69	50	70	24	39	30	29	35	47	33	105	38	69	101	43	34
CTTTGAAACAGTCTTCAAGCCCTT	TRCN0000466091	RHAG	9	22	6	1	0	44	0	6	5	17	0	5	17	0	0	0
GTCCATGTACCTGACATATATCTT	TRCN0000466092	PHF7	89	89	20	69	62	71	23	42	65	50	117	31	52	19	80	88
ACATGTGCGCCCTATACTCCACAG	TRCN0000466093	KLHL28	56	29	7	79	15	16	29	22	45	26	14	32	7	23	21	3
TATGGGCTTGTCCATTTTTCCTAA	TRCN0000466095	MOB3C	39	54	87	70	28	26	97	29	53	35	21	39	10	21	29	26
CGTCATACGCACTTCCTGAATGAG	TRCN0000466096	DEFB118	11009	11898	14399	11256	7892	7412	7234	8129	8428	7936	7474	7396	6717	6892	7538	8072
CCGGCTATGAACAGCAGTTCACGA	TRCN0000466097	KRTAP3-1	10031	10155	11792	11006	7220	6989	7329	7356	7413	6633	6523	7069	6328	5980	5677	6679
AACGCCCTCACGTCCTGCCGCATG	TRCN0000466098	CD3E	20	3	16	5	7	6	4	16	0	2	1	6	0	3	5	26
CTGACAACCTTTTAGAATTATCCT	TRCN0000466099	XLOC_l2_014048	66	44	73	26	45	41	17	29	61	22	106	28	68	33	56	47
GTTCAATGGAATACGGCATAGATC	TRCN0000466100	EPM2AIP1	0	1	0	0	0	0	1	0	0	0	7	0	0	0	0	0
TAATCCGTTCGAACCTTCCAGGAA	TRCN0000466101	RLN1	2000	1993	1607	1756	1489	1190	1924	1703	1483	1225	1356	1316	1404	1369	1433	1227
GTTTTTCACCACCTTTTCAGCCAT	TRCN0000466102	Vps11	192	115	82	80	171	139	84	220	169	79	172	182	107	214	115	165
CTGTTCAATTGGTGACTAACCCAC	TRCN0000466104	ZNF280A	121	149	81	118	129	165	111	30	23	111	47	65	109	115	151	48
CAAACCGGAACACTTACATCGGCC	TRCN0000466106	LOC102725526	1034	1130	724	906	648	614	634	687	765	568	669	573	582	666	775	572
CTCCCGGAGGTCCTGAATAGGGAG	TRCN0000466107	RABEPK	2552	2543	2303	2175	2133	1663	1981	2275	1634	1651	1789	1996	1623	1425	1652	1940
ACGAACCAAAATCACGATTCCGCC	TRCN0000466109	C15orf39	3128	3019	2754	3105	2273	2203	2016	2123	2307	2296	2206	1818	2087	1992	2092	2005
TACGGTTTCCTATGTTTGGATCTT	TRCN0000466110	RPS12	2636	2522	2099	2372	1664	1708	1856	3933	1905	1846	1607	1679	1566	1835	1857	1752
CATGCGACGACGTCGATGGTGAAG	TRCN0000466111	MRPL53	1820	1894	2057	2131	1429	1263	1398	1315	1260	1715	1336	1426	1080	1294	1418	1441
AATTATTTCTCCATCCCTTTTCCC	TRCN0000466112	CXCL10	730	498	305	355	707	695	710	573	639	554	564	591	521	707	540	729
TCACGTTAGTCCTCGCGCCAAGAA	TRCN0000466113	M1AP	1833	1869	1570	1845	1597	1548	1605	1317	1264	1290	1763	1065	902	927	1441	1206
TAAAAATCTGTCAAGTTCTATTTC	TRCN0000466114	SERPINB8	2203	1913	1448	1680	1927	1335	1800	1511	1319	1451	1479	1066	1269	1299	1119	1206
GAACGAAATCACACAGCTCGGCAC	TRCN0000466115	CD9	1577	1429	1273	1365	1453	1272	1244	1071	1190	1185	1120	909	969	1093	955	1055
ATAAACGATTCCCGTCGCCAATCG	TRCN0000466116	EDDM3A	16	28	7	8	5	44	46	27	6	13	20	23	6	7	23	4
CGATGCGGTCTTCATCTAAGGATC	TRCN0000466117	LHX6	1651	1836	1627	1601	1420	1450	1651	1367	1318	1115	1220	1163	1235	1173	901	823
CTCGTATCTTTGAGGAGCTTTCAC	TRCN0000466118	SFTPA2	1414	1487	1325	1357	1118	1102	1164	965	1080	1267	1005	1079	731	1110	1091	1101
TTAAAGCTTTTAAGCAAGACCAGA	TRCN0000466119	NCOR1P1	1349	1232	1246	1086	1033	1262	1165	993	1329	944	781	653	693	850	945	575
GGGGCTTTCGGATGATGAGGCCTC	TRCN0000466120	TMEM259	729	659	764	718	556	475	400	446	448	335	393	564	415	531	641	357
ATTAGCAACAAATTGGATAACTGA	TRCN0000466121	MEIOB	756	506	359	371	590	486	555	444	564	599	367	464	607	398	522	586
TCCATCAGAACATGCTTGACACGA	TRCN0000466122	GGACT	2847	2737	2822	2655	2222	1974	1934	2276	2343	1633	1531	2449	1622	1785	1579	1457
CATAATTGTGCCATGTGGCCTGCG	TRCN0000466123	ANXA4	2225	2014	2056	1549	1704	1494	1728	1508	1522	1558	1291	1243	1236	1661	1279	1453
CTGTTAGATAGTAGAGCTCACCTC	TRCN0000466124	NUP62	705	634	412	403	378	583	442	409	492	382	339	541	319	447	345	473
ATCATAAACGAGCGGCCACATTTA	TRCN0000466125	ODF3L1	1927	1546	1442	1332	1565	1617	1350	1345	1579	1532	1414	1311	1015	1140	1348	1052
TCGAGCCATATCGGGGGAGGTCTG	TRCN0000466126	CNOT7	3042	2828	2903	3248	2175	2197	2502	2261	2385	2110	1826	2398	1888	1825	1857	1860
ACTCAGTGCCGCACGCAGTATTGT	TRCN0000466127	PRPS2	1306	1156	1257	883	966	1039	941	940	1131	968	831	910	828	973	782	994
GCGGCCCCGGAATTAGAATATCTA	TRCN0000466129	SARS	1338	1262	1374	1119	710	1075	662	965	811	906	904	912	937	844	1064	968
TAACATGCCGTAGTGTTTTGCACT	TRCN0000466130	LRIF1	2522	2404	1925	1944	1879	1847	1953	1793	2022	1740	1763	1928	2071	1422	1711	1478
CACTGAACAGATATCTAGGTCAAT	TRCN0000466131	LINC00526	601	744	403	738	594	469	437	453	531	365	463	450	393	247	584	478
TCATAAGCAAACAGGTTCCCACAG	TRCN0000466133	MAPK10	877	832	723	727	780	919	895	768	682	701	747	943	514	872	778	635
ATCGATAACCATCGCTTACCTGGA	TRCN0000466135	HIST1H2AC	1305	1253	954	851	1006	1130	1005	1044	999	1175	821	918	905	967	752	995
ACATCCAACAATACTGAGCCGGCG	TRCN0000466136	KLK11	6549	5874	6102	6264	4939	4772	4783	4662	4176	4732	4035	4035	3606	4230	4261	4433
CCTGCTTCTCAGTGTTAGTCTTGC	TRCN0000466137	BANK1	14	27	3	5	24	26	25	11	10	24	0	20	13	39	16	0
GGGCTTTAAACGAACATAAGAATC	TRCN0000466138	UBAC2	7946	7291	6593	6722	5665	6194	5259	5372	5894	4810	5341	4840	4285	4801	4795	5276
ATCTCCTCCTTAGATACATTTTTG	TRCN0000466139	CLCN6	174	135	129	77	192	71	119	130	104	107	165	62	63	107	214	133
TAAATGCTCCGCACTTCGTAATCC	TRCN0000466140	LYN	278	249	203	128	176	110	339	171	325	111	261	218	129	117	216	164
GTACTTAGTCCGCCGTTTAACTCA	TRCN0000466141	CHRNA9	1289	1130	823	924	1062	991	1006	933	1233	900	1043	898	612	889	1055	865
ACCGAAGAATAATCGTTTGCGATC	TRCN0000466142	UBL4A	63	19	22	1	59	0	5	80	4	10	12	0	32	0	0	22
TACGATCATACATTACCCGACAGA	TRCN0000466143	MTCH1	1578	1626	1275	1416	1431	1252	1091	1193	1217	1080	1374	891	1014	1015	1057	1200
ATGAAGCCGCACGTCCGTAGTTCG	TRCN0000466144	CCNG1	478	438	252	330	358	291	619	351	458	464	326	315	311	427	364	354
GTACACCCTACCGTCGCATACGAC	TRCN0000466145	ARSJ	3207	2897	3436	2423	2537	1883	1972	1968	2475	2390	2007	2328	2365	2052	2228	2369
CCGCATGATGTAAAGGCAATGCTC	TRCN0000466146	C21orf91	6188	6205	6349	5866	4360	3884	4777	4786	3981	4655	4582	4479	3871	3805	3915	4832
AATTGTTGAGCTTCTATCTGGTTC	TRCN0000466147	C8orf31	938	612	537	658	799	743	719	638	764	648	719	814	683	611	650	647
AGCTGGCCTTCGTTTGCCAGACCG	TRCN0000466148	GPATCH11	1454	1134	1026	937	1174	1176	988	874	1006	1272	925	846	888	684	1059	1064
ACATCACGTACCTGTTAGATCTTT	TRCN0000466149	HOPX	2598	2267	2716	2459	1928	1800	1852	1933	1973	1751	1690	1843	1595	1495	1586	1526
GTAATATAACCAAGGGGTTTTTTC	TRCN0000466150	UMPS	779	638	614	492	699	651	955	638	810	626	554	392	613	445	566	776
GATGTAGCGCAATTCGGCTTTTCA	TRCN0000466151	CHMP4C	1193	1152	947	932	807	853	1044	863	889	944	821	1011	881	1005	794	1076
CTTCTATGCACGCCGCGCGACCAG	TRCN0000466153	EPM2A	2175	1977	2005	1915	1798	1480	1487	1428	1704	1479	1573	1621	1385	1455	1569	1781
AGAGTTTACACGCATGCCCGAGAG	TRCN0000466154	CEP72	676	534	240	282	363	518	434	353	356	355	528	343	243	260	475	389
GTACTTATTGAGCAGGATATCGAA	TRCN0000466155	MIR99AHG	175	121	93	187	196	113	113	83	155	184	97	66	135	57	91	155
TTATCTCGGATCAATCTTAACGGT	TRCN0000466156	NTS	1699	1360	1164	1010	1389	1524	1181	1352	1094	1308	1131	1182	1036	1096	1121	1493
AACATCTTCCGGACGCACAACCGT	TRCN0000466157	HLA-C	990	722	487	552	676	599	819	703	793	590	725	576	709	782	581	704
AAACTCGCGCAGACGCCTACATTT	TRCN0000466158	SMYD4	516	362	173	182	299	527	412	393	268	327	285	312	237	293	335	507
CAACCTATACCTGGAGATCATGTT	TRCN0000466159	MTMR12	1266	1145	688	619	818	924	868	787	707	926	693	1187	796	735	728	938
TGTTACAGCTCGACCGTCGACATC	TRCN0000466160	NPPB	4487	4341	4670	4593	3077	3306	3194	3073	3072	3039	3071	2677	3276	2892	2968	3045
TTATGTGTTGTAGCTGGCACATAC	TRCN0000466161	FASN	960	836	651	597	713	559	823	673	534	533	813	575	701	457	550	631
GAGGAATCTTCGTGCCCGAAATAT	TRCN0000466162	ART3	1202	1081	1048	834	997	1168	1006	926	955	1001	871	1086	969	868	877	851
TCCGGCTGGTTATAACCAGTAAGC	TRCN0000466163	MAST1	72	72	71	59	22	56	44	23	58	73	47	32	80	50	102	20
CAGGCGTCCACGCTTTTATACCAT	TRCN0000466165	VPS33A	185	160	123	102	103	134	198	101	125	185	192	118	111	125	153	112
GCTCGGTCTAGCCGAATCGCGGCT	TRCN0000466166	EIF2B2	2272	2037	1556	1936	1673	1617	1701	1650	1417	1534	1432	1694	1143	1445	1665	1694
CACCCGTGCCAGAATGCAGCTCAC	TRCN0000466167	PITPNC1	328	354	219	305	231	232	154	102	368	215	194	172	296	266	119	107
ATCAAATCTGACTGTCACGGCAGC	TRCN0000466169	PIAS1	1706	1264	516	680	1401	1306	1778	1395	1115	1445	1199	1110	1018	1246	1236	1447
TGGCAGACGGTATGTAAAAATCTA	TRCN0000466170	SLC24A5	3458	3653	2896	2955	2649	2393	2593	2205	2035	2003	1980	2409	2188	1916	2367	2448
CGATGTGCTGGCTCAGCATAACTC	TRCN0000466171	CASQ2	86	51	32	119	58	46	0	64	51	17	120	58	75	47	12	38
AAATTCCCTCGGTGTATTCAGTAG	TRCN0000466172	NOP16	41	22	29	10	23	74	69	23	4	36	3	16	9	28	23	0
AGTTAAATACTTTACTAGTAGTTC	TRCN0000466173	STARD8	156	64	79	28	38	58	105	98	106	84	55	27	32	114	36	16
GGAGAGATGACCTTCCATCATCTG	TRCN0000466174	EEF2KMT	2420	2382	3892	2050	1970	1760	1614	1700	1886	1474	1501	1451	1589	1229	1828	1538
GTCCTATTGGTAATCCGACCGCCA	TRCN0000466175	NEK6	372	343	258	164	232	259	337	318	258	306	306	320	278	322	364	492
TCATGGCTGACTCCCTAGAACATG	TRCN0000466176	HOXA5	984	1057	2231	2314	832	702	582	634	676	775	449	855	593	529	783	808
ATCTAAACCGTCTGAATTAATACA	TRCN0000466177	CEP19	1275	1086	675	950	1049	974	1150	1036	927	913	1003	962	956	891	1152	992
TACAGGTATGTTATAAATGTCCAC	TRCN0000466178	NO_MATCH_226	1928	1937	1477	2065	1479	1513	1220	1463	1422	1164	1207	1556	1354	1208	1397	1035
GTCCGCCGTGTGTGCGCATTAACA	TRCN0000466180	SCGB1D1	2196	2021	1953	1917	1598	1727	1794	1582	1563	1606	1621	1468	1516	1689	1407	1495
AATTAGTGTGTTATCATTAAAGGT	TRCN0000466181	RPTOR	379	278	226	212	302	298	304	327	343	287	338	347	217	243	453	349
TTTTAGATCCCGGACCTCACGACG	TRCN0000466182	LSM3	1086	790	600	752	788	888	910	763	756	790	849	716	808	939	562	771
TGACACACAATCGTTTTGTGCCAA	TRCN0000466183	S100A4	2092	2151	2191	2646	1318	1244	1446	1382	1294	1362	1446	1382	1142	1331	1003	1112
CGATGGCCATGGACCAACTATTAC	TRCN0000466184	C5orf60	24	8	13	0	0	3	0	17	0	12	46	1	20	26	11	0
TTCACTGGCTGTTGGCTATTATTA	TRCN0000466185	C4orf33	1516	1456	1020	1379	1030	1173	1180	1270	1310	1292	1353	1116	939	1153	1319	1224
GTGGGGAATAAAGAACGGCAATAT	TRCN0000466186	SSBP3	2127	1907	1443	1410	1716	1710	1879	1535	1637	1772	1559	1338	1362	1249	1692	1428
CCCAGTATCTGGCGTCAGATTGTC	TRCN0000466188	CCDC47	1594	1602	1137	983	902	1070	1232	1092	856	993	976	1046	998	978	1279	1165
CAATCCGTACGGGATTATAAGATA	TRCN0000466189	SPCS1	2999	2871	3742	3325	2372	1898	1773	2114	2444	2076	2023	1893	1502	1680	1870	1849
CGGCAACGCCTTATGATCCTCGCA	TRCN0000466190	NDUFB3	4566	4470	4835	4293	2730	3059	2705	2945	3017	2845	2816	2993	2645	2714	2480	2734
GATACAAGTAGCGGCCGGCTATGC	TRCN0000466191	HMGN3	1477	1210	1217	993	1010	1168	1050	917	915	854	989	1001	1005	833	1059	838
TCGATCCAGTTAACCTTACAAGCG	TRCN0000466192	PAPSS2	492	484	326	278	304	197	314	380	298	253	293	255	236	197	143	297
TTTCGGACACACCTGAGTGTAAGC	TRCN0000466193	MND1	1869	1573	1341	1349	1420	1629	1292	1448	1455	1228	994	1420	1057	1261	1053	1511
TCCCGTCAACCGGTGAGCTGGTCA	TRCN0000466194	LRRC28	808	735	767	553	632	538	576	630	604	529	514	523	518	606	599	548
TACCCTATTAGCATTCAATTGTTA	TRCN0000466195	COX7B2	1059	950	912	1044	774	713	623	695	726	551	476	610	543	610	539	669
GGCTCTGGCGATGTGCTTTCTCCA	TRCN0000466196	YIPF4	5927	5445	5998	5203	4755	4586	4077	3870	4029	3899	4012	4173	3352	3591	3409	3864
GTTTCGTTATTGTGGGATGTGTTC	TRCN0000466197	NME5	40	31	39	12	34	30	70	54	17	10	14	34	22	55	28	49
GGTGCGGTTGAAACCACCAGGACC	TRCN0000466198	BHMT	162	179	70	172	185	54	191	87	169	138	46	210	66	61	253	88
GAATTTGCATACAAAGTAATAGGC	TRCN0000466199	RPL23A	1083	1015	546	999	831	951	752	803	649	870	752	979	749	1132	864	887
TACCAGCGCGTTCGAGTTAACAGT	TRCN0000466200	ZP2	3664	3494	2359	2189	2403	3022	2932	2270	2178	2148	2163	2292	2264	2241	1974	1740
GCCCTATTCCCGCCCCAGGGAGTT	TRCN0000466201	KDELR3	2012	1799	1529	1589	1454	1763	1593	1428	1385	1427	1363	1109	1545	1644	1390	1679
GCGCCAGCAGAACTCCAGTGTGGT	TRCN0000466202	ITIH3	1942	1749	1462	1514	1481	1622	1600	1229	1599	1163	1343	1351	1076	1348	1225	1266
AGATCGAGCGTACGCGCATGTCTC	TRCN0000466203	ATP6V0A4	201	147	91	79	205	258	146	105	184	161	76	187	154	138	51	137
CTTAAACAGTACTTCGGATAGCAA	TRCN0000466204	CD24	666	645	552	571	370	453	428	331	601	360	394	379	350	349	539	412
TTTTTTTAATATGCCATAACCCTT	TRCN0000466205	PLSCR4	987	613	394	347	1032	938	958	830	753	857	758	965	769	956	899	933
CTACACTCGTTGTGTCCGATGGTT	TRCN0000466206	SLC12A7	1388	1288	1061	1120	946	973	764	927	767	1099	774	908	936	752	857	856
CTGCAGCACCGGACATATTGTTTC	TRCN0000466207	GLRX2	7849	7882	8055	7938	5736	5687	5240	5506	5603	6006	5333	5321	5144	5135	5255	5179
AATCAACGCCCTTTTACGAGTGAT	TRCN0000466208	NO_MATCH_17	1226	1013	783	710	1057	1060	1183	938	899	849	789	876	650	876	941	1114
CGCTTCAATAAGAATATAATTACG	TRCN0000466211	VPS52	32	52	47	47	0	10	10	15	16	0	20	1	56	25	1	111
AGTGAGTCAATGAGACGGGGGCCC	TRCN0000466212	PRAC1	4482	4053	4685	3912	3055	3399	3153	3321	2996	2967	2790	3243	2565	3008	2600	2745
TTGAAGAAATGTACTAGGCACCAT	TRCN0000466213	TMEM71	3242	2782	2414	2536	2575	2613	2271	2466	2499	2476	1885	1736	2180	2393	2179	2597
AGATGCAGCCAGCTGGGCCCCCCA	TRCN0000466214	NO_MATCH_48	557	528	628	639	400	452	453	497	379	381	425	196	362	502	428	402
GCTCTTAGGGGTGCTCGAGCATGC	TRCN0000466215	ATAD2	800	660	507	564	700	491	661	766	610	622	703	579	716	602	469	796
TTTGGCACTTAACCACGTTTAGTC	TRCN0000466216	P2RY11	3040	2359	2244	2214	2519	2384	1732	2156	2513	1894	2018	2156	2023	2173	1875	1954
GAATTAGTACTTTCTCCACGCAGC	TRCN0000466217	TSR2	1998	1560	1317	1324	1696	1543	1213	1486	1747	1394	1603	1826	1186	1217	1422	1797
TTCTTAGGTGGAGGGTGAGCGTAC	TRCN0000466218	NECAB1	1131	984	828	892	854	815	862	935	959	966	761	769	691	804	705	840
GCATTGATCAACGAAACTATTGGT	TRCN0000466219	FAM198B	4488	4001	4210	4270	3481	3391	3513	3422	3404	3730	3004	3272	2569	3396	3357	3356
TGTGCAATCAGTTCCAGCAAAACG	TRCN0000466220	LOC148413	4554	4623	4902	4738	3343	3140	3150	3137	3001	2957	2790	2879	2552	2560	2656	2868
GCACCCTCTATACCCCATTCGTTC	TRCN0000466221	TMEM56	3392	3080	2325	2320	2538	2481	2555	2734	2477	2477	2533	2477	1923	2119	2846	2349
TGGTCTTCTAATGAAACATTTGTA	TRCN0000466222	KIRREL2	2288	2242	2225	2061	1674	1810	1756	1521	1711	1161	1548	1464	1492	1518	1344	1960
ACCATACTTGTCTATGTCGTCGGC	TRCN0000466223	MAP3K12	1722	1427	833	1095	1141	1080	1233	1082	1017	1151	987	915	1164	999	1055	904
ATCAACAAAAATTCCGAGTTCCGG	TRCN0000466224	BOC	2468	1883	1745	1888	1606	1824	1703	1706	1781	1843	1864	1449	1243	1796	1786	1899
ATCAGTCGAGCGAATATAACCAGT	TRCN0000466226	ATP6V1B2	525	539	324	437	513	549	337	382	387	334	452	430	362	408	386	434
AACGACGGACCCCAGCCTTACCGC	TRCN0000466227	RBM42	653	526	416	443	364	409	379	548	534	335	319	304	345	396	344	450
AGCATGCCTTTTACGACAAGATGG	TRCN0000466228	HTR1D	2186	1931	2311	2168	1286	1234	1763	1375	1088	1029	1139	1125	995	1071	1216	1325
TTTTAGATGAATATAGTTATATCC	TRCN0000466229	TTC33	1284	932	570	755	952	1251	1072	1076	1030	862	841	927	870	1183	991	1057
ATAACCAATGATTTCCGACAGATT	TRCN0000466230	SRSF12	1491	1144	1112	876	919	915	855	1005	815	808	749	677	536	793	852	754
GACTTACACAGACTGATTATAATA	TRCN0000466231	ST6GALNAC5	1449	1327	918	1145	1161	1109	1296	818	965	931	1141	839	1009	1128	993	856
TCAATGTACTGGCAAAGTAGGCAC	TRCN0000466232	FKBP6	1518	1535	1494	1387	1196	1322	840	1107	1043	972	993	988	1324	971	1038	1138
TACTGGCTAAGTCGATTACAATAA	TRCN0000466233	CPLX4	2664	2559	2140	2559	1891	2100	1961	2181	1980	1608	1847	1906	1408	2136	1659	2034
ATCTCTCTCTTAATCTTGACACCA	TRCN0000466234	CALCA	1148	966	651	729	960	1018	846	1135	971	1109	949	924	828	757	757	948
TGCCGGTGGAACGACGATTACGGG	TRCN0000466235	SCLT1	3712	4003	4727	4414	2495	2658	2497	2158	2553	2443	2142	2369	2482	2048	2477	1992
ACTTAGTCACAGATACCTCCGCAC	TRCN0000466236	HMCES	3046	2379	2019	2078	2368	2042	2430	2462	2232	1972	2450	1971	1789	2124	2084	2130
TGTGTTGAGTGGGGTGATATCGAA	TRCN0000466237	GOLM1	96	80	54	24	23	128	29	59	111	262	19	42	60	48	25	24
GTTTAAAGCTGATCCAAGAAACAT	TRCN0000466238	RQCD1	31	36	24	40	23	35	28	18	31	89	14	24	78	38	8	85
GCACCCCATCATGTAGGAATTACG	TRCN0000466239	GRIA2	144	142	145	158	50	106	149	174	134	228	140	160	119	31	46	26
CGATCTCTAGCACTTTTATGGGCT	TRCN0000466241	XLOC_010651	1796	1736	1562	1759	1327	1264	1103	1307	1165	1129	1019	1016	1144	1071	1261	1119
TAGCCGCAGAATAACATTGTTGTC	TRCN0000466242	SMAGP	5310	5166	5619	5431	3770	3130	3798	3622	3375	3523	3131	3724	3204	3260	3630	2954
TGTTCACGTTGGCAGACCGGAAGA	TRCN0000466243	BRPF3	1173	1048	603	706	824	702	827	834	580	878	702	467	496	542	620	855
CTGTGTTCAAGGTTCAGCAGTGAT	TRCN0000466244	INTU	5405	4545	3192	3436	3785	4111	3934	4434	4143	3523	3827	3331	3545	3778	3246	3669
CGTGGCCCCGGAGCGGCTAATTGG	TRCN0000466245	NEUROG3	3331	3504	1844	1395	1854	2031	1800	1910	2145	1396	1796	1428	2076	2070	1538	1754
TACACAGCTGCCGTAAATGCAGAT	TRCN0000466246	GALNT2	74	47	24	35	104	14	43	14	39	92	22	88	62	16	15	44
ATCAGCAGGTCACACTGTTGAGTG	TRCN0000466247	NBPF3	1590	1229	970	1016	1303	796	1268	1208	1035	1084	872	962	892	1064	885	1094
ATTTCCTGCGCAACTCTCGGAACC	TRCN0000466248	GPS2	152	63	88	42	52	86	134	84	51	131	23	132	53	71	144	82
TATAGTCATACGTCTCGCGCGTCA	TRCN0000466249	IDS	3317	2788	2438	2313	2317	2369	2295	2295	2013	2227	1938	1779	2038	2197	2021	2085
TAACCGCTTATCTCAGGCCCCCAT	TRCN0000466250	SERPINA1	3368	3248	2659	2734	2330	2521	2027	2392	2106	2650	1998	1976	2073	1792	2274	2426
ACCCCGAATGCTCAGGTGATCTTA	TRCN0000466251	C16orf72	1182	1074	783	915	1007	750	811	660	756	896	914	879	839	714	879	848
AACGCGGCGTAGACCCCGGAAGCT	TRCN0000466252	SERPINB6	1261	1050	770	913	781	1054	984	993	833	906	905	774	617	857	1118	1041
CAACTTTTACGTTTGTATGGATCT	TRCN0000466253	TMEM100	2313	2057	1822	1939	1584	1530	1942	1491	1738	1267	1530	1272	1394	1307	1626	1821
GTGGTTTGCAATCGTTCGATCATA	TRCN0000466255	ZNF521	1517	1350	1475	978	1261	1242	1111	1098	1400	1371	1262	1092	898	1345	1423	1492
AGAATTAAGGAGCTCTCTAGTAAC	TRCN0000466257	CLCN4	499	381	278	255	406	373	445	356	276	328	469	370	419	294	386	447
TGGCTGTGACAGCTATGTGAAGCG	TRCN0000466258	FLJ33534	1261	1431	1852	1375	914	1053	758	1116	1170	723	479	853	638	873	621	931
TGCTCATTAACCGAGATGTATATA	TRCN0000466259	XLOC_013643	2232	2374	2392	2629	1649	1790	1362	1458	1409	1508	1414	1346	1261	1446	1461	1475
ACAACACCCACTGATGGAATCTCC	TRCN0000466260	PHF6	2997	2572	2260	2233	1863	1934	1986	1806	2034	1660	1942	1782	1796	1220	1645	1490
CCATGCGCAATTCTGTAATAGGCG	TRCN0000466261	LCN6	2213	2193	2643	2593	1596	1372	1222	1499	1468	1240	1485	1402	1262	1364	1213	1569
AGGCACCTAGTCAATTGGCTGAAC	TRCN0000466262	CCDC60	1008	820	614	530	486	783	649	730	707	705	537	680	413	469	421	799
GTCGTATTTAGCCCTAATACTCGG	TRCN0000466263	GAGE1	2361	1953	2076	1552	1951	1783	1620	1851	1389	1512	1678	1677	1695	1450	1464	1367
GACTTCAAATAAATAGCTTCACTC	TRCN0000466264	TUBA1A	2014	1991	1266	1648	1698	1709	1872	1715	1808	1653	1705	1813	1565	1342	1619	1613
GTAAGGTTTGTACATCATTCAATA	TRCN0000466265	HERPUD2	1814	1534	1175	1157	1454	2792	1223	1353	1012	1112	1353	1239	1015	1138	1001	1077
CATTGAATCTTCATGTCCCACCAG	TRCN0000466266	ACKR2	2684	2662	2275	2484	1978	1982	2303	2059	1808	1832	1996	1757	1696	1849	1796	2194
GAATAATCCGTTCCGCGCGCTTAT	TRCN0000466267	MRPL23	1312	1031	833	727	1135	912	1044	1150	1036	1145	752	873	817	861	982	926
GGCCCTATAACGGGCCCAATGTCC	TRCN0000466268	PCCB	502	389	243	209	397	486	452	466	401	411	352	342	439	334	353	439
CAATTACCCGTTGGCGTTACTGCA	TRCN0000466269	OGFR	439	326	301	204	199	232	201	343	310	201	253	277	307	180	121	327
TGATTATCATCGAGACCCGACAGC	TRCN0000466270	MAP7	9	31	42	25	56	2	0	37	1	21	5	21	37	19	0	0
TAGGAATTCTAGGAGGTCCACTAG	TRCN0000466271	KRTAP10-1	8156	7300	6427	6439	5909	5815	5814	6740	6293	5134	5187	4954	4518	5498	5331	5264
ATCTTCTCATTATAATACCATTGG	TRCN0000466272	CRCT1	3153	2192	1767	1670	2554	2695	2462	2433	2621	2219	2192	2090	2181	2085	2196	2416
GTGCAGATCGGTCTCTATCGGCTT	TRCN0000466273	ZNF484	284	259	162	128	221	162	203	317	294	316	304	175	130	125	160	164
GCACAGGACATCCCGTTACCTTTA	TRCN0000466274	FAM160B2	383	347	288	310	128	349	199	143	336	286	231	289	297	197	229	355
GACAACTTTTGTCCTCCGTTCTGC	TRCN0000466275	SMCO4	1203	1034	1128	1551	839	909	881	906	915	852	1067	684	799	826	760	672
TCAATTGTATCAAAAATTAAGTCA	TRCN0000466276	Epb4.1l4a	1490	1341	1348	1638	1339	1177	1179	965	1045	892	856	1023	1023	711	1028	1298
ACCACGTATTGTGGCGGGGTTCAA	TRCN0000466277	THAP4	227	200	201	137	97	114	169	200	145	156	123	166	175	136	144	130
TCGTCGCATGACCCCCTGATAATT	TRCN0000466278	RCN1	650	595	582	721	327	447	364	483	444	693	482	608	473	276	440	414
ACCACACCCAGACGTTCCTTTATC	TRCN0000466279	TFIP11	518	363	256	206	369	464	192	318	198	238	233	243	138	326	314	403
AAAATAGAGTATAACAAAGCAATT	TRCN0000466280	LZTS2	77	46	17	29	105	114	73	108	42	84	78	0	40	27	36	53
ATGCGAGTTTAAATCCTACAAGTC	TRCN0000466282	CALHM3	961	747	692	535	602	909	780	799	677	628	720	846	601	639	691	690
ATCAGTCGGTATACTGACAGGAAT	TRCN0000466283	DHX29	0	0	3	1	0	0	0	0	0	0	0	0	0	0	0	12
TTCCCATGAGACACGCAACATGTA	TRCN0000466284	SYT1	2322	2054	1521	1493	1532	1781	1659	1671	1674	1708	1165	1547	1392	1304	1372	1825
TGCTGCTAACGTGGTAAGAACGAG	TRCN0000466286	SERPINF1	1870	1771	1548	1721	1306	1413	1282	1103	1288	1354	1084	960	870	1264	1038	1048
GAAACGCCTGAGTCGGACGTTTTA	TRCN0000466287	MKS1	1328	1071	765	763	1121	1183	1130	1032	1120	880	872	768	919	928	779	1016
AAGTCCGCGGCTTAGCAAAGCCGG	TRCN0000466288	EWSR1	1109	936	773	731	834	858	1103	904	791	828	971	711	623	676	754	707
GTAGTCCGCGCCAGGCCCGACATG	TRCN0000466289	JMJD1C-AS1	0	0	0	0	0	7	0	0	0	0	0	4	0	0	0	0
ACTAATTGATGGCGTAAGAATCCG	TRCN0000466291	DYNC1I1	934	743	372	563	617	736	606	823	500	548	558	625	413	491	503	616
CTATCTGCAGCAGGGTTCGCCTAG	TRCN0000466292	ALDOC	1773	1886	1402	1526	1577	1624	1402	1276	1116	1238	1300	1191	1186	1251	1437	1421
TCCCCAGATCCGTAGGAGGAGATA	TRCN0000466293	PDCD1LG2	2341	2019	1761	1839	1552	1535	2017	1860	1469	1353	1384	1730	1162	1528	1198	1365
TGCATTCGATCGACAGGTTTTAAA	TRCN0000466294	CDC42SE2	887	909	733	808	828	697	456	370	587	588	481	557	420	443	572	473
TGCCTTCATATACCCTGATGACTT	TRCN0000466295	FUK	83	80	68	74	56	18	42	82	79	21	17	76	14	50	27	62
GTTGCAAGGTCCCATCCCTAGGTC	TRCN0000466296	SHD	771	665	579	487	639	646	566	456	496	567	639	552	446	445	466	415
ATAAGGGATATTGAACAACTGAAC	TRCN0000466297	BTF3	1605	1374	1183	1268	1309	1317	1296	1325	1305	1273	1086	1036	1141	1067	1107	880
ATGGATTAGCTTCGCTAACGGTTA	TRCN0000466298	TSEN54	558	401	255	294	310	470	396	421	336	501	338	413	454	347	288	475
GCGAATTAGCAAAAGAGCGTCGAG	TRCN0000466299	ATRNL1	436	421	364	285	325	208	400	263	235	316	238	169	258	251	265	199
CGGCAGCAAGTCATAGCTCGCCGG	TRCN0000466300	DCBLD2	803	856	389	537	613	656	640	594	330	384	549	392	738	466	447	443
CAAAGGACAATTCCCCTACTCTTT	TRCN0000466301	CDC42EP4	2608	2369	2366	1856	1810	2254	1750	1731	2532	1584	1598	2184	1665	2254	1570	1846
ACAATTATCATTACTCACCGTGAG	TRCN0000466303	TRIM31	3619	3224	3100	3183	2670	2779	2727	2661	3031	2688	2679	2322	2472	2435	2301	2331
TGCATCGCAGTTCCCCTTGCGCGT	TRCN0000466304	LRRFIP1	3517	3659	4312	3666	2171	3044	2182	2248	1997	2246	1969	2378	1783	1946	2185	2217
CGATAGACTCGCTCTCTATTGGCC	TRCN0000466305	ARSG	681	628	411	508	229	560	367	341	448	297	319	289	275	489	194	438
CTAATCTCCCGAAAGCCTCATTGA	TRCN0000466306	PIP4K2C	1346	1343	1123	1068	798	1052	981	995	659	1116	1081	803	844	849	748	932
AACGCATCCACTATATGTGTCCCA	TRCN0000466307	DTYMK	796	731	645	592	629	641	771	646	611	573	880	664	475	497	716	671
TGTTCCGATGTAGGCGTAGCGGGT	TRCN0000466309	RPL14	978	1061	1094	1103	838	620	693	741	501	916	564	841	893	615	784	681
ATCCCTACTCATTCACACTAAGCT	TRCN0000466310	RAB17	2300	1756	1437	1476	1878	1727	1893	1818	1394	1620	1442	1521	1322	1708	1508	1528
AGTAAACGTTTAATAATTGCACTC	TRCN0000466311	IL20	1585	1392	1031	947	1395	1099	1651	1165	1059	1023	1126	873	1037	731	1046	1055
GGGAGGACGGGTCATTGCGTAGCG	TRCN0000466312	CRCP	2592	2283	2577	2250	1403	1683	1487	1794	1903	1435	1385	1698	1476	1887	1738	1453
TTCGTATGTTCCAAAAAACCTTCT	TRCN0000466314	IFI16	597	536	291	375	454	470	466	467	488	466	332	676	316	445	482	432
TCTCCCTCGCTCACAACAGAAACA	TRCN0000466316	PEX11G	6144	5500	5278	5023	4837	4835	4894	4060	4339	3870	4341	4364	3481	4095	4098	4269
GGGCATCTCTCTGCAGTCTTGACA	TRCN0000466317	C6orf203	6434	5993	5439	5726	4448	4685	4133	5041	4497	5099	4038	4836	4358	4195	4068	4225
GGTACTTTGACGCCGCGTTAGGAC	TRCN0000466318	PRPF40A	4126	3692	3556	3713	2902	3414	2843	2882	2910	2865	2860	2436	2938	3344	2596	2995
GCTCTTGCTCTGCGATCATTGGTA	TRCN0000466319	KPNA2	581	393	396	284	325	420	538	512	463	451	488	579	256	374	388	387
CGGCAACGTTTCCTCTTTTCCCAT	TRCN0000466320	ELP2	13	6	4	0	0	0	0	0	0	0	12	43	0	0	0	0
TGTCTCCACTTATTGAAGGTCAAG	TRCN0000466321	NDUFS3	95	87	67	45	27	52	31	58	25	44	16	55	19	60	106	164
CGCACACTCACTTAATCGTGGATC	TRCN0000466322	PCDHGA5	506	552	187	334	311	372	401	424	251	414	384	272	171	329	229	338
GTATGATCAATTGCGAAGATATGC	TRCN0000466323	NO_MATCH_208	4465	4075	4235	3494	3818	3911	3670	3953	3658	3728	3018	3223	2989	3024	2922	3523
CACGGACAGTCGCTCTGTAAGGGC	TRCN0000466325	MAP4K3	996	1193	993	1262	777	786	787	914	737	626	737	806	732	503	660	702
AAAATCACCTATTCTTTGCGCTCG	TRCN0000466326	LAMP5	209	121	108	101	234	204	110	305	199	241	182	201	73	162	115	160
CTTCTATGCCATAGGGAACGGAGT	TRCN0000466327	RNF144A	1187	1037	1068	823	750	908	779	903	1096	755	720	709	661	1058	838	791
AACATCCTAACTACGGTTTCCGAG	TRCN0000466328	PEMT	537	387	251	425	462	311	318	344	447	384	287	259	241	286	412	321
CAAGTTTAACCACGTTAGCTCTGC	TRCN0000466329	CYP2J2	1897	2076	1727	1909	1269	1549	1066	1420	1348	1167	1303	1025	1153	1385	1385	1336
TCACCGTCTCGAGAAGACCACTGA	TRCN0000466330	PDLIM7	2675	2577	2506	2315	2096	1736	2093	2117	1772	1830	1665	1743	1425	1613	1782	1333
ATGGCGATGTCGCCTTACTAGACT	TRCN0000466331	C10orf54	2469	1881	1718	1620	1857	2062	1926	1954	1823	1851	1484	1612	1503	1804	1994	1455
TAGGTTGCAGCCCCCAGTGCCACG	TRCN0000466332	QPRT	4803	4367	3833	4297	3431	3338	3364	3353	3218	3257	2828	3013	2499	2831	2826	2957
TGGGGTTTAATTGCATTCTTGTTA	TRCN0000466333	HIST1H2AG	2873	2743	2816	2494	1999	1980	1464	1596	1459	1869	1610	1455	1786	1351	1400	1772
TCCTCCAGAACTTACTGAGGACAC	TRCN0000466334	MMP10	2409	2225	1849	2193	1686	2174	1726	1956	1386	1805	1516	1741	1548	1623	1340	1704
AGATTATGACGAGTAGCCTTGCAA	TRCN0000466336	VAMP3	2424	2073	1771	1994	1673	1623	1566	1593	1521	1766	1800	2005	1612	1543	1579	1589
GGTCCACCCAGTTCAATATTGTTG	TRCN0000466337	RNF133	1753	1568	1137	1517	1346	1631	1490	1163	1342	1344	1163	1165	825	1203	1128	1281
TTCTTCGAGTTTGTCCCAAGCACA	TRCN0000466338	XLOC_l2_005179	1000	824	664	768	805	849	658	621	778	665	628	646	727	807	758	748
AGCCGATGTTGGCGCCACTGGTCA	TRCN0000466340	FBXW12	1562	1414	1317	1136	1273	1136	1006	1156	874	868	1236	1207	723	884	883	831
AGCACCTTTCGTAAGCCTAGTAAC	TRCN0000466341	CCHCR1	457	372	232	214	298	409	491	249	379	151	185	253	261	268	236	269
ATGTCCCGGCCCCCCTTAATCACA	TRCN0000466342	FHL2	1075	831	686	714	743	851	1007	759	611	718	770	833	679	777	800	625
ATACCCAGAGCCGAATTACCGTCC	TRCN0000466343	ZMAT2	1550	1476	1354	1309	1495	1251	1193	1251	1507	1312	1070	1329	1136	1071	1420	1495
TAAGTATACCTCGAAAATATCCGC	TRCN0000466344	NO_MATCH_223	2221	2100	1903	2313	1904	1887	1785	1974	1700	1563	1606	1725	1674	1347	1879	1530
CGCAGGAGGCATCCGCAAAATCTA	TRCN0000466345	RAB40B	2978	2810	3948	3491	1996	1528	2078	1878	1880	1468	1344	1758	1578	1567	1545	1505
AACTACCTCTTCTATCTATCTCAT	TRCN0000466346	TRMT61B	284	273	184	219	178	318	262	389	145	225	316	195	290	246	231	220
TTATATGGTATAACTAGCCCGCGC	TRCN0000466347	C1orf109	2362	1833	1717	1535	1641	1779	1829	1696	2017	1513	1764	1949	1327	1727	1907	1939
ACCGAATTAGGCCTTTTTCGACCC	TRCN0000466348	GLYCTK	919	836	637	478	644	717	647	570	598	604	334	621	684	464	684	784
TACCTGATAATGGCACCATGCAAA	TRCN0000466349	DEFB129	2641	2487	2387	2413	1871	2008	2232	1606	2027	1597	1798	1831	1718	1635	1623	1848
AGCACCGTACTCTTATGAAATACT	TRCN0000466350	EMC3	3001	2869	2705	2745	2218	2138	1901	2292	2460	2223	2395	2263	1785	1686	1915	2135
CCCACTCAGCCTAGGTGTAGATCA	TRCN0000466353	SKP1	162	206	150	176	34	211	112	91	81	47	102	141	102	127	73	91
TTCTAACCCCTTTGTAGACCAATG	TRCN0000466355	HIST2H2BF	4835	4216	4129	4437	4187	4128	3759	3774	3331	3556	3646	3217	3251	2981	3588	3609
GTAGACCCTATCTTCCATAATCCG	TRCN0000466356	CABP7	974	937	853	894	785	665	863	613	641	637	618	571	591	1150	780	764
ACGACATTCAAGTGTACCCTATGC	TRCN0000466357	UCP2	1403	1277	1272	1039	959	896	1205	1103	853	1118	801	1210	936	940	981	991
AGGTGGTACATCCGCCGCACTACC	TRCN0000466358	GDE1	1483	1386	1288	1090	1370	1245	1429	1040	1178	1332	788	1113	764	1126	1061	1083
ATCCGAGGGCGAACACCGCACGGC	TRCN0000466359	ZNF473	207	166	183	89	201	145	137	136	125	184	185	63	54	74	113	35
AACACTTTGTTCCTTAGACAGTAA	TRCN0000466360	RPN1	553	430	227	383	297	338	508	374	292	250	376	498	335	504	451	357
CATATCCCTGTTCATGTATCTACT	TRCN0000466361	PINX1	1011	854	759	923	547	556	622	887	964	739	494	494	693	490	825	807
CTCCACGGCACCAAGATTTTCTAG	TRCN0000466362	SLC1A7	3607	3686	4028	3864	2608	2665	2894	2238	2684	2500	2519	2178	1468	2189	2332	2188
CCTGGGTTTACAGATGTGGCTTAC	TRCN0000466363	ARAF	790	782	662	616	418	687	522	581	291	514	458	417	322	367	524	433
TTAGGTTTCCAGCGTTGTGTGGTT	TRCN0000466364	Rbm5	1717	1539	966	1140	1504	1112	1338	1283	1256	1455	1274	886	837	1084	1087	1330
TCGCTTATATTCATGCGACGACGA	TRCN0000466365	CPB2	2439	2064	1907	1966	1879	1887	2053	1898	1688	1682	1614	1978	1607	1360	1481	1599
ATTATTCCTATCCGAAATTATCGA	TRCN0000466366	KMO	861	561	495	352	600	651	741	623	727	736	713	660	460	624	611	914
TTTCTAATATATTCGTGTACGTCC	TRCN0000466367	ERCC2	1212	883	693	639	986	1064	914	927	868	968	803	914	797	871	886	1144
GCCCGCTCTGTAGTCCCCTGTTCG	TRCN0000466368	TAS2R43	361	320	275	393	256	338	245	300	314	213	216	315	324	217	244	382
CAAGTAGTGCTATACTTATTTTTT	TRCN0000466369	KAZN	1516	1408	1475	1739	928	1141	1150	1026	867	1090	1123	1365	1009	1222	933	953
CAGCCAGTACCTGTGCTGATGCGT	TRCN0000466371	RNF214	674	598	442	477	490	395	572	445	397	492	377	260	428	346	493	250
CGACGTAGGTTATGCAGATCAGCA	TRCN0000466372	SLC41A3	1864	1990	1616	1747	1125	1241	1716	1249	1542	1267	835	1288	1302	1375	1301	1205
TGCGCTAGCTCGGAATTCCATATT	TRCN0000466373	PIGO	1650	1839	2062	1617	1121	1403	1193	1330	1084	1077	1344	1101	1135	1122	1089	1224
TAAGCGAGCACCTAGCTCAGCAGC	TRCN0000466374	MRPS34	1161	1040	807	941	846	648	743	913	754	753	709	755	737	740	765	579
TCTCACCGTAGCTGACGCTTGGAT	TRCN0000466375	NO_MATCH_253	671	632	572	574	476	569	527	464	426	413	350	423	382	555	306	576
ATGGGATTTGGGGATCTCGTGGGG	TRCN0000466376	ESAM	1074	926	629	599	812	877	971	881	638	927	607	630	751	553	727	688
TGATTTCAACACTTCATTTTCAGG	TRCN0000466378	ZNF562	1460	1245	965	908	956	828	1163	1345	1108	1140	933	1309	908	1042	901	798
TATTTTGTACGAACGAAAATCAGA	TRCN0000466379	CLEC11A	1317	997	1063	827	710	569	654	901	864	719	553	495	544	500	533	656
TGAATAAAGTGCCTTTAGTGCACG	TRCN0000466380	ETV7	2095	2169	1963	1689	1374	1055	1279	1516	1324	1181	1411	1266	1054	1154	1315	1391
ACCCGAATTGGCAACAGCGTTTCA	TRCN0000466381	ZNF776	6341	5996	6279	5346	4679	3969	4416	4308	4196	4355	3929	4609	3848	3803	3879	4337
ACTACCCGATGGAAACATAATCTC	TRCN0000466382	ZNF75A	3259	3027	2961	2846	2335	2557	2404	2593	2212	2493	2058	2319	1906	2132	1836	2142
GCGGTCAGTCATATGCATCAAGCC	TRCN0000466383	LURAP1L	3644	3581	3650	4018	2908	2435	2523	2640	2901	2578	2515	2626	2472	2112	2728	3528
ATCACAGACGATGAGCTCGGCGGG	TRCN0000466384	NFYB	2528	2242	1439	1426	1447	1538	1380	1562	1171	1237	1012	1340	894	1072	1143	1386
CTTCCCTGGATGTTGGCCAAGCCC	TRCN0000466385	QSOX1	747	618	350	461	443	572	455	415	384	589	527	424	419	489	509	442
TGGGCATATTGCTTGCTGACCTTC	TRCN0000466386	FAM126B	1393	1827	1612	1478	1040	1084	1184	1195	1220	1279	1106	1143	1130	959	1041	876
CTCATTATCTAAGCCTCTACTTTC	TRCN0000466388	MMP28	1482	1531	1311	1512	1132	918	837	988	1063	1067	878	1098	843	1057	1030	885
AAGCCATGTCATCTTGGAAATTCA	TRCN0000466389	GTPBP3	333	291	187	365	208	224	279	230	235	253	234	225	259	220	217	177
AAGGCTTGCCAACCGTAACATTCA	TRCN0000466390	MFGE8	1268	892	673	682	1061	1004	898	851	1120	933	819	1105	966	739	801	903
ACACCCCTGGCTGACGACTGACCT	TRCN0000466391	CST9L	2298	1973	2034	2193	1604	1818	1571	1582	1946	1759	1354	1851	1128	1321	1853	1438
CCCCACCTGTCGTCTGTACTGGGC	TRCN0000466392	FASTKD1	0	0	0	0	0	0	0	0	0	0	0	0	0	0	0	0
AACCAAAGCCTGTCAGTGAGCACC	TRCN0000466393	FAM64A	2399	1930	1744	1740	1962	1833	1838	1535	1701	1548	1700	1772	1520	1567	1482	1575
GCCCACTACAACATAGGCCAAATC	TRCN0000466394	TRMU	1908	1931	1590	2900	1305	1569	1750	1369	1405	1501	963	1295	1358	1244	1190	1657
ACACTTCCGAAAATTGCCGAATAG	TRCN0000466395	RPL18A	2091	1848	1509	1824	1277	1296	1235	1489	1099	1580	1577	1471	1031	1276	1136	1084
TAATATTCTTGAAAAAACGAAAGC	TRCN0000466396	NPBWR2	2838	2688	2093	2012	1891	2416	2238	2487	2340	2372	1974	2407	1875	2145	2327	2279
GCGGGGGCGTGTGCCAGAGAATTC	TRCN0000466397	LOC102725009	5421	5321	6038	5621	4250	3589	4563	3820	3666	4305	3480	4280	3165	3984	4138	3457
ATATTAAAGGTTTTTGACCAAATC	TRCN0000466398	NR2C2AP	1568	1303	994	1112	1393	1160	1279	1236	1298	1234	1447	1238	956	1241	1203	1355
CACGCAGTGAAGCGAACATACAAT	TRCN0000466399	MTPN	4787	5201	5736	5951	3712	3353	2741	3183	3233	3684	2679	3305	2863	3387	3246	2869
ACTGGCATTTTCCAACAGAGTCGT	TRCN0000466400	LFNG	3552	3248	2563	2747	2677	2995	2553	2683	2445	2317	2344	2633	1935	2329	2508	2982
TCATGCTGCGCCGTGGGACTGTGA	TRCN0000466401	MRTO4	2268	2037	1770	1900	1653	1760	1389	1334	1663	1752	1572	1285	1608	1389	1258	1483
CGCATTGTGCCTACTAGATGATTT	TRCN0000466402	NAV1	197	169	93	77	163	175	46	83	73	64	136	119	66	50	55	134
ACCTCCATATTTTCATCACTCAGG	TRCN0000466403	PENK	105	59	39	35	16	33	32	18	9	55	50	56	35	42	48	40
CGGCTCATCTACCAGAGCAAAGTC	TRCN0000466404	NYAP2	7449	7553	8406	7394	5310	4580	4780	4434	5011	4750	4200	4627	4122	4277	5536	4987
ACCATATGAGGTGATTGCTCGCAG	TRCN0000466405	LYPD2	7364	6721	6961	6597	5466	5087	4856	5267	5131	5424	4495	4268	4283	4453	4976	4599
GGGGCCTAAGAACTCTCCTGGCGG	TRCN0000466406	TMEM257	4034	3838	4321	4315	2462	3037	2649	2457	2808	2628	2521	2701	2273	2526	2468	2776
CACCGCCTGACGTTCTTTGTTAAC	TRCN0000466407	FYB	586	550	336	613	266	500	351	298	257	741	611	407	412	294	314	407
CATAACCCCACGATCCTAGGATCT	TRCN0000466409	CLCNKB	19	13	9	23	1	28	3	9	1	13	0	19	6	39	12	10
AGAACAACCTTTAAGGACCCCTCA	TRCN0000466410	FAM171B	8	4	1	0	0	4	0	10	20	33	0	23	3	1	39	0
TATATTGGGTATTTTGACCGTTTA	TRCN0000466411	FAM64A	2938	2703	2277	2619	1810	2154	2381	2190	2354	2189	1937	2329	1581	2059	2016	1975
AAACCCCAGAACTGAAAACCACAG	TRCN0000466412	COPZ1	1550	1359	1312	955	1061	1189	1093	1342	1503	1330	1129	831	979	1040	1122	988
TGATTAATGCACCGATCGCGCCCA	TRCN0000466413	SNX7	57	67	137	66	49	48	84	50	51	123	26	336	52	29	75	32
ACACGCGACTGCCCACTGGCATTA	TRCN0000466414	LPCAT2	2384	2081	1320	1383	1756	1890	1757	1732	1629	1495	1761	1664	1307	1598	1702	1696
GCTTAATCACGATCCCCAGTTCGC	TRCN0000466417	RABGGTB	145	114	76	71	180	105	102	76	70	105	106	84	72	94	141	151
ACAACTCCCGTATCTCCTGCTAAG	TRCN0000466418	LYRM5	2110	1810	1633	1600	1573	1429	1394	1388	1330	1796	1354	1405	1152	1715	1434	1173
TAAAGTGCATACCCCAACCCCCTG	TRCN0000466419	ADAM33	4828	4769	4518	4734	3581	3773	3466	3698	3330	3305	3070	3163	3083	3498	3774	3079
GCAATCTAATCTTAACTCCGACAA	TRCN0000466420	ZNF333	2204	1974	1598	2122	1665	1711	1619	1539	1417	1936	1583	1528	1235	1478	1774	1988
ATCTAAGACTAACAGACATACCGA	TRCN0000466421	NO_MATCH_72	1970	1454	1285	1390	1658	1686	1452	1691	1485	1247	1361	1195	1131	1227	1343	1561
CACAAGGAGCGTGCCTGTATGTTT	TRCN0000466422	RASGEF1A	911	781	1112	700	643	674	710	673	639	516	385	531	549	567	886	584
AACTCACGTGGACCACTCCTAGTT	TRCN0000466423	UQCC2	1283	1095	920	799	1153	923	892	921	995	967	919	883	732	902	1034	1185
CCACTCATTTAACGTTGCCGGTAC	TRCN0000466424	MSRB1	4044	4012	4469	4102	2909	2719	2759	2901	2794	2859	2266	2879	2390	2446	2694	2278
GACGCTGTGCCAATAAGTTACAGT	TRCN0000466425	NO_MATCH_165	1496	1397	1620	1152	1252	982	1018	889	1116	1172	1004	972	896	784	1016	894
TGGAGAAAAACCACCTATAAAAAA	TRCN0000466426	ING3	1927	2118	2439	1942	1384	1387	1453	1302	1529	1619	1191	1067	1094	1229	1432	1471
GTATGGACTATCGCGATATGCGCC	TRCN0000466427	MYH7	441	382	326	409	355	285	336	350	438	255	195	268	332	331	271	341
TCGGCCCCACTTCGGGATTGCTTT	TRCN0000466428	ZSCAN29	34	30	8	19	20	52	73	26	36	8	19	41	0	0	15	62
GAGGTTACATCCTCATACAAACTT	TRCN0000466429	CD79A	1230	1090	997	869	1093	1129	948	1420	934	868	757	968	819	840	861	1234
AGCAGCAGATACCCGAAGAAGGCT	TRCN0000466430	DNAJC3	1295	1240	873	745	819	1031	971	688	1022	650	583	537	594	889	730	774
CCGTTCGTGAGCCTCGAGTCACGG	TRCN0000466432	SEMA4A	342	299	161	334	133	159	265	153	128	192	127	169	171	197	197	236
GCAACTTACGGCCTCTTTCCACTC	TRCN0000466433	MARVELD3	972	963	933	588	610	803	612	512	621	382	676	513	607	429	496	463
AACCCTTGGCCCGCGGGCGGTGGA	TRCN0000466434	GTPBP3	1019	776	577	513	648	812	785	637	782	876	645	721	600	595	614	731
ATATCCCCTTTTAAAGCCCAGTTA	TRCN0000466435	DRD5	1393	1107	685	744	1094	1532	1000	1152	978	1051	1051	862	1004	1075	975	1048
TCACCGGCGCTGAAATTCTATTTA	TRCN0000466436	CS	1724	1808	1634	1536	1158	1351	1151	1520	727	1552	1189	1058	1118	1200	1340	1254
GGCACCAGGAAACTAGGGGTGTGT	TRCN0000466437	TUBA1B	6755	6854	5138	5450	4899	4681	4792	4550	6234	5500	5760	5035	5116	4072	4460	4478
TTAATCGCAATTCTTCAACCCGCT	TRCN0000466438	ARAF	580	400	287	360	447	370	496	338	321	345	166	308	320	308	242	264
TTTGATTTCATTTCTTTCGAACAA	TRCN0000466439	CDK18	331	246	190	192	228	301	250	269	247	199	219	138	139	259	308	153
TACTAAGGAGAGATAGGTAGTATC	TRCN0000466441	LOC100507855	877	838	677	766	566	842	615	600	901	588	618	751	570	459	620	674
ACTGTCCGAGGTTGTACACATTTT	TRCN0000466442	UGGT2	1870	1600	1325	1606	1592	1237	1518	1549	1217	1495	1471	1354	1252	1379	1330	1346
ACGAAGTCACGAAAACGCAACGCC	TRCN0000466443	EPHX4	913	912	868	928	656	792	712	870	546	665	702	631	473	515	626	598
ACTATGTCCATGACTCATCATCGT	TRCN0000466444	L3HYPDH	2263	1946	1576	1623	1728	1808	1787	1607	1884	1667	1631	1492	1246	1720	1807	1556
TCTTTACTTTACGTCATCATTACA	TRCN0000466446	RPS6KA5	347	310	156	159	326	270	403	123	341	217	266	300	200	260	125	810
ATGTGTTTGCCGCACGCTGACCGC	TRCN0000466447	CPT1A	4	1	2	1	3	0	0	0	15	0	0	1	9	6	0	15
TAGTGGCTGCGCGCGAACTGTACT	TRCN0000466448	SLC25A51	7387	6977	7084	7296	5481	5340	5204	5338	4960	5237	5099	4560	4455	4690	4449	4954
TTAATAGTTGTAGCCACCCTTCGC	TRCN0000466449	LINC00895	8169	6962	6176	6639	6082	6249	6140	6190	6329	6601	5672	5650	5242	5235	5524	5927
CCACAAACCCTCTGGAGTAGCACA	TRCN0000466450	ANO4	747	736	488	476	614	416	607	620	626	454	551	375	506	681	494	409
CGTTCTAAGCAATTTTCCATACAT	TRCN0000466452	GRHL3	49	50	15	24	25	44	18	16	46	0	20	72	19	16	19	23
AAAATTTTCTGTCCTGACGAACGA	TRCN0000466453	PLP1	25	17	22	3	22	31	33	14	35	41	4	24	16	9	23	1
TCACCCCCGGCTCTAACTCCCCCA	TRCN0000466454	TMEM140	3332	3192	3572	3903	2501	2388	2338	2464	2640	2634	2246	1918	2083	2572	2167	1882
TCTTTCTTTGGGTTTCAATTTTCG	TRCN0000466455	C1orf35	1102	868	790	724	977	796	874	662	775	770	875	913	746	691	874	708
ATAAGGACCTATTCCTGCGACAGC	TRCN0000466456	LYZ	468	353	449	270	414	288	361	465	332	428	259	329	181	202	379	386
AACTACTTCACAGAAGCTGCCCAC	TRCN0000466457	S100PBP	973	807	457	548	701	861	877	742	755	704	727	570	679	670	674	720
TCTGAAACATAATAAAATAAAGTG	TRCN0000466458	DEFA5	1434	1204	1036	1107	849	989	1114	1075	787	759	726	828	883	930	910	901
CAATTACAGAATAACGTAGCTAAC	TRCN0000466460	KLHL23	657	586	431	303	337	345	295	310	450	190	642	194	316	293	481	216
ATGATATAAATTGCTGTAGTTGTT	TRCN0000466461	GSDMB	536	474	269	310	626	507	532	622	561	380	418	406	416	504	513	421
GCTACCTTGAACTAATTTCCGACC	TRCN0000466462	ELOF1	1475	1408	1456	1672	1276	1055	848	1125	1269	1243	1067	1017	1192	1070	1122	1170
TGAAACAATCAAACCGGCTCGCCA	TRCN0000466464	RUSC1	2010	1989	1527	1838	1475	1309	1330	1210	1403	1351	1056	1324	1082	886	1376	1054
GAAGCCTCCCAGCCAACGATTCGG	TRCN0000466465	MDFI	911	899	856	672	634	605	712	836	572	627	498	994	611	614	846	419
GTCGAGCAATGCAAGTCAGTGTAT	TRCN0000466466	PSMB5	2053	1790	1597	1828	1438	1492	1722	1243	1457	1560	1466	1427	1316	1238	1639	1536
CGAAAGTAAATCCTGTTAATTAAT	TRCN0000466467	ZNRD1	1589	1671	1528	1600	1344	1406	904	920	884	983	1122	865	1125	980	1316	958
GGGGTTCACCTGAAACCGACTACA	TRCN0000466468	C8orf4	2469	2446	2540	2677	1818	1603	1912	1806	1659	2239	1546	1709	1530	1662	1437	1279
CTGTGTCCCTAGTTCAGGGCGGGA	TRCN0000466469	DUOX1	2706	2222	2072	2384	2056	2102	1871	1467	2107	1977	1651	1539	1627	1672	1600	1795
ATGAACCTACGTTAATCAGAACAT	TRCN0000466471	SYCN	2484	1903	1642	1658	1972	1885	1941	1799	1674	1924	1705	1705	1515	1933	1972	1570
ATTCCGTGTCGAAGTCTTCGCCTG	TRCN0000466472	MAATS1	329	244	118	125	182	309	250	221	217	253	187	180	137	137	244	208
CCTCCGAACACCAGAGGGGATAGC	TRCN0000466473	RNF130	291	332	319	367	215	218	248	411	316	342	205	538	201	236	331	99
GGTTATCGTATTAGTCCACTGGGC	TRCN0000466474	PQLC2L	2423	2142	2309	2266	1947	2161	2159	1693	1530	1605	1773	1620	1537	1958	1809	1647
AGGGGTTTGCTCTTCAAAACCCAT	TRCN0000466476	PNPLA8	166	131	62	51	144	202	109	230	75	35	82	129	20	163	172	50
ATCGGAGGAATCCGAACGGGGTTG	TRCN0000466478	SLC52A2	206	177	174	107	142	249	138	140	96	162	173	158	163	144	162	70
TATGCTCGCCCTCGCGTCCTGGCA	TRCN0000466479	ZSCAN32	1757	1584	1763	1537	1159	1510	1603	1290	1235	1472	1282	1208	952	1120	1317	1411
TCTCATGTGCTTTGCTCCACACAT	TRCN0000466481	NEK9	275	237	106	200	266	227	372	113	142	157	398	348	136	238	219	183
CTGGCTGCCAGCGCATTTACCTTT	TRCN0000466482	STRADB	1142	1294	1247	1182	1008	992	886	895	977	976	862	807	975	702	830	901
GGAACTTTCTGTAGTTCGAACAGC	TRCN0000466483	ZNF124	1469	1310	889	1173	925	1420	1035	974	880	899	969	901	715	1152	1019	878
CGAACCTTAAACAAAGCACCCGAA	TRCN0000466484	ENSA	3512	3940	4760	4426	2970	2884	2357	2424	2261	2285	2430	2285	1920	2346	2240	1682
TAAAACAGTGGTCAGGCCGCTACT	TRCN0000466485	PIP5KL1	997	831	818	739	743	739	592	828	628	595	870	656	483	721	762	601
ACCGAGTCCGAATAGTTTATTCAG	TRCN0000466486	HOOK1	687	591	313	298	664	460	436	485	390	333	510	458	512	429	444	524
CCAGTCCTCGGCGCACGAATAGGT	TRCN0000466487	ERF	1374	1282	836	822	708	868	1083	761	616	479	882	709	613	817	572	578
ACAATCCGGTTACCCTTTTAGTAG	TRCN0000466488	TPM3	217	335	165	196	245	246	131	178	130	88	117	155	162	86	274	170
ATCGATTAACGGACTCTAGCACCC	TRCN0000466489	TMEM213	3395	2743	2428	2331	2741	2874	3014	2415	2443	2419	2775	2118	2226	2000	2152	2179
CTCGGAACTCAATCTCAAAGCTCA	TRCN0000466491	FGF9	1901	1967	2736	3346	1346	1447	1030	1509	1326	1308	1109	1317	1750	1481	1154	1010
ACCCGATTGCCGCGCTTACCGGAA	TRCN0000466492	WWC2-AS2	1343	1322	2133	1886	834	1042	882	932	666	914	888	934	633	512	807	846
AGGATTCGATTCTACTGTTAGTTG	TRCN0000466493	UBXN4	58	41	19	54	29	17	3	64	22	20	82	35	5	29	63	91
ATCCCGCCTCGGCCAGTAGTTGTC	TRCN0000466494	HP1BP3	114	66	210	42	101	72	110	49	72	55	27	40	42	49	67	91
TAGCATGCCGCTCCATGATTCCGC	TRCN0000466495	FNBP4	168	205	74	87	143	113	134	180	100	296	55	133	197	153	157	120
TATCAAAGGCAAACAAACCAATGG	TRCN0000466496	MMADHC	2033	1827	1253	1326	1269	1385	1204	1467	1394	1711	1000	1482	1384	1461	1318	1273
GGTTATACTAAGCCATAAATGTTA	TRCN0000466497	TRMT61A	5099	4922	4569	4522	3811	3325	4124	3626	3797	3636	3149	3804	3334	3742	4132	3779
CCGACGGTGTTTCAAGTGTTGATG	TRCN0000466498	COL20A1	2212	2189	2288	2213	1421	1600	1607	1415	1362	1289	1227	1604	1401	1108	1357	1424
GCTTTGTGTAGGTATACCCTTCGC	TRCN0000466500	LOC102725009	4233	3619	3332	3689	3051	3136	3683	3260	3062	3288	3154	2942	2512	2917	2880	3059
AATCAAACTGTCTCGATTCCGTCT	TRCN0000466502	GGA1	196	159	111	75	135	182	182	154	134	106	149	204	72	95	107	185
AGGAGAACGCCACAGTTCAACTCT	TRCN0000466503	EDNRA	2085	2073	2351	2404	1680	1363	1275	1481	1493	1396	1306	1135	1093	1445	1221	1299
TTTTGACTTAAGCCGATTCGACTT	TRCN0000466504	ZNF24	775	632	478	469	691	786	879	561	658	683	484	609	495	586	360	513
TTATACGCAAACTTCTCCTGACGA	TRCN0000466505	AP3S2	2617	2160	2133	2005	2071	1690	1755	1757	1660	1715	1777	1836	1356	1692	1740	1672
GAGGCACAGCACATCGAATGCCCA	TRCN0000466506	HBG2	2541	2465	3317	2339	2248	1936	1913	1909	1638	1767	2056	1727	1873	1355	1505	1542
TTTCTGGTAGCCAAGGGACACTAG	TRCN0000466507	C20orf24	1038	856	685	708	1102	795	861	789	710	774	729	825	556	743	802	792
GCCCCCGCGTTCTCTAATCGAAAG	TRCN0000466508	EQTN	988	882	1178	1026	678	576	604	628	701	528	546	593	574	525	611	585
CAATCCCTTATATCTCACTTAATC	TRCN0000466509	XAGE2	2684	2407	2252	2017	1817	1927	1851	2128	1579	1710	1718	2221	1746	1511	2091	1806
AACAGGGACGATGTAACGGTATTA	TRCN0000466510	SLC40A1	522	532	357	351	350	441	290	510	351	560	257	320	238	432	364	368
TCGTCGATAGTCGTCTAGTCGCCC	TRCN0000466511	BCAT2	983	979	851	897	772	750	814	959	767	640	632	919	526	628	582	607
GCGCAATGGTGTAATTGGTGGTTC	TRCN0000466512	FAM189B	4157	4080	4653	4413	2956	2885	3149	3398	3080	2792	2853	2760	2615	3106	2966	2793
ATACCTGTGGGGGCCGCTACCCTT	TRCN0000466514	LAMTOR4	1828	1623	1824	1374	1219	1435	1635	1462	1447	1501	1006	1191	1122	1208	1371	1490
TTAGCCGATTTTAAACGTCAGTGT	TRCN0000466515	MTFP1	3694	3378	3183	3332	2655	3065	2600	2811	2686	3026	2381	2000	2250	2524	2526	2560
ACCAAGCATCGGTGTTATTCTTCA	TRCN0000466516	PRSS30P	3383	3457	3019	3269	2535	2010	2389	2423	2281	2509	1997	2567	1924	2157	2411	2403
GGGAATAGCATCGGTAATCCCTTC	TRCN0000466517	CCNC	346	322	240	293	289	284	283	198	375	167	183	129	278	210	112	294
AAGGCACCCCCTATCAGGACCTCT	TRCN0000466518	SHOC2	549	428	390	317	535	474	462	498	389	367	390	280	348	345	360	403
GAATACAAAACGATTCCCATACCA	TRCN0000466519	BIN2	1486	1263	723	715	1232	1111	827	1107	1366	933	1014	1432	982	1282	1097	1066
ATACGCACAAGGAAGCCATGCTGT	TRCN0000466520	Ttll7	967	963	448	618	647	919	831	710	690	805	632	754	672	780	532	849
GCGACGACTCTAACATCAAACGAC	TRCN0000466521	ZNF428	1587	1628	1235	1185	1013	977	998	958	1255	1023	1010	1275	833	1015	1020	1075
TAGTGTTCCCTCCATCTATCGAAG	TRCN0000466522	TMPRSS12	1528	1449	1183	1277	1125	1307	1181	1217	1208	994	1080	955	988	908	979	845
ATTTCTTGGATTTTTATCGGCCAC	TRCN0000466523	NUMB	175	123	74	76	177	175	152	127	146	118	127	78	95	114	154	103
ACCTGACCATGTGGGCGGTTTGAG	TRCN0000466525	ATP6V1C2	1453	1414	1360	1166	1266	1070	1230	974	1149	961	1097	1378	805	1051	1110	1284
TATTTTCCCCCACATTCGAGTGTT	TRCN0000466526	KLK7	1329	1327	937	1027	1137	1076	1094	1004	1303	735	921	1114	897	939	1035	1063
TCGTTAATGTCTATTGATGGGTTT	TRCN0000466527	DAO	1109	966	1101	741	939	855	896	809	982	738	697	715	723	590	797	387
GCCGGTGACTGCATGTATGCTATT	TRCN0000466528	POMGNT2	3003	3030	2415	2275	1916	2277	2026	2163	2293	1826	1648	2073	1554	1859	2229	1773
GAAATCCCATATGTACCTTCATTC	TRCN0000466529	SURF1	1776	1615	1305	1354	1369	1458	1443	1296	884	1246	1149	1271	1318	1105	1312	1475
CTAGACATACATGATGCGGCACCT	TRCN0000466530	ADORA2B	2404	2342	2807	2667	1891	1795	1447	1890	1954	1902	1694	1629	1490	1863	1647	1555
GTCACTGTGTGTTCAAAAGAATTA	TRCN0000466532	VRK2	544	504	505	381	429	399	554	479	573	337	355	530	357	439	343	422
GCGCATGGCTTCGAAATGATGGTG	TRCN0000466533	NUP35	734	705	646	474	621	468	731	489	431	572	391	666	633	525	459	637
ATAACTATCCTCTAGGATGTACCC	TRCN0000466535	IQCH	154	84	18	40	113	121	103	94	65	53	30	46	126	116	58	96
CGATTGTCATTCGGCCGACTATTC	TRCN0000466536	HIST2H2AA3	4090	3607	4770	3689	2590	2339	2562	2572	2526	2065	2171	3269	2071	2309	2008	1860
CCTTGTCTCTTTAGTTCCGGAATC	TRCN0000466537	HLA-B	2586	2437	2082	2151	2021	2116	2014	1872	1673	1730	2013	2338	1665	1574	2082	2275
TAAATTATATAGCATATGCCCATT	TRCN0000466538	PSME1	3413	2596	1984	1861	2644	2314	2771	2698	2636	2244	2113	2787	2116	1876	2569	2198
CATGGTTCGGTAATGAAAGTTCCA	TRCN0000466539	PCDHGC3	3402	3384	3154	3343	2298	2500	2445	1997	2068	2467	2643	1837	1852	2369	2252	1887
GCCACGATGATCTTTTGGCCACAT	TRCN0000466540	TUBD1	23	34	6	47	34	0	44	45	22	11	90	0	41	28	0	0
ACCCTTTCAGGCTTCGACCGAGTT	TRCN0000466541	TGFBRAP1	16	13	6	2	9	11	4	25	13	4	9	7	3	5	9	17
GAGATCCCGATCTCGGATACACAG	TRCN0000466542	GCKR	2187	1886	1283	1333	1685	1745	1628	1787	1676	1407	1514	1614	1184	1575	1563	1752
TTCTGTAACGCGAACGGGTCCGGC	TRCN0000466543	CCT7	2091	1680	1302	1215	1598	1496	1686	1208	1652	1820	1346	1346	1504	1139	1235	1332
GCTTTGTCCAGGTGACGATCGGTT	TRCN0000466544	IGF2BP3	27	20	15	15	22	12	5	2	44	3	32	52	16	41	33	12
AATTCATCGCCTCCCAAGTTGATG	TRCN0000466545	ATP1A3	124	67	39	24	81	66	62	58	95	35	101	68	78	72	86	31
GGGGGATCTACGATATGACAGGCG	TRCN0000466546	SLC25A22	2216	2115	1896	1779	1554	1433	1455	1572	1541	1594	1957	1963	1503	1546	1634	1515
TGGCACAGAGCTTCTTTAACATAT	TRCN0000466547	TMEM263	1523	1890	1348	1827	1143	1188	973	944	1017	1272	995	1197	941	1304	1008	1166
GCGTAAATTTGTGCATGGCCCGAT	TRCN0000466548	NO_MATCH_181	4238	3844	3972	4173	3247	3076	3191	2794	3023	3221	2827	3183	3037	3119	3043	2735
CGAATCCACAATAGTACATGTCTA	TRCN0000466549	LINC00260	3994	4231	5138	4855	2639	2725	2714	2726	2646	2437	2133	2252	2151	2562	2459	2392
TCCGAAGTCGGTAGATTGACGGCG	TRCN0000466550	PDIA4	1577	1441	900	1097	1015	1306	1464	986	1375	695	1176	988	695	918	1045	879
ATCAAAGATACCAGTGTTATTCCC	TRCN0000466551	GSDMC	662	542	483	437	530	509	418	520	491	405	373	407	490	459	415	566
GCGTTAACGGCCATAGATCGCATC	TRCN0000466552	CLK2	243	182	87	75	239	190	71	136	107	205	52	113	194	165	94	120
ATTACCCCGGTATACATAGAGACC	TRCN0000466553	CKB	290	279	204	164	363	272	274	279	246	188	186	186	263	201	287	247
GCTTTTTGTCTTCCCTACTCACGT	TRCN0000466554	HIST1H2BD	1198	945	1064	1043	917	808	904	962	1023	1014	913	1091	795	1268	1020	1187
GCCTTGCACGCTAATAGATGGTAT	TRCN0000466555	ANKDD1A	716	645	492	472	438	496	563	624	722	421	760	319	393	647	553	571
GAATAGCACAAAAGCATATTCCAT	TRCN0000466556	SYT2	716	608	393	405	601	520	475	615	479	577	497	485	709	590	427	622
GCGAAACTAATGCCATTTAAGAGA	TRCN0000466557	OXNAD1	2325	2280	1736	1968	2097	1663	1664	1877	1760	1954	1502	1452	2056	2076	1946	1730
AATTATTACTCTATTTATGGACTT	TRCN0000466558	SNRNP40	1081	695	462	393	999	1128	1045	726	1040	864	923	686	840	714	824	840
CCCCAAAAACTATTTTTTATTCCA	TRCN0000466559	TMEM86A	3396	3435	4539	3266	2202	2834	2384	2258	2154	2580	2444	2382	2339	1914	1754	1984
AATTGTCACGAACTTAATCGTTTC	TRCN0000466560	LATS1	1228	946	596	826	1098	1014	1206	1046	1039	1156	928	821	901	823	945	1047
AGGAGTTACCTCAATTTCCTCCTG	TRCN0000466561	NINJ1	1797	1569	1273	1332	1191	1217	1467	1290	1098	1057	701	1350	940	1140	1298	1286
CGTCACCCAGTGACCATTACTCCA	TRCN0000466562	CPEB1	721	694	405	299	476	505	530	485	520	459	656	860	664	634	619	590
AAAAGCTAGAACCGACAGCAAAGT	TRCN0000466564	BFSP1	322	220	152	88	253	263	314	278	329	196	201	132	169	153	113	476
GTAGGGGTTCACCGAAATCTACAC	TRCN0000466565	NR2C1	685	702	452	462	460	604	545	563	499	506	460	507	488	540	389	493
GTCTGCCCCAGAATGCTCCGCGGG	TRCN0000466566	MUM1	2529	2171	2334	2245	2044	2084	1735	1975	1789	2009	1564	1996	1506	1619	1772	1882
AGTCAGCCGGAACTGAGACTAAGT	TRCN0000466567	NOP58	1296	1235	878	994	1040	970	1041	805	1072	966	902	836	1165	877	755	783
ACCCCCCTGACCTATCATCCTATG	TRCN0000466568	C10orf88	738	701	508	585	512	520	495	593	429	641	613	322	383	372	461	723
CGCCATGGTTCTGCCTACCCTTTA	TRCN0000466569	NRBF2	2238	2208	2310	2113	1485	1711	1587	1438	1356	1321	1685	1328	1498	1486	1964	1341
ACATGCAACAGAATATGGGCAGTC	TRCN0000466571	MOAP1	541	483	340	291	423	336	389	347	360	531	290	496	405	395	394	306
TTTACATGGTTTTCAGCCCCTTGA	TRCN0000466572	GMFB	1982	1475	1243	1251	1747	1386	1722	1636	1622	1489	1415	1391	1272	1353	1244	1504
TTGTGTATGCCTCTTGCCACGACC	TRCN0000466573	GAGE7	2119	1844	2074	1481	1652	1373	1740	1430	1409	1437	1357	1424	1121	1211	1387	1714
GGAGAAAAACCTACATAAAGAACT	TRCN0000466574	FASTKD3	3614	3770	2724	3343	2578	2559	2668	2707	2691	2278	2345	2513	2147	2781	2694	2086
AAACTAGCCTCATCAAAATCACTA	TRCN0000466575	KCND2	848	671	382	394	534	809	760	714	683	746	596	587	489	879	526	435
ATCCCCCCGAGGACTACGCACATA	TRCN0000466576	SULT1A3	1514	1246	1030	1133	1173	1421	966	1052	1026	1219	932	1099	1055	1090	1109	1024
AGCTTAAAACTCATCCGCATCTTC	TRCN0000466577	MAGEB4	1997	1829	970	957	1249	1241	1218	1028	1502	1220	1122	1359	1036	982	924	890
AATGAACGGGACAAGGCGTGGCGT	TRCN0000466578	F11R	1947	1390	1205	1101	1535	1722	1466	1436	1197	1312	1108	1115	1433	1307	1268	1196
ACTGATTAAGACGAGGACTCCACT	TRCN0000466579	ROPN1L	4590	4126	4039	3458	3462	3731	3443	3888	2950	3231	3389	2969	2997	3080	3600	3151
GGTACAGTAATTATGTAACTCTCC	TRCN0000466580	PSD2	14	8	2	0	27	0	1	0	0	0	0	7	0	0	19	0
AGGTATATGTAACCTTGCGGCCAA	TRCN0000466581	CHRM3	27	27	18	8	30	32	6	28	0	23	33	9	17	11	34	55
TTGCTGGAGAGACTACCACGTTGG	TRCN0000466582	RBBP7	113	70	40	67	107	80	153	98	83	38	39	81	77	2	67	88
TAGAGGAAAGAATACAGGATCTAC	TRCN0000466583	NO_MATCH_230	6232	6248	6055	6358	4434	4648	4180	4326	4316	3921	3887	4273	3619	3912	3820	4094
TGGGTAAAAGCGGACTAATTTCGA	TRCN0000466584	TEKT5	2093	2154	1849	1371	1411	1702	1683	1345	1133	1634	1286	1340	1197	1474	1394	1149
GGTACGCTGCGTCTCAACCTTACA	TRCN0000466585	PNLIPRP2	579	576	443	448	434	478	400	381	347	386	331	443	365	602	365	385
ATCTTAGTCCGCTCACGATCATAT	TRCN0000466586	C8orf59	412	330	310	240	443	343	400	310	314	324	414	259	265	423	298	332
AAGCTAGGACAAGGATACTCGCAC	TRCN0000466587	HPS1	882	687	536	520	532	574	694	647	728	657	473	602	502	579	523	606
CAATCAATAACCTCAGTACCACGA	TRCN0000466588	AKR1C1	3114	2845	2321	2348	2032	2442	2201	2262	1516	2349	2585	2473	1905	2097	2042	2136
GATTTGCACCTTAGACAGGGGGTC	TRCN0000466589	TOLLIP	1101	804	932	895	815	814	833	922	775	852	752	775	733	734	698	639
GCTGGACCTCCCTAGCACTTCTCG	TRCN0000466590	TMEM252	2531	2400	2573	2136	1916	2132	2444	1965	1915	1713	2052	1626	1852	1499	1974	1574
TCCTAAACTATCGTAGAAATCCGC	TRCN0000466591	C15orf40	2601	2368	2211	2118	2250	1980	1859	2142	1730	1845	1291	1839	1893	1954	2014	1635
CAAACTTCTTTTCATCCTAAACCC	TRCN0000466592	GHRL	3133	3536	3178	2937	2703	2405	2973	2512	2473	2393	2390	2866	1884	2351	2503	2266
CAATGATTTCAGCATGCTAGCCTA	TRCN0000466593	GNGT2	2496	2521	2388	2632	1922	1434	1807	1899	1743	1883	1558	1390	1741	2075	1900	1577
ATTCCAGTTGGGATTATAACAGCG	TRCN0000466594	RBM26	2018	1588	1430	1397	1873	1497	1694	1513	1605	1408	1477	1791	1189	1302	1391	1322
TGCCGTTTTCTGAGATCCTTGACC	TRCN0000466595	NMUR2	3559	3830	2930	3323	2403	2673	2523	2667	2224	2700	1796	2661	2614	2747	2341	2750
GGCAAACCACCGGTAATATGTCGA	TRCN0000466597	RAP2C	3936	3772	4086	4043	2983	2539	2697	2881	2916	2775	2321	2396	2342	2506	2682	2476
CTGGGAGCCTCGTGGGTCATTAAC	TRCN0000466598	MYO10	4395	4398	4982	4941	3537	3024	3062	3474	3053	3074	2824	3326	2703	2683	2889	3125
TATTGTCTCCGAAAGTGACATGGT	TRCN0000466599	SMG6	1014	744	530	527	653	644	713	553	708	764	620	602	386	574	634	638
GACAATGAGAGATCCGTACAATTC	TRCN0000466600	CROT	1970	1750	1825	2029	1438	1657	1629	1608	1504	1662	1307	1118	1187	1779	1401	1378
AGTCAGCGCTCAGCAAAGTGTCGT	TRCN0000466601	DEFB127	1674	1516	1657	1205	1349	1283	1086	1152	1191	1192	1103	959	1040	1323	1071	1227
GCGTATTCCGAGCACAAACTATTC	TRCN0000466602	PVR	366	351	271	354	279	204	175	176	148	245	392	183	163	235	264	257
ATCACCACTCATATCAAGTCGACA	TRCN0000466603	PIP5K1A	752	667	464	490	534	560	763	627	626	453	561	462	342	607	488	596
GGGCATGATAGTAGCACCACATAC	TRCN0000466605	C10orf32	2442	2435	2105	2030	1931	1910	1648	1674	1655	1532	1600	1815	1703	1403	1834	1717
CGCTGGTTTCTTAACATCATCGAA	TRCN0000466606	RABL6	419	465	282	272	195	140	160	243	156	256	207	342	139	182	237	263
ACTCGATAAAACTAGGGCTATTAC	TRCN0000466607	APOBEC3D	632	603	340	494	469	444	554	492	429	425	290	386	470	394	455	537
CTCTTTCCGAGGCTCCTTATCCTC	TRCN0000466608	LINC00636	1280	1299	1168	1258	1014	1379	952	1020	1076	1196	957	903	952	1210	1068	766
TGATCGTGGCTGTCACCCCATGTC	TRCN0000466609	BTNL3	3208	2922	2502	2487	2090	2299	2317	2039	2113	1711	1853	1791	1587	1920	1578	1787
GGATCTTAATCTCCTCTTCAGGCG	TRCN0000466610	LRCH1	768	653	391	665	566	548	485	440	479	321	559	393	509	422	562	381
TATACTACTCCTGTTGCGCACCTC	TRCN0000466611	ACOT8	1842	1771	1283	1563	1438	1267	1218	1335	1292	1269	1117	1692	1205	1168	1351	1403
ACACAGAAAAGCGGGGGTCCCGCA	TRCN0000466612	LINC01587	3943	3795	5118	4655	3211	3117	2710	3004	2673	2201	2554	3172	2680	2703	2690	2263
GTCAACACCCCTGCACCTACCTTT	TRCN0000466613	TMEM170A	1634	1482	1185	1401	1269	1221	1246	1256	1132	1346	1273	1273	1195	1245	1261	1138
AAAGTCTCTCTGTCTGGGCCCTCG	TRCN0000466614	NTRK3	610	505	292	206	551	495	430	443	438	380	412	496	362	349	423	353
AATTGTCATTACAGGACCGTTAGT	TRCN0000466615	MGST1	2403	1764	1448	1375	2024	2092	1946	1569	1922	1888	2376	1870	1501	1806	1749	2162
CAATTAACCTACAAACTTTTCTTA	TRCN0000466616	IRF3	2146	2041	1880	1602	1113	1537	1526	1562	1328	1269	959	1264	1278	1262	1302	1787
CAGTACACGTGATCCGGGACCTAG	TRCN0000466617	NAA38	2631	2526	2941	3338	1956	1667	2164	1675	1959	1492	1429	1631	1392	1657	1941	1673
TCCGACAGCAGTACCCGAACTGTA	TRCN0000466618	UBA7	334	258	105	174	157	139	205	213	247	193	116	205	164	193	248	69
CCACCAGCACCGCCTCTTCCGATG	TRCN0000466619	EIF3F	2827	2768	2800	3533	1838	2256	1727	1918	1912	1724	1543	1975	1366	1478	1531	1762
AGTATCGATACGGTGATAAGACTG	TRCN0000466620	ROM1	1690	1613	1012	1275	1505	1573	1414	1347	1395	1189	1087	1137	1013	1173	1119	1252
CCCGCAGAGACAACAGGGACAGAA	TRCN0000466621	FUK	226	238	364	170	109	107	75	103	57	47	47	80	89	87	103	184
TACTTTATCCTGCGATGTTGCCGT	TRCN0000466622	IL17F	1492	1530	1259	1368	1175	1031	1112	1212	1143	982	1201	1348	1066	1098	812	1157
CATCAAGGCAAAGACTTCACACAC	TRCN0000466623	KLK15	5944	6144	6278	6786	4132	4132	4253	4382	4666	4567	4271	3677	3314	3640	4215	3993
TTGAGTTTAACAAAGCCTCTCTTT	TRCN0000466624	SMARCAL1	328	229	146	117	260	202	292	258	209	379	182	130	138	255	219	289
ACGAGCATACTATGGCCATGTAGA	TRCN0000466625	ADIPOR2	2304	2213	1952	1909	1814	1643	1596	1380	1878	1789	1587	1166	1321	1611	1341	1549
GAGAGAACCATGAACGTTGCGATT	TRCN0000466626	CHD2	1569	1281	836	760	935	1163	1279	1104	993	1066	886	1181	671	1012	711	949
TTCCTTTGCGAACCGGATGCCTGA	TRCN0000466627	LOC642131	1210	1008	666	686	858	749	1045	835	972	892	752	510	764	654	654	745
GCGAGAGTAGTTGCACTCGTTTCA	TRCN0000466628	PFN2	5328	5123	5727	4961	4288	3496	4277	3775	4230	3962	3070	3684	3606	4220	3607	3722
CTCTCGTGCCAGATATTTGGACCA	TRCN0000466629	KIAA1279	3119	2790	2063	2273	2047	1853	2422	1537	2041	1779	2303	1815	1545	1808	1651	1489
CCTTGAGCCACAAACATTCCCACA	TRCN0000466630	CHAC2	161	174	164	141	172	246	78	194	189	204	81	70	159	131	104	256
CGGACCGACACGAGCACACATAAT	TRCN0000466631	SALL4	932	716	614	389	615	377	536	680	630	493	376	313	301	375	411	297
GGTACAGGGGAGCGGACCCTTTTA	TRCN0000466633	CTNND1	1594	1520	919	1046	1086	974	1548	1104	960	1014	2296	1027	718	1542	1252	1040
TTTAGGCCAATCCAAGCGCCTCCC	TRCN0000466634	A1CF	222	193	171	203	120	289	60	250	121	96	155	243	99	178	152	122
CCCTTGCTTTACTATATTCTCCAA	TRCN0000466635	CDKN2C	236	208	266	210	182	163	122	132	134	176	143	72	194	134	279	141
CACTCCCATCTATTAATGTGTGGT	TRCN0000466636	C3AR1	72	87	41	139	12	81	41	45	86	0	52	24	14	38	86	17
TTCTCTAACACGTACCTTCCAATA	TRCN0000466637	STPG2	77	55	24	11	53	49	36	83	56	51	46	73	81	34	62	50
CCGTTGTCGCAGGTAGGATGGTGT	TRCN0000466638	GBP1	141	95	52	98	44	76	58	74	38	70	53	43	110	61	59	71
ATGACTTGCGCGCAGGGGCCATTC	TRCN0000466639	STMN2	918	791	736	580	643	825	683	638	619	577	753	582	458	668	727	625
CTATATCTGCGACTTATCGGCCCC	TRCN0000466640	PHB	1944	1686	1700	1690	1564	1353	1200	1047	1612	1449	1096	1211	1190	1087	1234	1249
GCCAGCCTCTTTTAGACACTGATC	TRCN0000466641	TEX12	3051	2757	2794	2479	2507	2329	2359	2125	2345	2132	2178	2430	1881	1786	2349	1969
TAAAACCTATGCACGCATGGCATA	TRCN0000466642	FAM107A	313	241	193	301	165	240	250	159	242	160	240	130	242	211	113	184
TTGCTAAATGCGACCGGAAGGATG	TRCN0000466643	OS9	1851	1786	1212	1092	1284	1251	1675	1306	1173	1221	1492	1372	1065	1187	1166	1115
ACGGATCAATCGAGATTTTAAATA	TRCN0000466644	AP1M2	1739	1544	1221	1066	1520	1360	1292	1010	1518	1011	1138	1088	886	1074	1031	1504
GAACCCACTTTGATGTCGATGGCT	TRCN0000466645	PVALB	1257	1159	903	1084	820	866	889	1225	985	1071	752	1100	956	1125	875	1176
CTGTTCTCAGCTTGAACAGATATT	TRCN0000466646	ZNF513	324	318	170	116	149	133	212	247	216	217	138	224	171	144	196	328
CACGAACCCGCCGATTCTACGGTC	TRCN0000466647	RPS26	2491	2495	2817	2597	1720	1541	1638	1497	1508	1560	1660	1139	1440	1524	1546	1253
CCGGAACCCAATGCAAATTGACCG	TRCN0000466648	C16orf54	2883	2908	3463	2864	2205	2201	1980	2223	2152	2264	1808	1751	2092	1658	1954	1806
AACTCACAACGTTCTGCATCCTTT	TRCN0000466649	KRTAP19-7	772	611	437	486	655	561	464	534	559	615	485	561	589	526	343	660
AATCCCTTTGGTATAAACTTCACA	TRCN0000466650	RAB32	1538	948	810	754	1060	872	1066	1108	992	901	976	978	742	1033	1168	918
GTAGTATTTCTTAAATAGCTGGAA	TRCN0000466651	SLC12A1	770	680	392	524	590	624	797	513	458	481	534	579	466	410	509	664
AGTTAGTTTTTCAGTAACCATGAG	TRCN0000466652	WDFY1	0	0	0	0	0	0	0	0	0	0	0	0	0	0	0	0
TCTGACGTACATCTACAACACTAC	TRCN0000466653	DTD1	1272	1262	1148	1025	1078	1364	866	1025	862	934	913	1000	907	1031	937	661
AATACCGTAACCTGTCAAATCGAC	TRCN0000466654	GPSM3	2425	1997	1621	1668	1915	2038	2172	1835	1860	2062	1692	1733	1491	1596	1832	1858
CCATGGGAATCCTCTGTAAGTCAG	TRCN0000466655	DAB2	1250	1129	747	815	639	842	972	713	861	419	647	577	464	505	823	1028
ATTAGGTTAACGGACCAACGTTCG	TRCN0000466656	PLOD3	374	318	143	149	306	271	232	393	119	245	307	159	224	258	282	173
TTACACCCTGAGGTTTATGTGTAT	TRCN0000466657	ASH2L	895	856	577	679	627	851	773	752	832	734	771	597	478	602	494	515
GCCTGGATCCAGAGTTGCCCCGTC	TRCN0000466658	ZXDC	1434	1339	1328	1128	1220	1059	1203	1247	1069	718	1169	751	1085	1157	1031	978
TGGGATTTACACAAACAACACGCT	TRCN0000466659	SUMF2	1534	1599	1427	1386	1204	965	1019	1077	1139	842	1116	1273	818	978	1112	928
AGCCGATCACTGAGGCTACCCGAG	TRCN0000466660	RGMA	3277	3194	2414	2432	2069	2223	2392	2145	2172	1927	1671	1651	1577	1768	2106	1917
TCCCGTCCCAAGTCGGATGTCGTA	TRCN0000466662	HDC	0	0	0	0	0	0	0	0	0	0	0	0	0	0	0	0
CAACCATTTTTCAGGATTCTATGG	TRCN0000466663	TMEM126B	3644	3679	3663	3778	2711	2874	2913	2556	2736	2741	2899	2703	2500	2821	2647	2499
ACTATCCCACAGTAGTGTCCTTCG	TRCN0000466664	PHACTR4	907	847	460	457	628	609	755	608	717	562	600	433	474	644	462	664
CTGTCATACTGTACAAAATCCGGC	TRCN0000466665	LRRN4CL	0	0	0	0	0	0	0	0	0	0	0	0	0	0	0	0
GCGCTGAAACGCAAGTTTAACTAA	TRCN0000466666	REN	724	612	556	392	459	380	447	374	393	374	435	529	380	419	392	592
ACAGCTATGCTGGGTCCGATAGTT	TRCN0000466667	HIST1H4H	3179	3057	2525	2720	2250	2290	2232	2313	1951	2492	2195	1976	1978	2269	2423	2523
GTCACGGGACAACCGATCGACTTC	TRCN0000466668	C19orf44	1801	1638	1176	1196	993	1463	1481	1304	794	1218	1070	1119	1171	1180	978	1131
ACCGCCTCACAAACATCCCGGGCA	TRCN0000466669	CRY1	1811	1869	1192	1394	1110	1561	1063	1209	1477	1116	1330	785	1038	1054	1188	1275
TTCGCTGGTGGAAAAGCCATCACG	TRCN0000466670	PREPL	5932	5176	4977	4861	4490	4341	4371	4412	4358	4079	4280	3883	3526	3818	3408	4363
CTTCCACCAGTTATAATCCAACTC	TRCN0000466671	EIF1AY	2571	2498	2163	2580	1981	2082	1986	2048	1833	2436	1799	1796	1889	1777	2024	2067
GAATAATATCTAATAAACATTTAG	TRCN0000466672	CRABP1	2291	1918	1520	1482	1743	1944	1755	1636	1628	2093	1845	1462	1526	1642	1526	1969
CAAGGAACCGACCGTTGGATTCAT	TRCN0000466673	HLA-DQB1	93	95	133	198	61	7	102	59	51	110	60	7	45	81	19	51
GTACCCCAGTCATAGTGCGCCCTT	TRCN0000466675	ARHGAP27	242	174	183	140	139	81	138	114	96	255	74	114	120	358	108	164
ACGATCGTGATATACAATGGCACG	TRCN0000466676	LRRC37B	1175	895	452	612	794	891	869	771	689	615	548	842	817	671	716	409
ACCCAAGAAACTGGTCCAATCAGA	TRCN0000466677	IL10	3814	3665	3468	3797	2592	2872	2903	2923	3040	2348	2358	2161	2335	2717	2317	2181
TAGTCAGCGTCGCATTGCGCGTCT	TRCN0000466678	RFWD3	0	0	0	0	0	0	0	0	0	0	9	0	0	0	0	0
CAACCTTGGTTTGCCCGTACCTGC	TRCN0000466679	N4BP2L1	3331	3358	3702	2805	2379	2269	2330	2454	2124	2359	2118	2342	2127	2291	2094	1775
GAGCACCCCCTAAGGACTCAATGA	TRCN0000466680	TEX37	3008	2889	2579	3185	2206	2691	2427	2361	2186	2307	2298	2122	1849	2118	2301	2009
CAAACCTTTCCCAAGCCTCCAATC	TRCN0000466681	TFAP4	570	608	352	259	406	391	476	497	353	344	380	440	304	433	337	361
GAAAAAGCTTTTAGGCTTTAGGGT	TRCN0000466682	AEN	1783	1313	999	926	1299	1168	1491	1074	1035	1097	1094	965	950	1199	1166	843
TATAGGATCCGCAGTTGCTCCGTT	TRCN0000466683	SERTM1	2565	2605	2685	2482	1729	2225	1878	1676	1623	1650	1712	1716	1735	1667	1919	1665
CGCCATGACTAAAGCATGAGAATC	TRCN0000466684	ZNF593	4491	4981	5203	5725	2744	2770	2929	2971	3055	3091	3178	2804	2990	2908	2982	2344
CACGCCAAAGAAACCTCGAAGCTG	TRCN0000466685	CHCHD7	11145	11499	13548	12251	7797	8008	8040	7496	7696	7688	6959	7080	6468	6817	7170	6966
CACGCCATCGCACTAAAGTCCACA	TRCN0000466686	HNRNPR	1365	1239	817	908	499	943	932	515	716	774	602	478	265	500	595	605
CAACGATCGAGTTGTAACGAAGGG	TRCN0000466687	SWAP70	2005	2219	1461	1659	1501	1242	1532	1201	1368	1458	1799	1287	1370	1054	1233	1160
TGTTTTCTAGACTCATTACGACCA	TRCN0000466688	INHBA	2509	2193	1844	1594	2174	2101	2040	1979	1736	2136	1564	1653	1511	1847	1652	1833
ACACCGGTCTGCTCCCGATCGGGC	TRCN0000466690	TNFAIP2	1577	1362	1197	1322	1073	1069	1044	1288	1069	819	940	1035	789	924	780	1053
TCCAACGCAGCACACTCACTGTGG	TRCN0000466691	GCSH	1157	1161	1132	1045	888	643	779	715	801	707	713	976	694	580	915	652
TATTCTTCGGCCATCACAATACAC	TRCN0000466692	RAD54L2	56	28	17	8	23	13	3	54	23	82	11	0	10	60	14	2
GGACAATCAATGTACAAGGCACCC	TRCN0000466693	GNG2	9653	9659	11849	10989	7533	6837	6296	6252	6577	6923	6045	5319	5637	5428	6434	6047
ATTAATCGAAACTGTCCCCATAGT	TRCN0000466694	BOLA2	1854	1277	974	1136	1411	1384	1454	1435	1318	1349	1398	1236	1017	1278	1361	1287
ATGTTCCAGTCTCAGACTGCATTT	TRCN0000466695	RPL36	1079	896	879	732	831	863	811	805	825	1028	839	687	653	695	782	796
GACCGCACGGCCGAAATTCTACTC	TRCN0000466696	TARBP2	1469	1576	1710	1774	1188	1245	1282	931	1329	1269	1072	1139	1170	1011	1489	885
AGACTCTAACACACCTGTCTTGGC	TRCN0000466697	RPE	2963	2439	2347	2516	2273	2309	2316	2272	2085	1808	1863	2033	1746	2172	2159	1885
TCGAATGTTGACTGGTGAAGTTAT	TRCN0000466698	STAU2	1926	1644	1658	1463	1381	1339	1384	1459	1031	1131	1179	1069	833	1245	1175	1466
CCCGATTCGAGTGACTGTACACAT	TRCN0000466699	NO_MATCH_113	4249	4240	5216	4719	3097	2646	3270	2893	3240	2882	2802	2908	2386	3089	2904	2868
ACACCTAAACCACCATAACCAAAT	TRCN0000466700	KIAA0922	110	126	46	121	106	96	82	84	61	41	99	87	64	35	198	162
ATATATCGCGCGGGTCGGCCCTTG	TRCN0000466701	DNTTIP2	253	196	83	180	134	292	220	55	175	130	70	135	143	194	199	195
TCCCTAACAGCGACTTTGAGTTTG	TRCN0000466702	FAM166A	2656	2466	2022	2262	1678	1822	2222	1906	1759	1573	1790	1748	1787	1314	2019	1511
ACAAATACCTATTAGCCAATGAGA	TRCN0000466703	NADK2	1132	989	1148	829	967	751	781	752	1072	1148	852	668	737	648	820	869
ACGTAGAACTATTACGTTTATCAG	TRCN0000466704	FAN1	504	497	368	312	458	276	448	352	563	681	412	265	286	221	318	257
GCCCTGCAGACGTGCTATTAGCGG	TRCN0000466705	RNF144B	2612	2745	2119	2481	2012	2201	2091	1979	2044	1862	1761	1831	1643	2110	1912	1941
ACCCTTCTGGGCTTCCTGTGATGA	TRCN0000466706	GNL2	792	700	387	363	632	436	654	683	764	672	658	406	605	546	693	550
CGTGTCACTGTCCATGGGCTACTC	TRCN0000466707	SIPA1L2	2029	2032	1578	1781	1117	1285	1072	1365	1571	1053	1091	1262	1605	1213	1175	1405
CCTGCTGGCTCGGGGCGCGTTCTA	TRCN0000466708	TINF2	1486	1426	1091	1238	887	1181	1038	937	1105	975	765	872	737	1080	908	901
TCTCGCAGGACAGTTCGGCCAACT	TRCN0000466709	TUBB4B	587	566	328	404	410	393	434	453	321	326	428	397	383	416	412	350
CTTAATCTACTAATTCACAGAGCC	TRCN0000466710	S1PR5	1463	1250	754	803	1088	1157	1042	993	1079	1225	804	1137	928	1119	898	1205
CAAAGAGGTTTAGCCGCCCGACTA	TRCN0000466711	RSPH9	2069	2262	2147	2357	1497	1406	1294	1341	1436	1551	1193	1471	1495	1298	1343	1445
GCATATGGGCAGTAATGCTACTTC	TRCN0000466712	MLLT6	1822	1822	1670	1342	1591	1769	1401	1400	1191	1533	1206	965	1209	1309	1181	1463
CAGATAGTCCCGAGAGCACTGCGA	TRCN0000466713	SPOCK3	1377	1283	1401	1162	963	920	993	894	924	921	632	973	640	932	947	973
ACTCAACAAGTCCTCTCTCATGTT	TRCN0000466714	SCAMP3	2722	2565	2143	1998	2291	2541	2326	2080	2321	1823	2056	1951	1840	1946	1774	2075
CGACTTCTGTAATATGTGCTCATC	TRCN0000466715	CDK9	1261	1056	700	940	639	435	649	1041	876	437	936	912	674	719	653	832
CTTAACTCTCCCTAGTTGAACAGG	TRCN0000466716	NLK	252	206	264	208	136	92	125	102	198	152	171	190	80	121	117	104
CATAATCGCACCGCATGCTGTAGA	TRCN0000466717	MAGI1	48	72	34	17	30	86	17	12	20	53	7	0	26	59	38	13
TGTCTCCGGACCTAACTAATTTTC	TRCN0000466718	PI4K2B	1326	1090	1156	1064	871	729	783	795	655	744	760	858	548	520	804	735
TCTCCTTTCAGTAACGGCTAAGAC	TRCN0000466719	PIK3CA	107	79	40	95	92	35	52	62	88	48	89	33	38	8	75	33
TAGATCATCAGTTATGACTCGTCA	TRCN0000466720	CENPP	1344	1277	954	1274	1044	1012	1217	1007	797	780	1030	1106	1037	806	864	929
CGACTGACGATCACGCATCGCGTC	TRCN0000466721	POLE	2110	2150	1921	1963	1395	1125	1484	1273	966	1327	1092	995	1612	1439	1218	1175
CAGCCCGCCGCGTTCTTTCCGTTT	TRCN0000466722	TM9SF1	920	828	842	487	623	591	586	535	692	409	445	595	623	413	458	493
ACACGTATCCGACAAAGGCGTAAA	TRCN0000466723	MRPL1	3722	3572	3604	3430	2900	3123	3303	2914	2896	2542	2930	2944	2491	2352	2413	2822
TCCGCGATAAGGTCCGCCCATACC	TRCN0000466725	CD99L2	34	37	105	25	10	58	18	19	11	0	13	2	15	0	1	45
TAACCCTGGTTTCTATGGAAATCC	TRCN0000466726	HOMER3	62	44	146	65	72	9	67	49	58	32	11	1	28	27	0	50
CCGTACTGCTAGGTGTGGAAGCTA	TRCN0000466727	HLA-DPB1	38	53	24	16	47	31	24	13	23	36	44	126	18	18	0	18
GATGGCTTTCTTTAACAGGCGAGC	TRCN0000466728	MED24	18	26	9	16	12	20	6	31	19	20	5	50	0	29	1	0
CATGTTTTCTAACCGCAAGTCTGT	TRCN0000466729	PDCD6IP	36	48	3	49	37	10	64	13	32	62	11	0	16	0	23	13
CTTGCCAACTTTTACACGTTGCGG	TRCN0000466730	C14orf39	1200	1146	826	793	868	964	1138	702	982	544	640	837	653	885	773	827
GGCTCTGGTGCGGACAGCAGAAGC	TRCN0000466732	PIK3R1	963	1006	525	659	719	563	714	560	818	652	759	645	641	606	601	411
ATCGATACCGAATTCTCCGGACTG	TRCN0000466733	CGGBP1	624	529	639	641	475	570	422	478	641	678	344	605	394	435	458	470
CGCCCTGATTCCAAAGGCTGCATG	TRCN0000466734	CACNB1	2698	2706	1961	2070	2054	1670	1919	1461	1546	1211	1330	1369	1188	1327	1302	1026
TACGTGCTATTTCTCAGTGGGGTC	TRCN0000466735	GNPTAB	1622	1506	1510	1581	1186	980	1116	1099	1075	1073	805	1141	992	836	1016	1232
TGGAATTAGCTCCACCGTGTACTT	TRCN0000466736	LZTR1	547	493	463	526	384	408	321	199	254	329	261	421	403	230	384	540
ACATATCCGAGACCTATTTGAATG	TRCN0000466737	RER1	2608	2554	2054	2062	2276	2441	2091	2005	2158	2027	1643	1869	2037	1601	2129	2313
TGGATGTAAACCCACAATCCGGCG	TRCN0000466738	CCDC33	2293	2447	1826	2150	1685	1601	2047	1857	1657	1440	1382	1495	1615	1333	1302	1478
TCTTATCATTTTCCCTAGAATCGC	TRCN0000466739	TACSTD2	800	649	637	549	505	602	629	702	669	560	623	510	494	450	494	458
CTTCTGTCGCCTGGTTCGTCCCGT	TRCN0000466740	SDCBP2	825	697	636	480	494	645	594	423	604	436	547	489	489	551	629	654
GTTTATGGACCATTTTACGGGACA	TRCN0000466741	SPSB2	2112	1766	1579	1415	1729	1707	1810	1688	2042	1277	1642	1638	1461	1895	1776	1910
TCGATAGTAACTATTTTGCCTAAT	TRCN0000466742	CNST	1221	1139	910	1316	876	1090	800	754	782	1031	673	860	683	851	1027	704
TTGCGTGTGATGTTCCCACTTATC	TRCN0000466743	STK32A	995	803	764	926	677	689	611	810	587	643	947	597	640	653	754	852
TAGTTTTATATGGTTCTCCTCGGC	TRCN0000466744	KIAA1143	2119	1879	1531	1743	1755	1834	1739	1542	1731	1435	1577	1889	1553	1698	1727	1554
GTAAGCTGTGGGATGTCCCGAATG	TRCN0000466745	NARF	1390	1186	983	919	1022	806	1177	791	954	981	1085	1015	765	996	1088	1017
GAAAAATTGCTTCGTTGTTCCTCC	TRCN0000466746	RPL3	1593	1450	965	916	1134	1224	1125	1409	1340	1420	1189	1088	1004	1355	1267	1047
GACCTGTCATAAACTCAGTACTTT	TRCN0000466747	FAM133A	1636	1471	1077	746	887	729	690	957	763	995	633	915	693	877	796	904
CGACCCGGGCCCTGACTTCGTGAG	TRCN0000466748	RPLP2	7078	7440	11045	8565	4381	4845	4411	4690	4919	4504	4312	4385	3838	3992	3793	3820
GCTCAAAGCGCTCAACTACCAATA	TRCN0000466751	C11orf24	251	191	188	123	125	259	178	261	312	174	122	90	103	148	254	113
GGCGAGTTACTAATCCTTTCTGGG	TRCN0000466752	HSPBP1	1624	1574	1780	1756	1325	1348	1205	938	1149	1362	1208	1024	874	709	1102	936
TGTACGGGGTCCCTGCGTGTATGT	TRCN0000466753	OSM	3567	3116	4683	3903	1597	1735	1762	1879	1957	2031	1555	1513	1176	1588	2250	1699
AAACTGCTGAAATAACCAGGGAGG	TRCN0000466754	CSH2	1499	1193	938	841	1313	1249	1158	1322	1095	937	1028	966	1103	1016	985	881
TGAGAGTTTTCAACTTTGCGAACA	TRCN0000466755	ATF6	3375	3375	3144	3494	2573	1925	2243	2224	2750	2323	1939	1693	2288	2218	2152	1893
CAAATACATCGGTACACGCTCTTG	TRCN0000466756	PIGP	779	806	717	656	664	597	480	714	377	448	658	526	598	419	649	741
GGTTTTCACAATCCACCCCTAGAG	TRCN0000466757	CALML4	2008	1945	1740	1529	1359	1220	1648	1702	1833	1825	1498	1639	887	1393	1423	1465
ACCGTGAAACGTCGCCTACGCACT	TRCN0000466758	KLHDC3	933	835	668	833	869	805	914	683	605	559	701	697	497	584	598	673
CCGTATCTTTATAGAATCCTCGGA	TRCN0000466759	SPIC	2082	2109	2567	2582	1428	1458	1420	1240	1010	1642	1224	1188	1398	1550	1094	1241
GAGACAGTCGAGCAACCATATACA	TRCN0000466760	ZBED4	250	213	112	123	108	93	193	138	202	151	208	131	168	91	204	230
AGTGCTGCACGATATCGTACACTG	TRCN0000466761	SSX4	2987	2573	2298	2755	2153	2144	2219	2174	2170	2131	1815	1845	1784	1831	1882	1735
AGACTCGCATACCGTCAAATTGAG	TRCN0000466762	CHIT1	1623	1374	1095	1021	1075	1361	1536	1363	1274	1181	795	889	912	966	828	1332
ATTTCAAACAAATATCTTTATCAT	TRCN0000466763	MYLK3	428	226	137	150	215	307	430	291	317	423	291	210	233	257	204	315
TGTCTCCGGCCTGGGCGCCTTTCA	TRCN0000466764	AES	1434	1407	1644	1277	1124	1288	1149	1030	1101	877	977	1122	795	760	1084	923
GCCATCTGCCGTGAGGCCCAGGTG	TRCN0000466765	DERL2	3464	3282	3069	2795	2564	2581	2654	2808	2779	2595	2155	2358	2136	2149	2449	2581
CTGTTCCCAGTGAATGTGTTTTGC	TRCN0000466766	C17orf59	1354	1242	1610	1110	838	917	820	886	977	722	1032	790	848	902	847	772
ATGCCCATTTAACCTGAAATTCGC	TRCN0000466767	CRYBB1	1652	1357	1083	1154	1317	1488	1402	1230	1151	1193	1070	1435	933	1078	1038	1193
GTGTGCCCTGCACCCCACTCTTGC	TRCN0000466768	GAS2L3	353	275	162	194	294	336	320	297	306	257	317	266	242	260	242	177
GCAAAGACAAACACCGCACCCCCC	TRCN0000466769	C14orf159	1810	1828	1613	1315	1312	1379	1323	1467	1504	1136	1281	1418	1227	1128	1218	1090
CACCAGTATCGGGACTCGTTCTGC	TRCN0000466770	ATAT1	3909	4108	3802	4088	2837	2562	2470	3031	2767	2438	2104	2722	2206	2721	2363	2558
AACGTTTTGAGAATACGGCTCAAC	TRCN0000466771	C16orf71	700	611	329	329	605	598	562	558	556	405	353	570	345	512	453	465
TCCTCTCACTTCAGCGTTTAGCAG	TRCN0000466772	FAM193B	932	934	930	706	610	1044	413	599	771	819	642	526	507	546	454	711
TAATACAATTCTATTTAACTTATA	TRCN0000466773	CLEC14A	684	631	366	482	731	501	511	423	556	528	465	504	537	397	610	388
CTTCGATGTAGACACAACAGCAAG	TRCN0000466775	RAB1A	1157	1022	1099	1043	979	711	792	921	881	915	735	673	645	899	760	674
ATTTATATGCAAAAGGCAACAAGC	TRCN0000466776	MCM2	193	130	40	65	175	65	95	188	153	109	136	97	57	90	146	162
GTCTGTCAGTTTCCAATATTTCTT	TRCN0000466777	PRPSAP1	1008	707	657	510	708	721	720	674	616	694	503	652	614	620	962	773
ATTAGCAGGAAGAAATATGTGGTT	TRCN0000466779	PAPSS1	384	317	156	193	260	199	221	175	359	473	386	227	289	231	346	265
TTAATTAGCTTAAAGCACGGCATA	TRCN0000466780	PCDHA10	617	523	290	258	606	620	583	564	314	429	400	727	273	470	492	355
AATTGTGGTGCTTGTTGCCGCCTG	TRCN0000466781	ACTG1	615	391	294	319	370	514	418	562	527	514	400	393	377	399	380	547
ACTGGGTCACAGTAGTGATTACCC	TRCN0000466782	TGIF2	1947	1763	1496	1186	1862	1432	1570	1584	1570	1551	1283	1256	1284	1379	1498	1345
AGCCCGAATAGGCTCTTACCAAGC	TRCN0000466783	NO_MATCH_53	349	332	301	200	215	187	328	196	188	206	227	215	259	169	250	71
AAAACCCAGGTCGTTCCAACTCAG	TRCN0000466784	SFXN1	1043	826	526	630	710	706	793	707	708	760	682	875	739	749	650	803
TAAAGCGGCTTTTGCAGTAACACT	TRCN0000466785	PDLIM2	5769	5426	5952	4867	4187	3788	4024	3574	4150	3951	3222	3937	3590	3619	3420	4430
ACCTTCCGGTACCTGAATCAGCCG	TRCN0000466786	TPD52L3	911	811	700	772	590	741	551	596	660	698	695	602	658	733	494	703
GGATCTAACACGGCCCTCACTGTA	TRCN0000466787	BUB3	98	117	74	71	110	34	69	94	2	81	111	79	74	104	14	86
CTTGAGATGGGCCAGTAACTGTGC	TRCN0000466788	BTBD9	81	79	74	46	36	101	49	39	87	41	44	11	51	15	102	58
ACCGAGCTTCCTGGGTACCTTGGA	TRCN0000466789	KRTAP10-5	7660	6669	5617	6543	5658	5382	5538	5817	5033	5403	4518	5398	4275	5167	4681	4969
TCCCTAGAATGCAATACTATTATC	TRCN0000466790	LSP1P3	5768	5435	5602	6496	4801	4529	4218	4425	4259	4208	3953	4232	4043	3669	3864	3922
GCCCTGTCCCAACGCTGTTGTTAA	TRCN0000466792	CDC20B	2843	2475	2694	2680	2348	2390	2437	2141	1831	2387	2109	2127	1739	1942	1828	2956
ATTACATATTATCTTGTGATCTCA	TRCN0000466793	GPC3	35	35	18	20	48	47	33	35	19	54	50	23	33	35	16	12
ATCAAGGGCCTAAGGTAAACAGCT	TRCN0000466795	BPI	76	49	51	33	65	97	30	60	62	43	88	33	24	88	45	33
CTTACAATAACTAAGCAGCCCCCG	TRCN0000466796	SNX21	2057	1788	1857	1424	1440	1486	1162	1229	976	1352	1209	1204	1035	1489	1392	1326
GGACAAAGAGTTCTATCACCGTCA	TRCN0000466797	SECISBP2	2366	2426	2465	2286	1570	1545	1410	2225	2057	1481	1846	2133	1388	1656	1656	1617
ACTTAGCAATCAGAGCGGCGAACA	TRCN0000466798	PPP1CA	140	150	151	127	119	78	93	91	174	174	44	65	168	81	90	78
CATACAATGTCGAAGTCAAGGAAT	TRCN0000466799	SULT1A1	974	884	825	720	679	797	610	832	558	660	683	774	526	546	575	604
CTACGCCTAACAATAGCTAGTCAG	TRCN0000466800	LIMD2	4537	4428	4878	4890	3455	3799	3513	3704	3201	3344	3100	2938	2952	3113	2515	3301
TGCCTATACCACAGTATAAGGTTT	TRCN0000466801	ERI3	2755	2713	2834	2885	1758	1775	1629	2199	1693	1750	1560	1813	1467	1843	1864	1961
ATGCCCGGGGAGTCGTACGTAAGG	TRCN0000466802	LONRF1	1598	1378	984	853	1209	1170	1500	1076	1419	1291	1018	827	1164	1063	1248	996
GCCATAGCCATTCATCCCGAGCTT	TRCN0000466803	PTPN9	1561	1384	1061	862	974	1289	1264	916	1177	970	800	835	901	1061	1041	771
CTGAGTTACGATAAGTAAGCACAC	TRCN0000466804	ARID5A	2420	2311	1525	1902	1966	1908	1987	1568	1551	1627	1689	1367	1577	1956	1678	1597
CCTCCAACTGCAGAATGATGGACA	TRCN0000466805	HTR2B	165	198	198	304	117	22	64	114	162	177	130	27	115	62	97	142
GTCAGGTCATCGTTGATAAAAAGT	TRCN0000466807	HSD3B7	1853	1819	1313	1377	1577	1596	1652	1757	1657	1264	1537	1156	991	1556	1360	1350
GAGCTTCCAGTCTAGCTTCGTCTG	TRCN0000466808	RAD23A	921	774	500	565	784	636	716	756	788	750	497	706	606	405	756	495
AAGTAACTCTCACATAGCGCTGGC	TRCN0000466809	NO_MATCH_14	20	7	5	0	0	0	0	9	0	0	0	0	0	4	0	10
CTACTAACCATCCGTCAGTTTTTA	TRCN0000466810	TMEM51	1390	1462	767	918	1048	991	1177	940	1033	1022	1160	5423	855	956	712	773
CACCATCTTCCTCTACTAGCAACA	TRCN0000466811	OSTC	1892	1825	1960	1733	1198	1098	1213	1596	1305	1247	1307	1507	1138	1442	1151	1169
CATTGACTTTCGGTTTTATATCCT	TRCN0000466813	MRPS6	684	631	561	510	613	456	706	645	627	586	553	596	503	556	524	524
AATGAAACCGCCTAAAGTGCATTC	TRCN0000466814	ADCK4	313	320	138	172	217	172	201	276	164	290	221	175	215	203	165	213
AAAAACTCCAATTTCGTAGCAACG	TRCN0000466815	CORO2A	529	339	224	264	434	460	454	395	385	250	446	353	404	335	263	372
ACAAGAGACGGGGGGCAGCTTTTC	TRCN0000466816	LOC283693	2683	2451	2577	3034	1831	2189	1952	2170	1929	2175	1825	2008	1497	1738	1969	1890
GAACCGTGTAGAAGCAACGATACA	TRCN0000466818	CCDC102B	1749	1451	1160	1169	1382	1180	1252	1215	1173	1007	1134	1078	1228	1074	1223	895
ATCAGCGCACGACGTAAACACCTG	TRCN0000466819	RAB40A	4520	3724	3638	3664	3226	3766	3614	3339	3147	3491	3441	2724	2686	3024	3092	3305
AAAGAGACCTTCCCCTTGCTCTTT	TRCN0000466820	XLOC_013840	370	271	193	215	231	156	184	326	232	145	309	103	234	273	216	248
CTGATTGGGGCACAATCATCTCGA	TRCN0000466821	NCR3	3449	3311	3707	3534	2530	2614	2522	2633	2480	2449	2292	2303	2264	2278	2443	2213
TTCCGTCATGCTACGGATAAGACT	TRCN0000466822	GSTK1	370	359	270	287	326	278	404	238	302	302	396	305	345	244	366	259
GGCTGACCCGAAGTCGAGTCGCGA	TRCN0000466823	C11orf65	1792	2006	1401	1861	1204	1625	1430	1564	1421	1350	973	1228	1024	1148	1235	900
ACCAGTCTTATCAAACCAGGCAAC	TRCN0000466824	SOSTDC1	5013	4776	4609	4836	3735	3677	3491	4083	4092	3629	3454	3679	3091	3084	3436	3129
TATACTACGTTTCCCACCAGCCAT	TRCN0000466825	KRTAP3-2	2817	2582	2452	2946	2133	2073	2112	2201	2002	1918	1840	1549	1687	1849	1656	2183
TAATTCCGTATGAATACTCCGCCC	TRCN0000466826	HSPA4	1357	1150	1133	854	894	804	776	817	829	803	553	974	723	920	652	907
TCCGGAGTGCATATCCTCCCTTAC	TRCN0000466827	SLC7A11	0	0	0	0	0	0	0	0	0	0	0	0	0	0	0	0
TTAACTTCAATTCTCTTTTTAATT	TRCN0000466828	DIMT1	1693	1483	1195	1080	1372	1327	1698	1311	1218	1362	1046	1388	1498	1387	1243	1698
CCAGAACTCACATCATCCAGCACC	TRCN0000466829	GSTK1	2922	3125	3130	2791	2426	2375	1747	2066	2063	2260	2047	1812	1678	1973	2104	1684
ATCTTTCTATTTACGAGCTTGACT	TRCN0000466830	BAD	1133	838	597	503	865	864	922	664	783	646	762	550	602	612	680	839
ATAGTCTATCCTTAACTCTGTCAC	TRCN0000466832	SELENBP1	956	787	522	555	831	811	953	856	719	766	490	641	730	604	640	740
TTCGGAGGTAGCAAGAGCAATCTT	TRCN0000466834	NO_MATCH_292	0	0	0	0	0	0	0	0	0	0	0	0	0	0	0	0
CTAGATTTCCCTAACCACACGTAT	TRCN0000466835	SLC2A11	713	710	582	561	577	359	562	444	527	294	404	422	338	446	605	449
ACATACCTTCAGTAGCCGCCTCCC	TRCN0000466836	ZNF582	790	672	440	679	438	525	527	546	473	461	423	584	558	358	802	713
ACACGCTTCTGATCATTTATTAAC	TRCN0000466837	DRG1	2022	2009	1530	1459	1459	1762	1701	1708	1369	1499	1269	1317	1234	1333	1808	1404
GTCACAGCACGTCTCTGGGCGGCA	TRCN0000466838	DDX39A	1001	872	841	784	711	721	664	762	802	857	773	787	461	615	507	647
GTTCCCTCCCGCACGTGCTCACCC	TRCN0000466839	MAGT1	1388	1010	950	964	892	1073	867	863	1055	978	952	1196	823	986	1003	884
GGAAAGCAACCCCCCTCCGTTCAG	TRCN0000466840	VASH1	1375	1468	1662	1439	998	1242	892	960	835	1100	720	929	615	801	1112	934
CAAGAAACAGCCCGAAAACCGCGA	TRCN0000466841	ZGRF1	69	89	24	9	141	33	133	14	48	27	28	161	32	26	57	110
CGATCATTTTTGAGTTCTCCTGTT	TRCN0000466842	SCAMP3	3988	4124	4192	4709	2918	3061	2200	3152	3148	2832	2937	2798	2694	2642	2184	2701
TCCGGACCGTTATAGATATACTAG	TRCN0000466843	KIAA2013	9420	9130	8922	9844	6897	6722	6203	6994	6413	6957	6300	5827	5385	6213	6472	6833
TACTAGTTCACGTACCGTGCTGGC	TRCN0000466844	B3GNT2	55	56	53	59	37	23	18	25	49	53	39	2	10	66	168	40
CCAGTGAATCTGAAGAATATATCT	TRCN0000466845	MMD	100	136	48	71	86	193	48	143	60	117	90	271	131	76	104	168
TGTGACATTCTCACTGCCAGTGTG	TRCN0000466848	TMEM116	1474	1496	1648	1668	941	1036	1117	1142	1107	1032	833	1001	894	760	868	1031
CTCATATTAGCACCATTCCCCTCA	TRCN0000466849	XLOC_l2_000791	102	103	98	111	30	70	1	39	60	20	80	94	54	35	101	74
AGGCGCTCCGGATATCTATCGGCC	TRCN0000466850	CYP2B6	192	145	156	83	88	101	131	231	119	159	69	62	138	127	141	103
TTAAGGTTCCGCCAGCTCATAACT	TRCN0000466851	PRSS35	26	20	33	0	3	7	10	0	0	33	9	0	8	0	20	19
GACTCGAGTATAAGTGCGATACTT	TRCN0000466852	DDIT3	1443	1396	779	1397	1093	1261	1472	1422	968	1058	895	964	1046	962	1265	1344
CGACCTGGTTGGGCCCGGAAATCA	TRCN0000466853	CD5L	2416	2676	2621	2675	1751	1971	1493	1873	1865	1479	1433	1494	1593	1598	1700	1877
CGCAGCTATACAGAGGGGCACGCA	TRCN0000466854	IFNAR2	1082	1092	979	1017	815	586	673	547	486	1034	510	496	363	729	718	555
CTTGTCATGTTTTTTATAGTTATT	TRCN0000466855	FBXL12	1856	1867	1159	981	1272	1301	1254	1135	1121	1159	1055	1319	1249	1206	1160	981
GGCCTTTACCAAAGGGCGGACCTG	TRCN0000466856	SMCP	3062	2694	2751	2816	2121	1946	1880	2152	2035	2174	1873	2032	1798	1826	1871	1958
TTCTTCCTATCTGGGATAGATGGC	TRCN0000466857	REC8	709	646	455	325	604	419	576	604	649	469	606	448	425	465	555	579
TACTGGATCAGTCGGGGGAAGCAG	TRCN0000466858	CRAT	1232	1281	1031	1089	916	929	688	801	822	859	788	940	621	872	889	1115
CATAGGCAAACCCTTACACCAATT	TRCN0000466859	OLFML3	2077	2008	2042	1843	1514	1396	1077	1438	1171	1530	1248	1262	1353	1086	1244	1226
TGCTCCCACTCCAGGGCGCGGTAA	TRCN0000466860	NPHP1	545	539	454	424	428	334	261	400	208	246	344	316	382	289	359	325
ACTGTCTCGCGGTTATAGCTTGTA	TRCN0000466861	CST8	299	279	220	210	192	210	191	318	213	165	255	163	130	215	133	286
CGATGCCATTGATCGAGGCGGGGC	TRCN0000466862	CXCL11	883	1093	966	1110	604	486	573	729	335	771	464	610	495	710	595	557
AATTTTGGCGTTCCAACTTCGCGC	TRCN0000466863	SEC61G	559	330	307	217	442	477	485	419	445	419	383	365	318	288	292	339
TCACAGTTGCTGCGACATACGAAC	TRCN0000466864	HDAC1	1100	1039	717	955	881	900	669	790	606	483	1093	589	655	680	569	470
CTAACAAACCCCGGCATAGGGAAA	TRCN0000466865	OSBPL2	1321	1287	1110	1021	1108	965	1078	846	1038	977	892	842	900	844	1061	974
ATTGGAGATTTTCTATGCCGTGAA	TRCN0000466866	KIAA1683	645	506	384	270	510	518	668	516	516	510	367	386	457	338	450	568
CTGGTAGACCGGTTTAAGCTAACG	TRCN0000466867	RIC8A	438	436	366	400	283	225	231	323	200	476	270	167	228	317	301	272
TCACATTCTACTCATCCACCATGC	TRCN0000466868	RAB25	2704	2688	2540	2869	1918	1915	1869	2130	2322	1961	1875	1690	1730	1956	1827	1493
ACTACACCTGTTTCGGATTTAGGA	TRCN0000466869	BRICD5	1312	1285	1121	1160	1073	1078	922	1092	1223	1267	968	897	666	744	951	1006
TTCTAAGGTTTTCCACCGATTGAC	TRCN0000466870	MAP3K9	16	7	3	4	0	13	0	0	0	6	0	19	4	0	1	4
ACAGCGAGTAGACGACGTGCACTT	TRCN0000466871	LOC100126582	3410	3322	3209	3320	2558	2540	2394	2237	2436	2166	1765	1845	2176	2298	1927	2534
AGCCCGCAATCGGTGTAATCCGAA	TRCN0000466872	ZBTB14	759	640	214	206	337	404	387	490	525	471	411	501	363	332	270	388
GAGACGCATTACAAAGCGAACTGG	TRCN0000466874	RPL14	2077	2029	1765	1753	1167	1633	1686	1651	1477	1322	1407	1768	1428	1365	1436	1530
CAGAATCAGGTTTACTGGTATCGG	TRCN0000466875	TMUB2	1644	1670	1528	1548	1313	1378	1400	1194	1267	1440	1071	1392	1000	1375	1227	1217
CCCACCACTCTGTACATCGGTATC	TRCN0000466876	GTF2H2C_2	2073	2020	1886	1812	1510	1728	1410	1395	1329	1365	1323	1356	1524	1385	1268	1613
TCAAATGTGCCTGTTATATCTGGA	TRCN0000466877	FAM189B	1202	1038	937	920	955	661	888	639	773	909	506	597	704	498	750	823
AAAATCGACTATGATTGACAGGTG	TRCN0000466878	LDLRAD4	1183	855	727	664	806	1041	1046	878	888	1100	825	827	891	870	774	861
CTTATAACGTTATGAAACTCGTCA	TRCN0000466879	WARS2	1031	981	751	737	605	792	635	656	656	768	629	643	614	833	762	894
CTTTTGTGTCCATAAGCAAACTTA	TRCN0000466880	TNK2	303	347	232	242	219	276	154	223	431	284	276	143	235	281	164	282
TTCTGCCACACGAGTAAAGTCAGG	TRCN0000466881	F2RL1	1665	1341	1168	1138	1167	1311	1428	1188	1160	1011	1037	1137	1104	1063	1316	1417
TGTTTTCCATCGATGCATCTGTTC	TRCN0000466882	CRACR2A	1042	967	786	675	638	1064	836	759	594	647	888	544	670	887	530	642
ATGCGCACAGCTCCGACGCATCGC	TRCN0000466883	ZNF670	354	299	176	254	279	237	394	262	212	297	168	168	183	198	216	270
TCGGACATATCGGTAGCCCTTAAC	TRCN0000466884	MECP2	1561	1547	1517	1390	743	1173	939	892	868	860	655	806	523	841	666	838
AAAATGTACACACCAACGGATATA	TRCN0000466885	BABAM1	1253	1006	695	704	1062	1256	1254	1325	914	884	916	1208	868	912	1125	1144
AGCTTAAAAACTGCCTTGGATCCA	TRCN0000466886	MAPK15	1032	832	802	739	632	844	790	680	706	618	584	643	614	748	738	717
AGATGTCCCGTTACCGATCACATT	TRCN0000466887	MC3R	1182	1019	926	761	829	783	861	739	779	925	708	966	675	631	623	739
TTCATCCCCTTAATACCGCCCGAC	TRCN0000466888	ZNF404	562	470	326	336	363	424	404	328	450	453	624	220	346	276	496	421
ACTACAACCCTCCGACTTTGTTGC	TRCN0000466889	MRM1	1073	1004	747	778	763	982	900	985	875	907	680	707	710	547	804	718
AGCTAACGCTAGCCCCCCAGCATA	TRCN0000466890	GLB1L3	1856	1429	1204	1157	1325	1394	1244	1281	1167	1500	1173	1089	959	1035	1077	1246
GCTGCCCTGCGGATGCATCATGTC	TRCN0000466891	TP53I11	3045	2697	3570	3271	2481	2112	2544	2204	2207	2383	2057	1846	2291	2344	2074	2018
CATAATACTATGGATAAGCGACCT	TRCN0000466892	HEXDC	2949	2833	2364	2255	2353	2468	2331	2224	2305	2463	1946	2275	1809	2015	2077	2096
TCCCGTTGTTACCCCTGCTCGTAG	TRCN0000466893	PQLC2	5304	5105	5079	5414	3815	3662	3498	3686	3941	3415	3930	3887	3022	2790	3277	3252
CAACACTGTTCCATAAACGAGCAA	TRCN0000466894	CSRNP2	2601	2566	1740	1350	1534	1853	1630	1612	1731	1782	1587	1315	1364	1530	1727	1561
AAGTCCGTTAAAACGGCACTGCAC	TRCN0000466895	YWHAB	94	74	52	68	85	134	74	104	84	43	53	44	80	66	70	56
GGACCGACAGCTTCCTTACACCTG	TRCN0000466896	GLUD2	282	337	331	357	247	155	380	165	291	447	223	228	97	90	186	200
ATCATATGTGCTTACTCGCCCGGG	TRCN0000466897	ZACN	209	155	68	118	97	148	150	146	136	118	65	115	102	80	154	186
AGGGAGGCTACCTCACCCTAGGGC	TRCN0000466898	BPESC1	1155	963	963	949	1013	894	966	821	588	934	702	748	462	637	778	540
GGAACTACGTCGAAGAGGGAGACG	TRCN0000466899	EEF2	1288	1159	862	796	866	662	685	809	754	671	751	814	437	1008	674	1110
CGTCTATCTTTTACGTATTCCCAC	TRCN0000466901	NO_MATCH_139	1129	1055	791	872	805	758	622	751	741	431	363	612	818	691	731	568
ACCACAGTACACCCTTGCTTCGCA	TRCN0000466902	TUBB	40	24	58	15	73	11	67	37	10	6	7	54	14	1	7	0
ATCAACATTTATAATTTCGACAGA	TRCN0000466904	EMR1	4	8	12	9	0	12	40	34	13	11	0	2	0	0	6	0
TACAAGTACATGTAGTCAGCCATA	TRCN0000466905	TFPT	2012	2021	1780	1846	1522	1419	1102	1406	1171	1594	998	1184	1385	1323	1380	1243
AACAGACCGCCGCTGATACATACG	TRCN0000466906	MAST1	75	60	44	15	43	12	37	30	47	27	18	21	55	7	15	47
AAGATGATAGTCAGCAAGCCAAGG	TRCN0000466907	U2AF1L4	2426	1874	1548	1717	2066	1850	2136	2046	1842	2078	1484	1936	1463	1958	1678	1664
AGTGGCGTCGTCTGATCTGAAAAA	TRCN0000466908	MRPL49	1605	1407	1121	1316	1166	1581	811	1106	1027	827	1004	815	896	967	720	1067
ATATTATGATTATTGTACTAATCC	TRCN0000466909	GLRX3	43	46	11	12	36	22	24	47	31	4	25	26	28	6	65	17
CCCCCAAGAAGTAACGAAGAGGGA	TRCN0000466910	PHF5A	5784	5763	6081	6498	3250	3424	3407	3247	3348	3368	3313	3126	3069	3032	3667	3075
TCTCCCGACCTTGTTACGGACCAA	TRCN0000466911	RXRB	2322	2235	1758	1899	1413	2095	1573	1581	1553	1944	1595	1395	1215	1384	1288	1559
TAACGGTAGTCAGATCAGTGCATC	TRCN0000466912	OPCML	4745	4626	4485	4302	3723	3758	3602	3823	3617	3332	3583	3120	3030	2944	3085	3138
CTCAGGTTCATGAAGTTACTCGTT	TRCN0000466913	RBFOX1	2208	2188	1421	1334	1754	1584	1882	1383	2300	1773	1664	2133	1516	1604	1692	2004
ATTTAAACCAAGGTTTTCACCTTT	TRCN0000466915	AUP1	1232	864	737	638	1125	1193	1342	981	1130	1027	774	965	878	880	1037	1263
TAAGGGTGCGCGTCTAAAGGAAGA	TRCN0000466916	LACRT	4989	4533	4842	4508	4105	3326	3356	3530	3484	3160	3421	3432	2676	2896	3168	3301
ATATCTAGCATTCAAACTCTACAT	TRCN0000466917	USP37	1620	1375	770	995	1745	1286	1428	1345	1057	1450	1153	925	989	1369	1084	1279
ACAGTTATCTGCATCTACACACCT	TRCN0000466918	PDILT	1681	1598	1395	975	1201	1148	1352	1331	1127	1019	1059	1219	1096	1128	1235	1005
CTCCATATCTTCTCTAGTATATTA	TRCN0000466919	APCDD1	845	685	538	427	592	572	483	540	774	566	695	564	542	540	391	521
CTTACGAAGTAAATTCTCACCAAT	TRCN0000466920	NR1I2	1337	1080	1238	892	833	808	989	968	1007	1068	819	831	859	811	936	886
TCGAAGCCCTAATCGTCAAGTCCT	TRCN0000466922	CXCL3	2526	2435	2318	2650	2084	1868	1746	1793	1417	1504	1533	1563	1687	1557	1422	1630
GCTGACTAAAGAAACCACTCAGTG	TRCN0000466923	DPY30	15	2	4	4	15	18	6	0	9	5	15	0	0	5	9	6
TAGCATTTGAACGATATGTGGGTC	TRCN0000466924	IDH3G	1434	1213	1125	943	1068	821	867	848	894	792	933	999	762	807	760	1107
GGTTCACAGTTTTTGAACTCAACC	TRCN0000466925	CHI3L2	2565	2470	1970	1961	1765	2045	1899	1586	1594	2109	1458	1865	1841	1638	1564	2023
TACCTCGCCGGTTGCGTTCGGTTC	TRCN0000466926	PZP	55	62	27	109	51	88	24	27	19	57	38	39	45	63	0	34
ACAATTTAATTCACAAAATTTTTC	TRCN0000466927	CHRD	2405	2170	1722	1751	1557	1764	2099	1648	1685	1895	1965	1797	1453	1830	1650	1696
AAAGATGGGCGAAGTCCGGCACCA	TRCN0000466929	ABCA11P	925	775	904	531	683	633	709	717	898	749	604	591	637	645	789	670
TCTTGAACCTCGAGATTATGACTC	TRCN0000466930	SLC25A44	1766	1566	1237	1143	1146	1521	1170	980	1436	1439	956	1528	1032	1114	1071	1021
TAGCCCGGTCTCGACCTCAATAAC	TRCN0000466931	ODF2L	2288	2213	2149	2031	1701	1853	1628	1761	1608	1581	1445	1634	1421	1493	1254	1192
AAAAGCACTTGGCGTCCAACCTGT	TRCN0000466932	RPP25	734	547	516	432	582	670	633	618	491	563	491	463	543	563	606	553
TGTGTTTCTCCCCGGCAATAGAGC	TRCN0000466933	POLE4	2265	2208	2462	2025	1691	1770	1526	1813	1580	1343	1843	1638	1392	1491	1747	1374
AATTGTACTGGTACGATGCTTTCG	TRCN0000466934	ACOX2	789	562	357	267	601	682	706	628	621	463	496	526	557	414	509	507
CACCTCTGGTTATAGGTGCTGATA	TRCN0000466935	LYPD5	1854	1857	1865	1682	1555	1195	1443	1473	1227	1372	1071	1327	1231	1072	1222	1430
TGAGCTCAACGTTATCTTCTCGCG	TRCN0000466936	NOTUM	1169	1175	988	1459	590	690	555	682	759	924	771	689	743	577	616	526
TTCGCATTGGCCCGTCCAATCATC	TRCN0000466937	HSD17B8	1934	1688	1591	1499	1489	1251	1638	1463	1358	1263	1450	1161	1230	1328	1215	1421
CTGACTCAGCCGCGCGCCGTCCTA	TRCN0000466938	CAPG	729	599	627	651	519	415	552	492	467	456	476	560	523	407	435	488
ATTAGCGAAGTGTTGCCACCTGTG	TRCN0000466939	RASSF4	851	609	414	420	742	721	836	674	788	608	622	620	438	493	838	615
ACAATACCCGGATAGGTCCACTCT	TRCN0000466940	TMEM256	4152	3908	3927	3897	3387	2970	3306	3304	2865	2915	2646	2405	2498	2914	2526	2745
TCTGTCGACTCCGTCACCAGAGAT	TRCN0000466941	CDK5R1	406	333	206	255	263	237	215	234	259	230	295	182	209	183	144	406
CGAATCTAATAAGTATAACGCTGT	TRCN0000466943	DTX3	1870	1825	1463	1803	1393	1350	1518	1278	1429	1193	1212	1308	1123	1121	1113	1086
TATCTTCATCGTTGTCGTTGCAGG	TRCN0000466944	GCM2	1030	828	265	360	536	628	821	735	801	583	459	584	674	536	578	466
CACTTTGTAGCGCTGGGGCCCTAC	TRCN0000466945	SRP9	3411	3093	3719	3263	2069	2237	2641	2222	2210	2395	2341	2488	2072	2240	2087	2016
CCCCACATGGCGCCATGTGGGGGC	TRCN0000466946	ACADS	173	136	102	110	173	151	136	136	136	65	67	87	59	102	177	101
CCGTTTGACTCAATTATGTGCTTA	TRCN0000466947	ZSCAN26	2760	2899	2761	2481	2126	1677	2046	2170	2050	1941	1666	1900	2047	1773	2312	1565
TTTAAAGCAATGTTTATTCGGAAC	TRCN0000466948	RRM2	1467	1052	718	951	951	1741	1229	993	1038	1629	1073	743	963	916	850	905
AATCTATCATGCTATATATCGTTA	TRCN0000466949	CLCC1	118	77	24	75	112	76	130	123	153	62	75	155	112	73	56	110
AAAAATGGGCGCTCTGAGACACAC	TRCN0000466950	ZNF680	395	243	115	117	366	304	368	221	211	170	280	284	245	213	275	246
CTTCCGCGACGGGCGACCCGGAAC	TRCN0000466951	RBM4B	1285	1194	1092	932	1094	998	1076	1004	965	943	902	1015	905	939	859	816
CGATTGCCGTTTTAGCATTAGGCG	TRCN0000466952	LAPTM4A	9992	10431	11522	10859	6976	6904	6932	7504	6997	5941	6831	6911	6297	6493	6104	5988
TAAAGTCTGCATATGCCAAGCTGG	TRCN0000466953	SNAP47	6467	6178	5747	5923	5340	4748	4882	5087	4303	3943	4512	4283	3802	4504	4310	4629
CGCCCAAGTATTAATTACCCAGTC	TRCN0000466954	40794	664	831	806	499	421	642	528	487	456	371	394	221	275	251	585	348
GTGCAGCCCAAAGGGTGCATCTCC	TRCN0000466955	MRPL18	337	337	284	251	332	298	237	219	267	253	299	312	192	252	204	179
AGTAAACTATATCATTCACATCGA	TRCN0000466957	GALNT6	109	61	25	46	88	87	22	69	93	58	91	42	106	86	80	102
TGCTAACGTTGTCCTTGTTTGCCC	TRCN0000466958	ZNF264	145	185	144	77	229	162	140	147	91	52	45	99	52	65	13	96
TGATTTTGACAGATTGTTTCTGGC	TRCN0000466959	ZDHHC22	867	881	849	1210	586	776	770	618	434	531	609	610	633	793	463	489
TGTTCACCGCTGGTTGAATTGGAA	TRCN0000466961	TECRL	0	0	0	0	0	0	0	0	0	0	0	0	0	0	0	0
ACAAGATGGATAGCATCTCGGTTG	TRCN0000466962	ZNF131	6	16	3	2	7	0	0	11	0	20	21	0	0	0	0	0
TGTCGCGCTGGACGTACAAGTCTT	TRCN0000466963	CHMP4A	1807	1612	1685	1711	1441	1251	810	1023	1265	1008	1140	1320	880	781	852	799
TACCGGGCAGGACGAATCGCAGGC	TRCN0000466964	CDO1	2242	2291	2430	2707	1347	1227	1602	1530	1783	1275	1502	1724	1297	1897	1733	1441
GGCGGTGACCAAATCACCCCTTGC	TRCN0000466965	AICDA	2913	3035	2986	2800	2420	2052	2068	2009	1874	2262	1400	2098	1860	2133	1973	1795
GACGGAGTTGGTCTGACTGTAAAT	TRCN0000466966	RAD51D	274	262	246	284	251	257	249	256	144	192	205	195	159	151	123	196
TAACCAAGCCATCAACATTGAGGC	TRCN0000466967	NSMCE4A	3399	3341	3324	2819	2121	2166	2114	2211	2134	2527	2197	1926	1605	2020	1930	2243
CTAACCAAGCCGTAATTCCAATCG	TRCN0000466968	TECR	4086	4124	4045	3586	2973	3099	2870	3335	2652	2635	2961	3204	2671	2576	2523	2618
AATCAGTGCATCGAGCAACCATTA	TRCN0000466969	NO_MATCH_18	919	872	661	705	897	780	796	810	849	796	741	822	560	901	836	666
CGTCACTACGCGACTGGTTTAGTC	TRCN0000466970	NO_MATCH_137	750	697	571	761	629	462	498	519	437	565	387	413	437	446	502	456
TTAAGTTAGCCAGTTCCTGTGTAT	TRCN0000466971	BCL2L2	1697	1490	1501	1543	2250	2092	2501	2355	2319	1951	1809	2129	1922	2178	2477	2562
TGGCTTTTGCAAAACTGACTTGGT	TRCN0000466972	VSX1	1003	911	1071	914	815	508	856	673	743	642	498	720	708	343	603	753
GCGCCCTTACAGAGCGCGTTGTAT	TRCN0000466974	LOC81691	553	464	261	271	439	465	433	443	448	268	413	368	415	303	439	490
CGTACTACTGGTTGTAATCGATAG	TRCN0000466975	NO_MATCH_135	1252	1277	1149	1995	821	897	581	812	658	928	662	823	776	848	616	573
AAGATTGACTTAACAATATTTTCA	TRCN0000466977	PRAME	567	486	262	281	501	419	349	416	435	370	379	393	289	376	380	415
TTACTTGGCCAGTTCCACACTACA	TRCN0000466978	PSG1	905	850	812	532	764	827	912	782	641	627	699	445	681	660	692	744
ACGCTGAGGCCAGTGTCCTACTAC	TRCN0000466979	NOB1	756	568	553	666	487	508	477	487	495	477	324	523	333	322	512	410
ATAGACGTTACGCATTAGAGGAGG	TRCN0000466980	TSEN2	538	435	271	358	515	453	417	326	382	538	267	408	446	328	367	312
ACGAACGGCGAAGTCCAAAGCAAG	TRCN0000466982	EMC6	1317	1371	1715	1776	1127	1085	1103	1161	853	906	1192	934	813	859	937	1018
TATCGTATGCAGTGATGCCATGTC	TRCN0000466983	ZNF626	1021	955	911	868	737	572	720	750	809	340	560	616	629	694	713	704
AACCGCTAGTGGTACGGCGCCTCA	TRCN0000466984	LASP1	450	308	256	252	376	356	369	319	430	362	286	236	328	233	212	256
CATCTGGGATGTCAAGACGTACAA	TRCN0000466985	PLEKHG3	188	124	57	54	121	97	111	133	54	105	69	92	130	89	132	108
TCACGGGATGAGCTCCAAAAATGA	TRCN0000466986	HIST3H2BB	2827	2727	3441	3099	2265	2643	2029	1722	2006	1960	1879	1819	1517	1966	1820	1882
TAGGGTTTGACCTTCGTCGAGAGG	TRCN0000466987	SP6	1692	1324	997	1044	1241	1322	1080	916	872	1071	918	1029	938	752	1271	1170
TTTGATACTTCGTTTTAAGAATTT	TRCN0000466988	CD8B	619	488	326	300	608	474	556	548	609	462	1150	484	392	488	386	575
CCATTAATTGGTTTACTCTGACCC	TRCN0000466989	RIT1	1998	1986	2247	2042	1567	1286	1544	1319	1500	1428	1856	1398	1195	1257	1504	1252
TAGACGGTTTTATACGCTCAGCCA	TRCN0000466990	EFHD1	545	477	514	543	366	437	363	310	416	364	252	435	258	206	231	536
CCCTGTGGATACATCTAACCATGC	TRCN0000466991	AP1AR	2601	2572	2362	2046	2074	1668	2327	2046	1682	1607	1708	1863	1216	1824	1933	1668
ACTAGTCCCATTTAAAGACCATTC	TRCN0000466992	FBXO3	963	794	696	558	862	839	847	527	710	694	670	818	560	520	610	442
CTGAGGTAACTTTCACCTCCACCT	TRCN0000466993	MGRN1	1064	1187	1011	796	716	880	896	911	643	736	839	652	637	767	710	776
GGAGCTTACAACCGCTGACGTTAG	TRCN0000466994	SLAIN1	3698	3534	3159	3147	2238	2358	2747	2313	2327	2493	2356	3171	2422	2203	2433	2291
AATGCCTGTAAACGACAACTGTGT	TRCN0000466995	ASF1A	2767	2191	1871	1894	2201	2299	2230	2450	2191	1990	2136	2241	1933	1848	1991	2099
AACTTACCAGCTTGCCCCCCGTCA	TRCN0000466996	LY6H	2460	1885	1592	1754	2029	1899	2139	1897	1849	2028	1729	1755	1477	1716	1843	1743
TGGTGTATAAAAGTACCGACCGTC	TRCN0000466997	AP4B1	636	515	310	485	312	381	495	360	339	357	226	202	193	304	334	615
CCAAACTCTCTTCACTCATTACTC	TRCN0000466998	BTD	2693	3199	2296	2488	2352	2117	1909	2226	2178	1909	1976	1826	1665	1550	1620	1745
GAGTCGCTCCAGCTTCTTACAACA	TRCN0000467000	TBX22	1187	1123	643	481	792	742	698	842	636	574	526	660	809	693	741	893
TATCTTTTAGTCCTAATTAGTTCC	TRCN0000467001	PIKFYVE	616	408	265	437	473	482	508	419	416	358	561	278	281	491	362	365
GGTTATATTCTAATGCGACATACC	TRCN0000467002	RUNDC3A	1183	1153	801	764	1144	903	886	802	766	873	821	916	788	804	898	841
ACATATTCCTGAGATAGCATTCCT	TRCN0000467004	PHF20L1	828	841	570	487	597	907	734	603	497	437	619	776	548	738	623	759
TCACATAAATCGCGGGAGCTGACA	TRCN0000467005	SLC25A39	2661	2487	2100	2300	1928	1860	2122	1656	1668	1604	1590	1689	2019	1849	1813	1670
AACACAACTGCTTAACGTGATTGC	TRCN0000467006	SERINC2	1403	1225	1217	1147	1215	1029	1049	898	970	923	842	820	835	917	664	1042
TACTGCGCTTTGTGACAAACGGTT	TRCN0000467007	CSF1R	845	608	635	630	528	320	773	412	596	649	362	644	572	547	562	622
CCTAATCTACTCTTGTATTGAAAG	TRCN0000467008	HK2	173	144	114	41	181	81	113	91	72	95	202	93	56	43	98	17
ATACCCTGTCGGTTGGTCAATCAC	TRCN0000467009	ULK4	511	453	241	309	230	509	423	436	425	277	286	418	227	210	309	238
CATTAATGCTATATTACTCACAGA	TRCN0000467010	CSNK1G2	361	410	197	262	298	321	388	341	259	161	309	216	173	220	255	265
ACTGTTACGCCTCCAGGACCGCTA	TRCN0000467011	AK2	1889	1603	1277	1247	1178	1487	1780	1401	1459	1171	1279	1272	1138	1018	1041	1310
GACCTTCGTGTCCCGTTGGGCACG	TRCN0000467012	IKBKE	239	191	92	110	82	174	98	90	216	160	72	72	126	149	122	168
TAAAAGTATTAAACATGTTCTTAT	TRCN0000467013	HIST2H2AB	241	196	446	183	213	146	163	102	139	172	49	187	123	91	158	177
TTGCCATGATGAACCCCCTTACCA	TRCN0000467014	TPM3	809	762	612	835	740	560	640	522	578	537	531	841	562	563	586	393
AAACGAGAGTGGATTCCGGTTATC	TRCN0000467015	CABS1	509	414	343	295	412	483	404	393	497	323	328	451	364	324	350	424
AACAATATACGTGGATATGACGCA	TRCN0000467017	PRKACG	259	257	236	250	213	200	288	309	219	192	271	228	205	221	197	342
ACGCATAGGCGATTCACTTTACGA	TRCN0000467018	ZNF23	855	809	403	454	526	756	737	542	491	570	693	534	306	439	426	499
CGTGGCCACCAATAGGTCAGCGGT	TRCN0000467019	TTI2	3827	4396	3778	3511	2828	2817	2965	3240	2234	2291	1992	2487	2126	2270	2404	2557
TTCATTTTCCATGGAAACCTATGT	TRCN0000467020	SLC25A33	84	63	65	46	94	71	195	116	43	36	31	61	75	96	37	38
GAGAAGGTCCATTGGGGCTGACTC	TRCN0000467021	CPT1B	1429	1316	1023	915	1130	1079	1130	1237	1012	999	984	880	880	1026	921	1158
TGCTTCTGCTGGGTACGCTTGCTA	TRCN0000467022	SIDT2	1652	1463	1117	951	1058	848	1024	1346	845	814	1045	1111	954	691	748	803
ATTACAAAATGAAGAGACTAGAAG	TRCN0000467023	TKTL2	74	17	25	16	49	41	38	50	42	17	16	38	102	13	35	26
CCAGATAGTCAACAAACTCACATC	TRCN0000467024	TM2D2	2010	2251	2074	1878	1169	1431	1348	1492	1268	1187	1196	1334	1324	1165	1262	1168
CCATGATCGTCGAGCGAATAGGTC	TRCN0000467025	KIF24	942	849	628	489	792	500	628	501	692	595	569	561	509	745	538	538
AAACTACTGAGCCCATGATGCACT	TRCN0000467026	KRTAP10-3	4537	3408	2714	3128	3863	4033	3840	3333	3471	3393	3255	3145	3125	3023	3053	3360
CGTGATTGTCTTAACGCGGAATCC	TRCN0000467027	PDIA3	23	24	15	41	0	11	57	18	2	39	0	34	12	0	21	0
CGACTAAGAACAGAGCAATGAGGG	TRCN0000467028	ETNK1	1015	1070	1020	764	751	583	718	519	847	771	568	558	647	786	524	806
CCCACTCCTTGTCATCCAGAGAGG	TRCN0000467029	PBDC1	1839	1763	1486	1635	1123	1367	1152	1459	1312	1549	1214	1053	1308	1069	1298	1054
CCCCGAAGACACACTGGGCAACCC	TRCN0000467030	ARF5	1817	2033	1883	2021	1292	1708	1398	1342	1395	1248	1099	1502	1179	1094	1387	1158
TCATCGATATATTGTGACTATTAG	TRCN0000467031	MRPL39	497	441	460	458	431	520	424	536	504	396	287	422	322	318	352	450
AATGGGATCCGGTGGTTCCAGCAG	TRCN0000467032	GRAP2	194	114	83	97	121	90	93	96	121	102	103	51	167	163	157	144
TATCTGGGCGCTCCACACCTACCC	TRCN0000467033	FAM175B	2177	1931	1562	1865	1705	1551	1574	1295	1494	1575	1437	1632	1410	1641	1545	1257
AGCACTCCACTGTAGAATCTAGAC	TRCN0000467034	CNDP1	257	271	202	230	166	203	156	274	136	250	169	284	148	199	174	211
TAGACGGCAAACCGAACAATATTT	TRCN0000467035	RPS4Y1	1751	1516	1272	1605	1065	866	1358	1021	1040	1192	1245	1194	1130	1152	998	1141
CCCGTTGAGCGTCTTGCGCTGGGC	TRCN0000467037	MTMR14	2550	2585	1719	2056	1798	1798	1990	1909	1879	1817	1489	1405	1482	1316	1746	1369
ATGCTACGCCCGAGCGTATCCGTA	TRCN0000467038	SULT1A3	796	597	645	668	813	546	645	756	516	448	522	419	472	478	480	580
TTGTCCAAACTAATCCGTTCCGGA	TRCN0000467039	TESPA1	1157	1025	765	706	899	1070	851	960	767	889	763	649	650	818	822	766
GACATATCCCTACTGGACTTCCCC	TRCN0000467040	PGLS	2038	1861	2209	2074	1542	1528	1755	1756	1298	1524	1350	1510	1125	1164	1387	1229
TAGGCTAACGAATTTCATACGTCC	TRCN0000467041	CDADC1	5007	4715	4600	4487	3817	3408	3705	3140	3573	3096	3779	3205	2832	3237	3087	3273
ACCCCTACGATCTTGCTGCGAGAT	TRCN0000467042	IL23R	3942	3666	3303	3711	2911	2556	3336	3157	3144	2922	2685	2672	2525	2728	3244	2752
CTCTCAGATTCCCATTCCCCGGAA	TRCN0000467043	CACNA2D4	1010	897	909	743	834	773	781	593	630	569	631	497	530	544	806	502
GCTTAACGGAGGCCGATTATCACG	TRCN0000467044	ZNF550	1762	1782	1375	1215	1398	1650	1337	1406	1309	1153	1433	1405	1444	1123	1408	1451
ATTCCTTGAAGTCGGTAGCTTGTG	TRCN0000467045	ZNF764	353	259	185	194	252	308	333	274	294	259	318	209	288	195	312	229
ACCTGGACCTAACAACAGGTACAA	TRCN0000467046	C1orf27	472	473	323	250	387	553	276	286	382	368	426	179	357	297	274	322
AAATTTTAGCTTCAAAAGTCAAGT	TRCN0000467048	NDUFA7	927	644	477	430	685	716	689	825	731	571	593	584	546	585	730	923
TTGATAAATGTCCAAAATACATCT	TRCN0000467049	FAM32A	314	191	74	39	176	123	103	132	161	91	160	122	134	121	98	145
ATAGCCAAGTAGACCCTCATTTTT	TRCN0000467050	SPHK1	717	587	431	527	545	594	612	427	464	624	459	667	559	474	411	561
CACATCTCGATGTGCCCCTACTTC	TRCN0000467051	TTC9B	3453	3305	3429	3276	2444	2464	2403	2721	2617	2244	2353	2171	2446	2399	2270	2539
AACGGTAAACGTGCGTAGCCTCTG	TRCN0000467052	RALGAPA2	571	509	429	476	532	554	411	339	402	485	324	335	395	353	383	482
TCCTGGTGCGGGTACCTTCGAGCA	TRCN0000467053	RAC2	1927	1799	1551	1819	1386	1167	1252	1302	1383	1303	1141	999	930	1049	1235	1268
AGTCATTATCCACTGCTTCTACTG	TRCN0000467054	DOCK8	2630	2237	1600	1797	1790	1986	2326	2224	2039	1763	1822	1887	1633	1634	1858	2143
TTCCACGCCAAAAAACCCCTTACG	TRCN0000467055	OR10W1	293	252	189	250	188	234	276	155	243	169	178	126	45	123	214	155
AGATTTTCATGCAACTTTTCTCGA	TRCN0000467056	MT1E	2228	1696	1450	1637	1765	1586	1730	1844	1600	1632	1385	1431	1234	1576	1420	1424
CCTCTATCCGAATTATGGTTCAGC	TRCN0000467057	ASPM	31	19	12	14	24	4	1	2	0	8	67	52	25	31	35	30
CCGGTGCGTTAATTACAAGCCTGG	TRCN0000467058	HEATR1	5025	5166	5488	5586	3660	3273	3508	3491	3436	3322	3284	3469	2624	3615	2532	3305
CCGGAGGTCTCTCACAATCTACTA	TRCN0000467059	TMOD2	541	541	448	366	385	445	292	439	365	410	380	580	274	422	448	320
GCGGAGGTTCGGGACTCGTTCATC	TRCN0000467060	NMUR1	2119	1993	2099	1923	1609	1528	1486	1521	1609	1633	1024	1665	1413	906	1427	1019
ACGAAATATTGCTAAGACTAAATC	TRCN0000467061	GALNT15	9	8	1	3	7	14	13	4	8	23	14	0	12	17	4	9
ATAGTAGACTGGCCCTGTGATGCC	TRCN0000467062	FSBP	2084	1723	1623	1695	1914	1713	1722	1885	1539	1388	1549	1310	1227	1475	1502	1819
TCGGACAAAATCTCATTTTCATAA	TRCN0000467064	EZH2	537	523	418	338	315	611	592	374	378	619	419	331	307	398	348	339
CAGCGACGATACGTCTCCGCGCAG	TRCN0000467065	GABPB2	1863	1835	1835	1766	1285	1491	1582	1361	1327	1262	1089	1238	1122	1257	1193	1187
TCTGATCAAATTACTATTACAATT	TRCN0000467066	PPP1R7	702	698	429	367	512	459	549	485	594	553	664	516	510	752	364	517
TTGCGAAATGGGACGTCCTCAGGT	TRCN0000467068	IP6K1	520	479	390	311	422	306	416	365	375	380	287	261	276	545	382	297
GAAGAGGTACACTCTACTGTTCAT	TRCN0000467069	UBE2L6	2089	1874	2101	2039	1584	1332	1621	1602	1156	1756	1439	1708	1294	1403	1290	1668
CGTCCTCTCCCGCCCGCTTAGCAG	TRCN0000467070	XLOC_l2_001669	730	692	604	684	589	476	588	500	403	443	502	431	396	373	398	502
GCCGAGATTTATCTGATCGGGAAA	TRCN0000467071	TPD52L3	2309	2222	2293	2279	2115	1761	1817	1725	1898	1585	1431	1738	1174	1237	1645	1765
CTGGAACAGATCCCTCCGACATAA	TRCN0000467072	PRKCG	504	595	329	442	406	387	198	401	259	340	362	485	307	280	284	350
TGCAGCGACGCCTCGATCAATGGT	TRCN0000467073	MAP3K19	197	165	241	266	158	130	95	196	147	94	110	111	136	62	98	96
TGTTATTAGCTCGGCAGTGATAAT	TRCN0000467074	PRMT1	1271	1199	894	1249	866	665	684	858	1073	802	1075	1152	741	985	863	986
GAATTTCCCGCCGTAGCTTTTCAC	TRCN0000467075	KCNMA1	1716	1395	1329	1287	1706	1459	1411	1365	1324	1370	1213	1313	1173	1347	1285	1048
ACCGTTCCATCCTACGTAGTTTCC	TRCN0000467076	DLX6	1705	1459	840	1306	1345	1233	1315	1113	1263	1153	1165	1226	1142	1157	1425	1672
TTCTAACCTCCATTATGTCATTCT	TRCN0000467077	CARNS1	1818	1570	1356	1116	1561	1280	1690	1391	1344	1417	1384	1063	1304	1338	1160	1180
GTACCATCTACACTATCAATTAAC	TRCN0000467078	CABP1	1675	1488	1074	1087	1105	1023	1388	1157	1057	1312	919	1119	1283	1015	1191	1343
TGCGAGCAGGACAGGTGCAATGTA	TRCN0000467080	NANP	7560	8409	7670	9261	5640	5398	5438	5763	4682	4851	4731	5513	4757	4900	5189	4805
AATGGGAAATGACATTGAAAATTA	TRCN0000467081	RAB3A	1870	1453	1137	995	1506	1839	1573	1271	1542	1553	1135	1604	1274	1203	1344	1237
AAGGCTGCAACCCTGACGCTCCCA	TRCN0000467082	RAD51C	3752	2779	2486	2685	2991	3112	2957	2650	2338	2818	2341	2870	2241	2203	2544	3533
CGCCGCCAACGAATGTACATCACT	TRCN0000467083	ARHGAP29	201	127	105	84	80	70	136	124	66	172	116	131	31	125	66	204
ACCGATTTAAGGTTGATTACTGGG	TRCN0000467084	ZC3H7A	258	239	172	186	185	213	149	217	117	231	144	100	158	288	102	141
ACTCCTGGGAGTCTCCGGCAATGA	TRCN0000467085	RPS11	109	77	71	84	39	86	28	98	64	79	62	112	92	113	82	117
TGGGTCATAACATCTGTTCATTTC	TRCN0000467086	PIGR	2006	1941	1558	1516	1266	922	1674	1481	1297	1015	1389	1388	1073	994	1052	1161
CATTGACAGCCTATTAACGGATAT	TRCN0000467088	SMCO1	7463	7137	6836	7169	5440	5185	5038	5342	5355	4563	5039	4490	4318	4802	4768	4721
CCAGTTTAGAATTTATGGACCGAA	TRCN0000467089	PTPN3	1233	1245	1049	614	754	1017	1137	954	1031	706	690	716	838	598	617	726
TTTGCATTTCGGACCAAGTGCCTA	TRCN0000467090	FAM167A	2487	2223	2031	1748	2186	2003	1851	1739	1445	2235	1854	1901	1472	1851	2007	2160
CGAGCGGAACCCCGGGGAAAATGA	TRCN0000467091	DDX53	85	125	19	62	90	19	139	69	108	44	25	2	73	1	98	53
TCATCAATTAGCTCTATATGTTCT	TRCN0000467092	CLHC1	17	9	0	2	22	0	0	12	12	0	0	5	0	0	0	11
GTTACGCTAACCGCTGATAGGTTA	TRCN0000467093	TCF25	463	406	321	287	407	337	431	422	311	461	350	373	407	326	329	371
CAAGTGTCCTCTAGTGCTCAAACC	TRCN0000467094	PEPD	220	166	173	160	188	99	114	174	136	127	109	99	154	104	103	99
CCCTTGATCCAGACTGAGTATTTA	TRCN0000467095	LPL	838	923	702	652	628	754	516	575	784	586	405	810	609	554	628	394
TCATAGAACCTCGCCTAGACGACG	TRCN0000467096	DCUN1D1	311	243	272	246	260	207	250	262	172	203	238	125	177	158	175	117
ACACAAACGCTCATCAGCCCTGGC	TRCN0000467097	CD300LB	1659	1651	1605	1545	1058	1061	1107	946	1126	1156	1045	945	1141	856	1166	1007
CCTCCTCCAGTGATCTTTCCTTTG	TRCN0000467098	MAN2B1	19	8	2	5	12	0	4	0	27	0	7	0	1	0	1	1
TGGTAACCACAAGTGCTACCTGCA	TRCN0000467099	TGM2	1403	1377	1330	1157	825	1195	746	1075	918	1132	724	797	805	911	692	955
ATAAATGATAGGGGAGCCCGGGCA	TRCN0000467100	NKIRAS2	1139	885	677	810	907	852	818	879	856	888	750	866	726	685	608	702
GTCAGCAAGTATGTGTCTGACAGT	TRCN0000467101	SAP30BP	301	234	180	153	155	126	88	212	172	133	264	107	64	83	191	147
GCTCACCGGGGCTCCGTACAGTTT	TRCN0000467102	UFD1L	1180	1099	1227	1274	708	919	1002	803	875	671	778	989	954	1039	975	670
CGGCACTTCAGCGCTGGCAACACT	TRCN0000467103	XLOC_l2_015937	6265	6569	6559	7216	4351	4705	4952	4441	4556	3670	3548	4316	4108	3751	3902	4200
CGGTGCTGTTCTCGTATACTCTGA	TRCN0000467104	COPS7B	2706	2898	3097	3107	2159	1802	1897	2020	1662	1799	1741	1851	1272	1862	1685	1506
GATCTTTCCCTTTTATTAGGGTTA	TRCN0000467105	ID1	1150	930	1093	893	882	884	976	906	920	904	970	888	756	952	812	1003
AGCGATGATACCCTAACGCCTAGG	TRCN0000467106	LMO3	4897	4658	4989	4822	3990	3604	3407	3675	3666	2953	3246	3163	2868	3172	3549	3632
GTTATGTTGGCCATTTATTACTCA	TRCN0000467107	CPLX1	1087	835	667	633	893	1044	816	814	764	771	854	889	751	781	748	667
ATCGAAGTGTATTTATCACAGTGT	TRCN0000467108	TES	1312	1162	800	742	1032	1126	897	1170	1188	950	867	764	773	905	874	788
AGTGCGATACACCGCATTCATCGA	TRCN0000467109	BRF2	1842	1620	1144	1171	1494	1037	1816	1231	964	1296	1198	1109	1005	1165	1078	980
CAACAAGTCGCAGGAAAAGTCGAG	TRCN0000467111	INTS5	401	440	304	280	270	217	294	188	239	249	113	244	203	209	219	385
TTTTACCGAACAATGCGTGCGCGC	TRCN0000467112	FCF1	2371	1789	1710	1258	2090	1792	1882	1905	1878	1642	1788	1422	1676	1672	1814	1811
AAACACGCAGTACTACAAACCGAG	TRCN0000467113	Hoxa10	1471	1187	1012	1051	1309	1186	1348	1099	1131	1108	1170	1268	763	1102	1189	1327
ATCCATATCAAGTGAAAACGTATG	TRCN0000467114	RTKN	1227	1083	1074	841	1001	1150	1058	948	979	815	905	834	802	741	901	807
GGGACGAGTTGCCCCCCCGATCGG	TRCN0000467115	PPID	1720	1742	1345	1221	1331	1396	1675	1530	1459	1265	1630	1241	1156	999	1363	1325
AGGAAAGTCCTCACAACCTTAAGA	TRCN0000467116	HLA-E	1324	1192	950	1078	711	922	735	720	961	928	768	857	859	843	731	854
ATGTGTCCCAATCTGATGCATCTC	TRCN0000467117	G6PD	672	509	401	456	555	397	633	381	412	344	411	338	464	394	500	504
GGACGTTGCCGCAGGCCATCTAAC	TRCN0000467118	WAPAL	2351	2197	1694	2050	1653	1490	1418	1452	1754	1906	1344	1457	1433	1070	1543	1180
CCTCTCCCACGGCCTAATGCTCAA	TRCN0000467119	40786	1003	964	788	684	739	667	633	732	650	642	576	786	572	459	787	732
TAATGTATCAATGAGGATACCAAA	TRCN0000467120	C19orf40	1954	1669	1475	1713	1479	1267	1591	1282	1200	1398	1303	1065	934	1179	1284	1232
TACAGAGCGCGACATTTACCCTTA	TRCN0000467121	ARAP3	2800	2740	2713	3233	2230	1847	2156	2253	1816	1863	2106	1756	2089	2053	2211	1816
CTCTAGGACAGCTATTCCGGCATA	TRCN0000467122	CX3CL1	1866	1832	1884	1667	1479	1624	1601	1484	1358	995	1257	1688	1312	1157	1189	920
GGCTTCTCACGATCCGCATATTCC	TRCN0000467124	TWISTNB	692	702	612	512	481	538	455	625	440	557	486	720	404	468	559	492
TTAGATGTCCGTACCCCCACATTC	TRCN0000467125	SERPINB11	1731	1530	1567	1218	1261	1199	1260	1349	1104	1078	1345	1268	1304	1068	1225	1415
AGGTTATTAATACCTTTACCCCGG	TRCN0000467126	LINC00597	183	122	121	78	125	86	45	86	84	58	189	68	110	61	88	201
CAGAACAGTTGGTCTGCACCAGTT	TRCN0000467127	OCLM	149	204	255	280	112	99	313	193	72	78	150	105	59	76	138	181
AAGAATATGTGGTAGTGCTTGATG	TRCN0000467128	AMT	735	600	389	435	521	563	732	605	584	512	343	665	561	485	480	595
AATGAGAAATCGCCCGGTTAGTGC	TRCN0000467129	TMEM129	1104	1072	733	752	960	1055	1082	910	880	1036	1039	756	886	956	790	1150
TCGAGGTAGCACTGCGTTGTGACG	TRCN0000467130	LEFTY1	1724	1614	1411	1479	1287	1396	1391	964	1222	1146	1154	1018	1111	1158	933	908
TAGACCAACTACACCAAACAAGCG	TRCN0000467131	FAM213B	1737	1567	1606	1619	1040	1386	1496	1060	1174	1241	1041	908	787	1138	1283	1213
TCTCCGCAAGCTAGCCTTGTTAAG	TRCN0000467132	PGRMC2	2248	2009	1518	1352	1206	1563	1411	1594	1698	1367	1675	1361	1228	1463	1107	1120
CAATGTCAGGACATGAAGTCAATG	TRCN0000467133	CAMP	2807	2645	2512	2730	2407	1750	2000	2202	1907	1427	2005	2025	1817	1810	1821	2076
TGAGGCTATTGACGCAGGCGAGGC	TRCN0000467134	BCDIN3D	2608	2455	2453	2313	1767	1690	1964	1855	1997	1566	1964	1379	1545	1253	1889	1640
GCCGCTTACCTCTTTAAGGCTCTA	TRCN0000467135	CPA5	940	848	619	676	451	674	757	636	664	570	583	659	571	515	848	833
CCCATTACAGGGTATGAGATTCAT	TRCN0000467136	RIMBP3	1003	864	585	728	870	689	586	617	527	568	545	513	439	602	363	567
AAGATGTGTTGCATGTTATGCTTC	TRCN0000467137	TRIM41	878	570	327	321	644	745	716	644	745	625	602	555	391	587	566	676
TTCGAGCCTGTGGTCAGAATCACT	TRCN0000467138	ETV5	2055	1941	1493	1521	1581	1787	1353	1521	1453	1445	1471	1444	1122	1717	1516	1549
CTGAATGACTCAAGCGAATCGATC	TRCN0000467139	KLHL29	1868	1887	2014	1287	1416	1521	1225	1514	1379	1084	1281	1284	1086	1282	1206	1224
ACATTGCCCCAGTGTCTAGAGCCC	TRCN0000467140	SELPLG	1088	935	820	984	716	827	636	635	790	559	746	542	694	543	521	545
CTTTGTCTTACTAAGTAAGTCCAC	TRCN0000467141	RAD1	1332	1105	1025	942	910	855	1055	1219	1137	1023	1025	963	669	823	854	1003
ACCCTAGGCGTCCCAGGTAAACCC	TRCN0000467142	KCNK4	2347	2133	2144	1863	1736	1636	1438	1548	1660	1849	1353	1679	1312	1376	1515	1473
CTGAGTATGAATGCTAATCGCCCT	TRCN0000467143	NDUFA12	2311	2386	2134	2591	1787	1947	1957	1914	1687	2036	1628	1818	1509	1781	1946	1916
CACAGTGCTGGACCATAGCCAGGA	TRCN0000467144	CHEK2	996	997	664	364	537	632	417	600	605	467	505	579	687	505	546	477
AATAATGTTTAACCGTTACCCGGA	TRCN0000467145	ADCK1	271	186	114	109	197	276	210	207	278	144	229	220	174	251	146	172
TCTTGTTAAGTTATAACTTGTTTC	TRCN0000467146	MAP3K5	251	176	88	86	142	133	212	132	170	128	45	101	106	200	222	208
ATCACCGGTGCAAGCGATCAAGAT	TRCN0000467147	LATS2	669	607	398	404	557	433	584	599	427	514	373	546	420	385	386	344
TTCCATGCTATTCTTCTTCCACAT	TRCN0000467148	TAF8	1392	1191	1111	853	989	912	1370	1113	1105	1051	1011	866	1013	994	985	1081
GTTCAACACCCCCACCGCCAACGT	TRCN0000467149	CSNK1D	389	305	431	238	262	377	268	264	293	277	277	327	265	257	208	364
GCTTCATAGTAAGAAGGTACGTCA	TRCN0000467150	ATP6V0A2	761	663	337	341	700	738	505	612	636	432	661	510	678	434	634	514
GCTGGCTCTAACTAGCCCCAATCA	TRCN0000467151	LRRC25	2035	1704	2116	2256	1497	1237	1028	1258	1162	807	1020	1280	981	1065	1062	889
TTAGCCCTAAGAGTCGGCCAGGAC	TRCN0000467152	C1orf94	2042	1869	1413	1249	1757	1585	1607	1416	1933	1576	1528	1238	1459	1272	1399	1440
GCACGACAGCTACGTCGTTTAACC	TRCN0000467153	ZFC3H1	1591	1545	1418	1368	1231	1456	1117	1012	873	1163	1064	1220	1073	1122	1244	1137
ATCAGTGCCACCCTGGCCTAATTG	TRCN0000467154	ARMC9	1134	943	521	527	807	636	897	743	861	1026	690	650	655	733	567	934
CCCTCTGAGTGTACCATCTCGAAG	TRCN0000467155	RNF8	3074	3324	2555	3033	2773	2306	2276	1889	1889	2114	1941	1880	1768	1658	1880	2171
ACGTAATGGAGAAAGATACAATCC	TRCN0000467156	MLX	5170	4526	4114	4517	3971	3837	3657	3557	4072	4051	3536	3593	2977	3796	3368	3224
AATCGTATCATCACATTTATCATT	TRCN0000467157	AK4	850	682	450	465	901	768	892	736	628	765	705	624	697	838	850	842
GTGTAGGAGTTCGCCGCGGACCGG	TRCN0000467158	ZNF419	1	6	0	0	4	4	1	3	0	9	0	0	4	3	0	3
AGTATACGATAATTTCTCCAAAAA	TRCN0000467159	HIST1H1E	3851	3409	2637	2567	2548	2689	2836	2883	3086	1992	2670	2598	2463	2778	2694	2678
CAGGGACTCGGCCGAGGACCGGCT	TRCN0000467160	KIAA0753	3554	3429	3225	3326	2669	2801	2919	2477	2568	2305	2549	2619	2240	2251	2468	2268
CTCAACGGAAAATATCTGAGTTTC	TRCN0000467161	FRS3	1368	1354	1391	1196	823	762	822	877	871	819	847	786	820	1158	688	957
GTTAGACCGGTCGCTGGTCCGGGT	TRCN0000467162	USP25	148	103	40	45	126	143	50	96	138	46	102	104	44	93	64	178
TCTCTTAGGATATTAATGTATTTT	TRCN0000467163	SPRTN	1316	1116	651	674	900	994	933	1120	936	983	852	772	926	772	824	864
GACTCTCCTCGTACCATCCACGCC	TRCN0000467164	ATP12A	14	5	0	10	0	30	7	0	0	0	8	10	4	0	5	4
ATTGAATTAGGCTGATTTGACTCT	TRCN0000467165	C20orf141	2087	1552	1281	1383	1660	1770	1649	1747	1775	1491	1308	1266	1489	1183	1481	1573
GGCGGGGTGGTGACGGTCGCGTAC	TRCN0000467166	ZSCAN16	2071	2122	1887	2226	1295	1388	1619	1318	1569	1088	1336	1446	1324	1224	1589	1004
CCGATTGATAACTCAGTGGTCTTG	TRCN0000467167	NELFE	156	221	86	84	58	120	59	65	202	168	132	81	105	127	179	78
ATCTCAGAGGACAAAGGGGTCTTC	TRCN0000467168	C11orf42	1460	1087	1023	987	1147	995	1382	1004	1111	986	998	1083	862	849	1174	1154
AAACACACCTATAACCATGTGGCA	TRCN0000467169	GPR3	434	382	246	316	305	385	239	313	309	262	157	384	319	319	371	350
TTCGCAAGACCCAAAATTATTTTG	TRCN0000467170	CDK5R1	588	621	435	545	418	497	429	488	436	328	504	409	322	389	329	441
AATTCCAATACGTCGGGCCACCTA	TRCN0000467171	HORMAD2	479	353	350	252	386	462	448	505	367	401	364	358	366	336	397	296
GCCGGCACTCAGCGGTCTAGCTGC	TRCN0000467172	BLVRA	4039	4002	3622	3830	2765	3010	3121	2901	2966	3095	2428	2438	2623	2750	2468	2860
ACACTATAAGAGCAACATAGCTTC	TRCN0000467173	MMS19	7197	6335	6064	5940	5850	5554	5751	4978	4733	4710	4463	4573	4403	4953	4647	4473
AGGCTCACCGTTGGTGCGTTGACA	TRCN0000467174	ANAPC15	1380	1115	1018	995	1128	769	1000	847	1071	822	600	851	631	875	824	990
GCCATCCTCATTCAGCAAACGTGC	TRCN0000467175	NO_MATCH_175	6443	5493	5198	5454	4339	4711	4334	4731	4708	4299	4028	4070	3929	3811	3631	4162
CCATAAAAAGTCACAGCGCCGACC	TRCN0000467176	SLC37A4	1458	1405	846	762	505	904	545	788	593	415	540	539	523	707	724	440
AGCCATCACGAAAAGCTCGTGACT	TRCN0000467177	IFNW1	2219	1881	732	899	1072	1022	1201	1092	883	803	1090	836	1078	1091	1292	1245
ATGCCTCGGGATGCGGACAGATCC	TRCN0000467178	TTLL10	1180	1004	866	953	844	932	865	845	840	976	881	791	763	860	795	729
CTGATTATCCTAACCGTAGCCACG	TRCN0000467180	MARK4	692	610	679	583	283	405	612	447	344	393	439	454	327	553	485	483
CGAGCTCGCTCGCCCCCGGCTCCG	TRCN0000467181	EGFLAM	353	308	162	158	308	268	332	276	260	221	160	333	318	210	233	186
AGCTGAGAAGCTCAGATATCAATT	TRCN0000467182	FBXL14	1085	1070	599	908	790	785	814	670	590	777	715	511	618	662	815	708
ACACGATCCGCGTCCTTACAATAC	TRCN0000467183	PSTPIP1	584	589	303	330	277	465	385	340	510	457	357	326	357	405	394	324
ACCTATTACAAAGACCAGTAGCTT	TRCN0000467184	ADORA2A	1798	1541	876	1063	1410	1607	1501	1351	1156	1244	1129	1307	1099	1243	1226	1337
CCCCCTTTTATTGTCTATAGACCC	TRCN0000467185	TMEM14A	1226	1102	1146	1063	723	989	961	1039	971	884	1117	848	669	805	814	815
GGTCAAGCTTATCGCCCTTGGGAG	TRCN0000467186	HSD17B10	2693	2585	2331	2299	2019	2165	2303	1899	1736	1815	1347	1584	1761	1367	1810	2055
CAATAAAAAAATAATACGGATCCC	TRCN0000467187	NRP1	781	796	289	569	444	496	478	741	692	717	477	322	425	428	410	432
TTTAGCGAGAGCCCCCGCGACACC	TRCN0000467188	TSC22D4	1060	854	639	685	787	749	692	637	661	661	450	533	473	584	489	514
ATTCTACAGGCGCCATACAAGTTC	TRCN0000467190	RNF114	552	449	324	316	488	631	505	443	407	408	507	311	387	412	512	508
TCGTCTAGCCTGCTTTGTCAACCC	TRCN0000467191	FGFBP2	2102	1875	1765	1780	1332	1391	1806	1436	1447	1290	1330	1575	1196	1338	1296	1684
CTTTAAAATTACTTAGGATCCCGT	TRCN0000467192	SHISA3	1966	1767	1540	1772	1545	1643	1600	1476	1433	1267	1616	1260	1179	1481	1053	1463
CAGAGTACTCCGAGACTACAGGTC	TRCN0000467194	C2orf73	1526	1546	1364	2108	1007	1144	1210	1188	1147	932	1097	1055	974	806	1203	1187
CCGACTGTACATGTTCGCCGCGTG	TRCN0000467195	AP4E1	145	127	138	46	108	219	83	136	129	167	136	36	114	67	44	243
AACCAAGCCCCCATACGACCTATC	TRCN0000467196	SLC4A5	342	236	162	161	256	439	444	282	300	153	115	163	133	201	204	367
TCGCAACTATATGAGTGTACCTCC	TRCN0000467197	BPIFB3	1424	1419	1371	1217	1153	996	1127	828	1210	1072	845	984	682	796	860	710
ACTTGATCTAAGCACTTCTCCGCC	TRCN0000467198	RPP30	1879	1621	1543	1463	1729	1871	1493	1411	1394	1635	1089	1258	1099	1530	1495	1602
GCACACTTCTAGCTTCACCCATGT	TRCN0000467199	NO_MATCH_171	2445	2394	2387	2017	1767	1788	1784	1592	1679	1705	1720	1885	1519	1599	1712	1608
TAGCTATATCGCCTAAGGGGTTCG	TRCN0000467200	PPM1N	1859	1885	2176	1908	1398	1577	1376	1313	1390	1319	1251	1268	1176	1154	1424	1764
ACATTCACGGATTTCTCGACATCA	TRCN0000467201	MAGT1	845	827	535	668	593	576	605	631	675	444	656	569	454	532	621	480
CCCGAATCTTACTTCGGTGAATTA	TRCN0000467202	CSGALNACT1	988	879	728	771	733	638	585	604	775	602	623	545	558	675	534	351
ACGATTAAAGCTCTTAACATGTAT	TRCN0000467203	SLC36A4	315	336	145	356	225	333	270	341	190	265	230	180	275	231	329	158
CCGGTGTTAACATGATCCTAAAGC	TRCN0000467204	WASL	1500	1548	1228	1659	1241	1017	978	1035	1163	863	943	998	801	938	961	1435
CGAGTACCACAATTAACGCCGTCT	TRCN0000467205	TMEM171	4547	5117	4526	4332	2974	2974	3008	3235	3264	3065	2962	2924	3196	2895	2973	2877
GACTGTCGCGAGATGACGCACAAT	TRCN0000467206	SUPV3L1	764	642	341	503	453	659	498	336	529	711	513	489	332	467	400	530
CAATGCACCCAAATGTCCCCAAAT	TRCN0000467207	ZCCHC12	713	822	1024	797	634	313	552	512	502	496	448	796	381	404	379	517
ACCTCCAGTCGTTTCTAGCTACTG	TRCN0000467208	SAV1	1094	833	623	675	795	996	835	735	844	793	669	614	670	608	692	754
ATCGCCCAGGGTACGTTCCTAGCC	TRCN0000467209	CYTH3	1289	1009	830	913	931	831	998	997	1028	856	679	1174	848	723	931	872
TATTTAGCACGCAAGAGCCGGAAC	TRCN0000467210	GABRA5	2263	1902	1511	1446	1547	1476	1860	1634	1703	1566	1323	1335	1141	1391	1666	1550
TCGACAATGATCTCATCATGGCAT	TRCN0000467211	APBB2	3555	3247	2992	3014	2444	2389	2804	2500	2421	2534	2306	2349	2437	2084	2628	2210
TTTCATTTTTATTCTGCGATCTAT	TRCN0000467212	ICK	253	161	110	97	145	263	179	157	194	170	296	148	140	208	214	265
TGGCCGCCCGCGGCTACTTAACTC	TRCN0000467214	EPN3	327	308	219	251	247	159	336	278	239	281	191	143	227	164	199	80
GAGACTAACTGAGTCTGTATGGGC	TRCN0000467215	ADPRH	1749	1536	1222	1098	1286	1472	1240	1329	1106	871	1155	1338	1164	1528	1335	833
TAGCCGTCAGTGGGACTTTTCTTA	TRCN0000467216	CCND1	608	556	416	466	420	349	434	421	351	353	302	476	262	341	372	285
ATGGTAGCGTTTTAACGACATATG	TRCN0000467217	C5orf24	727	580	378	535	579	595	560	528	628	471	368	480	501	467	487	582
GTGTCATGCCCCCCGTTTACCGTT	TRCN0000467218	PPIE	1116	907	692	552	669	982	1013	840	869	848	693	641	712	609	671	770
GTTCACATACATCCATATTGTTCG	TRCN0000467219	ARMCX6	403	339	289	253	360	434	335	306	183	353	234	216	294	174	282	326
ATTTTGTGCCGACTTTTCAACGTC	TRCN0000467220	PPAPDC1B	2447	1722	1325	1258	2225	2158	2521	2115	2068	1908	1883	1959	1698	1884	2307	2075
TTACCGAGATCTCTTTTCATATCT	TRCN0000467221	GSTA2	3172	2688	2368	2715	2451	2431	2306	2069	2158	2478	2257	2225	1642	1775	2195	2269
AGAGGCTATGTACACTGCCGAGAG	TRCN0000467222	BNIP3L	6139	5327	4316	4942	4394	4455	4773	4848	4352	4670	3866	4158	3669	4150	4410	4643
TCCCTGGAGCACACAACACCTAAC	TRCN0000467223	VAMP4	8849	8684	9322	8521	7065	6900	6709	6575	6154	5596	5257	5937	5033	5746	6693	5309
TTCGTTTTAAACCACGATTGTGAA	TRCN0000467225	TTC26	0	0	0	0	0	0	0	5	0	3	0	0	0	0	0	2
GAAGTACTCCAGGATCCCCAGGCT	TRCN0000467226	C2orf83	10169	8717	8542	8432	8393	8365	7116	7388	8108	8021	7188	7089	6217	6680	7521	7520
GGCGCACAGTTTAAACAGAGTGTT	TRCN0000467227	PPP4R1L	357	237	193	265	133	260	222	224	182	174	162	104	235	259	90	255
AACTACCCGAAGAAGGGTCCCAAG	TRCN0000467228	XLOC_000477	1514	1270	1036	1124	1058	1160	1307	1116	1139	1105	946	990	871	935	1031	1287
TTGATTCCCGCAGGTTAACACAGA	TRCN0000467230	Prpf38b	4680	3824	3569	3472	3549	3138	3546	3452	3059	3592	3533	3038	2792	3082	3220	3263
CAGTCAATCTATGAAAGGGAGACG	TRCN0000467231	TRPM1	6970	6826	7543	7426	5410	5248	5416	5724	5067	5209	4909	4929	4386	4884	4967	4855
CCATCTTTAAACGACTAACACCTT	TRCN0000467232	ZNF655	760	619	771	399	595	506	310	408	589	289	531	433	517	245	244	626
TAACACCTGACTCACCTCTCTGGT	TRCN0000467233	Srgap3	1759	1721	1384	1257	1530	1030	1153	1290	1235	1217	988	1125	1204	733	1433	1421
GTACAGAATACCCGCTGTAAGCCT	TRCN0000467234	ECSIT	3942	3412	3760	3562	4525	2824	3223	3307	3077	2612	2637	7057	2751	2789	3349	3041
TTGATGGAGCACTCTTGGTGCAAC	TRCN0000467235	CENPK	1656	1491	1267	1095	1424	1234	1296	1047	1317	1306	1174	1129	844	1129	1146	1060
GCCAAAAGATGGAAACCGGCGGGT	TRCN0000467236	HLA-DRB1	1521	1426	1221	1225	863	1108	918	1091	1065	931	1086	1023	968	1004	959	1138
ATATTAAAATGATTAAATACTATC	TRCN0000467237	LYSMD2	2936	2322	1692	1528	2772	2667	2527	2727	2411	2511	2912	2249	2208	2363	2627	2744
GGAACCGAGTTCATGCCAATAGCC	TRCN0000467238	MAGED2	3281	3108	2938	2844	1833	1949	1983	2274	2249	2460	1811	2304	1781	2059	2131	2261
ATTCAGTTTTGCAGACGGGCGGCA	TRCN0000467239	RAD23B	1372	1018	547	722	1118	1086	1234	1179	902	1094	990	853	822	1018	952	944
CTTTGCCTAATCTACCTGGGAGCG	TRCN0000467240	RAB41	2927	2502	2481	2118	1866	2081	1958	2104	1860	2151	2144	2057	1678	1502	1830	1822
GAATTTTTCCCTAATATCTCTGGG	TRCN0000467241	ORAI1	1678	1441	1006	1017	1332	1705	1544	1311	1507	1176	1228	1311	1174	1371	1165	1385
TGTCGCACCGGAAGCGTACAAGAA	TRCN0000467242	TMEM196	1079	1146	969	1163	704	880	688	937	816	626	676	998	767	605	738	817
AGGGGGGAGTATGCTCTATGCATA	TRCN0000467243	RNF10	509	470	281	336	254	549	408	398	288	482	504	186	295	386	317	242
CGATCCCTGGTATGATTTCTCTGG	TRCN0000467244	MKL2	2115	2470	2228	2277	1656	1987	1364	1652	1457	1335	1333	1636	1212	1788	1260	1497
TGTAACTTAAGACTACCCCTGTGT	TRCN0000467245	LOC642131	311	318	300	206	211	437	286	257	257	282	141	188	161	163	221	256
AAAACCTTTGAGCGGAGCAAATAT	TRCN0000467247	SPTSSA	2385	1688	1541	1452	1842	1964	1892	1860	1803	1700	1548	1770	1370	1730	1675	1960
TACCCGACAGTCGCGCTCAACCGT	TRCN0000467248	TSSK1B	666	681	223	163	490	354	331	344	382	356	344	316	257	376	371	310
TCCTGCAAAAAGTCTCTTCCTGTA	TRCN0000467249	S1PR1	1429	1458	1148	1272	1054	901	1023	877	948	874	1235	899	759	1060	976	1008
ACATCTTCCGGCGTCTCCTCGCAG	TRCN0000467250	CHCHD6	1413	1254	937	907	936	1052	1148	977	995	1305	978	754	686	1153	1010	1055
GGTATTGGATTGTGTTGTTTGGTC	TRCN0000467251	ZNF684	2924	2542	2231	1858	2119	1816	2113	2273	1527	1941	2204	1951	1920	1656	1540	1585
AAAGCGTGTCGACCCCGATTACAG	TRCN0000467253	HENMT1	530	433	353	312	560	387	498	400	443	432	420	352	298	271	351	418
AGGAATAGCGCCAAATCGGCCCCC	TRCN0000467254	APIP	1556	1443	1386	1287	1081	844	1218	1067	1011	1133	1043	1067	966	892	1193	1103
GGCCCACATTTACCTATTGACTTG	TRCN0000467255	EDN3	3567	3560	3125	3431	2155	2211	2576	2636	2066	2324	2324	2438	1999	2339	2387	2091
GCCAGATTTTCCCCACATAAGCAC	TRCN0000467259	CARD11	909	855	717	924	523	691	579	671	557	564	468	529	543	653	639	488
CAGACTTTGACATACCAAACCATC	TRCN0000467260	SULF2	748	683	518	422	580	629	424	424	452	569	351	442	526	468	374	406
GATAACGAAGTGCTTTGCGACCGT	TRCN0000467261	CGB8	3662	3348	2631	2919	3118	2708	2331	2750	3453	2471	2491	2317	1974	2252	2467	2673
ATGAGCCTTATTGGAGGCTGAAAT	TRCN0000467262	LINC00242	1790	1387	1406	1119	1563	1486	1449	1407	1640	1348	1305	1272	1086	1340	1310	1464
GAAGACACTCTCCAACTGCCGTTC	TRCN0000467263	NSUN5	2806	2808	2528	3268	2534	2535	2262	1847	1954	2399	2292	1825	1639	2016	1972	1934
CCGTACCATTAAGGCTAAAAATGA	TRCN0000467264	SLC25A37	2377	2451	2852	2366	2086	1770	1539	2123	1933	1340	1284	1621	1817	1598	1946	1738
AACTCATGCTGGTCAACCACTTAT	TRCN0000467265	PDE6G	1486	1110	953	1009	1115	1061	1480	1056	1054	862	1029	1137	1033	1001	1017	977
TGCGCCGCCTTCAAAGTTGCGGAA	TRCN0000467266	LRFN3	596	568	499	485	438	331	272	295	273	254	337	368	257	338	280	287
GCATAGGTTTGACCGGCAAAGATC	TRCN0000467267	CLN8	2550	2658	2362	2467	2058	1960	1792	2126	1893	2217	1889	1866	1554	1730	1976	2077
CATGATATCTACGTGGCCCTGGTC	TRCN0000467268	TSPAN17	1615	1516	1699	1400	1057	1103	1137	1276	1053	1014	1080	1214	764	1250	1193	804
GATAATGCTGATCCTGAGGGTGGA	TRCN0000467269	LARP4	980	971	736	761	784	967	749	964	839	792	758	757	551	526	713	774
TCGTTTCGCATTCAAGCCGCGTGT	TRCN0000467270	TMPRSS2	1346	1386	1074	947	748	947	844	748	659	659	758	850	712	646	884	738
TTCACCAACTTAGCGATAACATTC	TRCN0000467271	REG3A	2960	2594	2383	2122	1673	2158	2139	1994	1984	2169	1823	2270	1904	2184	1887	1965
TGACCCAGGTAACATAAACGCCTC	TRCN0000467273	NR4A1	1467	1652	1788	1165	788	1011	880	752	1317	804	737	848	1029	1086	807	677
GGGGGAGTGATTCTGGCAACTAAG	TRCN0000467274	FAM65B	1773	1850	1222	963	1103	1207	1049	1042	1192	1177	1095	1302	1005	931	891	1295
CACGCCTGACTCGATTACCTCACA	TRCN0000467275	NO_MATCH_89	3735	3812	3541	3427	2355	2640	2410	2607	2764	2142	2074	2640	2012	2499	2178	2643
ACCTTCAATTATTCTCGGTAAAAT	TRCN0000467276	CA8	1498	1174	1585	1218	1050	1189	1244	1279	1248	1225	1101	1218	1169	989	995	1337
AGGTCTACGGTTGTTGCAACCCAT	TRCN0000467277	LRRC8B	1426	1239	622	717	929	953	951	848	883	849	704	773	702	819	783	676
CTACTACTTTACATTCGACTGCCA	TRCN0000467278	DYRK4	1463	1367	972	1148	812	1031	1204	836	1033	505	733	882	738	916	984	884
TGGACATTTATCAAGAATTAGTAC	TRCN0000467282	KLF6	2990	2875	2974	2996	2292	2477	2041	2127	1875	2423	2096	2283	1733	1942	1985	2172
AGATACACTTTATTAATGCGAATC	TRCN0000467283	SPDEF	1118	893	726	602	805	608	715	859	638	822	715	675	623	841	645	717
CAGCAGTTCGGTCAGAAGCTAACC	TRCN0000467284	RGS4	2675	2852	2897	2589	2130	2330	2104	1918	2255	1803	1816	1707	1644	1994	2150	1514
CGTGAAGCCACTTTAAACCCACAC	TRCN0000467285	SLC52A3	2810	3410	2678	2998	1785	1972	1729	1943	2211	1972	1373	2084	1402	1275	1707	2096
GAACAGGAATGCGAATTAAGGCAG	TRCN0000467286	SDC3	2361	2223	1812	1717	1910	1774	1692	1700	1822	1594	1610	2074	1357	1412	1980	1648
ACCAAATTTTTTACCGGGCTGTTT	TRCN0000467287	MAP4K1	112	100	69	42	34	90	9	36	26	18	87	85	21	8	67	17
CGAATTGCCCCTTACTCTATAGGA	TRCN0000467288	CSNK1G3	1173	1393	995	1259	689	694	751	897	903	1080	928	965	872	886	454	968
TTGGGCCAAGATATCTAAGAACAG	TRCN0000467289	TEAD1	2878	2407	2070	2034	2360	1993	2187	2400	2157	4303	1549	2195	2084	1889	1789	1865
TAGCGAGGCGCACCCTCTACTGAT	TRCN0000467290	BSND	2923	2679	2482	2170	2236	1910	2118	2049	1914	1974	1910	1805	1543	1914	1946	1665
GACAGGGTCCTCATCCTACTGCTT	TRCN0000467291	FAM57A	2474	2417	2365	1869	1834	2187	1856	1923	2003	1846	1448	1470	1490	1539	1988	2029
CCCTATGAAGGCCTGAAGCGGGCA	TRCN0000467292	METTL21A	5791	5997	7577	6348	4116	4234	4610	4295	4480	3708	3942	3743	3692	4050	4096	3311
GAACAAGGCTCTTGCCCGTGGTAT	TRCN0000467293	SNN	3349	3025	2872	2955	2706	2454	2150	2430	2471	2083	2551	1918	1792	1971	2271	1869
ATGCTCACCAGATGCTTGGTCTGG	TRCN0000467294	C1orf101	428	352	245	172	400	471	397	310	314	328	285	232	250	191	269	206
ACCATCATGATTGCCCTGGGATGG	TRCN0000467295	RLIM	2630	2251	1650	1705	1630	1529	1817	2266	1802	1696	1768	1772	1384	1213	1501	1492
AACGATAACCCCCTAGTCTACTTT	TRCN0000467296	MEPCE	3229	2644	2019	2223	2476	2470	2485	2339	2189	1834	1920	2363	2086	2096	2119	1847
TGTATCTAGCGAGGTCCATGAACG	TRCN0000467297	AHNAK	10048	10059	9193	10062	6990	7168	7439	6978	6774	6258	6432	6685	6140	6068	6272	6832
TGACGTCCGTCCCAGACCGTCTGC	TRCN0000467298	GRB7	2077	1981	1435	1439	1454	1452	1459	1636	1102	1357	1282	1375	1173	1263	1235	1376
ATTTACCCCAGACATTCGTTGTGC	TRCN0000467300	BBOX1	48	24	27	11	34	30	19	31	41	57	43	62	21	27	15	60
CACCGTCATCACTCAATCAATTTC	TRCN0000467301	RGSL1	81	58	44	59	85	24	48	49	45	21	21	58	35	70	105	88
AGACATGTGAATTGTTCCCCCCGT	TRCN0000467302	ARHGEF38	4646	4473	3897	4240	3465	3757	3398	3474	3832	3397	2946	3072	2758	2612	3089	3022
CACTCGACAAAGCTGCATTGCTTT	TRCN0000467303	KRTAP19-5	6174	6517	7113	6989	4093	4550	4002	4528	4520	4838	4350	4029	4063	4290	4134	3854
CCATAACCTGAGTTTTTTTGTAAA	TRCN0000467304	CDHR3	2516	2192	1587	1275	1831	1531	1722	1926	1822	1792	1502	1968	1849	1171	1570	1521
AGCCTACGTTTGAAAATACCCGAC	TRCN0000467307	NT5C	420	395	416	587	384	333	282	323	305	316	240	350	250	228	352	306
TAGACCTGTTCCCTTGTCGCGGCA	TRCN0000467308	REEP4	61	60	40	46	9	19	39	36	6	33	15	1	14	35	22	49
TGAACCCCTCATCCAGGGCCATCA	TRCN0000467309	ZNF555	283	278	243	353	196	62	126	123	191	145	338	260	74	99	292	97
ACTAATTTTCTAGTCCGAAAAGTC	TRCN0000467310	LMNB1	1787	1555	892	947	1117	1406	1263	1178	1094	1013	1170	919	1098	970	1113	1128
AAACTTTGATACGATTGTACTTTT	TRCN0000467311	MAPRE2	293	218	102	164	253	195	346	270	267	266	418	197	146	233	181	240
TACAATCAGTACACTTAAGCATCA	TRCN0000467312	C11orf65	958	934	788	827	843	557	805	720	512	485	554	525	546	702	694	900
GGTTCGCGGGTTAAAGGTGATCCG	TRCN0000467313	NRG1	7428	7427	6717	7030	5793	5806	5159	5202	5282	5250	4384	4394	3940	4716	4425	4802
AGTCCTCGTGCTGAATCCCCGTCT	TRCN0000467314	ATP6V0C	840	691	570	623	560	585	610	630	596	443	482	467	539	549	638	535
GACCCCCCTTGGGAATACTATTAT	TRCN0000467315	DKFZP434K028	1478	1340	1241	1593	1236	1125	1156	1171	1095	1078	913	1051	1034	795	1094	1259
TTTGCGCCCGGTCTCGGCCTCAGT	TRCN0000467316	SNX9	578	596	356	445	542	422	592	395	354	406	456	348	451	275	448	436
TACGCATTTGTGCAAATTTACCTG	TRCN0000467317	CNP	2246	2334	1886	1740	1718	1521	1702	1471	1474	1333	1640	1724	1408	1453	1693	1466
ATCAATTTTCAGTCGCCGGCAGGT	TRCN0000467318	Phf10	1202	924	628	567	931	1007	1145	1059	825	823	1164	821	851	903	828	1099
CACTAATCTAATCTTCGCCGCAAA	TRCN0000467319	OR7A17	1595	1521	1476	1320	1047	1349	1300	1200	1644	1027	906	1067	1002	902	1138	1233
TAACGCTCGCTATCCTTGATATCC	TRCN0000467320	FAM20B	1157	908	843	739	678	950	806	780	964	830	730	711	625	675	880	928
TTGGCTGTAACTCGGGGTGTTTGC	TRCN0000467321	WNT9B	169	141	162	78	93	103	163	101	99	108	93	120	100	65	161	62
GTATTCAGCATCTCTCAATGAAGC	TRCN0000467322	STK17B	928	677	705	647	639	706	731	702	668	665	561	673	398	731	760	764
ATTATTATTCCCTTCCAGCCTTAG	TRCN0000467323	CMPK1	998	672	443	892	792	921	716	713	736	779	678	693	540	844	541	707
CACGCCCTACATCCTCGCGTACAT	TRCN0000467324	SNCG	1674	1745	1893	1827	1111	1192	1217	1229	948	969	1046	1440	1053	1035	1107	1123
CTACACTTTGTGTTAATATTTTAA	TRCN0000467326	LY6E	3587	3424	3424	3153	3116	2679	2996	2598	2532	2088	2815	3030	2491	2272	2457	2651
ATAAGTGAACCAGAGCAAGCGTTC	TRCN0000467327	FBXO44	1946	1833	1390	1369	1571	1763	1444	1656	1500	1073	1520	1397	1427	1404	1426	1582
ATTATTCATTACTGCAATCTGCCG	TRCN0000467329	AMIGO1	1236	917	496	500	1014	1163	1102	945	851	1016	898	964	793	775	933	998
AACTCGTTTTTGTACTACGACACG	TRCN0000467330	SNX32	632	498	427	373	558	517	562	496	465	384	511	378	455	349	488	443
ATTAGTGATGACCTCCACCAATAT	TRCN0000467331	C3orf52	2590	1964	2050	1820	2088	2390	2426	2444	2116	1910	1920	1708	1654	1630	2029	1807
CCTTACGGAAGTATAAACTGTTTT	TRCN0000467332	PASD1	889	796	728	412	307	400	542	565	165	437	585	444	380	400	356	340
CTAATTTGCATACTGGAAAGTTTA	TRCN0000467333	SVOP	1318	1325	1050	947	962	1017	1045	1004	955	1052	855	886	814	1012	830	996
TCCACTCCTTAATCAGCTTTAACT	TRCN0000467334	TSPEAR	956	896	1009	941	960	800	604	712	589	650	631	530	495	792	697	689
TAGAACGACTTTGCCCCAGTTTGC	TRCN0000467335	SLC38A2	106	96	43	28	5	104	93	31	24	38	46	95	42	75	12	13
AGGATTCAGGGTCCTTTCTATAGG	TRCN0000467336	FRK	812	696	585	474	519	814	709	642	471	702	586	590	523	619	566	525
CACGTATATACCTACTTTCAATTG	TRCN0000467337	WLS	999	1170	888	944	756	721	769	572	602	969	707	806	613	716	750	724
TCTCACCGGGAGTCGGAGGTTATT	TRCN0000467339	CTNS	2645	2307	2266	2007	1803	1862	2205	2138	1994	1907	1746	1702	1864	1689	1466	1708
TGTTGTAAACCATATGAGTGCAAT	TRCN0000467340	HLA-DPA1	86	103	77	42	129	23	33	86	64	44	14	12	30	15	23	52
ATAAAATCCCCCATTCACTACGTG	TRCN0000467342	CC2D1B	2226	1807	1236	1583	1848	1630	1681	1650	1821	1638	1339	1486	1327	1507	1526	1612
CAACACGAGGCCATACATTGCTTA	TRCN0000467344	PRKAA1	772	801	621	565	492	484	524	550	464	454	456	396	425	602	520	462
CTTTCTCAACCTAGGCCGGTAGAG	TRCN0000467345	CLIP4	436	349	253	158	305	442	289	200	266	351	329	256	304	153	222	189
TCGGTAACGTACCGTACCCTCTAT	TRCN0000467346	LMO2	1698	1556	1630	1349	1252	1105	1160	1116	1097	1258	1430	1074	1019	1215	1004	785
CTTACCCTTGAAAATGTTCACGCA	TRCN0000467347	FAM122C	2732	2704	2476	2594	2091	2279	1824	2101	2035	1985	1818	1990	1889	1868	2136	1849
CCCAAAGGATTCGTGCTTCAACGT	TRCN0000467348	RPSA	852	799	974	787	569	473	522	461	380	847	416	383	360	399	689	363
AAGCTACCCACTACACCAGGGGTA	TRCN0000467349	PIK3R5	104	88	74	67	92	35	92	90	52	99	4	53	54	103	56	173
AATTGCCCACGCCCGCAATCTTAG	TRCN0000467350	PCGF6	3070	2363	1334	1641	2423	2692	2524	2239	2295	1859	2403	2017	1949	1870	2188	2105
TTTTGAAGTCCAGCTAAGCATCCA	TRCN0000467351	PPM1M	2571	2104	1712	1956	2154	2112	2018	2253	2097	1909	1965	1793	1659	1889	1623	1862
TCCCATTAAATCCAGATATGTCTA	TRCN0000467353	E4F1	1062	1113	638	795	760	763	793	612	885	766	771	535	816	525	801	693
TGATTTCAGTCGGTATGGAGCATG	TRCN0000467354	PHF1	1034	1059	811	915	653	523	746	541	731	918	586	701	455	665	625	801
GCCCTATTTTCGAATCGCCCAAAT	TRCN0000467355	PCDHGB1	1285	1259	808	718	977	1158	1120	974	921	1047	929	859	996	755	726	988
ACATGAGGTCCACGCCAACTTGTC	TRCN0000467356	THRAP3	0	0	0	0	0	0	0	0	0	0	0	0	0	0	0	0
CTTGCTCGATTTACATATATTCAT	TRCN0000467357	ANGPTL3	78	48	39	46	24	64	16	56	45	40	6	85	36	9	97	24
GCAACTTTACACCAATTTTGTATC	TRCN0000467358	AGTPBP1	0	0	0	0	0	0	0	0	0	0	0	0	0	0	0	0
GCGGCTCATTGTCAACTTTCAGGT	TRCN0000467359	FOXP4	128	126	62	174	73	153	105	74	112	103	79	26	90	161	99	58
CCAGGCACCAATACCCGTGCTCCA	TRCN0000467360	C1orf111	1551	1561	2201	1572	1129	1034	1128	960	1001	1038	984	1014	1150	911	569	724
GTAATTTTTGTGACGAGATGCGTT	TRCN0000467361	WBP2NL	1515	1245	1065	1062	1193	1452	1192	1197	1278	1077	1068	1197	915	1265	1149	1286
GTACTTACTTAAATACTATTCCTT	TRCN0000467362	ACLY	280	198	171	88	202	236	245	142	167	287	184	224	130	139	247	330
CGCTTAACAAGTTTTGGTGCAGTT	TRCN0000467363	ERCC1	4561	4530	4151	4150	3100	2847	3185	2792	2583	2798	2575	2998	2479	2270	2703	2356
TAAATTGTAGACCCGGCTTTATCA	TRCN0000467364	PTS	3604	3406	3681	3511	2945	2696	2861	2443	2778	2385	2656	2535	2305	2407	2564	2771
GAACATCGGTGATTGGGACGTACA	TRCN0000467365	PNRC2	2118	1948	2086	2564	1789	1725	1621	1440	1487	1533	1614	1600	1276	1463	1418	1391
CCTCACAGTACTTGCCATCCTGAC	TRCN0000467366	RBX1	5609	5558	6162	6551	4304	4277	3954	3707	3781	4081	3321	3795	3630	3748	3227	3698
ACTCGGGGTTTTGCCCGAAGCCTT	TRCN0000467367	PCM1	1276	1236	706	1037	1014	776	1129	893	988	907	586	732	650	669	873	763
AGAAACATGGGCGAGCATGGACCA	TRCN0000467368	NEU1	2253	2089	1412	1596	1561	1608	1956	1938	1448	2250	1555	1535	1383	1549	1410	1159
TGTGCTGAGTTTTTGTGATCCTGG	TRCN0000467369	TMPRSS11E	2833	2896	2145	2200	1956	2087	1955	1888	1875	1994	1740	2042	1714	1586	1866	1674
CTCACTTAAACACATATTGAACCT	TRCN0000467370	XPO5	1019	1102	803	854	907	761	810	857	746	697	569	512	672	653	455	442
CGTGAAGCTTCAAACGTCTTAAGC	TRCN0000467371	UBASH3B	932	1154	745	744	709	739	666	663	710	495	380	664	386	641	666	786
TTCGTTTGGGCTTTCCTCTTGTCT	TRCN0000467372	ACOT13	1485	1244	1122	1293	1200	1067	1210	871	1276	854	1114	1221	1090	1042	1178	1411
ATAACGGGACGGCTTATCCCTGAA	TRCN0000467373	NT5C3A	1150	923	624	779	929	991	964	926	841	769	874	722	2488	921	760	874
CTACCACTCGGCATGCCGGGTATG	TRCN0000467378	SPANXA1	1743	1771	2110	1791	1433	1047	1142	1277	1124	1177	1160	1281	977	999	952	1150
TTAACGGGTTACTCGTGGGGGTTC	TRCN0000467379	FBXO46	62	48	30	41	40	73	47	9	47	42	89	33	58	63	34	63
AGCCAGCAACAATTAACCAACAAT	TRCN0000467380	MCCC2	1261	1198	968	969	773	758	924	767	827	617	579	772	458	884	667	898
CTTTACTACACTGCTCCGGAAGTG	TRCN0000467381	BCS1L	776	821	582	710	798	679	577	603	585	653	696	815	624	541	623	672
CTACTTAACACCAAATGCCTTACG	TRCN0000467382	ZDHHC9	1591	1550	1711	1589	1001	1291	1144	1269	822	1237	1025	1330	982	893	820	1041
CAAGGAGGGGCGCGTAATGTTACA	TRCN0000467384	AIM2	2187	2160	2006	1955	1739	1203	1501	1582	1831	1194	1206	1391	1569	1093	1375	1543
TCGATCCCGAGGGCACGCGACACC	TRCN0000467385	EMG1	925	939	1081	710	711	653	630	664	789	529	692	544	572	494	669	455
CACCTTGCCAGGTGCAGTGAGCAG	TRCN0000467386	IL34	1355	1481	1486	1493	1166	877	924	1006	1083	1069	993	981	882	1000	591	1071
TTTAAGAATTCTATTTCCAAAATG	TRCN0000467387	RNF125	1906	1537	1412	1163	1377	1770	1411	1467	1572	1343	1397	1409	1151	1203	1491	1556
CAGTCTCATTCTCTGGCACTACGG	TRCN0000467389	FAM9B	2342	2284	1757	2216	1674	1843	1640	2135	1984	1598	1624	1937	1517	1698	1600	1553
ACAGGTGTTTTGGCCGACTACTAA	TRCN0000467390	C15orf53	3137	3079	2895	3106	2556	2283	2335	2291	2282	2333	2117	2142	1689	2085	1949	1937
TGGAGACCCCCCCTCATATCGGAA	TRCN0000467391	SLC1A5	1247	1188	1077	1033	751	985	915	916	813	793	816	864	773	813	826	906
CGAGCTTTACGATTCCGACTATTG	TRCN0000467392	PRR30	1287	1246	879	1120	879	699	659	874	906	680	715	827	620	838	878	838
CTCCCACTTTAGCCATCCTACATA	TRCN0000467393	HSD17B4	185	197	184	167	124	214	242	170	108	169	103	163	207	117	105	124
AATGAACCCTGTGGGCATCAACCT	TRCN0000467394	PLTP	488	452	337	269	471	392	469	437	396	386	363	332	396	316	414	398
ATAGAACGTGACCAATCGTTGTTT	TRCN0000467395	PIPOX	1127	882	574	757	1002	879	740	691	860	764	760	724	508	864	657	862
TACCTCCTCCAGGGTCGGTTCAGC	TRCN0000467396	PALM	576	465	419	433	202	429	381	373	263	278	399	271	270	284	292	314
TTTCTTTCTTCATTCCGACATTTT	TRCN0000467397	PCOLCE2	271	238	131	110	270	302	221	223	174	242	268	174	198	197	238	337
TCAGGTGCATTTAGCAAGACACTC	TRCN0000467398	DPM1	2379	2161	2200	1698	1530	1933	2111	1455	1914	1721	1634	1896	1405	1643	1738	1344
TCTATCTCCGTCTGTAGATCTGTC	TRCN0000467399	PIH1D1	954	909	809	579	812	659	795	618	607	658	746	901	514	787	599	941
AACCTTGCGGGTGACGCCCTCTAA	TRCN0000467400	PDAP1	1071	784	524	489	914	769	881	734	721	696	617	671	736	697	742	819
ATTCAGTCAAGCCTAAACTATCTA	TRCN0000467401	CDK18	250	183	172	198	165	134	184	190	173	269	232	76	101	123	119	199
TCAGAGCAATATCCCATAATCAGT	TRCN0000467402	RUVBL1	1968	2050	1592	1909	1807	1641	1659	1854	1491	1579	1510	1277	1276	1300	1947	1468
TGCAAATTCTCGGGTGTGTTTTAA	TRCN0000467403	PLIN3	1097	1055	1371	910	879	669	685	677	394	688	694	657	638	716	567	423
TGCCATGCGGCTGGGATGGCTATC	TRCN0000467404	STRAP	2319	2057	1742	1860	1506	1541	1457	1546	1577	1454	1383	1798	1457	1328	1478	1404
GCGTACAAATGTAGATCTTTTTCC	TRCN0000467405	CDKL4	820	885	789	660	794	740	930	530	753	675	561	699	531	708	620	801
AGATGGACTTCCAACCATTGGCCG	TRCN0000467406	NO_MATCH_49	888	885	901	946	837	563	658	706	527	492	605	643	616	518	658	738
GTCATATTTAACTATCTCAGGAAC	TRCN0000467407	C8A	1138	1034	709	429	750	903	953	981	688	843	728	880	750	648	854	882
TGTCAGCAGAATTGCACCCACGAG	TRCN0000467408	YIPF7	3246	3222	4099	3539	2350	2130	2395	2235	2057	2364	2115	2268	2001	1725	1929	2122
TACAATGTACCATGTCAAGCCAAT	TRCN0000467409	POGLUT1	1472	1585	1435	1490	1024	966	1080	1247	1146	1206	937	1413	1006	1181	1185	1183
CGGTCTACGAGCTAAAAATAACAT	TRCN0000467410	LMO2	266	314	293	206	227	206	174	307	249	148	72	66	182	230	242	171
ACCTCAGCCTCCAAATCACGACAT	TRCN0000467411	ZBTB49	4338	3913	4072	3673	3070	3181	3177	3344	3130	3158	2883	3015	2887	2445	2819	3093
CATAATCATGTCTCCCTTCAGCCG	TRCN0000467412	EEF1D	567	469	287	219	289	383	267	372	344	238	259	299	273	247	163	410
AACTTTTCCTCGATACTAAAAATC	TRCN0000467414	TSG101	40	20	36	22	55	29	38	26	54	29	11	28	18	56	10	3
TCGGCGCAGACCGAAAAATCTGCA	TRCN0000467415	PCYT2	56	35	25	34	94	25	7	24	75	0	19	11	6	33	52	52
TGAACAATCTGTCTGGCTTTCACA	TRCN0000467416	STAU2	95	109	43	130	49	70	101	85	76	56	30	85	137	115	112	27
CGTAGTAACGCTTTCGGATACGAT	TRCN0000467417	NAMPT	493	472	227	369	285	226	499	374	349	269	301	328	286	206	335	460
AATCTCTAACTGCCTTATGGTTAG	TRCN0000467418	ZSCAN2	1353	957	771	706	1001	1063	1201	1071	1059	1122	921	1042	764	1174	1001	1084
ATAACCAAGTTATGGAAACAGGCC	TRCN0000467420	CPSF4	2733	2289	2067	2071	1778	2183	2200	2176	2052	2016	1830	1667	1601	2204	2176	2005
CTATCCCGCCAGCTTGCGTGCTTA	TRCN0000467421	YARS	24	44	123	35	15	0	2	29	32	41	84	4	22	95	13	20
TCCTTTCTTTCACTGACCGCTGCG	TRCN0000467422	COPS6	1170	1014	668	934	825	831	789	871	974	1107	688	700	544	724	744	653
TCCGACACATCAACACTCGTCCTC	TRCN0000467423	AKTIP	1731	1676	1931	1669	1075	1233	1362	1211	1192	1084	946	1384	967	1006	967	1143
CGCATGCCTGCGATCATAACATCA	TRCN0000467425	NO_MATCH_130	885	899	663	982	558	526	463	648	567	507	540	599	365	630	567	558
TACATCCCGGTGGAATTAGATAGG	TRCN0000467426	LIME1	4950	5282	4433	4749	3904	3938	3564	3478	2921	3478	3288	3554	2696	3106	3134	3296
CCTTCTTCGGGGACGGAAGTTACA	TRCN0000467427	MAX	2092	2172	1878	2146	1465	1508	1418	1607	1673	1324	1491	1396	1168	1468	1569	1602
ACCCGCCTCTGCCGCGGTAATACA	TRCN0000467428	TXNL4A	1695	1450	1684	1479	1192	1232	1164	1111	1488	1245	1111	855	935	1036	1044	937
AATGTCTTGTTCAGAGGGACGTGC	TRCN0000467429	FGF17	941	689	581	529	965	668	750	780	794	633	731	670	662	593	792	552
CCATCGAACTTAGCCTGAATTGTA	TRCN0000467430	CDHR4	3956	3828	3902	3557	2690	2854	2757	2657	2468	2624	2842	2757	2275	2437	2567	2287
TCCCGCCCTTTGAACTGACGTCCA	TRCN0000467432	MCAM	796	804	474	590	449	626	817	550	553	565	499	561	427	512	466	602
GCTCCTGATTCGTCGTGAGTGGCC	TRCN0000467433	PSMB9	4396	4019	3887	3728	3575	3075	2902	3006	3375	3231	3114	3226	2622	3022	3003	3115
CTCTATCCAATTCTCGAACTCACC	TRCN0000467434	ZBTB44	1942	1795	1873	2297	1438	1075	1406	1432	1253	1556	1498	1740	1129	1444	1373	1166
GAACTTAAGGTCCAATAAACACGT	TRCN0000467435	FAAH2	457	446	289	234	270	295	302	304	481	330	307	231	367	288	329	234
TGGATCCTATGCCTCATTGTTTAG	TRCN0000467436	TBC1D3H	3012	3228	2900	2584	2138	2036	2408	2157	1849	1986	1646	2182	1981	1754	2029	2176
TATATACACCAGTCCAATCCGGTT	TRCN0000467437	DDX55	2067	1758	1743	1336	1874	1352	1861	1606	1555	1432	1494	1310	1399	1621	1013	1376
CTCGGGGCGCTAGTGCCGCCAATA	TRCN0000467438	ST8SIA1	1558	1530	1318	1639	963	1219	965	1422	873	1024	1106	1067	972	1014	1148	1174
CGCAATAACCGCTACCACTGAGTG	TRCN0000467439	TSHB	189	311	169	210	103	92	162	132	162	92	106	104	173	82	124	144
ATCGAGGACATGAGCCTGCAAAAC	TRCN0000467440	NO_MATCH_70	757	677	445	392	684	684	652	497	545	530	468	478	496	651	524	522
ATGAAAATTGTCTACATCACGGCC	TRCN0000467441	ZCCHC14	443	411	287	407	490	377	301	308	449	407	394	172	235	278	199	300
TAAGCTGCTGAGACCTCGGGTCCT	TRCN0000467442	SNHG7	7389	6652	6354	6703	5650	5091	5201	5401	5116	5194	5083	4635	4452	4710	4437	4965
CTTTCTTCACCATTTACAATCGGG	TRCN0000467443	KLHDC4	440	364	253	297	237	431	445	393	351	382	384	271	220	322	357	428
TATCCGTAATCCGGGTCCGTCCGA	TRCN0000467444	ACTRT1	1299	1217	1096	1185	856	1059	825	1087	1062	771	842	1124	842	862	1009	674
ACCTTCTTGAACCCCGTGAGATGC	TRCN0000467445	HSD3B1	1641	1327	1040	1103	1073	1418	1174	1200	1160	1058	912	1065	861	972	1043	1028
CCTTGCATATCCAATTGTCTATAA	TRCN0000467446	NO_MATCH_123	2338	2274	2041	2196	2025	1503	2583	1692	1741	1531	1682	1671	1376	1210	1538	1810
[truncated: 15,256 more rows]

## Sheet: OVSAHO
Construct Barcode	Construct IDs	Gene symbol	OVSAHO Rep A ETP	OVSAHO Rep B ETP	OVSAHO Rep A DMSO	OVSAHO Rep B DMSO	OVSAHO Rep A Cisplatin	OVSAHO Rep B Cisplatin	OVSAHO Rep C Cisplatin	OVSAHO Rep D Cisplatin	OVSAHO Rep A Paclitaxel	OVSAHO Rep B Paclitaxel	OVSAHO Rep C Paclitaxel	OVSAHO Rep D Paclitaxel	OVSAHO Rep A Cis/Pac	OVSAHO Rep B Cis/Pac	OVSAHO Rep C Cis/Pac	OVSAHO Rep D Cis/Pac
GACGAATCAGGCCCTCGAACGTCA	TRCN0000465206	ZDHHC11	736	604	528	639	378	230	285	230	140	285	95	128	72	260	56	67
GTTTCATACTGTAAGCTGGCCCCG	TRCN0000465207	LMOD1	578	390	372	433	291	226	234	207	121	191	420	132	124	135	263	149
CCAAGAGATCCAATCTGACACCAC	TRCN0000465209	PFKFB1	1827	1480	1254	1800	426	444	283	327	558	208	381	405	101	108	269	402
GTAGGGTCACACACTAGCGGCTCG	TRCN0000465210	NKAIN4	4072	3554	3071	3201	1166	1497	1463	1699	579	1054	987	946	285	410	816	1069
CTCCTTCAACCCACCTAAAAGTCG	TRCN0000465211	MRPS18A	1737	1649	1265	1595	695	439	416	502	360	221	567	350	121	190	448	179
CTCTTTTCGCGTAAAATAGAAACC	TRCN0000465212	TICAM1	2575	2127	2539	2124	789	955	789	989	503	427	727	617	441	221	387	133
TTCGTACTCCGGTTCCTGTGCTTC	TRCN0000465213	RHOG	4249	3417	3713	3413	1458	1449	1456	1305	1084	1225	1064	1208	401	478	1449	745
TTTTAGCCTGGCGAAAACTGCTGC	TRCN0000465214	TRIT1	1799	1313	1494	1561	812	879	734	596	310	414	509	622	387	314	514	465
TTCATTACCATAACTCGGTGGCCA	TRCN0000465215	CCDC114	1577	1061	956	1082	592	375	571	543	721	340	184	346	208	291	174	309
TTTGTAGACCATAAGGTCTAAGTT	TRCN0000465216	HAGHL	1025	748	689	827	288	277	217	315	172	200	347	218	63	61	128	215
CACATGGCTGGCATCATGTCGTCG	TRCN0000465217	NABP2	2402	2222	2007	1976	749	626	509	487	477	683	231	385	136	165	211	259
TGAGATCCACAGATCATGAGACCC	TRCN0000465218	TTC23L	3029	2661	2078	2605	1192	812	921	805	350	671	785	563	182	162	203	187
TCATACTGACGGTTCCCCACTCGG	TRCN0000465219	C3orf49	7422	6372	6044	5668	2471	2572	2136	2434	2852	2178	2237	2219	625	864	1115	906
ATAAAGCACCCGCTCCGACAGGGA	TRCN0000465220	CELF6	803	665	473	587	288	396	274	259	203	182	140	181	145	76	210	32
ACGCATCCCATACATCCGCCCGGC	TRCN0000465222	PGAP3	984	871	691	811	383	202	349	450	272	124	209	152	158	137	357	201
GAATTTTCGTTAAGGGGTCCCCTT	TRCN0000465224	HSD17B3	845	635	859	629	366	416	389	399	239	283	389	360	77	278	198	602
GTCGCAGCGTATTGCCTGGATTGT	TRCN0000465225	ANLN	2278	1701	1702	1565	744	706	352	554	782	591	590	738	18	219	214	136
GGCGTAGGCCCCCGCTTTAAAGTG	TRCN0000465226	C5orf46	2495	2206	1937	1788	978	712	683	666	389	586	802	496	126	495	472	377
TATGGCCAGAGTCTATGCAAGGAA	TRCN0000465229	FAM217A	3111	2360	2321	2556	891	1177	865	938	429	599	945	732	164	177	404	513
ATGACCTGTCCGCCTTCAGTTGTT	TRCN0000465230	KCTD1	1883	1455	1597	1465	633	622	775	667	560	719	505	515	132	438	530	473
TTTGATACAAACCTCAAATCAGCC	TRCN0000465231	CDK17	583	418	487	421	141	160	180	75	136	76	99	180	34	5	214	161
CTCGCCGGGAATAAGATTTCCTCC	TRCN0000465232	ODF2	0	0	0	0	0	0	0	0	0	0	0	0	0	0	0	0
TCGCGGCCTCATCCCCCGAATAAA	TRCN0000465233	ATOX1	5070	4594	4898	4341	1924	1390	1611	1439	1194	1452	1181	1623	289	680	719	746
CATACCCCGGGCCCCCAGCACACC	TRCN0000465234	ZBTB24	3288	3136	2294	2908	1004	859	781	1179	493	692	923	755	312	267	365	384
CGGCGTACCTGTGTTTTGATTGAG	TRCN0000465236	DPH3	6453	6176	5080	5171	2130	1412	1407	1606	1214	1139	1302	1126	149	426	1001	663
AATGCATAAGCAGAACTCAGAGTC	TRCN0000465237	LILRA4	879	624	664	732	388	435	257	429	283	241	165	137	111	71	178	247
CGGCAGATCCCCCCACGAACCTTC	TRCN0000465238	EIF4A2	4114	3632	3246	3224	1004	1168	841	1337	471	1053	441	711	304	593	308	336
CTTAGCCTAGCTGATTATTTGTTA	TRCN0000465239	CELF5	1162	891	711	664	427	369	246	313	85	427	231	314	70	270	27	29
ATCCTCCAGCGTATTCTTCTACCC	TRCN0000465240	C11orf73	326	267	256	201	154	71	66	142	187	59	51	75	0	38	105	107
CCTATAATATTCCAAGTGTCTTTA	TRCN0000465241	HAGHL	2879	2080	2345	2336	893	818	666	672	442	210	558	803	148	256	452	580
AACCCCGAAGTTTGTATTGGCTTT	TRCN0000465242	SIRPA	641	369	371	332	205	126	132	303	198	159	132	84	113	61	22	41
CTTGCTTCCATTTGGCCACTCGGC	TRCN0000465243	ZMAT4	6962	6095	5693	5818	2585	2668	2206	2428	1774	1535	2216	1936	396	1024	1046	792
TGGCACCTCTATTGTTGAAATTCC	TRCN0000465244	NCOA4	2682	2091	2097	2458	723	994	679	1171	454	476	317	223	104	42	102	675
CACGAATGCACACACAACGACCCG	TRCN0000465245	SP2	7384	7439	5759	6735	2226	2472	1889	2333	1796	1717	1492	1529	402	570	1401	1192
CTAGCATGTCGTGCTTTATCCATG	TRCN0000465246	MAPKAPK5	985	759	467	521	398	197	165	191	199	258	109	447	43	200	186	81
AGGCCGCTTCAGATCCCCCCAATG	TRCN0000465247	ACPP	1974	1561	1437	1696	688	655	590	756	484	438	386	161	254	275	199	546
CTGCCAGGTTTGACATAATTAATT	TRCN0000465248	SEC61A2	317	213	136	145	60	59	14	30	82	23	253	89	0	36	0	17
CATGAGTTGCAACCCAAACGAATT	TRCN0000465249	DSCR9	5418	5120	4493	4959	1548	1561	1415	1693	1104	886	1987	1326	396	515	1051	750
TATTCTCTTCAGGCCTAAATGACA	TRCN0000465250	NO_MATCH_238	843	651	471	416	205	137	237	223	142	182	65	85	48	33	309	144
ACATGAAGGACGGCGCTCCTATCG	TRCN0000465251	XLOC_l2_009500	3659	3084	3264	3241	1136	1286	972	1074	1125	1099	680	918	279	294	575	592
ATTATGAATCCCTAAAAGGTGACA	TRCN0000465252	TMED5	3143	2262	2205	2512	1761	1418	1467	1418	1468	1327	1414	1295	314	416	815	855
CTCCACCCCGAGGCCGGGTTTTAG	TRCN0000465253	MYO1C	725	486	441	345	373	136	209	125	48	26	48	25	15	68	54	1
CACGGGTCACACGGCCGTGAAAAT	TRCN0000465254	NO_MATCH_91	9388	9192	8235	8166	3046	2931	2225	2372	1636	2368	1762	1338	800	1556	1528	1687
GTCACGATCCTCAATATGTACTGG	TRCN0000465255	GJA3	1529	1083	942	1116	409	439	366	436	434	648	282	293	75	118	222	25
TGGGTTGCTTGTCCAAACATGATT	TRCN0000465256	MPG	964	850	746	831	307	433	378	344	101	150	107	384	73	112	85	254
CCAGGCGTACTCATATGTTAAATG	TRCN0000465257	RHNO1	16662	16343	11715	11736	2170	2054	1852	2279	3819	3977	3567	2806	825	1569	1734	1264
CTAGCTAATTCGCGGACTACCATC	TRCN0000465258	TMED10	9839	8986	8005	7748	3472	3524	2823	3607	2300	1920	2016	2558	870	1229	1923	1853
CCGTCCAGCCGGTATACATTTAAA	TRCN0000465260	CLDN10	2608	2199	2141	2216	1036	754	640	966	647	457	378	467	104	224	213	336
CCCGGCCCACGTAACTTCTTTGTG	TRCN0000465261	SLC47A1	3460	3428	2491	3075	1395	1176	828	1075	1062	508	652	302	207	260	399	280
GATGGAACCCTTTCTCTATATGGT	TRCN0000465262	INTS7	176	129	168	216	54	85	27	137	0	40	14	17	1	316	4	29
AGGAATGTTACTACTGCAGGTCGC	TRCN0000465263	SNX24	7928	6886	7099	7791	3488	2385	2503	2893	1943	1750	1967	2073	958	1064	1615	1102
TCGCCCCGCTTATTGGGACAGCGC	TRCN0000465265	PPP1R8	2295	2053	1609	1846	681	629	590	468	359	689	452	764	124	346	610	424
CCGGTTTATGTGTTTCTCGGTTTC	TRCN0000465266	BNIP1	3296	3023	3050	2707	915	1043	779	915	848	487	962	704	160	519	339	437
TGCACAATCACATTTAATCCTCGT	TRCN0000465267	GCLM	5221	4780	4256	4563	1432	1279	1395	1404	754	1070	942	1284	418	774	552	405
CTATTTCCCGGATACTTTTTCGAA	TRCN0000465268	NUP210P1	3043	2779	2689	2639	1122	1111	828	1233	613	836	622	1153	182	440	630	500
GTAGATCGGTAGTCGGGCTAACAC	TRCN0000465269	OTX1	1977	1646	1018	837	295	415	242	364	733	860	530	447	198	491	497	530
CATAATTAAGGTCCATATACTGTT	TRCN0000465270	GRIA1	1642	1291	1582	1470	487	407	405	345	466	320	1144	208	96	109	296	551
GACACAACAGCATGCGGAGCAAAC	TRCN0000465271	AKR7A3	205	275	129	143	51	87	66	78	38	0	0	11	12	31	0	0
TAAGAAGCCTATATGGTCTCCTCT	TRCN0000465272	CD7	5326	4566	6396	7502	1480	1093	1109	1109	989	1967	920	763	343	419	695	360
ACGGAGATAGTGCAGGTACTCAAA	TRCN0000465273	XLOC_007668	3316	3093	2874	2985	1326	1016	1241	1119	1353	895	815	712	352	630	599	640
AATTCTCGGGCCTTAAGCACTAAC	TRCN0000465274	TUBA1C	2063	1308	1312	1572	800	967	871	795	468	1192	862	568	158	237	401	550
CTGGCGAGGCTTCTGCTGCCTTGG	TRCN0000465275	MAPKAP1	4532	3794	3468	3824	1326	1137	1351	1245	972	531	1088	2601	195	878	587	363
GATCAGAGAATTTTGGATAAAAAA	TRCN0000465276	GALK1	924	606	1114	600	360	328	289	282	216	228	326	301	38	122	216	190
CATCTCTTCCAATATTACACACAT	TRCN0000465277	DYNLL1	11209	9954	9431	10045	4114	4063	2800	4166	2975	2866	2825	3554	947	1273	2374	1926
CAGCACTGCACGGCCGCGGCCATT	TRCN0000465278	HLA-DPB1	2279	2007	1617	1765	740	666	561	566	342	571	356	332	54	175	449	332
CAGTTCAGCTACACACAGTAATTT	TRCN0000465280	AAMDC	633	578	376	471	86	185	149	135	113	177	205	1	2	20	125	19
GCCATTATGCCAACTTATAGTTTG	TRCN0000465281	HOMEZ	5684	4947	5143	4791	1909	1807	1709	2222	1033	1431	1092	1692	268	854	1294	1170
TTCCCAGCGCTGCTCTCCTCGTAG	TRCN0000465282	MSMO1	1486	1169	1049	1011	547	483	357	389	257	297	178	508	82	217	307	296
CGGCTGAAAAAAAGTGGGTGCGAG	TRCN0000465283	ATP6V0C	8505	8680	6631	6861	2492	2678	1765	2873	1484	1303	1358	1976	599	858	1121	914
TGTTACAAGAGCCCCTCTGACCCG	TRCN0000465284	MIF4GD	3071	2523	2791	2982	1028	1042	681	1210	606	470	655	459	61	432	808	344
ATGAAGCAAAAACATACAATAAAT	TRCN0000465286	TCP10L2	552	406	404	386	277	116	283	174	104	221	286	184	105	34	121	414
CCCACCGCCAACCTTGGGCGTTCT	TRCN0000465287	RECK	2923	2610	2188	1888	948	1190	691	815	540	502	475	551	132	316	229	511
TCGGGGTTTTAGCGGAATGCCGCG	TRCN0000465288	HHIPL2	1924	1469	1531	1743	535	649	473	472	546	279	310	458	62	289	306	278
CATCACCGGTGACCCACTTACAAA	TRCN0000465289	KRT19	2668	2394	1821	2143	951	574	498	834	291	899	475	495	195	271	352	355
CTCATCTTCGCTGTGGTCCTGTTG	TRCN0000465290	KRCC1	4050	3656	2936	2960	1363	966	1041	863	916	910	941	1142	480	263	760	681
TGGTCACCCCCCTTCGGCACCTGG	TRCN0000465291	CALM2	2532	2397	2218	2097	1060	814	617	860	940	344	469	821	218	402	550	234
CTTGTGTCCGAAAAACGAACGGCA	TRCN0000465292	SLC25A48	3076	2675	2448	2461	967	795	969	902	591	655	429	730	291	239	393	248
CCTCGATACTTAAATCTGTCCCAA	TRCN0000465293	C2orf88	5762	5239	4658	4904	1941	1777	1493	2015	1256	1390	1114	1333	458	371	680	856
CCCGTGTGTCGTACAAGTTACCCT	TRCN0000465294	MPP1	922	814	698	691	307	347	229	249	173	161	169	147	0	93	56	36
CAGCAGTATATACTTAGGCTTGGT	TRCN0000465295	OTOA	44	31	30	17	11	0	30	0	0	0	0	0	49	0	0	0
CAAAAGTAGTTTCGTAATGAATAT	TRCN0000465297	C1orf210	5866	5118	5134	4202	2018	1704	1371	1741	1557	1266	1533	1173	718	284	809	986
ACAAGTGTAGACGTAAATCTCAAT	TRCN0000465298	FOXR2	3155	2692	953	1218	331	333	392	171	217	220	258	453	55	153	493	81
CCTTACTATAAAGAACGGAATGAC	TRCN0000465299	PPP2R3C	1565	1231	1125	1171	504	389	403	314	73	378	125	333	174	237	265	232
ACAAGGGACTACCACAAAACGTCA	TRCN0000465301	LCMT1	1834	1779	1605	1777	535	636	315	542	338	329	265	277	63	320	406	221
AGCGCAAGTGCCCGGTGGGACTGC	TRCN0000465302	ASB9	7433	6219	5747	5649	2086	2245	1579	2043	1974	1341	1845	1433	901	932	902	844
GCTGCAATGAATCTATTGGTGTCC	TRCN0000465303	MGC34796	7228	6701	6494	6584	2322	2146	1799	2561	1787	1557	1815	1533	488	992	775	1318
AATTAATGTAGTTTTCACTTTCTC	TRCN0000465304	RRAGC	1439	787	1259	1239	703	765	612	681	556	629	541	332	187	413	397	546
AACGTATAACAGACTGGCGGCGAA	TRCN0000465305	PUS7L	273	196	198	286	134	93	101	125	21	93	40	150	19	56	16	1
TCCGCGTCGTTCTCTCACTGACAT	TRCN0000465306	SPATC1L	1511	1212	1102	904	434	501	378	525	194	392	292	139	256	43	119	232
CCGACAAATGACTTCGTTAGGTGT	TRCN0000465307	NUDT4	4215	3899	3844	3761	1032	808	844	784	629	975	1139	1893	238	376	300	405
GAGCCAATAGGTTGGGCTGGTAGC	TRCN0000465308	PCBD2	4967	4393	4384	4231	1746	1807	1555	1927	1420	1119	1155	1262	468	876	900	932
ATGAAACTCTTAGAACAAGTGTAC	TRCN0000465309	ADAMTSL1	1273	924	853	1007	447	424	533	493	309	87	431	316	225	82	232	163
GCACACGTCCTCGGGAGCTTGCGT	TRCN0000465310	FEZ1	2366	2046	1542	1689	763	842	618	792	582	793	419	399	222	236	277	168
GCCAACATGTGCCCTCTAACCCGT	TRCN0000465311	ENOX2	3450	3189	2229	2970	976	1251	1280	927	890	1232	709	661	415	153	881	894
ACGATTGTTGGAAAAATCTGAGGT	TRCN0000465312	PAM16	5309	4442	4358	4406	2368	1845	1529	1755	1176	832	1305	848	309	1081	816	714
GCCTACCTGTGCTGAACTGAAAGG	TRCN0000465313	THSD4	1991	1681	1577	1549	740	547	651	413	503	246	285	533	198	82	357	454
AGCCAGTACTCTATTCCGAAGGCA	TRCN0000465314	XLOC_l2_011027	3906	3282	3663	3492	1512	1297	995	1423	649	836	672	763	320	771	516	556
ATCCGACCTACTTATATGGAAAGC	TRCN0000465315	NPRL3	1272	875	1155	1011	514	377	378	422	294	417	342	577	132	148	55	34
CTTTACACTATGACCCAGCCACCA	TRCN0000465316	GPATCH2	1346	1013	1174	1148	497	470	538	221	384	269	392	186	280	191	86	261
TACGGATACCTTGCGCACCCCACG	TRCN0000465317	DGCR2	2774	2186	1909	2036	1213	1086	1140	971	334	677	620	774	202	226	449	275
TAAAACCAATTAGCCTCCCGTGAG	TRCN0000465318	FGFRL1	2005	1590	754	1090	315	471	582	662	383	224	309	572	131	179	568	221
GGACCGAGACGTCTTAACCAATAT	TRCN0000465319	SMPDL3A	7012	5772	5643	5429	2149	2741	1716	2516	2143	1683	1265	1818	340	243	998	1450
TCTATGAGACGTCATCGCGGCCTG	TRCN0000465320	APEX1	4062	3328	3040	3047	1313	1527	1232	1288	1004	1205	1426	1144	458	325	792	516
ACTGATACGCAAATTACATGTGGA	TRCN0000465321	LIPF	2129	1672	1602	1851	919	1025	822	569	460	874	629	631	408	156	252	229
CTCTGAGACGCTGCAATCGACGAT	TRCN0000465322	TMEM35	5846	5225	2504	2681	1488	1166	1457	1457	1292	1753	1498	1282	428	819	1570	1006
CACTGGCTCCTTCTACCGCATGGG	TRCN0000465323	NAP1L1	2077	1777	1944	1506	642	545	615	566	286	370	375	180	235	198	337	273
TTTCGGCACTACCTGGTCAGCATA	TRCN0000465325	VAPB	4435	3454	3389	3488	2209	1740	1350	2167	1374	1417	1734	1032	399	917	938	649
GCCTATTAACACACTAGCACTATA	TRCN0000465326	HSPB8	1071	901	952	639	269	257	413	484	179	305	165	459	38	410	235	5
TATGCTCCCACTTTCACTCCAGTA	TRCN0000465327	CNPPD1	2275	1688	1610	1393	646	498	549	914	1019	473	664	272	70	261	360	249
CGGGGACCCTCTCATCGACTCACT	TRCN0000465328	FCER1G	6973	6899	6471	5574	2263	2203	1656	1906	1557	1326	1628	1202	508	504	662	839
TACTTCCACCACCCCACACTTTTC	TRCN0000465329	KLHDC3	7901	6895	6828	7303	3070	2829	2650	2966	1861	2563	1714	1884	693	836	1754	867
CGATGGGTATCCCTGACTGTTAGA	TRCN0000465330	EAF1	4332	4554	3644	3208	1295	1312	1304	1537	1067	1232	999	488	186	449	349	644
AAGGGCAGGACCAAACTTTCATAA	TRCN0000465331	FAIM	17	5	5	5	1	2	2	3	2	8	2	3	7	1	2	0
ATTGTATTCATGGAATAGACGTCA	TRCN0000465332	CAMKK1	549	349	314	485	204	205	150	141	176	108	125	397	18	141	16	50
GGTATGAGCGCGGTGGTCAGGCCT	TRCN0000465333	MTERF1	3872	3339	2958	3174	1105	922	1138	1108	1034	827	1022	1049	336	235	618	452
ACGTCGTCGTCGGAAGCTCCGACC	TRCN0000465334	S100A16	1047	795	719	781	358	261	333	456	244	204	262	214	79	69	141	219
ACTGCCCCGGTTCACTACGAAAGA	TRCN0000465336	FAM177A1	6639	5418	4957	5078	2964	2294	1811	2356	1889	1444	1707	1846	651	846	1335	770
GTCAAATGTCTTGGATAACAATGT	TRCN0000465337	CENPA	6991	5945	5172	5530	2700	2319	2335	2584	1943	1742	1525	2368	821	1076	1377	1749
GATCTCGCCGAGCCAAACTTGCCT	TRCN0000465338	MSI2	472	374	242	356	274	198	283	197	94	152	108	189	0	62	102	31
GCAAGTGGATTTAGGATTTTGTCT	TRCN0000465339	RPL34	1871	1537	1344	1222	685	569	624	555	450	126	291	355	57	74	519	466
AACGATCCGCACGGGGCTGGTTCT	TRCN0000465340	P2RX5	418	332	283	347	184	234	186	158	202	156	71	166	39	92	19	1
TGGATACTAGCATGCCCCTATGTG	TRCN0000465341	RBMX	3279	2836	2546	1831	802	691	662	1195	495	640	509	810	436	375	677	455
CTCCTTCTTTCGTAAAACACAACA	TRCN0000465342	JAK3	447	330	345	292	152	77	193	187	122	209	111	17	39	2	2	121
GCCTTGGGAGACATTCGGCGACTC	TRCN0000465344	HN1	4577	4096	3682	3559	1742	1621	1653	1819	728	1415	1234	1617	415	658	537	816
ACAAAGGCTTGAAGTAACCCCAAC	TRCN0000465345	TEKT4	1833	1401	1340	1454	920	499	557	683	307	565	234	492	21	132	110	328
GAGCAGATTCTGTGTGGGACTGTG	TRCN0000465347	NAA10	3533	3254	3798	3118	1222	1384	1367	1343	857	1305	1189	1675	399	771	644	644
TAGGGTCCGCGCCGTGCGTGGTAC	TRCN0000465348	TMCC2	2006	1642	1685	1484	686	728	681	799	577	332	584	591	192	197	167	289
TCTAAAATACATGATCTGAAATTC	TRCN0000465350	ANGPTL4	3114	2411	2671	2417	1066	851	879	1285	541	520	777	599	69	417	627	615
GCGCTCTGATTACTGATGGCAGGT	TRCN0000465351	YIPF5	77	47	21	31	19	7	0	0	0	0	0	0	0	27	80	2
GATGGCAATATAAGTGATGTTCTC	TRCN0000465352	GTF2IRD2B	43	30	1	11	7	0	7	10	0	0	0	14	0	0	0	0
ACTAATAACATTGGTCCGTTAACG	TRCN0000465353	ASS1	1139	839	950	712	502	256	276	501	595	323	320	224	40	35	204	44
TGCGAGTGCCCGGAAGGCCCCTTA	TRCN0000465354	CLDND1	2193	1987	1294	1468	633	545	622	555	580	384	484	546	37	74	265	251
TTGATTTCCAGTGCGAGAAGACCG	TRCN0000465355	HMX2	642	440	193	187	350	499	364	334	216	134	275	214	77	49	146	124
TCCAACTCCGTTTCATGTGCTCTT	TRCN0000465356	NO_MATCH_242	1917	1752	1555	1799	604	539	332	639	493	641	665	603	81	241	319	375
CTTACTCGAGAAGCCTAGGAGATG	TRCN0000465358	ZNF302	72	59	62	120	0	79	19	97	11	0	0	0	1	97	69	38
TGGTCTACGAGAATGCGCTCGCGA	TRCN0000465359	HSP90AA1	675	518	454	500	358	132	141	244	86	80	179	163	51	99	141	176
AGACAGAAGGTACACGGATGGCGA	TRCN0000465360	ECH1	1143	1072	670	1029	292	430	243	351	561	74	110	439	72	93	111	285
CACACGATAAGACCAAAGCAAGTG	TRCN0000465361	P2RY2	1366	1314	518	287	170	250	149	244	645	466	592	389	282	605	453	456
CCGTTCCGGCGGTTCACGTTACCG	TRCN0000465363	PLA2G1B	3153	2885	2404	2603	1310	1055	1004	1066	427	851	880	789	324	293	753	357
GTCTTCGCCATCGCGTTCTGGAAC	TRCN0000465365	DOC2A	1107	834	818	853	318	489	358	507	233	364	314	515	159	322	347	190
CATTCTTCTTCGGCTCAAGACAAA	TRCN0000465366	ETNK2	1195	942	828	920	307	425	348	411	500	239	318	373	55	255	261	341
CCCCCTCCTCTAAACAATTGGTAC	TRCN0000465367	PXK	1807	1707	1531	1613	591	530	544	561	250	279	310	631	34	376	317	213
GCCACGCCGAGCGCAGACTGGTCG	TRCN0000465369	DYRK3	1619	1311	1439	1470	415	451	429	316	307	222	254	297	165	50	131	158
ACCTCTACGGAGATGCGAGGACGA	TRCN0000465370	SDF2L1	2019	1608	1405	1771	674	566	519	552	376	308	920	272	98	195	390	424
GTTCGGCAACTTGGTCATTCCTGG	TRCN0000465371	CUL3	298	221	170	172	59	168	20	75	2	95	15	171	0	0	36	81
CCGACGGGGCTAGTGATCGCCAGG	TRCN0000465372	WFDC11	8931	8949	7663	6984	2877	2489	1972	2618	1695	2171	1610	1311	413	644	1622	772
AGCACGGGCACTTTCCCCGGGACC	TRCN0000465373	NHLRC1	3300	2873	2499	2789	1117	1045	944	1220	724	1511	851	891	432	394	591	340
AAGCCATATTTCATAACCAGGTTG	TRCN0000465374	SPINT1	807	605	569	707	219	296	250	250	287	161	258	139	111	115	254	339
TAACGATTTAATCCCGCAGACTTT	TRCN0000465375	CCDC148	2557	2104	2022	2276	877	704	1038	1108	761	912	345	822	341	190	533	227
CGCAATTACCGCCGTCAACACTGT	TRCN0000465376	MAP3K6	355	251	124	257	44	66	217	105	42	69	5	67	1	22	18	0
ACACAAAGACGATGAGACGCTTTT	TRCN0000465377	BMPR1A	1555	1246	1136	1406	421	432	357	801	294	237	162	257	207	268	243	212
ACTTAGACCCCAACGAAGTGAACA	TRCN0000465378	TNFRSF6B	3738	3009	2899	3188	1160	909	726	1249	1051	1236	1012	517	402	343	702	570
ACGTGGGATAATGCGCGGCGTATT	TRCN0000465379	CRYGA	10129	8404	8398	8919	3840	3193	3080	3627	2275	2082	3172	1913	774	1084	1631	1616
ATAATCAGGTGTGAAATCTATCAG	TRCN0000465381	REEP2	216	165	120	117	26	76	88	68	31	40	18	86	16	1	2	85
ATGGCGATGCACTGGCCCACATGA	TRCN0000465383	MGST3	2177	1608	894	800	516	461	383	304	680	1097	479	510	289	399	561	294
GACGCGACGGTGTGGAGACCGTAT	TRCN0000465384	MGST3	3466	2963	2889	2589	1227	1421	1026	1112	1006	1256	972	818	355	572	351	432
CTACCTAATATATCTTACTAATCC	TRCN0000465385	RENBP	3443	2833	2725	2608	1123	953	825	1152	696	975	392	556	176	513	533	258
TTGAGTTATACTACCGACGATTTG	TRCN0000465386	SLC37A3	298	149	153	93	84	31	184	43	17	0	40	28	40	93	4	45
GCTCCTCCCCAGGGTTGCAGGGTG	TRCN0000465387	S100A7	1934	1696	1505	1490	622	827	590	579	503	767	374	217	194	133	545	367
TCACCAAACTGTGCCACGGGTCGA	TRCN0000465389	STEAP1B	6167	5704	5161	5197	2873	1886	1802	2104	1169	1904	1188	1579	736	565	777	771
ATCGGCAAGCCATCCCTGGATCAC	TRCN0000465390	SHC1	951	666	576	726	328	412	208	382	196	313	266	208	65	35	476	266
CTGTAGTTTTTCCGGGCTATACTC	TRCN0000465391	PLK1	397	268	147	214	97	94	78	146	262	51	16	22	38	37	110	42
AATTCTTTGTGAAACAGAGTACAT	TRCN0000465392	ARHGAP8	552	303	319	358	228	213	402	236	116	163	172	234	84	62	247	293
CCGAGCTAACCTATAGCACCACCA	TRCN0000465393	PTK2	1113	915	850	608	250	324	131	419	219	0	204	248	67	210	223	5
GGTAACAGCCCATGAAGGTGTATG	TRCN0000465394	SUB1	9877	9050	7907	8617	3461	2962	2030	3664	2561	2097	2498	2174	846	815	1145	1324
CCCGTTATTTACTGAGACAACGAC	TRCN0000465395	COL20A1	1391	1055	1111	946	409	334	293	333	219	357	321	170	205	150	24	150
ATGTGTGAGAATGTTATACCAGTC	TRCN0000465396	SLC48A1	2086	1559	1759	1767	934	878	644	715	341	599	573	712	139	238	109	228
CGTGTAGCACCTTCTGGCTCTCTA	TRCN0000465397	HMGN2	3872	3414	3598	3836	831	882	674	793	787	819	1072	445	262	359	391	352
CCCAGAGACAACCCGCAAACTTCG	TRCN0000465400	AGBL3	2905	2355	2051	2357	924	1008	564	813	683	548	424	707	205	158	317	523
CACGCCTATTGTCCATGACACCGT	TRCN0000465401	CALML5	1894	1854	1872	1540	618	552	554	438	599	446	653	317	188	135	229	130
CTAGCGAGATACATAGTTCGCTAC	TRCN0000465402	FGFR2	1454	1104	951	1022	335	504	346	378	503	355	304	494	27	240	140	42
TCTTATTACGTTTGTAATGTCAAA	TRCN0000465403	ELOVL5	1665	1309	1053	1378	565	569	285	533	400	539	707	511	146	76	359	413
TCGGGACTCCCCCGGGGGTGGAAC	TRCN0000465404	OGFOD3	2800	2296	1816	1900	1005	799	853	913	601	590	663	633	207	335	480	354
GGGTTACTCTTTATCGCTAATTCC	TRCN0000465406	BCAN	1095	752	793	692	253	407	196	182	356	209	77	427	37	34	206	81
GCAGCCAAAGCAAGGATGCCCGGA	TRCN0000465407	HEY2	4140	3696	2520	2623	2159	1599	1099	1574	1239	940	1692	850	283	510	530	800
CACCCATAGAAGAATTACCGCCGA	TRCN0000465408	NPIPA1	13508	13250	11772	10959	4478	3378	3394	4523	2598	2372	2760	2752	830	1421	1808	1735
AGGGACTCCATCAGTGAATGTACC	TRCN0000465409	GPR180	4697	3932	4249	4161	1771	1789	1609	1656	1045	1180	1563	970	460	697	628	856
GTCTAATCTTTCATAAAAATGCCG	TRCN0000465411	PEA15	951	709	639	549	278	405	295	343	234	578	310	411	57	97	115	269
GAGTGACTGTGTTGATCTTGACTA	TRCN0000465413	HIGD1A	601	487	346	342	226	91	42	169	105	232	49	42	99	2	2	43
TTTGTTCTGCCATCCCTCGTATTC	TRCN0000465414	RNF5	802	559	610	803	396	202	263	408	318	318	409	330	55	127	110	280
AGTCCGAGTGCTACAAAAACAAAT	TRCN0000465415	ATF6B	1448	1097	1145	1082	607	420	495	436	288	452	436	213	86	129	288	393
CACCCCAAGATATTCTTCGATTAC	TRCN0000465417	RPL30	9203	8928	8074	9091	2714	2912	2621	2847	2211	1940	1688	1818	1074	987	1340	1063
AATATCTCAGCGAGGGGATTAATA	TRCN0000465420	SYT16	648	395	469	572	267	574	412	249	263	227	240	370	77	122	94	353
TATATAACATACCCTTTCGAAGCT	TRCN0000465421	DYNC1H1	2678	2124	2129	2241	1096	643	814	1017	634	800	397	625	266	581	810	554
AACTCAGCGCCAGAGCCATAACGC	TRCN0000465422	OSMR	3066	2448	2442	2621	1410	1209	1218	1394	745	1110	862	663	527	671	832	365
CAAGGTCACGGCCACGCTCGGAAA	TRCN0000465423	LINC00486	9633	9447	8630	8255	3267	3537	2213	3157	2014	1854	1803	2457	721	993	917	1199
AGAGGACCTCTTTCGGCACCTCGG	TRCN0000465424	TSNARE1	2023	1420	1329	1482	627	609	410	595	261	314	454	415	153	110	368	201
AGGCCAAGTTCTGACCGGTTATAA	TRCN0000465425	TMEM80	6584	5530	5761	6739	2452	3058	1935	2812	1569	1499	1523	1926	328	702	1057	1009
GCAAACGGCGACAATCATTATAGC	TRCN0000465427	BRAT1	5011	4381	4347	3599	1157	1846	1255	1652	1249	793	962	1403	399	946	645	548
TGTAATTCTTAACGTAACGTACCT	TRCN0000465428	ZNF641	7715	6767	6347	6601	2725	2621	1682	3023	2011	2581	1388	2608	347	722	1375	1188
GCTCTGGAGTCGTTACAGTTTAGG	TRCN0000465429	DTX4	365	298	245	353	163	88	74	79	490	340	0	91	1	19	46	312
GCGACATGGAAGAGCTAACTACAT	TRCN0000465430	KIAA1324L	918	643	872	744	238	230	277	454	174	179	152	318	92	69	451	69
TCGACCCCCGCCGTCGCCAGGTTG	TRCN0000465431	TAC4	2999	2810	2193	2261	1010	755	673	1016	594	589	713	944	133	246	481	465
CCTCGTCACCTTATTCTCTAAGCA	TRCN0000465432	A1BG	1876	1607	1333	1413	490	472	590	515	427	205	364	437	185	176	373	146
TACAGATGCCATTAACTCAATACA	TRCN0000465433	RWDD4	5335	4489	4607	4572	2159	1466	1391	1794	1359	2679	1175	1324	596	512	777	949
AATGCGTTATGTGTCGTTGCAGGT	TRCN0000465435	PLAT	917	511	736	829	269	235	262	275	136	190	254	246	53	51	170	136
AATCGGCGTTGTGACCCGCCTTGA	TRCN0000465436	ATP1B1	137	111	93	83	42	78	53	51	46	69	29	3	0	30	43	161
ATTTCCATTAATTAGTAACCGTTT	TRCN0000465437	ZC2HC1A	945	625	729	754	537	726	452	434	422	396	295	321	150	192	456	315
TCGCGTGACTATGAAGTCCGGGAA	TRCN0000465438	SLC25A30	5096	4339	3795	3892	1653	1596	1583	1580	1280	1086	1104	744	289	536	885	819
GCGCTGAGTGGGCAGAGTTCCATA	TRCN0000465440	CSTA	3455	3037	3581	2511	1055	1044	913	1272	888	796	856	418	268	446	390	825
CCTGACTAGTTGCCCATCCCATAG	TRCN0000465441	IFT80	307	232	203	155	111	72	22	80	131	0	0	41	59	47	2	26
GCTCCCAAGCAGACGTAGGAGGGG	TRCN0000465442	PRICKLE3	1529	1162	1371	1488	572	369	281	322	274	381	176	273	122	102	120	109
GGGTGATCCCACGCAGCTGAACCT	TRCN0000465443	SMIM2	3945	3251	2956	3211	1421	1149	820	1495	664	1283	670	755	216	86	247	431
TTTCCCTAACCATGTGAATACAGC	TRCN0000465444	FLT3	211	158	122	188	187	92	107	77	41	115	149	24	0	3	96	20
GTGGGTAACAGGAGCAGAAACGGG	TRCN0000465445	GBP3	3553	3045	3206	3436	1326	1003	1013	919	770	873	651	1009	494	728	442	582
TTGACAGCCTACGGCAATACTGTC	TRCN0000465446	PRAMEF15	3298	2498	2001	2349	1006	845	693	767	716	1115	797	423	433	767	553	494
ACTCTCAGAGATTCTTAGAGGTAA	TRCN0000465448	MSC	1264	1033	400	363	314	251	226	281	354	350	304	220	83	338	277	112
CCCTTGGCCACCCGTCCCCTTTTA	TRCN0000465449	LSM2	2552	2365	2132	2221	679	562	861	745	581	634	575	516	215	354	205	280
CCGAAAGCAACTTGTTGGTTTCAC	TRCN0000465450	SH3BP5	1111	1035	735	879	333	345	319	304	661	364	268	315	43	81	126	321
ACCGAGGTCTATATCCGGGTCAAT	TRCN0000465451	RWDD3	2657	2175	2063	2116	1080	1142	910	791	338	718	682	761	159	338	544	346
ACTCTCTGTTATTACCTATAAACG	TRCN0000465452	PRKCE	912	525	688	825	493	336	379	217	107	566	363	124	77	45	123	63
TGACGAGAATAAGATGAGGTGATC	TRCN0000465453	C8orf74	2092	1877	1579	1788	567	497	470	548	330	339	622	621	122	189	448	278
TGCGGGACTCTAGATTTATACGTA	TRCN0000465455	F3	6896	6523	5772	5514	2132	1615	1446	1766	934	1177	1560	1028	612	495	1298	1036
TACGGGCAGCTAATTAATAGCCAA	TRCN0000465456	XLOC_l2_009889	4914	4362	3724	4771	1755	1243	1368	1581	961	1273	1167	1187	396	266	905	590
ACTCAATCTGAGCTGACAATACGA	TRCN0000465457	L3MBTL4	2212	1558	2432	1806	647	816	672	826	442	545	747	745	59	262	620	159
GGAACTAAGGTATCGAAAGTCAGG	TRCN0000465458	GDI2	4943	4343	3917	3986	1600	1380	1021	1910	1367	1963	801	1061	420	554	949	478
CCATCTGCTCGAATATGACCAGGT	TRCN0000465460	SPRY4	3425	2900	2466	2451	930	773	730	900	696	374	972	676	153	160	239	150
TTCACAATTCCGATAGGGCGTGTC	TRCN0000465462	DNAJC17	554	449	465	363	96	117	109	237	5	97	81	212	57	16	69	127
GACATATTAACCCTTGTCTACTCG	TRCN0000465464	MRFAP1L1	2509	2182	1760	1813	1072	873	804	838	809	408	893	1038	159	704	483	825
TGGTAGACTAATACCTAGCTCCGG	TRCN0000465466	R3HCC1L	5019	4700	4121	4433	1756	1818	1307	1625	967	1041	1172	888	399	325	725	276
ATCCAGACACCCCATTGTTGGCTG	TRCN0000465467	PI3	2031	1534	1758	1613	643	818	715	910	1164	806	541	477	323	140	451	521
ATTCGTTTGTTTACACGGACATTG	TRCN0000465468	KCTD5	468	315	298	346	210	195	90	200	157	306	99	153	49	89	164	90
CCTGACATCCTCTCCATTGTTAGG	TRCN0000465469	PKD2L2	2775	2208	1993	2080	1401	692	769	756	345	833	450	473	505	169	436	426
ACTCTTCGTACTGGACCCTGATAT	TRCN0000465470	Zyg11b	2270	1966	1869	1970	881	1059	852	988	520	583	649	539	242	420	786	578
GCCATTATACATATATCTAATTCC	TRCN0000465471	CLEC1B	196	171	162	162	52	33	76	108	1	0	27	35	24	37	0	0
TTACAGCAACTGCTGCAGTGGCAG	TRCN0000465472	Tbc1d23	1378	1143	1030	1029	493	572	797	404	196	431	236	192	145	44	252	195
CCCTCCAGGCTGTGCGCTCCAAGG	TRCN0000465473	HCFC1R1	16003	15734	14295	14198	5266	5136	3609	5076	3064	4652	3989	3678	1220	1565	2431	1858
TCTCGCCGCCATCCATGCGACATT	TRCN0000465474	SCRN2	2073	1741	1822	1647	775	578	710	635	374	551	600	616	183	357	368	349
AAGCAACCACGATGACCGTACCTA	TRCN0000465475	FAM209B	1347	1149	977	1442	461	473	384	517	150	317	260	293	139	327	268	124
ACAGTTACATAATATATGATCTCA	TRCN0000465477	DNAJC30	4555	3953	3649	3677	1634	1618	974	1156	1041	1078	630	1034	184	525	534	593
GCCTGGGCGCCTGACCTGTTGATT	TRCN0000465478	FAM134C	970	587	574	521	284	318	230	164	228	243	197	151	71	57	91	89
CGCCACAGTTGATGACTAATCCAG	TRCN0000465479	COMMD8	10339	10162	8017	8704	3461	2675	2846	3126	1194	897	1637	1992	1220	878	908	1729
CGGTCCGACATGAATCACGGGTCG	TRCN0000465481	NO_MATCH_133	1166	1000	903	762	154	250	164	227	109	206	159	238	8	0	99	1
CCATTATGGCCAACCTAAACGCTT	TRCN0000465483	NDUFV3	3641	3033	2708	2495	911	792	732	771	362	1599	641	638	592	148	671	308
CGGAAGATATTGTACATCACAGAT	TRCN0000465484	DLST	14725	14054	11876	12920	3772	5022	2790	4112	2487	2712	3126	3736	937	1404	1637	2570
AAACATGAGATCAGGTGTTCACAT	TRCN0000465485	SPOCK3	1807	1166	1250	1286	605	574	642	474	663	351	425	496	249	279	235	449
CTTCATACGAATATCCAGTACGGA	TRCN0000465486	SCML4	4464	3805	3364	3494	1415	1518	1183	1414	777	1286	863	1289	594	405	591	1164
AGTTACTTACTTAGACCATTCTAT	TRCN0000465487	SREK1	2889	1834	2047	2155	943	1068	1007	1018	826	1029	923	519	81	570	276	843
TGCAACCTTCTACTGTCCGTCGAG	TRCN0000465488	TMEM242	11220	10279	9387	9948	3924	3722	2307	3080	2488	2522	3329	2289	817	1017	1716	1370
GTGGTAATTTTAACGGACCCTATA	TRCN0000465489	PTPN9	128	86	59	176	34	9	62	23	114	94	25	10	0	0	4	77
GAGATCAGAGCTTCTTTAACGTAA	TRCN0000465490	TMEM177	5290	4310	4210	4688	2175	1721	1943	1663	1374	1500	1528	1864	480	1071	1448	982
ATCGAATGGTCTAGCAACGGAAGC	TRCN0000465491	EBNA1BP2	2927	2362	2008	2340	1188	778	783	953	867	882	607	465	81	404	685	449
GTATCAACCCGAAACAATTTACCT	TRCN0000465492	GLOD4	5889	5204	4631	4851	2339	2218	1897	2250	1818	1188	1491	1782	686	571	1371	994
CTCGCACGTAGCCTCCAGTGACCG	TRCN0000465493	AFTPH	5832	5388	5003	4708	1783	1860	1501	2018	1400	1038	1255	1624	201	577	1020	1069
CAGACCACATTCCGAAGATTATTA	TRCN0000465494	MAEL	3970	3615	3052	3424	1110	1244	1269	1324	1268	903	1074	1349	381	542	925	913
CAATGGGAACAACATCACCCATAG	TRCN0000465495	PTMS	2133	1816	1580	1686	602	803	204	470	222	339	528	758	53	185	173	217
TTTCGGCCACACCAAGTTGAAAGT	TRCN0000465496	BARX1	815	660	507	704	197	371	237	212	160	317	172	312	53	100	374	90
ACCCGCCCGAGAACTTTAAAAATA	TRCN0000465498	MUSK	779	507	493	690	182	239	289	191	82	79	209	274	1	37	19	108
TGATATCTACTCCAGACAAAGCCG	TRCN0000465499	SNX16	4492	3999	3523	4304	1451	1392	1489	1342	1472	1523	558	690	498	368	529	569
CTAACCAATAGCTGTCCCTCGACA	TRCN0000465500	PELO	1378	1240	1056	948	467	415	346	481	269	308	39	169	23	68	152	92
CTGAATGTTGTTTTAGAGTTACGA	TRCN0000465501	CBLB	884	641	673	572	255	334	102	242	67	157	35	231	195	213	71	79
AAGACGAAGACGTGCTCCCATTTC	TRCN0000465502	NDRG2	1235	856	797	1031	497	448	434	520	170	277	493	389	50	202	212	142
GACTGATGGCTCGCGAGCTCGCTT	TRCN0000465503	JUNB	2066	1816	1068	1364	737	694	580	788	1009	542	604	428	197	295	323	336
CCTACGACCGATCGCTCAAAGTCC	TRCN0000465504	ZNF706	11978	11599	10724	11074	4024	3753	3072	4322	2384	3245	3058	2572	668	1194	1859	1164
TAAGCGGCACAAGTTCCCCTCGAC	TRCN0000465505	SPHK1	1353	1301	1066	1316	425	450	366	302	337	264	248	725	77	43	228	88
AACGAACAACTGCCAGGCCTATTC	TRCN0000465506	RBKS	949	742	742	695	301	454	272	313	478	375	135	234	139	102	188	99
CTAAAGTGTTCGTGTCGTCAGGAT	TRCN0000465507	MTMR7	1454	1084	964	1313	491	431	434	381	286	453	425	192	3	56	213	66
AGACACAACGTTAATAATACAATT	TRCN0000465508	CRYBA4	4879	4081	3834	3943	1902	2006	1496	2003	926	1121	1134	699	258	875	683	734
CCTGTGTACTCGTGCACAGTCAAC	TRCN0000465509	BVES	8218	7561	6870	6609	2916	2813	2075	2478	2185	1757	2014	1662	640	1055	1044	940
TCTCCAGATTTCTTGGTATAGCAG	TRCN0000465510	POU5F2	5599	4863	5253	5707	2523	2381	2121	2238	1317	1472	1756	1235	765	941	1206	1102
GCAAACATGCCGTACGGTATCAAG	TRCN0000465511	NHLRC4	2539	2139	1643	1594	657	634	622	1000	468	367	541	329	70	129	275	362
TACGGGCCCGTGCACATTAAAAAG	TRCN0000465512	KRTAP9-2	5145	4402	3990	4125	1614	1623	1211	1682	1240	797	1094	1068	279	638	576	293
TGCTCATTGTATTAAGGTGATTTC	TRCN0000465513	HRASLS5	8150	7082	6727	7287	2651	2193	1983	2399	2192	1703	1752	1920	436	937	1127	969
ACGGCACTCTATACGGCCTTTGGT	TRCN0000465514	ZFP36L1	912	736	219	375	357	334	248	343	160	360	200	177	213	164	89	263
GCGGCCCCCGTTGCGTCCTGAAAA	TRCN0000465515	PRPS1	1582	1607	1520	1314	562	735	430	552	173	250	297	469	27	142	390	31
CTGACAAAAATGTACAGTCACAAC	TRCN0000465516	KIAA0101	6404	5943	5296	5545	2090	1881	1712	1963	1218	1904	1575	1518	622	826	737	921
GTTGCCGATGGCTGCTATGAGATT	TRCN0000465517	NO_MATCH_218	2028	1637	1503	1876	709	483	618	636	399	443	675	711	278	221	469	385
TCCGTGAAACATATGAGGCACTGA	TRCN0000465518	EIF4A3	4308	3882	3170	3715	1452	1367	1367	1455	1013	838	826	1094	441	726	803	694
CATCAGTGCAGATACTCGCAGCCG	TRCN0000465519	FUNDC2	3919	3721	2946	3204	812	949	936	1030	873	1117	793	763	520	455	559	759
CATACCCCTGGGACACATCATTGA	TRCN0000465520	NFE2	2646	2544	1912	1753	630	746	447	414	660	581	806	839	329	256	522	620
TTTTACGTACGTCTACTGTTGTTT	TRCN0000465521	ALG12	1070	679	680	637	337	497	341	255	144	232	447	418	136	169	122	525
GAATTGCGCGCTTCAACACGCTAT	TRCN0000465522	RPL23A	2379	1912	1787	2077	887	838	754	806	553	627	381	457	140	366	472	331
GTACGGACATCCGCCAAAATCTAC	TRCN0000465523	PNPLA1	779	660	523	513	357	241	209	318	149	174	224	229	33	112	20	72
GCCATCGTCATACTCGTTGGTTCC	TRCN0000465524	DNAJC10	576	331	378	334	166	103	153	81	249	272	52	197	33	45	1	330
GGACTCATCTGGATCCTTTCTGTA	TRCN0000465525	KPNA5	4751	3626	2737	3900	1471	1407	977	1433	776	565	658	1636	532	305	635	432
GCACACCCGTGTCCCTTACAACCA	TRCN0000465526	CKS1B	5595	5184	4856	4789	1700	1560	1489	1674	1232	989	1718	1445	613	561	933	898
ACCATTAGCTTTGGCCTCTAATAT	TRCN0000465527	HACL1	6643	5522	5909	6156	2365	2504	2144	2561	1990	1677	1896	1730	333	874	911	1192
TCTGCTTATGCAGCGCAATCAGAC	TRCN0000465528	RGS8	2710	2270	2011	2064	1092	1010	957	809	682	529	750	587	312	401	271	355
TTAGATGAATCCGCTCATATCGTA	TRCN0000465529	CDIPT-AS1	7223	5901	5603	6162	2827	2721	2130	2737	2457	1767	2106	2071	731	1112	1346	1522
GGTAGACCTCTTCCCCGACCCACC	TRCN0000465530	KLK3	1066	952	800	828	361	294	291	403	252	354	121	200	117	151	267	55
TGACTCCTCTATTCTTTGGCACAT	TRCN0000465531	ANKRD13D	1733	1141	1305	1159	741	1026	548	681	472	412	336	382	137	92	261	313
AGGCCTTGCTTATCACTGTCGGAG	TRCN0000465532	NO_MATCH_55	3368	2653	2262	2734	1185	1354	1002	1200	889	1022	865	1240	476	279	958	117
AATTCCCATTGTGATTGGGCCTGC	TRCN0000465533	ZNF101	2128	1457	1681	1695	985	1024	870	1014	976	756	831	1106	196	216	456	593
GACTCACCTACAGCCCCGATCGCG	TRCN0000465534	AIMP1	6514	5522	5017	4780	2135	2686	2019	2293	1192	1832	1252	1234	795	799	973	1386
GTTGCGGACCGGATACTGGCCCTC	TRCN0000465535	RPL15	3774	3288	3059	3391	1315	1184	1136	1338	1069	1091	1147	912	338	590	698	761
TCAAGTTTGCTTCTAAAAGTAATT	TRCN0000465536	ARHGEF10	2385	1811	1887	1856	711	653	866	681	1006	707	565	549	93	203	210	237
TCAACCGGGCACGCAACGACACAA	TRCN0000465537	GALNT1	7288	6670	6858	6587	2628	2279	1824	2660	1999	1420	1192	1176	454	496	537	1121
AATCGGGACTGATGGGCAGCATGG	TRCN0000465538	VWA5A	1371	930	921	1126	486	393	411	507	437	306	454	309	52	185	248	266
TAAGCCCCTCGCCTTAATCTTTAC	TRCN0000465539	COQ7	1881	1456	1332	1272	715	596	379	506	169	709	317	566	124	373	302	201
TCCCTCGACAATAACCTACTCAAA	TRCN0000465540	CXXC4	4956	4309	2179	2276	1256	1124	1098	1200	1654	1394	1339	1200	713	743	1040	1217
ATTACATGCATGTACGCTATACCG	TRCN0000465541	MRPS24	1774	1269	1311	1543	707	743	618	766	734	692	389	620	225	395	468	272
TCAATGTTTCTCCGGTTCTGATCG	TRCN0000465542	SRP54	2167	1787	1708	1448	850	944	636	759	914	348	277	504	253	437	238	311
GATCAGGACCTTAGTTCCATGCAC	TRCN0000465543	STAR	2524	2193	2028	2373	967	934	839	733	670	982	611	937	167	256	635	425
ACATGTAGGAGTATCGATTGTGGC	TRCN0000465545	PEX19	5456	4508	4403	4360	1868	1708	1501	2312	941	1209	1432	1895	964	715	688	795
GGTCATCTCACATTTCGTTTGACG	TRCN0000465548	MRPS25	3935	3648	2991	3516	1342	1444	824	1280	1033	1073	976	793	192	845	587	685
CCCTTAACTCAAGAATGGTATGTG	TRCN0000465549	MLLT10	5136	4490	4024	3972	1303	1494	906	1586	1062	988	1114	771	334	450	745	582
GCCTACCGAGGCATGCGCGGTGGC	TRCN0000465550	CSTF3	4411	3761	3804	3693	1551	1322	1288	1473	802	978	932	782	544	476	698	786
CCTATCATCCAGACGTTTAAGGCG	TRCN0000465551	MDK	3725	3476	3236	3438	1104	1315	1076	937	666	593	842	831	296	576	390	563
GTGGGTCCATGGACACACGCAACC	TRCN0000465552	SERPINB3	2357	2006	1693	1867	823	699	843	796	872	498	666	656	317	351	435	652
CTTCCTCATGCCCGGTCTTACAAT	TRCN0000465553	FANCI	2937	2401	2571	2189	882	1009	773	1019	975	482	660	664	197	281	409	334
ACCGCACTCGCACGGCGTGGGCAC	TRCN0000465554	FRMPD4	6884	5869	6004	5928	2167	2138	1882	2272	1339	1576	2041	1236	544	671	1479	1656
ATCTTTTGACGCACCCCCCGACCC	TRCN0000465556	NO_MATCH_75	988	706	736	761	407	489	313	373	493	283	444	203	141	213	270	215
AGCCCGCTCACATCTTTTAGGTCA	TRCN0000465557	ANGEL2	1060	910	643	863	235	276	200	253	204	218	195	339	21	58	237	157
GGAATCCGAAAGTTGTGTGCCAAT	TRCN0000465558	SLCO4A1	2878	2238	2228	2082	466	344	312	500	478	846	369	944	79	165	184	715
AACGTCTACCTACTGGCACAAAAC	TRCN0000465559	BAIAP2	549	414	291	623	171	127	125	275	141	76	69	160	34	52	25	64
ACTAGGAGTGACACGACGAAGCGT	TRCN0000465560	ZBTB45	1639	1413	1295	1100	576	536	380	428	434	422	198	154	115	41	238	284
TTCGTCCCGGCAACTTTGAGGCCC	TRCN0000465561	TAF9B	2372	1872	1874	1788	982	907	733	855	647	708	692	625	160	260	623	582
CTCTCCCACCCTTTATCTCAACTC	TRCN0000465562	JAK1	279	232	170	106	177	64	37	90	145	173	41	20	152	76	91	0
AGGCTCCTCGTGCCTCTTTCACAA	TRCN0000465563	ZDHHC7	1465	1108	958	1140	399	479	430	363	322	685	302	495	15	316	239	462
GATCAACGCACAGCAGCTATTTCC	TRCN0000465564	VPS53	48	37	16	26	18	2	4	18	18	0	19	0	0	0	0	0
CCCAAATTCATTTCTTATAAAACC	TRCN0000465565	RIC8A	241	159	303	160	45	31	4	26	0	78	67	64	15	0	0	31
TATGGTTATTATAGCAGACTCGAC	TRCN0000465566	HLA-G	820	669	520	748	305	321	370	174	118	282	109	316	98	259	152	48
CTAAAACCATGTCTCAATATCTTT	TRCN0000465567	NUP37	3940	3598	3355	3224	1586	1491	1205	1269	715	861	1085	685	358	550	817	668
ACTTCCTGGAGAGGGGCTAACAGT	TRCN0000465568	WBP2NL	4075	2948	2751	3003	1606	1389	1381	1661	1434	1171	1664	1046	270	195	771	560
ACCTTAGACGCTCCTTTTCGCTGA	TRCN0000465569	TAC1	5592	4632	4454	4456	2065	1891	1855	2024	1576	1465	1399	1123	382	592	681	734
AAGTGGGAGAGTAAGTGCCTGGTC	TRCN0000465570	PRB4	2575	1977	1864	2468	1310	989	800	961	955	900	665	670	210	293	799	480
TGTAGCCATAGAGGTGAGCAAAGG	TRCN0000465571	RND1	4797	4413	3709	5180	1434	2050	1289	1300	1039	798	613	1197	273	708	523	876
GATCAGCCTGATCAAGTAATAAAT	TRCN0000465572	ZFAND5	2770	2233	2293	2383	1005	1204	834	1121	947	922	672	462	292	364	415	565
TCTGCAGTTCTGCTGTCACCGCTA	TRCN0000465573	ING5	3464	3003	2417	2577	1435	1312	1004	1432	605	989	1272	1127	169	849	519	518
CAACATATCGTGCACATGACTGCC	TRCN0000465574	NO_MATCH_83	2508	2536	1954	2065	653	543	358	701	583	585	388	492	274	217	321	177
CCAAGCGACCCTCCATTGGGAGAC	TRCN0000465575	RNFT1	8475	8506	7332	8179	2585	2170	2096	2846	1711	1984	1481	1667	760	793	1162	1369
TTCAATATGGCCTGAGTCCGTGCG	TRCN0000465576	VTCN1	3379	2717	2881	3003	1302	1311	1148	1440	805	804	945	681	245	545	596	477
TAGCCTGACCTATTGACCCCCAAT	TRCN0000465577	MORN3	3508	2997	2773	2888	1144	1229	1222	1138	475	547	1076	808	148	415	728	372
TGCATGACACCAAGGCCATCATCG	TRCN0000465578	UTP14A	860	631	706	628	210	289	195	135	248	149	471	113	77	115	113	42
AGACATTCACGATCATTTAAGTCT	TRCN0000465579	MRPS33	4945	3779	3832	4473	1717	1877	1503	1932	1402	2103	1094	1159	399	670	997	813
TAACTTGACGAAAGGACCCTGTGC	TRCN0000465580	EIF4B	1285	865	1000	926	398	202	474	362	236	461	146	236	0	74	94	224
GAGGAACTTTTGAAGCTGCAGCAA	TRCN0000465581	HGF	1862	1585	1612	1567	553	642	449	516	590	377	529	536	120	189	368	284
CAAAGCGCTGTATGATGGCGTGGG	TRCN0000465582	AKT2	1575	1377	1494	1750	404	248	362	593	215	265	236	160	19	91	37	33
AGTTCATCCGGCCACCCTCAACCA	TRCN0000465583	BUD13	2040	1353	1311	1674	525	527	317	691	419	332	427	395	18	285	323	209
ACTCTCACTAACTTTTGCATTTCC	TRCN0000465584	ZNF169	242	180	162	223	103	94	108	106	69	399	86	24	0	21	34	29
AGAATCAACACGATTGCACTCCGA	TRCN0000465585	DCLRE1C	245	177	126	285	80	118	60	49	74	174	0	26	0	0	0	0
TGACTTTAATCGCTTTACTTAGAA	TRCN0000465586	ASAP2	26	9	5	4	0	0	6	3	0	0	0	0	0	0	1	0
TGAATTTGTTCTGTCGAGCGCGGC	TRCN0000465587	BYSL	4218	3390	3346	3046	911	1122	948	1266	661	506	804	545	276	222	665	785
TTTATAATACCACTGGCCCTTGAT	TRCN0000465588	POLH	835	555	571	716	443	353	225	287	278	184	280	333	88	129	236	19
TCGGGACCCTACAGAATTAAACAT	TRCN0000465591	TAF5L	3996	3514	3461	3495	1388	1279	961	1438	990	1258	725	761	279	409	877	765
ATCTATTATAGAGTCCCGACGCCC	TRCN0000465592	ADAM30	211	95	135	154	142	145	78	106	50	66	11	0	86	11	40	35
AGTATCACGGCTATGGGTACTGAC	TRCN0000465593	MGAT1	4	4	2	0	0	2	0	0	0	0	0	0	0	0	0	0
GACTAGGTCGTTTTACTTTGCTGT	TRCN0000465594	C1QTNF4	3207	2732	2626	2765	1369	1135	825	1253	870	881	931	680	326	408	353	928
GACCCAACGGCATACCCTTGCCGA	TRCN0000465595	ZC3H11A	1758	1205	1452	1311	566	427	547	444	281	346	521	475	136	110	302	444
CATACGACGACCCCTCAGTGATGG	TRCN0000465597	SNX7	144	107	84	63	5	21	52	9	42	36	8	0	0	0	1	20
AATAGGGTCGGAGACGCTATGTAC	TRCN0000465598	PCNA	20	15	9	11	2	0	8	7	0	0	8	0	0	10	0	0
TTCGGGGGTCGTGACTCGAAGCCC	TRCN0000465599	MRPL16	141	143	56	142	75	120	55	23	0	14	75	49	0	0	0	0
GACCTATTTATTGCTCGGAAATTT	TRCN0000465600	MEI1	274	192	281	221	98	106	69	86	1	40	24	6	43	25	22	24
ATTTGATTAAGAACGGCCCGGTAA	TRCN0000465601	ABT1	927	639	786	746	408	442	440	388	426	258	282	451	217	138	267	238
ACCCGAAAACACTAATTGTTGGCA	TRCN0000465602	SLC25A17	11015	9530	9103	9629	4281	3548	2917	4210	2448	2339	2875	3062	962	749	1639	1303
TAACCACCCTTTTATTTACAACGA	TRCN0000465604	GSTM4	2623	2397	2119	2785	893	914	712	822	869	879	535	857	153	164	547	1053
CTACAAAATTAGTCGAGAGTACAG	TRCN0000465608	INIP	6500	5953	5520	5218	2243	2134	1731	1921	1050	1589	1859	1230	418	665	1514	951
AATAAATTTCGAACCAGTGAATAT	TRCN0000465609	ATP6V0E2	934	589	618	704	447	391	332	426	382	402	456	415	59	163	381	391
CCTGTACCCGCACTACGTGTTGTA	TRCN0000465610	UCK2	1408	1346	957	1264	208	409	333	268	435	321	249	417	65	50	250	211
GCAAGATCCGAATCGCGACCCCGG	TRCN0000465611	GNPTG	5441	4923	4032	4748	2519	1586	2071	1571	940	772	1169	1412	478	694	1229	852
TACCCCGGGAGATTTTAATAAGAC	TRCN0000465612	EIF4H	8157	7548	6239	6593	2739	2881	1792	2380	2898	1989	1984	1624	811	852	1572	1286
CGATCATCGCACGGGACACGTACT	TRCN0000465613	BLCAP	458	411	328	355	226	179	29	123	45	1	8	114	37	1	120	1
CCCGACAGTAGCACTCATTGCTGG	TRCN0000465614	C17orf47	45	30	35	38	0	2	26	5	0	0	15	0	0	0	25	1
TCCCAGAAATACCACCCCCGTACA	TRCN0000465615	SPATA2	61	44	92	25	18	27	0	74	0	0	0	44	24	0	0	0
GCGATCTCTTAACCCCAAGTATGA	TRCN0000465616	MRPL44	1397	1119	934	1199	592	477	421	550	343	591	469	161	173	335	300	526
TAAGAGATCCAGATACTGAGTTCG	TRCN0000465618	MMP2	1712	1096	1150	1151	374	295	417	404	410	392	263	321	145	90	496	334
GGATATAACAACTGAGTCGGCTGG	TRCN0000465620	SFN	4424	3827	3086	4390	1345	1116	1314	1640	1524	1507	832	915	181	302	490	1077
AACAAAACTCGTAACTTCCCCATC	TRCN0000465621	RPIA	2490	1980	1710	2455	881	1195	878	1276	779	936	977	854	268	239	496	515
TGCCTTCGGTTAAAAAAGCTCTCC	TRCN0000465622	CDX1	2720	2540	1995	2252	985	958	789	1154	400	748	605	441	96	271	260	448
CGGCCCGGGGGTTTCGGCTACCCA	TRCN0000465623	PCDHB11	868	697	513	976	157	142	125	191	54	70	121	77	134	5	338	51
GGTTGCTTGTGCATCGGCGCTTCT	TRCN0000465624	LHFPL4	1452	1257	1323	1086	453	446	335	455	228	221	628	293	27	228	252	318
TGATGAGACTCATTATACCTCCAG	TRCN0000465625	PDCD2L	6565	5992	5023	5795	2608	1592	1667	1661	1136	1181	1287	1409	721	574	701	883
CTGGGTGGGATTCAGCACTTATCT	TRCN0000465626	TROVE2	2400	1885	1919	2384	783	984	614	879	751	988	530	394	196	95	260	228
GGCTTTCACCACGTCGAGGTGCGA	TRCN0000465629	KLHDC9	1410	1208	1089	1058	334	340	302	274	264	269	220	224	70	48	219	111
GATCACGGGGCAACCCTTCGATAC	TRCN0000465631	TAOK3	405	262	333	468	227	195	163	64	141	1	142	59	62	112	86	38
GATACCCTCCTCTGCCCGTTCCAC	TRCN0000465632	DDX31	1754	1216	1703	1533	450	727	611	485	437	503	465	274	187	102	205	261
ATGCCCAGAACTTGCATGTCAAAG	TRCN0000465633	TPMT	99	81	80	128	47	41	71	50	1	52	146	7	25	65	7	1
AGCACCTTTTTCTGGCCAACCAGT	TRCN0000465634	SGCZ	5383	4571	4661	4428	2180	2143	1584	1805	1774	1003	1238	1060	350	685	539	739
GCCCCCCAGGAGACTATCTATCCT	TRCN0000465635	XLOC_l2_009833	7183	6563	6567	5980	2536	2326	1915	2670	1269	1476	1604	1671	489	596	1079	623
GCTAAATAAATTACTAAAGGACGC	TRCN0000465638	ERG	45	37	29	38	0	52	0	7	26	0	61	0	0	0	1	0
ACCTGGATACACCATGGAGCCTGT	TRCN0000465639	KDELC1	46	23	41	46	17	7	8	2	0	0	0	0	0	1	22	1
AGGGGGGCCACCAGTTGCCTGAGG	TRCN0000465640	Prrc2b	4353	3790	3490	3943	1646	1594	929	1673	851	1323	1337	779	457	432	734	738
ATAACCATTGAGGGTAATTTTTAC	TRCN0000465642	C7orf49	3150	2329	2444	2287	1582	1480	1353	1275	1192	904	882	1009	272	299	943	890
AGCTAGGATTAACCCGATAGTATT	TRCN0000465643	WRAP53	2254	1683	1566	1750	690	762	853	730	428	303	400	829	123	372	218	500
AGCCTGGACAAAGCTTGTTGCAAA	TRCN0000465644	AAAS	3998	2915	3079	3530	1235	1402	927	1782	936	569	888	905	461	222	424	566
ATATGAATTGTTTCGATTTCCCGC	TRCN0000465645	ATP1B2	883	651	581	645	348	316	278	212	366	469	266	143	111	123	190	242
TTCTAAGGCGATGGCTCCTTCTAA	TRCN0000465646	AVIL	897	571	833	688	298	428	258	556	330	267	357	94	21	24	155	67
CCAGCAATTCATGAAATTGACCTA	TRCN0000465647	MKRN3	5426	5278	4319	4395	1594	1629	1353	1751	984	1166	1296	1441	542	1130	761	589
CAGCGGCAAACTCAGCTGAACCGA	TRCN0000465648	TMEM14B	4834	4656	3791	4390	1435	1318	966	1326	791	1365	844	981	374	281	887	397
CCATCATTCCCGACTGACCGATCC	TRCN0000465649	HAVCR1	4200	4134	3430	3801	1326	1260	796	1561	770	636	839	1280	310	550	470	533
GTCAAGCACAGCGTGAGCCTTCCG	TRCN0000465650	FASTK	1484	1185	671	617	347	238	256	474	460	152	272	420	55	98	435	326
CTCAGCCCGCGGGGGATATCACAT	TRCN0000465651	SLC41A3	2648	2170	2007	2069	1127	683	656	1013	395	351	586	471	152	271	408	347
GCTCACAACTCTGGCGTCCAACTT	TRCN0000465654	FERD3L	1274	990	422	476	546	522	271	480	302	661	292	603	271	260	457	471
GGACAAACTCAGCTAAATGCAGTC	TRCN0000465656	PRRT2	2773	2611	2001	2022	1082	961	668	984	474	870	371	450	115	299	383	283
GCTCACAGAACCAACCGTATTATC	TRCN0000465657	BVES	2989	2600	2515	2487	769	1051	836	865	455	700	816	1046	202	199	207	863
TCACGGTGTCGTACACAATTGAAG	TRCN0000465658	FGGY	2141	1761	1391	1702	636	566	739	555	718	590	1313	701	51	131	309	328
GTACCCTAGGTCAATGATCGGCAG	TRCN0000465659	SH3RF2	4869	4249	3859	4476	2079	1571	1511	1848	1110	1134	1268	1428	629	588	803	801
CTCAGGGGGATAACCCCGGCGACT	TRCN0000465660	SURF1	4246	3638	3311	3119	1119	1287	936	1320	514	1005	781	1310	186	408	689	537
CGCGGCTGACCCGATGTCTGCTGA	TRCN0000465661	NSMF	6310	5578	4533	4556	1310	1360	989	1753	711	898	953	973	220	596	347	612
GCTGTTGGAATTCATGAGATCTTT	TRCN0000465662	CNBD2	6367	5330	5790	5427	2175	1600	2094	2190	1587	1780	3533	1547	275	1144	1271	1723
TATCAAGGGATTTCACCCCGGACT	TRCN0000465663	MIA2	2074	1361	1891	1611	654	546	547	961	266	223	479	585	263	295	556	279
CGTAACAATTTGATCTACACTAGA	TRCN0000465664	KRTAP13-3	2507	2180	1554	1774	719	631	585	503	320	343	229	413	83	130	139	401
AAACGACCTCCGCTAAAGCCTCCC	TRCN0000465665	BTBD10	996	829	815	1019	352	348	343	398	409	195	573	184	96	161	226	87
TAGCACATGCAACGTATCATCTAT	TRCN0000465666	CA11	1544	1275	1254	1333	591	633	367	558	350	318	279	127	81	129	417	53
GGTGTCTAATCGGGGCTCTAGGGC	TRCN0000465667	FAM127B	3944	3579	3319	3404	1140	1037	831	1055	729	981	841	694	159	524	1142	369
TAATGTTGACCACCACCGTGTAGT	TRCN0000465668	AGBL4	3891	3211	3071	3087	1366	1274	834	1735	1095	1362	1536	1269	266	690	369	747
CCATAGACATCCCTATGACCTCGA	TRCN0000465671	GSTT1	3352	3315	2497	3015	1113	990	687	1044	881	1032	714	624	353	218	176	614
CGGCTGATCTACTGCGTCGCGACC	TRCN0000465672	TSGA10IP	2856	2545	1802	2511	694	948	437	652	354	668	270	324	153	153	352	399
AAAGGGTATCAGTCACCATAACAA	TRCN0000465673	RSRC1	1361	950	892	1144	459	455	630	668	831	437	213	386	106	176	211	302
TATCTAACCTTTAGAGGGCCCGGT	TRCN0000465674	MIA3	2532	1823	1756	1973	807	798	630	805	735	725	675	634	269	159	267	403
CGAGCGAGTAACCTACACAGGACT	TRCN0000465675	SIAH1	7804	8298	7510	6749	2383	2620	2158	2136	962	1203	2027	1996	397	523	845	1380
TGCATATTGTGGGCGCGACGGAGA	TRCN0000465676	GIT2	2142	1571	1418	1738	672	566	448	263	517	547	342	385	214	42	277	111
AGGGAGGGCTGTGTATCCCAGTCC	TRCN0000465677	IL1RN	3956	3282	2769	3725	1576	1445	901	1319	932	1124	852	1175	402	605	679	571
GCGGCTCTTCTGGTCATCTGTGAC	TRCN0000465678	NO_MATCH_179	8525	7912	7248	6810	2888	2443	2669	2780	1734	1922	3027	2149	634	875	1106	1300
TCGCTACTTCAGTTCATAAGCTTC	TRCN0000465679	NO_MATCH_249	640	522	489	552	178	143	49	208	129	273	179	209	21	66	60	260
AGGTGACCTATTCTTTCAGAAATC	TRCN0000465680	MAP2K5	970	696	729	723	433	458	369	287	238	419	178	141	132	167	19	171
TTAAGCGTGATTTTCCCGCTTAAG	TRCN0000465681	HSD17B11	3604	2991	3047	3058	1631	1694	1220	1178	1356	1028	1247	814	296	434	730	888
CTTTAAGCTTCCTATTATTTTTTT	TRCN0000465682	ETFDH	734	476	461	316	347	262	285	207	59	130	60	49	36	51	57	44
ACTTACTGTGCAGACAAGGGAAAC	TRCN0000465683	ADCK4	363	279	395	162	180	46	203	79	138	1	228	20	45	1	141	45
CTGAATCTTTTTCCTGAGTGGAGG	TRCN0000465684	TRMT6	115	77	106	61	16	2	7	33	66	0	0	0	16	0	0	15
TTTTCCTTCCTAATCTATAGCCTT	TRCN0000465685	GAPDH	474	407	445	479	218	326	240	195	165	237	176	191	39	122	117	58
AGCAGTTTCAACGATAGCCTATCT	TRCN0000465686	LOC101928751	6963	5807	6277	5750	2464	2412	2057	2518	1639	2355	1531	1678	723	1031	931	1286
ATGGATTGAAGTGGTTCCCTTGCA	TRCN0000465687	TMEM47	1736	1345	1400	1516	857	799	702	583	679	573	485	338	235	212	466	385
CACCGACAGTTACGCGATTAAATA	TRCN0000465688	NO_MATCH_86	6849	6242	5171	6040	1900	1676	1661	2048	1609	1382	1507	1712	197	697	919	813
TGACCGAAAAAAAATTTTTCGTTT	TRCN0000465689	MAP2K2	2180	1973	1551	2021	629	406	480	653	501	409	492	170	162	166	216	317
TCGTGTACACTAATTCAACAAATA	TRCN0000465690	SNX14	699	469	362	581	186	161	320	319	58	93	68	144	37	95	50	49
CGTATACTATCCAATCCCGAATTC	TRCN0000465692	KIF26A	4954	4492	4235	4622	1459	1366	1244	1330	613	1035	1009	880	171	293	558	687
ATCCAGTAGGCGATACGATATAGC	TRCN0000465693	C2orf15	1755	1316	1488	1514	733	475	672	596	761	698	267	275	184	313	212	206
CGGCCTGCCCCGTCGATACGATCA	TRCN0000465694	Gclc	748	600	600	586	295	230	263	323	251	224	208	302	22	73	170	193
GACTAAAGGTCGTCCTACCGATTA	TRCN0000465695	GRAMD1B	21	12	120	27	0	1	0	6	0	0	0	0	0	0	0	0
TGTGCTCACGCCAAATTCGGGCAG	TRCN0000465696	NDN	63	82	47	80	17	62	73	7	0	1	0	1	0	1	15	49
CCCGGGGAGAGCGAACGCCGAATC	TRCN0000465697	ENKUR	2194	2346	1592	1566	838	665	446	674	196	462	548	294	86	131	350	304
AATCCAATCATATAGCAACACCGG	TRCN0000465698	ZNF329	424	296	233	449	217	193	131	143	164	66	103	294	74	82	130	125
CAGTTAAAACCCGCCCAATTCCAA	TRCN0000465699	PRR16	4958	4785	4405	4272	1591	1519	1433	1743	876	1160	1034	1219	557	704	1114	881
GCCTTCAATGGAATTGCATCAATC	TRCN0000465700	ZKSCAN4	1967	1446	1175	1583	717	623	543	720	287	738	905	462	120	302	541	205
TCAATTTGCCATGGTTGCTACTTT	TRCN0000465701	HARS	1669	1192	998	1110	581	837	473	542	572	716	337	347	173	53	186	105
ACTGAATACAGCAGCCGCTCATCC	TRCN0000465702	RPL3	1442	1142	692	858	417	434	286	256	749	399	676	959	152	187	229	248
AAGCTGGGATTACTTCTGTACGGC	TRCN0000465703	EEF1G	2342	1580	1835	2020	1211	881	889	886	684	811	614	449	125	393	431	417
AGTTGCTCGGTCCCTCTCATGAGT	TRCN0000465704	ERICH6	3816	2561	2683	3132	1406	1540	1036	1242	1141	1297	628	684	279	551	667	676
CTCAGGCAAGTTTACGCTTGATTT	TRCN0000465705	LHFPL5	8278	7397	6627	6834	2927	2645	2031	2485	1807	1726	1386	1910	416	1396	931	781
TCCGATATATCCAATCTGGCCCCT	TRCN0000465706	CALML3	5106	4264	4086	3852	1969	1638	1174	1659	998	1453	1190	1005	251	643	661	818
ATTTAAAGGTTACAATCGGCATGT	TRCN0000465707	TMED5	83	79	59	85	40	48	67	35	15	50	24	33	48	1	2	8
ACATTACCATATTGCCCGAATTGG	TRCN0000465708	TBRG1	9127	7637	7313	7459	3900	3038	2726	2916	2677	2456	2481	1781	898	1251	1761	1102
CGCACAGAACACGACCTTCACGCA	TRCN0000465709	CDC16	4	0	0	0	0	0	0	0	0	0	0	0	0	0	0	0
TTTCGGTCGAACATAGACGACCGG	TRCN0000465710	SMAD2	1659	1126	1352	1564	826	721	576	500	455	407	212	227	126	191	295	565
AACAGCGACCCTGCGCGTTGAAAC	TRCN0000465711	RRAGA	2391	1892	2335	2352	1070	976	556	891	895	408	774	629	185	335	247	572
TCAATCCGACATCGTTCGTCCGCT	TRCN0000465712	GNGT1	2638	2290	1971	1991	908	1073	503	814	723	691	669	470	392	363	383	487
TATAGTTTGTCCTTGCTAAACACC	TRCN0000465713	INVS	3592	2972	2835	2850	1471	1225	1059	1069	855	975	1630	940	326	476	610	474
TCCACCTTGAATTAAACTATCGAT	TRCN0000465714	SMIM19	2093	1893	1974	1826	654	657	587	947	711	368	598	593	184	263	444	380
CAGCATGCTCTGCGTCTCATCCAG	TRCN0000465715	ABHD17A	2621	2392	2069	2233	763	575	696	811	628	924	388	800	119	195	366	435
CCCGCTAGCACTCTAGGATCTGGA	TRCN0000465716	TP53BP1	10380	10310	9323	9445	3806	3003	2773	3126	3045	1892	1692	2369	1018	1112	1944	1935
TCGTTCTATACCCGCCGCTGGTTG	TRCN0000465718	HAT1	114	89	28	33	6	1	16	20	18	9	11	0	19	33	12	0
ACTGCGGCTGATCAGATCCCCAGG	TRCN0000465719	MEIS2	2956	2427	1979	2472	671	640	596	565	681	373	469	366	107	171	561	427
TGTTGTTCGTTATACTAAATGTCT	TRCN0000465721	RPL32	3811	3123	2577	2243	1127	1557	817	1128	600	776	685	640	247	265	186	497
GGGTTTTAACGACCCCGTAGCAAT	TRCN0000465722	ANKRD50	1987	1456	1504	1705	534	638	465	757	949	923	472	458	166	294	408	143
TGACCGAGTATAGGCAGTCTTGGC	TRCN0000465724	ACAA2	1955	1625	1131	1385	656	647	386	743	233	183	401	229	122	142	167	302
ATCCGGATAACGGGAAGACTTAAT	TRCN0000465725	ZMYM1	839	566	514	675	312	311	178	231	125	240	84	318	55	303	308	181
TTTTCTCCCGAAAAATCGGCTAGC	TRCN0000465727	CRYGB	2283	1600	1767	1898	1273	1034	967	1042	681	981	750	811	259	450	592	625
CACTTTCGTGCTTTGAAGCACGGT	TRCN0000465728	MED20	189	143	165	81	104	23	51	69	1	0	45	22	16	0	0	1
AAACCAAGTACTCCTGGCATAGAG	TRCN0000465729	CBX7	916	693	602	738	384	417	290	393	226	153	251	266	62	53	273	320
TCAGTGCTGGGTAACATGTGAAAG	TRCN0000465731	C3orf38	643	618	526	652	190	90	104	145	115	205	52	165	50	117	88	105
TCTTGTGTCTTTCCGTAGTGTCGA	TRCN0000465732	HMG20B	2556	1993	1992	1949	668	519	555	806	544	605	339	363	46	302	345	210
GTCATCTTCTTCCTGACTGTTAAT	TRCN0000465733	YIPF1	2995	2325	2764	2396	1487	1111	956	1061	1053	1418	1085	907	255	513	503	472
GCACCTTCAATCCTCGCTCCCGTT	TRCN0000465734	SLC27A4	1390	1229	1053	818	580	535	313	561	459	267	360	134	81	134	454	428
TGTTTTTCCAGAATCTCGGCATTG	TRCN0000465735	NO_MATCH_283	4873	4260	3807	4090	1882	1917	1466	1688	1168	1446	1256	1397	303	548	768	793
GATTACCTTCAGGCTCCGGTCCCC	TRCN0000465736	NO_MATCH_167	4065	3366	3225	3564	1591	1435	1353	1343	1048	1088	1324	960	399	362	942	506
GGCATCCGACAGGTTCTCTTAACC	TRCN0000465737	ACVR1B	384	305	176	115	80	135	25	97	74	124	28	15	63	1	61	1
CCAAAATCATTATGGCTTATTATG	TRCN0000465738	NO_MATCH_103	7414	6826	5408	5308	2477	2017	1598	2082	1907	1268	1441	1516	458	805	835	839
TTTGCAAGGTCCGTGACCGAGTTC	TRCN0000465739	SH3BGRL	1726	1383	1394	1446	853	670	463	505	353	986	678	217	184	282	300	236
AGTTCAGTACTGAACTCTGTCGGA	TRCN0000465741	MRPL57	1103	886	971	984	447	443	378	406	388	288	301	256	67	117	208	151
CAAAGGCCTAAGAGGACAGAGAGT	TRCN0000465742	ORAI1	3946	3589	3392	3227	1653	1224	1061	1154	1142	1044	1191	741	189	436	439	631
TGATCTGGAGCCTATCTTGACCAT	TRCN0000465743	SPHKAP	227	158	55	112	0	12	178	52	88	16	15	1	1	0	1	80
CAGGGTCGTTTCACTCCGCTAAAC	TRCN0000465744	PNLIPRP3	1604	1494	1305	1636	568	518	774	539	478	388	480	227	148	335	301	126
ATAAGATTGTCACCCAAGGAATCA	TRCN0000465745	RPL13	2612	1826	1858	2049	1201	860	725	746	673	867	473	310	485	170	836	317
GTATTTCCGCGAATCGGGTCGGAG	TRCN0000465747	HIST1H4C	625	478	322	414	159	122	133	109	247	48	177	68	9	116	93	153
CGGTTCTCTACCTAGACCACAACC	TRCN0000465748	OSER1	3480	3113	2216	2395	932	1027	1176	1149	966	885	633	403	124	206	404	848
TCGGTGCGACCACCAACACATAGC	TRCN0000465749	CWF19L1	1010	735	976	618	172	414	379	336	64	172	231	93	212	15	64	141
CAATCGATTGGTATATCGAAATTC	TRCN0000465750	USH1C	1015	728	723	620	342	329	286	370	60	103	272	59	0	102	79	46
CAACCTGAGAGTGTTGACCGAAGA	TRCN0000465751	C14orf79	6894	6392	5138	6416	2257	1807	1450	2458	1361	1648	1436	1225	344	466	737	1206
ACTCTCAGAAAAGATCATCAACTC	TRCN0000465752	NDUFB1	3873	3142	3255	3009	1438	1439	991	1157	580	752	635	882	225	470	887	654
CTGCTGCGTTCCGGAACTCCGTTT	TRCN0000465753	REEP1	4841	4217	4229	3615	1567	1211	962	1269	995	696	1156	1512	637	324	757	502
ATAGTACTCACGTATTTCCTGATG	TRCN0000465754	MFAP4	2177	1581	1817	1661	1064	919	564	925	629	507	404	702	335	402	391	368
CGACTCTACAACCGTGCCGCCGCT	TRCN0000465755	HIST1H1A	8080	7819	6773	6438	2754	2313	1618	2070	1250	1017	1420	1390	560	411	1151	631
TCTCTTCCTTGCCTCAATGCAACA	TRCN0000465756	RDH11	748	519	566	772	239	271	246	260	121	159	166	243	44	148	84	66
TTCGTGCACGGCGTCCGCCCGGGT	TRCN0000465757	C11orf45	9140	7794	7069	7997	3625	3152	2878	3389	2265	1901	2414	2170	762	1216	1866	1222
CACGTAATGAGGTCTGCATAATCT	TRCN0000465758	NTF3	12343	11534	9566	10531	3726	4072	3327	3340	2519	3665	2710	2819	1228	1442	1882	1368
CGCCTGCGCACATCACTACTGGCC	TRCN0000465759	KCTD19	2211	1728	1606	1640	573	729	517	491	506	648	295	229	108	259	230	236
CCATCGCCATTCATCGTGCCCCGC	TRCN0000465760	PAPSS1	1420	1139	860	989	210	376	355	672	590	275	307	171	76	118	351	73
GGTATCCGCGATAGTTCGACGGTA	TRCN0000465761	GTF3C5	298	202	129	287	104	119	98	17	30	175	1	37	138	173	22	1
GCACCCCCAGGAGACCTCCGTCGG	TRCN0000465762	RNASET2	3065	2965	2869	2940	844	1132	785	1037	555	667	519	779	318	482	683	295
AGGGTAACTTACCGACTCCGGGCT	TRCN0000465763	PGC	6143	4881	5346	5568	1987	2191	1493	2180	1403	1508	1842	1458	383	473	950	836
AATGCTAGACATCCAAGGCAATTT	TRCN0000465764	PDE6H	1406	1034	1245	1176	683	579	627	574	497	391	420	505	150	227	362	426
CTTATAACTCTGCTTACGCATACA	TRCN0000465765	C7orf25	1913	1537	1698	1711	934	905	699	614	519	522	548	512	158	251	323	577
GAACCAGACCACCAAATATCCTTA	TRCN0000465766	SH3GLB1	2863	2664	2654	2388	1299	1157	1009	893	645	1188	866	678	138	266	304	665
CTTCAACTGATCTACACCTCTTAT	TRCN0000465767	KLHL14	1296	1104	1053	1004	481	341	431	451	241	583	214	139	98	92	115	173
TGTTCATCCGGCATGCGCCTTGCG	TRCN0000465768	LOC146880	5028	4374	4020	4305	1798	1383	1107	1463	1499	1163	1497	1231	229	342	471	784
GCGACGTTTCATCACCCAGACTTT	TRCN0000465769	ZNF468	3924	3312	3329	2881	1296	1108	765	1331	1191	506	1094	794	249	437	970	556
ACATTGCAGAAACTAGATCAATGC	TRCN0000465770	FXN	3028	2522	2625	2378	1175	1056	927	966	495	914	843	567	234	478	372	585
TGCGTTTGTACAGCTTGTTCGCGT	TRCN0000465771	HDDC3	3937	3283	2842	2890	827	1125	932	1403	746	676	891	470	356	414	419	493
AATCGTTACTAGACGAATTGACAA	TRCN0000465772	MTAP	2172	1613	1560	1806	688	1069	974	1063	965	980	1083	757	205	497	669	650
CGAAGGAGGAAGAATAATTGACTA	TRCN0000465773	FOXS1	14909	14521	12252	11340	4344	3386	3074	3118	2743	3321	2493	2515	1080	1261	1798	1515
CCGCGAGTGGATACGCACCAGCGC	TRCN0000465774	ST8SIA2	14283	13291	12158	12094	4836	5549	5228	5619	2313	3633	2656	3572	1104	2082	2080	2119
CTCCCTTCCAGCCCTTGCCGGGAG	TRCN0000465775	ERLIN2	3083	2834	2672	2504	1278	1276	907	1229	1265	1049	875	946	301	496	556	455
CTAAGCTAAGTTTCGTGCCGGAGG	TRCN0000465777	ART3	90	89	68	108	10	0	89	47	0	0	29	0	0	0	0	1
TTTGTATTCAGGTCAAGATGTTAC	TRCN0000465778	C11orf53	3175	2352	2687	2716	1046	1028	1281	1147	850	1435	1120	1284	330	473	525	1177
TCGGGCCACGCGAGTTACTGATTG	TRCN0000465779	GSG1	1772	1505	1814	1278	660	425	310	578	477	516	473	361	130	229	288	599
ATGCAGTAGCTTGCCTTGGTCCCG	TRCN0000465780	RPS27	925	757	590	767	390	426	190	298	263	267	202	254	67	91	302	274
CCCGCTCTGTGTCGGCCCGTCTAC	TRCN0000465781	SLC25A43	535	489	412	401	173	212	185	162	47	153	158	112	43	135	69	56
CCCACAAGCCCAAGACATCACTGC	TRCN0000465782	EIF4EBP2	7311	7157	6111	5344	2277	1603	1483	2090	1731	1219	1458	1202	564	577	848	557
GCATCGTGTCAGTGCTCCTGTGTA	TRCN0000465783	PIAS3	4191	3240	3763	4317	926	914	913	907	462	813	607	711	349	318	533	416
GGATTTTCTGAACATAACCACACT	TRCN0000465784	PPP1R18	2252	1527	1348	1138	666	689	513	540	598	107	562	503	266	152	153	374
CACCTTCTATTATGAAAACCCCTT	TRCN0000465785	GYPB	486	325	335	210	104	170	34	60	35	34	6	40	39	45	0	0
TGTCTCCGTTCACACTTGATGTGA	TRCN0000465786	CBX6	1180	973	742	803	267	398	329	343	434	222	213	170	33	52	169	24
GGAACCTTAGAGGTTGTACTTGTC	TRCN0000465787	P2RY2	1801	1457	435	625	376	500	235	206	647	672	843	884	246	549	762	802
ATTTCATTACTAATATTCAGCCAT	TRCN0000465790	ZNF695	1448	1005	1150	1242	811	1043	564	657	741	753	596	616	163	286	501	376
CCTTCTTTCCCTGAGATTACTTGT	TRCN0000465791	CCDC50	2019	1825	1649	1921	763	595	437	531	436	543	543	601	276	108	340	385
GTGGAGCCAGTCCTACCCGTGGCC	TRCN0000465792	CYB5D2	3572	3238	2727	2841	1478	1042	1247	1165	447	527	1191	800	223	438	610	661
GGGGTGTCAGGAAGGGTTCCCTTT	TRCN0000465793	ZPBP2	1058	779	647	849	513	323	442	555	398	346	182	86	63	276	140	170
CGTCGTATTTGTTCATTACAGATA	TRCN0000465794	BCHE	3592	2998	2892	3070	1123	1050	807	1109	742	1332	704	1299	132	90	1009	432
TGGAGCTAATCATGCTGTACACGC	TRCN0000465795	PTPLA	3330	3154	2389	2944	867	1136	710	811	1065	666	684	769	294	153	623	494
ATACCGATCTTGGGCTGATGTGGC	TRCN0000465796	PSMC1	2385	1823	1405	1691	712	696	590	651	710	629	621	635	150	306	499	236
TGTGGACAGGTCCTGGGGGCTTTC	TRCN0000465797	SLAMF1	10001	8776	8967	8654	3201	3148	2408	3049	1844	2366	2029	1595	806	877	1272	1647
CGAATTTTGTGATTCTGCTGAGTT	TRCN0000465798	UBL4B	3593	3326	3842	2902	1112	1057	1308	1132	284	640	863	570	182	291	592	548
ACTCGATTCGCGATAATTTCACCG	TRCN0000465799	NO_MATCH_38	7893	6540	6688	6273	2906	2668	2497	2856	1973	1802	2021	1909	667	570	1859	1216
AGTAAAAAACAGCTTATAAACCTC	TRCN0000465801	ZNF317	13	6	26	6	9	1	17	9	0	0	0	0	0	0	0	0
TAGGGGTGAACGCGAGCCTTCACG	TRCN0000465802	CYP19A1	73	47	82	52	27	79	5	6	36	0	1	11	42	0	0	0
ATGTTGCTTGATGAAGCCAGGCTC	TRCN0000465803	SPATA6	36	37	73	19	25	0	8	8	50	0	9	0	0	0	0	0
GGGGAATAGCATAGACGTCTGAAA	TRCN0000465804	GNG5	2	2	0	0	0	0	0	0	0	0	0	24	0	0	0	0
GAAAACATACACAAGTGTTAAGTA	TRCN0000465805	ZFP36	2662	2150	2295	2023	820	1188	753	960	780	552	831	728	266	174	818	241
GCCCCCCATACACAAGTGACTCCA	TRCN0000465807	PNCK	1394	1144	893	1164	523	359	282	386	405	427	516	240	45	93	230	146
TTCCCTACTGCATCTTGACCGTGA	TRCN0000465808	EIF2B4	764	598	533	604	327	149	199	211	167	286	216	320	38	244	243	55
TCTGATGACATGGCTGAGCTTGGT	TRCN0000465809	NAT14	2035	2214	1558	1593	550	352	437	518	273	270	597	278	221	326	363	261
ATACCTTGAAAATTCGGAATATGT	TRCN0000465810	CHCHD2	2923	2232	2311	2715	1378	1319	1145	1192	1127	851	668	1205	125	295	1037	627
ATATCTGGTCCATGAATATCTTTC	TRCN0000465811	LRRC61	1931	1449	1583	1635	978	842	543	731	879	491	467	870	140	396	366	480
CACCCCTCAGCTCAGTCGCCGATC	TRCN0000465812	DAXX	1130	786	823	639	319	381	299	369	48	392	230	90	3	69	215	111
GTTACTCAGGCAAATCTAAGTTAT	TRCN0000465813	KRTAP19-1	1492	1157	1266	1252	605	641	652	474	620	385	443	370	107	268	484	265
ACTTAAGAACTGACTCACTTATAC	TRCN0000465814	XLOC_009028	1305	1039	788	912	488	578	293	463	196	519	467	423	101	59	61	164
TCAACCCTCCTCCCTGCCTTACCC	TRCN0000465815	HAUS8	3695	3283	3344	3098	1471	1044	873	1103	918	987	849	1042	549	272	674	551
ACGCTCCGACACAGCGGGAGACCT	TRCN0000465816	VCY	4064	3454	3985	4193	1392	1148	1112	1164	855	1086	1195	909	301	455	697	1000
ACGCGACGGGTCAACGCCGTATCC	TRCN0000465817	WDR76	1324	963	1005	886	389	405	179	383	256	227	378	366	43	116	44	64
CAACAGGACTGTTGGACGCTCACC	TRCN0000465818	BBS5	5005	4525	3644	3586	1729	1503	1334	1657	841	1196	863	788	364	583	435	602
ACTCATCGTGCATCACCAGACCCT	TRCN0000465819	CLEC2D	4141	3488	3713	3337	1825	1432	1186	1592	1627	1648	1179	1110	554	535	900	775
TTCTAATCCAAGTCATCCATAGCT	TRCN0000465820	FAM160B1	854	622	637	850	449	368	321	245	245	90	288	299	21	27	270	177
ACCGACGCATGTGACATACGACTG	TRCN0000465821	CERS3	3374	2827	2603	3209	1122	936	793	1130	348	806	521	383	176	324	525	720
CTCTAAGCGAGGCTGTCCCCTTAA	TRCN0000465822	C1QB	1817	1767	1314	1452	538	739	531	676	748	497	501	780	70	191	338	54
AGATATATCGTTTCAACCCTCACC	TRCN0000465823	NO_MATCH_47	1322	1041	741	1048	361	666	272	441	164	666	172	629	64	162	217	196
GTATCACGCCGGCCAATCATCGGC	TRCN0000465824	AANAT	1793	1598	1145	1381	831	619	672	754	464	623	894	274	97	150	468	345
GCGTCCCAGAGCGCATCTACATGG	TRCN0000465825	SPESP1	716	640	629	668	349	234	141	138	174	89	78	552	29	60	142	129
GCACAAGACTGCGTGCGGCTCAGA	TRCN0000465826	GSPT2	2744	2079	2316	2526	1062	618	1224	787	725	563	767	366	472	401	427	383
TTAGACAAGAGATTTTGGCTGACA	TRCN0000465827	DNAJB6	51	46	21	52	60	17	29	20	0	0	15	37	0	0	0	0
CCCTACCTAGCGGGTCATGTGAGA	TRCN0000465829	ZSCAN12	39	17	31	16	14	0	2	17	0	0	0	0	0	0	0	0
AAGGACGGCCAGCCGTTGAGTTGG	TRCN0000465830	XLOC_l2_014086	415	295	345	305	166	167	114	237	27	105	180	185	54	24	116	95
CGACGACCCGGGAATTGTCAGCCC	TRCN0000465831	DPP8	2104	1589	1874	1365	674	284	523	497	603	312	530	215	202	99	111	65
GAAATAGCTCGTGCACACTAACCA	TRCN0000465832	SFRP2	3389	2691	3247	2796	1269	1125	1249	1294	596	1055	1336	898	478	645	1145	318
AACACTTAGCGCTCAAGGTAGGTC	TRCN0000465833	TMEM14B	1753	1273	1130	1185	719	736	503	803	503	310	390	422	33	351	314	276
TTTAGGACTAAAAGTTTGTCTACT	TRCN0000465834	RPS19	2858	2155	2356	2223	949	1105	725	1045	720	1229	751	1089	265	400	514	779
CTACTCTTTCTCCTAACTGGGATG	TRCN0000465835	ENSA	6427	5653	6114	5784	2312	1989	2081	2270	1931	1980	1559	1809	528	872	1245	1331
GCCGCGATCCGTACCATGCAACGT	TRCN0000465836	PTRHD1	6733	6327	5267	5281	2666	2191	2183	2368	1334	1564	1402	1591	679	913	1125	1037
CATTGACCAAATGTATTGTGCGCG	TRCN0000465837	XLOC_l2_015213	5450	4844	4759	4123	1934	1623	1155	1491	1180	979	1638	1256	456	589	770	990
ATGGTTCCGCCAAACGTGCTTTTC	TRCN0000465838	GIF	1855	1319	1449	1536	641	923	699	679	478	786	471	396	177	176	335	385
ATATTCTCGCTCGCTTACTTGGGA	TRCN0000465840	ALMS1P	1016	710	901	835	467	439	464	504	317	609	257	836	200	184	288	304
ACCCTAGGACTAGCTCCCCAAACC	TRCN0000465841	UQCRB	1189	1192	1155	1073	503	200	256	511	464	216	265	360	63	284	173	298
GAGGCAGATTAAAGCATGGCATAC	TRCN0000465842	CISD1	2409	2123	2094	2236	930	736	581	630	299	605	677	708	184	394	459	436
CGAACACCGACTGTTCTGACATTC	TRCN0000465844	DEFB104A	13459	13716	12441	12485	4498	3824	3213	4182	2603	2465	1994	2499	944	1976	1837	1585
GATAAATTAACAAATTCACTATGT	TRCN0000465845	GGPS1	2986	2226	2462	2834	1202	1089	1203	1491	954	671	811	706	394	314	690	442
CTCCGGAATGAATTCCATTAGAAA	TRCN0000465846	PCDHB16	1606	1104	1392	886	418	402	323	443	119	281	240	162	130	1	128	96
AGCCATCATACTTAGTTCCACCGC	TRCN0000465847	MRPL21	4245	3578	3136	4014	1622	1416	1622	1231	806	1227	695	1040	168	404	732	620
TGACTAAATTTTATTATAACCCGG	TRCN0000465848	GPR157	4473	3395	3817	4094	1261	1495	1087	1578	1063	870	1152	802	199	328	729	593
AGTTCACTATCAATGTATGGCTTT	TRCN0000465850	PSMC5	2112	1290	1159	1088	619	543	762	520	264	402	313	713	75	256	130	604
CTCTCCCGCTAGCACTGCACCTCA	TRCN0000465851	40606	2250	1771	1674	1546	564	892	502	545	604	434	638	851	52	151	441	133
CATAGTAGCGCACTACAGTTTAGC	TRCN0000465852	REEP6	1814	1669	1191	1232	617	344	314	425	300	426	208	369	54	105	213	238
ACGCTTACCGCACCAGTAAGAATT	TRCN0000465853	TRIM43	3803	2998	2780	2811	1610	1602	1495	1391	1202	1009	875	830	163	381	667	892
GCCATTTCAGTCTTGAGAGTGACG	TRCN0000465854	CCL2	3118	2733	2539	2629	1023	1148	1053	1117	863	832	687	976	344	216	825	356
TCATACGATCATAGCGAAGCCTTT	TRCN0000465855	UBE2Q1	3732	3272	2936	3381	1718	1326	1178	1324	662	1013	716	1138	202	152	718	429
AGGATCTGTGCCCGTCGTTCTCTC	TRCN0000465856	ISM2	0	0	0	0	0	0	0	0	0	0	0	0	0	0	0	0
AGTAAGTGAGGGAGAAATAGGCCC	TRCN0000465857	NO_MATCH_56	672	536	640	419	290	275	620	202	909	136	46	177	2	69	89	51
TCATCAAGTAATTAGGGTCGGTTC	TRCN0000465858	HIST1H1T	5994	5203	4429	4562	2238	2124	1369	1573	1636	1684	1214	1601	430	835	996	1211
CCTGATTCTTCAATATCCATGTAT	TRCN0000465859	KTI12	5721	5520	5005	5631	2192	2134	1389	1839	1088	1743	832	1875	378	354	1189	877
TTATTTGGGAGCACATGAATTCAA	TRCN0000465860	HEATR9	6662	5070	5287	5772	3043	2891	1744	2791	1885	2042	1945	2207	655	995	1434	1405
ACCTATGGCCATGGACCGGCTGAA	TRCN0000465861	P3H2	2386	1719	1542	1954	877	922	763	889	536	494	709	837	212	164	405	468
AAACGTCGCGTCCATGCTGTTGCC	TRCN0000465862	CALHM2	75	71	66	73	22	84	44	33	34	39	47	32	16	18	8	42
CCGTGCAACTTTGTCGACCACATC	TRCN0000465863	LMBRD1	414	366	409	255	97	128	99	189	30	103	81	44	63	0	14	25
GATATCCTGGCTTTAGGAGCGTAC	TRCN0000465864	TAGAP	2415	1713	1883	1925	775	996	847	971	540	466	813	720	47	479	235	620
CCAGCAGTGCTCGCAGGGGAAGCC	TRCN0000465866	OSBPL8	414	276	278	255	120	193	70	101	1	89	0	30	0	0	66	63
TAGGGGCTGACTTGTATCCATACG	TRCN0000465867	OGFOD2	6989	6127	6268	6272	2909	2533	2081	2709	1177	1956	1357	1155	401	1121	1331	908
TCGACCCCGAATAAACTTGGCATC	TRCN0000465868	CTTN	624	506	295	498	239	113	114	58	13	339	279	64	42	79	211	24
TGTTTAACGTTGTTGGGTCATAAC	TRCN0000465869	BTF3	1906	1600	1565	1537	476	472	439	654	399	145	425	190	125	228	239	368
TTCGCGACAAGTTCACTTTGATAA	TRCN0000465870	MYD88	3144	2680	2816	3045	854	1032	961	896	888	438	770	970	428	437	1005	508
TTAGCTCTTCTGCGATGGGTGTTT	TRCN0000465871	SCAND2P	2544	1974	2144	1947	989	1055	806	714	490	611	776	656	238	356	269	284
GTAGAGTCACTGCCTTGTCCTAGG	TRCN0000465872	MT1E	6696	5875	5323	6040	2662	2259	1746	2576	1646	1970	1365	1672	409	1224	1150	928
CCACTATTCTCGCAAAACGTTTTC	TRCN0000465874	DNAJC11	2570	2104	1707	1967	830	797	681	624	259	653	557	361	369	716	397	423
TCTCCACTCTCTTGAGCCTGCTCG	TRCN0000465875	DNAJC1	2632	2093	1798	1957	1069	784	925	695	1215	549	853	729	499	351	361	222
GATCCTCACGCCACGCATGCATTA	TRCN0000465876	KRBOX4	808	613	666	493	264	355	227	286	225	304	40	322	63	17	82	167
AACAGAGGGTGCTGCATACATATC	TRCN0000465877	GNG12	2596	1955	2016	2822	945	969	783	1158	636	1117	779	735	265	196	449	639
ACACTGGGATAATCTTGTACGCTG	TRCN0000465878	LRRK2	876	721	706	758	400	393	163	272	161	382	213	121	111	38	72	138
TGGCAACCAATAACTTGAATACAA	TRCN0000465880	SPINK7	8266	7576	7546	7040	2636	2777	2105	2324	1299	1154	2502	1354	624	756	984	1045
TGAGTTATTATACCGCAGATCAAG	TRCN0000465881	MUSTN1	3069	2470	2496	2433	1075	776	899	854	687	831	903	598	127	189	454	592
AAGGATTACATCCCCCTCATGGGT	TRCN0000465882	AHNAK2	1591	997	1176	1239	702	670	482	641	495	495	420	851	128	251	206	334
CTCAAGAGTACCAACAATTCGGTT	TRCN0000465883	GPC5	2589	2091	2281	1992	609	1020	762	704	425	437	461	836	155	119	950	307
CCGAACCATAATTAGGCGGTCATG	TRCN0000465884	LZTFL1	2562	2276	2001	1614	703	572	468	732	442	422	446	811	208	175	311	477
TCGTTTCTTTTATGTTATAGGCAA	TRCN0000465885	TMEM246	2121	1587	1522	1628	932	745	774	912	528	558	600	464	82	209	376	648
CGTACAGTGATAGGTTTCCCTCAA	TRCN0000465886	KRTCAP2	9405	9237	8692	8665	3040	2344	1927	3194	1498	1146	1732	1875	693	509	1268	1711
ACCCGATCCTGGGATTCCCTATCG	TRCN0000465887	CBFB	2610	2149	1782	2101	678	636	710	672	623	633	701	447	144	330	379	192
CATAGAGTTGCCTGGTATGAGCGT	TRCN0000465888	KIAA1456	4195	3575	3621	3988	1067	1318	1045	1386	688	997	1632	942	279	221	388	1072
AGCGACACACGAAATTTACTGCAG	TRCN0000465889	FUT2	7418	6412	5913	5953	2426	2122	1923	2026	2043	1573	1611	1574	447	571	715	872
AAGTTGCACTGGAGATTTACGACA	TRCN0000465891	KAZN	361	290	262	300	209	166	131	103	87	103	116	96	21	14	74	92
TGACTCGGTCACCGGAGAGGATTT	TRCN0000465892	PHF20L1	2278	2156	1832	1990	690	793	620	977	958	413	416	794	166	196	585	519
TTCCGCCCTGTATTCCGGTACGTC	TRCN0000465893	ENTPD2	986	707	564	743	279	386	205	268	291	140	198	205	69	41	144	155
GAATTTACCAGGTTTGATCACAAA	TRCN0000465894	HRSP12	6891	5350	2385	1640	1513	1484	1409	1531	1752	2027	2209	1530	876	1180	1369	1168
CCTGACATAGAGGTGGGACTACAG	TRCN0000465895	LOC100653061	6674	6573	6156	6188	2157	2100	1994	2373	1400	1721	1921	1343	829	881	1495	1390
TGGTACACAGTCATTTGCATACCT	TRCN0000465896	SAMD4A	4116	3620	3023	2929	1051	1188	850	1439	896	814	798	1111	418	391	671	554
CCCGCAATCACAACGATCTCAAAA	TRCN0000465897	XLOC_l2_007111	11010	10294	9988	9492	3830	3564	2481	3030	2763	2023	2849	1969	612	961	1345	1217
AACAGAGGCCCACTTTCTTTACCA	TRCN0000465898	PACSIN3	3580	2834	2557	2922	1603	1346	1425	2118	889	1279	919	1096	362	208	726	726
GAGAGTTCGCTCAGAAAAATCGGC	TRCN0000465899	LHX8	2000	1630	1699	1760	674	541	605	715	359	650	574	498	192	618	658	412
ACCTAGCCAACGACGCGGATCGTT	TRCN0000465900	TTLL2	1908	1369	1343	1887	584	564	481	584	542	272	442	491	192	177	196	70
ACACGTCCTAACCAGTCCAGGGGA	TRCN0000465901	ARG1	543	371	357	443	174	202	119	164	161	114	98	164	36	74	39	122
ACATAGTAGAATTAAACCTCGTAC	TRCN0000465902	POLR2D	2952	2385	2004	2111	1073	828	829	922	1133	766	1105	453	65	298	619	806
CATGAAACAGTCTTTCAGGAAGAT	TRCN0000465903	ATP5J	5088	4523	4075	3784	1881	1403	1219	1567	1751	1326	1230	892	360	349	412	569
AGTACCGCGTCTGTCCTGGATTCA	TRCN0000465904	MRPS36	3203	2840	2673	3120	1273	1273	948	1178	603	780	592	833	245	502	563	576
TAATCAAATAAGTATCCCCGATCA	TRCN0000465905	DIAPH1	2598	2153	2054	2304	749	961	682	682	750	805	511	728	139	326	448	391
CTATAGACTTTCTCCCTCCCAACA	TRCN0000465907	FLJ26850	4741	4352	4109	4393	2203	1716	1408	1822	857	1355	896	1062	425	720	656	436
AGTTTACCATAGGACAAGCTTTCC	TRCN0000465908	TARP	2954	2338	2667	2768	1471	1434	1313	1193	763	927	680	621	468	354	763	556
CCGATCGTATGCCCGGGCTACAGT	TRCN0000465909	GPR182	3909	3794	2828	3075	633	935	937	1069	582	1175	1270	852	479	249	321	400
CTATGCAGGCATAGCACATTAATA	TRCN0000465910	ARMCX3	633	513	282	293	136	139	94	113	63	75	180	149	214	115	76	4
AAACTTCGGATATCTATTGCGGCC	TRCN0000465911	ATP6V0D1	751	513	498	573	249	264	313	279	97	151	274	274	44	118	323	78
GTGCAGCAAGCTTCCTGAAAATCG	TRCN0000465912	NO_MATCH_212	5091	4499	4170	4828	2301	1973	1417	1602	1324	1401	1199	1180	385	515	956	672
ACTGATCCGGAGACCTCTTGCGGG	TRCN0000465913	NEK3	480	306	399	226	77	71	108	202	6	116	112	538	0	131	109	99
ACAGGCTATCTCGGTAAAGTGATA	TRCN0000465914	DCAKD	2134	1634	1765	1614	945	581	491	860	422	506	676	416	127	332	557	575
AACCGTCGGGCCCACCATGAAATT	TRCN0000465915	MAP2K2	463	353	462	364	176	288	206	182	84	358	101	228	52	9	239	147
CCATCAGTCGCCGTTGCAGCGCGC	TRCN0000465916	AMOT	1526	1183	797	958	259	260	374	276	175	142	195	251	115	109	109	86
TCTGCGTGGACTTTCAGGGTCAGA	TRCN0000465917	RAB1B	3310	2738	2447	2912	1233	1288	946	1367	1038	545	753	853	199	488	642	541
TGGCTCCTCACAGTAAGTGCAGAC	TRCN0000465918	HEXIM2	1553	1393	1314	916	458	445	595	378	208	303	126	493	107	295	290	114
TCGTATGCGATTGTTCAACGGTCC	TRCN0000465919	C12orf10	2184	1978	1593	1669	710	825	558	886	749	649	264	681	211	746	629	343
TTCCTAGGTGACGATCGTCACCGG	TRCN0000465920	NO_MATCH_290	4957	3700	3752	4275	2019	1678	1339	1899	1538	1650	1202	1554	397	573	1101	865
TGATCCCCCGCCACATTGAGGCCC	TRCN0000465921	CCNDBP1	4616	4629	3122	3154	1332	1260	1275	1618	792	621	869	818	200	420	767	495
AGGTTTCCAGATACCGCATGCTTC	TRCN0000465922	DPAGT1	217	130	242	138	24	98	74	158	84	116	32	17	0	35	70	1
CGAAAATCCCAACAAGGCAGTAGT	TRCN0000465923	STX12	4703	4374	3966	3846	1399	1099	1288	1274	1047	648	1224	675	316	210	768	1073
GTCATGGAGAAAGTCGGTGACCGG	TRCN0000465924	TUBA3D	1	5	3	2	0	4	0	0	0	0	0	0	0	0	0	0
ATATTGGCCCAATTCGGGAGCGCC	TRCN0000465925	NO_MATCH_66	1841	1484	1557	1630	807	768	724	919	615	475	891	383	145	170	343	493
TTATATACAGTCTTATCATTAACC	TRCN0000465926	PEX16	1378	976	1049	976	783	372	467	619	1085	455	375	972	32	320	488	179
TCACACCACCCTTTGCCCGGCGGT	TRCN0000465927	CNBP	344	352	425	333	193	40	113	101	10	2	146	25	17	1	57	69
CAAGTCACTTTGCCATTGTGTCTT	TRCN0000465929	NCOA5	1692	1343	1338	831	481	384	289	495	400	778	154	278	155	116	118	221
TAACAAAGATGTCATATTTCTGAA	TRCN0000465930	MOCS2	3290	2758	2399	2677	1112	1155	764	907	885	829	732	459	262	534	540	795
GTTACTGAGACAACATTACCTACC	TRCN0000465931	CPA1	1566	1198	1179	1199	646	535	597	562	698	567	611	274	59	379	195	367
GCCTATCAGACCGAAGTTGTCGTT	TRCN0000465932	IP6K2	2116	1971	1634	1612	624	625	533	583	641	374	973	525	143	268	133	133
AATGCGTTCGTGACACTTACGCCT	TRCN0000465933	PSMC4	277	190	73	129	103	105	112	105	22	49	61	106	56	18	16	131
AGGGATCCAAATCCGCCCCGTTAC	TRCN0000465934	ELAC1	1289	985	894	1160	582	484	333	307	281	478	310	289	41	296	271	115
AATAACATTAGATATCATAGTTAT	TRCN0000465935	TSPAN1	1533	1046	1351	1485	724	911	762	744	743	691	414	508	194	321	632	318
GTTTATCCTTCCCCACGTGGATCC	TRCN0000465936	HBG1	1679	1187	1377	1385	930	544	594	653	725	1169	764	716	239	200	657	715
GCGTTAGCTAGACATGACAGTTCA	TRCN0000465937	NRG4	4121	3553	3835	3302	1405	1574	1191	1475	1174	1182	879	1257	434	689	498	531
TAGTAAATATATTTCAGCAGTCTT	TRCN0000465938	BANF1	2269	1701	617	517	348	416	225	218	715	440	679	686	365	579	515	285
CCTATTAGCTTAATGCGATACTAC	TRCN0000465939	ACTR1A	2473	2180	1790	1792	809	650	789	611	726	566	502	719	98	111	369	185
GGAACCTGCACCATTTAATATTAT	TRCN0000465941	DPPA3	5227	4603	5032	4658	2131	1543	1708	1633	1369	1117	955	1602	315	1094	699	1046
TGCTTACAGAATAAAATTAACGGA	TRCN0000465942	USH1G	1431	1181	1177	1128	397	556	231	455	127	96	273	171	3	149	129	192
CAAAGTACCTTACTCCCGGAAGCT	TRCN0000465944	SPANXA1	4500	4060	3821	3963	1880	1380	1457	1192	1118	655	1062	887	316	255	882	383
CACCTTTGCATCGTAGGCATCTCC	TRCN0000465945	CXCL16	4413	4277	3719	4003	1021	1024	663	1053	784	966	529	1506	387	458	661	284
ATGACGTAGCCCATCTAACAAATT	TRCN0000465946	EVA1C	1961	1429	1335	1556	793	622	836	899	653	347	827	724	89	246	315	431
TCATCGTGGTCTTCAGCGCGGAAA	TRCN0000465947	COX6A2	9252	7824	7672	8389	3362	2543	2419	3226	2304	1450	2174	2386	651	1206	1492	1722
GCCACACCTCTAGATATCTCACAT	TRCN0000465948	ERN1	422	270	458	184	143	45	315	130	126	31	0	50	163	40	52	80
GCTCGAGCGTCCCAGCTTCGCACC	TRCN0000465949	MTMR7	538	375	269	408	188	161	91	156	44	34	174	70	22	28	14	1
TCCCAACCTTTAAGGGGCCAACAC	TRCN0000465950	PRR11	6654	5893	5377	5659	2260	2548	1900	2241	2079	1470	2009	1821	288	820	954	554
CCGCGGTTGTAGGTACATGACAAT	TRCN0000465951	PCGF1	8982	8059	7104	7441	2940	2566	2586	2702	1888	2251	2253	1788	671	1152	780	1224
ACATTAGACTGTTTTTCCGTCAAT	TRCN0000465952	SARS	1302	961	832	1157	315	518	564	318	495	529	229	287	9	206	247	218
ACACTCAGAGACAAGACAATAACC	TRCN0000465953	CCDC90B	102	111	20	95	37	8	55	46	1	0	27	0	28	28	1	56
TGTTTCGTACCTGTAGTCAACACA	TRCN0000465954	C7orf33	4785	4247	4069	3955	1650	1498	1123	1797	1441	956	887	1291	362	1104	910	572
CGAGCAGACAGACTAGGCTGCGCA	TRCN0000465955	PHF19	335	276	248	267	61	65	38	9	0	194	90	14	0	0	101	122
ATTCGAGTTTATCTAAGTTACTTA	TRCN0000465956	GCM1	62	41	39	34	25	29	28	19	0	100	11	2	33	26	0	26
ACCGGTGGACCCATCACCGCCCGA	TRCN0000465957	APOC3	10573	9076	8790	9442	4258	3345	2766	3517	3079	2143	2415	2810	564	968	2170	2107
AAGCTGAGTCGGGCCAGGGGTGCC	TRCN0000465958	PSTPIP2	1303	1006	1019	1014	489	453	508	544	316	685	290	411	115	273	503	337
GTAATTTTCATGTTATTGAATACA	TRCN0000465960	UPRT	3666	2683	2889	3041	1610	1402	1386	1634	578	1103	1221	1611	138	825	674	384
ACAAATACAGGGATTTCGTATTAG	TRCN0000465963	DAND5	52	23	19	24	22	31	39	24	31	29	61	20	8	8	5	15
AATGGTCGCTTTTGACGCGCTGGA	TRCN0000465964	PABPC5	2094	1401	1582	1752	1029	832	1004	1184	514	492	725	510	143	457	375	252
CTGTAATCCTACAAACCTTTAATC	TRCN0000465965	YTHDC1	783	554	576	506	240	73	191	181	26	122	203	60	4	0	1	6
TGCACCAAATCGTATAGACTTAAT	TRCN0000465966	HIST1H3A	2973	2563	2332	2416	993	641	628	657	639	887	903	394	270	179	314	306
ACTGAACGAAAGTCCAATTAAAAC	TRCN0000465967	NDUFAF7	1482	1200	791	1669	553	318	334	589	257	285	267	245	217	253	158	92
CAGTTTAGCAGGTGGAAATGCTTG	TRCN0000465968	SCAMP4	2131	1919	1551	1761	834	422	564	541	245	732	607	314	138	247	167	206
GCCACCGGCCCCGTCGATTCAGTA	TRCN0000465969	ACTR1B	779	639	489	485	219	204	281	236	239	166	189	175	71	85	47	235
AAATCCTAGTAACGCCCCAATATA	TRCN0000465970	RIMKLA	2122	1447	1639	1641	1041	985	1110	929	994	506	477	572	316	411	654	917
GAGTTGAACGCATTGATGTTACGC	TRCN0000465971	TMEM255A	3912	3342	2654	3094	1756	1559	1741	1623	1172	1259	1241	1073	263	537	813	748
CAGCATATCTTTGCTACCGCCCTT	TRCN0000465972	EDF1	3263	2976	2602	3123	1025	829	809	1363	605	1067	800	470	311	399	746	662
TACCAGTTAAGATGCCCATATTGT	TRCN0000465973	Tbc1d23	2243	1500	1693	1439	609	476	551	768	448	534	291	359	237	192	253	181
GGACATATCAATACCTGTCATGGC	TRCN0000465974	MAT1A	3307	2894	2346	2750	696	1335	899	891	188	733	890	610	38	333	257	310
GACACAGAGAGTCTTGACGCTATT	TRCN0000465977	IRAK4	1250	962	821	802	268	258	231	174	477	325	242	231	1	263	190	151
CCCTACCGTCAGTTCATCCGTGCG	TRCN0000465978	PHTF2	3580	3170	2540	3076	1135	1037	728	928	755	725	440	980	288	353	559	735
CATCCCAGCCAACTCTTCTTAGCA	TRCN0000465979	C1orf21	4767	4332	1994	2078	1886	1622	1447	1361	1148	1137	1380	1524	650	533	1080	920
TTCGATTTCATTAGCGTTTACTGT	TRCN0000465980	GTF2H5	2195	1904	1915	2033	897	788	888	917	745	519	575	562	36	151	651	474
AGCCATATATCGTCTATAGTGAAC	TRCN0000465981	GRPEL1	9552	7740	7497	8138	3457	3033	2459	3301	2109	1865	1875	1812	817	1463	1835	1216
TTTTGGTTGACGGAGATATTCTGT	TRCN0000465982	IWS1	3218	2413	2417	2874	1497	1365	1437	1073	1092	934	1170	736	336	482	373	708
CACGGGCCCGTCCGTGATTTCTTT	TRCN0000465983	PCDHGA9	369	312	207	218	87	201	17	83	81	4	30	0	0	18	0	30
CACCCTATCGTCGAGGTCGACTGC	TRCN0000465984	PRAMEF5	4140	3542	3710	3839	995	1188	898	1300	661	778	1180	766	521	264	482	509
GATCTTAATAGATGAAAAAGGGTT	TRCN0000465985	ASB16-AS1	1646	1142	1115	1127	447	702	392	553	396	448	487	463	255	42	332	195
TGGTCCATTAGTAAAGCCGACCCG	TRCN0000465986	AMTN	12040	11536	10126	11317	3968	3739	3404	3929	2041	3438	3160	2927	763	846	1497	1350
CAAGAGCCGTGAGACGTTCAGATC	TRCN0000465987	TBCK	1309	1168	875	1207	416	290	156	371	60	210	409	290	86	20	126	38
CCTAACGGGCAGTGTTTTATGTAT	TRCN0000465988	TBC1D7	1737	1449	1223	1140	467	252	418	565	450	306	588	136	33	215	114	316
TTATGCGAGTCGGAGAGAGTATAG	TRCN0000465989	PSMA2	4259	3569	3215	3725	1549	1786	1370	1597	1067	1178	824	886	200	575	559	836
CTTATAGGCCCCCTTGACCGTATG	TRCN0000465990	GFRA2	0	0	0	36	1	0	0	0	0	0	0	1	0	0	0	0
TCAGACGAGTGTAGCCCGCCATTG	TRCN0000465991	SCG5	4848	4242	3857	4212	1423	1661	1278	1969	1483	1030	1131	1506	550	409	1038	766
TGGTCAGGCTACGAGTATGATGCT	TRCN0000465992	Emilin1	4315	3804	3207	3207	1494	1199	817	1254	763	876	775	1002	219	557	303	200
AGCGACTTCACATGTCTCCTGTTA	TRCN0000465993	DSTN	5365	4417	4156	4783	1861	1539	1665	1602	1624	1063	1540	1239	665	455	1312	876
TCCAACACTCCGTGGGTCTAGACT	TRCN0000465995	LOC440461	2763	2436	1989	2146	773	748	468	902	532	860	414	600	164	416	619	298
CCCTCACACCACGGATTGAGCCTG	TRCN0000465996	WFDC9	3929	3963	3762	3558	1158	1113	878	1188	859	1233	646	754	108	542	229	535
AATCGATTTAACGGTTTTTATCAT	TRCN0000465997	CCL19	1285	880	1057	1210	519	510	409	583	506	580	582	3781	77	179	460	170
GAGGATGTCACACCACGATATCAT	TRCN0000465998	SLC22A11	1384	928	1126	1093	377	437	559	299	576	109	363	639	114	96	319	20
CATGGCGATGGACTCTTGTAAGTC	TRCN0000465999	HIST1H3H	3885	3583	3160	2988	1252	926	1439	1249	679	856	734	1036	157	344	645	834
TAACGGGGAACGTTCGTTGATAAT	TRCN0000466000	CSHL1	2910	2240	2170	2404	1000	966	560	1024	837	597	520	981	304	182	301	757
CAAGCATGCTGAACCCAGTTAGAA	TRCN0000466002	GPX4	2965	2585	2760	2578	1048	905	833	1061	589	588	371	507	90	167	352	213
TTTCCCTTTCAATTGTCATAACTA	TRCN0000466003	ADI1	750	592	568	581	327	222	280	268	224	251	205	448	100	113	168	107
GAAGAGGTGCTTGGTCCACTGAGC	TRCN0000466004	TXNDC12	2482	2105	1995	2220	1102	1076	754	930	613	979	692	684	286	435	329	196
CAACCGCAGTAGCTAGCACTAACG	TRCN0000466005	PCLO	3985	3522	2782	2883	943	1261	645	1045	1046	739	507	639	184	165	412	592
GGGGTGACAAGATATGCTGACTAA	TRCN0000466006	PIM1	20289	18292	27051	26055	4702	4542	3454	4317	2545	3477	4358	3569	907	1776	2184	2171
ACAACCTTGACCTCCTCTTCCTCT	TRCN0000466007	XLOC_l2_009464	1394	1183	1104	987	537	409	311	376	210	426	118	288	23	187	183	98
GCCGTCTACCAATAGACCACACTT	TRCN0000466008	MTMR11	7146	6040	5389	5602	2497	2397	1569	2187	1505	1384	1747	1574	593	760	1561	852
CCAACGCTTTGACCTTTGCAGGAG	TRCN0000466009	NCK2	1817	1706	977	1082	406	383	374	397	256	375	346	236	72	219	142	258
GCCCTAAGGACAATAGACCAGTAT	TRCN0000466010	CFLAR	3280	2704	2699	2773	1038	1108	1188	1136	1275	1082	1118	700	555	295	663	1051
GTCTACCCGGTGCTCGGTATTGGT	TRCN0000466011	CEP63	1534	977	950	1324	593	371	431	366	359	674	267	517	322	47	156	166
TCCGATCGTACTGATTTAATAAAT	TRCN0000466014	BMP4	50	33	27	20	23	0	4	22	39	39	0	0	0	0	0	0
GCAACCCGTAATCTCTTCATGTCC	TRCN0000466015	CDCA4	74	106	23	68	7	9	38	20	0	23	1	0	0	3	25	41
CTGCCGGCGTGGTCGCGCCGGGCG	TRCN0000466016	XLOC_010072	1029	882	788	698	351	295	251	337	233	276	266	147	172	54	153	93
AGACTTACAAACACAAAACACTAA	TRCN0000466017	FAM106CP	3771	2805	2461	2706	1147	996	1198	916	590	1044	781	1166	271	505	550	571
CTTTGGTCGGCTCTAATGATCAGA	TRCN0000466018	CNST	2	1	0	0	0	0	0	0	0	0	0	0	0	0	0	0
CCGATATTGTCCTTGCTTTGCCTC	TRCN0000466019	CLIC3	2642	2760	1998	2332	713	659	504	602	686	761	628	422	215	372	412	609
ACTGTCAGATTCACTGTCAACTTC	TRCN0000466020	CDKN2AIPNL	2900	2408	2509	2241	1168	1134	904	943	520	941	692	635	236	238	832	444
GCAGTCTGTATGCATTACGATCCG	TRCN0000466021	LINC01580	2368	2197	1699	2285	771	766	723	1000	293	533	637	436	144	372	202	271
TTACCAAGGATTGAGGAACCATCT	TRCN0000466022	WDR20	5196	4621	4424	5005	2556	1899	1635	1864	1635	1573	1484	1432	322	710	923	789
AACGACTCTGGGCTGACGTTGCGA	TRCN0000466023	ISL1	1223	860	563	442	439	309	560	622	260	272	337	317	161	143	187	279
AACGTCATGGCGTAACCGGCGGTC	TRCN0000466024	JUNB	783	612	439	581	271	266	215	343	229	217	192	212	120	368	149	268
AGAGCGCAATACTCACCCAACCTC	TRCN0000466025	VAMP2	9466	7972	6325	6704	3425	3022	2600	2953	2335	2604	2519	2114	527	946	1254	1151
GTGCGACGCCAGGGCGATAACCTA	TRCN0000466026	BCAS1	3822	3266	3175	3424	1315	1512	1043	1330	968	671	747	637	199	698	778	507
GTTATCCAGGCCCAACTCCCATGA	TRCN0000466027	COG8	2093	1788	1671	1932	1040	860	762	812	747	469	900	691	248	234	685	483
GAAAATACCAAAACAACTCGCCCA	TRCN0000466028	CCDC170	1122	738	872	940	576	401	238	360	93	254	514	45	84	102	85	28
TTTGCCTTAGCTTACAGAAAGGGA	TRCN0000466029	DDR1	280	209	132	246	90	164	62	68	39	92	33	79	70	1	69	47
CGAGTTCAGCGGCGGGAATCTAAT	TRCN0000466030	DOK2	3649	3094	3899	2320	890	861	716	1062	334	1369	824	422	57	457	355	788
ATCATTCTCTAGATTTTGCGCAAA	TRCN0000466031	CBLC	711	573	524	563	292	312	266	317	213	364	233	298	58	76	274	353
CCCCTTCTCACCGTGAGCAATTGG	TRCN0000466032	IDH2	2	4	3	7	0	0	0	0	0	0	0	0	0	0	0	0
TTATGATGGGTGCAAACGTCTTGT	TRCN0000466033	SLC30A4	1112	964	646	863	359	303	224	168	132	381	426	514	46	80	4	230
TTTTAACACATCTAGGCCTGTTCA	TRCN0000466034	SMPD2	959	672	548	689	431	408	265	333	371	276	332	246	107	187	272	239
ATAAGTGTGGCGTTGAGGTACCAC	TRCN0000466035	APOA2	1643	1198	1219	1357	621	806	688	702	356	351	272	274	50	161	302	231
CAACATCGGAAACCCAAACACCAT	TRCN0000466036	D2HGDH	4282	4060	3479	3387	1255	1168	1170	1064	992	1563	668	947	199	552	885	506
CTTAATCTAACAGAATCTTCCCAA	TRCN0000466037	FAM74A1	4886	4050	4611	4051	1608	1979	1348	1685	1617	1629	1149	1722	506	439	886	804
ATTACCAGCTCGCGTATTCCACGT	TRCN0000466038	LTB4R	597	521	346	411	177	236	118	204	91	85	178	148	11	45	170	38
AATCACAACTGGAGACGATCATCC	TRCN0000466039	COX20	1344	1043	1147	1139	536	560	425	617	373	636	471	299	43	107	348	356
TCGGGATGGATTTGAGCCAAAACA	TRCN0000466041	SGSH	2631	2293	2142	1978	756	964	981	681	412	972	765	732	256	173	232	321
CATTAGCAACTTTCTTTGTCCTCA	TRCN0000466042	P2RY13	6760	6004	9587	8666	2295	1896	1789	2029	1372	1889	1427	1307	351	604	837	359
TCTCGACATAGAGGAGGGGCTGAC	TRCN0000466043	PTPLB	1828	1625	1637	1688	620	628	587	884	287	687	381	472	94	205	337	175
CTACTTCAAACGACTTCGACATAT	TRCN0000466044	LRRC40	1417	960	918	1135	485	181	279	338	143	360	203	72	31	150	189	51
TTGGCCCTCATGACACCCTCCTCA	TRCN0000466045	ASIC4	1904	1269	1555	1480	727	686	657	672	218	231	690	133	209	382	265	94
GCGTACTTGTATTCTTCTACGTGG	TRCN0000466047	CMTR2	1121	798	705	661	255	194	404	541	142	199	224	296	2	87	102	145
TTTTAAGACAAAATGCATTTTCAT	TRCN0000466048	MCM5	198	96	94	86	80	190	32	46	106	12	0	38	0	0	83	20
TGCTTACCGCAAAACAGCAAGTAG	TRCN0000466049	PLEKHS1	4453	4022	3166	3766	2069	1207	1295	1349	903	775	749	695	256	301	459	448
GCTAGTAGCCCTATGTAGAGAATC	TRCN0000466050	CRYZL1	5054	4158	3859	4267	1626	1666	1330	1728	1027	889	1821	2596	530	701	1278	989
GCCTGTTACCTCATGCACACGTCT	TRCN0000466051	LINC01260	6093	5243	4970	4731	2175	1903	1277	2004	1422	1175	1139	2056	434	880	1083	1113
CCCAGCGAGCTATTGCCCAGAAGA	TRCN0000466052	TNPO2	1674	1401	1042	1408	715	405	443	548	587	157	793	231	287	62	582	84
ACTCATTGTGTTAAGAACACACCT	TRCN0000466053	Mok	1071	792	968	978	451	471	426	417	470	301	375	300	109	125	176	314
CCAACACGTTGATCTATCGAGCCC	TRCN0000466055	ZMYND19	5093	4953	3678	4470	1700	1408	1309	1465	1131	1146	1126	994	293	299	638	690
GATTGTGGGACCCCCCCAGGACAG	TRCN0000466056	CHMP3	5878	4761	4891	5167	2353	1830	1882	2500	1484	1465	1735	1383	453	1022	857	1422
TTCTCGTTTAACCGATAAAAGTGT	TRCN0000466057	TIRAP	160	107	112	143	30	60	20	90	137	153	14	57	1	1	34	21
TATAACTAACAAACAAGCTAACTT	TRCN0000466058	LOC102724334	3547	2854	2526	2878	1263	1248	1008	1047	795	796	1142	761	269	204	364	1492
ATCGGCGGCAGAAGAATAGTAGGG	TRCN0000466059	NO_MATCH_71	369	276	267	324	101	125	116	170	62	94	30	63	19	10	15	75
TAAGTCCGAGACGCCGGACTGCCA	TRCN0000466060	IRF9	126	120	144	166	60	47	45	80	64	25	33	17	1	1	69	50
CTACCCCATCTGTCTTCAGGGTTG	TRCN0000466061	SACM1L	1164	913	755	778	293	376	172	351	470	229	146	367	67	93	269	67
ACAAGAGCTTCAGTGTATAGTATA	TRCN0000466062	NO_MATCH_22	5745	4754	4833	5101	2301	1717	1736	1954	1317	1132	964	1544	305	493	1004	739
AGCAGGCTTTCTGTGCGGACCCCT	TRCN0000466063	DUSP23	3089	2260	2395	2007	979	673	685	867	598	596	553	665	339	261	431	195
AGCTAACCTTCCAGCGCCAGCCTA	TRCN0000466065	BEGAIN	3493	2457	2568	2630	809	705	521	700	396	705	699	434	36	366	440	249
CTCGATTCTATACCCGAAGACGAC	TRCN0000466066	NO_MATCH_150	4004	3485	3766	3266	1274	1555	1127	1540	894	885	1151	535	396	395	591	657
ACTCACAATAACTGGACTGTAACG	TRCN0000466067	AVPI1	4603	3625	3027	3489	1525	1522	1039	1452	1076	998	618	1093	524	527	934	1406
TTGCTTCATATCGACTCGACAAAG	TRCN0000466068	HMGB4	4222	3453	3092	3427	1409	1634	1193	1559	842	991	947	1374	486	606	671	1011
TTAGTACTATCCCTGAGCCTCTGC	TRCN0000466069	ZNF77	1097	778	565	746	143	229	174	248	279	182	113	199	178	11	74	43
CGATGCCGCGCTCGGGAAGCGGAT	TRCN0000466070	NR2C2	4373	3784	2729	3946	1138	842	996	1037	669	675	779	766	340	663	891	318
GTATGCGCAGGCTGAAACTACCAT	TRCN0000466071	CCL18	1634	1417	1342	1377	665	374	605	595	274	323	372	431	195	540	446	493
AATTCCCCCCCCAGACCGACGGGC	TRCN0000466073	FAM60A	1045	828	870	959	532	537	544	576	280	316	272	239	183	275	410	233
AAAGAAGACGGCCCAATGCCACAC	TRCN0000466074	USP8	318	177	174	212	150	78	164	278	137	37	12	174	43	18	108	29
TGGGACGTCCGGAACGTATACCTT	TRCN0000466075	LELP1	2534	2354	2082	2079	737	898	582	713	606	619	836	571	206	317	229	422
GCAAGCCGGTGCCTGTTGCCATTT	TRCN0000466076	PHYHD1	4627	4154	4122	3961	1741	2089	1267	1652	643	782	902	930	351	691	827	839
GGCCGACCGACTCGATATCAATGA	TRCN0000466077	ANKRD44	3510	3253	2375	2838	1038	1407	649	1236	1058	998	842	333	183	306	152	231
GCACGATCACTACGTGCCGCCTTG	TRCN0000466078	NAPB	1892	1621	1556	1292	599	687	566	613	428	833	737	139	109	321	205	300
TCTGGAACTAAATCTCTTCCTTCG	TRCN0000466079	NO_MATCH_260	3999	3316	2966	3177	1434	1357	1036	1235	787	1626	1671	898	441	627	910	623
AAATGAGCCCAAAGCTAGAACCAC	TRCN0000466080	DHX30	715	473	453	570	261	252	257	374	143	338	180	209	42	26	139	176
TCAGTCTGCCTCTATCAAAAATCC	TRCN0000466081	ZNF707	1955	1674	1261	1701	829	515	617	417	840	448	411	326	70	13	284	360
GGAGGCGATTGTTTTCGAACATGA	TRCN0000466082	SRPK2	1450	1125	1688	1113	541	351	219	381	244	144	417	233	56	211	256	316
GTTTGTTCTAAACATTGCGACATC	TRCN0000466083	ZNF578	452	355	202	290	125	116	203	163	152	20	202	65	1	20	45	76
ACACCCCAAGATTCCCCTAAGATG	TRCN0000466084	TBL1Y	543	390	361	490	223	160	91	223	12	34	16	41	73	11	6	60
GTGATCCAATTTTGGTTGGTCGTA	TRCN0000466085	LEP	3336	2852	2896	2925	1442	1370	1017	1180	1085	929	885	1260	358	371	561	637
GCCGATTTTAATTGGTACCCATAA	TRCN0000466086	KCTD9	928	741	804	832	267	570	252	251	151	379	297	210	154	22	123	77
GGTCCATACGCCGCTCTGTGTCCA	TRCN0000466087	TMEM14B	2322	1944	1811	1552	731	587	621	527	393	616	507	361	96	113	473	585
AATACGAAGATGTCTTTAAGGCCG	TRCN0000466088	DUSP18	2610	1898	2108	2226	1101	887	964	1089	796	862	921	828	106	270	383	355
CCTCTAGCACCTTGAGACCATTTA	TRCN0000466089	RPL27	5110	4807	4527	5062	1770	1479	1301	1586	1234	1308	766	1596	322	823	678	602
CTCTGTACCGTATTTAGTGGACCC	TRCN0000466090	PLEKHO1	77	71	101	88	52	0	16	19	0	52	0	38	0	0	25	0
CTTTGAAACAGTCTTCAAGCCCTT	TRCN0000466091	RHAG	30	14	9	0	0	0	0	2	0	0	0	0	0	0	0	0
GTCCATGTACCTGACATATATCTT	TRCN0000466092	PHF7	149	100	116	225	65	64	52	47	75	3	20	44	11	0	0	0
ACATGTGCGCCCTATACTCCACAG	TRCN0000466093	KLHL28	62	48	57	53	38	14	1	173	0	0	53	0	48	0	0	89
TATGGGCTTGTCCATTTTTCCTAA	TRCN0000466095	MOB3C	84	102	23	74	12	16	23	43	23	0	0	0	41	0	16	19
CGTCATACGCACTTCCTGAATGAG	TRCN0000466096	DEFB118	18033	17384	14889	14484	5540	5196	4080	5095	3930	3184	4530	4491	1042	1770	3026	2554
CCGGCTATGAACAGCAGTTCACGA	TRCN0000466097	KRTAP3-1	15918	15211	13196	12726	5080	5011	3832	4771	3569	3816	3428	3551	1279	1559	2485	2080
AACGCCCTCACGTCCTGCCGCATG	TRCN0000466098	CD3E	2	13	0	4	0	3	15	1	0	17	6	0	0	0	0	0
CTGACAACCTTTTAGAATTATCCT	TRCN0000466099	XLOC_l2_014048	89	76	102	90	28	21	0	12	34	40	21	24	0	2	37	12
GTTCAATGGAATACGGCATAGATC	TRCN0000466100	EPM2AIP1	2	0	0	0	0	0	0	0	0	0	0	0	0	0	0	0
TAATCCGTTCGAACCTTCCAGGAA	TRCN0000466101	RLN1	3217	2746	2764	2745	1236	873	892	1446	723	706	1232	608	332	507	732	508
GTTTTTCACCACCTTTTCAGCCAT	TRCN0000466102	Vps11	177	150	111	126	86	97	108	64	76	24	127	110	34	88	57	20
CTGTTCAATTGGTGACTAACCCAC	TRCN0000466104	ZNF280A	208	159	181	136	70	40	107	74	27	28	44	96	17	0	1	46
CAAACCGGAACACTTACATCGGCC	TRCN0000466106	LOC102725526	2019	1962	2178	1823	598	504	308	647	563	456	483	190	70	148	178	193
CTCCCGGAGGTCCTGAATAGGGAG	TRCN0000466107	RABEPK	4392	4216	3793	3765	1625	1440	1203	1566	1290	974	666	742	337	671	511	755
ACGAACCAAAATCACGATTCCGCC	TRCN0000466109	C15orf39	4747	3908	4348	4402	1775	1858	1222	1388	870	851	1497	1009	273	689	690	455
TACGGTTTCCTATGTTTGGATCTT	TRCN0000466110	RPS12	3742	3327	3250	3652	1491	1188	825	1138	785	761	1085	1371	387	299	746	1023
CATGCGACGACGTCGATGGTGAAG	TRCN0000466111	MRPL53	3226	3037	2564	2733	1144	764	1165	1204	506	654	576	792	126	601	633	598
AATTATTTCTCCATCCCTTTTCCC	TRCN0000466112	CXCL10	728	501	590	594	487	428	416	352	313	302	407	397	124	83	207	321
TCACGTTAGTCCTCGCGCCAAGAA	TRCN0000466113	M1AP	3179	2465	2558	2637	782	1032	877	1082	822	717	519	778	112	358	616	398
TAAAAATCTGTCAAGTTCTATTTC	TRCN0000466114	SERPINB8	2920	2371	2148	2775	1109	1007	869	1292	847	1297	934	877	489	186	610	800
GAACGAAATCACACAGCTCGGCAC	TRCN0000466115	CD9	2600	2217	2174	1986	834	841	507	810	660	609	935	884	331	90	375	462
ATAAACGATTCCCGTCGCCAATCG	TRCN0000466116	EDDM3A	17	28	27	37	9	35	25	12	0	2	0	3	0	0	0	19
CGATGCGGTCTTCATCTAAGGATC	TRCN0000466117	LHX6	2878	2753	2262	2333	788	693	562	473	391	1005	745	668	210	202	396	466
CTCGTATCTTTGAGGAGCTTTCAC	TRCN0000466118	SFTPA2	2251	1964	1885	1954	792	499	645	606	475	256	425	922	119	308	672	407
TTAAAGCTTTTAAGCAAGACCAGA	TRCN0000466119	NCOR1P1	1895	1559	1734	2109	1091	722	652	494	561	503	648	375	200	121	275	163
GGGGCTTTCGGATGATGAGGCCTC	TRCN0000466120	TMEM259	1484	1278	706	808	498	555	407	434	339	163	182	290	116	115	46	215
ATTAGCAACAAATTGGATAACTGA	TRCN0000466121	MEIOB	962	721	658	871	352	370	298	457	272	354	532	255	190	191	197	252
TCCATCAGAACATGCTTGACACGA	TRCN0000466122	GGACT	4683	4119	3743	4033	1885	1597	1336	1366	1236	912	973	1038	153	264	474	1082
CATAATTGTGCCATGTGGCCTGCG	TRCN0000466123	ANXA4	3629	3164	3262	2500	1306	1371	803	1000	1271	873	749	1062	233	277	743	875
CTGTTAGATAGTAGAGCTCACCTC	TRCN0000466124	NUP62	1107	793	814	778	454	299	197	410	379	674	115	76	2	2	354	4
ATCATAAACGAGCGGCCACATTTA	TRCN0000466125	ODF3L1	2562	2114	1886	2002	1034	1408	818	1164	995	544	823	739	386	475	462	420
TCGAGCCATATCGGGGGAGGTCTG	TRCN0000466126	CNOT7	5316	4597	4564	4892	2021	1985	1607	2219	952	1524	1133	957	397	757	982	849
ACTCAGTGCCGCACGCAGTATTGT	TRCN0000466127	PRPS2	2169	1782	1555	1929	810	861	724	728	753	704	321	314	198	386	467	236
GCGGCCCCGGAATTAGAATATCTA	TRCN0000466129	SARS	2489	1924	1604	1976	677	793	647	560	441	482	804	208	133	172	42	595
TAACATGCCGTAGTGTTTTGCACT	TRCN0000466130	LRIF1	3858	3144	2762	3115	1239	1145	1130	1326	740	1501	1111	1200	542	546	574	453
CACTGAACAGATATCTAGGTCAAT	TRCN0000466131	LINC00526	1171	1046	1179	965	342	257	262	269	235	339	318	102	33	144	228	290
TCATAAGCAAACAGGTTCCCACAG	TRCN0000466133	MAPK10	1586	1426	1370	1334	480	235	387	638	495	369	437	395	213	151	175	234
ATCGATAACCATCGCTTACCTGGA	TRCN0000466135	HIST1H2AC	1985	1481	1447	1528	678	793	685	664	575	485	560	490	106	208	332	269
ACATCCAACAATACTGAGCCGGCG	TRCN0000466136	KLK11	9656	7924	7882	8401	3538	3241	3104	2965	2217	2374	2267	1811	710	807	1874	1830
CCTGCTTCTCAGTGTTAGTCTTGC	TRCN0000466137	BANK1	50	21	27	17	21	0	0	5	0	0	20	0	0	0	0	0
GGGCTTTAAACGAACATAAGAATC	TRCN0000466138	UBAC2	12224	10763	10179	10147	3940	3872	3328	4404	2801	2081	2325	2784	1068	1378	1543	2241
ATCTCCTCCTTAGATACATTTTTG	TRCN0000466139	CLCN6	228	163	155	157	134	133	105	95	64	155	70	84	0	71	33	13
TAAATGCTCCGCACTTCGTAATCC	TRCN0000466140	LYN	551	336	461	470	97	179	130	91	46	113	85	104	1	42	67	19
GTACTTAGTCCGCCGTTTAACTCA	TRCN0000466141	CHRNA9	1873	1701	1593	1523	649	706	755	707	717	492	512	860	187	146	318	707
ACCGAAGAATAATCGTTTGCGATC	TRCN0000466142	UBL4A	37	42	31	13	83	0	32	8	0	0	0	0	0	29	1	1
TACGATCATACATTACCCGACAGA	TRCN0000466143	MTCH1	2744	2309	1812	2330	813	591	560	974	553	329	542	394	175	96	706	452
ATGAAGCCGCACGTCCGTAGTTCG	TRCN0000466144	CCNG1	746	521	486	578	217	271	361	369	307	184	244	213	162	81	119	38
GTACACCCTACCGTCGCATACGAC	TRCN0000466145	ARSJ	4617	4179	4443	4359	1320	1833	1365	1404	1458	1041	1848	1310	532	687	555	670
CCGCATGATGTAAAGGCAATGCTC	TRCN0000466146	C21orf91	10253	9846	8469	8383	3137	2854	2848	3637	1804	1957	2242	1504	386	992	2037	2434
AATTGTTGAGCTTCTATCTGGTTC	TRCN0000466147	C8orf31	1268	840	921	937	536	528	424	713	525	417	384	385	85	203	295	374
AGCTGGCCTTCGTTTGCCAGACCG	TRCN0000466148	GPATCH11	2018	1623	1500	1633	599	765	637	912	400	589	477	692	194	222	362	131
ACATCACGTACCTGTTAGATCTTT	TRCN0000466149	HOPX	3922	3080	3469	3173	1379	1010	910	1435	748	764	837	821	365	336	659	436
GTAATATAACCAAGGGGTTTTTTC	TRCN0000466150	UMPS	1216	945	943	1174	470	444	366	391	199	526	404	119	182	190	405	113
GATGTAGCGCAATTCGGCTTTTCA	TRCN0000466151	CHMP4C	1995	1539	713	851	410	712	627	443	645	795	446	522	117	240	313	348
CTTCTATGCACGCCGCGCGACCAG	TRCN0000466153	EPM2A	3238	2835	2757	2532	1130	1107	972	1335	781	1193	1088	845	356	269	442	628
AGAGTTTACACGCATGCCCGAGAG	TRCN0000466154	CEP72	1059	646	843	738	341	167	330	464	80	330	320	1088	145	85	266	172
GTACTTATTGAGCAGGATATCGAA	TRCN0000466155	MIR99AHG	304	224	211	210	74	41	38	158	86	0	50	101	0	53	51	71
TTATCTCGGATCAATCTTAACGGT	TRCN0000466156	NTS	2439	1817	1601	2109	831	865	627	1033	868	736	470	766	240	142	362	579
AACATCTTCCGGACGCACAACCGT	TRCN0000466157	HLA-C	1301	979	941	1206	540	571	355	578	378	567	388	444	66	196	359	233
AAACTCGCGCAGACGCCTACATTT	TRCN0000466158	SMYD4	687	452	479	505	269	252	212	280	127	146	116	177	64	54	120	283
CAACCTATACCTGGAGATCATGTT	TRCN0000466159	MTMR12	2203	1776	1473	1804	562	596	476	596	321	763	684	261	131	404	94	299
TGTTACAGCTCGACCGTCGACATC	TRCN0000466160	NPPB	7120	6367	5955	5416	2668	2279	1609	2282	1304	1769	1520	1586	424	1095	797	853
TTATGTGTTGTAGCTGGCACATAC	TRCN0000466161	FASN	1627	1079	1231	1206	535	524	377	427	366	391	178	489	82	220	238	85
GAGGAATCTTCGTGCCCGAAATAT	TRCN0000466162	ART3	1933	1562	1565	1589	687	892	1003	802	256	595	409	524	108	316	428	410
TCCGGCTGGTTATAACCAGTAAGC	TRCN0000466163	MAST1	245	187	66	112	75	15	18	40	56	0	0	0	0	0	0	0
CAGGCGTCCACGCTTTTATACCAT	TRCN0000466165	VPS33A	390	221	231	219	77	98	93	83	85	110	70	83	6	15	168	26
GCTCGGTCTAGCCGAATCGCGGCT	TRCN0000466166	EIF2B2	3732	3052	2459	2869	1233	1068	874	1181	771	922	827	431	164	345	436	324
CACCCGTGCCAGAATGCAGCTCAC	TRCN0000466167	PITPNC1	640	617	438	390	375	106	88	211	49	62	135	68	38	124	75	101
ATCAAATCTGACTGTCACGGCAGC	TRCN0000466169	PIAS1	2548	1511	1474	1894	792	679	911	905	713	479	869	718	250	537	547	627
TGGCAGACGGTATGTAAAAATCTA	TRCN0000466170	SLC24A5	5988	5490	5395	5905	2320	1771	1329	2036	766	1257	971	1301	503	525	773	552
CGATGTGCTGGCTCAGCATAACTC	TRCN0000466171	CASQ2	128	131	61	82	42	1	116	104	2	36	46	97	0	0	34	0
AAATTCCCTCGGTGTATTCAGTAG	TRCN0000466172	NOP16	30	30	27	32	7	20	30	11	19	0	2	15	0	19	0	0
AGTTAAATACTTTACTAGTAGTTC	TRCN0000466173	STARD8	212	150	83	133	30	40	131	66	75	0	116	22	2	1	41	46
GGAGAGATGACCTTCCATCATCTG	TRCN0000466174	EEF2KMT	4313	3639	3825	3136	1114	1222	1087	1218	1592	618	1346	577	297	362	805	332
GTCCTATTGGTAATCCGACCGCCA	TRCN0000466175	NEK6	637	482	467	465	236	162	216	169	63	215	283	113	103	31	199	181
TCATGGCTGACTCCCTAGAACATG	TRCN0000466176	HOXA5	1704	1303	1775	2005	1036	1026	628	981	175	736	426	456	167	393	411	337
ATCTAAACCGTCTGAATTAATACA	TRCN0000466177	CEP19	1740	1309	1490	1491	945	907	667	571	669	513	558	424	213	305	242	286
TACAGGTATGTTATAAATGTCCAC	TRCN0000466178	NO_MATCH_226	3114	2802	2453	2363	1044	1427	801	899	1397	427	782	589	157	577	599	193
GTCCGCCGTGTGTGCGCATTAACA	TRCN0000466180	SCGB1D1	3517	3049	2922	2711	1324	1071	1141	1260	638	926	961	837	328	351	596	548
AATTAGTGTGTTATCATTAAAGGT	TRCN0000466181	RPTOR	501	336	321	387	258	188	149	212	345	193	108	100	38	35	79	102
TTTTAGATCCCGGACCTCACGACG	TRCN0000466182	LSM3	1383	1095	1108	1218	790	598	609	751	395	480	402	679	172	363	319	148
TGACACACAATCGTTTTGTGCCAA	TRCN0000466183	S100A4	3733	3266	3061	2859	1145	814	797	1015	792	317	912	730	212	466	318	549
CGATGGCCATGGACCAACTATTAC	TRCN0000466184	C5orf60	19	17	8	111	2	3	0	3	0	0	0	10	0	0	41	91
TTCACTGGCTGTTGGCTATTATTA	TRCN0000466185	C4orf33	2324	1927	2047	1770	926	785	881	914	657	388	701	461	294	229	398	482
GTGGGGAATAAAGAACGGCAATAT	TRCN0000466186	SSBP3	3046	2753	1533	1867	980	1314	977	828	925	1008	1022	890	201	558	500	350
CCCAGTATCTGGCGTCAGATTGTC	TRCN0000466188	CCDC47	2997	2669	2348	2884	870	938	578	1050	920	581	717	2209	167	126	290	447
CAATCCGTACGGGATTATAAGATA	TRCN0000466189	SPCS1	4990	4521	4135	4360	1446	1374	1381	1731	1085	893	1304	1435	677	425	579	1178
CGGCAACGCCTTATGATCCTCGCA	TRCN0000466190	NDUFB3	7052	6191	5687	6049	2125	1976	1741	2132	1243	1665	1371	1004	408	744	823	818
GATACAAGTAGCGGCCGGCTATGC	TRCN0000466191	HMGN3	2166	1810	1860	1766	669	567	584	658	722	808	851	985	107	195	413	269
TCGATCCAGTTAACCTTACAAGCG	TRCN0000466192	PAPSS2	889	688	823	932	304	281	273	329	227	102	145	218	34	37	72	134
TTTCGGACACACCTGAGTGTAAGC	TRCN0000466193	MND1	2729	2241	2242	2064	1037	1015	956	1281	1030	481	1070	641	222	377	510	317
TCCCGTCAACCGGTGAGCTGGTCA	TRCN0000466194	LRRC28	1420	1174	835	1297	481	342	409	486	462	400	298	380	62	59	113	214
TACCCTATTAGCATTCAATTGTTA	TRCN0000466195	COX7B2	1772	1541	1256	1001	421	446	413	479	292	383	277	566	259	282	328	401
GGCTCTGGCGATGTGCTTTCTCCA	TRCN0000466196	YIPF4	9274	8595	7866	8047	3512	3108	3371	3065	1488	1609	1959	2146	750	676	1679	1303
GTTTCGTTATTGTGGGATGTGTTC	TRCN0000466197	NME5	43	44	53	54	11	5	14	56	131	7	13	1	17	0	2	44
GGTGCGGTTGAAACCACCAGGACC	TRCN0000466198	BHMT	259	308	219	284	48	88	141	60	123	41	0	103	8	33	82	123
GAATTTGCATACAAAGTAATAGGC	TRCN0000466199	RPL23A	1548	1220	1102	1239	648	494	418	390	687	386	394	637	243	287	301	194
TACCAGCGCGTTCGAGTTAACAGT	TRCN0000466200	ZP2	6157	4758	4978	5127	1820	1789	1806	1862	1241	1443	1538	512	323	756	647	612
GCCCTATTCCCGCCCCAGGGAGTT	TRCN0000466201	KDELR3	3273	2793	2312	2531	1210	1081	1061	1113	615	1089	458	598	451	241	339	602
GCGCCAGCAGAACTCCAGTGTGGT	TRCN0000466202	ITIH3	3703	2869	2373	2688	1080	1556	1245	1071	472	707	605	378	300	314	659	210
AGATCGAGCGTACGCGCATGTCTC	TRCN0000466203	ATP6V0A4	332	231	176	303	74	216	10	93	42	75	89	94	1	66	78	17
CTTAAACAGTACTTCGGATAGCAA	TRCN0000466204	CD24	1180	947	911	798	357	235	337	321	718	168	185	184	35	202	84	281
TTTTTTTAATATGCCATAACCCTT	TRCN0000466205	PLSCR4	1205	790	887	1037	604	780	787	733	558	517	502	916	155	247	429	419
CTACACTCGTTGTGTCCGATGGTT	TRCN0000466206	SLC12A7	2413	2047	1924	1982	752	582	629	799	494	972	504	595	110	248	287	761
CTGCAGCACCGGACATATTGTTTC	TRCN0000466207	GLRX2	12411	11370	10410	11209	4541	4257	3235	3741	3276	2844	2932	2793	1397	1146	2300	1430
AATCAACGCCCTTTTACGAGTGAT	TRCN0000466208	NO_MATCH_17	1679	1295	1516	1441	657	683	506	691	514	482	556	614	85	376	400	391
CGCTTCAATAAGAATATAATTACG	TRCN0000466211	VPS52	105	72	73	66	1	0	67	23	0	15	16	0	0	1	0	0
AGTGAGTCAATGAGACGGGGGCCC	TRCN0000466212	PRAC1	6369	5354	5355	5096	2264	2262	2163	2384	2055	2350	1713	1537	506	774	1384	1705
TTGAAGAAATGTACTAGGCACCAT	TRCN0000466213	TMEM71	4509	3808	3509	4204	1870	2210	1474	2027	1449	1351	1368	1395	468	849	1305	974
AGATGCAGCCAGCTGGGCCCCCCA	TRCN0000466214	NO_MATCH_48	1156	740	747	876	445	431	220	302	208	154	41	82	174	80	179	44
GCTCTTAGGGGTGCTCGAGCATGC	TRCN0000466215	ATAD2	1156	984	917	839	373	523	275	453	357	513	465	269	48	140	115	190
TTTGGCACTTAACCACGTTTAGTC	TRCN0000466216	P2RY11	3490	2832	2723	2807	1442	1464	1296	1339	1117	1371	922	1088	344	433	649	640
GAATTAGTACTTTCTCCACGCAGC	TRCN0000466217	TSR2	2624	2027	1925	2287	1267	1215	1068	1047	956	635	550	1072	213	360	484	523
TTCTTAGGTGGAGGGTGAGCGTAC	TRCN0000466218	NECAB1	1607	1165	1272	1446	714	654	537	574	321	448	493	326	55	238	213	307
GCATTGATCAACGAAACTATTGGT	TRCN0000466219	FAM198B	6644	6000	5520	5941	2250	1896	1809	2665	1499	1667	1864	1756	476	897	729	1154
TGTGCAATCAGTTCCAGCAAAACG	TRCN0000466220	LOC148413	7266	6729	6170	6570	2232	2044	1903	2030	2057	1867	1327	1290	654	890	915	1177
GCACCCTCTATACCCCATTCGTTC	TRCN0000466221	TMEM56	5383	4879	4409	4593	1966	1917	1594	2067	847	1495	1335	1583	836	513	1464	860
TGGTCTTCTAATGAAACATTTGTA	TRCN0000466222	KIRREL2	3227	2939	2482	2887	741	1024	917	1146	859	848	739	1015	13	472	400	354
ACCATACTTGTCTATGTCGTCGGC	TRCN0000466223	MAP3K12	2693	1876	1867	2431	698	810	514	688	333	895	257	514	112	138	205	457
ATCAACAAAAATTCCGAGTTCCGG	TRCN0000466224	BOC	3231	2436	2545	2785	1461	1220	1137	1155	747	1001	876	637	442	370	561	645
ATCAGTCGAGCGAATATAACCAGT	TRCN0000466226	ATP6V1B2	1059	683	688	749	391	532	326	476	772	138	307	321	106	124	311	267
AACGACGGACCCCAGCCTTACCGC	TRCN0000466227	RBM42	1020	773	752	895	271	341	289	288	329	458	267	253	9	147	99	226
AGCATGCCTTTTACGACAAGATGG	TRCN0000466228	HTR1D	3580	3134	6860	6768	1117	1216	1072	1078	562	901	987	346	402	369	195	646
TTTTAGATGAATATAGTTATATCC	TRCN0000466229	TTC33	1634	1121	1210	1216	705	758	640	861	487	263	382	379	156	207	501	284
ATAACCAATGATTTCCGACAGATT	TRCN0000466230	SRSF12	1806	1358	1039	1310	566	587	408	487	372	439	349	508	166	242	392	463
GACTTACACAGACTGATTATAATA	TRCN0000466231	ST6GALNAC5	2236	1767	1937	1895	819	816	688	723	602	957	930	650	292	426	461	596
TCAATGTACTGGCAAAGTAGGCAC	TRCN0000466232	FKBP6	2705	2352	2351	2441	790	904	778	1217	783	840	612	341	121	653	379	243
TACTGGCTAAGTCGATTACAATAA	TRCN0000466233	CPLX4	4331	3479	3508	3518	1379	1297	1025	1480	1126	1341	895	1218	450	483	454	828
ATCTCTCTCTTAATCTTGACACCA	TRCN0000466234	CALCA	1542	1099	1151	1443	849	716	718	574	568	666	411	417	119	163	320	409
TGCCGGTGGAACGACGATTACGGG	TRCN0000466235	SCLT1	5988	5892	5374	5124	1778	1575	1313	2188	1196	1614	1452	1520	252	513	919	484
ACTTAGTCACAGATACCTCCGCAC	TRCN0000466236	HMCES	4537	3387	3324	3634	1735	1709	1934	1857	1016	1023	1163	8032	371	571	1076	1315
TGTGTTGAGTGGGGTGATATCGAA	TRCN0000466237	GOLM1	214	139	144	103	80	4	30	77	2	0	0	0	1	1	140	34
GTTTAAAGCTGATCCAAGAAACAT	TRCN0000466238	RQCD1	60	51	33	84	20	5	31	56	83	65	0	0	0	11	0	0
GCACCCCATCATGTAGGAATTACG	TRCN0000466239	GRIA2	343	276	266	150	48	162	63	127	9	95	23	187	82	1	59	20
CGATCTCTAGCACTTTTATGGGCT	TRCN0000466241	XLOC_010651	3428	2991	2325	2222	1258	997	723	704	687	642	572	468	246	326	218	218
TAGCCGCAGAATAACATTGTTGTC	TRCN0000466242	SMAGP	9138	7930	7035	6799	2927	2268	2569	2613	3194	2197	1873	1795	634	576	1100	1054
TGTTCACGTTGGCAGACCGGAAGA	TRCN0000466243	BRPF3	2027	1405	1591	1105	480	620	390	477	334	417	709	414	98	245	227	185
CTGTGTTCAAGGTTCAGCAGTGAT	TRCN0000466244	INTU	8272	5890	6851	6544	2660	3390	2795	3148	1687	1518	1788	1228	1003	1196	1150	1232
CGTGGCCCCGGAGCGGCTAATTGG	TRCN0000466245	NEUROG3	6372	5874	2046	2392	1637	1609	1115	1407	1611	1717	2010	1311	462	809	1284	803
TACACAGCTGCCGTAAATGCAGAT	TRCN0000466246	GALNT2	105	61	73	6	50	5	3	9	0	0	0	0	0	0	0	0
ATCAGCAGGTCACACTGTTGAGTG	TRCN0000466247	NBPF3	2226	1870	1684	1711	945	714	733	669	688	594	663	336	116	267	411	470
ATTTCCTGCGCAACTCTCGGAACC	TRCN0000466248	GPS2	140	100	100	115	50	51	119	72	15	112	64	59	4	32	71	36
TATAGTCATACGTCTCGCGCGTCA	TRCN0000466249	IDS	5048	4097	3643	3978	2272	2063	1512	1859	1810	1190	1039	771	433	597	814	970
TAACCGCTTATCTCAGGCCCCCAT	TRCN0000466250	SERPINA1	5493	4478	4733	4481	1783	1784	1774	1609	1819	1312	1275	1000	611	693	870	837
ACCCCGAATGCTCAGGTGATCTTA	TRCN0000466251	C16orf72	2055	1642	1217	1535	475	481	367	643	648	882	560	602	46	208	183	266
AACGCGGCGTAGACCCCGGAAGCT	TRCN0000466252	SERPINB6	1845	1450	1229	1637	716	874	541	891	677	391	463	461	191	218	338	387
CAACTTTTACGTTTGTATGGATCT	TRCN0000466253	TMEM100	3529	3130	2678	2827	1299	948	1119	1027	793	834	965	960	434	408	266	409
GTGGTTTGCAATCGTTCGATCATA	TRCN0000466255	ZNF521	2424	1885	1698	1935	826	1227	841	769	850	543	469	504	189	394	569	624
AGAATTAAGGAGCTCTCTAGTAAC	TRCN0000466257	CLCN4	741	580	704	837	266	294	234	206	308	224	86	99	45	3	59	270
TGGCTGTGACAGCTATGTGAAGCG	TRCN0000466258	FLJ33534	2109	1977	1940	1936	682	504	349	596	518	472	540	292	62	155	106	24
TGCTCATTAACCGAGATGTATATA	TRCN0000466259	XLOC_013643	3556	3138	3123	2928	1164	945	820	1176	922	498	804	717	232	147	465	154
ACAACACCCACTGATGGAATCTCC	TRCN0000466260	PHF6	4310	3748	3631	3618	1571	1625	1374	1696	914	1086	855	900	220	410	437	561
CCATGCGCAATTCTGTAATAGGCG	TRCN0000466261	LCN6	3988	3525	3213	3309	1027	885	870	1110	1273	998	939	421	267	425	476	354
AGGCACCTAGTCAATTGGCTGAAC	TRCN0000466262	CCDC60	1491	1030	1258	1118	458	801	320	497	96	298	300	236	3	135	311	477
GTCGTATTTAGCCCTAATACTCGG	TRCN0000466263	GAGE1	3161	2561	2566	2659	1255	1098	1131	1038	724	997	637	677	209	577	1067	775
GACTTCAAATAAATAGCTTCACTC	TRCN0000466264	TUBA1A	3417	2496	2270	2529	1050	1108	1059	1436	881	1535	952	983	311	466	823	722
GTAAGGTTTGTACATCATTCAATA	TRCN0000466265	HERPUD2	2513	2167	1677	2175	1170	641	670	977	705	752	568	641	137	554	429	275
CATTGAATCTTCATGTCCCACCAG	TRCN0000466266	ACKR2	4139	3935	3333	3551	1492	1123	1032	1471	980	1521	1206	1218	439	350	796	842
GAATAATCCGTTCCGCGCGCTTAT	TRCN0000466267	MRPL23	2009	1370	1373	1621	775	560	536	779	316	289	1311	392	281	120	189	343
GGCCCTATAACGGGCCCAATGTCC	TRCN0000466268	PCCB	755	480	516	606	409	504	316	257	295	237	297	497	171	53	112	146
CAATTACCCGTTGGCGTTACTGCA	TRCN0000466269	OGFR	1029	751	355	541	206	161	139	217	110	48	220	26	44	3	332	90
TGATTATCATCGAGACCCGACAGC	TRCN0000466270	MAP7	51	36	54	23	9	8	0	1	0	0	0	0	0	0	0	0
TAGGAATTCTAGGAGGTCCACTAG	TRCN0000466271	KRTAP10-1	11423	9732	8618	8524	4087	4149	3662	4684	2732	3530	3747	2295	980	1397	2065	1793
ATCTTCTCATTATAATACCATTGG	TRCN0000466272	CRCT1	3423	2437	2834	2950	1601	1619	1523	1379	1437	1177	1285	1220	425	555	713	812
GTGCAGATCGGTCTCTATCGGCTT	TRCN0000466273	ZNF484	725	395	374	324	142	224	116	145	168	73	92	79	1	105	48	35
GCACAGGACATCCCGTTACCTTTA	TRCN0000466274	FAM160B2	650	548	657	531	208	197	206	243	209	16	127	122	95	56	30	106
GACAACTTTTGTCCTCCGTTCTGC	TRCN0000466275	SMCO4	1758	1598	1341	1736	772	776	602	676	446	251	862	276	256	299	278	173
TCAATTGTATCAAAAATTAAGTCA	TRCN0000466276	Epb4.1l4a	2295	1907	1986	1745	1071	785	591	1052	830	437	426	852	186	450	330	222
ACCACGTATTGTGGCGGGGTTCAA	TRCN0000466277	THAP4	347	289	310	162	82	86	97	151	82	67	76	90	23	67	44	41
TCGTCGCATGACCCCCTGATAATT	TRCN0000466278	RCN1	1056	864	840	771	343	365	345	293	307	222	340	315	23	122	169	138
ACCACACCCAGACGTTCCTTTATC	TRCN0000466279	TFIP11	890	724	521	735	151	375	203	297	333	124	142	59	64	165	70	183
AAAATAGAGTATAACAAAGCAATT	TRCN0000466280	LZTS2	68	46	91	61	22	77	34	85	6	0	93	19	31	1	0	48
ATGCGAGTTTAAATCCTACAAGTC	TRCN0000466282	CALHM3	1435	1059	1039	1005	665	529	501	610	479	344	212	595	193	205	104	200
ATCAGTCGGTATACTGACAGGAAT	TRCN0000466283	DHX29	9	2	0	0	8	5	0	0	0	0	0	0	1	0	0	0
TTCCCATGAGACACGCAACATGTA	TRCN0000466284	SYT1	3385	2753	2617	2760	1122	968	1026	1187	633	855	569	726	394	382	359	402
TGCTGCTAACGTGGTAAGAACGAG	TRCN0000466286	SERPINF1	3474	2983	2650	2998	751	1202	1024	942	638	709	824	644	137	328	1049	342
GAAACGCCTGAGTCGGACGTTTTA	TRCN0000466287	MKS1	2047	1722	1821	1530	809	778	653	840	657	586	631	367	84	322	417	679
AAGTCCGCGGCTTAGCAAAGCCGG	TRCN0000466288	EWSR1	1340	1010	1332	1259	593	564	618	805	578	438	488	437	312	220	348	230
GTAGTCCGCGCCAGGCCCGACATG	TRCN0000466289	JMJD1C-AS1	2	2	0	0	0	0	0	0	0	0	0	0	0	0	0	0
ACTAATTGATGGCGTAAGAATCCG	TRCN0000466291	DYNC1I1	1389	914	1059	1145	286	383	459	438	492	633	383	488	90	184	133	431
CTATCTGCAGCAGGGTTCGCCTAG	TRCN0000466292	ALDOC	3159	2790	2364	2480	954	1521	824	950	652	602	1219	922	357	416	671	460
TCCCCAGATCCGTAGGAGGAGATA	TRCN0000466293	PDCD1LG2	3329	3080	2657	3194	1254	1248	1335	1211	1233	466	496	719	276	219	196	412
TGCATTCGATCGACAGGTTTTAAA	TRCN0000466294	CDC42SE2	1696	1372	729	874	363	185	170	357	354	333	275	693	101	30	48	134
TGCCTTCATATACCCTGATGACTT	TRCN0000466295	FUK	160	149	116	81	61	35	8	80	42	0	0	0	0	0	0	0
GTTGCAAGGTCCCATCCCTAGGTC	TRCN0000466296	SHD	1212	1011	875	1188	486	376	393	436	255	160	267	402	106	224	98	304
ATAAGGGATATTGAACAACTGAAC	TRCN0000466297	BTF3	2087	1740	1539	1855	772	861	571	746	453	669	780	545	301	411	685	281
ATGGATTAGCTTCGCTAACGGTTA	TRCN0000466298	TSEN54	705	551	526	550	329	279	176	223	175	190	195	94	10	69	194	99
GCGAATTAGCAAAAGAGCGTCGAG	TRCN0000466299	ATRNL1	742	593	612	419	305	119	182	442	116	38	57	172	43	37	122	142
CGGCAGCAAGTCATAGCTCGCCGG	TRCN0000466300	DCBLD2	1602	1112	876	952	444	495	461	447	460	383	105	106	115	81	662	97
CAAAGGACAATTCCCCTACTCTTT	TRCN0000466301	CDC42EP4	3978	3523	2474	2139	1244	781	986	1044	1135	807	884	575	68	365	852	289
ACAATTATCATTACTCACCGTGAG	TRCN0000466303	TRIM31	4907	4210	4462	4426	2129	1805	1977	1964	1577	1692	1313	1081	339	883	1263	661
TGCATCGCAGTTCCCCTTGCGCGT	TRCN0000466304	LRRFIP1	5605	5339	4722	4959	1697	1581	1223	1765	1566	932	1167	887	317	420	543	688
CGATAGACTCGCTCTCTATTGGCC	TRCN0000466305	ARSG	1390	1130	872	828	352	212	196	188	106	93	465	73	2	230	79	105
CTAATCTCCCGAAAGCCTCATTGA	TRCN0000466306	PIP4K2C	2403	2026	1637	2033	728	752	802	750	427	624	277	357	299	202	268	629
AACGCATCCACTATATGTGTCCCA	TRCN0000466307	DTYMK	1054	931	850	943	385	358	401	448	338	368	362	227	57	137	549	114
TGTTCCGATGTAGGCGTAGCGGGT	TRCN0000466309	RPL14	1865	1778	1575	1278	911	489	533	481	288	598	124	151	84	92	309	190
ATCCCTACTCATTCACACTAAGCT	TRCN0000466310	RAB17	2942	2147	2296	2517	978	1053	999	1152	1151	1036	772	1001	357	406	625	762
AGTAAACGTTTAATAATTGCACTC	TRCN0000466311	IL20	2294	1795	1918	2449	925	920	811	630	427	518	577	1000	223	196	316	384
GGGAGGACGGGTCATTGCGTAGCG	TRCN0000466312	CRCP	4356	3759	3789	3642	1396	922	1069	1541	1072	1153	958	1099	322	224	488	349
TTCGTATGTTCCAAAAAACCTTCT	TRCN0000466314	IFI16	1088	694	797	945	313	486	323	480	456	215	224	463	135	40	242	407
TCTCCCTCGCTCACAACAGAAACA	TRCN0000466316	PEX11G	9026	7655	6814	6899	3192	2570	2946	2477	1748	1794	10443	2491	605	837	1479	1643
GGGCATCTCTCTGCAGTCTTGACA	TRCN0000466317	C6orf203	10829	9713	8216	9254	3479	3485	2792	3761	3183	2773	2560	2727	546	926	964	1179
GGTACTTTGACGCCGCGTTAGGAC	TRCN0000466318	PRPF40A	6346	5418	4457	5061	2505	2092	1642	1932	1057	1851	1550	1690	836	1282	708	1100
GCTCTTGCTCTGCGATCATTGGTA	TRCN0000466319	KPNA2	744	608	476	534	451	165	226	297	329	193	360	285	166	276	267	177
CGGCAACGTTTCCTCTTTTCCCAT	TRCN0000466320	ELP2	7	3	0	37	0	0	0	0	0	0	0	0	0	0	0	0
TGTCTCCACTTATTGAAGGTCAAG	TRCN0000466321	NDUFS3	145	111	258	89	18	35	62	58	0	0	0	29	0	0	122	0
CGCACACTCACTTAATCGTGGATC	TRCN0000466322	PCDHGA5	1090	779	994	846	159	401	263	277	142	109	50	100	37	20	101	0
GTATGATCAATTGCGAAGATATGC	TRCN0000466323	NO_MATCH_208	6665	5363	5667	5692	2329	2296	2446	2697	1810	2079	1944	1850	643	1054	1054	1368
CACGGACAGTCGCTCTGTAAGGGC	TRCN0000466325	MAP4K3	1802	1761	1595	1778	463	421	653	525	474	595	238	359	76	168	350	343
AAAATCACCTATTCTTTGCGCTCG	TRCN0000466326	LAMP5	266	199	178	204	137	168	134	116	101	10	114	159	14	57	96	38
CTTCTATGCCATAGGGAACGGAGT	TRCN0000466327	RNF144A	1869	1589	1798	1251	759	663	621	560	524	634	332	701	214	229	306	406
AACATCCTAACTACGGTTTCCGAG	TRCN0000466328	PEMT	675	533	529	534	230	235	351	184	450	85	249	202	106	192	105	243
CAAGTTTAACCACGTTAGCTCTGC	TRCN0000466329	CYP2J2	3636	2796	3317	2577	1068	1019	1395	1203	921	527	631	365	482	268	352	452
TCACCGTCTCGAGAAGACCACTGA	TRCN0000466330	PDLIM7	4110	3648	2995	3293	1442	1322	1159	1489	842	864	965	1082	299	370	393	637
ATGGCGATGTCGCCTTACTAGACT	TRCN0000466331	C10orf54	3161	2349	3120	3943	854	1034	1046	835	1068	1284	955	1088	195	356	571	648
TAGGTTGCAGCCCCCAGTGCCACG	TRCN0000466332	QPRT	6870	6045	5246	5546	2333	2049	2031	2504	1871	1901	1469	1749	528	879	950	1211
TGGGGTTTAATTGCATTCTTGTTA	TRCN0000466333	HIST1H2AG	4739	4378	3147	3827	1317	1269	1064	1082	1776	1041	938	444	320	182	354	1114
TCCTCCAGAACTTACTGAGGACAC	TRCN0000466334	MMP10	3782	3172	3042	3305	1243	1257	1016	1474	1027	1887	826	1028	330	533	392	445
AGATTATGACGAGTAGCCTTGCAA	TRCN0000466336	VAMP3	3304	2581	3015	3068	1530	1544	1155	1481	1199	991	584	926	318	958	687	458
GGTCCACCCAGTTCAATATTGTTG	TRCN0000466337	RNF133	2789	2445	2196	2872	796	713	941	973	783	379	582	1056	359	378	285	567
TTCTTCGAGTTTGTCCCAAGCACA	TRCN0000466338	XLOC_l2_005179	1537	1198	870	1259	524	616	435	719	489	382	490	533	100	110	393	226
AGCCGATGTTGGCGCCACTGGTCA	TRCN0000466340	FBXW12	2757	2046	1792	2020	868	1055	767	988	432	662	1032	437	79	282	364	273
AGCACCTTTCGTAAGCCTAGTAAC	TRCN0000466341	CCHCR1	711	505	468	578	236	103	207	191	105	161	228	300	2	3	69	76
ATGTCCCGGCCCCCCTTAATCACA	TRCN0000466342	FHL2	1419	1093	1037	1111	656	473	559	604	466	630	402	415	156	253	281	340
ATACCCAGAGCCGAATTACCGTCC	TRCN0000466343	ZMAT2	2592	2077	1957	2124	829	864	889	1050	873	606	963	669	172	213	762	402
TAAGTATACCTCGAAAATATCCGC	TRCN0000466344	NO_MATCH_223	3776	2981	3352	3031	1394	1417	936	1414	1086	777	1236	597	288	322	498	501
CGCAGGAGGCATCCGCAAAATCTA	TRCN0000466345	RAB40B	4741	4799	3769	3708	1331	957	1406	1333	426	1131	795	1281	406	296	717	202
AACTACCTCTTCTATCTATCTCAT	TRCN0000466346	TRMT61B	465	306	239	379	200	245	119	204	122	131	238	212	80	15	214	131
TTATATGGTATAACTAGCCCGCGC	TRCN0000466347	C1orf109	3299	2562	2624	2782	1317	1050	1310	1236	1041	916	988	690	377	309	825	458
ACCGAATTAGGCCTTTTTCGACCC	TRCN0000466348	GLYCTK	1560	1170	955	1045	671	624	593	487	207	856	417	92	115	52	333	177
TACCTGATAATGGCACCATGCAAA	TRCN0000466349	DEFB129	4404	3767	3607	3885	1760	1399	1141	1763	1248	1286	1168	898	275	217	432	928
AGCACCGTACTCTTATGAAATACT	TRCN0000466350	EMC3	4763	3993	3608	4128	1758	1571	1269	1685	787	949	924	893	245	441	858	682
CCCACTCAGCCTAGGTGTAGATCA	TRCN0000466353	SKP1	291	288	177	283	62	87	48	81	9	115	0	52	23	9	112	85
TTCTAACCCCTTTGTAGACCAATG	TRCN0000466355	HIST2H2BF	6546	5130	5152	5694	2801	2471	2311	2575	2130	1900	2441	2335	705	906	1353	1134
GTAGACCCTATCTTCCATAATCCG	TRCN0000466356	CABP7	1376	1222	1380	1247	595	759	459	440	210	277	385	328	104	260	176	145
ACGACATTCAAGTGTACCCTATGC	TRCN0000466357	UCP2	2023	1858	1578	1909	689	690	510	747	445	494	639	940	206	157	436	378
AGGTGGTACATCCGCCGCACTACC	TRCN0000466358	GDE1	2234	1967	1784	1811	875	798	476	919	682	363	468	338	11	321	134	334
ATCCGAGGGCGAACACCGCACGGC	TRCN0000466359	ZNF473	427	236	235	229	82	104	133	104	143	60	85	80	15	65	38	13
AACACTTTGTTCCTTAGACAGTAA	TRCN0000466360	RPN1	720	495	810	630	469	257	334	340	168	98	96	394	50	149	206	394
CATATCCCTGTTCATGTATCTACT	TRCN0000466361	PINX1	1696	1376	1225	1213	587	374	359	317	158	473	235	428	52	205	166	166
CTCCACGGCACCAAGATTTTCTAG	TRCN0000466362	SLC1A7	5782	5704	4499	5181	2024	2269	1865	1965	1184	1174	1191	1075	482	647	778	1292
CCTGGGTTTACAGATGTGGCTTAC	TRCN0000466363	ARAF	1684	1375	1462	1590	461	261	318	327	476	330	579	231	85	242	259	153
TTAGGTTTCCAGCGTTGTGTGGTT	TRCN0000466364	Rbm5	2961	2200	2447	2763	1106	680	933	1094	928	1006	816	945	295	569	295	444
TCGCTTATATTCATGCGACGACGA	TRCN0000466365	CPB2	4106	3197	3197	3487	1519	1265	1581	1410	794	1269	1150	922	446	470	549	340
ATTATTCCTATCCGAAATTATCGA	TRCN0000466366	KMO	1014	672	684	729	479	483	457	545	434	655	301	319	96	119	403	281
TTTCTAATATATTCGTGTACGTCC	TRCN0000466367	ERCC2	1691	1062	1396	1275	634	693	598	666	760	1164	450	557	101	206	358	461
GCCCGCTCTGTAGTCCCCTGTTCG	TRCN0000466368	TAS2R43	772	632	468	607	340	144	177	251	83	118	130	97	28	54	29	12
CAAGTAGTGCTATACTTATTTTTT	TRCN0000466369	KAZN	2463	2194	2220	1648	776	475	769	772	809	619	414	552	108	125	182	887
CAGCCAGTACCTGTGCTGATGCGT	TRCN0000466371	RNF214	1187	973	723	954	371	280	220	245	272	200	195	86	114	129	188	122
CGACGTAGGTTATGCAGATCAGCA	TRCN0000466372	SLC41A3	3501	3341	2680	2818	1067	1005	835	1025	817	554	479	369	204	305	1351	357
TGCGCTAGCTCGGAATTCCATATT	TRCN0000466373	PIGO	3105	2643	2305	2232	850	909	912	758	1190	712	779	408	127	44	149	515
TAAGCGAGCACCTAGCTCAGCAGC	TRCN0000466374	MRPS34	1994	1621	1578	1477	631	678	503	652	350	387	252	419	164	171	348	232
TCTCACCGTAGCTGACGCTTGGAT	TRCN0000466375	NO_MATCH_253	1127	997	834	1034	510	232	324	266	509	200	407	436	162	122	155	154
ATGGGATTTGGGGATCTCGTGGGG	TRCN0000466376	ESAM	1515	1036	616	917	421	499	496	638	738	337	698	534	144	229	302	307
TGATTTCAACACTTCATTTTCAGG	TRCN0000466378	ZNF562	2288	1879	1376	2293	608	589	815	616	243	345	556	508	426	321	752	150
TATTTTGTACGAACGAAAATCAGA	TRCN0000466379	CLEC11A	2190	1487	1517	1594	576	522	525	506	322	783	363	398	192	547	201	159
TGAATAAAGTGCCTTTAGTGCACG	TRCN0000466380	ETV7	3784	3214	2875	3213	1092	1120	816	1315	1854	415	997	888	221	283	522	740
ACCCGAATTGGCAACAGCGTTTCA	TRCN0000466381	ZNF776	9497	8353	7835	9287	3473	3715	2614	3069	1886	2586	1821	1804	608	1177	1163	960
ACTACCCGATGGAAACATAATCTC	TRCN0000466382	ZNF75A	4884	4035	4019	4231	1574	1692	1311	1857	1084	976	1476	1169	410	461	400	617
GCGGTCAGTCATATGCATCAAGCC	TRCN0000466383	LURAP1L	5714	5385	5006	5345	1741	2280	1879	1927	1327	1263	1549	1391	716	618	1258	1002
ATCACAGACGATGAGCTCGGCGGG	TRCN0000466384	NFYB	3670	3073	2383	2708	964	1016	768	808	969	855	842	1219	249	433	698	662
CTTCCCTGGATGTTGGCCAAGCCC	TRCN0000466385	QSOX1	1170	854	504	409	253	260	194	221	408	137	431	313	199	201	209	302
TGGGCATATTGCTTGCTGACCTTC	TRCN0000466386	FAM126B	3330	2568	2684	2659	1106	774	888	716	661	650	492	490	400	434	184	482
CTCATTATCTAAGCCTCTACTTTC	TRCN0000466388	MMP28	2886	2465	2258	2140	1007	647	754	811	605	415	418	637	506	251	565	675
AAGCCATGTCATCTTGGAAATTCA	TRCN0000466389	GTPBP3	479	337	324	347	189	168	125	103	137	160	108	148	76	92	45	153
AAGGCTTGCCAACCGTAACATTCA	TRCN0000466390	MFGE8	1792	1318	1444	1628	741	846	759	663	582	515	470	826	65	143	495	253
ACACCCCTGGCTGACGACTGACCT	TRCN0000466391	CST9L	3605	3113	3158	3160	1063	1173	937	948	658	639	942	1066	372	187	626	384
CCCCACCTGTCGTCTGTACTGGGC	TRCN0000466392	FASTKD1	0	0	0	0	0	0	0	0	0	0	0	0	0	0	0	0
AACCAAAGCCTGTCAGTGAGCACC	TRCN0000466393	FAM64A	3494	2771	2798	2753	1500	1188	1289	1291	786	887	835	785	471	478	565	778
GCCCACTACAACATAGGCCAAATC	TRCN0000466394	TRMU	3464	3101	2548	2524	999	898	1194	1396	835	908	890	833	408	668	365	434
ACACTTCCGAAAATTGCCGAATAG	TRCN0000466395	RPL18A	3044	2565	2251	2049	1030	1016	949	955	675	726	7482	462	155	278	321	492
TAATATTCTTGAAAAAACGAAAGC	TRCN0000466396	NPBWR2	3782	2927	2369	2308	1325	1482	1670	1498	835	1600	1278	1036	647	373	861	816
GCGGGGGCGTGTGCCAGAGAATTC	TRCN0000466397	LOC102725009	8460	7867	7597	7262	3366	2939	2439	2957	1984	2540	2568	2049	1181	1773	1405	1346
ATATTAAAGGTTTTTGACCAAATC	TRCN0000466398	NR2C2AP	1959	1495	1595	1582	1272	813	709	977	707	922	503	803	379	432	481	659
CACGCAGTGAAGCGAACATACAAT	TRCN0000466399	MTPN	7878	7416	6388	6815	2262	2380	1916	2696	1443	1276	1906	1566	351	596	1486	904
ACTGGCATTTTCCAACAGAGTCGT	TRCN0000466400	LFNG	5160	4287	4140	4201	1682	1968	1777	1987	1380	1558	1128	736	738	471	777	743
TCATGCTGCGCCGTGGGACTGTGA	TRCN0000466401	MRTO4	3430	2908	2652	3186	1308	1015	1062	1095	1120	881	1069	1181	322	232	646	467
CGCATTGTGCCTACTAGATGATTT	TRCN0000466402	NAV1	367	302	228	292	128	162	45	64	54	0	6	68	0	70	1	87
ACCTCCATATTTTCATCACTCAGG	TRCN0000466403	PENK	126	138	34	50	24	40	19	74	178	0	5	1	31	0	15	2
CGGCTCATCTACCAGAGCAAAGTC	TRCN0000466404	NYAP2	12712	12174	10320	9694	3395	3839	2639	3624	1701	2130	1999	1502	707	1363	1668	1501
ACCATATGAGGTGATTGCTCGCAG	TRCN0000466405	LYPD2	10596	9055	9064	8659	4259	3511	2798	3761	2000	2223	2780	2276	640	1639	1383	1801
GGGGCCTAAGAACTCTCCTGGCGG	TRCN0000466406	TMEM257	6364	5817	5201	5448	2298	1860	1460	1894	1120	1507	1537	1069	274	717	1055	1189
CACCGCCTGACGTTCTTTGTTAAC	TRCN0000466407	FYB	1338	854	851	679	452	389	463	271	172	325	259	361	45	65	1	397
CATAACCCCACGATCCTAGGATCT	TRCN0000466409	CLCNKB	28	26	16	13	10	1	2	49	2	0	0	29	0	0	117	1
AGAACAACCTTTAAGGACCCCTCA	TRCN0000466410	FAM171B	24	31	2	13	4	20	0	0	6	1	13	0	0	0	0	0
TATATTGGGTATTTTGACCGTTTA	TRCN0000466411	FAM64A	4111	3370	3385	3346	1584	1619	1370	1311	887	1082	1304	803	520	501	1279	721
AAACCCCAGAACTGAAAACCACAG	TRCN0000466412	COPZ1	2121	1663	1560	1702	929	782	856	874	358	518	1291	686	494	503	387	458
TGATTAATGCACCGATCGCGCCCA	TRCN0000466413	SNX7	134	103	239	50	62	9	57	41	26	28	0	7	0	0	0	49
ACACGCGACTGCCCACTGGCATTA	TRCN0000466414	LPCAT2	3750	2646	2978	2913	1454	1251	975	1220	1062	1186	572	1375	206	432	450	825
GCTTAATCACGATCCCCAGTTCGC	TRCN0000466417	RABGGTB	266	211	249	152	181	33	87	62	111	0	117	138	25	1	1	13
ACAACTCCCGTATCTCCTGCTAAG	TRCN0000466418	LYRM5	3115	2531	2646	2642	1074	1072	864	1103	809	950	698	493	92	248	499	676
TAAAGTGCATACCCCAACCCCCTG	TRCN0000466419	ADAM33	7293	6615	6024	6669	2308	2345	2021	2175	1546	2052	1671	2229	455	570	994	1226
GCAATCTAATCTTAACTCCGACAA	TRCN0000466420	ZNF333	3672	2937	2991	3313	1219	1120	1036	952	1029	1100	971	615	391	248	415	580
ATCTAAGACTAACAGACATACCGA	TRCN0000466421	NO_MATCH_72	2396	1901	2056	2346	1094	1392	877	1081	693	937	718	705	373	361	492	519
CACAAGGAGCGTGCCTGTATGTTT	TRCN0000466422	RASGEF1A	1546	1412	1333	1033	385	283	381	645	439	381	309	203	27	101	166	132
AACTCACGTGGACCACTCCTAGTT	TRCN0000466423	UQCC2	1782	1374	1359	1513	799	797	563	738	379	481	651	510	185	262	548	290
CCACTCATTTAACGTTGCCGGTAC	TRCN0000466424	MSRB1	6418	5998	5589	5728	1876	1708	1729	2233	1351	1455	1393	1085	376	523	971	485
GACGCTGTGCCAATAAGTTACAGT	TRCN0000466425	NO_MATCH_165	2490	2043	2052	1789	818	684	563	934	493	609	425	380	248	273	376	278
TGGAGAAAAACCACCTATAAAAAA	TRCN0000466426	ING3	3280	3084	2752	2800	848	828	938	976	515	406	872	423	338	357	447	261
GTATGGACTATCGCGATATGCGCC	TRCN0000466427	MYH7	767	571	441	377	223	271	444	230	182	395	136	159	48	46	3	112
TCGGCCCCACTTCGGGATTGCTTT	TRCN0000466428	ZSCAN29	80	65	42	57	3	16	9	9	0	0	10	0	0	0	0	0
GAGGTTACATCCTCATACAAACTT	TRCN0000466429	CD79A	1877	1628	1542	1612	778	775	471	764	896	505	544	392	126	171	347	228
AGCAGCAGATACCCGAAGAAGGCT	TRCN0000466430	DNAJC3	1965	1737	1410	1910	598	664	723	599	906	112	438	566	84	57	56	79
CCGTTCGTGAGCCTCGAGTCACGG	TRCN0000466432	SEMA4A	494	433	237	439	157	133	66	83	128	98	92	177	2	85	2	185
GCAACTTACGGCCTCTTTCCACTC	TRCN0000466433	MARVELD3	1498	1368	1096	1237	481	331	382	535	229	343	269	392	79	118	167	157
AACCCTTGGCCCGCGGGCGGTGGA	TRCN0000466434	GTPBP3	1447	1088	879	1217	456	627	497	469	248	513	412	348	287	146	389	163
ATATCCCCTTTTAAAGCCCAGTTA	TRCN0000466435	DRD5	1850	1205	1113	1371	936	912	799	624	537	866	511	972	260	294	681	603
TCACCGGCGCTGAAATTCTATTTA	TRCN0000466436	CS	3324	2722	2312	2462	1162	972	790	877	705	870	412	897	244	511	439	758
GGCACCAGGAAACTAGGGGTGTGT	TRCN0000466437	TUBA1B	11824	9917	10447	9936	3411	2948	3372	3883	2806	1579	1747	2293	911	1067	2200	1619
TTAATCGCAATTCTTCAACCCGCT	TRCN0000466438	ARAF	1074	736	769	1285	409	412	545	285	106	333	437	340	45	67	125	228
TTTGATTTCATTTCTTTCGAACAA	TRCN0000466439	CDK18	507	301	296	281	163	149	174	218	145	154	148	253	1	67	99	294
TACTAAGGAGAGATAGGTAGTATC	TRCN0000466441	LOC100507855	1348	1203	1226	1222	372	364	326	580	329	438	148	377	39	158	210	31
ACTGTCCGAGGTTGTACACATTTT	TRCN0000466442	UGGT2	2690	2304	2368	2336	1177	1270	850	1150	648	657	852	787	268	594	750	586
ACGAAGTCACGAAAACGCAACGCC	TRCN0000466443	EPHX4	1451	1233	1269	1007	684	503	369	449	204	246	216	368	203	178	263	161
ACTATGTCCATGACTCATCATCGT	TRCN0000466444	L3HYPDH	3359	2733	2423	2748	1121	1157	1025	950	798	864	992	1055	206	274	954	473
TCTTTACTTTACGTCATCATTACA	TRCN0000466446	RPS6KA5	566	388	429	467	183	249	236	97	57	52	77	77	0	14	42	197
ATGTGTTTGCCGCACGCTGACCGC	TRCN0000466447	CPT1A	3	3	0	1	0	0	0	0	0	0	0	0	0	0	0	0
TAGTGGCTGCGCGCGAACTGTACT	TRCN0000466448	SLC25A51	11582	9901	9092	9395	4328	4238	3326	3701	2843	3306	2302	2442	1068	1083	1339	1181
TTAATAGTTGTAGCCACCCTTCGC	TRCN0000466449	LINC00895	10103	8242	8302	8930	4456	4176	3292	4188	3366	2302	2669	2395	1068	1306	2391	2112
CCACAAACCCTCTGGAGTAGCACA	TRCN0000466450	ANO4	1620	1263	900	905	203	470	317	542	128	486	466	36	111	23	412	162
CGTTCTAAGCAATTTTCCATACAT	TRCN0000466452	GRHL3	65	67	73	23	66	0	19	35	35	0	0	381	17	1	1	1
AAAATTTTCTGTCCTGACGAACGA	TRCN0000466453	PLP1	18	19	24	23	10	60	11	9	3	0	19	0	0	0	0	0
TCACCCCCGGCTCTAACTCCCCCA	TRCN0000466454	TMEM140	4579	4020	1959	2090	2737	2071	1696	2290	1319	1739	1673	979	701	1033	1141	1158
TCTTTCTTTGGGTTTCAATTTTCG	TRCN0000466455	C1orf35	1529	1280	1006	1117	676	521	630	361	383	713	422	412	110	405	181	238
ATAAGGACCTATTCCTGCGACAGC	TRCN0000466456	LYZ	782	529	583	391	267	319	209	260	99	344	209	234	59	73	25	85
AACTACTTCACAGAAGCTGCCCAC	TRCN0000466457	S100PBP	1323	1027	1073	1039	705	368	518	516	441	666	508	519	151	133	271	302
TCTGAAACATAATAAAATAAAGTG	TRCN0000466458	DEFA5	1776	1438	1680	1874	741	1064	432	772	403	646	469	254	189	247	415	413
CAATTACAGAATAACGTAGCTAAC	TRCN0000466460	KLHL23	1068	763	845	878	319	327	638	314	188	238	81	354	51	123	269	6
ATGATATAAATTGCTGTAGTTGTT	TRCN0000466461	GSDMB	864	596	677	714	410	464	423	372	401	358	267	141	78	122	342	491
GCTACCTTGAACTAATTTCCGACC	TRCN0000466462	ELOF1	2223	1980	2091	1891	739	759	713	718	411	630	502	457	29	213	453	336
TGAAACAATCAAACCGGCTCGCCA	TRCN0000466464	RUSC1	3406	2882	2651	2982	1028	1110	685	767	1001	341	549	734	16	210	681	322
GAAGCCTCCCAGCCAACGATTCGG	TRCN0000466465	MDFI	1554	1291	983	1002	355	505	478	758	270	249	261	281	334	170	280	136
GTCGAGCAATGCAAGTCAGTGTAT	TRCN0000466466	PSMB5	3021	2905	2518	2566	1116	1046	943	995	794	727	929	713	218	491	646	468
CGAAAGTAAATCCTGTTAATTAAT	TRCN0000466467	ZNRD1	2557	2467	2401	3080	847	890	549	964	337	585	348	294	277	456	518	510
GGGGTTCACCTGAAACCGACTACA	TRCN0000466468	C8orf4	4019	3660	2959	2588	554	617	540	693	609	877	1399	562	346	258	685	185
CTGTGTCCCTAGTTCAGGGCGGGA	TRCN0000466469	DUOX1	3995	3506	3315	2932	1626	1379	1479	1357	781	672	930	1044	428	482	681	817
ATGAACCTACGTTAATCAGAACAT	TRCN0000466471	SYCN	3263	2306	2533	2630	1280	981	1050	1176	795	1203	741	757	373	454	475	562
ATTCCGTGTCGAAGTCTTCGCCTG	TRCN0000466472	MAATS1	367	286	283	343	137	137	229	171	137	222	185	228	0	23	15	22
CCTCCGAACACCAGAGGGGATAGC	TRCN0000466473	RNF130	550	508	412	470	177	76	142	151	121	178	45	109	82	105	93	18
GGTTATCGTATTAGTCCACTGGGC	TRCN0000466474	PQLC2L	4061	3130	3040	3018	1462	1084	1011	1429	915	682	552	1031	532	378	561	650
AGGGGTTTGCTCTTCAAAACCCAT	TRCN0000466476	PNPLA8	381	253	288	400	99	215	218	157	26	2	110	164	0	62	1	118
ATCGGAGGAATCCGAACGGGGTTG	TRCN0000466478	SLC52A2	440	255	213	195	143	188	105	149	92	184	29	53	4	68	26	8
TATGCTCGCCCTCGCGTCCTGGCA	TRCN0000466479	ZSCAN32	2726	2271	2226	2507	1126	788	708	887	825	623	648	814	377	309	439	842
TCTCATGTGCTTTGCTCCACACAT	TRCN0000466481	NEK9	475	308	281	326	91	71	330	154	66	277	41	201	111	81	2	36
CTGGCTGCCAGCGCATTTACCTTT	TRCN0000466482	STRADB	2121	1858	1433	1657	669	627	721	528	260	344	396	272	162	260	204	616
GGAACTTTCTGTAGTTCGAACAGC	TRCN0000466483	ZNF124	2756	2203	1874	1701	746	1103	599	817	533	857	499	535	267	214	138	353
CGAACCTTAAACAAAGCACCCGAA	TRCN0000466484	ENSA	6946	6332	5450	5874	2329	1534	1801	1970	1493	1910	1486	1436	377	719	541	802
TAAAACAGTGGTCAGGCCGCTACT	TRCN0000466485	PIP5KL1	1523	1224	1095	884	417	189	575	480	348	366	185	324	69	41	41	347
ACCGAGTCCGAATAGTTTATTCAG	TRCN0000466486	HOOK1	1219	797	793	942	241	306	220	363	111	277	249	189	81	5	388	306
CCAGTCCTCGGCGCACGAATAGGT	TRCN0000466487	ERF	2119	1656	1384	1634	610	638	397	736	288	451	69	289	129	356	346	317
ACAATCCGGTTACCCTTTTAGTAG	TRCN0000466488	TPM3	317	242	198	181	142	112	43	56	74	3	8	135	46	51	0	63
ATCGATTAACGGACTCTAGCACCC	TRCN0000466489	TMEM213	4501	3544	3897	3761	1790	1518	1436	1769	1107	1180	1359	1280	413	572	1362	815
CTCGGAACTCAATCTCAAAGCTCA	TRCN0000466491	FGF9	3776	3506	3021	3261	822	1188	619	872	456	439	769	823	216	570	540	231
ACCCGATTGCCGCGCTTACCGGAA	TRCN0000466492	WWC2-AS2	2344	2558	1954	1751	854	534	612	756	236	548	478	449	350	274	228	372
AGGATTCGATTCTACTGTTAGTTG	TRCN0000466493	UBXN4	88	52	102	63	21	18	38	5	0	0	10	43	0	76	0	0
ATCCCGCCTCGGCCAGTAGTTGTC	TRCN0000466494	HP1BP3	138	78	55	100	52	45	8	85	24	22	21	32	0	35	41	0
TAGCATGCCGCTCCATGATTCCGC	TRCN0000466495	FNBP4	322	241	167	129	119	124	106	130	114	114	89	16	0	80	36	0
TATCAAAGGCAAACAAACCAATGG	TRCN0000466496	MMADHC	3637	3112	2447	3237	1047	1402	857	1001	820	924	1109	1274	327	568	774	536
GGTTATACTAAGCCATAAATGTTA	TRCN0000466497	TRMT61A	7653	6715	6255	6271	2775	3022	2348	2810	1700	2470	4352	1641	1011	485	1598	1388
CCGACGGTGTTTCAAGTGTTGATG	TRCN0000466498	COL20A1	4303	3734	3258	3240	1244	1202	950	1208	1141	428	1049	980	449	278	279	478
GCTTTGTGTAGGTATACCCTTCGC	TRCN0000466500	LOC102725009	5769	4507	4447	4737	2005	1928	1549	2338	2331	1249	1227	1046	420	668	1318	1277
AATCAAACTGTCTCGATTCCGTCT	TRCN0000466502	GGA1	333	190	204	261	110	87	57	190	105	8	103	74	20	31	107	88
AGGAGAACGCCACAGTTCAACTCT	TRCN0000466503	EDNRA	2769	2239	2281	2119	874	514	756	701	419	410	1439	712	392	266	407	367
TTTTGACTTAAGCCGATTCGACTT	TRCN0000466504	ZNF24	1067	807	959	871	461	503	329	437	282	313	495	314	90	210	300	97
TTATACGCAAACTTCTCCTGACGA	TRCN0000466505	AP3S2	3931	3138	3410	3496	1306	1155	1048	1574	1774	946	1013	1052	425	421	661	856
GAGGCACAGCACATCGAATGCCCA	TRCN0000466506	HBG2	3873	3375	3472	3603	1411	1148	1060	1484	762	1075	1182	745	365	312	603	579
TTTCTGGTAGCCAAGGGACACTAG	TRCN0000466507	C20orf24	1485	1146	1069	1311	500	579	530	526	319	643	570	504	172	144	211	425
GCCCCCGCGTTCTCTAATCGAAAG	TRCN0000466508	EQTN	1556	1415	1223	1049	452	371	286	472	198	418	264	579	229	176	101	29
CAATCCCTTATATCTCACTTAATC	TRCN0000466509	XAGE2	4017	3515	3236	2914	1183	1167	1337	1356	830	1308	946	1139	496	354	989	714
AACAGGGACGATGTAACGGTATTA	TRCN0000466510	SLC40A1	981	686	776	888	291	408	325	391	180	319	236	249	83	240	104	239
TCGTCGATAGTCGTCTAGTCGCCC	TRCN0000466511	BCAT2	1763	1413	1400	1347	348	497	416	472	859	355	402	849	126	112	168	569
GCGCAATGGTGTAATTGGTGGTTC	TRCN0000466512	FAM189B	6402	5740	5111	5078	1923	1970	1666	2176	1187	1463	1678	1361	581	941	1020	591
ATACCTGTGGGGGCCGCTACCCTT	TRCN0000466514	LAMTOR4	2404	1963	2025	2301	1172	788	829	1147	494	739	825	644	234	476	381	484
TTAGCCGATTTTAAACGTCAGTGT	TRCN0000466515	MTFP1	5405	4660	4660	4468	2005	2033	1666	1950	1490	1631	1220	1442	710	829	621	808
ACCAAGCATCGGTGTTATTCTTCA	TRCN0000466516	PRSS30P	5185	4552	4263	4541	1649	1546	1403	1508	786	1256	1248	1189	336	630	1107	656
GGGAATAGCATCGGTAATCCCTTC	TRCN0000466517	CCNC	779	680	585	478	225	128	48	206	109	257	30	23	144	39	3	54
AAGGCACCCCCTATCAGGACCTCT	TRCN0000466518	SHOC2	806	582	774	563	314	483	196	296	211	73	205	142	64	111	84	144
GAATACAAAACGATTCCCATACCA	TRCN0000466519	BIN2	2423	1629	1638	1875	811	673	596	826	444	1511	587	465	501	377	393	328
ATACGCACAAGGAAGCCATGCTGT	TRCN0000466520	Ttll7	1730	1218	1170	1541	432	535	602	609	639	689	495	261	66	84	180	111
GCGACGACTCTAACATCAAACGAC	TRCN0000466521	ZNF428	2672	2327	2213	2135	775	899	704	842	578	631	719	422	223	309	478	250
TAGTGTTCCCTCCATCTATCGAAG	TRCN0000466522	TMPRSS12	2605	2104	2074	1956	991	773	791	1109	517	1012	550	1126	22	395	355	314
ATTTCTTGGATTTTTATCGGCCAC	TRCN0000466523	NUMB	322	183	152	157	70	150	76	98	31	122	87	81	15	40	52	76
ACCTGACCATGTGGGCGGTTTGAG	TRCN0000466525	ATP6V1C2	2326	1904	1735	1882	476	553	408	559	334	495	483	434	152	280	437	146
TATTTTCCCCCACATTCGAGTGTT	TRCN0000466526	KLK7	2023	1701	1534	1611	938	482	808	794	536	446	519	740	483	61	498	429
TCGTTAATGTCTATTGATGGGTTT	TRCN0000466527	DAO	1836	1419	1346	1548	536	509	595	448	301	609	798	641	113	266	352	571
GCCGGTGACTGCATGTATGCTATT	TRCN0000466528	POMGNT2	5131	4364	4250	3599	1738	1413	1261	1281	1839	1129	1137	950	637	529	686	631
GAAATCCCATATGTACCTTCATTC	TRCN0000466529	SURF1	2429	2105	2199	2110	1017	1083	835	1000	568	1155	774	759	218	651	293	366
CTAGACATACATGATGCGGCACCT	TRCN0000466530	ADORA2B	3443	3044	1423	1402	561	415	510	479	617	1776	1407	1989	554	712	1092	689
GTCACTGTGTGTTCAAAAGAATTA	TRCN0000466532	VRK2	848	604	663	675	527	332	210	226	272	335	250	92	49	117	145	19
GCGCATGGCTTCGAAATGATGGTG	TRCN0000466533	NUP35	1192	988	835	1005	156	484	527	415	313	142	308	202	91	120	5	8
ATAACTATCCTCTAGGATGTACCC	TRCN0000466535	IQCH	186	132	167	140	75	86	121	94	27	464	45	71	16	28	27	152
CGATTGTCATTCGGCCGACTATTC	TRCN0000466536	HIST2H2AA3	6829	5875	5410	4992	1591	1468	1504	1279	1854	1672	1175	1494	303	504	946	451
CCTTGTCTCTTTAGTTCCGGAATC	TRCN0000466537	HLA-B	4308	3767	3374	3118	1461	1381	1215	1494	841	1087	1228	946	426	251	523	516
TAAATTATATAGCATATGCCCATT	TRCN0000466538	PSME1	4718	3552	4017	3615	1678	1637	1717	1782	1847	1419	1236	866	444	614	832	932
CATGGTTCGGTAATGAAAGTTCCA	TRCN0000466539	PCDHGC3	5712	5048	4224	4567	2082	1340	1079	1818	1485	1263	1137	864	651	471	955	699
GCCACGATGATCTTTTGGCCACAT	TRCN0000466540	TUBD1	30	27	73	23	24	47	21	0	0	0	73	0	0	0	1	0
ACCCTTTCAGGCTTCGACCGAGTT	TRCN0000466541	TGFBRAP1	18	6	10	9	11	9	5	10	4	2	4	12	0	0	6	5
GAGATCCCGATCTCGGATACACAG	TRCN0000466542	GCKR	3676	2474	3259	3027	1270	1148	1226	1131	923	757	1082	611	188	365	761	397
TTCTGTAACGCGAACGGGTCCGGC	TRCN0000466543	CCT7	3156	2260	2344	2423	1351	1147	999	1248	883	699	682	1023	211	345	593	388
GCTTTGTCCAGGTGACGATCGGTT	TRCN0000466544	IGF2BP3	32	26	10	30	19	5	0	6	1	0	0	0	0	0	0	0
AATTCATCGCCTCCCAAGTTGATG	TRCN0000466545	ATP1A3	128	74	106	74	54	50	39	58	102	26	35	39	18	0	0	0
GGGGGATCTACGATATGACAGGCG	TRCN0000466546	SLC25A22	3889	3369	2871	3454	1041	1168	892	1439	660	1003	1013	1106	83	261	402	408
TGGCACAGAGCTTCTTTAACATAT	TRCN0000466547	TMEM263	3257	2815	2152	2349	1008	821	755	1122	1060	557	578	603	181	157	78	274
GCGTAAATTTGTGCATGGCCCGAT	TRCN0000466548	NO_MATCH_181	6214	5229	5071	5577	2319	2032	1920	2110	927	1376	1138	1771	289	582	1287	765
CGAATCCACAATAGTACATGTCTA	TRCN0000466549	LINC00260	7178	7028	6780	6440	2318	1737	1537	2437	1272	1441	889	1645	358	673	654	1042
TCCGAAGTCGGTAGATTGACGGCG	TRCN0000466550	PDIA4	2611	1879	2336	1837	751	808	530	718	678	783	444	620	134	246	473	312
ATCAAAGATACCAGTGTTATTCCC	TRCN0000466551	GSDMC	1080	691	755	788	301	469	282	482	182	568	291	115	91	93	197	4
GCGTTAACGGCCATAGATCGCATC	TRCN0000466552	CLK2	426	279	318	151	173	79	35	130	108	0	321	46	141	53	1	44
ATTACCCCGGTATACATAGAGACC	TRCN0000466553	CKB	467	336	318	365	178	172	185	160	179	44	301	180	89	129	196	119
GCTTTTTGTCTTCCCTACTCACGT	TRCN0000466554	HIST1H2BD	1707	1340	1350	1256	1010	841	682	877	452	485	474	918	178	525	288	379
GCCTTGCACGCTAATAGATGGTAT	TRCN0000466555	ANKDD1A	1180	1006	808	1051	451	511	485	334	256	297	191	348	36	161	43	226
GAATAGCACAAAAGCATATTCCAT	TRCN0000466556	SYT2	1067	875	659	833	457	523	283	564	171	469	537	281	43	0	74	43
GCGAAACTAATGCCATTTAAGAGA	TRCN0000466557	OXNAD1	3919	3422	3360	2831	1499	1590	1415	1706	967	714	1157	847	356	419	636	902
AATTATTACTCTATTTATGGACTT	TRCN0000466558	SNRNP40	1277	818	1114	1076	602	948	713	678	864	760	700	767	232	212	368	317
CCCCAAAAACTATTTTTTATTCCA	TRCN0000466559	TMEM86A	5908	5365	6577	6079	2301	1802	1594	2098	1096	1216	1124	1785	256	651	926	913
AATTGTCACGAACTTAATCGTTTC	TRCN0000466560	LATS1	1463	999	1246	1303	776	800	702	642	610	792	599	444	191	384	589	473
AGGAGTTACCTCAATTTCCTCCTG	TRCN0000466561	NINJ1	2724	2095	1442	1436	724	601	610	619	479	719	292	459	90	302	204	310
CGTCACCCAGTGACCATTACTCCA	TRCN0000466562	CPEB1	1363	1056	625	569	281	265	510	476	339	329	473	602	284	456	361	379
AAAAGCTAGAACCGACAGCAAAGT	TRCN0000466564	BFSP1	481	293	287	304	249	216	115	168	235	177	58	106	114	66	125	2
GTAGGGGTTCACCGAAATCTACAC	TRCN0000466565	NR2C1	1342	1066	999	1034	487	419	397	366	268	130	466	326	124	51	314	153
GTCTGCCCCAGAATGCTCCGCGGG	TRCN0000466566	MUM1	3448	2993	2956	3327	1246	1374	1088	1167	755	1136	868	1408	263	476	617	647
AGTCAGCCGGAACTGAGACTAAGT	TRCN0000466567	NOP58	2398	1693	1762	2119	645	840	522	639	538	375	630	466	22	230	156	268
ACCCCCCTGACCTATCATCCTATG	TRCN0000466568	C10orf88	1388	980	1546	1074	456	364	382	521	333	261	248	177	104	113	58	76
CGCCATGGTTCTGCCTACCCTTTA	TRCN0000466569	NRBF2	3353	3566	2808	3238	1190	862	765	1032	992	374	843	759	220	439	534	348
ACATGCAACAGAATATGGGCAGTC	TRCN0000466571	MOAP1	898	830	606	544	480	342	200	377	82	246	64	188	76	30	110	55
TTTACATGGTTTTCAGCCCCTTGA	TRCN0000466572	GMFB	2973	2254	2506	2498	1147	1291	1168	954	860	598	1046	708	185	211	775	495
TTGTGTATGCCTCTTGCCACGACC	TRCN0000466573	GAGE7	3236	2697	2437	2759	1446	1472	814	1086	854	1310	963	943	479	377	565	748
GGAGAAAAACCTACATAAAGAACT	TRCN0000466574	FASTKD3	6603	5297	4575	5561	2209	1326	2251	1597	980	1247	851	997	142	739	1070	632
AAACTAGCCTCATCAAAATCACTA	TRCN0000466575	KCND2	1079	741	861	1002	403	390	635	443	391	502	234	752	59	237	178	290
ATCCCCCCGAGGACTACGCACATA	TRCN0000466576	SULT1A3	2318	1847	1664	1786	760	626	719	804	464	676	573	906	129	242	336	472
AGCTTAAAACTCATCCGCATCTTC	TRCN0000466577	MAGEB4	3144	2424	1344	1369	597	641	537	543	216	445	353	875	290	263	608	321
AATGAACGGGACAAGGCGTGGCGT	TRCN0000466578	F11R	2507	1854	2055	1743	1040	1244	856	1027	996	663	764	622	132	255	791	588
ACTGATTAAGACGAGGACTCCACT	TRCN0000466579	ROPN1L	6450	5212	4823	5244	2598	2390	2132	2228	1220	1622	1415	2053	471	673	968	1449
GGTACAGTAATTATGTAACTCTCC	TRCN0000466580	PSD2	8	5	6	0	0	13	0	9	0	0	0	0	0	0	0	0
AGGTATATGTAACCTTGCGGCCAA	TRCN0000466581	CHRM3	72	51	36	50	4	22	0	6	25	0	0	0	4	0	0	0
TTGCTGGAGAGACTACCACGTTGG	TRCN0000466582	RBBP7	201	147	218	198	36	19	135	62	33	13	102	21	14	1	134	34
TAGAGGAAAGAATACAGGATCTAC	TRCN0000466583	NO_MATCH_230	8838	7722	7749	7132	3250	3074	2461	2560	2669	1987	2074	1879	638	896	1270	1186
TGGGTAAAAGCGGACTAATTTCGA	TRCN0000466584	TEKT5	3954	3240	3025	2784	1042	1263	1049	1024	652	947	703	434	200	240	534	278
GGTACGCTGCGTCTCAACCTTACA	TRCN0000466585	PNLIPRP2	1153	1020	716	850	234	283	224	537	327	182	333	98	44	259	173	224
ATCTTAGTCCGCTCACGATCATAT	TRCN0000466586	C8orf59	677	416	373	456	254	228	152	252	188	11	278	323	58	128	156	87
AAGCTAGGACAAGGATACTCGCAC	TRCN0000466587	HPS1	1136	862	889	936	441	355	405	554	424	160	612	458	114	128	268	449
CAATCAATAACCTCAGTACCACGA	TRCN0000466588	AKR1C1	4987	4457	3922	3923	1425	1585	1251	1795	1640	1619	871	1595	456	122	1175	574
GATTTGCACCTTAGACAGGGGGTC	TRCN0000466589	TOLLIP	1641	1321	1279	1343	400	621	655	681	400	303	394	264	158	209	165	367
GCTGGACCTCCCTAGCACTTCTCG	TRCN0000466590	TMEM252	4050	3583	3567	3969	1451	1574	1032	1437	953	1159	1093	948	84	386	740	572
TCCTAAACTATCGTAGAAATCCGC	TRCN0000466591	C15orf40	4109	3484	3443	3029	1403	1422	1110	1732	1440	1035	907	1517	149	350	717	861
CAAACTTCTTTTCATCCTAAACCC	TRCN0000466592	GHRL	5388	4857	4403	4333	1956	1811	1589	1761	875	955	1113	1492	749	372	1190	653
CAATGATTTCAGCATGCTAGCCTA	TRCN0000466593	GNGT2	4375	3783	2556	3340	1360	909	817	1319	793	702	1259	1142	475	575	651	482
ATTCCAGTTGGGATTATAACAGCG	TRCN0000466594	RBM26	2682	2027	2134	2488	1130	1133	830	1039	724	858	539	796	163	349	706	609
TGCCGTTTTCTGAGATCCTTGACC	TRCN0000466595	NMUR2	6467	5696	5069	5372	2085	1839	1558	1831	1067	1311	1036	1209	552	861	1171	1343
GGCAAACCACCGGTAATATGTCGA	TRCN0000466597	RAP2C	6775	6386	5550	5776	1974	1896	1876	2124	1954	1184	1174	674	628	727	1055	730
CTGGGAGCCTCGTGGGTCATTAAC	TRCN0000466598	MYO10	6939	6252	6228	6240	2103	1983	1592	2412	1540	1645	1076	1897	501	733	1215	628
TATTGTCTCCGAAAGTGACATGGT	TRCN0000466599	SMG6	1573	1266	1463	1364	577	612	507	470	676	489	252	512	293	203	349	105
GACAATGAGAGATCCGTACAATTC	TRCN0000466600	CROT	2644	2529	2787	2381	1116	833	1027	871	319	723	641	667	145	177	418	458
AGTCAGCGCTCAGCAAAGTGTCGT	TRCN0000466601	DEFB127	2400	2079	1956	1988	721	778	815	655	672	575	569	928	141	362	95	308
GCGTATTCCGAGCACAAACTATTC	TRCN0000466602	PVR	628	462	658	491	136	211	131	153	115	122	161	72	0	60	136	1
ATCACCACTCATATCAAGTCGACA	TRCN0000466603	PIP5K1A	1232	753	1064	1090	397	315	311	461	516	286	451	1039	51	124	98	441
GGGCATGATAGTAGCACCACATAC	TRCN0000466605	C10orf32	4168	3653	3497	3411	1275	1174	883	1352	901	830	893	450	634	421	1364	269
CGCTGGTTTCTTAACATCATCGAA	TRCN0000466606	RABL6	950	730	661	488	75	121	198	279	70	109	44	67	108	75	73	101
ACTCGATAAAACTAGGGCTATTAC	TRCN0000466607	APOBEC3D	1135	863	686	689	528	331	366	347	481	92	330	245	118	249	135	291
CTCTTTCCGAGGCTCCTTATCCTC	TRCN0000466608	LINC00636	2296	1883	1903	1729	836	964	658	784	717	628	242	1319	125	197	278	364
TGATCGTGGCTGTCACCCCATGTC	TRCN0000466609	BTNL3	5392	4401	4254	3705	1871	1855	1411	1901	853	911	854	573	286	580	900	610
GGATCTTAATCTCCTCTTCAGGCG	TRCN0000466610	LRCH1	1273	878	646	942	414	418	214	417	178	588	179	339	151	174	12	276
TATACTACTCCTGTTGCGCACCTC	TRCN0000466611	ACOT8	2904	2412	2424	2520	976	910	880	1005	383	804	695	694	157	502	567	686
ACACAGAAAAGCGGGGGTCCCGCA	TRCN0000466612	LINC01587	5807	4949	5077	4947	1993	1520	1355	1987	1339	1423	1492	1364	680	873	785	786
GTCAACACCCCTGCACCTACCTTT	TRCN0000466613	TMEM170A	2523	2227	2109	2052	896	888	701	759	730	754	896	741	236	308	466	382
AAAGTCTCTCTGTCTGGGCCCTCG	TRCN0000466614	NTRK3	877	518	620	728	288	265	589	306	283	338	319	315	94	196	293	101
AATTGTCATTACAGGACCGTTAGT	TRCN0000466615	MGST1	2816	2040	2275	2498	1447	1348	1467	1373	1313	1307	1152	1200	263	492	866	749
CAATTAACCTACAAACTTTTCTTA	TRCN0000466616	IRF3	3481	2792	2611	2646	1201	712	929	1118	1076	666	836	884	145	262	390	419
CAGTACACGTGATCCGGGACCTAG	TRCN0000466617	NAA38	4214	3622	3229	3619	1266	1151	1188	1202	651	593	1214	510	203	519	591	871
TCCGACAGCAGTACCCGAACTGTA	TRCN0000466618	UBA7	614	494	531	386	134	90	146	144	56	130	181	129	51	5	58	29
CCACCAGCACCGCCTCTTCCGATG	TRCN0000466619	EIF3F	5059	4745	3980	3945	1789	1553	1240	1332	807	646	1104	498	229	371	277	386
AGTATCGATACGGTGATAAGACTG	TRCN0000466620	ROM1	2629	2137	2055	2240	1053	797	803	763	593	343	605	691	60	372	730	549
CCCGCAGAGACAACAGGGACAGAA	TRCN0000466621	FUK	517	427	392	335	169	101	54	45	42	47	1	10	0	56	38	51
TACTTTATCCTGCGATGTTGCCGT	TRCN0000466622	IL17F	2649	2113	1944	2021	1127	850	802	777	719	696	925	657	285	173	418	419
CATCAAGGCAAAGACTTCACACAC	TRCN0000466623	KLK15	9551	9229	8244	9193	3051	2630	1982	2856	2725	1627	2560	2884	1063	690	1324	965
TTGAGTTTAACAAAGCCTCTCTTT	TRCN0000466624	SMARCAL1	558	342	407	255	254	124	166	78	96	64	71	115	57	22	0	0
ACGAGCATACTATGGCCATGTAGA	TRCN0000466625	ADIPOR2	3676	3041	2913	3562	1438	869	867	1086	613	482	647	900	176	440	1001	854
GAGAGAACCATGAACGTTGCGATT	TRCN0000466626	CHD2	2414	1891	2029	2391	483	1002	615	999	496	760	707	882	184	294	509	347
TTCCTTTGCGAACCGGATGCCTGA	TRCN0000466627	LOC642131	1911	1264	1576	1610	673	521	862	665	474	201	476	403	27	197	559	486
GCGAGAGTAGTTGCACTCGTTTCA	TRCN0000466628	PFN2	8704	7678	6734	7282	3044	2538	1933	2370	1657	2089	2247	2217	482	859	1518	959
CTCTCGTGCCAGATATTTGGACCA	TRCN0000466629	KIAA1279	5322	3934	3765	4100	1605	1605	1315	1589	1239	781	1151	897	236	674	1138	669
CCTTGAGCCACAAACATTCCCACA	TRCN0000466630	CHAC2	298	264	171	131	48	57	125	69	21	71	74	0	44	2	0	106
CGGACCGACACGAGCACACATAAT	TRCN0000466631	SALL4	1392	1216	444	672	266	178	129	295	479	317	232	314	0	175	112	288
GGTACAGGGGAGCGGACCCTTTTA	TRCN0000466633	CTNND1	3131	2498	2620	2740	689	1027	634	822	470	152	459	1038	73	302	370	234
TTTAGGCCAATCCAAGCGCCTCCC	TRCN0000466634	A1CF	336	241	277	268	184	148	85	165	138	48	35	158	34	95	8	54
CCCTTGCTTTACTATATTCTCCAA	TRCN0000466635	CDKN2C	364	354	215	367	149	65	245	134	93	14	23	246	34	1	183	132
CACTCCCATCTATTAATGTGTGGT	TRCN0000466636	C3AR1	113	107	46	44	113	39	32	31	155	0	33	28	0	0	0	0
TTCTCTAACACGTACCTTCCAATA	TRCN0000466637	STPG2	89	65	67	43	24	22	42	128	28	30	14	56	0	1	0	8
CCGTTGTCGCAGGTAGGATGGTGT	TRCN0000466638	GBP1	241	163	137	161	32	27	72	38	44	1	5	9	0	31	1	26
ATGACTTGCGCGCAGGGGCCATTC	TRCN0000466639	STMN2	1244	936	864	1029	516	570	487	376	242	412	476	380	89	179	445	295
CTATATCTGCGACTTATCGGCCCC	TRCN0000466640	PHB	3006	2678	2647	2624	941	1039	1114	1033	1327	760	593	744	168	267	690	771
GCCAGCCTCTTTTAGACACTGATC	TRCN0000466641	TEX12	4738	4387	3628	4555	1926	1542	1318	1386	1024	1350	834	1066	171	526	281	575
TAAAACCTATGCACGCATGGCATA	TRCN0000466642	FAM107A	526	463	335	525	336	132	93	247	257	51	58	301	16	79	92	2
TTGCTAAATGCGACCGGAAGGATG	TRCN0000466643	OS9	3181	2178	2364	2529	1120	1647	955	1132	886	523	619	844	100	417	467	423
ACGGATCAATCGAGATTTTAAATA	TRCN0000466644	AP1M2	2882	2242	1936	2179	682	828	700	1036	592	404	760	904	165	119	460	414
GAACCCACTTTGATGTCGATGGCT	TRCN0000466645	PVALB	2001	1770	1629	2103	824	646	680	764	643	427	679	482	193	165	526	218
CTGTTCTCAGCTTGAACAGATATT	TRCN0000466646	ZNF513	664	501	365	415	450	694	359	526	202	171	80	363	32	141	40	384
CACGAACCCGCCGATTCTACGGTC	TRCN0000466647	RPS26	4088	3952	2945	3239	1113	1048	946	1218	777	1147	886	781	263	275	623	260
CCGGAACCCAATGCAAATTGACCG	TRCN0000466648	C16orf54	4743	4285	3909	3575	1332	1139	951	1140	867	937	929	1079	231	458	892	308
AACTCACAACGTTCTGCATCCTTT	TRCN0000466649	KRTAP19-7	1000	747	676	869	465	292	320	421	308	241	157	363	55	216	352	247
AATCCCTTTGGTATAAACTTCACA	TRCN0000466650	RAB32	1610	1174	1316	1242	674	777	609	901	887	734	541	646	291	312	501	500
GTAGTATTTCTTAAATAGCTGGAA	TRCN0000466651	SLC12A1	1096	881	911	989	443	420	388	355	257	386	371	216	106	203	187	216
AGTTAGTTTTTCAGTAACCATGAG	TRCN0000466652	WDFY1	0	0	0	1	0	0	0	0	0	0	0	0	0	0	0	0
TCTGACGTACATCTACAACACTAC	TRCN0000466653	DTD1	2042	1843	1642	1969	712	784	705	669	501	548	588	968	202	174	529	293
AATACCGTAACCTGTCAAATCGAC	TRCN0000466654	GPSM3	2883	2267	2327	2796	1418	1356	1178	1373	945	732	980	830	373	712	828	455
CCATGGGAATCCTCTGTAAGTCAG	TRCN0000466655	DAB2	2001	1543	1498	1450	483	842	551	489	224	695	380	717	89	141	226	482
ATTAGGTTAACGGACCAACGTTCG	TRCN0000466656	PLOD3	483	295	374	376	189	199	138	172	64	46	106	193	123	45	117	50
TTACACCCTGAGGTTTATGTGTAT	TRCN0000466657	ASH2L	1726	1195	1145	1510	556	593	585	616	639	422	362	369	223	276	234	390
GCCTGGATCCAGAGTTGCCCCGTC	TRCN0000466658	ZXDC	2589	2030	1760	2335	568	800	679	779	770	680	490	924	65	127	430	151
TGGGATTTACACAAACAACACGCT	TRCN0000466659	SUMF2	2681	2455	2623	2180	775	894	568	766	587	417	874	405	52	302	333	266
AGCCGATCACTGAGGCTACCCGAG	TRCN0000466660	RGMA	5241	4114	4180	4570	1254	1662	1103	1442	435	1311	785	834	194	418	773	767
TCCCGTCCCAAGTCGGATGTCGTA	TRCN0000466662	HDC	0	0	0	0	0	0	0	0	0	0	0	0	0	0	0	0
CAACCATTTTTCAGGATTCTATGG	TRCN0000466663	TMEM126B	5967	5431	5016	4955	2160	2207	1477	2011	1389	1504	1147	1422	491	945	1328	678
ACTATCCCACAGTAGTGTCCTTCG	TRCN0000466664	PHACTR4	1548	1080	954	1081	521	444	312	403	182	357	246	578	113	397	214	288
CTGTCATACTGTACAAAATCCGGC	TRCN0000466665	LRRN4CL	0	0	0	0	0	0	0	0	0	0	0	0	0	0	0	0
GCGCTGAAACGCAAGTTTAACTAA	TRCN0000466666	REN	1304	986	877	854	309	408	174	517	208	154	321	310	50	222	112	245
ACAGCTATGCTGGGTCCGATAGTT	TRCN0000466667	HIST1H4H	4724	3929	4421	4126	1793	1676	1464	1571	1566	1129	910	771	287	609	679	886
GTCACGGGACAACCGATCGACTTC	TRCN0000466668	C19orf44	3148	2225	2479	2948	1239	1032	963	903	894	491	530	435	533	227	610	287
ACCGCCTCACAAACATCCCGGGCA	TRCN0000466669	CRY1	3388	2545	2273	2704	809	898	824	801	513	830	725	549	374	276	340	188
TTCGCTGGTGGAAAAGCCATCACG	TRCN0000466670	PREPL	8631	7557	6768	7842	3075	2991	2669	3052	2195	2292	1881	2016	802	1114	1267	1360
CTTCCACCAGTTATAATCCAACTC	TRCN0000466671	EIF1AY	4278	4121	3694	4031	1463	1649	1210	1430	901	1379	727	879	218	446	760	610
GAATAATATCTAATAAACATTTAG	TRCN0000466672	CRABP1	3189	2323	2545	2388	1371	1016	1058	1032	1039	841	1029	774	602	1082	557	474
CAAGGAACCGACCGTTGGATTCAT	TRCN0000466673	HLA-DQB1	184	124	105	162	28	55	37	11	21	25	0	52	0	0	0	54
GTACCCCAGTCATAGTGCGCCCTT	TRCN0000466675	ARHGAP27	267	247	187	188	78	150	79	142	32	75	23	41	36	79	333	7
ACGATCGTGATATACAATGGCACG	TRCN0000466676	LRRC37B	1954	1289	1299	1378	696	581	452	571	397	378	568	612	27	136	132	239
ACCCAAGAAACTGGTCCAATCAGA	TRCN0000466677	IL10	5899	5182	4430	5074	2234	1924	1611	1995	1631	1314	1781	976	440	374	1096	1105
TAGTCAGCGTCGCATTGCGCGTCT	TRCN0000466678	RFWD3	2	0	0	0	4	0	0	0	0	0	0	0	0	0	0	0
CAACCTTGGTTTGCCCGTACCTGC	TRCN0000466679	N4BP2L1	5091	4764	4514	4174	1704	1684	1159	1827	1150	1180	1289	1195	406	744	929	424
GAGCACCCCCTAAGGACTCAATGA	TRCN0000466680	TEX37	4507	4015	4529	4138	1521	1581	1740	1492	1417	775	1238	1362	572	735	1215	934
CAAACCTTTCCCAAGCCTCCAATC	TRCN0000466681	TFAP4	1001	879	496	418	146	164	73	147	108	292	425	372	7	48	210	140
GAAAAAGCTTTTAGGCTTTAGGGT	TRCN0000466682	AEN	2512	1920	1685	2163	892	756	744	935	847	438	668	706	247	348	415	566
TATAGGATCCGCAGTTGCTCCGTT	TRCN0000466683	SERTM1	4332	3488	3130	3377	1500	1423	1082	1430	955	1852	754	695	336	530	853	850
CGCCATGACTAAAGCATGAGAATC	TRCN0000466684	ZNF593	8016	7890	6295	6598	1938	1713	1808	2271	1293	1203	1668	1361	676	561	632	837
CACGCCAAAGAAACCTCGAAGCTG	TRCN0000466685	CHCHD7	18207	17950	15843	15947	6754	5530	4178	5737	3686	3948	2708	3609	949	2082	2870	2445
CACGCCATCGCACTAAAGTCCACA	TRCN0000466686	HNRNPR	2552	1931	1736	1853	767	525	638	566	425	237	452	413	77	74	253	209
CAACGATCGAGTTGTAACGAAGGG	TRCN0000466687	SWAP70	3875	3040	2679	3120	1246	1339	1149	1355	814	733	1065	809	186	497	667	401
TGTTTTCTAGACTCATTACGACCA	TRCN0000466688	INHBA	4452	3301	3018	3293	1113	1556	1512	1785	731	1202	1150	1267	409	379	716	450
ACACCGGTCTGCTCCCGATCGGGC	TRCN0000466690	TNFAIP2	2535	1933	1992	2256	795	845	708	575	711	920	729	369	71	453	207	248
TCCAACGCAGCACACTCACTGTGG	TRCN0000466691	GCSH	1850	1897	1367	1583	669	496	445	688	368	391	336	300	123	95	305	206
TATTCTTCGGCCATCACAATACAC	TRCN0000466692	RAD54L2	82	46	66	69	0	0	0	44	1	2	50	0	0	0	0	147
GGACAATCAATGTACAAGGCACCC	TRCN0000466693	GNG2	15376	14335	11463	11850	5462	4573	4212	5362	2398	2618	3509	2719	842	1288	1857	1787
ATTAATCGAAACTGTCCCCATAGT	TRCN0000466694	BOLA2	2203	1620	1609	1848	1132	952	733	938	926	1017	1004	747	111	411	413	795
ATGTTCCAGTCTCAGACTGCATTT	TRCN0000466695	RPL36	1337	956	1058	1186	554	598	547	643	631	427	380	449	131	46	347	346
GACCGCACGGCCGAAATTCTACTC	TRCN0000466696	TARBP2	2485	2267	1816	1957	1018	680	832	830	590	506	823	560	130	304	568	434
AGACTCTAACACACCTGTCTTGGC	TRCN0000466697	RPE	3857	3089	2889	3027	1520	1366	1062	1512	1222	1652	664	1097	237	429	643	491
TCGAATGTTGACTGGTGAAGTTAT	TRCN0000466698	STAU2	2837	2360	2244	1814	1051	733	783	838	658	645	848	607	167	260	452	345
CCCGATTCGAGTGACTGTACACAT	TRCN0000466699	NO_MATCH_113	6584	6855	6166	5056	1944	1949	1432	2287	1116	1617	954	1555	334	574	1068	933
ACACCTAAACCACCATAACCAAAT	TRCN0000466700	KIAA0922	250	164	131	98	8	92	38	74	1	0	117	24	1	146	61	1
ATATATCGCGCGGGTCGGCCCTTG	TRCN0000466701	DNTTIP2	364	204	203	377	143	167	104	142	133	45	98	82	6	37	21	38
TCCCTAACAGCGACTTTGAGTTTG	TRCN0000466702	FAM166A	4091	3517	3016	3555	1358	1521	852	1639	846	1505	763	1813	532	354	775	789
ACAAATACCTATTAGCCAATGAGA	TRCN0000466703	NADK2	1801	1526	1380	2298	525	720	480	518	475	564	543	384	220	100	249	370
ACGTAGAACTATTACGTTTATCAG	TRCN0000466704	FAN1	1010	618	689	659	246	431	249	422	264	70	412	26	1	44	73	56
GCCCTGCAGACGTGCTATTAGCGG	TRCN0000466705	RNF144B	4327	4085	3704	3753	1792	1484	1228	1517	829	668	1043	833	234	739	503	513
ACCCTTCTGGGCTTCCTGTGATGA	TRCN0000466706	GNL2	1336	952	1331	897	642	363	438	454	347	62	544	612	161	413	242	330
CGTGTCACTGTCCATGGGCTACTC	TRCN0000466707	SIPA1L2	3857	3110	2958	2886	707	870	590	912	653	635	764	680	110	351	325	81
CCTGCTGGCTCGGGGCGCGTTCTA	TRCN0000466708	TINF2	2682	2215	2121	2488	740	735	883	836	748	794	307	560	461	355	567	517
TCTCGCAGGACAGTTCGGCCAACT	TRCN0000466709	TUBB4B	1024	920	768	764	499	379	330	269	188	233	248	441	6	2	52	186
CTTAATCTACTAATTCACAGAGCC	TRCN0000466710	S1PR5	1947	1651	1345	1152	764	752	530	794	507	466	540	351	128	253	502	188
CAAAGAGGTTTAGCCGCCCGACTA	TRCN0000466711	RSPH9	3683	3262	3305	3139	946	1293	1029	1021	1255	754	1101	359	258	368	287	391
GCATATGGGCAGTAATGCTACTTC	TRCN0000466712	MLLT6	2921	2437	1733	2166	827	905	830	981	610	1126	783	513	136	479	521	553
CAGATAGTCCCGAGAGCACTGCGA	TRCN0000466713	SPOCK3	2639	2363	2169	2202	540	662	544	813	352	666	495	595	70	133	319	343
ACTCAACAAGTCCTCTCTCATGTT	TRCN0000466714	SCAMP3	4309	3534	3501	4182	1397	1479	1252	1594	899	1507	1049	1332	634	862	630	629
CGACTTCTGTAATATGTGCTCATC	TRCN0000466715	CDK9	2023	1735	1186	1314	608	889	472	728	380	387	262	650	199	215	327	210
CTTAACTCTCCCTAGTTGAACAGG	TRCN0000466716	NLK	344	262	210	266	112	97	62	107	78	175	120	97	22	55	67	50
CATAATCGCACCGCATGCTGTAGA	TRCN0000466717	MAGI1	158	108	63	35	58	1	26	9	9	0	0	25	30	15	0	0
TGTCTCCGGACCTAACTAATTTTC	TRCN0000466718	PI4K2B	1948	1506	1475	1492	833	869	703	761	505	338	453	347	156	341	249	140
TCTCCTTTCAGTAACGGCTAAGAC	TRCN0000466719	PIK3CA	143	100	90	119	35	26	79	43	0	15	154	43	0	15	20	0
TAGATCATCAGTTATGACTCGTCA	TRCN0000466720	CENPP	2412	1975	1732	1747	931	994	672	837	709	287	535	558	100	296	455	320
CGACTGACGATCACGCATCGCGTC	TRCN0000466721	POLE	3887	3620	2855	2976	1143	898	804	1056	689	748	653	678	180	157	492	529
CAGCCCGCCGCGTTCTTTCCGTTT	TRCN0000466722	TM9SF1	1902	1406	1452	1261	347	559	551	366	153	195	347	356	34	231	226	56
ACACGTATCCGACAAAGGCGTAAA	TRCN0000466723	MRPL1	5965	5307	4702	4418	2047	1878	1710	1947	1461	1833	898	1796	355	583	913	1290
TCCGCGATAAGGTCCGCCCATACC	TRCN0000466725	CD99L2	52	57	39	32	20	11	0	0	8	0	0	0	30	0	0	0
TAACCCTGGTTTCTATGGAAATCC	TRCN0000466726	HOMER3	118	79	102	93	29	47	33	2	24	0	26	39	8	2	0	0
CCGTACTGCTAGGTGTGGAAGCTA	TRCN0000466727	HLA-DPB1	119	83	63	44	47	33	15	126	129	0	69	4	0	0	0	1
GATGGCTTTCTTTAACAGGCGAGC	TRCN0000466728	MED24	23	13	56	5	28	0	0	3	0	0	0	0	0	0	0	0
CATGTTTTCTAACCGCAAGTCTGT	TRCN0000466729	PDCD6IP	25	40	25	28	0	13	0	11	0	0	43	0	0	0	0	0
CTTGCCAACTTTTACACGTTGCGG	TRCN0000466730	C14orf39	1956	1454	1283	1643	778	477	872	489	385	407	435	433	39	125	129	263
GGCTCTGGTGCGGACAGCAGAAGC	TRCN0000466732	PIK3R1	1954	1712	1515	1654	478	647	574	743	319	512	587	1305	271	69	238	378
ATCGATACCGAATTCTCCGGACTG	TRCN0000466733	CGGBP1	926	720	617	796	323	290	218	348	247	240	328	266	55	73	106	288
CGCCCTGATTCCAAAGGCTGCATG	TRCN0000466734	CACNB1	4899	4033	3754	4374	1124	1054	1132	1129	1544	764	567	746	28	403	666	526
TACGTGCTATTTCTCAGTGGGGTC	TRCN0000466735	GNPTAB	2767	2459	2004	2005	671	735	713	911	386	396	467	543	125	399	432	302
TGGAATTAGCTCCACCGTGTACTT	TRCN0000466736	LZTR1	1144	914	989	1180	273	419	140	199	297	20	213	147	16	67	110	3
ACATATCCGAGACCTATTTGAATG	TRCN0000466737	RER1	4257	3465	2996	3418	1439	1253	1415	1256	1404	1646	977	1504	222	635	747	536
TGGATGTAAACCCACAATCCGGCG	TRCN0000466738	CCDC33	4424	3791	3180	3378	1462	1363	1192	996	840	1460	459	635	240	268	487	463
TCTTATCATTTTCCCTAGAATCGC	TRCN0000466739	TACSTD2	1143	881	896	816	313	350	290	467	249	467	223	532	265	224	275	179
CTTCTGTCGCCTGGTTCGTCCCGT	TRCN0000466740	SDCBP2	1187	1020	855	951	395	414	423	498	228	323	248	296	111	153	387	323
GTTTATGGACCATTTTACGGGACA	TRCN0000466741	SPSB2	2660	2107	2254	2312	1413	1236	1115	1347	662	889	1132	875	344	526	520	732
TCGATAGTAACTATTTTGCCTAAT	TRCN0000466742	CNST	2119	1904	1685	1685	654	465	617	729	701	473	366	242	249	291	345	131
TTGCGTGTGATGTTCCCACTTATC	TRCN0000466743	STK32A	1425	1140	1325	1038	574	405	508	556	255	402	467	495	103	153	130	262
TAGTTTTATATGGTTCTCCTCGGC	TRCN0000466744	KIAA1143	3162	2442	2495	3011	1293	1377	1303	1285	795	1706	649	745	356	506	673	627
GTAAGCTGTGGGATGTCCCGAATG	TRCN0000466745	NARF	2460	1880	1922	1981	489	629	682	760	401	694	636	662	303	267	509	432
GAAAAATTGCTTCGTTGTTCCTCC	TRCN0000466746	RPL3	2554	2005	1692	1809	961	765	792	851	445	890	462	1158	339	254	462	623
GACCTGTCATAAACTCAGTACTTT	TRCN0000466747	FAM133A	2469	2170	2052	2149	1090	1077	952	1023	728	513	976	638	278	385	289	477
CGACCCGGGCCCTGACTTCGTGAG	TRCN0000466748	RPLP2	12269	12249	10595	10799	3300	3513	2476	3952	2468	2198	1584	1882	636	1692	1188	899
GCTCAAAGCGCTCAACTACCAATA	TRCN0000466751	C11orf24	336	256	300	210	120	63	96	84	89	150	89	150	1	27	70	107
GGCGAGTTACTAATCCTTTCTGGG	TRCN0000466752	HSPBP1	3024	2632	2201	2029	946	684	637	1007	509	879	455	499	390	346	171	409
TGTACGGGGTCCCTGCGTGTATGT	TRCN0000466753	OSM	5001	4982	4847	4909	1402	1047	1102	1451	727	777	661	1053	180	558	457	752
AAACTGCTGAAATAACCAGGGAGG	TRCN0000466754	CSH2	2002	1449	1602	2029	1160	822	906	960	403	744	678	635	260	388	257	427
TGAGAGTTTTCAACTTTGCGAACA	TRCN0000466755	ATF6	5248	4786	3736	4501	2005	1561	1383	1857	1250	1021	1132	818	359	794	880	834
CAAATACATCGGTACACGCTCTTG	TRCN0000466756	PIGP	1282	1227	893	950	530	446	368	488	494	191	319	305	2	87	320	119
GGTTTTCACAATCCACCCCTAGAG	TRCN0000466757	CALML4	3276	2790	2382	2435	1014	1024	1131	1273	496	1151	811	678	175	469	759	170
ACCGTGAAACGTCGCCTACGCACT	TRCN0000466758	KLHDC3	1563	1174	1043	1204	440	854	336	452	347	188	69	297	84	181	167	503
CCGTATCTTTATAGAATCCTCGGA	TRCN0000466759	SPIC	3369	3267	2148	2388	1074	760	601	865	865	965	1119	771	79	500	362	127
GAGACAGTCGAGCAACCATATACA	TRCN0000466760	ZBED4	341	258	231	235	202	157	82	288	0	109	89	149	43	2	102	175
AGTGCTGCACGATATCGTACACTG	TRCN0000466761	SSX4	4190	3319	3237	3175	1844	1576	1126	1477	927	990	1005	1513	254	410	863	1028
AGACTCGCATACCGTCAAATTGAG	TRCN0000466762	CHIT1	2680	1978	2019	2061	1023	865	675	994	718	814	695	866	73	122	377	278
ATTTCAAACAAATATCTTTATCAT	TRCN0000466763	MYLK3	532	317	337	454	314	172	272	187	106	622	161	342	43	56	59	25
TGTCTCCGGCCTGGGCGCCTTTCA	TRCN0000466764	AES	2507	2103	1855	1888	771	939	574	771	531	527	664	574	159	193	150	260
GCCATCTGCCGTGAGGCCCAGGTG	TRCN0000466765	DERL2	5572	5105	4862	3766	2444	1770	1392	1892	1365	1240	1553	897	549	753	970	743
CTGTTCCCAGTGAATGTGTTTTGC	TRCN0000466766	C17orf59	2118	2152	1421	1642	893	606	535	657	638	887	315	340	89	253	256	401
ATGCCCATTTAACCTGAAATTCGC	TRCN0000466767	CRYBB1	2209	1740	1843	1934	807	539	610	867	566	621	464	598	374	194	376	328
GTGTGCCCTGCACCCCACTCTTGC	TRCN0000466768	GAS2L3	437	298	309	395	164	268	301	181	97	88	96	134	79	120	110	62
GCAAAGACAAACACCGCACCCCCC	TRCN0000466769	C14orf159	3588	2896	3163	3397	1032	1450	766	1229	855	577	357	600	98	277	654	158
CACCAGTATCGGGACTCGTTCTGC	TRCN0000466770	ATAT1	6801	6354	5575	5288	2049	1737	2359	2232	1387	1092	1103	1495	478	254	1005	649
AACGTTTTGAGAATACGGCTCAAC	TRCN0000466771	C16orf71	1042	603	677	690	414	264	347	312	437	80	299	419	53	128	215	201
TCCTCTCACTTCAGCGTTTAGCAG	TRCN0000466772	FAM193B	1783	1261	1116	1226	727	589	528	501	406	346	572	190	155	156	357	225
TAATACAATTCTATTTAACTTATA	TRCN0000466773	CLEC14A	1122	760	764	854	268	272	363	317	110	337	284	529	50	145	124	308
CTTCGATGTAGACACAACAGCAAG	TRCN0000466775	RAB1A	1928	1697	1304	1412	709	614	594	624	628	709	402	722	149	293	53	174
ATTTATATGCAAAAGGCAACAAGC	TRCN0000466776	MCM2	271	157	139	160	58	58	92	75	69	17	101	8	73	52	71	1
GTCTGTCAGTTTCCAATATTTCTT	TRCN0000466777	PRPSAP1	1470	1114	809	1027	606	913	556	355	216	409	381	771	152	128	272	504
ATTAGCAGGAAGAAATATGTGGTT	TRCN0000466779	PAPSS1	678	437	429	606	291	228	191	249	123	94	208	187	105	248	86	219
TTAATTAGCTTAAAGCACGGCATA	TRCN0000466780	PCDHA10	1024	649	1034	861	465	396	366	289	146	537	165	173	190	110	124	42
AATTGTGGTGCTTGTTGCCGCCTG	TRCN0000466781	ACTG1	808	544	676	584	326	366	355	204	137	154	194	516	224	213	238	91
ACTGGGTCACAGTAGTGATTACCC	TRCN0000466782	TGIF2	2768	2407	2019	1963	894	628	544	1047	782	672	636	1345	307	370	461	681
AGCCCGAATAGGCTCTTACCAAGC	TRCN0000466783	NO_MATCH_53	596	485	398	337	247	123	181	152	108	115	117	8	39	25	26	14
AAAACCCAGGTCGTTCCAACTCAG	TRCN0000466784	SFXN1	1435	1057	1044	1050	544	574	339	612	469	336	543	402	47	127	300	41
TAAAGCGGCTTTTGCAGTAACACT	TRCN0000466785	PDLIM2	8855	7685	7644	7259	2988	2961	2400	2780	2308	1876	1630	2326	649	654	1421	1894
ACCTTCCGGTACCTGAATCAGCCG	TRCN0000466786	TPD52L3	1227	1035	1049	921	391	381	450	541	352	371	264	336	54	157	127	369
GGATCTAACACGGCCCTCACTGTA	TRCN0000466787	BUB3	155	152	129	291	27	21	32	184	0	1	70	49	0	0	0	0
CTTGAGATGGGCCAGTAACTGTGC	TRCN0000466788	BTBD9	167	125	147	95	45	21	53	54	31	59	0	18	1	37	194	2
ACCGAGCTTCCTGGGTACCTTGGA	TRCN0000466789	KRTAP10-5	11018	9531	7730	8297	4354	4321	3392	3603	2559	2747	2428	2520	518	1318	1940	2202
TCCCTAGAATGCAATACTATTATC	TRCN0000466790	LSP1P3	8854	7949	7609	7356	2743	2945	2108	3004	2659	2286	1958	2002	801	1083	1972	2094
GCCCTGTCCCAACGCTGTTGTTAA	TRCN0000466792	CDC20B	4436	3917	3435	3762	1547	1521	1054	1614	1045	1152	1223	872	444	362	930	982
ATTACATATTATCTTGTGATCTCA	TRCN0000466793	GPC3	68	33	35	22	13	47	27	4	21	7	33	0	0	0	0	63
ATCAAGGGCCTAAGGTAAACAGCT	TRCN0000466795	BPI	108	97	61	126	6	49	24	9	52	112	0	30	0	16	0	8
CTTACAATAACTAAGCAGCCCCCG	TRCN0000466796	SNX21	3041	2632	2503	2335	1038	737	719	1050	755	989	725	695	280	221	683	622
GGACAAAGAGTTCTATCACCGTCA	TRCN0000466797	SECISBP2	4493	4094	3650	3620	1376	1487	851	1307	671	746	1017	1288	257	647	1049	337
ACTTAGCAATCAGAGCGGCGAACA	TRCN0000466798	PPP1CA	247	201	266	200	71	37	159	34	54	14	1	86	0	0	67	103
CATACAATGTCGAAGTCAAGGAAT	TRCN0000466799	SULT1A1	1567	1242	985	1090	541	411	392	582	232	366	252	275	78	324	361	215
CTACGCCTAACAATAGCTAGTCAG	TRCN0000466800	LIMD2	7325	6645	6270	6569	2504	2628	1623	2822	1578	1734	1930	2151	490	879	1340	766
TGCCTATACCACAGTATAAGGTTT	TRCN0000466801	ERI3	4877	4153	4582	3578	1564	1196	1030	1388	863	721	852	1066	92	864	443	786
ATGCCCGGGGAGTCGTACGTAAGG	TRCN0000466802	LONRF1	2585	2068	1716	2016	1023	1420	786	915	875	653	676	541	185	232	393	858
GCCATAGCCATTCATCCCGAGCTT	TRCN0000466803	PTPN9	2667	2160	2052	2605	635	736	727	758	377	714	666	414	276	181	436	527
CTGAGTTACGATAAGTAAGCACAC	TRCN0000466804	ARID5A	3991	3394	2803	3497	1136	1152	1004	1378	893	764	899	1141	355	569	56	350
CCTCCAACTGCAGAATGATGGACA	TRCN0000466805	HTR2B	318	255	215	244	158	45	93	160	103	145	95	143	63	37	27	0
GTCAGGTCATCGTTGATAAAAAGT	TRCN0000466807	HSD3B7	3080	2514	2487	2788	1204	1046	1029	905	732	1083	829	750	370	440	386	546
GAGCTTCCAGTCTAGCTTCGTCTG	TRCN0000466808	RAD23A	1492	1159	1306	993	509	401	304	450	379	300	241	338	104	267	304	120
AAGTAACTCTCACATAGCGCTGGC	TRCN0000466809	NO_MATCH_14	68	39	11	54	10	10	0	0	0	69	0	0	0	51	0	0
CTACTAACCATCCGTCAGTTTTTA	TRCN0000466810	TMEM51	2184	1981	1011	978	476	643	425	630	491	472	418	599	282	334	558	142
CACCATCTTCCTCTACTAGCAACA	TRCN0000466811	OSTC	3173	2783	2915	2517	1052	914	631	933	366	337	479	441	208	563	608	623
CATTGACTTTCGGTTTTATATCCT	TRCN0000466813	MRPS6	1334	1083	870	925	425	483	323	288	131	267	525	182	245	251	294	154
[truncated: 15,827 more rows]
