# Supplementary material for: Pooled Genomic Screens Identify Anti-apoptotic Genes as Targetable Mediators of Chemotherapy Resistance in Ovarian Cancer
Source: Oxford University Press journal article supplement (doi:10.1158/1541-7786.mcr-18-1243), 2019-08-28
Supplement: 15417786mcr181243-sup-212398_3_supp_5704739_pw3r8y.xlsx [file 15417786mcr181243-sup-212398_3_supp_5704739_pw3r8y.xlsx]

## Sheet: Kuramochi
ID	Construct IDs	Gene Symbol	Name	Gene family	entrez_id	ensembl_gene_id	LFC cisplatin	q-value cisplatin	LFC paclitaxel	q-value paclitaxel	LFC cisplatin/paclitaxel	q-value cisplatin/paclitaxel
GACGAATCAGGCCCTCGAACGTCA	TRCN0000465206	ZDHHC11	zinc finger DHHC-type containing 11	Zinc fingers DHHC-type	79844	ENSG00000188818	0.0107883	0.9923	0.233811	0.923209	-0.123467	0.948943
GTTTCATACTGTAAGCTGGCCCCG	TRCN0000465207	LMOD1	leiomodin 1		25802	ENSG00000163431	0.247012	0.693836	0.315027	0.877577	0.254484	0.845028
ATAGAGCTCCCACAACATGACCTC	TRCN0000480117	PFKFB1	6-phosphofructo-2-kinase/fructose-2,6-biphosphatase 1	6-phosphofructo-2-kinases/fructose-2,6-biphosphatases	5207	ENSG00000158571	-0.0467124	0.953286	0.177182	0.932053	0.265451	0.677206
AGGTCTCTTACCTTAGGAGACTTT	TRCN0000468677	PFKFB1	6-phosphofructo-2-kinase/fructose-2,6-biphosphatase 1	6-phosphofructo-2-kinases/fructose-2,6-biphosphatases	5207	ENSG00000158571	0.169926	0.807625	-0.00992744	0.99542	-0.146077	0.926816
CCAAGAGATCCAATCTGACACCAC	TRCN0000465209	PFKFB1	6-phosphofructo-2-kinase/fructose-2,6-biphosphatase 1	6-phosphofructo-2-kinases/fructose-2,6-biphosphatases	5207	ENSG00000158571	-0.0874527	0.899277	-0.106308	0.93057	-0.0146982	0.991086
GTAGGGTCACACACTAGCGGCTCG	TRCN0000465210	NKAIN4	sodium/potassium transporting ATPase interacting 4	Na+/K+ transporting ATPase interacting	128414	ENSG00000101198	0.0752194	0.804881	0.109408	0.878588	0.01173	0.983668
CTCCTTCAACCCACCTAAAAGTCG	TRCN0000465211	MRPS18A	mitochondrial ribosomal protein S18A	Mitochondrial ribosomal proteins	55168	ENSG00000096080	0.0555328	0.927626	-0.0539722	0.963039	0.104408	0.892154
CTCTTTTCGCGTAAAATAGAAACC	TRCN0000465212	TICAM1	toll like receptor adaptor molecule 1	TIR domain containing	148022	ENSG00000127666	0.127902	0.683731	0.214163	0.671615	0.0969971	0.88337
TTCGTACTCCGGTTCCTGTGCTTC	TRCN0000465213	RHOG	ras homolog family member G	Rho family GTPases	391	ENSG00000177105	0.0544567	0.870739	0.0723592	0.911863	-0.00969616	0.99057
TTTTAGCCTGGCGAAAACTGCTGC	TRCN0000465214	TRIT1	tRNA isopentenyltransferase 1		54802	ENSG00000043514	0.179721	0.586535	0.133664	0.895457	0.276262	0.528016
CGAACCATCAGACAAATGTTACTA	TRCN0000478187	CCDC114	coiled-coil domain containing 114		93233	ENSG00000105479	-0.24407	0.394265	0.0257799	0.978288	-0.127077	0.883809
TTCATTACCATAACTCGGTGGCCA	TRCN0000465215	CCDC114	coiled-coil domain containing 114		93233	ENSG00000105479	0.0226197	0.969437	0.0182787	0.983535	0.00791621	0.992852
AGCTACACAGAACGGCTCCTGGCG	TRCN0000473324	HAGHL	hydroxyacylglutathione hydrolase like		84264	ENSG00000103253	0.00539517	NA	0.00851954	NA	0.00657668	NA
TTTGTAGACCATAAGGTCTAAGTT	TRCN0000465216	HAGHL	hydroxyacylglutathione hydrolase like		84264	ENSG00000103253	0.106357	0.878249	0.020884	0.994487	-0.0100271	0.993397
CCTATAATATTCCAAGTGTCTTTA	TRCN0000465241	HAGHL	hydroxyacylglutathione hydrolase like		84264	ENSG00000103253	-0.0855359	0.827853	0.152728	0.848264	0.0931278	0.8811
CACATGGCTGGCATCATGTCGTCG	TRCN0000465217	NABP2	nucleic acid binding protein 2		79035	ENSG00000139579	-0.228782	0.486976	-0.229812	0.735322	-0.142403	0.806311
TGAGATCCACAGATCATGAGACCC	TRCN0000465218	TTC23L	tetratricopeptide repeat domain 23 like		153657	ENSG00000205838	-0.137083	0.691526	-0.00264307	0.995188	-0.124696	0.832761
TCATACTGACGGTTCCCCACTCGG	TRCN0000465219	C3orf49	chromosome 3 open reading frame 49		132200	ENSG00000163632	0.0787896	0.760436	0.00390086	0.987954	0.115021	0.748927
ATAAAGCACCCGCTCCGACAGGGA	TRCN0000465220	CELF6	CUGBP Elav-like family member 6	RNA binding motif containing	60677	ENSG00000140488	-0.14859	0.827862	-0.231562	0.917316	-0.226698	0.843956
ACGCATCCCATACATCCGCCCGGC	TRCN0000465222	PGAP3	post-GPI attachment to proteins 3		93210	ENSG00000161395	-0.137279	0.841917	-0.0626163	0.973216	0.153739	0.905453
GAATTTTCGTTAAGGGGTCCCCTT	TRCN0000465224	HSD17B3	hydroxysteroid 17-beta dehydrogenase 3	Short chain dehydrogenase/reductase superfamily	3293	ENSG00000130948	0.198639	0.733537	0.232437	0.916652	0.313672	0.718471
GTCGCAGCGTATTGCCTGGATTGT	TRCN0000465225	ANLN	anillin actin binding protein	Pleckstrin homology domain containing	54443	ENSG00000011426	0.0769361	0.863929	0.0491197	0.96649	-0.00933202	0.993075
GGCGTAGGCCCCCGCTTTAAAGTG	TRCN0000465226	C5orf46	chromosome 5 open reading frame 46		389336	ENSG00000178776	-0.187428	0.628999	-0.272228	0.649061	0.0134705	0.986326
TATGGCCAGAGTCTATGCAAGGAA	TRCN0000465229	FAM217A	family with sequence similarity 217 member A		222826	ENSG00000145975	-0.155481	0.616766	-0.0232716	0.981395	-0.232367	0.556587
ATGACCTGTCCGCCTTCAGTTGTT	TRCN0000465230	KCTD1	potassium channel tetramerization domain containing 1		284252	ENSG00000134504	0.15274	0.678209	0.194908	0.782226	0.267658	0.604332
TCACCTCCAGCAGAACGCTGCTGA	TRCN0000488011	CDK17	cyclin dependent kinase 17	Cyclin dependent kinases	5128	ENSG00000059758	-0.0750424	0.929972	-0.151606	0.950768	-0.162979	0.922627
TTTGATACAAACCTCAAATCAGCC	TRCN0000465231	CDK17	cyclin dependent kinase 17	Cyclin dependent kinases	5128	ENSG00000059758	0.15034	0.864625	-0.0453132	0.984813	0.0639742	0.977098
AAGTCCCTTTCATCCGCTTGAGTT	TRCN0000468143	CDK17	cyclin dependent kinase 17	Cyclin dependent kinases	5128	ENSG00000059758	0.214743	0.815752	0.378265	0.892094	0.165814	0.94496
TCGCGGCCTCATCCCCCGAATAAA	TRCN0000465233	ATOX1	antioxidant 1 copper chaperone		475	ENSG00000177556	-0.216454	0.279873	0.112168	0.845717	-0.040702	0.945687
GATGCATTTGGTTTGTCTGCCCTC	TRCN0000480386	ZBTB24	zinc finger and BTB domain containing 24	Zinc fingers C2H2-type|BTB domain containing	9841	ENSG00000112365	0.0684158	0.891534	0.0602175	0.946818	-0.0401021	0.971546
CATACCCCGGGCCCCCAGCACACC	TRCN0000465234	ZBTB24	zinc finger and BTB domain containing 24	Zinc fingers C2H2-type|BTB domain containing	9841	ENSG00000112365	0.00190545	0.996127	-0.0586838	0.956784	0.0192238	0.9833
CGGCGTACCTGTGTTTTGATTGAG	TRCN0000465236	DPH3	diphthamide biosynthesis 3		285381	ENSG00000154813	-0.116218	0.697549	-0.216587	0.638552	-0.113458	0.796601
AATGCATAAGCAGAACTCAGAGTC	TRCN0000465237	LILRA4	leukocyte immunoglobulin like receptor A4	CD molecules|Activating leukocyte immunoglobulin like receptors	23547	ENSG00000239961	0.292929	0.531207	0.151287	0.946121	0.367715	0.610402
CGGCAGATCCCCCCACGAACCTTC	TRCN0000465238	EIF4A2	eukaryotic translation initiation factor 4A2	DEAD-box helicases	1974	ENSG00000156976	-0.100033	0.798179	-0.141671	0.872958	-0.23553	0.587761
CTAACCAACTGATATACTTTGCAT	TRCN0000471013	EIF4A2	eukaryotic translation initiation factor 4A2	DEAD-box helicases	1974	ENSG00000156976	-0.0794013	0.817077	0.0323161	0.96317	0.116921	0.838174
TAGTGTCAACTCCATCTTCCCAAA	TRCN0000470282	CELF5	CUGBP Elav-like family member 5	RNA binding motif containing	60680	ENSG00000161082	-0.0557017	0.911906	0.127584	0.904206	-0.0396673	0.972409
CTTAGCCTAGCTGATTATTTGTTA	TRCN0000465239	CELF5	CUGBP Elav-like family member 5	RNA binding motif containing	60680	ENSG00000161082	-0.121412	0.868894	0.114166	0.95868	0.308714	0.702968
ATCCTCCAGCGTATTCTTCTACCC	TRCN0000465240	HIKESHI	Hikeshi, heat shock protein nuclear import factor		51501	ENSG00000149196	0.161689	0.867085	0.0740242	0.97926	0.240956	0.888366
AGTCTCTTATATATGAATGCAATC	TRCN0000478508	HIKESHI	Hikeshi, heat shock protein nuclear import factor		51501	ENSG00000149196	0.138679	0.740461	0.0601896	0.949338	0.25906	0.640219
AACCCCGAAGTTTGTATTGGCTTT	TRCN0000465242	SIRPA	signal regulatory protein alpha	CD molecules|V-set domain containing|C1-set domain containing|Signal regulatory proteins|Ig-like cell adhesion molecule family	140885	ENSG00000198053	0.0572231	0.956498	-0.153491	0.955267	0.254489	0.84453
CTTGCTTCCATTTGGCCACTCGGC	TRCN0000465243	ZMAT4	zinc finger matrin-type 4	Zinc fingers matrin-type	79698	ENSG00000165061	-0.021801	0.946931	-0.0674946	0.905829	0.0208421	0.975217
TGGCACCTCTATTGTTGAAATTCC	TRCN0000465244	NCOA4	nuclear receptor coactivator 4		8031	ENSG00000266412	-0.274289	0.342383	-0.0597901	0.954399	-0.0636756	0.936881
ATCCCTACAAAGATCCTGGTGCGA	TRCN0000470289	NCOA4	nuclear receptor coactivator 4		8031	ENSG00000266412	0.018405	0.969788	0.0771286	0.913623	0.0765148	0.905747
CACGAATGCACACACAACGACCCG	TRCN0000465245	SP2	Sp2 transcription factor	Zinc fingers C2H2-type|Sp transcription factors	6668	ENSG00000167182	-0.16709	0.548902	-0.184103	0.72402	-0.0667204	0.914991
CATTGGAGCGGCCCTTCAGACTAA	TRCN0000473389	SP2	Sp2 transcription factor	Zinc fingers C2H2-type|Sp transcription factors	6668	ENSG00000167182	-0.374935	0.142484	-0.0464395	0.963309	-0.195983	0.702815
CTAGCATGTCGTGCTTTATCCATG	TRCN0000465246	MAPKAPK5	mitogen-activated protein kinase-activated protein kinase 5	Mitogen-activated protein kinase-activated protein kinases	8550	ENSG00000089022	0.103353	0.893421	-0.0976667	0.966633	-0.0562879	0.976529
ATACTCCTTTGTCCGTGTTGTACT	TRCN0000488301	MAPKAPK5	mitogen-activated protein kinase-activated protein kinase 5	Mitogen-activated protein kinase-activated protein kinases	8550	ENSG00000089022	0.30209	0.662256	0.240479	0.93041	0.256255	0.881284
TTTCCATTCCCTGTCAACTTAGGG	TRCN0000488288	MAPKAPK5	mitogen-activated protein kinase-activated protein kinase 5	Mitogen-activated protein kinase-activated protein kinases	8550	ENSG00000089022	0.223914	0.768933	0.000561346	0.999627	0.233607	0.883657
AAGTCTATCAAAAGTCCCATCACT	TRCN0000473802	ACPP	acid phosphatase, prostate	Acid phosphatases	55	ENSG00000014257	0.376363	0.257742	0.0538783	0.980863	0.236056	0.801817
AGGCCGCTTCAGATCCCCCCAATG	TRCN0000465247	ACPP	acid phosphatase, prostate	Acid phosphatases	55	ENSG00000014257	0.0624968	0.910046	-0.20563	0.800556	-0.0476023	0.96243
CTGCCAGGTTTGACATAATTAATT	TRCN0000465248	SEC61A2	Sec61 translocon alpha 2 subunit		55176	ENSG00000065665	-0.193273	0.856343	0.267357	0.939864	0.300136	0.855306
CATGAGTTGCAACCCAAACGAATT	TRCN0000465249	DSCR9	Down syndrome critical region 9		257203	ENSG00000230366	-0.0929767	0.744993	0.006655	0.988664	-0.0288883	0.968597
ATTATGAATCCCTAAAAGGTGACA	TRCN0000465252	TMED5	transmembrane p24 trafficking protein 5	Transmembrane p24 trafficking proteins	50999	ENSG00000117500	0.244452	0.299438	0.27793	0.452247	0.315948	0.35566
ATTTAAAGGTTACAATCGGCATGT	TRCN0000465707	TMED5	transmembrane p24 trafficking protein 5	Transmembrane p24 trafficking proteins	50999	ENSG00000117500	-0.163951	0.871465	-0.107697	0.970156	-0.117882	NA
CTCCACCCCGAGGCCGGGTTTTAG	TRCN0000465253	MYO1C	myosin IC	Myosins, class I	4641	ENSG00000197879	0.359513	0.529864	-0.30283	0.899859	-0.110005	0.95926
GTCACGATCCTCAATATGTACTGG	TRCN0000465255	GJA3	gap junction protein alpha 3	Gap junction proteins	2700	ENSG00000121743	-0.238398	0.577898	-0.161819	0.876382	-0.121448	0.880135
TGGGTTGCTTGTCCAAACATGATT	TRCN0000465256	MPG	N-methylpurine DNA glycosylase	DNA glycosylases	4350	ENSG00000103152	-0.174511	0.788365	0.0999603	0.964561	-0.126777	0.93182
CCAGGCGTACTCATATGTTAAATG	TRCN0000465257	RHNO1	RAD9-HUS1-RAD1 interacting nuclear orphan 1		83695	ENSG00000171792	0.14509	0.391172	-0.0760891	0.893813	0.174554	0.518006
CTAGCTAATTCGCGGACTACCATC	TRCN0000465258	TMED10	transmembrane p24 trafficking protein 10	Transmembrane p24 trafficking proteins	10972	ENSG00000170348	-0.039486	0.892616	-0.0136219	0.98598	0.00421734	0.992387
CCGTCCAGCCGGTATACATTTAAA	TRCN0000465260	CLDN10	claudin 10	Claudins	9071	ENSG00000134873	-0.136242	0.673258	0.0554314	0.944599	0.0464943	0.952033
AAGCTCAACACACATATGTCCCAG	TRCN0000489933	SLC47A1	solute carrier family 47 member 1	Solute carriers	55244	ENSG00000142494	0.122053	0.821301	0.0499048	0.963677	-0.159076	0.890635
CAGACGCCTAACCGGGACTACCCC	TRCN0000481487	SLC47A1	solute carrier family 47 member 1	Solute carriers	55244	ENSG00000142494	-0.229841	0.668686	-0.187367	0.932053	-0.217196	0.836697
CCCGGCCCACGTAACTTCTTTGTG	TRCN0000465261	SLC47A1	solute carrier family 47 member 1	Solute carriers	55244	ENSG00000142494	-0.0848932	0.834499	-0.138866	0.876718	-0.168123	0.735436
GATGGAACCCTTTCTCTATATGGT	TRCN0000465262	INTS7	integrator complex subunit 7	Integrator complex|Armadillo-like helical domain containing	25896	ENSG00000143493	0.299904	0.705844	0.163772	0.959732	-0.179383	0.94496
GTATCCACATATGTTTTGTTCTCC	TRCN0000491504	SNX24	sorting nexin 24	Sorting nexins	28966	ENSG00000064652	0.128981	0.591828	0.0970031	0.86113	0.118825	0.764026
AGGAATGTTACTACTGCAGGTCGC	TRCN0000465263	SNX24	sorting nexin 24	Sorting nexins	28966	ENSG00000064652	0.0841377	0.709869	0.0774889	0.875792	0.110805	0.740135
TCGCCCCGCTTATTGGGACAGCGC	TRCN0000465265	PPP1R8	protein phosphatase 1 regulatory subunit 8	Protein phosphatase 1 regulatory subunits	5511	ENSG00000117751	-0.0395265	0.940284	0.00150206	0.992606	0.134668	0.814996
CCGGTTTATGTGTTTCTCGGTTTC	TRCN0000465266	BNIP1	BCL2 interacting protein 1	SNAREs|BCL2 homology region 3 (BH3) only	662	ENSG00000113734	-0.0703416	0.844268	-0.0963283	0.905317	-0.127615	0.809725
TGCACAATCACATTTAATCCTCGT	TRCN0000465267	GCLM	glutamate-cysteine ligase modifier subunit		2730	ENSG00000023909	-0.163896	0.526942	-0.0502198	0.947939	-0.0558406	0.92355
CTATTTCCCGGATACTTTTTCGAA	TRCN0000465268	NUP210P1	nucleoporin 210 pseudogene 1		255330	ENSG00000198284	0.13099	0.71038	-0.028627	0.980649	0.234189	0.489965
GTAGATCGGTAGTCGGGCTAACAC	TRCN0000465269	OTX1	orthodenticle homeobox 1	PRD class homeoboxes and pseudogenes	5013	ENSG00000115507	0.242421	0.441672	0.131482	0.876691	0.113309	0.855535
CATAATTAAGGTCCATATACTGTT	TRCN0000465270	GRIA1	glutamate ionotropic receptor AMPA type subunit 1	Glutamate ionotropic receptor AMPA type subunits	2890	ENSG00000155511	0.100914	0.83392	-0.0779521	0.945511	-0.0905551	0.925421
ACCTGAGCTCTACTCTGGTAGCAA	TRCN0000469339	AKR7A3	aldo-keto reductase family 7 member A3	Aldo-keto reductases	22977	ENSG00000162482	-0.053802	0.906895	-0.103389	0.915961	-0.155937	0.8178
GACACAACAGCATGCGGAGCAAAC	TRCN0000465271	AKR7A3	aldo-keto reductase family 7 member A3	Aldo-keto reductases	22977	ENSG00000162482	0.136873	0.895052	-0.0750065	0.979656	0.126678	0.955961
TAAGAAGCCTATATGGTCTCCTCT	TRCN0000465272	CD7	CD7 molecule	CD molecules|V-set domain containing	924	ENSG00000173762	-0.0739819	0.818942	-0.230147	0.627779	0.00925444	0.986186
ACGGAGATAGTGCAGGTACTCAAA	TRCN0000465273	SUGT1P1	SUGT1 pseudogene 1		441394	ENSG00000226823	-0.00197544	0.997155	0.093591	0.896845	0.0170646	0.982294
AATTCTCGGGCCTTAAGCACTAAC	TRCN0000465274	TUBA1C	tubulin alpha 1c	Tubulins	84790	ENSG00000167553	0.260333	0.418742	0.375805	0.306061	0.225981	0.666395
CTGGCGAGGCTTCTGCTGCCTTGG	TRCN0000465275	MAPKAP1	mitogen-activated protein kinase associated protein 1	MTOR complex 2	79109	ENSG00000119487	-0.0631059	0.879651	-0.0973689	0.904182	-0.0255852	0.978757
CCAAACACAGTAAAAGCTACAGCC	TRCN0000488441	GALK1	galactokinase 1		2584	ENSG00000108479	0.0667031	0.906071	-0.246472	0.812411	-0.110184	0.906851
TTAACCTATTAGATCGGCCGAGGG	TRCN0000491971	GALK1	galactokinase 1		2584	ENSG00000108479	-0.316038	0.665603	-0.139481	0.964561	0.0405972	0.990713
GATCAGAGAATTTTGGATAAAAAA	TRCN0000465276	GALK1	galactokinase 1		2584	ENSG00000108479	0.145753	0.835906	0.0980229	0.966633	0.298435	0.736988
ATTGATCGCCACCAACGTAGACCT	TRCN0000479672	GALK1	galactokinase 1		2584	ENSG00000108479	0.125519	0.879863	0.249756	0.918016	0.343316	0.71298
CATCTCTTCCAATATTACACACAT	TRCN0000465277	DYNLL1	dynein light chain LC8-type 1	Dyneins, cytoplasmic	8655	ENSG00000088986	0.00819281	0.979678	0.0150663	0.971989	-0.00962576	0.987869
CAGCACTGCACGGCCGCGGCCATT	TRCN0000465278	HLA-DPB1	major histocompatibility complex, class II, DP beta 1	Histocompatibility complex|C1-set domain containing	3115	ENSG00000223865	-0.18027	0.643134	-0.108602	0.904182	-0.0949642	0.904026
CCGTACTGCTAGGTGTGGAAGCTA	TRCN0000466727	HLA-DPB1	major histocompatibility complex, class II, DP beta 1	Histocompatibility complex|C1-set domain containing	3115	ENSG00000223865	-0.0306887	NA	0.0779858	NA	-0.06057	NA
CGAAGGCTAGCCAATTATGCATAT	TRCN0000472374	HLA-DPB1	major histocompatibility complex, class II, DP beta 1	Histocompatibility complex|C1-set domain containing	3115	ENSG00000223865	NA	NA	-0.0151355	NA	-0.0595891	NA
CAGTTCAGCTACACACAGTAATTT	TRCN0000465280	AAMDC	adipogenesis associated Mth938 domain containing		28971	ENSG00000087884	-0.012209	0.990447	-0.018726	0.994487	-0.513146	0.580406
GCCATTATGCCAACTTATAGTTTG	TRCN0000465281	HOMEZ	homeobox and leucine zipper encoding	ZF class homeoboxes and pseudogenes	57594	ENSG00000215271	0.0293382	0.92559	0.0238655	0.968005	0.08403	0.883149
TTCCCAGCGCTGCTCTCCTCGTAG	TRCN0000465282	MSMO1	methylsterol monooxygenase 1	Fatty acid hydroxylase domain containing	6307	ENSG00000052802	-0.160613	0.713363	0.0755673	0.941253	-0.206573	0.840573
CTCGCCTAGTACTGAAGGCTCTGC	TRCN0000472683	ATP6V0C	ATPase H+ transporting V0 subunit c	V-type ATPases	527	ENSG00000185883	-0.175017	0.535886	0.056454	0.939496	-0.0478057	0.947384
AGTCCTCGTGCTGAATCCCCGTCT	TRCN0000467314	ATP6V0C	ATPase H+ transporting V0 subunit c	V-type ATPases	527	ENSG00000185883	0.0208828	0.971479	-0.104013	0.958329	0.112019	0.892718
CGGCTGAAAAAAAGTGGGTGCGAG	TRCN0000465283	ATP6V0C	ATPase H+ transporting V0 subunit c	V-type ATPases	527	ENSG00000185883	-0.208848	0.325258	-0.240802	0.347898	-0.251856	0.441949
TGTTACAAGAGCCCCTCTGACCCG	TRCN0000465284	MIF4GD	MIF4G domain containing		57409	ENSG00000125457	-0.161383	0.668133	-0.213536	0.723764	-0.0965118	0.898943
ATGAAGCAAAAACATACAATAAAT	TRCN0000465286	TCP10L2	t-complex 10 like 2		401285	ENSG00000166984	0.0497073	0.961934	0.150498	0.958329	0.239143	0.854031
CCCACCGCCAACCTTGGGCGTTCT	TRCN0000465287	RECK	reversion inducing cysteine rich protein with kazal motifs		8434	ENSG00000122707	-0.050952	0.90924	0.0252096	0.977434	-0.172492	0.773114
TACTACAGACAATTCTCGAACTGT	TRCN0000473771	HHIPL2	HHIP like 2		79802	ENSG00000143512	0.0579494	0.895815	0.142569	0.808688	0.0647931	0.921964
TCGGGGTTTTAGCGGAATGCCGCG	TRCN0000465288	HHIPL2	HHIP like 2		79802	ENSG00000143512	-0.069437	0.921011	-0.181997	0.846533	-0.277279	0.688014
CATCACCGGTGACCCACTTACAAA	TRCN0000465289	KRT19	keratin 19	Keratins, type I	3880	ENSG00000171345	-0.0620698	0.898765	-0.054341	0.956069	-0.152699	0.838047
CTCATCTTCGCTGTGGTCCTGTTG	TRCN0000465290	KRCC1	lysine rich coiled-coil 1		51315	ENSG00000172086	0.0293056	0.946835	0.0216034	0.978849	0.140733	0.745858
TGGTCACCCCCCTTCGGCACCTGG	TRCN0000465291	CALM2	calmodulin 2	Endogenous ligands|EF-hand domain containing	805	ENSG00000143933	-0.0568792	0.893215	-0.0382438	0.966967	-0.0499692	0.95662
GGATCATGATACTATTCGCCTACT	TRCN0000479230	CALM2	calmodulin 2	Endogenous ligands|EF-hand domain containing	805	ENSG00000143933	0.0677058	0.884607	0.00163915	0.993654	-0.00991942	0.992816
ACTCTAACATCACAACCATTCACC	TRCN0000470188	CALM2	calmodulin 2	Endogenous ligands|EF-hand domain containing	805	ENSG00000143933	-0.0439489	0.929048	-0.0318453	0.973988	0.0189824	0.982674
TTCTACTGACGAGTCGGCTAAACG	TRCN0000481399	CALM2	calmodulin 2	Endogenous ligands|EF-hand domain containing	805	ENSG00000143933	0.0852973	0.845964	0.242493	0.67996	0.281493	0.57644
CTTGTGTCCGAAAAACGAACGGCA	TRCN0000465292	SLC25A48	solute carrier family 25 member 48	Solute carriers	153328	ENSG00000145832	-0.132237	0.681586	-0.0962889	0.904182	0.104642	0.872554
CCTCGATACTTAAATCTGTCCCAA	TRCN0000465293	C2orf88	chromosome 2 open reading frame 88	A-kinase anchoring proteins	84281	ENSG00000187699	-0.0920396	0.75184	-0.0592064	0.942436	-0.0680223	0.919458
CCCGTGTGTCGTACAAGTTACCCT	TRCN0000465294	MPP1	membrane palmitoylated protein 1	Membrane associated guanylate kinases|PDZ domain containing	4354	ENSG00000130830	-0.000303468	0.998307	-0.141345	0.950837	-0.0987236	0.954278
TCTCGACCAGTATCGAGGTCTCCA	TRCN0000488461	MPP1	membrane palmitoylated protein 1	Membrane associated guanylate kinases|PDZ domain containing	4354	ENSG00000130830	0.15763	0.835696	-0.0379981	0.985456	0.22226	0.859988
AAATGACTTTACGCTTTAAACGAT	TRCN0000474712	MPP1	membrane palmitoylated protein 1	Membrane associated guanylate kinases|PDZ domain containing	4354	ENSG00000130830	0.431443	0.387891	0.371767	0.804157	0.176552	0.914189
CAGCAGTATATACTTAGGCTTGGT	TRCN0000465295	OTOA	otoancorin	Deafness associated genes	146183	ENSG00000155719	NA	NA	-0.0112206	NA	NA	NA
CAAAAGTAGTTTCGTAATGAATAT	TRCN0000465297	C1orf210	chromosome 1 open reading frame 210		149466	ENSG00000253313	-0.0427784	0.903527	0.0311091	0.959143	0.023343	0.97165
ACAAGTGTAGACGTAAATCTCAAT	TRCN0000465298	FOXR2	forkhead box R2	Forkhead boxes	139628	ENSG00000189299	-0.867486	0.000942961	-0.632077	0.0222729	-0.884749	9.74574e-05
CCTTACTATAAAGAACGGAATGAC	TRCN0000465299	PPP2R3C	protein phosphatase 2 regulatory subunit B''gamma	Protein phosphatase 2 regulatory subunits	55012	ENSG00000092020	-0.157857	0.744829	-0.185545	0.875275	-0.207431	0.768888
GATCACCCTATTTGTGTGCCCGTT	TRCN0000470807	PPP2R3C	protein phosphatase 2 regulatory subunit B''gamma	Protein phosphatase 2 regulatory subunits	55012	ENSG00000092020	0.192714	0.570255	0.343823	0.451197	0.188043	0.742927
ACAAGGGACTACCACAAAACGTCA	TRCN0000465301	LCMT1	leucine carboxyl methyltransferase 1	Protein phosphatase 2 modulatory subunits|Seven-beta-strand methyltransferase motif containing	51451	ENSG00000205629	0.11189	0.799529	-0.0840422	0.931468	0.00840215	0.992112
CCTATTTTTCTCTCATCCACACGT	TRCN0000469584	LCMT1	leucine carboxyl methyltransferase 1	Protein phosphatase 2 modulatory subunits|Seven-beta-strand methyltransferase motif containing	51451	ENSG00000205629	0.0312182	0.948352	0.110009	0.890262	-0.0451287	0.951052
TCTGTCGGGCTGTTCGAGGAATTC	TRCN0000474989	ASB9	ankyrin repeat and SOCS box containing 9	Ankyrin repeat domain containing	140462	ENSG00000102048	-0.00957151	0.982806	0.201693	0.637806	0.211695	0.564888
AGCGCAAGTGCCCGGTGGGACTGC	TRCN0000465302	ASB9	ankyrin repeat and SOCS box containing 9	Ankyrin repeat domain containing	140462	ENSG00000102048	-0.00321525	0.994444	0.0120413	0.981371	-0.00368609	0.995767
AATTAATGTAGTTTTCACTTTCTC	TRCN0000465304	RRAGC	Ras related GTP binding C		64121	ENSG00000116954	0.280063	0.405794	0.358311	0.519043	0.32744	0.432733
AACGTATAACAGACTGGCGGCGAA	TRCN0000465305	PUS7L	pseudouridine synthase 7 like	Pseudouridine synthases	83448	ENSG00000129317	-0.363482	0.638084	-0.242397	0.934859	-0.232371	0.897499
CCTCACGCTTGTGAACTCGCTATA	TRCN0000476484	PUS7L	pseudouridine synthase 7 like	Pseudouridine synthases	83448	ENSG00000129317	0.194564	0.758251	0.17444	0.937543	-0.0987185	0.955961
TCCGCGTCGTTCTCTCACTGACAT	TRCN0000465306	SPATC1L	spermatogenesis and centriole associated 1 like		84221	ENSG00000160284	-0.118818	0.820591	-0.135361	0.946121	-0.238317	0.789179
CCGACAAATGACTTCGTTAGGTGT	TRCN0000465307	NUDT4	nudix hydrolase 4	Nudix hydrolase family	11163	ENSG00000173598	-0.138744	0.624073	-0.153955	0.821111	-0.220498	0.554291
GAGCCAATAGGTTGGGCTGGTAGC	TRCN0000465308	PCBD2	pterin-4 alpha-carbinolamine dehydratase 2		84105	ENSG00000132570	0.0754993	0.802979	0.0944175	0.896367	-0.0599636	0.919271
ATGAAACTCTTAGAACAAGTGTAC	TRCN0000465309	ADAMTSL1	ADAMTS like 1	I-set domain containing|ADAMTS like	92949	ENSG00000178031	0.213684	0.589849	0.315217	0.570985	-0.0101863	0.993147
GCACACGTCCTCGGGAGCTTGCGT	TRCN0000465310	FEZ1	fasciculation and elongation protein zeta 1		9638	ENSG00000149557	0.178256	0.581044	-0.0111077	0.994059	0.155344	0.784023
GCCAACATGTGCCCTCTAACCCGT	TRCN0000465311	ENOX2	ecto-NOX disulfide-thiol exchanger 2	RNA binding motif containing	10495	ENSG00000165675	-0.102318	0.752165	-0.00754127	0.996351	-0.0579819	0.937617
ACGATTGTTGGAAAAATCTGAGGT	TRCN0000465312	PAM16	presequence translocase associated motor 16	TIM23 complex	51025	ENSG00000217930	0.035487	0.920789	0.0597267	0.925345	0.0308211	0.955799
GCCTACCTGTGCTGAACTGAAAGG	TRCN0000465313	THSD4	thrombospondin type 1 domain containing 4	ADAMTS like	79875	ENSG00000187720	-0.185746	0.609073	-0.0168296	0.990216	-0.0362514	0.971247
AGCCAGTACTCTATTCCGAAGGCA	TRCN0000465314	FAM86EP	family with sequence similarity 86 member E, pseudogene		348926	ENSG00000251669	-0.189323	0.555049	-0.0511153	0.955391	-0.00640021	0.993564
ATCCGACCTACTTATATGGAAAGC	TRCN0000465315	NPRL3	NPR3 like, GATOR1 complex subunit	GATOR1 subcomplex	8131	ENSG00000103148	0.0865659	0.88065	0.118619	0.906948	0.0632621	0.948746
CTTTACACTATGACCCAGCCACCA	TRCN0000465316	GPATCH2	G-patch domain containing 2	G-patch domain containing|Protein phosphatase 1 regulatory subunits	55105	ENSG00000092978	0.102283	0.844423	0.0223311	0.992957	-0.0793422	0.955961
TACGGATACCTTGCGCACCCCACG	TRCN0000465317	DGCR2	DiGeorge syndrome critical region gene 2	C-type lectin domain containing	9993	ENSG00000070413	-0.0509389	0.910736	-0.0662945	0.94631	-0.12384	0.864958
TAAAACCAATTAGCCTCCCGTGAG	TRCN0000465318	FGFRL1	fibroblast growth factor receptor like 1	I-set domain containing|Ig-like cell adhesion molecule family	53834	ENSG00000127418	-0.0858956	0.836689	-0.185495	0.85131	-0.168171	0.789718
GTGTTCTATATCCATCTATCCCTC	TRCN0000479989	FGFRL1	fibroblast growth factor receptor like 1	I-set domain containing|Ig-like cell adhesion molecule family	53834	ENSG00000127418	0.172884	0.670429	0.113763	0.905796	0.24345	0.665097
TGCGTTATCAATCCAACCAGAGTG	TRCN0000468902	FGFRL1	fibroblast growth factor receptor like 1	I-set domain containing|Ig-like cell adhesion molecule family	53834	ENSG00000127418	-0.182223	0.618335	-0.175567	0.838072	-0.481632	0.106557
GGACCGAGACGTCTTAACCAATAT	TRCN0000465319	SMPDL3A	sphingomyelin phosphodiesterase acid like 3A		10924	ENSG00000172594	0.0283907	0.937307	-0.180174	0.698841	-0.0560965	0.935376
TCTATGAGACGTCATCGCGGCCTG	TRCN0000465320	APEX1	apurinic/apyrimidinic endodeoxyribonuclease 1	SET complex	328	ENSG00000100823	0.0606764	0.862715	0.0165541	0.98182	0.0384127	0.95772
TGCCGGACAAGCGTGTTTTGAGGA	TRCN0000481321	APEX1	apurinic/apyrimidinic endodeoxyribonuclease 1	SET complex	328	ENSG00000100823	-0.298004	0.101612	-0.321807	0.204414	-0.192193	0.585808
ACTGATACGCAAATTACATGTGGA	TRCN0000465321	LIPF	lipase F, gastric type	Lipases	8513	ENSG00000182333	0.089924	0.842804	0.104571	0.910307	0.0232176	0.981506
CTCTGAGACGCTGCAATCGACGAT	TRCN0000465322	TMEM35A	transmembrane protein 35A		59353	ENSG00000126950	0.00622498	0.984493	-0.0150559	0.986377	0.0328843	0.951439
CACTGGCTCCTTCTACCGCATGGG	TRCN0000465323	NAP1L1	nucleosome assembly protein 1 like 1		4673	ENSG00000187109	0.111144	0.822684	-0.106843	0.913202	-0.00872907	0.993543
TTTCGGCACTACCTGGTCAGCATA	TRCN0000465325	VAPB	VAMP associated protein B and C		9217	ENSG00000124164	0.160507	0.540892	0.116572	0.841922	0.0882727	0.880313
GCCTATTAACACACTAGCACTATA	TRCN0000465326	HSPB8	heat shock protein family B (small) member 8	Small heat shock proteins	26353	ENSG00000152137	0.0421431	0.961127	0.069771	0.972675	0.161535	0.894263
GCAGATTCCGCATCTGCAATCATT	TRCN0000491253	HSPB8	heat shock protein family B (small) member 8	Small heat shock proteins	26353	ENSG00000152137	-0.0171683	0.977186	0.00176959	0.993472	-0.172622	0.786091
AGAGGAATTTTACTATTGCCGGAT	TRCN0000479643	HSPB8	heat shock protein family B (small) member 8	Small heat shock proteins	26353	ENSG00000152137	0.0373399	0.948704	0.0780052	0.948015	-0.235647	0.811372
TATGCTCCCACTTTCACTCCAGTA	TRCN0000465327	CNPPD1	cyclin Pas1/PHO80 domain containing 1		27013	ENSG00000115649	-0.0213336	0.968184	0.120339	0.902089	0.138601	0.866509
GAACATATCAGACCAACTTTGTCT	TRCN0000478389	CNPPD1	cyclin Pas1/PHO80 domain containing 1		27013	ENSG00000115649	-0.0547901	0.916147	0.13136	0.870565	-0.019563	0.985513
ATCGAATCGTCGATAAACGTCTCT	TRCN0000489347	FCER1G	Fc fragment of IgE receptor Ig		2207	ENSG00000158869	0.0905257	0.853669	0.0203112	0.984184	0.00430823	0.995762
CGGGGACCCTCTCATCGACTCACT	TRCN0000465328	FCER1G	Fc fragment of IgE receptor Ig		2207	ENSG00000158869	-0.157576	0.494809	-0.16487	0.736316	-0.112499	0.793312
ACCGTGAAACGTCGCCTACGCACT	TRCN0000466758	KLHDC3	kelch domain containing 3		116138	ENSG00000124702	0.230649	0.520359	0.0270095	0.977591	-0.0187418	0.987383
AACAAGGCGTGAACCCCAGCCCAC	TRCN0000480272	KLHDC3	kelch domain containing 3		116138	ENSG00000124702	0.161811	0.818615	-0.109638	0.96295	0.00587716	0.996999
TACTTCCACCACCCCACACTTTTC	TRCN0000465329	KLHDC3	kelch domain containing 3		116138	ENSG00000124702	-0.0342669	0.906624	0.0489602	0.925461	0.0126534	0.981703
CGATGGGTATCCCTGACTGTTAGA	TRCN0000465330	EAF1	ELL associated factor 1		85403	ENSG00000144597	-0.0989429	0.790697	-0.088445	0.92575	-0.113875	0.864944
AAGGGCAGGACCAAACTTTCATAA	TRCN0000465331	FAIM	Fas apoptotic inhibitory molecule		55179	ENSG00000158234	NA	NA	NA	NA	NA	NA
GTTTCAGGAACTATCAATATATTA	TRCN0000472786	CAMKK1	calcium/calmodulin dependent protein kinase kinase 1		84254	ENSG00000004660	0.308631	0.600531	0.292844	0.893838	0.105328	0.95572
ATTGTATTCATGGAATAGACGTCA	TRCN0000465332	CAMKK1	calcium/calmodulin dependent protein kinase kinase 1		84254	ENSG00000004660	0.220254	0.732845	0.137338	0.956581	0.112991	0.948943
TCACCCGTAGTGGTGCCTTATAAC	TRCN0000492173	CAMKK1	calcium/calmodulin dependent protein kinase kinase 1		84254	ENSG00000004660	-0.0162926	0.983789	-0.325861	0.87183	-0.0359159	0.988202
ATTAGACTCCTCTTTCGAACACGT	TRCN0000491493	CAMKK1	calcium/calmodulin dependent protein kinase kinase 1		84254	ENSG00000004660	0.123086	0.904003	0.308424	0.915705	-0.0650419	0.982001
GGTATGAGCGCGGTGGTCAGGCCT	TRCN0000465333	MTERF1	mitochondrial transcription termination factor 1		7978	ENSG00000127989	-0.0792824	0.843094	0.0361721	0.960295	0.149095	0.792551
AATATATACATACAGGCTTACCTG	TRCN0000478788	MTERF1	mitochondrial transcription termination factor 1		7978	ENSG00000127989	0.436987	0.168637	0.121958	0.955366	0.453663	0.219696
ACGTCGTCGTCGGAAGCTCCGACC	TRCN0000465334	S100A16	S100 calcium binding protein A16	S100 calcium binding proteins|EF-hand domain containing	140576	ENSG00000188643	0.0696334	0.9024	0.0473602	0.983144	0.000697556	0.999419
ACTGCCCCGGTTCACTACGAAAGA	TRCN0000465336	FAM177A1	family with sequence similarity 177 member A1		283635	ENSG00000151327	0.0484462	0.892725	0.0304637	0.958918	-0.0647229	0.903396
CCGAGAAACCACCATATCACACGT	TRCN0000472858	CENPA	centromere protein A	Constitutive centromere associated network	1058	ENSG00000115163	-0.18426	0.410633	-0.118609	0.830003	-0.133936	0.67732
GTCAAATGTCTTGGATAACAATGT	TRCN0000465337	CENPA	centromere protein A	Constitutive centromere associated network	1058	ENSG00000115163	0.00660701	0.982887	0.118581	0.794974	0.106549	0.744944
GATCTCGCCGAGCCAAACTTGCCT	TRCN0000465338	MSI2	musashi RNA binding protein 2	RNA binding motif containing	124540	ENSG00000153944	0.0112845	0.9923	-0.044031	0.986681	-0.0711683	0.976529
CTGACGCTGTAATCCCGACCACGA	TRCN0000468295	MSI2	musashi RNA binding protein 2	RNA binding motif containing	124540	ENSG00000153944	-0.0330606	0.948733	-0.0271182	0.97929	0.0302519	0.973336
GCAAGTGGATTTAGGATTTTGTCT	TRCN0000465339	RPL34	ribosomal protein L34	L ribosomal proteins	6164	ENSG00000109475	0.173213	0.654203	0.10712	0.904924	-0.177909	0.797036
AACGATCCGCACGGGGCTGGTTCT	TRCN0000465340	P2RX5	purinergic receptor P2X 5	Purinergic receptors P2X|Minor histocompatibility antigens	5026	ENSG00000083454	0.176963	0.835696	-0.00533179	0.996414	-0.00573882	0.996078
TGGATACTAGCATGCCCCTATGTG	TRCN0000465341	RBMX	RNA binding motif protein X-linked	RNA binding motif containing	27316	ENSG00000147274	-0.295183	0.379265	-0.0741276	0.934562	0.0203089	0.982674
ATCTACGCTAGAGACGCTCTGGCC	TRCN0000479534	JAK3	Janus kinase 3	Jak family tyrosine kinases	3718	ENSG00000105639	0.0395575	0.977773	-0.136791	0.967882	0.422925	0.757236
CTCCTTCTTTCGTAAAACACAACA	TRCN0000465342	JAK3	Janus kinase 3	Jak family tyrosine kinases	3718	ENSG00000105639	0.172766	0.846423	0.204751	0.944092	0.17138	0.933242
GGAACCGAGAATTTTTTAAATAAA	TRCN0000488116	JAK3	Janus kinase 3	Jak family tyrosine kinases	3718	ENSG00000105639	-0.270068	0.743216	-0.454966	0.89257	-0.203637	0.945118
GAGTGCTGAAGTGTGACTTTCTCC	TRCN0000488408	JAK3	Janus kinase 3	Jak family tyrosine kinases	3718	ENSG00000105639	0.132688	0.909285	0.173898	0.956502	0.324847	0.837641
GCCTTGGGAGACATTCGGCGACTC	TRCN0000465344	JPT1	Jupiter microtubule associated homolog 1		51155	ENSG00000189159	-0.0517425	0.897597	0.11703	0.845237	0.207408	0.528145
ACAAAGGCTTGAAGTAACCCCAAC	TRCN0000465345	TEKT4	tektin 4	Tektins	150483	ENSG00000163060	-0.110757	0.834304	0.170587	0.853482	0.0987188	0.904348
TAGGGTCCGCGCCGTGCGTGGTAC	TRCN0000465348	TMCC2	transmembrane and coiled-coil domain family 2	Transmembrane and coiled-coil domain containing	9911	ENSG00000133069	-0.0959431	0.841682	0.0574403	0.952856	-0.160481	0.819962
TCTAAAATACATGATCTGAAATTC	TRCN0000465350	ANGPTL4	angiopoietin like 4	Fibrinogen C domain containing|Angiopoietin like	51129	ENSG00000167772	0.0101658	0.981122	-0.0803015	0.923373	0.0663298	0.915323
GCGCTCTGATTACTGATGGCAGGT	TRCN0000465351	YIPF5	Yip1 domain family member 5	Yip1 domain containing	81555	ENSG00000145817	-0.00772777	NA	0.0327366	NA	-0.0232709	NA
CAAGAACGGTTTTTTCTGCCATGC	TRCN0000475879	GTF2IRD2B	GTF2I repeat domain containing 2B		389524	ENSG00000174428	-0.109416	0.875473	0.111804	0.959666	-0.191482	0.881714
CGATCACCGATGTAAGTTTATTTC	TRCN0000469667	GTF2IRD2B	GTF2I repeat domain containing 2B		389524	ENSG00000174428	-0.164744	0.518206	-0.262928	0.398648	-0.146518	0.670091
GATGGCAATATAAGTGATGTTCTC	TRCN0000465352	GTF2IRD2B	GTF2I repeat domain containing 2B		389524	ENSG00000174428	NA	NA	NA	NA	0.01267	NA
ACTAATAACATTGGTCCGTTAACG	TRCN0000465353	ASS1	argininosuccinate synthase 1		445	ENSG00000130707	-0.0632034	0.931437	0.0930795	0.965383	-0.204073	0.860097
CCTCTCAAATCGAGATCTGATGTC	TRCN0000467990	ASS1	argininosuccinate synthase 1		445	ENSG00000130707	-0.162896	0.539665	0.0525612	0.949479	-0.062976	0.920223
TGCGAGTGCCCGGAAGGCCCCTTA	TRCN0000465354	CLDND1	claudin domain containing 1		56650	ENSG00000080822	-0.183381	0.656635	-0.301634	0.588089	-0.161988	0.815926
TTGATTTCCAGTGCGAGAAGACCG	TRCN0000465355	HMX2	H6 family homeobox 2	NKL subclass homeoboxes and pseudogenes	3167	ENSG00000188816	0.223916	0.740128	-0.134665	0.95868	0.188254	0.894263
CTTACTCGAGAAGCCTAGGAGATG	TRCN0000465358	ZNF302	zinc finger protein 302	Zinc fingers C2H2-type	55900	ENSG00000089335	-0.0353627	NA	0.070272	0.984813	-0.128249	NA
TCTCCCACCTAGTGTCGCATCTTA	TRCN0000478438	HSP90AA1	heat shock protein 90 alpha family class A member 1	Heat shock 90kDa proteins	3320	ENSG00000080824	0.0762876	0.929909	-0.102537	0.966438	-0.343738	0.721609
TGGTCTACGAGAATGCGCTCGCGA	TRCN0000465359	HSP90AA1	heat shock protein 90 alpha family class A member 1	Heat shock 90kDa proteins	3320	ENSG00000080824	-0.202241	0.776657	-0.095009	0.967412	-0.146864	0.9308
TTTCTCGGTTCTGGTCGACCCTAT	TRCN0000491541	HSP90AA1	heat shock protein 90 alpha family class A member 1	Heat shock 90kDa proteins	3320	ENSG00000080824	0.0490922	0.962346	-0.0592088	0.981247	-0.0901528	0.964032
AGACAGAAGGTACACGGATGGCGA	TRCN0000465360	ECH1	enoyl-CoA hydratase 1		1891	ENSG00000104823	0.0162041	0.985558	-0.0254171	0.988649	-0.0520583	0.980172
CCAAATCTATTTCTGTATCAGGAC	TRCN0000489343	P2RY2	purinergic receptor P2Y2	P2Y receptors	5029	ENSG00000175591	-0.20367	0.493448	-0.212989	0.730764	-0.0875525	0.905313
GGAACCTTAGAGGTTGTACTTGTC	TRCN0000465787	P2RY2	purinergic receptor P2Y2	P2Y receptors	5029	ENSG00000175591	-0.196287	0.651677	-0.0962795	0.935039	-0.0508764	0.956489
CACACGATAAGACCAAAGCAAGTG	TRCN0000465361	P2RY2	purinergic receptor P2Y2	P2Y receptors	5029	ENSG00000175591	-0.246006	0.588416	-0.217006	0.893838	-0.194925	0.84453
GCTTTAGCACGCGGGGGTTGGAAG	TRCN0000491893	P2RY2	purinergic receptor P2Y2	P2Y receptors	5029	ENSG00000175591	-0.194744	0.76842	-0.155333	0.945007	-0.0854421	0.955961
CCGTTCCGGCGGTTCACGTTACCG	TRCN0000465363	PLA2G1B	phospholipase A2 group IB	Phospholipases	5319	ENSG00000170890	-0.108311	0.776163	0.204474	0.795614	-0.102695	0.851337
ATAAGTCACATGACGACTGCGCCG	TRCN0000479491	PLA2G1B	phospholipase A2 group IB	Phospholipases	5319	ENSG00000170890	0.0667352	0.934208	0.145217	0.948654	0.262586	0.765888
GTCTTCGCCATCGCGTTCTGGAAC	TRCN0000465365	DOC2A	double C2 domain alpha	Synaptotagmin like tandem C2 proteins	8448	ENSG00000149927	0.307913	0.406172	0.220934	0.816675	0.279542	0.625179
CATTCTTCTTCGGCTCAAGACAAA	TRCN0000465366	ETNK2	ethanolamine kinase 2		55224	ENSG00000143845	0.130742	0.82347	0.103597	0.959732	0.244975	0.740619
GAAGTCACCAAGTGTTCGATTCTC	TRCN0000491659	ETNK2	ethanolamine kinase 2		55224	ENSG00000143845	0.297692	0.414618	0.0688184	0.972675	-0.0143764	0.993103
CGATAACATCTCGACTATGCAATA	TRCN0000471464	PXK	PX domain containing serine/threonine kinase like		54899	ENSG00000168297	-0.111013	0.829	-0.0909345	0.935261	-0.0937459	0.929574
CCCCCTCCTCTAAACAATTGGTAC	TRCN0000465367	PXK	PX domain containing serine/threonine kinase like		54899	ENSG00000168297	-0.214279	0.583656	-0.281352	0.667951	-0.136165	0.883732
ATCAGCGTATACCTCCCCGCCGTT	TRCN0000473061	DYRK3	dual specificity tyrosine phosphorylation regulated kinase 3		8444	ENSG00000143479	0.138509	0.783996	-0.0984451	0.959829	-0.00758548	0.994028
CTTTACCTAAGATGTTAGGCTCAT	TRCN0000489870	DYRK3	dual specificity tyrosine phosphorylation regulated kinase 3		8444	ENSG00000143479	0.0231166	NA	0.420143	0.893838	0.0316856	NA
CGTATGGTGGTGTCTAAAAGTCGA	TRCN0000488254	DYRK3	dual specificity tyrosine phosphorylation regulated kinase 3		8444	ENSG00000143479	-0.247227	0.386714	-0.377649	0.262346	-0.268952	0.531761
GCCACGCCGAGCGCAGACTGGTCG	TRCN0000465369	DYRK3	dual specificity tyrosine phosphorylation regulated kinase 3		8444	ENSG00000143479	-0.106528	0.840811	0.0243109	0.979456	-0.380252	0.551889
ACCTCTACGGAGATGCGAGGACGA	TRCN0000465370	SDF2L1	stromal cell derived factor 2 like 1		23753	ENSG00000128228	0.137042	0.72346	0.0618141	0.945583	0.0663623	0.928447
GTTCGGCAACTTGGTCATTCCTGG	TRCN0000465371	CUL3	cullin 3	Cullins	8452	ENSG00000036257	0.103743	0.924191	0.0238869	0.994487	-0.128428	0.957656
CCGACGGGGCTAGTGATCGCCAGG	TRCN0000465372	WFDC11	WAP four-disulfide core domain 11	WAP four-disulfide core domain containing	259239	ENSG00000180083	-0.061456	0.854584	-0.148853	0.763944	-0.0875999	0.853286
AGCACGGGCACTTTCCCCGGGACC	TRCN0000465373	NHLRC1	NHL repeat containing E3 ubiquitin protein ligase 1	Ring finger proteins	378884	ENSG00000187566	0.0211779	0.966668	-0.0220707	0.982101	-0.143217	0.791751
AAGCCATATTTCATAACCAGGTTG	TRCN0000465374	SPINT1	serine peptidase inhibitor, Kunitz type 1		6692	ENSG00000166145	0.0732263	0.931054	0.0112125	0.996414	0.109378	0.948138
TAACGATTTAATCCCGCAGACTTT	TRCN0000465375	CCDC148	coiled-coil domain containing 148		130940	ENSG00000153237	-0.0203496	0.966922	0.171349	0.756975	-0.0555219	0.946091
TCCTATATCCCGTTATGGATGAAT	TRCN0000472539	CCDC148	coiled-coil domain containing 148		130940	ENSG00000153237	0.0019188	NA	NA	NA	-0.0311232	NA
TGATCAGTTTTTGCCATGAGCGTT	TRCN0000481050	MAP3K6	mitogen-activated protein kinase kinase kinase 6	Mitogen-activated protein kinase kinase kinases	9064	ENSG00000142733	-0.623381	0.269446	-0.0881443	0.976903	0.105489	0.962615
CGCAATTACCGCCGTCAACACTGT	TRCN0000465376	MAP3K6	mitogen-activated protein kinase kinase kinase 6	Mitogen-activated protein kinase kinase kinases	9064	ENSG00000142733	0.0269889	0.981826	-0.281223	0.93041	-0.104478	0.96309
GCTTTACATTAAATTTCAAATCGT	TRCN0000467651	BMPR1A	bone morphogenetic protein receptor type 1A	Type 1 receptor serine/threonine kinases|CD molecules	657	ENSG00000107779	0.454856	0.2615	0.0464923	0.984813	0.0248155	0.992648
CTCCGATCCCGCGCCATTGGAACA	TRCN0000489757	BMPR1A	bone morphogenetic protein receptor type 1A	Type 1 receptor serine/threonine kinases|CD molecules	657	ENSG00000107779	0.0291274	0.967288	-0.116368	0.922001	-0.0980676	0.923956
ACACAAAGACGATGAGACGCTTTT	TRCN0000465377	BMPR1A	bone morphogenetic protein receptor type 1A	Type 1 receptor serine/threonine kinases|CD molecules	657	ENSG00000107779	-0.0835833	0.868487	-0.194616	0.865002	-0.218518	0.72399
ACTTAGACCCCAACGAAGTGAACA	TRCN0000465378	TNFRSF6B	TNF receptor superfamily member 6b	Tumor necrosis factor receptor superfamily	8771	ENSG00000243509	-0.123457	0.656257	-0.153177	0.819861	-0.206946	0.534248
ACGTGGGATAATGCGCGGCGTATT	TRCN0000465379	CRYGA	crystallin gamma A	Beta-gamma crystallins	1418	ENSG00000168582	0.10574	0.566798	0.0107912	0.977157	0.0746951	0.842923
ATAATCAGGTGTGAAATCTATCAG	TRCN0000465381	REEP2	receptor accessory protein 2	Receptor accessory proteins	51308	ENSG00000132563	-0.0684914	0.953945	0.173722	0.959732	-0.0117997	0.994773
GACGCGACGGTGTGGAGACCGTAT	TRCN0000465384	MGST3	microsomal glutathione S-transferase 3	Microsomal glutathione S-transferases	4259	ENSG00000143198	0.0524185	0.898929	0.0496699	0.941606	0.240789	0.459805
ATGGCGATGCACTGGCCCACATGA	TRCN0000465383	MGST3	microsomal glutathione S-transferase 3	Microsomal glutathione S-transferases	4259	ENSG00000143198	-0.663416	0.000153264	-0.545867	0.181931	-0.578395	0.0253542
CTACCTAATATATCTTACTAATCC	TRCN0000465385	RENBP	renin binding protein		5973	ENSG00000102032	-0.0147679	0.974948	0.0135293	0.98438	0.0543413	0.932405
TTGAGTTATACTACCGACGATTTG	TRCN0000465386	SLC37A3	solute carrier family 37 member 3	Solute carriers	84255	ENSG00000157800	0.0252904	0.983789	0.338272	0.928015	0.0184323	0.993397
GCTCCTCCCCAGGGTTGCAGGGTG	TRCN0000465387	S100A7	S100 calcium binding protein A7	S100 calcium binding proteins|EF-hand domain containing	6278	ENSG00000143556	0.0590438	0.910609	-0.0640732	0.957921	-0.0270945	0.980685
TCACCAAACTGTGCCACGGGTCGA	TRCN0000465389	STEAP1B	STEAP family member 1B	STEAP family	256227	ENSG00000105889	0.0635421	0.837069	-0.0769831	0.903147	-0.100712	0.803403
ATCGGCAAGCCATCCCTGGATCAC	TRCN0000465390	SHC1	SHC adaptor protein 1	SH2 domain containing	6464	ENSG00000160691	-0.0148451	0.984555	0.0239398	0.992957	0.102063	0.953041
GCGGCCTCTAACTACATTGATACC	TRCN0000491918	SHC1	SHC adaptor protein 1	SH2 domain containing	6464	ENSG00000160691	-0.131243	0.664008	-0.137083	0.830393	0.222038	0.517649
CATTGAACTGCGACTCCTCTGCGC	TRCN0000487947	PLK1	polo like kinase 1		5347	ENSG00000166851	-0.0890063	0.919567	-0.106162	0.964561	-0.308097	0.763407
CTGTAGTTTTTCCGGGCTATACTC	TRCN0000465391	PLK1	polo like kinase 1		5347	ENSG00000166851	-0.0400113	0.974758	-0.139518	0.96295	-0.276847	0.905126
TGCTCAGTAATGGCGAGCAGCACT	TRCN0000480002	ARHGAP8	Rho GTPase activating protein 8	Rho GTPase activating proteins|BCH domain containing	23779	ENSG00000241484	-0.229514	0.444542	-0.360072	0.515799	-0.158082	0.800753
AATTCTTTGTGAAACAGAGTACAT	TRCN0000465392	ARHGAP8	Rho GTPase activating protein 8	Rho GTPase activating proteins|BCH domain containing	23779	ENSG00000241484	0.165178	0.828229	0.10504	0.966633	0.317111	0.743392
AGGTTGAACTATACACTATACCTG	TRCN0000489116	PTK2	protein tyrosine kinase 2	Protein phosphatase 1 regulatory subunits|FERM domain containing|PTK2 family tyrosine kinases	5747	ENSG00000169398	0.313339	0.653396	-0.157499	0.959732	0.114206	0.961927
ACCCGTCAGACGGGGAGAATATCA	TRCN0000471115	PTK2	protein tyrosine kinase 2	Protein phosphatase 1 regulatory subunits|FERM domain containing|PTK2 family tyrosine kinases	5747	ENSG00000169398	0.0360469	0.978958	-0.0219919	0.994487	-0.188955	0.943076
CCGAGCTAACCTATAGCACCACCA	TRCN0000465393	PTK2	protein tyrosine kinase 2	Protein phosphatase 1 regulatory subunits|FERM domain containing|PTK2 family tyrosine kinases	5747	ENSG00000169398	-0.327407	0.612876	-0.231148	0.916652	0.0912182	0.958965
AATAAACTGGAATCAAGCGCCTCC	TRCN0000468945	SUB1	SUB1 homolog, transcriptional regulator		10923	ENSG00000113387	0.196585	0.716906	0.253541	0.885295	0.195639	0.855306
GGTAACAGCCCATGAAGGTGTATG	TRCN0000465394	SUB1	SUB1 homolog, transcriptional regulator		10923	ENSG00000113387	-0.0378131	0.926931	0.101238	0.798773	-0.0600726	0.905678
CCGACGGTGTTTCAAGTGTTGATG	TRCN0000466498	COL20A1	collagen type XX alpha 1 chain	Collagens|Fibronectin type III domain containing	57642	ENSG00000101203	-0.150124	0.593601	-0.168241	0.817675	-0.147256	0.776128
CCCGTTATTTACTGAGACAACGAC	TRCN0000465395	COL20A1	collagen type XX alpha 1 chain	Collagens|Fibronectin type III domain containing	57642	ENSG00000101203	-0.461447	0.203828	-0.314384	0.834428	-0.0998727	0.947843
ATCTATTCCAGACCAGTGACCACC	TRCN0000467707	SLC48A1	solute carrier family 48 member 1	Solute carriers	55652	ENSG00000211584	-0.115445	0.908864	-0.0915626	0.972789	-0.00718171	0.996078
ATGTGTGAGAATGTTATACCAGTC	TRCN0000465396	SLC48A1	solute carrier family 48 member 1	Solute carriers	55652	ENSG00000211584	0.114259	0.768418	0.0418325	0.959681	0.169003	0.759439
TGCCTTCTGTTCTGAAGACACACA	TRCN0000474485	HMGN2	high mobility group nucleosomal binding domain 2	Canonical high mobility group	3151	ENSG00000198830	-0.131078	0.616237	-0.150251	0.757664	-0.0925932	0.875439
CGTGTAGCACCTTCTGGCTCTCTA	TRCN0000465397	HMGN2	high mobility group nucleosomal binding domain 2	Canonical high mobility group	3151	ENSG00000198830	-0.183974	0.570236	-0.127283	0.878863	-0.173651	0.710465
CCCAGAGACAACCCGCAAACTTCG	TRCN0000465400	AGBL3	ATP/GTP binding protein like 3	M14 carboxypeptidases	340351	ENSG00000146856	-0.443248	0.101495	-0.243324	0.822254	-0.191795	0.711761
CACGCCTATTGTCCATGACACCGT	TRCN0000465401	CALML5	calmodulin like 5	EF-hand domain containing	51806	ENSG00000178372	-0.15199	0.731246	0.0155676	0.985347	0.0640298	0.941469
TTTGGGGCAGTGGTGCCCTACGGC	TRCN0000488178	FGFR2	fibroblast growth factor receptor 2	Receptor tyrosine kinases|CD molecules|I-set domain containing	2263	ENSG00000066468	-0.0678651	0.944517	-0.0565619	0.981247	-0.0577726	0.982001
CTAGCGAGATACATAGTTCGCTAC	TRCN0000465402	FGFR2	fibroblast growth factor receptor 2	Receptor tyrosine kinases|CD molecules|I-set domain containing	2263	ENSG00000066468	-0.0922813	0.886733	-0.0666177	0.972675	-0.0127728	0.993103
AAGTTCAAGTCTTTTTGTAGGCCG	TRCN0000487708	FGFR2	fibroblast growth factor receptor 2	Receptor tyrosine kinases|CD molecules|I-set domain containing	2263	ENSG00000066468	0.348669	0.476109	0.24237	0.915705	0.0747577	0.969498
ACTGTTTAAGGCTAGTTTATGATC	TRCN0000492076	FGFR2	fibroblast growth factor receptor 2	Receptor tyrosine kinases|CD molecules|I-set domain containing	2263	ENSG00000066468	0.307916	0.457917	-0.0502528	0.973586	-0.0444773	0.970299
TTTCTTCGCCTCATCTCCCTTGTC	TRCN0000491520	FGFR2	fibroblast growth factor receptor 2	Receptor tyrosine kinases|CD molecules|I-set domain containing	2263	ENSG00000066468	0.196162	0.799596	0.346902	0.846999	-0.00570639	0.996078
CTCACCCCTTCATGGGAGAACTCG	TRCN0000491431	FGFR2	fibroblast growth factor receptor 2	Receptor tyrosine kinases|CD molecules|I-set domain containing	2263	ENSG00000066468	0.264328	0.713747	-0.0138042	0.995162	-0.278731	0.853889
CGCCACTACCTCAGAATTGCTGAT	TRCN0000489718	FGFR2	fibroblast growth factor receptor 2	Receptor tyrosine kinases|CD molecules|I-set domain containing	2263	ENSG00000066468	-0.16897	0.762254	-0.264479	0.872435	-0.433012	0.494009
TCTTATTACGTTTGTAATGTCAAA	TRCN0000465403	ELOVL5	ELOVL fatty acid elongase 5		60481	ENSG00000012660	0.236885	0.610077	0.23451	0.742418	0.207556	0.680679
TCGGGACTCCCCCGGGGGTGGAAC	TRCN0000465404	OGFOD3	2-oxoglutarate and iron dependent oxygenase domain containing 3		79701	ENSG00000181396	-0.125371	0.746831	-0.0549534	0.955579	-0.0684439	0.930369
GCAACGCTATAACCCCTGCGCACA	TRCN0000478200	OGFOD3	2-oxoglutarate and iron dependent oxygenase domain containing 3		79701	ENSG00000181396	0.0388857	0.925387	0.0566233	0.945351	0.00819179	0.990912
CTATTGGGCCTCGGTGTAGCCCAA	TRCN0000473722	BCAN	brevican	Hyalectan proteoglycans|V-set domain containing|Sushi domain containing|C-type lectin domain containing	63827	ENSG00000132692	-0.200435	0.768522	-0.1143	0.962298	-0.197439	0.879426
GGGTTACTCTTTATCGCTAATTCC	TRCN0000465406	BCAN	brevican	Hyalectan proteoglycans|V-set domain containing|Sushi domain containing|C-type lectin domain containing	63827	ENSG00000132692	0.0769976	0.929909	-0.211427	0.928696	0.262827	0.78027
GCAGCCAAAGCAAGGATGCCCGGA	TRCN0000465407	HEY2	hes related family bHLH transcription factor with YRPW motif 2	Basic helix-loop-helix proteins	23493	ENSG00000135547	0.0803119	0.816754	0.201232	0.712887	0.047553	0.950455
ACCCAAGCTCCCTGTGTATTGAGA	TRCN0000491536	GPR180	G protein-coupled receptor 180		160897	ENSG00000152749	-0.0604581	0.882545	-0.19795	0.721606	0.0125606	0.986702
AGGGACTCCATCAGTGAATGTACC	TRCN0000465409	GPR180	G protein-coupled receptor 180		160897	ENSG00000152749	0.0279172	0.941187	0.0483913	0.941524	0.0239583	0.972793
GTCTAATCTTTCATAAAAATGCCG	TRCN0000465411	PEA15	proliferation and apoptosis adaptor protein 15	Death effector domain containing	8682	ENSG00000162734	0.115942	0.876509	0.315534	0.82203	-0.0488034	0.979124
GTTGCCGCCCGCTGCGTATAACAG	TRCN0000468083	PEA15	proliferation and apoptosis adaptor protein 15	Death effector domain containing	8682	ENSG00000162734	0.101572	0.929564	0.124096	0.966633	0.213192	0.908334
GAGTGACTGTGTTGATCTTGACTA	TRCN0000465413	HIGD1A	HIG1 hypoxia inducible domain family member 1A		25994	ENSG00000181061	0.156991	0.856343	0.288966	0.917148	0.0596055	0.981078
GGAGTCAAATCCGGATTTGAAGTG	TRCN0000491820	HIGD1A	HIG1 hypoxia inducible domain family member 1A		25994	ENSG00000181061	-0.0135819	0.979151	-0.0617425	0.952117	0.0784676	0.918352
TATCCTATGGACTTGTGATCTTGT	TRCN0000489712	HIGD1A	HIG1 hypoxia inducible domain family member 1A		25994	ENSG00000181061	-0.0390595	0.953077	0.121228	0.893477	0.0849044	0.912625
TCCAAGCCCTTTCCCTTGTTACTC	TRCN0000474021	RNF5	ring finger protein 5	Ring finger proteins	6048	ENSG00000204308	-0.124041	0.907245	0.095793	0.972989	-0.132191	0.954278
AGTCTCTATACCACGTTGATATCC	TRCN0000478442	RNF5	ring finger protein 5	Ring finger proteins	6048	ENSG00000204308	0.106521	0.796163	0.1211	0.863942	0.114267	0.858141
TTTGTTCTGCCATCCCTCGTATTC	TRCN0000465414	RNF5	ring finger protein 5	Ring finger proteins	6048	ENSG00000204308	-0.086747	0.910546	0.0714604	0.972789	-0.0505855	0.978543
TTGGACAAGTGATCATTCTAACCT	TRCN0000487774	ATF6B	activating transcription factor 6 beta	Basic leucine zipper proteins	1388	ENSG00000213676	0.0336505	0.935122	0.139313	0.776224	0.255178	0.529639
AGTCCGAGTGCTACAAAAACAAAT	TRCN0000465415	ATF6B	activating transcription factor 6 beta	Basic leucine zipper proteins	1388	ENSG00000213676	-0.0488353	0.935619	-0.187505	0.859715	0.0655236	0.943489
CACCCCAAGATATTCTTCGATTAC	TRCN0000465417	RPL30	ribosomal protein L30	L ribosomal proteins	6156	ENSG00000156482	-0.0906076	0.744174	-0.0397961	0.953212	-0.0641174	0.891157
GACCTTACCGCCTCTGTGCTATGT	TRCN0000479179	SYT16	synaptotagmin 16	Synaptotagmins	83851	ENSG00000139973	0.0391113	0.937848	-0.0594201	0.950091	0.156146	0.793686
AATATCTCAGCGAGGGGATTAATA	TRCN0000465420	SYT16	synaptotagmin 16	Synaptotagmins	83851	ENSG00000139973	0.188355	0.785879	0.269912	0.893838	0.245846	0.82931
TATATAACATACCCTTTCGAAGCT	TRCN0000465421	DYNC1H1	dynein cytoplasmic 1 heavy chain 1	Dyneins, cytoplasmic	1778	ENSG00000197102	-0.0115022	0.980607	0.321266	0.475483	0.00905695	0.988982
AACTCAGCGCCAGAGCCATAACGC	TRCN0000465422	OSMR	oncostatin M receptor	Fibronectin type III domain containing	9180	ENSG00000145623	0.151636	0.630801	0.199333	0.693612	0.0730009	0.909369
CAAGGTCACGGCCACGCTCGGAAA	TRCN0000465423	LINC00486	long intergenic non-protein coding RNA 486		285045	ENSG00000230876	-0.128801	0.55739	-0.120878	0.798032	0.0303944	0.95458
GAGCTTGGTGTTCGTCCACGAAGA	TRCN0000480078	TSNARE1	t-SNARE domain containing 1		203062	ENSG00000171045	0.0327819	0.959187	0.0670074	0.946388	0.13674	0.845542
AGAGGACCTCTTTCGGCACCTCGG	TRCN0000465424	TSNARE1	t-SNARE domain containing 1		203062	ENSG00000171045	-0.000887852	0.998226	0.0806446	0.939163	0.0610141	0.948943
AGGCCAAGTTCTGACCGGTTATAA	TRCN0000465425	TMEM80	transmembrane protein 80		283232	ENSG00000177042	-0.110856	0.617539	-0.0160707	0.984581	-0.216203	0.489642
GCAAACGGCGACAATCATTATAGC	TRCN0000465427	BRAT1	BRCA1 associated ATM activator 1		221927	ENSG00000106009	-0.0924925	0.757991	0.039939	0.953118	-0.117788	0.838046
TGTAATTCTTAACGTAACGTACCT	TRCN0000465428	ZNF641	zinc finger protein 641	Zinc fingers C2H2-type	121274	ENSG00000167528	-0.0431717	0.894156	-0.0465795	0.943269	-0.0789747	0.878421
GCTCTGGAGTCGTTACAGTTTAGG	TRCN0000465429	DTX4	deltex E3 ubiquitin ligase 4	Ring finger proteins	23220	ENSG00000110042	-0.11772	0.904003	-0.18918	0.95305	0.00455978	0.998086
GCGACATGGAAGAGCTAACTACAT	TRCN0000465430	KIAA1324L	KIAA1324 like		222223	ENSG00000164659	0.160762	0.822584	0.0467342	0.984319	0.0170749	0.993103
TCGACCCCCGCCGTCGCCAGGTTG	TRCN0000465431	TAC4	tachykinin 4	Endogenous ligands	255061	ENSG00000176358	0.00262301	0.99482	0.00889523	0.988501	-0.0523654	0.942275
CCTCGTCACCTTATTCTCTAAGCA	TRCN0000465432	A1BG	alpha-1-B glycoprotein	Immunoglobulin like domain containing	1	ENSG00000121410	-0.0967746	0.837049	-0.0611343	0.956259	0.000644614	0.998003
TACAGATGCCATTAACTCAATACA	TRCN0000465433	RWDD4	RWD domain containing 4		201965	ENSG00000182552	-0.0900405	0.782922	0.00228944	0.990276	0.00385348	0.994416
AATGCGTTATGTGTCGTTGCAGGT	TRCN0000465435	PLAT	plasminogen activator, tissue type		5327	ENSG00000104368	0.125504	0.871465	0.143077	0.95305	0.210081	0.856113
AATCGGCGTTGTGACCCGCCTTGA	TRCN0000465436	ATP1B1	ATPase Na+/K+ transporting subunit beta 1	ATPase Na+/K+ transporting subunits	481	ENSG00000143153	0.182948	0.860042	0.196622	0.950768	0.0624459	0.985841
ATTTCCATTAATTAGTAACCGTTT	TRCN0000465437	ZC2HC1A	zinc finger C2HC-type containing 1A	Zinc fingers C2HC-type	51101	ENSG00000104427	0.3505	0.316505	0.211608	0.827537	0.520738	0.308187
TCGCGTGACTATGAAGTCCGGGAA	TRCN0000465438	SLC25A30	solute carrier family 25 member 30	Solute carriers	253512	ENSG00000174032	-0.0623575	0.856846	0.204644	0.591374	0.0918147	0.840884
GCGCTGAGTGGGCAGAGTTCCATA	TRCN0000465440	CSTA	cystatin A	Cystatins, type 1	1475	ENSG00000121552	0.18903	0.412428	0.0644328	0.925481	0.136026	0.758612
CCTGACTAGTTGCCCATCCCATAG	TRCN0000465441	IFT80	intraflagellar transport 80	WD repeat domain containing|Intraflagellar transport proteins	57560	ENSG00000068885	0.0456674	0.970996	-0.0546021	0.98443	0.103004	0.971648
TCCGTTTATTTAGTTGATAAGTTG	TRCN0000472584	IFT80	intraflagellar transport 80	WD repeat domain containing|Intraflagellar transport proteins	57560	ENSG00000068885	0.00874341	0.994398	0.108988	0.971118	0.142279	0.948686
GCTCCCAAGCAGACGTAGGAGGGG	TRCN0000465442	PRICKLE3	prickle planar cell polarity protein 3	Prickle planar cell polarity proteins|LIM domain containing	4007	ENSG00000012211	-0.161929	0.725737	-0.162217	0.888359	-0.310518	0.572818
GGGTGATCCCACGCAGCTGAACCT	TRCN0000465443	SMIM2	small integral membrane protein 2		79024	ENSG00000139656	-0.184973	0.52889	-0.0427913	0.960119	-0.238879	0.59515
ATAGAGCGGTCCGTCAAAACTAGA	TRCN0000488186	FLT3	fms related tyrosine kinase 3	Receptor tyrosine kinases|CD molecules|Immunoglobulin like domain containing	2322	ENSG00000122025	0.298663	0.716906	-0.199429	0.946121	0.388887	0.75838
AGGTAGTCCCCCTCTAAAGGACGC	TRCN0000487906	FLT3	fms related tyrosine kinase 3	Receptor tyrosine kinases|CD molecules|Immunoglobulin like domain containing	2322	ENSG00000122025	-0.00498439	0.996213	0.264172	0.932053	-0.341137	0.816401
TTTGAATCTACGGTTTCAAGCTCA	TRCN0000487712	FLT3	fms related tyrosine kinase 3	Receptor tyrosine kinases|CD molecules|Immunoglobulin like domain containing	2322	ENSG00000122025	0.415494	0.52976	0.123133	0.968489	0.281837	0.853644
TTTCCCTAACCATGTGAATACAGC	TRCN0000465444	FLT3	fms related tyrosine kinase 3	Receptor tyrosine kinases|CD molecules|Immunoglobulin like domain containing	2322	ENSG00000122025	0.454182	0.470772	0.142069	0.964449	-0.118172	0.971492
CCCGCTTTCTAAAACTGGTAATCC	TRCN0000489221	FLT3	fms related tyrosine kinase 3	Receptor tyrosine kinases|CD molecules|Immunoglobulin like domain containing	2322	ENSG00000122025	-0.0716764	NA	-0.00412167	NA	-0.0453223	0.992209
TCCTTGCACTAACCTTCTTCTCTA	TRCN0000488279	FLT3	fms related tyrosine kinase 3	Receptor tyrosine kinases|CD molecules|Immunoglobulin like domain containing	2322	ENSG00000122025	0.108451	0.928972	0.113648	0.972675	0.00847534	0.996078
ATGGATCTGATGTTACCCCCACTT	TRCN0000488315	FLT3	fms related tyrosine kinase 3	Receptor tyrosine kinases|CD molecules|Immunoglobulin like domain containing	2322	ENSG00000122025	0.254074	0.685435	0.14236	0.956903	0.161634	0.922677
TCAGGAAACTCATGCTAGATCGAG	TRCN0000470643	FLT3	fms related tyrosine kinase 3	Receptor tyrosine kinases|CD molecules|Immunoglobulin like domain containing	2322	ENSG00000122025	NA	NA	NA	NA	NA	NA
GTGGGTAACAGGAGCAGAAACGGG	TRCN0000465445	GBP3	guanylate binding protein 3		2635	ENSG00000117226	0.138086	0.621047	0.163738	0.761655	0.0152867	0.982848
TTGACAGCCTACGGCAATACTGTC	TRCN0000465446	PRAMEF15	PRAME family member 15	PRAME family	653619	ENSG00000204501	0.264722	0.284298	0.141328	0.839406	0.125184	0.792932
ACTCTCAGAGATTCTTAGAGGTAA	TRCN0000465448	MSC	musculin	Basic helix-loop-helix proteins	9242	ENSG00000178860	-0.00975913	0.987575	-0.236861	0.917316	-0.26065	0.754048
CCCTTGGCCACCCGTCCCCTTTTA	TRCN0000465449	LSM2	LSM2 homolog, U6 small nuclear RNA and mRNA degradation associated	LSm proteins	57819	ENSG00000204392	-0.0147346	0.975736	-0.212984	0.736214	-0.175326	0.726443
CCGAAAGCAACTTGTTGGTTTCAC	TRCN0000465450	SH3BP5	SH3 domain binding protein 5		9467	ENSG00000131370	0.0175634	0.983991	0.000159853	0.997005	-0.0113203	0.993397
CATTCACGTCCACACCCTGCCGCC	TRCN0000473064	SH3BP5	SH3 domain binding protein 5		9467	ENSG00000131370	-0.0557402	0.944244	-0.0135087	0.994487	-0.0581111	0.977098
TGTCGGGTTGATTCAGGCCTCGAT	TRCN0000469422	RWDD3	RWD domain containing 3		25950	ENSG00000122481	-0.221288	0.254322	-0.178105	0.719372	-0.278098	0.252527
ACCGAGGTCTATATCCGGGTCAAT	TRCN0000465451	RWDD3	RWD domain containing 3		25950	ENSG00000122481	-0.00306611	0.9965	-0.0970718	0.921213	-0.155733	0.788287
ACTCTCTGTTATTACCTATAAACG	TRCN0000465452	PRKCE	protein kinase C epsilon	C2 domain containing protein kinases|AGC family kinases	5581	ENSG00000171132	0.144427	0.839664	-0.0535056	0.976403	0.0198627	0.992821
TCCGATTCCCGCTAGAGTGGAAAG	TRCN0000488914	PRKCE	protein kinase C epsilon	C2 domain containing protein kinases|AGC family kinases	5581	ENSG00000171132	-0.167665	0.835696	-0.248682	0.917316	-0.233326	0.838736
CGGTCTTCAACTTCCCTTTTGGCA	TRCN0000488864	PRKCE	protein kinase C epsilon	C2 domain containing protein kinases|AGC family kinases	5581	ENSG00000171132	-0.571213	0.192685	-0.140524	0.962831	-0.028724	0.991556
GCAGAAAACAATTTGCACCACATC	TRCN0000489143	PRKCE	protein kinase C epsilon	C2 domain containing protein kinases|AGC family kinases	5581	ENSG00000171132	-0.138292	0.714962	-0.112232	0.921481	-0.157453	0.805747
TGACGAGAATAAGATGAGGTGATC	TRCN0000465453	C8orf74	chromosome 8 open reading frame 74		203076	ENSG00000171060	-0.065573	0.89814	-0.155296	0.879852	-0.394752	0.468958
TGCGGGACTCTAGATTTATACGTA	TRCN0000465455	F3	coagulation factor III, tissue factor	CD molecules	2152	ENSG00000117525	-0.133463	0.743037	-0.230514	0.568218	-0.170016	0.681027
TACGGGCAGCTAATTAATAGCCAA	TRCN0000465456	NUDT16P1	nudix hydrolase 16 pseudogene 1		152195	ENSG00000246082	-0.064594	0.856949	-0.111346	0.893898	-0.0511669	0.933023
ACTCAATCTGAGCTGACAATACGA	TRCN0000465457	L3MBTL4	L3MBTL4, histone methyl-lysine binding protein	Sterile alpha motif domain containing|MBT domain containing	91133	ENSG00000154655	0.00053629	0.99742	0.0362868	0.970914	0.0717573	0.922093
GGAACTAAGGTATCGAAAGTCAGG	TRCN0000465458	GDI2	GDP dissociation inhibitor 2		2665	ENSG00000057608	0.0809474	0.835038	-0.119118	0.871504	0.0228176	0.980982
CCATCTGCTCGAATATGACCAGGT	TRCN0000465460	SPRY4	sprouty RTK signaling antagonist 4		81848	ENSG00000187678	-0.221066	0.423675	-0.271698	0.674231	-0.0252959	0.978757
TTCACAATTCCGATAGGGCGTGTC	TRCN0000465462	DNAJC17	DnaJ heat shock protein family (Hsp40) member C17	DNAJ (HSP40) heat shock proteins|RNA binding motif containing	55192	ENSG00000104129	-0.070816	0.94643	0.0302541	0.992912	0.0953037	0.962615
GACATATTAACCCTTGTCTACTCG	TRCN0000465464	MRFAP1L1	Morf4 family associated protein 1 like 1		114932	ENSG00000178988	-0.0420867	0.936664	-0.053458	0.954719	-0.0571542	0.940764
GCATGTTCTGACATTGTGCCTACG	TRCN0000468362	MRFAP1L1	Morf4 family associated protein 1 like 1		114932	ENSG00000178988	-0.0215779	0.963969	-0.0490876	0.955082	-0.0569352	0.937617
TGGTAGACTAATACCTAGCTCCGG	TRCN0000465466	R3HCC1L	R3H domain and coiled-coil containing 1 like		27291	ENSG00000166024	-0.00186113	0.997161	-0.100931	0.900154	-0.165962	0.712233
ATCCAGACACCCCATTGTTGGCTG	TRCN0000465467	PI3	peptidase inhibitor 3	WAP four-disulfide core domain containing	5266	ENSG00000124102	0.0100102	0.982049	-0.0299666	0.978664	-0.0925882	0.905419
CAAATAGAGTTTAAATCATGTATA	TRCN0000489802	PI3	peptidase inhibitor 3	WAP four-disulfide core domain containing	5266	ENSG00000124102	0.00236749	0.993442	0.0331952	0.952675	-0.0499214	0.913035
ATTCGTTTGTTTACACGGACATTG	TRCN0000465468	KCTD5	potassium channel tetramerization domain containing 5		54442	ENSG00000167977	0.233061	0.764743	0.318898	0.893838	0.0608266	0.981755
CCTGACATCCTCTCCATTGTTAGG	TRCN0000465469	PKD2L2	polycystin 2 like 2, transient receptor potential cation channel	Transient receptor potential cation channels	27039	ENSG00000078795	-0.131581	0.702996	-0.110977	0.904859	-0.214601	0.682533
GCCATTATACATATATCTAATTCC	TRCN0000465471	CLEC1B	C-type lectin domain family 1 member B	C-type lectin domain containing	51266	ENSG00000165682	-0.186679	0.87961	-0.05332	0.985754	-0.0523003	0.98795
TACCAGTTAAGATGCCCATATTGT	TRCN0000465973	TBC1D23	TBC1 domain family member 23		55773	ENSG00000036054	-0.183127	0.610174	-0.156568	0.872654	0.0218029	0.9833
TTACAGCAACTGCTGCAGTGGCAG	TRCN0000465472	TBC1D23	TBC1 domain family member 23		55773	ENSG00000036054	0.214591	0.585035	0.153832	0.891887	0.11074	0.891643
CCCTCCAGGCTGTGCGCTCCAAGG	TRCN0000465473	HCFC1R1	host cell factor C1 regulator 1		54985	ENSG00000103145	-0.117735	0.562527	-0.144079	0.768781	-0.0556449	0.884169
TCTCGCCGCCATCCATGCGACATT	TRCN0000465474	SCRN2	secernin 2		90507	ENSG00000141295	-0.021377	0.969887	0.113658	0.890043	0.0165641	0.984138
CATCAGGATTGACATACTACCTTC	TRCN0000468312	SCRN2	secernin 2		90507	ENSG00000141295	0.0803845	0.858166	0.0240377	0.980185	0.108981	0.868508
AAGCAACCACGATGACCGTACCTA	TRCN0000465475	FAM209B	family with sequence similarity 209 member B		388799	ENSG00000213714	0.165171	0.678329	0.182229	0.839365	0.170024	0.79596
ACAGTTACATAATATATGATCTCA	TRCN0000465477	DNAJC30	DnaJ heat shock protein family (Hsp40) member C30	DNAJ (HSP40) heat shock proteins	84277	ENSG00000176410	-0.0543984	0.870225	0.00347694	0.990748	-0.0537662	0.922416
GCCTGGGCGCCTGACCTGTTGATT	TRCN0000465478	RETREG3	reticulophagy regulator family member 3		162427	ENSG00000141699	-0.0635072	0.947769	-0.154451	0.950837	-0.201042	0.889464
CGCCACAGTTGATGACTAATCCAG	TRCN0000465479	COMMD8	COMM domain containing 8	COMM domain containing|CCC complex	54951	ENSG00000169019	-0.131357	0.590144	-0.0539683	0.938746	-0.164188	0.591981
CCATTATGGCCAACCTAAACGCTT	TRCN0000465483	NDUFV3	NADH:ubiquinone oxidoreductase subunit V3	NADH:ubiquinone oxidoreductase supernumerary subunits	4731	ENSG00000160194	-0.0553681	0.886168	-0.0739533	0.930927	-0.149617	0.80703
TAATAAAACCAACACCAACCGGAC	TRCN0000468614	NDUFV3	NADH:ubiquinone oxidoreductase subunit V3	NADH:ubiquinone oxidoreductase supernumerary subunits	4731	ENSG00000160194	-0.0915783	0.731914	-0.0144599	0.985427	-0.152663	0.640385
CGGAAGATATTGTACATCACAGAT	TRCN0000465484	DLST	dihydrolipoamide S-succinyltransferase		1743	ENSG00000119689	-0.17936	0.394331	-0.0429731	0.955189	-0.157457	0.611863
CAGATAGTCCCGAGAGCACTGCGA	TRCN0000466713	SPOCK3	SPARC (osteonectin), cwcv and kazal like domains proteoglycan 3	SPARC family	50859	ENSG00000196104	-0.103621	0.791767	-0.112575	0.908652	-0.0386287	0.969601
AAACATGAGATCAGGTGTTCACAT	TRCN0000465485	SPOCK3	SPARC (osteonectin), cwcv and kazal like domains proteoglycan 3	SPARC family	50859	ENSG00000196104	0.204382	0.559946	0.173275	0.839365	0.125968	0.858095
CTTCATACGAATATCCAGTACGGA	TRCN0000465486	SCML4	Scm polycomb group protein like 4	Sterile alpha motif domain containing	256380	ENSG00000146285	0.114929	0.666763	0.168714	0.681481	0.0129234	0.986619
AGTTACTTACTTAGACCATTCTAT	TRCN0000465487	SREK1	splicing regulatory glutamic acid and lysine rich protein 1	RNA binding motif containing	140890	ENSG00000153914	0.131093	0.681889	0.123601	0.880948	0.189117	0.756431
TGCAACCTTCTACTGTCCGTCGAG	TRCN0000465488	TMEM242	transmembrane protein 242		729515	ENSG00000215712	-0.216598	0.193795	-0.148031	0.80414	-0.115829	0.779065
GCCATAGCCATTCATCCCGAGCTT	TRCN0000466803	PTPN9	protein tyrosine phosphatase, non-receptor type 9	Protein tyrosine phosphatases, non-receptor type	5780	ENSG00000169410	-0.0224236	0.969135	-0.127682	0.889399	-0.0598174	0.945799
GTGGTAATTTTAACGGACCCTATA	TRCN0000465489	PTPN9	protein tyrosine phosphatase, non-receptor type 9	Protein tyrosine phosphatases, non-receptor type	5780	ENSG00000169410	0.121122	0.935997	-0.00396562	NA	0.0422567	NA
GCGGCCGACCCGTCATACTAATAA	TRCN0000489516	TMEM177	transmembrane protein 177		80775	ENSG00000144120	0.0641097	0.811781	-0.0367597	0.965824	0.0714643	0.866433
GAGATCAGAGCTTCTTTAACGTAA	TRCN0000465490	TMEM177	transmembrane protein 177		80775	ENSG00000144120	0.168	0.435601	0.273407	0.34858	0.213245	0.531231
ATCGAATGGTCTAGCAACGGAAGC	TRCN0000465491	EBNA1BP2	EBNA1 binding protein 2		10969	ENSG00000117395	0.0533429	0.910413	0.166649	0.827596	0.0222675	0.980546
GTATCAACCCGAAACAATTTACCT	TRCN0000465492	GLOD4	glyoxalase domain containing 4		51031	ENSG00000167699	0.0490474	0.873859	0.0566502	0.93343	0.224119	0.366835
TGGCCACTAGCGATCGCAATTTAG	TRCN0000474780	GLOD4	glyoxalase domain containing 4		51031	ENSG00000167699	-0.247998	0.235098	-0.0835113	0.904182	-0.2986	0.260452
CTCGCACGTAGCCTCCAGTGACCG	TRCN0000465493	AFTPH	aftiphilin		54812	ENSG00000119844	-0.109643	0.733049	-0.179704	0.65959	-0.155567	0.666395
CAGACCACATTCCGAAGATTATTA	TRCN0000465494	MAEL	maelstrom spermatogenic transposon silencer		84944	ENSG00000143194	-0.0650027	0.873329	-0.247388	0.558146	-0.178772	0.655859
CAATGGGAACAACATCACCCATAG	TRCN0000465495	PTMS	parathymosin		5763	ENSG00000159335	-0.117478	0.778316	0.0709876	0.941544	-0.0585243	0.94979
TTTCGGCCACACCAAGTTGAAAGT	TRCN0000465496	BARX1	BARX homeobox 1	NKL subclass homeoboxes and pseudogenes	56033	ENSG00000131668	0.0626813	0.943422	0.199028	0.928666	0.000578405	0.999783
ACCCGCCCGAGAACTTTAAAAATA	TRCN0000465498	MUSK	muscle associated receptor tyrosine kinase	Receptor tyrosine kinases|I-set domain containing|Immunoglobulin like domain containing	4593	ENSG00000030304	0.235341	0.700167	-0.0772031	0.972548	0.173191	0.910476
CAGTCTGCATCGTGCCGCATACGT	TRCN0000488630	MUSK	muscle associated receptor tyrosine kinase	Receptor tyrosine kinases|I-set domain containing|Immunoglobulin like domain containing	4593	ENSG00000030304	-0.0595048	0.900988	0.075707	0.936589	0.0570356	0.959144
ATGCCACCGGACCTGAGAAGATTG	TRCN0000473887	SNX16	sorting nexin 16	Sorting nexins	64089	ENSG00000104497	0.2411	0.519558	-0.101351	0.922674	0.0217372	0.982848
TGATATCTACTCCAGACAAAGCCG	TRCN0000465499	SNX16	sorting nexin 16	Sorting nexins	64089	ENSG00000104497	-0.211987	0.327474	-0.0646412	0.944143	-0.192513	0.616924
CTAACCAATAGCTGTCCCTCGACA	TRCN0000465500	PELO	pelota mRNA surveillance and ribosome rescue factor		53918	ENSG00000152684	0.0268916	0.966324	-0.123066	0.95305	0.0996843	0.911833
CTGAATGTTGTTTTAGAGTTACGA	TRCN0000465501	CBLB	Cbl proto-oncogene B	Ring finger proteins	868	ENSG00000114423	0.236433	0.683472	0.277287	0.885469	0.076739	0.97174
TTTTATCGGGCTCGTTCACTCGTA	TRCN0000468788	NDRG2	NDRG family member 2		57447	ENSG00000165795	0.13863	0.835906	0.17151	0.934084	0.251418	0.788094
AAGACGAAGACGTGCTCCCATTTC	TRCN0000465502	NDRG2	NDRG family member 2		57447	ENSG00000165795	0.185083	0.693547	0.0945619	0.924409	0.134205	0.888975
GACTGATGGCTCGCGAGCTCGCTT	TRCN0000465503	JUNB	JunB proto-oncogene, AP-1 transcription factor subunit	Basic leucine zipper proteins|Jun transcription factor family	3726	ENSG00000171223	-0.0880037	0.835729	-0.0475031	0.964265	-0.0308149	0.978331
AACGTCATGGCGTAACCGGCGGTC	TRCN0000466024	JUNB	JunB proto-oncogene, AP-1 transcription factor subunit	Basic leucine zipper proteins|Jun transcription factor family	3726	ENSG00000171223	0.0641055	0.944119	-0.159398	0.945358	0.119931	0.943257
CCTACGACCGATCGCTCAAAGTCC	TRCN0000465504	ZNF706	zinc finger protein 706		51123	ENSG00000120963	-0.177429	0.344506	-0.046891	0.936919	-0.0913401	0.81037
GTGCTCCTGGGTTCTGCCGGAACA	TRCN0000488210	SPHK1	sphingosine kinase 1		8877	ENSG00000176170	0.0901549	0.935447	-0.00779108	0.996414	-0.12882	0.961482
CCATTGGATCGGCCGCTGCTTATG	TRCN0000471522	SPHK1	sphingosine kinase 1		8877	ENSG00000176170	-0.148083	0.860122	-0.0612703	0.976403	-0.325152	0.761728
ATAGCCAAGTAGACCCTCATTTTT	TRCN0000467050	SPHK1	sphingosine kinase 1		8877	ENSG00000176170	0.10008	0.885033	0.202866	0.923209	0.156531	0.901672
TAATGGATGCATCAGGTTCCCCGT	TRCN0000489246	SPHK1	sphingosine kinase 1		8877	ENSG00000176170	0.0704566	0.941956	-0.158551	0.950623	-0.0952247	0.957221
TAAGCGGCACAAGTTCCCCTCGAC	TRCN0000465505	SPHK1	sphingosine kinase 1		8877	ENSG00000176170	0.0444388	0.948428	-0.0410862	0.982815	-0.285749	0.765888
GGTGGGTACCCTATCCTCACAGGC	TRCN0000488440	SPHK1	sphingosine kinase 1		8877	ENSG00000176170	-0.0719046	0.900292	0.0950601	0.938501	0.0944748	0.908241
CTCAGGCCATGTATTGCCCTAGCC	TRCN0000471252	RBKS	ribokinase		64080	ENSG00000171174	-0.00476645	0.994356	-0.23744	0.893838	0.0665482	0.969498
AACACATCACCCTCCGACACTGCC	TRCN0000487709	RBKS	ribokinase		64080	ENSG00000171174	0.0661086	0.906019	-0.111378	0.955186	-0.0937783	0.946421
TCGTCCTTCCAATCCCGCGTAAGT	TRCN0000489586	RBKS	ribokinase		64080	ENSG00000171174	0.0399492	0.97544	0.115245	0.967882	0.359487	0.795355
CAAGATAAGCGTCGGCCCTTGGTC	TRCN0000487710	RBKS	ribokinase		64080	ENSG00000171174	-0.0927408	0.843273	-0.178255	0.821111	0.0587179	0.937662
AACGAACAACTGCCAGGCCTATTC	TRCN0000465506	RBKS	ribokinase		64080	ENSG00000171174	0.182219	0.77065	0.202347	0.928666	0.142717	0.923899
GCTCGAGCGTCCCAGCTTCGCACC	TRCN0000465949	MTMR7	myotubularin related protein 7	Myotubularins|Phosphoinositide phosphatases	9108	ENSG00000003987	0.0631811	0.953286	-0.0690167	0.977324	-0.303816	0.830846
CTAAAGTGTTCGTGTCGTCAGGAT	TRCN0000465507	MTMR7	myotubularin related protein 7	Myotubularins|Phosphoinositide phosphatases	9108	ENSG00000003987	-0.111332	0.820069	-0.155144	0.888197	-0.154439	0.871011
AGACACAACGTTAATAATACAATT	TRCN0000465508	CRYBA4	crystallin beta A4	Beta-gamma crystallins	1413	ENSG00000196431	0.0197471	0.954486	0.100972	0.875155	-0.0361963	0.956729
CCTGTGTACTCGTGCACAGTCAAC	TRCN0000465509	BVES	blood vessel epicardial substance		11149	ENSG00000112276	-0.0686487	0.800288	-0.00165401	0.992501	0.0258953	0.965123
GCTCACAGAACCAACCGTATTATC	TRCN0000465657	BVES	blood vessel epicardial substance		11149	ENSG00000112276	0.136264	0.698076	0.141993	0.85489	0.271486	0.557124
TCTCCAGATTTCTTGGTATAGCAG	TRCN0000465510	POU5F2	POU domain class 5, transcription factor 2	POU class homeoboxes and pseudogenes	134187	ENSG00000248483	-0.0103554	0.980222	-0.011783	0.990498	0.0466478	0.937174
GCAAACATGCCGTACGGTATCAAG	TRCN0000465511	NHLRC4	NHL repeat containing 4		283948	ENSG00000257108	-0.0817002	0.855806	-0.175923	0.833218	-0.0634468	0.947617
TACGGGCCCGTGCACATTAAAAAG	TRCN0000465512	KRTAP9-2	keratin associated protein 9-2	Keratin associated proteins	83899	ENSG00000239886	-0.17006	0.514557	-0.153327	0.778595	-0.0539327	0.929888
TGCTCATTGTATTAAGGTGATTTC	TRCN0000465513	HRASLS5	HRAS like suppressor family member 5	HRAS like suppressor family	117245	ENSG00000168004	-0.118308	0.612093	-0.117957	0.843574	-0.022865	0.971358
ACGGCACTCTATACGGCCTTTGGT	TRCN0000465514	ZFP36L1	ZFP36 ring finger protein like 1	Zinc fingers CCCH-type	677	ENSG00000185650	0.181372	0.650854	-0.201362	0.922109	-0.042188	0.981193
TGCGCCCAGTGAATATCTAAAAAA	TRCN0000489690	PRPS1	phosphoribosyl pyrophosphate synthetase 1	Deafness associated genes	5631	ENSG00000147224	-0.444418	0.102223	-0.444174	0.433909	0.0131522	0.988855
GCGGCCCCCGTTGCGTCCTGAAAA	TRCN0000465515	PRPS1	phosphoribosyl pyrophosphate synthetase 1	Deafness associated genes	5631	ENSG00000147224	0.0511444	0.922806	0.0905287	0.925935	-0.0362331	0.976377
AGCTTGACGTCGCATAGTTTCCTT	TRCN0000473409	PRPS1	phosphoribosyl pyrophosphate synthetase 1	Deafness associated genes	5631	ENSG00000147224	0.0274667	0.963803	0.0557984	0.949338	0.272549	0.598045
CTGACAAAAATGTACAGTCACAAC	TRCN0000465516	PCLAF	PCNA clamp associated factor		9768	ENSG00000166803	-0.0386713	0.920822	0.10517	0.83848	0.0384721	0.939159
TCCGTGAAACATATGAGGCACTGA	TRCN0000465518	EIF4A3	eukaryotic translation initiation factor 4A3	DEAD-box helicases|Exon junction complex|Spliceosomal Bact complex|Spliceosomal P complex	9775	ENSG00000141543	-0.118101	0.71072	0.0023125	0.991342	0.00543192	0.992208
GGTTTCGGGGATAGACTCCTGTAG	TRCN0000471580	EIF4A3	eukaryotic translation initiation factor 4A3	DEAD-box helicases|Exon junction complex|Spliceosomal Bact complex|Spliceosomal P complex	9775	ENSG00000141543	0.00227425	0.995567	-0.0168085	0.987698	0.0227995	0.977266
CATCAGTGCAGATACTCGCAGCCG	TRCN0000465519	FUNDC2	FUN14 domain containing 2		65991	ENSG00000165775	-0.174534	0.558446	-0.0259709	0.978769	-0.0547621	0.945768
GGTGCTGGCGCTCAACTCCCTCAA	TRCN0000473526	FUNDC2	FUN14 domain containing 2		65991	ENSG00000165775	0.0876516	0.805556	0.146965	0.834492	-0.0366955	0.962398
CATACCCCTGGGACACATCATTGA	TRCN0000465520	NFE2	nuclear factor, erythroid 2	Basic leucine zipper proteins	4778	ENSG00000123405	-0.311306	0.329225	-0.221406	0.725953	-0.440077	0.165791
TTTTACGTACGTCTACTGTTGTTT	TRCN0000465521	ALG12	ALG12, alpha-1,6-mannosyltransferase	Dolichyl D-mannosyl phosphate dependent mannosyltransferases	79087	ENSG00000182858	0.33309	0.394266	0.286003	0.84138	0.059486	0.975759
GAATTTGCATACAAAGTAATAGGC	TRCN0000466199	RPL23A	ribosomal protein L23a	L ribosomal proteins	6147	ENSG00000198242	0.0441292	0.934524	0.103838	0.914495	0.302724	0.510015
CCAATGGATACCGTATTGCATTCA	TRCN0000477975	RPL23A	ribosomal protein L23a	L ribosomal proteins	6147	ENSG00000198242	-0.194693	0.401886	-0.13258	0.817174	-0.0241022	0.972797
GAATTGCGCGCTTCAACACGCTAT	TRCN0000465522	RPL23A	ribosomal protein L23a	L ribosomal proteins	6147	ENSG00000198242	0.0563342	0.898941	0.0692859	0.929998	0.209668	0.688835
GTACGGACATCCGCCAAAATCTAC	TRCN0000465523	PNPLA1	patatin like phospholipase domain containing 1	Patatin like phospholipase domain containing	285848	ENSG00000180316	0.0144665	0.987613	-0.0814656	0.967882	0.00303226	0.999318
TGCCGCAGGAAACGATTGATGACG	TRCN0000481325	PNPLA1	patatin like phospholipase domain containing 1	Patatin like phospholipase domain containing	285848	ENSG00000180316	-0.2161	0.296993	-0.123296	0.848173	-0.26868	0.267367
AACTTACCCTAGTGACAGCACTGC	TRCN0000470792	DNAJC10	DnaJ heat shock protein family (Hsp40) member C10	DNAJ (HSP40) heat shock proteins|Protein disulfide isomerases	54431	ENSG00000077232	0.13878	0.90272	-0.166337	0.959732	0.600286	0.621463
GCCATCGTCATACTCGTTGGTTCC	TRCN0000465524	DNAJC10	DnaJ heat shock protein family (Hsp40) member C10	DNAJ (HSP40) heat shock proteins|Protein disulfide isomerases	54431	ENSG00000077232	0.0578085	0.962035	0.067484	0.980291	-0.130763	0.9524
AGCAAGGGCTTCCCGTTAATATTT	TRCN0000469914	DNAJC10	DnaJ heat shock protein family (Hsp40) member C10	DNAJ (HSP40) heat shock proteins|Protein disulfide isomerases	54431	ENSG00000077232	0.0322072	0.956094	0.13321	0.879524	0.172622	0.803951
GGACTCATCTGGATCCTTTCTGTA	TRCN0000465525	KPNA5	karyopherin subunit alpha 5	Armadillo repeat containing|Importins	3841	ENSG00000196911	0.0903914	0.800315	0.0444521	0.957055	0.169169	0.722051
GCTCTACGTTCACAGACGAATCGT	TRCN0000478503	CKS1B	CDC28 protein kinase regulatory subunit 1B		1163	ENSG00000173207	0.059946	0.878945	0.00139384	0.992606	0.0594106	0.927589
GCACACCCGTGTCCCTTACAACCA	TRCN0000465526	CKS1B	CDC28 protein kinase regulatory subunit 1B		1163	ENSG00000173207	-0.0246951	0.945781	-0.0748298	0.916955	-0.0546576	0.92519
ACCATTAGCTTTGGCCTCTAATAT	TRCN0000465527	HACL1	2-hydroxyacyl-CoA lyase 1		26061	ENSG00000131373	0.0693121	0.783735	0.0500866	0.928572	0.00570017	0.989915
AAGCTCCCGCCGAATCAGTCTAAG	TRCN0000471578	HACL1	2-hydroxyacyl-CoA lyase 1		26061	ENSG00000131373	0.0934206	0.895699	-0.105571	0.959732	0.178354	0.869136
CACTATCCTACATTACGAAAAAAA	TRCN0000467947	RGS8	regulator of G protein signaling 8	Regulators of G-protein signaling	85397	ENSG00000135824	-0.0243094	0.953266	0.105905	0.856163	0.0242798	0.974586
TCTGCTTATGCAGCGCAATCAGAC	TRCN0000465528	RGS8	regulator of G protein signaling 8	Regulators of G-protein signaling	85397	ENSG00000135824	0.148694	0.621989	0.125993	0.889144	-0.00542122	0.99509
AGATTCAAATCAAGAGCTCCTCTT	TRCN0000474020	KLK3	kallikrein related peptidase 3	Kallikreins	354	ENSG00000142515	0.127487	0.921453	0.100844	0.977324	0.066921	0.983242
GCGACCGAAGTCTCACTATGCAGG	TRCN0000488950	KLK3	kallikrein related peptidase 3	Kallikreins	354	ENSG00000142515	-0.0685529	0.785221	0.000148131	0.991212	0.0470059	0.913041
GGTAGACCTCTTCCCCGACCCACC	TRCN0000465530	KLK3	kallikrein related peptidase 3	Kallikreins	354	ENSG00000142515	0.0103071	0.990791	-0.057253	0.973216	0.0507405	0.982001
CCATGCGAGGCGACAGGCGTTCAC	TRCN0000488572	KLK3	kallikrein related peptidase 3	Kallikreins	354	ENSG00000142515	-0.196361	0.318535	-0.0947695	0.872948	-0.111447	0.794835
TGACTCCTCTATTCTTTGGCACAT	TRCN0000465531	ANKRD13D	ankyrin repeat domain 13D	Ankyrin repeat domain containing	338692	ENSG00000172932	0.00400802	0.992952	-0.0303774	0.982245	-0.0457637	0.968708
TCCGCTAAGCCGGGTGGCATAATT	TRCN0000476082	ANKRD13D	ankyrin repeat domain 13D	Ankyrin repeat domain containing	338692	ENSG00000172932	-0.271658	0.655598	-0.158968	0.948654	-0.343286	0.729357
AATTCCCATTGTGATTGGGCCTGC	TRCN0000465533	ZNF101	zinc finger protein 101	Zinc fingers C2H2-type	94039	ENSG00000181896	0.429187	0.0420677	0.209143	0.76664	0.239761	0.606002
GACTCACCTACAGCCCCGATCGCG	TRCN0000465534	AIMP1	aminoacyl tRNA synthetase complex interacting multifunctional protein 1		9255	ENSG00000164022	0.176408	0.407472	0.136264	0.804651	-0.0178533	0.981056
GTTGCGGACCGGATACTGGCCCTC	TRCN0000465535	RPL15	ribosomal protein L15	L ribosomal proteins	6138	ENSG00000174748	0.17526	0.45173	0.192144	0.746288	0.178082	0.644152
ACACATTGTTACCGCCACGTTGAG	TRCN0000472843	RPL15	ribosomal protein L15	L ribosomal proteins	6138	ENSG00000174748	0.0812493	0.784154	0.0888879	0.895657	0.0939526	0.835451
GAATTGACCAGTTTTGTCTGCCTG	TRCN0000474404	RPL15	ribosomal protein L15	L ribosomal proteins	6138	ENSG00000174748	0.168375	0.527348	0.297082	0.172002	0.290507	0.161365
TCAAGTTTGCTTCTAAAAGTAATT	TRCN0000465536	ARHGEF10	Rho guanine nucleotide exchange factor 10	Rho guanine nucleotide exchange factors	9639	ENSG00000104728	0.168889	0.60964	0.00614238	0.99326	0.184879	0.723088
TCAACCGGGCACGCAACGACACAA	TRCN0000465537	GALNT1	polypeptide N-acetylgalactosaminyltransferase 1	Polypeptide N-acetylgalactosaminyltransferases	2589	ENSG00000141429	0.00730843	0.983095	-0.0750496	0.909393	-0.059335	0.905794
TGCGTGTCCTTAACCATCACACGT	TRCN0000488736	GALNT1	polypeptide N-acetylgalactosaminyltransferase 1	Polypeptide N-acetylgalactosaminyltransferases	2589	ENSG00000141429	-0.192989	0.508867	-0.12906	0.864213	-0.218805	0.637183
ATAACTACTAGACCTGACTGATGA	TRCN0000487916	GALNT1	polypeptide N-acetylgalactosaminyltransferase 1	Polypeptide N-acetylgalactosaminyltransferases	2589	ENSG00000141429	0.161175	0.667825	0.261165	0.75151	0.217305	0.711956
AATCGGGACTGATGGGCAGCATGG	TRCN0000465538	VWA5A	von Willebrand factor A domain containing 5A		4013	ENSG00000110002	0.303384	0.362705	0.111973	0.910713	0.159225	0.833914
TAAGCCCCTCGCCTTAATCTTTAC	TRCN0000465539	COQ7	coenzyme Q7, hydroxylase		10229	ENSG00000167186	-0.021033	0.97299	-0.0697893	0.946869	-0.00410876	0.996758
TCCCTCGACAATAACCTACTCAAA	TRCN0000465540	CXXC4	CXXC finger protein 4	Zinc fingers CXXC-type	80319	ENSG00000168772	0.0754423	0.790984	0.163393	0.690552	0.00203383	0.996294
ATGCTTTAGGGTCCTAAGCTCGTG	TRCN0000475265	MRPS24	mitochondrial ribosomal protein S24	Mitochondrial ribosomal proteins	64951	ENSG00000062582	0.377881	0.621095	0.222814	0.948759	0.0296072	NA
ATTACATGCATGTACGCTATACCG	TRCN0000465541	MRPS24	mitochondrial ribosomal protein S24	Mitochondrial ribosomal proteins	64951	ENSG00000062582	0.258689	0.352866	0.359141	0.301956	0.228571	0.665759
TCAATGTTTCTCCGGTTCTGATCG	TRCN0000465542	SRP54	signal recognition particle 54		6729	ENSG00000100883	0.000452843	0.9975	-0.0207568	0.98748	0.0879724	0.911738
ACCATTACCCTAGGTCTATTGGAA	TRCN0000468672	SRP54	signal recognition particle 54		6729	ENSG00000100883	0.0381109	0.936854	0.0850835	0.914866	-0.0235649	0.981729
GATCAGGACCTTAGTTCCATGCAC	TRCN0000465543	STAR	steroidogenic acute regulatory protein	StAR related lipid transfer domain containing	6770	ENSG00000147465	0.00771588	0.984614	0.116081	0.898869	0.224434	0.703323
ACATGTAGGAGTATCGATTGTGGC	TRCN0000465545	PEX19	peroxisomal biogenesis factor 19	Peroxins	5824	ENSG00000162735	0.0869843	0.776754	-0.0278452	0.978955	0.0367777	0.955309
GGTCATCTCACATTTCGTTTGACG	TRCN0000465548	MRPS25	mitochondrial ribosomal protein S25	Mitochondrial ribosomal proteins	64432	ENSG00000131368	0.060332	0.874452	0.0635538	0.926009	0.0523658	0.95042
CCCTTAACTCAAGAATGGTATGTG	TRCN0000465549	MLLT10	MLLT10, histone lysine methyltransferase DOT1L cofactor	PHD finger proteins	8028	ENSG00000078403	0.0127914	0.974174	0.0663316	0.916108	0.119329	0.786122
GCCTACCGAGGCATGCGCGGTGGC	TRCN0000465550	CSTF3	cleavage stimulation factor subunit 3	Cleavage stimulation factor subunits	1479	ENSG00000176102	-0.0599917	0.863815	0.0691438	0.916697	-0.0161192	0.984427
CCTATCATCCAGACGTTTAAGGCG	TRCN0000465551	MDK	midkine		4192	ENSG00000110492	-0.0245954	0.95753	-0.0770122	0.92377	-0.0831131	0.906402
GTGGGTCCATGGACACACGCAACC	TRCN0000465552	SERPINB3	serpin family B member 3	Serpin peptidase inhibitors	6317	ENSG00000057149	0.211903	0.529306	0.111866	0.894845	0.181203	0.702598
CTTCCTCATGCCCGGTCTTACAAT	TRCN0000465553	FANCI	FA complementation group I	FA complementation groups	55215	ENSG00000140525	-0.0587543	0.878776	0.0472712	0.958008	0.0329075	0.969012
ACCGCACTCGCACGGCGTGGGCAC	TRCN0000465554	FRMPD4	FERM and PDZ domain containing 4	PDZ domain containing|FERM domain containing	9758	ENSG00000169933	-0.131253	0.570243	-0.100483	0.888468	-0.0328895	0.957572
AGCCCGCTCACATCTTTTAGGTCA	TRCN0000465557	ANGEL2	angel homolog 2		90806	ENSG00000174606	-0.0799996	0.915746	0.0574272	0.978848	-0.0345698	0.988408
GGAATCCGAAAGTTGTGTGCCAAT	TRCN0000465558	SLCO4A1	solute carrier organic anion transporter family member 4A1	Solute carriers	28231	ENSG00000101187	-0.0917955	0.844352	-0.21573	0.816113	-0.240937	0.629079
AACGTCTACCTACTGGCACAAAAC	TRCN0000465559	BAIAP2	BAI1 associated protein 2	I-BAR domain containing	10458	ENSG00000175866	0.134235	0.867979	0.102865	0.966633	0.0161741	0.993333
ACTAGGAGTGACACGACGAAGCGT	TRCN0000465560	ZBTB45	zinc finger and BTB domain containing 45	Zinc fingers C2H2-type|BTB domain containing	84878	ENSG00000119574	-0.272529	0.522817	-0.334805	0.584018	-0.228531	0.700609
TTCGTCCCGGCAACTTTGAGGCCC	TRCN0000465561	TAF9B	TATA-box binding protein associated factor 9b		51616	ENSG00000187325	0.155472	0.628786	0.140511	0.850143	0.192244	0.700015
TCGGACTTTGTCTTACAAAATCAC	TRCN0000489926	JAK1	Janus kinase 1	FERM domain containing|Jak family tyrosine kinases	3716	ENSG00000162434	-0.0417395	0.971029	0.521812	0.703981	0.101795	0.962615
CTCTCCCACCCTTTATCTCAACTC	TRCN0000465562	JAK1	Janus kinase 1	FERM domain containing|Jak family tyrosine kinases	3716	ENSG00000162434	0.250441	0.780558	0.179981	0.957434	0.24785	0.890635
GCGCCAATAAGAGCGGCTGAAATA	TRCN0000488291	JAK1	Janus kinase 1	FERM domain containing|Jak family tyrosine kinases	3716	ENSG00000162434	-0.0182057	0.986747	0.419183	0.828534	0.242657	0.912851
GATGCTTGGTGCTCCAGTGGTACT	TRCN0000469058	ZDHHC7	zinc finger DHHC-type containing 7	Zinc fingers DHHC-type	55625	ENSG00000153786	0.0483992	0.910267	0.154762	0.850946	-0.00833878	0.993511
AGGCTCCTCGTGCCTCTTTCACAA	TRCN0000465563	ZDHHC7	zinc finger DHHC-type containing 7	Zinc fingers DHHC-type	55625	ENSG00000153786	0.173784	0.650225	0.118101	0.907984	0.0284236	0.977677
GATCTGTTTCGGGCACTAATAATT	TRCN0000469159	VPS53	VPS53, GARP complex subunit	Endosome-associated recycling protein (EARP) complex|Golgi associated retrograde protein (GARP) complex	55275	ENSG00000141252	0.121189	0.750371	-0.0388796	0.967249	0.0891933	0.901714
GATCAACGCACAGCAGCTATTTCC	TRCN0000465564	VPS53	VPS53, GARP complex subunit	Endosome-associated recycling protein (EARP) complex|Golgi associated retrograde protein (GARP) complex	55275	ENSG00000141252	0.0590889	NA	0.0955073	NA	0.0258003	NA
CTGGTAGACCGGTTTAAGCTAACG	TRCN0000466867	RIC8A	RIC8 guanine nucleotide exchange factor A	Armadillo-like helical domain containing	60626	ENSG00000177963	-0.253702	0.686175	-0.109262	0.966633	-0.0613799	0.976311
CCCAAATTCATTTCTTATAAAACC	TRCN0000465565	RIC8A	RIC8 guanine nucleotide exchange factor A	Armadillo-like helical domain containing	60626	ENSG00000177963	0.0896743	0.94303	0.287369	0.934084	-0.192203	0.94496
TATGGTTATTATAGCAGACTCGAC	TRCN0000465566	HLA-G	major histocompatibility complex, class I, G	Histocompatibility complex|C1-set domain containing	3135	ENSG00000204632	0.0501455	0.957668	-0.0267689	0.988871	-0.170904	0.905453
CTAAAACCATGTCTCAATATCTTT	TRCN0000465567	NUP37	nucleoporin 37	WD repeat domain containing|Nucleoporins	79023	ENSG00000075188	0.111672	0.708846	-0.128776	0.855566	0.0673091	0.907813
GCGGGCGTCCTAGTAGTAAACTCT	TRCN0000487996	NUP37	nucleoporin 37	WD repeat domain containing|Nucleoporins	79023	ENSG00000075188	0.244612	0.769593	0.0549636	0.984813	0.211051	0.917658
GTAATTTTTGTGACGAGATGCGTT	TRCN0000467361	WBP2NL	WBP2 N-terminal like	GRAM domain containing	164684	ENSG00000183066	0.223997	0.446386	0.210761	0.718559	0.270976	0.514213
ACTTCCTGGAGAGGGGCTAACAGT	TRCN0000465568	WBP2NL	WBP2 N-terminal like	GRAM domain containing	164684	ENSG00000183066	0.13014	0.665176	0.114575	0.849543	0.191246	0.627884
ACCTTAGACGCTCCTTTTCGCTGA	TRCN0000465569	TAC1	tachykinin precursor 1	Endogenous ligands	6863	ENSG00000006128	0.127907	0.563684	0.191891	0.661064	0.130878	0.747408
AAGTGGGAGAGTAAGTGCCTGGTC	TRCN0000465570	PRB4	proline rich protein BstNI subfamily 4	Proline rich proteins	5545	ENSG00000230657	0.152039	0.611724	0.0504941	0.943929	0.06803	0.915053
TGTAGCCATAGAGGTGAGCAAAGG	TRCN0000465571	RND1	Rho family GTPase 1	Rho family GTPases	27289	ENSG00000172602	-0.149442	0.545529	-0.240478	0.545453	-0.170492	0.676957
GATCAGCCTGATCAAGTAATAAAT	TRCN0000465572	ZFAND5	zinc finger AN1-type containing 5	Zinc fingers AN1-type	7763	ENSG00000107372	0.163004	0.621257	0.159243	0.815448	0.170284	0.698516
CTGCGTCGTTATTCGCTGTAGCAC	TRCN0000475353	ING5	inhibitor of growth family member 5	PHD finger proteins	84289	ENSG00000168395	0.228519	0.803835	-0.0311535	0.992423	0.0846409	0.976529
TCTGCAGTTCTGCTGTCACCGCTA	TRCN0000465573	ING5	inhibitor of growth family member 5	PHD finger proteins	84289	ENSG00000168395	-0.00875915	0.983714	0.0276628	0.969488	0.108596	0.820189
CCAAGCGACCCTCCATTGGGAGAC	TRCN0000465575	RNFT1	ring finger protein, transmembrane 1	Ring finger proteins	51136	ENSG00000189050	-0.100571	0.709135	-0.124144	0.824755	-0.0538312	0.925925
TTCAATATGGCCTGAGTCCGTGCG	TRCN0000465576	VTCN1	V-set domain containing T cell activation inhibitor 1	V-set domain containing|Immunoglobulin like domain containing	79679	ENSG00000134258	0.0337831	0.930647	0.108551	0.885943	0.183802	0.707149
TAGCCTGACCTATTGACCCCCAAT	TRCN0000465577	MORN3	MORN repeat containing 3		283385	ENSG00000139714	0.0763371	0.842791	0.119398	0.875905	0.00987836	0.987756
TGCATGACACCAAGGCCATCATCG	TRCN0000465578	UTP14A	UTP14A, small subunit processome component		10813	ENSG00000156697	-0.234683	0.753712	-0.0153103	0.994487	-0.183809	0.901672
AGACATTCACGATCATTTAAGTCT	TRCN0000465579	MRPS33	mitochondrial ribosomal protein S33	Mitochondrial ribosomal proteins	51650	ENSG00000090263	0.0357651	0.931223	0.116113	0.871692	-0.0614968	0.919928
TAACTTGACGAAAGGACCCTGTGC	TRCN0000465580	EIF4B	eukaryotic translation initiation factor 4B	RNA binding motif containing	1975	ENSG00000063046	0.117035	0.827903	-0.0822679	0.965805	-0.264471	0.790935
ACATACCTGGAATATGGGTGGTCG	TRCN0000474052	HGF	hepatocyte growth factor	Deafness associated genes	3082	ENSG00000019991	-0.0569739	0.919006	-0.0394941	0.965254	0.0840202	0.904186
GGAATTTGTCACGGTGGCAGCATC	TRCN0000476979	HGF	hepatocyte growth factor	Deafness associated genes	3082	ENSG00000019991	-0.0862365	0.869629	-0.171871	0.930398	-0.206977	0.832235
GAGGAACTTTTGAAGCTGCAGCAA	TRCN0000465581	HGF	hepatocyte growth factor	Deafness associated genes	3082	ENSG00000019991	-0.185335	0.629883	-0.0999241	0.927964	-0.0264704	0.98101
TTGCCCCAATCACATTTTCGGAAA	TRCN0000488903	AKT2	AKT serine/threonine kinase 2	Pleckstrin homology domain containing|AGC family kinases	208	ENSG00000105221	-0.2006	0.77065	-0.310589	0.825133	-0.27312	0.759353
CTATGATACTTTATCATCGTTCTT	TRCN0000489868	AKT2	AKT serine/threonine kinase 2	Pleckstrin homology domain containing|AGC family kinases	208	ENSG00000105221	-1.25486	1.09004e-07	-0.801311	0.00316815	-0.670808	0.0699613
CATCTATTTCCCGTCATATGACAA	TRCN0000472076	AKT2	AKT serine/threonine kinase 2	Pleckstrin homology domain containing|AGC family kinases	208	ENSG00000105221	0.0784201	0.884165	0.087905	0.93038	0.093203	0.907933
CAAAGCGCTGTATGATGGCGTGGG	TRCN0000465582	AKT2	AKT serine/threonine kinase 2	Pleckstrin homology domain containing|AGC family kinases	208	ENSG00000105221	-0.0939079	0.865063	-0.0098752	0.994692	-0.0132668	0.993103
AGTTCATCCGGCCACCCTCAACCA	TRCN0000465583	BUD13	BUD13 homolog	NTC associated proteins|Spliceosomal P complex	84811	ENSG00000137656	0.179516	0.642242	-0.426986	0.26791	-0.128824	0.871847
CGGTAAAACCACTATTTGGCCCGC	TRCN0000491387	ZNF169	zinc finger protein 169	Zinc fingers C2H2-type	169841	ENSG00000175787	-0.126339	0.77963	-0.248605	0.801609	-0.40268	0.328579
ACTCTCACTAACTTTTGCATTTCC	TRCN0000465584	ZNF169	zinc finger protein 169	Zinc fingers C2H2-type	169841	ENSG00000175787	-0.399822	0.545439	0.140085	0.959829	-0.284537	0.845776
AGAATCAACACGATTGCACTCCGA	TRCN0000465585	DCLRE1C	DNA cross-link repair 1C		64421	ENSG00000152457	0.0993785	0.929972	-0.100322	0.973216	0.244668	0.904689
TAGCCCTTTTAGGCTGACAGCTCG	TRCN0000471456	DCLRE1C	DNA cross-link repair 1C		64421	ENSG00000152457	-0.0969863	0.894527	0.0236025	0.992912	-0.0289095	0.989997
TGACTTTAATCGCTTTACTTAGAA	TRCN0000465586	ASAP2	ArfGAP with SH3 domain, ankyrin repeat and PH domain 2	ArfGAPs|Ankyrin repeat domain containing|Pleckstrin homology domain containing|BAR-PH domain containing	8853	ENSG00000151693	NA	NA	NA	NA	0.0328124	NA
TGAATTTGTTCTGTCGAGCGCGGC	TRCN0000465587	BYSL	bystin like		705	ENSG00000112578	-0.0578649	0.898368	-0.0131448	0.991383	-0.187945	0.61891
TTTATAATACCACTGGCCCTTGAT	TRCN0000465588	POLH	DNA polymerase eta	Xeroderma pigmentosum complementation groups	5429	ENSG00000170734	0.171926	0.799596	0.190171	0.932053	0.239343	0.818784
TCGGGACCCTACAGAATTAAACAT	TRCN0000465591	TAF5L	TATA-box binding protein associated factor 5 like	WD repeat domain containing	27097	ENSG00000135801	-0.0672977	0.844538	0.00991441	0.987166	0.0122942	0.983969
ATCTATTATAGAGTCCCGACGCCC	TRCN0000465592	ADAM30	ADAM metallopeptidase domain 30	ADAM metallopeptidase domain containing	11085	ENSG00000134249	0.368231	0.613452	0.0338227	0.992912	0.0754119	0.977794
GACTAGGTCGTTTTACTTTGCTGT	TRCN0000465594	C1QTNF4	C1q and TNF related 4	C1q and TNF related	114900	ENSG00000172247	0.0502039	0.911414	0.0245118	0.972491	0.0683502	0.906047
GACCCAACGGCATACCCTTGCCGA	TRCN0000465595	ZC3H11A	zinc finger CCCH-type containing 11A	Zinc fingers CCCH-type	9877	ENSG00000058673	0.00675434	0.989273	-0.0360859	0.978468	-0.103557	0.918221
TGATTAATGCACCGATCGCGCCCA	TRCN0000466413	SNX7	sorting nexin 7	Sorting nexins|PX-BAR domain containing	51375	ENSG00000162627	0.048311	NA	0.871694	0.634548	0.022704	NA
CATACGACGACCCCTCAGTGATGG	TRCN0000465597	SNX7	sorting nexin 7	Sorting nexins|PX-BAR domain containing	51375	ENSG00000162627	0.180218	0.868176	-0.09553	NA	-0.0711785	NA
AATAGGGTCGGAGACGCTATGTAC	TRCN0000465598	PCNA	proliferating cell nuclear antigen		5111	ENSG00000132646	NA	NA	NA	NA	0.0600136	NA
TTCGGGGGTCGTGACTCGAAGCCC	TRCN0000465599	MRPL16	mitochondrial ribosomal protein L16	Mitochondrial ribosomal proteins	54948	ENSG00000166902	0.301016	0.814909	0.163166	0.959829	0.122737	0.962271
GACCTATTTATTGCTCGGAAATTT	TRCN0000465600	MEI1	meiotic double-stranded break formation protein 1	Armadillo-like helical domain containing	150365	ENSG00000167077	0.0252826	0.982676	0.031996	0.992912	-0.0236272	0.993103
ATTTGATTAAGAACGGCCCGGTAA	TRCN0000465601	ABT1	activator of basal transcription 1		29777	ENSG00000146109	0.267469	0.543009	0.243569	0.904437	0.425309	0.412704
TAGCCAGCAAAGACTCCACTTCGG	TRCN0000472030	ABT1	activator of basal transcription 1		29777	ENSG00000146109	0.0901423	0.841583	-0.125461	0.896109	-0.149177	0.860687
ACCCGAAAACACTAATTGTTGGCA	TRCN0000465602	SLC25A17	solute carrier family 25 member 17	Solute carriers	10478	ENSG00000100372	0.0345313	0.906584	0.0129182	0.975309	0.000139429	0.996097
TAACCACCCTTTTATTTACAACGA	TRCN0000465604	GSTM4	glutathione S-transferase mu 4	Soluble glutathione S-transferases	2948	ENSG00000168765	-0.0133447	0.977313	-0.0488193	0.960037	-0.0166499	0.988629
CTACAAAATTAGTCGAGAGTACAG	TRCN0000465608	INIP	INTS3 and NABP interacting protein		58493	ENSG00000148153	-0.105122	0.680049	-0.0835468	0.906945	0.0248145	0.968039
AATAAATTTCGAACCAGTGAATAT	TRCN0000465609	ATP6V0E2	ATPase H+ transporting V0 subunit e2	V-type ATPases	155066	ENSG00000171130	0.262241	0.546059	0.343872	0.600987	0.286885	0.729502
AAAATTCCTGGGTCCCTCTTAGTT	TRCN0000489848	UCK2	uridine-cytidine kinase 2		7371	ENSG00000143179	0.25121	0.714401	-0.0308927	0.988665	0.34251	0.749453
CCTGTACCCGCACTACGTGTTGTA	TRCN0000465610	UCK2	uridine-cytidine kinase 2		7371	ENSG00000143179	-0.0172975	0.97715	-0.134533	0.903625	-0.0187194	0.988587
CGTGTTCTCGGGGCCATCCACCCA	TRCN0000479497	UCK2	uridine-cytidine kinase 2		7371	ENSG00000143179	-0.178884	0.660095	0.053688	0.959648	-0.216922	0.73658
CGCACCATGCACTAGAGCTTTTTT	TRCN0000481346	UCK2	uridine-cytidine kinase 2		7371	ENSG00000143179	-0.224227	0.569432	-0.145446	0.903649	-0.239565	0.780767
GCAAGATCCGAATCGCGACCCCGG	TRCN0000465611	GNPTG	N-acetylglucosamine-1-phosphate transferase subunit gamma	MRH domain containing	84572	ENSG00000090581	0.0079584	0.982904	0.00767011	0.988084	-0.0879421	0.877666
TACCCCGGGAGATTTTAATAAGAC	TRCN0000465612	EIF4H	eukaryotic translation initiation factor 4H	RNA binding motif containing	7458	ENSG00000106682	-0.049338	0.88531	-0.0976556	0.875107	-0.127955	0.758927
CGATCATCGCACGGGACACGTACT	TRCN0000465613	BLCAP	BLCAP, apoptosis inducing factor		10904	ENSG00000166619	-0.191834	0.835906	-0.0957075	0.969064	-0.0730062	0.976311
CCCGACAGTAGCACTCATTGCTGG	TRCN0000465614	C17orf47	chromosome 17 open reading frame 47		284083	ENSG00000181013	0.00681644	NA	NA	NA	0.0185231	NA
TCCCAGAAATACCACCCCCGTACA	TRCN0000465615	SPATA2	spermatogenesis associated 2	Protein phosphatase 1 regulatory subunits	9825	ENSG00000158480	-0.0823846	NA	-0.109621	NA	NA	NA
GCGATCTCTTAACCCCAAGTATGA	TRCN0000465616	MRPL44	mitochondrial ribosomal protein L44	Mitochondrial ribosomal proteins	65080	ENSG00000135900	0.0797048	0.875412	0.295384	0.67343	0.129172	0.887245
TAAGAGATCCAGATACTGAGTTCG	TRCN0000465618	MMP2	matrix metallopeptidase 2	M10 matrix metallopeptidases	4313	ENSG00000087245	-0.14678	0.761679	-0.00375309	0.996188	-0.105912	0.908223
GGATATAACAACTGAGTCGGCTGG	TRCN0000465620	SFN	stratifin	14-3-3 phospho-serine/phospho-threonine binding proteins	2810	ENSG00000175793	-0.105975	0.721331	-0.041059	0.957921	-0.0411719	0.957227
CCTCTAGGTTTTTTGGTAACTTAA	TRCN0000480299	SFN	stratifin	14-3-3 phospho-serine/phospho-threonine binding proteins	2810	ENSG00000175793	-0.346602	0.591201	-0.224343	0.932053	-0.0802998	0.971648
AACAAAACTCGTAACTTCCCCATC	TRCN0000465621	RPIA	ribose 5-phosphate isomerase A		22934	ENSG00000153574	0.0516869	0.905275	0.110537	0.895443	-0.031403	0.973071
TGCCTTCGGTTAAAAAAGCTCTCC	TRCN0000465622	CDX1	caudal type homeobox 1	HOXL subclass homeoboxes	1044	ENSG00000113722	-0.116962	0.771921	0.0996625	0.903653	-0.0545571	0.95437
CGGCCCGGGGGTTTCGGCTACCCA	TRCN0000465623	PCDHB11	protocadherin beta 11	Clustered protocadherins	56125	ENSG00000197479	-0.341893	0.561443	0.137102	0.956581	-0.366391	0.71656
GGTTGCTTGTGCATCGGCGCTTCT	TRCN0000465624	LHFPL4	LHFPL tetraspan subfamily member 4	LHFPL tetraspan proteins	375323	ENSG00000156959	0.165747	0.670547	0.203111	0.814418	0.168821	0.795485
TGATGAGACTCATTATACCTCCAG	TRCN0000465625	PDCD2L	programmed cell death 2 like		84306	ENSG00000126249	-0.0815417	0.765823	-0.113782	0.861526	-0.0194402	0.98052
CTGGGTGGGATTCAGCACTTATCT	TRCN0000465626	TROVE2	TROVE domain family member 2		6738	ENSG00000116747	0.0392029	0.937693	-0.0310895	0.981835	0.184928	0.758792
GGCTTTCACCACGTCGAGGTGCGA	TRCN0000465629	KLHDC9	kelch domain containing 9		126823	ENSG00000162755	0.0448772	0.937777	0.108229	0.959732	-0.0487489	0.978174
GCGACCAAGGTCATTCATAAAGCG	TRCN0000470419	KLHDC9	kelch domain containing 9		126823	ENSG00000162755	-0.0706115	0.817367	0.0983058	0.852643	0.0222764	0.974439
CGAACACGGAACCAGTCGTCGGCC	TRCN0000478387	KLHDC9	kelch domain containing 9		126823	ENSG00000162755	-0.156756	0.553642	-0.330263	0.321905	-0.210935	0.582857
GATCACGGGGCAACCCTTCGATAC	TRCN0000465631	TAOK3	TAO kinase 3	Mitogen-activated protein kinase kinase kinases	51347	ENSG00000135090	-0.315234	0.656115	0.0645493	0.983026	-0.310639	0.82829
CCATAATCCTTCGCATTACGCTCA	TRCN0000488252	TAOK3	TAO kinase 3	Mitogen-activated protein kinase kinase kinases	51347	ENSG00000135090	-0.0733103	0.936374	0.182005	0.935734	0.0283978	0.992648
CCTCCAGGGTGACACTCCAAACGT	TRCN0000487785	TAOK3	TAO kinase 3	Mitogen-activated protein kinase kinase kinases	51347	ENSG00000135090	-0.104374	0.916969	-0.183489	0.950768	-0.0843248	0.975396
GATACCCTCCTCTGCCCGTTCCAC	TRCN0000465632	DDX31	DEAD-box helicase 31	DEAD-box helicases|Protein phosphatase 1 regulatory subunits	64794	ENSG00000125485	-0.0665907	0.897642	0.0538879	0.950088	0.0619165	0.948399
GCTCGGGCCTAAACTGCCCCCTAG	TRCN0000472602	TPMT	thiopurine S-methyltransferase	Seven-beta-strand methyltransferase motif containing	7172	ENSG00000137364	0.112655	0.775817	0.0500568	0.958008	0.211251	0.71338
ATGCCCAGAACTTGCATGTCAAAG	TRCN0000465633	TPMT	thiopurine S-methyltransferase	Seven-beta-strand methyltransferase motif containing	7172	ENSG00000137364	0.164995	0.872928	0.0934671	0.973216	0.584088	0.628865
AGCACCTTTTTCTGGCCAACCAGT	TRCN0000465634	SGCZ	sarcoglycan zeta		137868	ENSG00000185053	0.0211778	0.950611	0.0668845	0.918234	0.018753	0.975595
GCCCCCCAGGAGACTATCTATCCT	TRCN0000465635	TUSC7	tumor suppressor candidate 7	Long non-coding RNAs (published)	285194	ENSG00000243197	-0.0274356	0.934035	-0.145667	0.762525	-0.0124116	0.986217
GCTAAATAAATTACTAAAGGACGC	TRCN0000465638	ERG	ETS transcription factor ERG	ETS transcription factor family	2078	ENSG00000157554	0.0843658	NA	-0.0117211	NA	-0.0149224	NA
ACCTGGATACACCATGGAGCCTGT	TRCN0000465639	KDELC1	KDEL motif containing 1	Glycosyltransferase family 90	79070	ENSG00000134901	0.0165519	NA	0.0478931	NA	NA	NA
AGCTAGGATTAACCCGATAGTATT	TRCN0000465643	WRAP53	WD repeat containing antisense to TP53	WD repeat domain containing	55135	ENSG00000141499	0.10763	0.797352	-0.116756	0.890111	0.0698867	0.938894
AGCCTGGACAAAGCTTGTTGCAAA	TRCN0000465644	AAAS	aladin WD repeat nucleoporin	WD repeat domain containing|Nucleoporins	8086	ENSG00000094914	-0.0869427	0.791401	-0.140013	0.855805	-0.275059	0.422658
ATATGAATTGTTTCGATTTCCCGC	TRCN0000465645	ATP1B2	ATPase Na+/K+ transporting subunit beta 2	ATPase Na+/K+ transporting subunits	482	ENSG00000129244	0.28961	0.508629	-0.0134197	0.994487	0.0997467	0.948863
ACACGAGAGACGTAACAAGATACC	TRCN0000478506	AVIL	advillin	Gelsolin/villins	10677	ENSG00000135407	-0.122604	0.714691	-0.152792	0.805058	-0.00762929	0.99296
TTCTAAGGCGATGGCTCCTTCTAA	TRCN0000465646	AVIL	advillin	Gelsolin/villins	10677	ENSG00000135407	0.211551	0.720728	0.0576003	0.980749	0.0337525	0.988671
CACTATAGCTTGACTATCTACCGT	TRCN0000472138	MKRN3	makorin ring finger protein 3	Ring finger proteins	7681	ENSG00000179455	-0.0870718	0.890518	-0.119965	0.924612	-0.0905946	0.923247
CCAGCAATTCATGAAATTGACCTA	TRCN0000465647	MKRN3	makorin ring finger protein 3	Ring finger proteins	7681	ENSG00000179455	-0.09352	0.765003	-0.184818	0.740107	-0.0607561	0.917337
GGTCCATACGCCGCTCTGTGTCCA	TRCN0000466087	TMEM14B	transmembrane protein 14B		81853	ENSG00000137210	0.0186764	0.969661	0.10277	0.908671	0.00710375	0.992661
CAGCGGCAAACTCAGCTGAACCGA	TRCN0000465648	TMEM14B	transmembrane protein 14B		81853	ENSG00000137210	0.0448852	0.910375	0.0494987	0.946316	0.0379323	0.958052
AACACTTAGCGCTCAAGGTAGGTC	TRCN0000465833	TMEM14B	transmembrane protein 14B		81853	ENSG00000137210	0.280893	0.339193	0.172212	0.84216	0.0344974	0.974608
GAACCAGTCCTCTACACTAACCAT	TRCN0000470596	TMEM14B	transmembrane protein 14B		81853	ENSG00000137210	0.360159	0.432503	0.229735	0.915705	0.257072	0.809504
CCATCATTCCCGACTGACCGATCC	TRCN0000465649	HAVCR1	hepatitis A virus cellular receptor 1	CD molecules|V-set domain containing	26762	ENSG00000113249	-0.0618459	0.863011	-0.165789	0.831395	-0.0834504	0.899178
CCTAGTCTATGCGGTTCAACCCGC	TRCN0000488092	FASTK	Fas activated serine/threonine kinase	FASTK mitochondrial RNA binding family	10922	ENSG00000164896	0.0479821	0.932933	-0.19215	0.868599	-0.0988917	0.908692
TGATTAGTGTGTGAATCGATTACC	TRCN0000491652	FASTK	Fas activated serine/threonine kinase	FASTK mitochondrial RNA binding family	10922	ENSG00000164896	0.039139	0.941049	-0.172784	0.893424	0.298408	0.574567
GTCAAGCACAGCGTGAGCCTTCCG	TRCN0000465650	FASTK	Fas activated serine/threonine kinase	FASTK mitochondrial RNA binding family	10922	ENSG00000164896	0.0778701	0.876364	-0.101559	0.915486	-0.0455652	0.967154
GATCTTATCAGAGCGATTCTTGAC	TRCN0000487984	FASTK	Fas activated serine/threonine kinase	FASTK mitochondrial RNA binding family	10922	ENSG00000164896	0.238133	0.543949	0.227835	0.795963	0.0232781	0.992648
GTCACCAGGCGATCCCGACCAAGC	TRCN0000480826	SLC41A3	solute carrier family 41 member 3	Solute carriers	54946	ENSG00000114544	0.0315657	0.929623	0.0964932	0.88246	0.0615951	0.91395
CTCAGCCCGCGGGGGATATCACAT	TRCN0000465651	SLC41A3	solute carrier family 41 member 3	Solute carriers	54946	ENSG00000114544	-0.0484466	0.915283	-0.276113	0.700481	-0.0137075	0.99017
CGACGTAGGTTATGCAGATCAGCA	TRCN0000466372	SLC41A3	solute carrier family 41 member 3	Solute carriers	54946	ENSG00000114544	-0.133773	0.740534	-0.134088	0.890589	-0.0040997	0.995939
GCTCACAACTCTGGCGTCCAACTT	TRCN0000465654	FERD3L	Fer3 like bHLH transcription factor	Basic helix-loop-helix proteins	222894	ENSG00000146618	-0.414923	0.262842	-0.128455	0.950337	-0.144736	0.921279
GGACAAACTCAGCTAAATGCAGTC	TRCN0000465656	PRRT2	proline rich transmembrane protein 2	interferon induced transmembrane protein domain containing	112476	ENSG00000167371	-0.460635	0.0667347	0.0191951	0.98187	-0.272723	0.564933
CCCGTCGAAGGTAGTCGATAATAT	TRCN0000468710	PRRT2	proline rich transmembrane protein 2	interferon induced transmembrane protein domain containing	112476	ENSG00000167371	-0.208215	0.569676	-0.035458	0.973437	-0.186953	0.773114
TTCGACCCTCTTCGTTCTTGTCGG	TRCN0000489287	FGGY	FGGY carbohydrate kinase domain containing		55277	ENSG00000172456	0.0463498	0.967724	0.0922831	0.972581	0.170233	0.935993
TCACGGTGTCGTACACAATTGAAG	TRCN0000465658	FGGY	FGGY carbohydrate kinase domain containing		55277	ENSG00000172456	-0.0733322	0.904036	-0.0601515	0.960091	0.179997	0.806787
CGCCCCGGGGGCGATGGCGACCGA	TRCN0000467964	FGGY	FGGY carbohydrate kinase domain containing		55277	ENSG00000172456	0.0784837	0.950788	0.312753	0.917654	0.0981896	0.972192
CGTTGCCTAACAATATCCCTCCAC	TRCN0000471237	FGGY	FGGY carbohydrate kinase domain containing		55277	ENSG00000172456	-0.186945	0.581269	-0.28147	0.698786	-0.236178	0.64148
GTACCCTAGGTCAATGATCGGCAG	TRCN0000465659	SH3RF2	SH3 domain containing ring finger 2	Ring finger proteins|Protein phosphatase 1 regulatory subunits	153769	ENSG00000156463	0.0255549	0.945279	0.168341	0.800394	0.0396217	0.940332
GAAATCCCATATGTACCTTCATTC	TRCN0000466529	SURF1	SURF1, cytochrome c oxidase assembly factor	Mitochondrial respiratory chain complex assembly factors	6834	ENSG00000148290	0.0887698	0.799384	-0.0662405	0.951179	0.16827	0.72594
CTCAGGGGGATAACCCCGGCGACT	TRCN0000465660	SURF1	SURF1, cytochrome c oxidase assembly factor	Mitochondrial respiratory chain complex assembly factors	6834	ENSG00000148290	-0.0354069	0.928839	-0.173909	0.770647	-0.0930539	0.877398
GAGTCTTCTGTGTTCATACAGTCC	TRCN0000478064	NSMF	NMDA receptor synaptonuclear signaling and neuronal migration factor		26012	ENSG00000165802	-0.0224895	0.978822	-0.0292033	0.986281	0.16307	0.889464
CGCGGCTGACCCGATGTCTGCTGA	TRCN0000465661	NSMF	NMDA receptor synaptonuclear signaling and neuronal migration factor		26012	ENSG00000165802	-0.278237	0.248845	-0.266909	0.630402	-0.331273	0.171606
GCTGTTGGAATTCATGAGATCTTT	TRCN0000465662	CNBD2	cyclic nucleotide binding domain containing 2		140894	ENSG00000149646	0.0282115	0.942797	0.0646317	0.914462	0.16931	0.612426
AACTAGAGAATGGGATCGGTCGAA	TRCN0000481377	MIA2	MIA SH3 domain ER export factor 2	CTAGE family|MIA family	4253	ENSG00000150526	0.205978	0.830348	0.102233	0.972789	-0.023002	0.993103
CTTGCATGAATTTATTTTATTCTT	TRCN0000470328	MIA2	MIA SH3 domain ER export factor 2	CTAGE family|MIA family	4253	ENSG00000150526	0.33059	0.605929	0.215245	0.933514	-0.0932136	0.963895
TATCAAGGGATTTCACCCCGGACT	TRCN0000465663	MIA2	MIA SH3 domain ER export factor 2	CTAGE family|MIA family	4253	ENSG00000150526	0.105124	0.791454	-0.183575	0.820676	-0.0906714	0.913515
ATAGTTAGCGCAGAAAAGATACGG	TRCN0000475416	MIA2	MIA SH3 domain ER export factor 2	CTAGE family|MIA family	4253	ENSG00000150526	-0.0385711	0.964112	0.074408	0.973216	0.217577	0.860702
CGTAACAATTTGATCTACACTAGA	TRCN0000465664	KRTAP13-3	keratin associated protein 13-3	Keratin associated proteins	337960	ENSG00000240432	-0.0878229	0.849224	-0.319246	0.62823	-0.0699253	0.934778
AAACGACCTCCGCTAAAGCCTCCC	TRCN0000465665	BTBD10	BTB domain containing 10	BTB domain containing	84280	ENSG00000148925	0.146137	0.764572	0.171579	0.937543	0.134707	0.925627
TAGCACATGCAACGTATCATCTAT	TRCN0000465666	CA11	carbonic anhydrase 11	Carbonic anhydrases	770	ENSG00000063180	-0.242684	0.535911	-0.241501	0.766818	-0.0822232	0.928538
GGTGTCTAATCGGGGCTCTAGGGC	TRCN0000465667	RTL8A	retrotransposon Gag like 8A	Retrotransposon Gag like	26071	ENSG00000203950	-0.154387	0.562111	-0.101216	0.894287	-0.0105383	0.991273
TAATGTTGACCACCACCGTGTAGT	TRCN0000465668	AGBL4	ATP/GTP binding protein like 4	M14 carboxypeptidases	84871	ENSG00000186094	-0.0603322	0.893688	0.0614959	0.92831	-0.108834	0.865765
CCATAGACATCCCTATGACCTCGA	TRCN0000465671	GSTT1	glutathione S-transferase theta 1	Soluble glutathione S-transferases	2952	ENSG00000277656	0.00135606	0.99743	-0.0196371	0.987896	-0.130076	0.844729
CGGCTGATCTACTGCGTCGCGACC	TRCN0000465672	TSGA10IP	testis specific 10 interacting protein		254187	ENSG00000175513	-0.384127	0.216309	-0.470439	0.124476	-0.448969	0.15298
TTTAGACACCTAAGCCATTCGCGG	TRCN0000480217	TSGA10IP	testis specific 10 interacting protein		254187	ENSG00000175513	-0.275668	0.455452	-0.207179	0.80367	-0.167069	0.796136
AAAGGGTATCAGTCACCATAACAA	TRCN0000465673	RSRC1	arginine and serine rich coiled-coil 1		51319	ENSG00000174891	0.0825218	0.864319	0.131575	0.901826	0.108373	0.895256
CCCCACCGGGTTAAATCTTCCTCC	TRCN0000473767	RSRC1	arginine and serine rich coiled-coil 1		51319	ENSG00000174891	-0.114795	0.75773	-0.00100882	0.99491	-0.0342994	0.967436
TATCTAACCTTTAGAGGGCCCGGT	TRCN0000465674	MIA3	MIA SH3 domain ER export factor 3	CTAGE family|MIA family	375056	ENSG00000154305	0.0793469	0.870222	0.165647	0.815669	0.0675431	0.933754
TCCGGCACTTCATGATTGAGATCG	TRCN0000468551	SIAH1	siah E3 ubiquitin protein ligase 1	Ring finger proteins	6477	ENSG00000196470	-0.116645	0.601637	-0.082836	0.911864	-0.126848	0.733746
CGAGCGAGTAACCTACACAGGACT	TRCN0000465675	SIAH1	siah E3 ubiquitin protein ligase 1	Ring finger proteins	6477	ENSG00000196470	-0.0696036	0.830234	-0.0747748	0.915961	-0.177775	0.650094
TGCATATTGTGGGCGCGACGGAGA	TRCN0000465676	GIT2	GIT ArfGAP 2	ArfGAPs|Ankyrin repeat domain containing	9815	ENSG00000139436	-0.311527	0.365714	-0.0520083	0.96908	-0.196424	0.78771
AGGGAGGGCTGTGTATCCCAGTCC	TRCN0000465677	IL1RN	interleukin 1 receptor antagonist	Endogenous ligands|Interleukins|Interleukin receptors	3557	ENSG00000136689	-0.0301495	0.944289	-0.136842	0.849958	-0.0513764	0.946613
AGGTGACCTATTCTTTCAGAAATC	TRCN0000465680	MAP2K5	mitogen-activated protein kinase kinase 5	Mitogen-activated protein kinase kinases	5607	ENSG00000137764	0.171592	0.805816	-0.276481	0.890428	0.206349	0.853644
TGTTTACCTTTCTAAGTGAGACGG	TRCN0000488580	MAP2K5	mitogen-activated protein kinase kinase 5	Mitogen-activated protein kinase kinases	5607	ENSG00000137764	-0.074512	0.930975	0.20918	0.93041	0.0459998	0.986534
TATGCAACCAGCACGTGCATTTCG	TRCN0000469588	HSD17B11	hydroxysteroid 17-beta dehydrogenase 11	Short chain dehydrogenase/reductase superfamily	51170	ENSG00000198189	-0.0776824	0.859141	-0.0773092	0.931297	0.206279	0.628677
TTAAGCGTGATTTTCCCGCTTAAG	TRCN0000465681	HSD17B11	hydroxysteroid 17-beta dehydrogenase 11	Short chain dehydrogenase/reductase superfamily	51170	ENSG00000198189	0.0621343	0.85246	0.165418	0.766513	0.110308	0.828237
GACCAGACTCGTTGGTCGAAGCCG	TRCN0000475395	HSD17B11	hydroxysteroid 17-beta dehydrogenase 11	Short chain dehydrogenase/reductase superfamily	51170	ENSG00000198189	0.0339644	0.934361	-6.22344e-05	0.992602	-0.0174107	0.983234
CTTTAAGCTTCCTATTATTTTTTT	TRCN0000465682	ETFDH	electron transfer flavoprotein dehydrogenase		2110	ENSG00000171503	-0.0625379	0.950875	-0.0265911	0.991746	0.107879	0.954278
AGAGTGTCAGTTAACGTCCTGACA	TRCN0000491842	COQ8B	coenzyme Q8B		79934	ENSG00000123815	-0.0741104	0.918818	0.0126014	0.995968	0.00634182	0.996635
AATGAAACCGCCTAAAGTGCATTC	TRCN0000466814	COQ8B	coenzyme Q8B		79934	ENSG00000123815	-0.119987	0.894033	-0.0583768	0.981247	-0.0713735	0.975194
ACTTACTGTGCAGACAAGGGAAAC	TRCN0000465683	COQ8B	coenzyme Q8B		79934	ENSG00000123815	0.0844121	0.937937	-0.0435776	0.986281	-0.393836	0.75553
CCCAGTTAATACGCCCTTATGCGG	TRCN0000467699	COQ8B	coenzyme Q8B		79934	ENSG00000123815	-0.102909	0.844202	-0.0448733	0.973918	-0.207758	0.837178
GATCCCTAATATCTGAAACCCCAG	TRCN0000491584	COQ8B	coenzyme Q8B		79934	ENSG00000123815	0.0315653	0.97523	0.025528	0.992912	-0.118058	0.94496
CTGAATCTTTTTCCTGAGTGGAGG	TRCN0000465684	TRMT6	tRNA methyltransferase 6	tRNA methyltransferases	51605	ENSG00000089195	-0.057313	NA	-0.0361568	NA	0.0885771	0.980778
TTTTCCTTCCTAATCTATAGCCTT	TRCN0000465685	GAPDH	glyceraldehyde-3-phosphate dehydrogenase		2597	ENSG00000111640	0.197451	0.780847	0.232691	0.923209	0.379251	0.670365
ACCTGGGTGCATCCAGAAGGTTGA	TRCN0000474158	GAPDH	glyceraldehyde-3-phosphate dehydrogenase		2597	ENSG00000111640	0.0903625	0.8273	-0.017375	0.988738	-0.0784518	0.929109
AGCAGTTTCAACGATAGCCTATCT	TRCN0000465686	LINC01657	long intergenic non-protein coding RNA 1657		101928751	ENSG00000224718	0.00738085	0.982481	-0.127194	0.783369	-0.0155818	0.983304
ATGGATTGAAGTGGTTCCCTTGCA	TRCN0000465687	TMEM47	transmembrane protein 47		83604	ENSG00000147027	0.0131787	0.979619	0.137986	0.877476	0.15181	0.812762
TGACCGAAAAAAAATTTTTCGTTT	TRCN0000465689	MAP2K2	mitogen-activated protein kinase kinase 2	Mitogen-activated protein kinase kinases	5605	ENSG00000126934	-0.19698	0.571853	-0.127543	0.892432	-0.0381407	0.97069
AGCCCTCCCGCTAGCATAACCTAG	TRCN0000487985	MAP2K2	mitogen-activated protein kinase kinase 2	Mitogen-activated protein kinase kinases	5605	ENSG00000126934	0.0171108	0.987799	0.307976	0.893838	-0.160946	0.939654
AACCGTCGGGCCCACCATGAAATT	TRCN0000465915	MAP2K2	mitogen-activated protein kinase kinase 2	Mitogen-activated protein kinase kinases	5605	ENSG00000126934	0.208454	0.770637	-0.163135	0.949875	0.0906436	0.965128
AAGCGGTCACCAGAATGAGGGTTC	TRCN0000477744	MAP2K2	mitogen-activated protein kinase kinase 2	Mitogen-activated protein kinase kinases	5605	ENSG00000126934	0.219489	0.598893	0.120149	0.957992	0.0997403	0.948138
GCGCTTTTCCTGCACCTTGACTTA	TRCN0000487698	MAP2K2	mitogen-activated protein kinase kinase 2	Mitogen-activated protein kinase kinases	5605	ENSG00000126934	0.0745448	0.928972	-0.0712841	0.971118	-0.111117	0.94496
TCGTGTACACTAATTCAACAAATA	TRCN0000465690	SNX14	sorting nexin 14	Sorting nexins	57231	ENSG00000135317	0.165158	0.825735	0.169721	0.946121	0.0507556	0.985841
CCGAGACGTTTCCTGGAGCGCTGC	TRCN0000468783	SNX14	sorting nexin 14	Sorting nexins	57231	ENSG00000135317	-0.115043	0.881832	-0.0216007	0.992912	0.0543535	0.979124
CGTATACTATCCAATCCCGAATTC	TRCN0000465692	KIF26A	kinesin family member 26A	Kinesins	26153	ENSG00000066735	-0.131092	0.653555	-0.0932813	0.893709	-0.137545	0.742404
ATCCAGTAGGCGATACGATATAGC	TRCN0000465693	C2orf15	chromosome 2 open reading frame 15		150590	ENSG00000273045	0.09917	0.804197	-0.0435454	0.964863	0.0628312	0.937993
GATTATATTTATTCCCCATTTCTA	TRCN0000488148	GCLC	glutamate-cysteine ligase catalytic subunit		2729	ENSG00000001084	-0.0303728	0.969899	0.257957	0.802476	0.132985	0.887503
TGCGCTAACATTACAGCTCCAATG	TRCN0000492200	GCLC	glutamate-cysteine ligase catalytic subunit		2729	ENSG00000001084	-0.359545	0.222138	-0.319368	0.632774	-0.197169	0.737474
GAAGGTCGTGCACGTACCAATACC	TRCN0000478577	GCLC	glutamate-cysteine ligase catalytic subunit		2729	ENSG00000001084	-0.204019	0.760494	-0.153146	0.948654	-0.0525206	0.982001
CGGCCTGCCCCGTCGATACGATCA	TRCN0000465694	GCLC	glutamate-cysteine ligase catalytic subunit		2729	ENSG00000001084	-0.013463	0.986191	-0.0586489	0.973317	0.0843353	0.962271
CCCAACGGCCCCACGATTGATAAG	TRCN0000481176	GRAMD1B	GRAM domain containing 1B	GRAM domain containing	57476	ENSG00000023171	-0.149838	0.825735	-0.126081	0.957454	-0.14188	0.922677
GACTAAAGGTCGTCCTACCGATTA	TRCN0000465695	GRAMD1B	GRAM domain containing 1B	GRAM domain containing	57476	ENSG00000023171	0.0468119	NA	NA	NA	NA	NA
TGTGCTCACGCCAAATTCGGGCAG	TRCN0000465696	NDN	necdin, MAGE family member	MAGE family	4692	ENSG00000182636	-0.00472415	NA	-0.0182582	NA	-0.0665208	NA
CCCGGGGAGAGCGAACGCCGAATC	TRCN0000465697	ENKUR	enkurin, TRPC channel interacting protein	Cilia and flagella associated	219670	ENSG00000151023	-0.0727856	0.891583	0.00512486	0.993893	-0.0915145	0.917577
AATCCAATCATATAGCAACACCGG	TRCN0000465698	ZNF329	zinc finger protein 329	Zinc fingers C2H2-type	79673	ENSG00000181894	0.381862	0.533621	0.324629	0.893838	0.145504	0.94496
CAGTTAAAACCCGCCCAATTCCAA	TRCN0000465699	PRR16	proline rich 16		51334	ENSG00000184838	-0.0166977	0.966979	-0.0430412	0.95554	0.0139921	0.982024
GCCTTCAATGGAATTGCATCAATC	TRCN0000465700	ZKSCAN4	zinc finger with KRAB and SCAN domains 4	Zinc fingers C2H2-type|SCAN domain containing	387032	ENSG00000187626	-0.00726607	0.989188	0.0753161	0.941075	-0.0949444	0.914991
TCAATTTGCCATGGTTGCTACTTT	TRCN0000465701	HARS	histidyl-tRNA synthetase	Aminoacyl tRNA synthetases, Class II	3035	ENSG00000170445	0.0373879	0.950687	0.220297	0.773673	0.0769456	0.944453
ACTGAATACAGCAGCCGCTCATCC	TRCN0000465702	RPL3	ribosomal protein L3	L ribosomal proteins	6122	ENSG00000100316	0.0188021	0.97601	0.180271	0.839046	0.372421	0.351445
GAAAAATTGCTTCGTTGTTCCTCC	TRCN0000466746	RPL3	ribosomal protein L3	L ribosomal proteins	6122	ENSG00000100316	0.0606958	0.88986	0.193808	0.75182	0.163695	0.759902
TCCCTTGTCTTCCTATTTGTGTAC	TRCN0000468290	RPL3	ribosomal protein L3	L ribosomal proteins	6122	ENSG00000100316	-0.0348331	0.9445	0.121433	0.855337	-0.066173	0.929113
ATTCGCGCAGATACTGCTCCGGCA	TRCN0000468990	RPL3	ribosomal protein L3	L ribosomal proteins	6122	ENSG00000100316	0.1421	0.76717	0.192851	0.837764	0.177071	0.789363
CTATTCTACGGTACATACGTTTGC	TRCN0000474893	EEF1G	eukaryotic translation elongation factor 1 gamma		1937	ENSG00000254772	0.00468237	0.990987	0.072014	0.938114	0.241536	0.584374
CAAGCAGTTTCGACCTTTCATATT	TRCN0000473878	EEF1G	eukaryotic translation elongation factor 1 gamma		1937	ENSG00000254772	-0.0540613	0.87873	-0.0695333	0.936027	-0.0204647	0.981932
AAGCTGGGATTACTTCTGTACGGC	TRCN0000465703	EEF1G	eukaryotic translation elongation factor 1 gamma		1937	ENSG00000254772	0.304602	0.170813	0.131153	0.880854	0.196654	0.652216
ACCAGTCCTGACTGGGCCCGTTTC	TRCN0000470743	EEF1G	eukaryotic translation elongation factor 1 gamma		1937	ENSG00000254772	0.107511	0.772731	0.134916	0.864801	0.0909531	0.886893
AGTTGCTCGGTCCCTCTCATGAGT	TRCN0000465704	ERICH6	glutamate rich 6		131831	ENSG00000163645	0.0642045	0.860902	-0.0230879	0.98046	0.187031	0.633666
CTCAGGCAAGTTTACGCTTGATTT	TRCN0000465705	LHFPL5	LHFPL tetraspan subfamily member 5	Deafness associated genes|LHFPL tetraspan proteins	222662	ENSG00000197753	-0.0500989	0.868742	-0.0137179	0.987499	-0.0306771	0.961607
TCCGATATATCCAATCTGGCCCCT	TRCN0000465706	CALML3	calmodulin like 3	EF-hand domain containing	810	ENSG00000178363	-0.077528	0.824491	0.125463	0.810598	-0.0833263	0.872751
ACATTACCATATTGCCCGAATTGG	TRCN0000465708	TBRG1	transforming growth factor beta regulator 1		84897	ENSG00000154144	0.0775486	0.735712	0.0806788	0.888669	0.0523897	0.895668
TTTCGGTCGAACATAGACGACCGG	TRCN0000465710	SMAD2	SMAD family member 2	SMAD family	4087	ENSG00000175387	0.263187	0.482029	0.194354	0.810343	0.175694	0.779403
AACAGCGACCCTGCGCGTTGAAAC	TRCN0000465711	RRAGA	Ras related GTP binding A		10670	ENSG00000155876	0.0967086	0.80076	0.0754799	0.927185	0.0125295	0.98772
TCAATCCGACATCGTTCGTCCGCT	TRCN0000465712	GNGT1	G protein subunit gamma transducin 1	G protein subunits gamma	2792	ENSG00000127928	-0.151358	0.64979	-0.224046	0.707221	-0.0773565	0.910669
TATAGTTTGTCCTTGCTAAACACC	TRCN0000465713	INVS	inversin	Ankyrin repeat domain containing	27130	ENSG00000119509	0.0767891	0.837276	0.0627298	0.933012	-0.0216738	0.98052
TCCACCTTGAATTAAACTATCGAT	TRCN0000465714	SMIM19	small integral membrane protein 19		114926	ENSG00000176209	0.111236	0.768844	0.062635	0.939554	0.100784	0.886729
CTCTCTCTTGTATTCCTTTCAAGT	TRCN0000478384	ABHD17A	abhydrolase domain containing 17A	Abhydrolase domain containing	81926	ENSG00000129968	-0.011898	0.98043	-0.0045932	0.995112	0.0299017	0.970619
CAGCATGCTCTGCGTCTCATCCAG	TRCN0000465715	ABHD17A	abhydrolase domain containing 17A	Abhydrolase domain containing	81926	ENSG00000129968	-0.175874	0.633722	-0.0427227	0.963039	-0.421291	0.129216
CCCGCTAGCACTCTAGGATCTGGA	TRCN0000465716	TP53BP1	tumor protein p53 binding protein 1	Tudor domain containing	7158	ENSG00000067369	-0.063738	0.834847	-0.128056	0.806419	-0.0450581	0.932128
TCGTTCTATACCCGCCGCTGGTTG	TRCN0000465718	HAT1	histone acetyltransferase 1	Lysine acetyltransferases	8520	ENSG00000128708	0.224904	0.83825	-0.0730558	NA	0.124096	0.962271
GTTAGCTAACGAGCGGGCCAGACG	TRCN0000472534	HAT1	histone acetyltransferase 1	Lysine acetyltransferases	8520	ENSG00000128708	-0.0591036	0.952607	0.00849976	0.996963	-0.106237	0.955961
ACTGCGGCTGATCAGATCCCCAGG	TRCN0000465719	MEIS2	Meis homeobox 2	TALE class homeoboxes and pseudogenes	4212	ENSG00000134138	0.00241655	0.994948	-0.0778405	0.934004	0.128197	0.855319
ACACACCCAATCGGACACGTGCAG	TRCN0000470691	MEIS2	Meis homeobox 2	TALE class homeoboxes and pseudogenes	4212	ENSG00000134138	0.02465	0.954138	0.203066	0.699992	-0.0301194	0.970245
TGTTGTTCGTTATACTAAATGTCT	TRCN0000465721	RPL32	ribosomal protein L32	L ribosomal proteins	6161	ENSG00000144713	0.0483244	0.920176	0.155782	0.816646	0.160104	0.757458
GGGTTTTAACGACCCCGTAGCAAT	TRCN0000465722	ANKRD50	ankyrin repeat domain 50	Ankyrin repeat domain containing	57182	ENSG00000151458	0.15114	0.769417	-0.228001	0.797016	-0.1972	0.723438
TGACCGAGTATAGGCAGTCTTGGC	TRCN0000465724	ACAA2	acetyl-CoA acyltransferase 2		10449	ENSG00000167315	0.0268708	0.966753	0.0456457	0.96975	-0.0999685	0.913159
ATCCGGATAACGGGAAGACTTAAT	TRCN0000465725	ZMYM1	zinc finger MYM-type containing 1	Zinc fingers MYM-type	79830	ENSG00000197056	0.07688	0.928972	0.224402	0.923209	0.0501241	0.981443
TTTTCTCCCGAAAAATCGGCTAGC	TRCN0000465727	CRYGB	crystallin gamma B	Beta-gamma crystallins	1419	ENSG00000182187	0.36183	0.105743	0.375383	0.223022	0.395306	0.146703
CACTTTCGTGCTTTGAAGCACGGT	TRCN0000465728	MED20	mediator complex subunit 20	Mediator complex	9477	ENSG00000124641	-0.138131	0.899405	0.00753677	0.997005	-0.381867	0.793739
CTCTTGAAGAGCGCGATTAGTAGC	TRCN0000489684	MED20	mediator complex subunit 20	Mediator complex	9477	ENSG00000124641	0.0106731	0.978455	0.0135084	0.980991	-0.00631271	0.994006
GCAGCAGTCATGGTGTAGACGGTA	TRCN0000492336	MED20	mediator complex subunit 20	Mediator complex	9477	ENSG00000124641	0.0202954	0.970767	-0.0842183	0.935258	-0.0779998	0.929141
AAACCAAGTACTCCTGGCATAGAG	TRCN0000465729	CBX7	chromobox 7	Chromobox family	23492	ENSG00000100307	0.190612	0.748958	0.27834	0.877728	0.168289	0.895197
TCAGTGCTGGGTAACATGTGAAAG	TRCN0000465731	C3orf38	chromosome 3 open reading frame 38		285237	ENSG00000179021	0.102427	0.908864	-0.164953	0.950768	0.194329	0.89336
TTTGGTCAGGCTCAAGAACTTTTA	TRCN0000479633	HMG20B	high mobility group 20B	Non-canonical high mobility group	10362	ENSG00000064961	-0.127108	0.850932	-0.228635	0.894807	-0.0188464	0.992648
TCTTGTGTCTTTCCGTAGTGTCGA	TRCN0000465732	HMG20B	high mobility group 20B	Non-canonical high mobility group	10362	ENSG00000064961	-0.147357	0.67786	-0.057916	0.958367	-0.157877	0.80131
GTCATCTTCTTCCTGACTGTTAAT	TRCN0000465733	YIPF1	Yip1 domain family member 1	Yip1 domain containing	54432	ENSG00000058799	0.312581	0.233099	0.307653	0.337383	0.293055	0.417658
CTCCGACATGTTCATGGGGTGAAG	TRCN0000467922	YIPF1	Yip1 domain family member 1	Yip1 domain containing	54432	ENSG00000058799	-0.0854823	0.770864	-0.0614657	0.936401	-0.0202764	0.978798
GCACCTTCAATCCTCGCTCCCGTT	TRCN0000465734	SLC27A4	solute carrier family 27 member 4	Acyl-CoA synthetase family|Solute carriers	10999	ENSG00000167114	0.174452	0.680071	0.101007	0.96295	0.196766	0.803078
TTGCACTTGCCTACGTGGGCGCCT	TRCN0000489615	ACVR1B	activin A receptor type 1B	Type 1 receptor serine/threonine kinases	91	ENSG00000135503	-0.541136	0.394911	-0.191878	0.956581	-0.0423362	0.991461
CCGTTCGCCTTGATTCTTTCGACA	TRCN0000474947	ACVR1B	activin A receptor type 1B	Type 1 receptor serine/threonine kinases	91	ENSG00000135503	-0.0594426	0.957675	0.0850505	0.975088	0.216858	0.902199
GGCATCCGACAGGTTCTCTTAACC	TRCN0000465737	ACVR1B	activin A receptor type 1B	Type 1 receptor serine/threonine kinases	91	ENSG00000135503	-0.0880047	0.946819	-0.273549	0.928666	-0.0282183	0.992648
CCAAAATCATTATGGCTTATTATG	TRCN0000465738	C22orf46	chromosome 22 open reading frame 46		79640	ENSG00000184208	-0.18409	0.368513	-0.15994	0.701489	-0.204802	0.54165
TTTGCAAGGTCCGTGACCGAGTTC	TRCN0000465739	SH3BGRL	SH3 domain binding glutamate rich protein like		6451	ENSG00000131171	0.0334815	0.949811	0.135119	0.872352	0.207328	0.675872
AGTTCAGTACTGAACTCTGTCGGA	TRCN0000465741	MRPL57	mitochondrial ribosomal protein L57	Mitochondrial ribosomal proteins	78988	ENSG00000173141	0.117416	0.81577	0.0663344	0.972956	0.265095	0.655781
GAATTTTTCCCTAATATCTCTGGG	TRCN0000467241	ORAI1	ORAI calcium release-activated calcium modulator 1	ORAI calcium release-activated calcium modulators	84876	ENSG00000276045	0.268041	0.315031	0.210756	0.705055	0.249655	0.517573
CAAAGGCCTAAGAGGACAGAGAGT	TRCN0000465742	ORAI1	ORAI calcium release-activated calcium modulator 1	ORAI calcium release-activated calcium modulators	84876	ENSG00000276045	-0.102659	0.762247	0.00218547	0.9929	-0.126493	0.839069
TGATCTGGAGCCTATCTTGACCAT	TRCN0000465743	SPHKAP	SPHK1 interactor, AKAP domain containing	A-kinase anchoring proteins	80309	ENSG00000153820	-0.211711	0.822584	0.0567944	0.988393	-0.273368	0.901672
CAGGGTCGTTTCACTCCGCTAAAC	TRCN0000465744	PNLIPRP3	pancreatic lipase related protein 3	Lipases	119548	ENSG00000203837	0.0830655	0.864963	-0.036317	0.978835	0.00568789	0.994322
ATACGGAGTTAAACCCCTGAAGCC	TRCN0000474891	RPL13	ribosomal protein L13		6137	ENSG00000167526	-0.0426844	0.939488	0.0227186	0.978737	0.0127605	0.987721
CAGATTAGTCCTAGTAGTAAAGTA	TRCN0000480155	RPL13	ribosomal protein L13		6137	ENSG00000167526	-0.0343153	0.948274	-0.0113373	0.99382	-0.189413	0.75226
ATAAGATTGTCACCCAAGGAATCA	TRCN0000465745	RPL13	ribosomal protein L13		6137	ENSG00000167526	0.0344949	0.938796	0.0266888	0.972412	-0.0141336	0.989774
GTATTTCCGCGAATCGGGTCGGAG	TRCN0000465747	HIST1H4C	histone cluster 1 H4 family member c	Histones	8364	ENSG00000197061	0.0086066	0.994	-0.294863	0.899351	-0.0539153	0.982971
CGGTTCTCTACCTAGACCACAACC	TRCN0000465748	OSER1	oxidative stress responsive serine rich 1		51526	ENSG00000132823	-0.250749	0.317608	-0.0838065	0.940137	-0.238551	0.53564
TCGGTGCGACCACCAACACATAGC	TRCN0000465749	CWF19L1	CWF19 like cell cycle control factor 1		55280	ENSG00000095485	-0.134605	0.857966	-0.248505	0.893838	-0.063872	0.974477
CAATCGATTGGTATATCGAAATTC	TRCN0000465750	USH1C	USH1 protein network component harmonin	Deafness associated genes|PDZ domain containing	10083	ENSG00000006611	0.0407736	0.965952	0.048582	0.984319	-0.294533	0.765888
ACTCTCAGAAAAGATCATCAACTC	TRCN0000465752	NDUFB1	NADH:ubiquinone oxidoreductase subunit B1	NADH:ubiquinone oxidoreductase supernumerary subunits	4707	ENSG00000183648	0.0853526	0.781178	0.0837104	0.907119	0.0767768	0.905485
CTGCTGCGTTCCGGAACTCCGTTT	TRCN0000465753	REEP1	receptor accessory protein 1	Receptor accessory proteins	65055	ENSG00000068615	0.00750439	0.982467	0.179238	0.684403	0.0507456	0.922991
ATAGTACTCACGTATTTCCTGATG	TRCN0000465754	MFAP4	microfibril associated protein 4	Fibrinogen C domain containing	4239	ENSG00000166482	0.067701	0.861058	0.214345	0.705055	-0.00248632	0.997476
CGACTCTACAACCGTGCCGCCGCT	TRCN0000465755	HIST1H1A	histone cluster 1 H1 family member a	Histones	3024	ENSG00000124610	-0.212959	0.308683	-0.214518	0.552091	-0.0742707	0.878158
ATTAAAGTTTTGTTACAACGTATT	TRCN0000468456	RDH11	retinol dehydrogenase 11	Short chain dehydrogenase/reductase superfamily	51109	ENSG00000072042	0.428806	0.303958	0.154298	0.949781	0.278545	0.775437
ACAGGATAAGCAAGTGGACTGTGA	TRCN0000472922	RDH11	retinol dehydrogenase 11	Short chain dehydrogenase/reductase superfamily	51109	ENSG00000072042	-0.0176835	0.974357	-0.0851822	0.931865	-0.126309	0.847329
TCTCTTCCTTGCCTCAATGCAACA	TRCN0000465756	RDH11	retinol dehydrogenase 11	Short chain dehydrogenase/reductase superfamily	51109	ENSG00000072042	0.0741868	0.936043	0.247995	0.916171	0.0357495	0.989429
TTCGTGCACGGCGTCCGCCCGGGT	TRCN0000465757	C11orf45	chromosome 11 open reading frame 45		219833	ENSG00000174370	0.00331954	0.989586	0.117236	0.775363	-0.0157639	0.98077
CACGTAATGAGGTCTGCATAATCT	TRCN0000465758	NTF3	neurotrophin 3	Neurotrophins	4908	ENSG00000185652	-0.140756	0.474425	-0.0243822	0.967439	-0.138231	0.674111
CAACAACGACAACAATCGGATGCT	TRCN0000472807	NTF3	neurotrophin 3	Neurotrophins	4908	ENSG00000185652	-0.0244348	0.943497	-0.00247093	0.993404	0.00176354	0.996334
CGCCTGCGCACATCACTACTGGCC	TRCN0000465759	KCTD19	potassium channel tetramerization domain containing 19		146212	ENSG00000168676	-0.140348	0.735572	0.00641702	0.991922	-0.235107	0.65981
ATTAGCAGGAAGAAATATGTGGTT	TRCN0000466779	PAPSS1	3'-phosphoadenosine 5'-phosphosulfate synthase 1		9061	ENSG00000138801	-0.242401	0.724669	0.379939	0.799136	0.193342	0.892299
CAACTGTATAAGAGCGAGAACATC	TRCN0000487874	PAPSS1	3'-phosphoadenosine 5'-phosphosulfate synthase 1		9061	ENSG00000138801	-0.360763	0.388995	-0.205839	0.913303	-0.21061	0.840829
ATGTTAACCCTACTTTGCTGTCTT	TRCN0000469199	PAPSS1	3'-phosphoadenosine 5'-phosphosulfate synthase 1		9061	ENSG00000138801	0.303897	0.574017	-0.0433053	0.98443	0.370614	0.665999
CCATCGCCATTCATCGTGCCCCGC	TRCN0000465760	PAPSS1	3'-phosphoadenosine 5'-phosphosulfate synthase 1		9061	ENSG00000138801	-0.184124	0.754131	-0.0336429	0.984813	-0.251772	0.783585
GACTTCGACTGTCGATACGGATGT	TRCN0000491740	PAPSS1	3'-phosphoadenosine 5'-phosphosulfate synthase 1		9061	ENSG00000138801	0.0054135	0.991135	-0.0846114	0.945764	0.171296	0.780846
GGTATCCGCGATAGTTCGACGGTA	TRCN0000465761	GTF3C5	general transcription factor IIIC subunit 5	General transcription factors	9328	ENSG00000148308	-0.224833	0.807796	-0.05378	0.9882	-0.0941669	0.971583
GCACCCCCAGGAGACCTCCGTCGG	TRCN0000465762	RNASET2	ribonuclease T2		8635	ENSG00000026297	0.105082	0.772634	0.151915	0.806934	-0.0604863	0.936981
ATGACGTATACCCGCATGTTATTG	TRCN0000487898	PGC	progastricsin		5225	ENSG00000096088	0.153757	0.621031	0.166435	0.799064	0.130545	0.798807
AGGGTAACTTACCGACTCCGGGCT	TRCN0000465763	PGC	progastricsin		5225	ENSG00000096088	-0.100563	0.751617	-0.0196919	0.98226	-0.0292666	0.967154
AATGCTAGACATCCAAGGCAATTT	TRCN0000465764	PDE6H	phosphodiesterase 6H	Phosphodiesterases	5149	ENSG00000139053	0.265796	0.564718	0.0825012	0.927519	0.29409	0.597772
CTTATAACTCTGCTTACGCATACA	TRCN0000465765	C7orf25	chromosome 7 open reading frame 25		79020	ENSG00000136197	0.147388	0.682103	0.150028	0.85088	-0.00441085	0.997042
GAACCAGACCACCAAATATCCTTA	TRCN0000465766	SH3GLB1	SH3 domain containing GRB2 like, endophilin B1	Protein phosphatase 1 regulatory subunits|N-BAR domain containing	51100	ENSG00000097033	0.0611126	0.886867	0.0381931	0.962786	0.0012126	0.997773
CTTCAACTGATCTACACCTCTTAT	TRCN0000465767	KLHL14	kelch like family member 14	Kelch like|BTB domain containing	57565	ENSG00000197705	-0.132575	0.76203	-0.0482795	0.964265	0.104985	0.907335
TGTTCATCCGGCATGCGCCTTGCG	TRCN0000465768	ARHGAP27P1	Rho GTPase activating protein 27 pseudogene 1	Transcribed pseudogenes with published function	146880		-0.0185708	0.963777	-0.166935	0.753021	-0.104927	0.822288
GCGACGTTTCATCACCCAGACTTT	TRCN0000465769	ZNF468	zinc finger protein 468	Zinc fingers C2H2-type	90333	ENSG00000204604	0.0724359	0.836962	0.0762704	0.910102	0.00269048	0.997017
TTTATACCTCTATAAATCGGCGTG	TRCN0000473062	FXN	frataxin		2395	ENSG00000165060	0.281558	0.494132	0.226602	0.89599	0.209095	0.84453
ACATTGCAGAAACTAGATCAATGC	TRCN0000465770	FXN	frataxin		2395	ENSG00000165060	-0.130897	0.673901	-0.023598	0.981357	-0.151009	0.774884
TGCGTTTGTACAGCTTGTTCGCGT	TRCN0000465771	HDDC3	HD domain containing 3		374659	ENSG00000184508	-0.0973045	0.813735	-0.132515	0.857976	-0.23249	0.534756
TGGAACCGGTTAGCCGCTAGTATC	TRCN0000474130	MTAP	methylthioadenosine phosphorylase		4507	ENSG00000099810	-0.0577088	0.911958	-0.0768064	0.945819	-0.118175	0.896582
AATCGTTACTAGACGAATTGACAA	TRCN0000465772	MTAP	methylthioadenosine phosphorylase		4507	ENSG00000099810	0.17322	0.584073	0.256675	0.602269	0.233762	0.624883
CGAAGGAGGAAGAATAATTGACTA	TRCN0000465773	FOXS1	forkhead box S1	Forkhead boxes	2307	ENSG00000179772	-0.186833	0.381367	-0.24829	0.639311	-0.218933	0.426153
AACCTCCCATTTCCCTTTGTTCCG	TRCN0000478722	FOXS1	forkhead box S1	Forkhead boxes	2307	ENSG00000179772	0.147114	0.592154	0.0765955	0.921811	0.0747082	0.905347
CCGCGAGTGGATACGCACCAGCGC	TRCN0000465774	ST8SIA2	ST8 alpha-N-acetyl-neuraminide alpha-2,8-sialyltransferase 2	Sialyltransferases	8128	ENSG00000140557	-0.112307	0.571519	-0.126826	0.775311	-0.143946	0.661549
AAAATTCATCATACCTGATTTGCT	TRCN0000474440	ERLIN2	ER lipid raft associated 2		11160	ENSG00000147475	0.304625	0.222625	0.363863	0.246031	0.37087	0.206953
CTCCCTTCCAGCCCTTGCCGGGAG	TRCN0000465775	ERLIN2	ER lipid raft associated 2		11160	ENSG00000147475	-0.00383374	0.994646	0.117884	0.871245	0.152343	0.728512
CCTGTATGGTATTGTCGGAGACCT	TRCN0000489315	ART3	ADP-ribosyltransferase 3		419	ENSG00000156219	-0.0605926	0.825517	-0.0624762	0.92761	-0.13093	0.692926
GAGGAATCTTCGTGCCCGAAATAT	TRCN0000466162	ART3	ADP-ribosyltransferase 3		419	ENSG00000156219	0.199158	0.543472	0.235378	0.684912	0.187929	0.721705
CTAAGCTAAGTTTCGTGCCGGAGG	TRCN0000465777	ART3	ADP-ribosyltransferase 3		419	ENSG00000156219	0.0180212	NA	0.0728387	0.990346	0.504545	0.806208
TTTGTATTCAGGTCAAGATGTTAC	TRCN0000465778	C11orf53	chromosome 11 open reading frame 53		341032	ENSG00000150750	0.181548	0.523639	0.174126	0.764959	0.218762	0.534092
CGAAGGACACACTAGGCTCCCGCC	TRCN0000491514	GSG1	germ cell associated 1		83445	ENSG00000111305	-0.328508	0.0527148	-0.160088	0.810459	-0.191151	0.612077
TCGGGCCACGCGAGTTACTGATTG	TRCN0000465779	GSG1	germ cell associated 1		83445	ENSG00000111305	-0.266655	0.485644	-0.277937	0.654461	-0.217482	0.701797
ATGCAGTAGCTTGCCTTGGTCCCG	TRCN0000465780	RPS27	ribosomal protein S27	S ribosomal proteins	6232	ENSG00000177954	0.0790321	0.911707	-0.0398171	0.983399	-0.0521544	0.977098
CCCGCTCTGTGTCGGCCCGTCTAC	TRCN0000465781	SLC25A43	solute carrier family 25 member 43	Solute carriers	203427	ENSG00000077713	0.0162567	0.987295	-0.0357654	0.986681	-0.0919954	0.961927
CCCACAAGCCCAAGACATCACTGC	TRCN0000465782	EIF4EBP2	eukaryotic translation initiation factor 4E binding protein 2		1979	ENSG00000148730	-0.201713	0.304274	-0.159953	0.747646	-0.0332741	0.955358
GCATCGTGTCAGTGCTCCTGTGTA	TRCN0000465783	PIAS3	protein inhibitor of activated STAT 3	Zinc fingers MIZ-type	10401	ENSG00000131788	-0.0763872	0.834519	-0.142512	0.838209	-0.0868828	0.885612
GGATTTTCTGAACATAACCACACT	TRCN0000465784	PPP1R18	protein phosphatase 1 regulatory subunit 18	Protein phosphatase 1 regulatory subunits	170954	ENSG00000146112	-0.0716029	0.890864	-0.101696	0.931315	0.00460075	0.995338
CACCTTCTATTATGAAAACCCCTT	TRCN0000465785	GYPB	glycophorin B (MNS blood group)	Blood group antigens|CD molecules	2994	ENSG00000250361	-0.203796	0.808201	0.0324194	0.992513	-0.150661	0.94496
AAATGAACAAACGTTGGGACATCT	TRCN0000471964	GYPB	glycophorin B (MNS blood group)	Blood group antigens|CD molecules	2994	ENSG00000250361	-0.0168995	NA	-0.00549464	NA	0.0300769	NA
TGTCTCCGTTCACACTTGATGTGA	TRCN0000465786	CBX6	chromobox 6	Chromobox family	23466	ENSG00000183741	-0.373581	0.373351	-0.343701	0.780226	-0.308809	0.71656
TTCTAAAATCCCTGGAGTTCTTAT	TRCN0000471219	ZNF695	zinc finger protein 695	Zinc fingers C2H2-type	57116	ENSG00000197472	0.186593	0.629632	0.19545	0.844944	0.216867	0.695942
ATTTCATTACTAATATTCAGCCAT	TRCN0000465790	ZNF695	zinc finger protein 695	Zinc fingers C2H2-type	57116	ENSG00000197472	0.427231	0.0812796	0.425311	0.208664	0.438656	0.135294
TCTCCTGAACACTATGAGACCGTA	TRCN0000470953	ZNF695	zinc finger protein 695	Zinc fingers C2H2-type	57116	ENSG00000197472	-0.0426385	0.921298	0.0333462	0.967108	-0.000412668	0.996892
CCTTCTTTCCCTGAGATTACTTGT	TRCN0000465791	CCDC50	coiled-coil domain containing 50	Deafness associated genes	152137	ENSG00000152492	-0.155603	0.671482	-0.0376082	0.968832	0.14118	0.834743
GTGGAGCCAGTCCTACCCGTGGCC	TRCN0000465792	CYB5D2	cytochrome b5 domain containing 2	Membrane associated progesterone receptor family	124936	ENSG00000167740	0.058886	0.885871	0.019075	0.976704	0.111634	0.814374
GGGGTGTCAGGAAGGGTTCCCTTT	TRCN0000465793	ZPBP2	zona pellucida binding protein 2	Immunoglobulin like domain containing	124626	ENSG00000186075	0.119331	0.862055	0.15745	0.945007	0.0825028	0.959242
CGTCGTATTTGTTCATTACAGATA	TRCN0000465794	BCHE	butyrylcholinesterase		590	ENSG00000114200	-0.212481	0.443262	-0.190179	0.797208	-0.172153	0.770816
TGGAGCTAATCATGCTGTACACGC	TRCN0000465795	HACD1	3-hydroxyacyl-CoA dehydratase 1		9200	ENSG00000165996	-0.0944065	0.808498	-0.137236	0.859852	-0.226594	0.588316
ATACCGATCTTGGGCTGATGTGGC	TRCN0000465796	PSMC1	proteasome 26S subunit, ATPase 1	AAA ATPases|Proteasome	5700	ENSG00000100764	0.144619	0.686138	-0.187418	0.82433	0.0860629	0.911732
CTCAGACGGATCAGCGACCGCTAA	TRCN0000474360	PSMC1	proteasome 26S subunit, ATPase 1	AAA ATPases|Proteasome	5700	ENSG00000100764	-0.197641	0.608745	-0.121269	0.904116	0.0757735	0.935435
TCATAGGACCATTTCTTAGCCTGA	TRCN0000470475	PSMC1	proteasome 26S subunit, ATPase 1	AAA ATPases|Proteasome	5700	ENSG00000100764	0.0245898	0.966915	-0.0325186	0.977107	0.0263008	0.979487
ACAGCACGATATGCGTTTTTCCGG	TRCN0000478223	SLAMF1	signaling lymphocytic activation molecule family member 1	CD molecules|Immunoglobulin like domain containing|Ig-like cell adhesion molecule family	6504	ENSG00000117090	-0.0808847	0.778747	-0.0527818	0.928982	-0.110258	0.760702
ACGTAATAGCCACAGACAGCGTCC	TRCN0000480220	SLAMF1	signaling lymphocytic activation molecule family member 1	CD molecules|Immunoglobulin like domain containing|Ig-like cell adhesion molecule family	6504	ENSG00000117090	0.0381335	0.9395	0.0188055	0.978331	0.00316179	0.995779
TGTGGACAGGTCCTGGGGGCTTTC	TRCN0000465797	SLAMF1	signaling lymphocytic activation molecule family member 1	CD molecules|Immunoglobulin like domain containing|Ig-like cell adhesion molecule family	6504	ENSG00000117090	-0.110849	0.649707	-0.157704	0.655941	-0.205755	0.371099
CGAATTTTGTGATTCTGCTGAGTT	TRCN0000465798	UBL4B	ubiquitin like 4B		164153	ENSG00000186150	-0.172916	0.574091	-0.114807	0.889415	-0.0938861	0.891336
TACTGACAAACGCCTATGCAGTTC	TRCN0000475346	CYP19A1	cytochrome P450 family 19 subfamily A member 1	Cytochrome P450 family 19	1588	ENSG00000137869	-0.058092	0.878801	-0.0702685	0.919433	0.049118	0.941941
ACGAAGTGCCACACTGTCATTTGT	TRCN0000479090	CYP19A1	cytochrome P450 family 19 subfamily A member 1	Cytochrome P450 family 19	1588	ENSG00000137869	-0.102885	0.908222	0.0521924	0.984319	0.299299	0.796834
TAGGGGTGAACGCGAGCCTTCACG	TRCN0000465802	CYP19A1	cytochrome P450 family 19 subfamily A member 1	Cytochrome P450 family 19	1588	ENSG00000137869	0.00772334	NA	-0.00536628	NA	0.0587612	0.989287
ATGTTGCTTGATGAAGCCAGGCTC	TRCN0000465803	SPATA6	spermatogenesis associated 6		54558	ENSG00000132122	0.052599	NA	0.0154053	NA	-0.0108858	NA
GAAAACATACACAAGTGTTAAGTA	TRCN0000465805	ZFP36	ZFP36 ring finger protein	Zinc fingers CCCH-type	7538	ENSG00000128016	0.126851	0.671045	0.0199145	0.978849	-0.0854043	0.903446
CTAAACCTTTCCAAATGAGTCACC	TRCN0000491589	PNCK	pregnancy up-regulated nonubiquitous CaM kinase	Calmodulin dependent protein kinases	139728	ENSG00000130822	-0.129775	0.860301	-0.0229947	0.989721	0.0124949	0.993397
TCGAAGAAAGCGAATCCCTTGCAG	TRCN0000471652	PNCK	pregnancy up-regulated nonubiquitous CaM kinase	Calmodulin dependent protein kinases	139728	ENSG00000130822	-0.198886	0.644566	-0.186743	0.848113	-0.132671	0.871667
GACCAGCTCATGTGGATGCGCCAA	TRCN0000488639	PNCK	pregnancy up-regulated nonubiquitous CaM kinase	Calmodulin dependent protein kinases	139728	ENSG00000130822	0.260611	0.516578	0.187063	0.928015	0.100931	0.950942
GCCCCCCATACACAAGTGACTCCA	TRCN0000465807	PNCK	pregnancy up-regulated nonubiquitous CaM kinase	Calmodulin dependent protein kinases	139728	ENSG00000130822	-0.287674	0.422589	-0.191686	0.836231	-0.121285	0.888116
TTCCCTACTGCATCTTGACCGTGA	TRCN0000465808	EIF2B4	eukaryotic translation initiation factor 2B subunit delta		8890	ENSG00000115211	0.10008	0.905887	0.210473	0.931605	-0.150994	0.926152
TCTGATGACATGGCTGAGCTTGGT	TRCN0000465809	NAT14	N-acetyltransferase 14 (putative)	GCN5 related N-acetyltransferases	57106	ENSG00000090971	-0.349335	0.254794	-0.378818	0.378741	-0.233018	0.676552
ATACCTTGAAAATTCGGAATATGT	TRCN0000465810	CHCHD2	coiled-coil-helix-coiled-coil-helix domain containing 2	Mitochondrial coiled-coil-helix-coiled-coil-helix domain containing proteins	51142	ENSG00000106153	0.114254	0.712504	0.192633	0.736917	0.177259	0.682444
AGGTTTAAGGCTCCGCATCTAATC	TRCN0000480065	CHCHD2	coiled-coil-helix-coiled-coil-helix domain containing 2	Mitochondrial coiled-coil-helix-coiled-coil-helix domain containing proteins	51142	ENSG00000106153	0.0571941	0.94643	0.0950413	0.966764	0.0847942	0.955961
ATATCTGGTCCATGAATATCTTTC	TRCN0000465811	LRRC61	leucine rich repeat containing 61		65999	ENSG00000127399	0.148499	0.703368	0.191598	0.782226	0.360485	0.276839
CACCCCTCAGCTCAGTCGCCGATC	TRCN0000465812	DAXX	death domain associated protein		1616	ENSG00000204209	-0.358358	0.450117	-0.313071	0.846999	-0.165209	0.898832
GTTACTCAGGCAAATCTAAGTTAT	TRCN0000465813	KRTAP19-1	keratin associated protein 19-1	Keratin associated proteins	337882	ENSG00000184351	0.208021	0.586647	0.0812736	0.932828	0.154438	0.817342
ACTTAAGAACTGACTCACTTATAC	TRCN0000465814	KCNQ1DN	KCNQ1 downstream neighbor		55539	ENSG00000237941	-0.0747002	0.89397	-0.33194	0.77124	0.192559	0.778461
TCAACCCTCCTCCCTGCCTTACCC	TRCN0000465815	HAUS8	HAUS augmin like complex subunit 8	HAUS augmin like complex	93323	ENSG00000131351	-0.0368225	0.927916	-0.119323	0.873505	-0.0775813	0.903396
ACGCTCCGACACAGCGGGAGACCT	TRCN0000465816	VCY	variable charge Y-linked	Variable charge X/Y family	9084	ENSG00000129864	0.0165909	0.969788	-0.0635917	0.932003	-0.070477	0.899491
AAACCAGCTGTTTCAAATCCATGC	TRCN0000479593	WDR76	WD repeat domain 76	WD repeat domain containing	79968	ENSG00000092470	0.136031	0.864263	-0.00392903	0.996414	0.0547154	0.981193
ACGCGACGGGTCAACGCCGTATCC	TRCN0000465817	WDR76	WD repeat domain 76	WD repeat domain containing	79968	ENSG00000092470	0.0341403	0.969315	-0.117334	0.95868	0.00523028	0.996999
CAACAGGACTGTTGGACGCTCACC	TRCN0000465818	BBS5	Bardet-Biedl syndrome 5	Bardet-Biedl syndrome associated|BBSome	129880	ENSG00000163093	-0.129432	0.656755	0.0771079	0.913651	-0.113918	0.885611
ACTCATCGTGCATCACCAGACCCT	TRCN0000465819	CLEC2D	C-type lectin domain family 2 member D	C-type lectin domain containing	29121	ENSG00000069493	0.0532784	0.896556	0.0216715	0.972294	0.103054	0.829877
TTCTAATCCAAGTCATCCATAGCT	TRCN0000465820	FAM160B1	family with sequence similarity 160 member B1	Armadillo-like helical domain containing	57700	ENSG00000151553	-0.0352025	0.965644	0.110586	0.96295	0.280191	0.75511
ACCGACGCATGTGACATACGACTG	TRCN0000465821	CERS3	ceramide synthase 3	CERS class homeoboxes	204219	ENSG00000154227	-0.0939964	0.786994	-0.0441997	0.964595	-0.180897	0.75091
CGTAAACGGGGCGCCCAGACCGTC	TRCN0000472321	CERS3	ceramide synthase 3	CERS class homeoboxes	204219	ENSG00000154227	-0.178857	0.514341	-0.218976	0.73042	-0.19794	0.622495
CTCTAAGCGAGGCTGTCCCCTTAA	TRCN0000465822	C1QB	complement C1q B chain	Complement system activation components|C1q domain containing	713	ENSG00000173369	-0.074151	0.876332	0.0399462	0.963618	0.0457744	0.954532
ATCTCGAGAAGTACGGTCTTTTTA	TRCN0000475244	KYAT1	kynurenine aminotransferase 1		883	ENSG00000171097	0.0799723	0.846882	0.139434	0.858547	0.236453	0.604483
CCGTCTGTTACTCGGGCCCATTAG	TRCN0000491494	KYAT1	kynurenine aminotransferase 1		883	ENSG00000171097	-0.131137	0.709135	-0.14783	0.852086	-0.043511	0.959608
AGATATATCGTTTCAACCCTCACC	TRCN0000465823	KYAT1	kynurenine aminotransferase 1		883	ENSG00000171097	0.00766111	0.990031	-0.0243645	0.988665	0.136956	0.870454
GTATCACGCCGGCCAATCATCGGC	TRCN0000465824	AANAT	aralkylamine N-acetyltransferase	GCN5 related N-acetyltransferases	15	ENSG00000129673	0.121763	0.758162	-0.0507507	0.963876	-0.0078047	0.99426
GCGTCCCAGAGCGCATCTACATGG	TRCN0000465825	SPESP1	sperm equatorial segment protein 1		246777	ENSG00000258484	0.207211	0.740128	0.1918	0.934084	0.218802	0.854031
GCACAAGACTGCGTGCGGCTCAGA	TRCN0000465826	GSPT2	G1 to S phase transition 2		23708	ENSG00000189369	-0.161157	0.69348	-0.279473	0.599931	-0.0814647	0.931853
TTAGACAAGAGATTTTGGCTGACA	TRCN0000465827	DNAJB6	DnaJ heat shock protein family (Hsp40) member B6	DNAJ (HSP40) heat shock proteins	10049	ENSG00000105993	-0.00176597	NA	0.00708216	NA	-0.0296278	NA
CCCTACCTAGCGGGTCATGTGAGA	TRCN0000465829	ZSCAN12	zinc finger and SCAN domain containing 12	Zinc fingers C2H2-type|SCAN domain containing	9753	ENSG00000158691	NA	NA	NA	NA	-0.00832766	NA
AAGGACGGCCAGCCGTTGAGTTGG	TRCN0000465830	DLGAP2	DLG associated protein 2		9228	ENSG00000198010	0.102601	0.916741	0.055533	0.984319	0.161648	0.9308
GGTGAATCGTCTTCGATGACGGTC	TRCN0000478929	DLGAP2	DLG associated protein 2		9228	ENSG00000198010	-0.820714	0.0544484	-0.249249	0.946121	-0.269728	0.864016
CGACGACCCGGGAATTGTCAGCCC	TRCN0000465831	DPP8	dipeptidyl peptidase 8	DASH family	54878	ENSG00000074603	-0.15441	0.742886	-0.259456	0.736883	-0.250163	0.746114
GAAATAGCTCGTGCACACTAACCA	TRCN0000465832	SFRP2	secreted frizzled related protein 2	Secreted frizzled-related proteins	6423	ENSG00000145423	0.0708949	0.842064	0.121535	0.875375	0.0998457	0.844596
TTTAGGACTAAAAGTTTGTCTACT	TRCN0000465834	RPS19	ribosomal protein S19	S ribosomal proteins	6223	ENSG00000105372	0.135669	0.692853	0.171243	0.816352	0.236261	0.514814
CTACTCTTTCTCCTAACTGGGATG	TRCN0000465835	ENSA	endosulfine alpha		2029	ENSG00000143420	-0.14835	0.571585	0.111842	0.841922	-0.0516776	0.932741
CAAACCACCATAATATAATTTTTC	TRCN0000468409	ENSA	endosulfine alpha		2029	ENSG00000143420	0.0234209	0.958382	0.135774	0.808007	0.085994	0.858675
CGAACCTTAAACAAAGCACCCGAA	TRCN0000466484	ENSA	endosulfine alpha		2029	ENSG00000143420	-0.100527	0.760909	-0.179869	0.7164	-0.265217	0.468168
GCCGCGATCCGTACCATGCAACGT	TRCN0000465836	PTRHD1	peptidyl-tRNA hydrolase domain containing 1		391356	ENSG00000184924	-0.0561299	0.845323	0.0184462	0.973914	0.0951911	0.822177
ATGGTTCCGCCAAACGTGCTTTTC	TRCN0000465838	GIF	gastric intrinsic factor		2694	ENSG00000134812	0.19137	0.628758	0.155775	0.85383	0.20542	0.680101
ATATTCTCGCTCGCTTACTTGGGA	TRCN0000465840	ALMS1P1	ALMS1, centrosome and basal body associated protein pseudogene 1		200420	ENSG00000163016	0.190298	0.64215	0.328471	0.581768	0.207861	0.73725
ACCCTAGGACTAGCTCCCCAAACC	TRCN0000465841	UQCRB	ubiquinol-cytochrome c reductase binding protein	Mitochondrial complex III: ubiquinol-cytochrome c reductase complex subunits	7381	ENSG00000156467	0.0515205	0.943339	0.0470261	0.983399	0.113887	0.906554
GAGGCAGATTAAAGCATGGCATAC	TRCN0000465842	CISD1	CDGSH iron sulfur domain 1	CDGSH iron sulfur domain containing	55847	ENSG00000122873	0.172663	0.589088	0.124644	0.871692	0.0971747	0.898303
TAGAATAAACAGTTAAGCGACCTT	TRCN0000472540	DEFB104A	defensin beta 104A	Defensins, beta	140596	ENSG00000176782	0.0300072	0.925695	-0.0646544	0.91978	-0.0870253	0.844517
CGAACACCGACTGTTCTGACATTC	TRCN0000465844	DEFB104A	defensin beta 104A	Defensins, beta	140596	ENSG00000176782	-0.257037	0.137739	-0.156335	0.685177	-0.299744	0.137388
GATAAATTAACAAATTCACTATGT	TRCN0000465845	GGPS1	geranylgeranyl diphosphate synthase 1		9453	ENSG00000152904	0.123687	0.697732	0.217298	0.745146	0.216519	0.593271
CTCCGGAATGAATTCCATTAGAAA	TRCN0000465846	PCDHB16	protocadherin beta 16	Clustered protocadherins	57717	ENSG00000272674	-0.160591	0.723929	-0.0700538	0.955094	-0.101463	0.917107
AGCCATCATACTTAGTTCCACCGC	TRCN0000465847	MRPL21	mitochondrial ribosomal protein L21	Mitochondrial ribosomal proteins	219927	ENSG00000197345	0.120573	0.655129	0.0388044	0.962361	0.16381	0.647219
TTCGTCTGTAGCACAAATGTTCAG	TRCN0000489193	GPR157	G protein-coupled receptor 157	7TM orphan receptors	80045	ENSG00000180758	0.0849194	0.825067	0.198916	0.782011	0.192198	0.652858
GACCGCTCTCGCCACAGGCCGCTG	TRCN0000487856	GPR157	G protein-coupled receptor 157	7TM orphan receptors	80045	ENSG00000180758	-0.131833	0.685195	-0.112126	0.882265	-0.100319	0.867851
CTCCTTTGCAGAATTGCACACCCT	TRCN0000489064	GPR157	G protein-coupled receptor 157	7TM orphan receptors	80045	ENSG00000180758	-0.0108223	0.983541	0.192985	0.676856	0.00337209	0.996007
CGGGATTTCACAGCTCGTGCATGC	TRCN0000488222	GPR157	G protein-coupled receptor 157	7TM orphan receptors	80045	ENSG00000180758	-0.318393	0.19526	-0.252707	0.391872	-0.329044	0.128167
TGACTAAATTTTATTATAACCCGG	TRCN0000465848	GPR157	G protein-coupled receptor 157	7TM orphan receptors	80045	ENSG00000180758	-0.081822	0.804429	-0.0626458	0.932549	-0.0457321	0.948001
AGTTCACTATCAATGTATGGCTTT	TRCN0000465850	PSMC5	proteasome 26S subunit, ATPase 5	AAA ATPases|Proteasome	5705	ENSG00000087191	0.147644	0.754114	0.0249368	0.97952	0.00972435	0.989653
CTCTCCCGCTAGCACTGCACCTCA	TRCN0000465851	2018-03-05	membrane associated ring-CH-type finger 5	Ring finger proteins|Membrane associated ring-CH-type fingers	54708	ENSG00000198060	0.0330261	0.947573	0.108467	0.907584	-0.0403569	0.97094
CATAGTAGCGCACTACAGTTTAGC	TRCN0000465852	REEP6	receptor accessory protein 6	Receptor accessory proteins	92840	ENSG00000115255	0.172045	0.648549	0.0409651	0.967365	0.22753	0.68069
ACGCTTACCGCACCAGTAAGAATT	TRCN0000465853	TRIM43	tripartite motif containing 43	Ring finger proteins|Tripartite motif containing	129868	ENSG00000144015	0.102309	0.766641	0.128915	0.872158	-0.0393818	0.957139
GCCATTTCAGTCTTGAGAGTGACG	TRCN0000465854	CCL2	C-C motif chemokine ligand 2	Chemokine ligands|Endogenous ligands	6347	ENSG00000108691	0.0306882	0.941411	0.0043771	0.992704	0.115202	0.835463
GTGTGCAGTCCAACCCATCTGCGG	TRCN0000467941	CCL2	C-C motif chemokine ligand 2	Chemokine ligands|Endogenous ligands	6347	ENSG00000108691	0.00465398	0.993263	0.0102491	0.989429	-0.00692391	0.994799
TCATACGATCATAGCGAAGCCTTT	TRCN0000465855	UBE2Q1	ubiquitin conjugating enzyme E2 Q1	Ubiquitin conjugating enzymes E2	55585	ENSG00000160714	0.00284021	0.99371	-0.0470665	0.957233	-0.0169923	0.985513
AGGCGGGGACTCAGTGTCTATGGC	TRCN0000472859	HIST1H1T	histone cluster 1 H1 family member t	Histones	3010	ENSG00000187475	-0.00684064	0.984048	-0.051371	0.93569	-0.109752	0.738472
TCATCAAGTAATTAGGGTCGGTTC	TRCN0000465858	HIST1H1T	histone cluster 1 H1 family member t	Histones	3010	ENSG00000187475	0.117363	0.612241	0.160926	0.703164	0.106173	0.832459
CCTGATTCTTCAATATCCATGTAT	TRCN0000465859	KTI12	KTI12 chromatin associated homolog		112970	ENSG00000198841	-0.137922	0.567992	-0.0233297	0.97892	-0.024697	0.9794
TTATTTGGGAGCACATGAATTCAA	TRCN0000465860	HEATR9	HEAT repeat containing 9	Armadillo-like helical domain containing	256957	ENSG00000270379	0.17045	0.425196	0.156519	0.686449	0.180825	0.603236
TATCTAGGGATAAAATCTACCATT	TRCN0000470686	HEATR9	HEAT repeat containing 9	Armadillo-like helical domain containing	256957	ENSG00000270379	0.0454874	0.930165	0.110274	0.907584	0.00512766	0.994596
ACCTATGGCCATGGACCGGCTGAA	TRCN0000465861	P3H2	prolyl 3-hydroxylase 2		55214	ENSG00000090530	0.174224	0.635567	0.0677294	0.94184	0.0202334	0.982608
AAACGTCGCGTCCATGCTGTTGCC	TRCN0000465862	CALHM2	calcium homeostasis modulator family member 2	Calcium homeostasis modulators	51063	ENSG00000138172	-0.0229594	NA	0.00397534	0.999361	0.38705	0.812453
CCGTGCAACTTTGTCGACCACATC	TRCN0000465863	LMBRD1	LMBR1 domain containing 1		55788	ENSG00000168216	-0.117759	0.907338	-0.0213472	0.994487	-0.095712	0.969516
GATATCCTGGCTTTAGGAGCGTAC	TRCN0000465864	TAGAP	T cell activation RhoGTPase activating protein	Rho GTPase activating proteins	117289	ENSG00000164691	0.140417	0.686965	0.00778399	0.989384	0.240927	0.569552
GATAGTCATTAAACTTCTAAGGTC	TRCN0000475921	TAGAP	T cell activation RhoGTPase activating protein	Rho GTPase activating proteins	117289	ENSG00000164691	0.0821873	0.950788	0.215778	0.949875	0.21549	0.924168
CCAGCAGTGCTCGCAGGGGAAGCC	TRCN0000465866	OSBPL8	oxysterol binding protein like 8	Oxysterol binding proteins|Pleckstrin homology domain containing	114882	ENSG00000091039	0.158685	0.869642	-0.378838	0.909737	-0.0403153	0.992648
TAGGGGCTGACTTGTATCCATACG	TRCN0000465867	OGFOD2	2-oxoglutarate and iron dependent oxygenase domain containing 2		79676	ENSG00000111325	-0.108587	0.714663	-0.0886473	0.884917	-0.164963	0.644435
TCGACCCCGAATAAACTTGGCATC	TRCN0000465868	CTTN	cortactin		2017	ENSG00000085733	0.0186095	0.986014	-0.403659	0.828534	-0.538076	0.490076
ATAAGGGATATTGAACAACTGAAC	TRCN0000466297	BTF3	basic transcription factor 3		689	ENSG00000145741	0.183603	0.51195	0.133368	0.855258	0.06047	0.937752
TGTTTAACGTTGTTGGGTCATAAC	TRCN0000465869	BTF3	basic transcription factor 3		689	ENSG00000145741	-0.0260087	0.966619	-0.253036	0.724819	0.137154	0.839117
TTCGCGACAAGTTCACTTTGATAA	TRCN0000465870	MYD88	MYD88, innate immune signal transduction adaptor	TIR domain containing|My-T-BRC complex	4615	ENSG00000172936	0.0335458	0.936923	0.00982021	0.986665	0.156352	0.707456
TTAGCTCTTCTGCGATGGGTGTTT	TRCN0000465871	SCAND2P	SCAN domain containing 2 pseudogene		54581	ENSG00000176700	0.188808	0.562659	0.0149075	0.98513	0.13076	0.821613
GTAGAGTCACTGCCTTGTCCTAGG	TRCN0000465872	MT1E	metallothionein 1E	Metallothioneins	4493	ENSG00000169715	0.00508784	0.985693	0.0725794	0.910662	0.10509	0.812985
AGATTTTCATGCAACTTTTCTCGA	TRCN0000467056	MT1E	metallothionein 1E	Metallothioneins	4493	ENSG00000169715	0.188035	0.50392	0.10904	0.878642	0.089558	0.886608
CCACTATTCTCGCAAAACGTTTTC	TRCN0000465874	DNAJC11	DnaJ heat shock protein family (Hsp40) member C11	DNAJ (HSP40) heat shock proteins	55735	ENSG00000007923	-0.0828369	0.861401	-0.166682	0.914912	-0.0192067	0.987383
AGCCTTCGTAGATGATTCGTGCTT	TRCN0000469711	DNAJC11	DnaJ heat shock protein family (Hsp40) member C11	DNAJ (HSP40) heat shock proteins	55735	ENSG00000007923	0.0193809	0.975921	0.034124	0.974884	-0.191682	0.844735
TCTCCACTCTCTTGAGCCTGCTCG	TRCN0000465875	DNAJC1	DnaJ heat shock protein family (Hsp40) member C1	Myb/SANT domain containing|DNAJ (HSP40) heat shock proteins	64215	ENSG00000136770	0.0631494	0.884729	0.135111	0.866337	-0.0107802	0.992652
GATCCTCACGCCACGCATGCATTA	TRCN0000465876	KRBOX4	KRAB box domain containing 4		55634	ENSG00000147121	-0.0133684	0.986474	0.247693	0.893838	0.0601646	0.976529
AACAGAGGGTGCTGCATACATATC	TRCN0000465877	GNG12	G protein subunit gamma 12	G protein subunits gamma	55970	ENSG00000172380	0.0115139	0.978455	0.136053	0.822922	0.0111078	0.986734
ACACTGGGATAATCTTGTACGCTG	TRCN0000465878	LRRK2	leucine rich repeat kinase 2	Parkinson disease associated genes|Roco domain containing|Armadillo-like helical domain containing	120892	ENSG00000188906	-0.278398	0.603862	-0.132709	0.950623	-0.155345	0.914189
TGGCAACCAATAACTTGAATACAA	TRCN0000465880	SPINK7	serine peptidase inhibitor, Kazal type 7 (putative)	Serine peptidase inhibitors, Kazal type	84651	ENSG00000145879	-0.163739	0.557754	-0.136962	0.818778	-0.102128	0.796523
TGAGTTATTATACCGCAGATCAAG	TRCN0000465881	MUSTN1	musculoskeletal, embryonic nuclear protein 1		389125	ENSG00000272573	-0.128487	0.718537	0.0304534	0.970913	-0.0616445	0.933023
AAGGATTACATCCCCCTCATGGGT	TRCN0000465882	AHNAK2	AHNAK nucleoprotein 2	PDZ domain containing	113146	ENSG00000185567	0.204175	0.579192	0.214899	0.767942	0.0636357	0.937818
CTCAAGAGTACCAACAATTCGGTT	TRCN0000465883	GPC5	glypican 5	Glypicans	2262	ENSG00000179399	-0.166959	0.635761	-0.161209	0.84309	-0.132623	0.886727
CCGAACCATAATTAGGCGGTCATG	TRCN0000465884	LZTFL1	leucine zipper transcription factor like 1	Bardet-Biedl syndrome associated	54585	ENSG00000163818	0.137726	0.697033	-0.0523349	0.962457	-0.0584131	0.941087
GGATATGCGTCTAGCGCAAAACCG	TRCN0000469753	LZTFL1	leucine zipper transcription factor like 1	Bardet-Biedl syndrome associated	54585	ENSG00000163818	-0.0235881	0.957365	0.0171791	0.97701	0.00925023	0.988068
TCGTTTCTTTTATGTTATAGGCAA	TRCN0000465885	TMEM246	transmembrane protein 246		84302	ENSG00000165152	0.128888	0.740048	0.120132	0.878967	0.0893773	0.906308
TCAAACACCCGTGAACGTATACAC	TRCN0000478268	KRTCAP2	keratinocyte associated protein 2	Oligosaccharyltransferase complex subunits	200185	ENSG00000163463	-0.0599821	0.81108	-0.0939697	0.856729	-0.0951259	0.804136
CGTACAGTGATAGGTTTCCCTCAA	TRCN0000465886	KRTCAP2	keratinocyte associated protein 2	Oligosaccharyltransferase complex subunits	200185	ENSG00000163463	-0.136374	0.611021	-0.110425	0.851873	-0.118941	0.775984
ACCCGATCCTGGGATTCCCTATCG	TRCN0000465887	CBFB	core-binding factor subunit beta		865	ENSG00000067955	-0.109432	0.777195	-0.021798	0.982483	-0.0322258	0.973468
AGCGACACACGAAATTTACTGCAG	TRCN0000465889	FUT2	fucosyltransferase 2	Fucosyltransferases	2524	ENSG00000176920	-0.0619223	0.824286	-0.0474339	0.944476	-0.073938	0.879225
TCGTCGCGCTCTGCGGGCTGATTA	TRCN0000471573	FUT2	fucosyltransferase 2	Fucosyltransferases	2524	ENSG00000176920	0.00226423	0.993711	-0.0459899	0.955444	-0.0702895	0.903137
AAGTTGCACTGGAGATTTACGACA	TRCN0000465891	KAZN	kazrin, periplakin interacting protein	Sterile alpha motif domain containing	23254	ENSG00000189337	0.233659	0.763866	0.205932	0.937543	-0.0260799	0.992648
CAAGTAGTGCTATACTTATTTTTT	TRCN0000466369	KAZN	kazrin, periplakin interacting protein	Sterile alpha motif domain containing	23254	ENSG00000189337	-0.0723981	0.865213	0.0850372	0.927469	0.0567868	0.942805
TGACTCGGTCACCGGAGAGGATTT	TRCN0000465892	PHF20L1	PHD finger protein 20 like 1	PHD finger proteins|Tudor domain containing	51105	ENSG00000129292	-0.14409	0.683002	-0.115816	0.902616	-0.199622	0.709669
ACATATTCCTGAGATAGCATTCCT	TRCN0000467004	PHF20L1	PHD finger protein 20 like 1	PHD finger proteins|Tudor domain containing	51105	ENSG00000129292	0.118348	0.821155	-0.0172969	0.992455	0.200208	0.741493
TTCCGCCCTGTATTCCGGTACGTC	TRCN0000465893	ENTPD2	ectonucleoside triphosphate diphosphohydrolase 2		954	ENSG00000054179	0.00881703	0.993453	-0.0880539	0.966633	-0.105596	0.946421
GAATTTACCAGGTTTGATCACAAA	TRCN0000465894	RIDA	reactive intermediate imine deaminase A homolog		10247	ENSG00000132541	0.153952	0.40998	0.179666	0.544896	0.193242	0.431582
TGGTACACAGTCATTTGCATACCT	TRCN0000465896	SAMD4A	sterile alpha motif domain containing 4A	Sterile alpha motif domain containing|Armadillo-like helical domain containing	23034	ENSG00000020577	-0.0897347	0.824738	-0.144632	0.882855	-0.255387	0.512648
GCGTCCTGTCCTACTGCTGGTGAC	TRCN0000469313	SAMD4A	sterile alpha motif domain containing 4A	Sterile alpha motif domain containing|Armadillo-like helical domain containing	23034	ENSG00000020577	0.0491508	0.960935	0.00563663	0.999361	-0.0792216	0.967634
TAACATCATGGATAGATATGTGGT	TRCN0000491644	SAMD4A	sterile alpha motif domain containing 4A	Sterile alpha motif domain containing|Armadillo-like helical domain containing	23034	ENSG00000020577	-0.196055	0.724645	-0.0485521	0.966358	-0.0742501	0.962271
AACAGAGGCCCACTTTCTTTACCA	TRCN0000465898	PACSIN3	protein kinase C and casein kinase substrate in neurons 3	F-BAR domain containing	29763	ENSG00000165912	0.0912492	0.836863	-0.00946591	0.994569	0.0731395	0.899033
GAGAGTTCGCTCAGAAAAATCGGC	TRCN0000465899	LHX8	LIM homeobox 8	LIM class homeoboxes	431707	ENSG00000162624	0.215901	0.473713	0.164163	0.817018	0.0359313	0.972164
ATTCCTCCCTATGTAGTTTGACCC	TRCN0000478463	TTLL2	tubulin tyrosine ligase like 2	Tubulin tyrosine ligase family	83887	ENSG00000120440	0.246469	0.704496	0.380715	0.77124	0.243453	0.840573
ACCTAGCCAACGACGCGGATCGTT	TRCN0000465900	TTLL2	tubulin tyrosine ligase like 2	Tubulin tyrosine ligase family	83887	ENSG00000120440	-0.0815321	0.86276	-0.271846	0.660153	-0.0577234	0.950767
ACACGTCCTAACCAGTCCAGGGGA	TRCN0000465901	ARG1	arginase 1		383	ENSG00000118520	0.0769869	0.93806	0.237255	0.925512	0.0286265	0.992648
ACATAGTAGAATTAAACCTCGTAC	TRCN0000465902	POLR2D	RNA polymerase II subunit D	RNA polymerase subunits	5433	ENSG00000144231	0.0449385	0.92645	-0.012018	0.994059	0.309027	0.402912
AGTACCGCGTCTGTCCTGGATTCA	TRCN0000465904	MRPS36	mitochondrial ribosomal protein S36	Mitochondrial ribosomal proteins	92259	ENSG00000134056	0.0750554	0.844258	-0.0723608	0.938889	-0.0996917	0.862183
TAATCAAATAAGTATCCCCGATCA	TRCN0000465905	DIAPH1	diaphanous related formin 1	Deafness associated genes|Armadillo-like helical domain containing	1729	ENSG00000131504	0.0955425	0.813405	-0.00950138	0.994606	0.152627	0.759622
CCACGCTGCTAGGGAAGCCTGGGC	TRCN0000488261	GPR182	G protein-coupled receptor 182	G protein-coupled receptors, Class A orphans	11318	ENSG00000166856	-0.22012	0.377794	-0.197606	0.750548	-0.128239	0.79318
CCTACGTAACGGAGAAAAAAGAAC	TRCN0000488637	GPR182	G protein-coupled receptor 182	G protein-coupled receptors, Class A orphans	11318	ENSG00000166856	-0.0929746	0.808929	0.00217554	0.9929	-0.221366	0.611938
CCGATCGTATGCCCGGGCTACAGT	TRCN0000465909	GPR182	G protein-coupled receptor 182	G protein-coupled receptors, Class A orphans	11318	ENSG00000166856	-0.160576	0.565308	-0.109847	0.88839	-0.143314	0.771707
CTATGCAGGCATAGCACATTAATA	TRCN0000465910	ARMCX3	armadillo repeat containing X-linked 3	Armadillo repeat containing	51566	ENSG00000102401	-0.12608	0.904808	-0.400954	0.828867	-0.214507	0.902199
AAACTTCGGATATCTATTGCGGCC	TRCN0000465911	ATP6V0D1	ATPase H+ transporting V0 subunit d1	V-type ATPases	9114	ENSG00000159720	0.324839	0.523677	0.136477	0.957434	0.358048	0.658756
TTTTATGGAACCTATCATTCAATT	TRCN0000489322	NEK3	NIMA related kinase 3		4752	ENSG00000136098	0.222747	0.805114	0.0910912	0.973216	0.146179	0.945434
ACTGATCCGGAGACCTCTTGCGGG	TRCN0000465913	NEK3	NIMA related kinase 3		4752	ENSG00000136098	-0.0704355	0.951191	0.140657	0.961492	0.235202	0.878389
ACGAGTGCAACTTTACATCTACAT	TRCN0000468920	DCAKD	dephospho-CoA kinase domain containing		79877	ENSG00000172992	0.0744336	0.95269	0.184624	0.954672	-0.0340356	0.992648
ACAGGCTATCTCGGTAAAGTGATA	TRCN0000465914	DCAKD	dephospho-CoA kinase domain containing		79877	ENSG00000172992	0.117132	0.787176	-0.0797633	0.938665	0.0904793	0.912027
CCATCAGTCGCCGTTGCAGCGCGC	TRCN0000465916	AMOT	angiomotin		154796	ENSG00000126016	-0.194083	0.611729	-0.171227	0.876718	-0.0803806	0.936426
TCTGCGTGGACTTTCAGGGTCAGA	TRCN0000465917	RAB1B	RAB1B, member RAS oncogene family	RAB, member RAS oncogene GTPases	81876	ENSG00000174903	-0.0536275	0.897742	-0.0899573	0.904882	0.0753881	0.901103
TGGCTCCTCACAGTAAGTGCAGAC	TRCN0000465918	HEXIM2	hexamethylene bisacetamide inducible 2		124790	ENSG00000168517	-0.2271	0.648253	-0.0832156	0.966633	0.0174736	0.984907
GACTAGGCGATGGCCGGCGGTGTA	TRCN0000474858	C12orf10	chromosome 12 open reading frame 10		60314	ENSG00000139637	0.0660128	0.774533	0.0923645	0.825899	0.0616172	0.879061
TCGTATGCGATTGTTCAACGGTCC	TRCN0000465919	C12orf10	chromosome 12 open reading frame 10		60314	ENSG00000139637	0.0536281	0.902165	-0.0110349	0.993897	0.0869489	0.901737
TGATCCCCCGCCACATTGAGGCCC	TRCN0000465921	CCNDBP1	cyclin D1 binding protein 1		23582	ENSG00000166946	-0.0986106	0.787245	-0.0483021	0.9592	-0.13094	0.827599
AGGTTTCCAGATACCGCATGCTTC	TRCN0000465922	DPAGT1	dolichyl-phosphate N-acetylglucosaminephosphotransferase 1		1798	ENSG00000172269	0.319469	0.725603	-0.287469	0.928015	0.151374	0.955588
CGAAAATCCCAACAAGGCAGTAGT	TRCN0000465923	STX12	syntaxin 12	Syntaxins	23673	ENSG00000117758	-0.224827	0.32597	-0.133039	0.837236	-0.383038	0.212106
GTCATGGAGAAAGTCGGTGACCGG	TRCN0000465924	TUBA3D	tubulin alpha 3d	Tubulins	113457	ENSG00000075886	NA	NA	0.024192	NA	NA	NA
TTATATACAGTCTTATCATTAACC	TRCN0000465926	PEX16	peroxisomal biogenesis factor 16	Peroxins	9409	ENSG00000121680	0.258475	0.538625	0.295341	0.610709	0.149496	0.840501
ACCTACCTCCTGACACATCAACTT	TRCN0000470387	CNBP	CCHC-type zinc finger nucleic acid binding protein	Ring finger proteins|Zinc fingers CCHC-type	7555	ENSG00000169714	0.0047985	0.987703	-0.157363	0.759885	-0.0263829	0.969909
TCACACCACCCTTTGCCCGGCGGT	TRCN0000465927	CNBP	CCHC-type zinc finger nucleic acid binding protein	Ring finger proteins|Zinc fingers CCHC-type	7555	ENSG00000169714	-0.325589	0.653067	0.234733	0.933514	0.251466	0.859348
CAAGTCACTTTGCCATTGTGTCTT	TRCN0000465929	NCOA5	nuclear receptor coactivator 5		57727	ENSG00000124160	0.0695799	0.894224	-0.250851	0.85452	0.0146563	0.987609
TAACAAAGATGTCATATTTCTGAA	TRCN0000465930	MOCS2	molybdenum cofactor synthesis 2		4338	ENSG00000164172	-0.00192404	0.997375	-0.0402572	0.966967	0.0206169	0.981282
GTTACTGAGACAACATTACCTACC	TRCN0000465931	CPA1	carboxypeptidase A1	M14 carboxypeptidases	1357	ENSG00000091704	0.124031	0.774201	0.095131	0.912095	0.111048	0.887046
GATACAACACCATACTGAAACTCG	TRCN0000488192	CPA1	carboxypeptidase A1	M14 carboxypeptidases	1357	ENSG00000091704	-0.0338813	0.934694	-0.0475045	0.955579	0.0126621	0.985133
ATCCTCCCCCCGGAGATAATCTAT	TRCN0000492194	IP6K2	inositol hexakisphosphate kinase 2		51447	ENSG00000068745	0.117714	0.801996	0.374424	0.374805	0.135962	0.842266
GCCTATCAGACCGAAGTTGTCGTT	TRCN0000465932	IP6K2	inositol hexakisphosphate kinase 2		51447	ENSG00000068745	0.0875506	0.830881	0.0729622	0.926009	-0.0961712	0.903656
TCGCCTTGAGGCGCCCCCCTGCCA	TRCN0000469002	IP6K2	inositol hexakisphosphate kinase 2		51447	ENSG00000068745	0.173016	0.85014	0.278514	0.917316	0.23031	0.889464
TCATGCCTTCACCTGTGAATGCCT	TRCN0000478629	IP6K2	inositol hexakisphosphate kinase 2		51447	ENSG00000068745	-0.090491	0.852892	0.00264644	0.995267	0.0245432	0.981588
AATGCGTTCGTGACACTTACGCCT	TRCN0000465933	PSMC4	proteasome 26S subunit, ATPase 4	AAA ATPases|Proteasome	5704	ENSG00000013275	0.321573	0.650641	0.0562687	0.984813	0.352028	0.781248
TAAGCATGGTCCACAGGCCTCCTC	TRCN0000471747	PSMC4	proteasome 26S subunit, ATPase 4	AAA ATPases|Proteasome	5704	ENSG00000013275	-0.1334	0.756428	0.0428368	0.966949	-0.253708	0.659991
AGGGATCCAAATCCGCCCCGTTAC	TRCN0000465934	ELAC1	elaC ribonuclease Z 1		55520	ENSG00000141642	0.00540347	0.992149	-0.0707951	0.969623	-0.0408445	0.986534
AATAACATTAGATATCATAGTTAT	TRCN0000465935	TSPAN1	tetraspanin 1	Tetraspanins	10103	ENSG00000117472	0.276791	0.330387	0.284122	0.594398	0.23387	0.61438
GTTTATCCTTCCCCACGTGGATCC	TRCN0000465936	HBG1	hemoglobin subunit gamma 1	Hemoglobin subunits	3047	ENSG00000213934	0.431236	0.0427066	0.314806	0.485736	0.25589	0.586476
GCGTTAGCTAGACATGACAGTTCA	TRCN0000465937	NRG4	neuregulin 4	Neuregulins	145957	ENSG00000169752	0.0554207	0.866923	-0.0598826	0.934516	0.0718416	0.903785
TAGTAAATATATTTCAGCAGTCTT	TRCN0000465938	BANF1	barrier to autointegration factor 1		8815	ENSG00000175334	-0.49089	0.0152696	-0.0777469	0.943787	-0.318223	0.483677
CCTATTAGCTTAATGCGATACTAC	TRCN0000465939	ACTR1A	ARP1 actin related protein 1 homolog A	Actin related proteins	10121	ENSG00000138107	-0.01573	0.978892	0.0323902	0.97081	0.110595	0.880286
GGAACCTGCACCATTTAATATTAT	TRCN0000465941	DPPA3	developmental pluripotency associated 3		359787	ENSG00000187569	0.16474	0.52243	0.169829	0.655041	-0.0660938	0.908545
TGCTTACAGAATAAAATTAACGGA	TRCN0000465942	USH1G	USH1 protein network component sans	Ankyrin repeat domain containing|Sterile alpha motif domain containing	124590	ENSG00000182040	-0.155405	0.768088	-0.106234	0.95868	-0.00189018	0.998735
GGGACTTTTGCACACAAGACAAAA	TRCN0000474538	SPANXC	SPANX family member C		64663	ENSG00000198573	-0.0647164	0.852044	0.00100484	0.993627	-0.127157	0.814569
CAAAGTACCTTACTCCCGGAAGCT	TRCN0000465944	SPANXC	SPANX family member C		64663	ENSG00000198573	-0.0617316	0.869219	0.00145577	0.992067	-0.159813	0.671177
CACCTTTGCATCGTAGGCATCTCC	TRCN0000465945	CXCL16	C-X-C motif chemokine ligand 16	Chemokine ligands|Endogenous ligands|Scavenger receptors	58191	ENSG00000161921	-0.172427	0.506328	-0.0338566	0.967249	-0.0539258	0.934571
ATGACGTAGCCCATCTAACAAATT	TRCN0000465946	EVA1C	eva-1 homolog C		59271	ENSG00000166979	0.200364	0.542433	0.078512	0.932244	0.0633515	0.933774
TCATCGTGGTCTTCAGCGCGGAAA	TRCN0000465947	COX6A2	cytochrome c oxidase subunit 6A2	Mitochondrial complex IV: cytochrome c oxidase subunits	1339	ENSG00000156885	-0.0708494	0.780037	-0.0563643	0.923279	0.0186925	0.975655
GGGTAATGTACGACTTACACTGTC	TRCN0000487753	ERN1	endoplasmic reticulum to nucleus signaling 1		2081	ENSG00000178607	0.0754091	0.93719	0.165626	0.948654	-0.465057	0.71656
GCCACACCTCTAGATATCTCACAT	TRCN0000465948	ERN1	endoplasmic reticulum to nucleus signaling 1		2081	ENSG00000178607	0.203178	0.846423	0.0014707	0.999924	-0.224832	0.912308
GGGGCTGCGAGCAGTATAGCGGCC	TRCN0000491744	ERN1	endoplasmic reticulum to nucleus signaling 1		2081	ENSG00000178607	-0.317592	0.658457	0.0434795	0.988649	-0.410089	0.732645
TCCCAACCTTTAAGGGGCCAACAC	TRCN0000465950	PRR11	proline rich 11		55771	ENSG00000068489	-0.0343402	0.918975	-0.0139383	0.987502	0.0281009	0.962933
CCGCGGTTGTAGGTACATGACAAT	TRCN0000465951	PCGF1	polycomb group ring finger 1	Ring finger proteins|Polycomb group ring fingers	84759	ENSG00000115289	-0.0743639	0.791936	-0.0350662	0.959803	-0.140845	0.693694
GCGGCCCCGGAATTAGAATATCTA	TRCN0000466129	SARS	seryl-tRNA synthetase	Aminoacyl tRNA synthetases, Class II	6301	ENSG00000031698	-0.18572	0.666025	-0.054177	0.956889	0.106133	0.876419
ACATTAGACTGTTTTTCCGTCAAT	TRCN0000465952	SARS	seryl-tRNA synthetase	Aminoacyl tRNA synthetases, Class II	6301	ENSG00000031698	-0.031899	0.962561	0.00410378	0.999924	-0.0962521	0.946455
ACACTCAGAGACAAGACAATAACC	TRCN0000465953	CCDC90B	coiled-coil domain containing 90B		60492	ENSG00000137500	0.232366	0.813585	-0.0170656	NA	0.333	0.868657
TGTTTCGTACCTGTAGTCAACACA	TRCN0000465954	C7orf33	chromosome 7 open reading frame 33		202865	ENSG00000170279	-0.00906311	0.982385	0.0429064	0.946523	-0.157201	0.724984
CGAGCAGACAGACTAGGCTGCGCA	TRCN0000465955	PHF19	PHD finger protein 19	PHD finger proteins|Tudor domain containing	26147	ENSG00000119403	-0.11232	0.939842	-0.258107	0.935734	0.0422926	0.989997
GTCAGGAGCGCGGGCATCAGTATA	TRCN0000472869	PHF19	PHD finger protein 19	PHD finger proteins|Tudor domain containing	26147	ENSG00000119403	-0.022323	0.961688	0.148841	0.834297	0.176352	0.694482
ATTCGAGTTTATCTAAGTTACTTA	TRCN0000465956	GCM1	glial cells missing homolog 1		8521	ENSG00000137270	0.00656123	NA	0.0645276	NA	0.0606862	NA
ACCGGTGGACCCATCACCGCCCGA	TRCN0000465957	APOC3	apolipoprotein C3	Apolipoproteins	345	ENSG00000110245	0.0348544	0.898442	-0.0589149	0.912405	-0.0251736	0.965655
GCTCTGTGACTCAAGTCTACTTGC	TRCN0000491247	APOC3	apolipoprotein C3	Apolipoproteins	345	ENSG00000110245	0.0479659	0.8965	0.111936	0.81757	0.103085	0.783308
AAGCTGAGTCGGGCCAGGGGTGCC	TRCN0000465958	PSTPIP2	proline-serine-threonine phosphatase interacting protein 2	F-BAR domain containing	9050	ENSG00000152229	0.336173	0.276412	0.210888	0.798621	0.255243	0.651605
GTAATTTTCATGTTATTGAATACA	TRCN0000465960	UPRT	uracil phosphoribosyltransferase homolog		139596	ENSG00000094841	0.164918	0.543681	0.21695	0.66324	0.11794	0.833709
ACAAATACAGGGATTTCGTATTAG	TRCN0000465963	DAND5	DAN domain BMP antagonist family member 5	DAN family	199699	ENSG00000179284	0.102712	NA	0.106909	NA	0.0411253	NA
AATGGTCGCTTTTGACGCGCTGGA	TRCN0000465964	PABPC5	poly(A) binding protein cytoplasmic 5	RNA binding motif containing	140886	ENSG00000174740	0.350122	0.179888	0.29257	0.562657	0.1888	0.721549
CTGTAATCCTACAAACCTTTAATC	TRCN0000465965	YTHDC1	YTH domain containing 1		91746	ENSG00000083896	-0.047902	0.961611	-0.163097	0.950768	0.0452611	0.98795
TGCACCAAATCGTATAGACTTAAT	TRCN0000465966	HIST1H3A	histone cluster 1 H3 family member a	Histones	8350	ENSG00000275714	-0.0613909	0.908213	-0.107472	0.904182	-0.296494	0.47786
ACTGAACGAAAGTCCAATTAAAAC	TRCN0000465967	NDUFAF7	NADH:ubiquinone oxidoreductase complex assembly factor 7	Mitochondrial respiratory chain complex assembly factors|Seven-beta-strand methyltransferase motif containing	55471	ENSG00000003509	0.188344	0.652639	0.109448	0.910235	-0.0178366	0.989785
CAGTTTAGCAGGTGGAAATGCTTG	TRCN0000465968	SCAMP4	secretory carrier membrane protein 4	Secretory carrier membrane proteins	113178	ENSG00000227500	-0.175218	0.591465	0.0509324	0.959776	-0.00794273	0.994114
ATAATAAATACATTTACAGATCGA	TRCN0000471351	ACTR1B	ARP1 actin related protein 1 homolog B	Actin related proteins	10120	ENSG00000115073	0.136259	0.855268	0.103327	0.964561	0.190879	0.878262
GCCACCGGCCCCGTCGATTCAGTA	TRCN0000465969	ACTR1B	ARP1 actin related protein 1 homolog B	Actin related proteins	10120	ENSG00000115073	-0.0613305	0.944793	0.104009	0.966633	0.076516	0.971492
AAATCCTAGTAACGCCCCAATATA	TRCN0000465970	RIMKLA	ribosomal modification protein rimK like family member A		284716	ENSG00000177181	0.428224	0.0630832	0.27511	0.57467	0.412827	0.149009
GAGTTGAACGCATTGATGTTACGC	TRCN0000465971	TMEM255A	transmembrane protein 255A		55026	ENSG00000125355	0.0470461	0.910153	0.172557	0.779411	0.29502	0.276235
CAGCATATCTTTGCTACCGCCCTT	TRCN0000465972	EDF1	endothelial differentiation related factor 1	Cilia and flagella associated	8721	ENSG00000107223	-0.0182713	0.969201	-0.0191138	0.98542	-0.0254255	0.978675
GGACATATCAATACCTGTCATGGC	TRCN0000465974	MAT1A	methionine adenosyltransferase 1A		4143	ENSG00000151224	-0.00198858	0.997479	0.169993	0.835086	-0.0820148	0.907178
GACACAGAGAGTCTTGACGCTATT	TRCN0000465977	IRAK4	interleukin 1 receptor associated kinase 4		51135	ENSG00000198001	-0.23853	0.64483	-0.13304	0.953804	-0.187204	0.873973
TACGGTTACCTATTCATGCAACGA	TRCN0000468964	IRAK4	interleukin 1 receptor associated kinase 4		51135	ENSG00000198001	0.0228588	0.981849	0.130988	0.96295	-0.0875083	0.962271
CAGATCAGTTTGAACTTCGAGATT	TRCN0000488753	IRAK4	interleukin 1 receptor associated kinase 4		51135	ENSG00000198001	-0.0739253	0.941618	-0.184244	0.942526	-0.265883	0.82931
GGATTTTCATCCTAAGTGTTCCGT	TRCN0000491357	IRAK4	interleukin 1 receptor associated kinase 4		51135	ENSG00000198001	-0.356439	0.562298	-0.24871	0.930398	-0.190444	0.902199
TCTTTTCCTTCAGCCAATCTGCCC	TRCN0000489711	IRAK4	interleukin 1 receptor associated kinase 4		51135	ENSG00000198001	-0.103137	0.929909	-0.141245	0.964561	-0.197212	0.922677
ATACAAACACTAAGAAAAATGACC	TRCN0000472805	PHTF2	putative homeodomain transcription factor 2		57157	ENSG00000006576	0.104079	0.792217	0.0202432	0.979881	0.185191	0.718774
TTCCGATACCCTGCCCGTAGGATC	TRCN0000474694	PHTF2	putative homeodomain transcription factor 2		57157	ENSG00000006576	0.00434116	0.997087	-0.441719	0.799136	0.182941	0.922677
CCCTACCGTCAGTTCATCCGTGCG	TRCN0000465978	PHTF2	putative homeodomain transcription factor 2		57157	ENSG00000006576	-0.131983	0.691969	-0.0117942	0.992818	0.042694	0.955872
ATTCAATCCGCAACACTGGTATCC	TRCN0000468673	PHTF2	putative homeodomain transcription factor 2		57157	ENSG00000006576	0.159263	0.607114	0.157284	0.829996	0.325917	0.290606
CATCCCAGCCAACTCTTCTTAGCA	TRCN0000465979	C1orf21	chromosome 1 open reading frame 21		81563	ENSG00000116667	-0.248308	0.221628	-0.184647	0.691601	-0.212978	0.55616
TTCGATTTCATTAGCGTTTACTGT	TRCN0000465980	GTF2H5	general transcription factor IIH subunit 5	General transcription factors|Nucleotide excision repair	404672	ENSG00000272047	0.0804224	0.845239	0.208532	0.77956	0.254415	0.462488
AGCCATATATCGTCTATAGTGAAC	TRCN0000465981	GRPEL1	GrpE like 1, mitochondrial	TIM23 complex	80273	ENSG00000109519	-0.0539434	0.840292	-0.0167093	0.983088	-0.0820114	0.825238
TAAAAACCGCAAATACATCTTTGC	TRCN0000471391	IWS1	IWS1, SUPT6H interacting protein		55677	ENSG00000163166	-0.11106	0.826152	0.0751344	0.947435	0.120319	0.904584
TTTTGGTTGACGGAGATATTCTGT	TRCN0000465982	IWS1	IWS1, SUPT6H interacting protein		55677	ENSG00000163166	0.165792	0.543341	0.268664	0.445097	0.153992	0.747212
CACGGGCCCGTCCGTGATTTCTTT	TRCN0000465983	PCDHGA9	protocadherin gamma subfamily A, 9	Clustered protocadherins	56107	ENSG00000261934	-0.0986692	0.929972	-0.427644	0.837239	-0.17521	0.93479
TAAGAGGAAGGCTTACTTACGGTG	TRCN0000480613	PRAMEF5	PRAME family member 5	PRAME family	343068	ENSG00000270601	-0.0812573	0.833565	-0.142628	0.840386	-0.141576	0.759343
CACCCTATCGTCGAGGTCGACTGC	TRCN0000465984	PRAMEF5	PRAME family member 5	PRAME family	343068	ENSG00000270601	0.0764636	0.843801	0.0824282	0.909716	0.00822749	0.990315
GATCTTAATAGATGAAAAAGGGTT	TRCN0000465985	ASB16-AS1	ASB16 antisense RNA 1		339201	ENSG00000267080	-0.207067	0.614389	0.00793302	0.991965	0.154883	0.812226
TGGTCCATTAGTAAAGCCGACCCG	TRCN0000465986	AMTN	amelotin		401138	ENSG00000187689	-0.122454	0.531452	-0.0697361	0.89465	-0.161077	0.568702
CAAGAGCCGTGAGACGTTCAGATC	TRCN0000465987	TBCK	TBC1 domain containing kinase		93627	ENSG00000145348	-0.161808	0.715119	-0.131622	0.904182	-0.296087	0.726909
GGGTTTGGCTTAGTACCATGTGCC	TRCN0000480238	TBCK	TBC1 domain containing kinase		93627	ENSG00000145348	-0.15493	0.698978	-0.322695	0.700914	0.207043	0.71015
CCTAACGGGCAGTGTTTTATGTAT	TRCN0000465988	TBC1D7	TBC1 domain family member 7	TSC complex	51256	ENSG00000145979	0.0614266	0.910429	0.216267	0.812888	0.0585859	0.952416
GCGGGCTACGACACTAGAGAAAGT	TRCN0000469511	TBC1D7	TBC1 domain family member 7	TSC complex	51256	ENSG00000145979	0.061359	0.848279	0.0857901	0.893141	-0.0192415	0.981932
TTATGCGAGTCGGAGAGAGTATAG	TRCN0000465989	PSMA2	proteasome subunit alpha 2	Proteasome	5683	ENSG00000106588	0.129672	0.62877	0.0940174	0.892445	-0.0127836	0.989179
TCAGACGAGTGTAGCCCGCCATTG	TRCN0000465991	SCG5	secretogranin V	Granins	6447	ENSG00000166922	-0.0704292	0.827585	-0.11736	0.877956	-0.135789	0.770208
AGCGACTTCACATGTCTCCTGTTA	TRCN0000465993	DSTN	destrin, actin depolymerizing factor		11034	ENSG00000125868	0.0301379	0.947479	0.0598753	0.924574	-0.0827534	0.879853
CCCTCACACCACGGATTGAGCCTG	TRCN0000465996	WFDC9	WAP four-disulfide core domain 9	WAP four-disulfide core domain containing	259240	ENSG00000180205	-0.138815	0.662256	-0.0347491	0.967249	-0.189144	0.677801
AATCGATTTAACGGTTTTTATCAT	TRCN0000465997	CCL19	C-C motif chemokine ligand 19	Chemokine ligands|Endogenous ligands	6363	ENSG00000172724	0.177183	0.656141	0.128679	0.89592	0.299176	0.550088
GAGTCCTATTCCTCAGCCTTTCTA	TRCN0000489819	SLC22A11	solute carrier family 22 member 11	Solute carriers	55867	ENSG00000168065	0.0319132	0.979214	0.107503	0.968489	-0.0841509	0.975759
GAGGATGTCACACCACGATATCAT	TRCN0000465998	SLC22A11	solute carrier family 22 member 11	Solute carriers	55867	ENSG00000168065	0.0686083	0.91746	-0.0266463	0.986681	-0.0100308	0.993397
CATGGCGATGGACTCTTGTAAGTC	TRCN0000465999	HIST1H3H	histone cluster 1 H3 family member h	Histones	8357	ENSG00000278828	-0.0297744	0.943785	-0.00353431	0.995023	-0.0819405	0.909501
CTCAATTAACCTTCGGAGAAGTTC	TRCN0000467485	HIST1H3H	histone cluster 1 H3 family member h	Histones	8357	ENSG00000278828	-0.0347805	0.905275	-0.0201277	0.979903	-0.0523751	0.91462
ATAACCGATCTTCGAGTCTGGGAC	TRCN0000475609	CSHL1	chorionic somatomammotropin hormone like 1	Growth hormone family	1444	ENSG00000204414	0.140473	0.640135	0.192689	0.742006	0.119676	0.819414
TAACGGGGAACGTTCGTTGATAAT	TRCN0000466000	CSHL1	chorionic somatomammotropin hormone like 1	Growth hormone family	1444	ENSG00000204414	-0.0393458	0.930409	-0.149887	0.846877	-0.0352288	0.968528
CAAGCATGCTGAACCCAGTTAGAA	TRCN0000466002	GPX4	glutathione peroxidase 4	Selenoproteins	2879	ENSG00000167468	-0.0108144	0.98102	-0.0680977	0.9401	-0.0143512	0.99017
AGTCCCTATTAAAGCTTCGGTACG	TRCN0000479656	GPX4	glutathione peroxidase 4	Selenoproteins	2879	ENSG00000167468	-0.0276585	0.980323	0.11955	0.966633	-0.0419579	0.98843
TTTCCCTTTCAATTGTCATAACTA	TRCN0000466003	ADI1	acireductone dioxygenase 1		55256	ENSG00000182551	0.368975	0.39758	0.227372	0.916652	0.272382	0.772785
TGTTATAACTAGAAGTCTCCTGGT	TRCN0000474434	TXNDC12	thioredoxin domain containing 12	Protein disulfide isomerases	51060	ENSG00000117862	0.0318878	0.962797	-0.0454644	0.969107	-0.039373	0.973964
GAAGAGGTGCTTGGTCCACTGAGC	TRCN0000466004	TXNDC12	thioredoxin domain containing 12	Protein disulfide isomerases	51060	ENSG00000117862	-0.037778	0.946131	-0.0934927	0.918244	0.0424192	0.955697
CAACCGCAGTAGCTAGCACTAACG	TRCN0000466005	PCLO	piccolo presynaptic cytomatrix protein	Zinc fingers|C2 domain containing|PDZ domain containing	27445	ENSG00000186472	-0.146527	0.648082	-0.126735	0.887648	-0.0285019	0.977809
GGGGTGACAAGATATGCTGACTAA	TRCN0000466006	PIM1	Pim-1 proto-oncogene, serine/threonine kinase		5292	ENSG00000137193	-0.343993	0.00119375	-0.288604	0.157997	-0.420427	0.000586271
AGGTGTGTGAATAGTTAAGTATGA	TRCN0000489909	PIM1	Pim-1 proto-oncogene, serine/threonine kinase		5292	ENSG00000137193	-0.292779	0.384808	-0.0913286	0.930963	-0.652007	0.0231601
ATGCATGCCCGCAGCTGAAATGTC	TRCN0000481389	PIM1	Pim-1 proto-oncogene, serine/threonine kinase		5292	ENSG00000137193	-0.0767847	0.780671	-0.189928	0.617491	-0.29088	0.186643
TGGCAGTTTGCGAAACGGTAAAAA	TRCN0000468809	PI4KAP2	phosphatidylinositol 4-kinase alpha pseudogene 2		375133	ENSG00000183506	-0.129075	0.78319	-0.499655	0.380757	-0.0599965	0.96066
ACAACCTTGACCTCCTCTTCCTCT	TRCN0000466007	PI4KAP2	phosphatidylinositol 4-kinase alpha pseudogene 2		375133	ENSG00000183506	0.164349	0.712869	0.0101419	0.990469	-0.126361	0.897572
ATTCCACATTACTGCATATGACGG	TRCN0000477717	PI4KAP2	phosphatidylinositol 4-kinase alpha pseudogene 2		375133	ENSG00000183506	0.215318	0.784785	0.16569	0.953254	0.272006	0.842985
GCCGTCTACCAATAGACCACACTT	TRCN0000466008	MTMR11	myotubularin related protein 11	Myotubularins	10903	ENSG00000014914	-0.0399987	0.911459	0.0129509	0.980991	0.0367654	0.94234
CCAACGCTTTGACCTTTGCAGGAG	TRCN0000466009	NCK2	NCK adaptor protein 2	SH2 domain containing	8440	ENSG00000071051	0.00753698	0.988203	-0.0621282	0.955444	-0.233273	0.707504
GCCCTAAGGACAATAGACCAGTAT	TRCN0000466010	CFLAR	CASP8 and FADD like apoptosis regulator	Endogenous ligands|Death effector domain containing|Death inducing signaling complex	8837	ENSG00000003402	-0.157235	0.624965	-0.113225	0.895565	0.121175	0.840509
GTCTACCCGGTGCTCGGTATTGGT	TRCN0000466011	CEP63	centrosomal protein 63		80254	ENSG00000182923	0.175559	0.67886	0.147915	0.870862	0.256067	0.672755
TCCGATCGTACTGATTTAATAAAT	TRCN0000466014	BMP4	bone morphogenetic protein 4	Bone morphogenetic proteins|Endogenous ligands	652	ENSG00000125378	0.0150538	NA	-0.0223711	NA	-0.0185171	NA
GCGAGCTCGAGTAGCCCATACGTT	TRCN0000470134	CDCA4	cell division cycle associated 4		55038	ENSG00000170779	0.216363	0.686659	0.319896	0.797159	0.185731	0.868657
GCAACCCGTAATCTCTTCATGTCC	TRCN0000466015	CDCA4	cell division cycle associated 4		55038	ENSG00000170779	0.137596	0.905193	0.000899769	NA	0.0126591	NA
CTGCCGGCGTGGTCGCGCCGGGCG	TRCN0000466016	LINC02396	long intergenic non-protein coding RNA 2396		283332	ENSG00000258135	0.0852245	0.907338	-0.0775787	0.97011	0.00870191	0.99525
AGACTTACAAACACAAAACACTAA	TRCN0000466017	FAM106CP	family with sequence similarity 106 member C, pseudogene		100129396	ENSG00000266486	0.0714448	0.842538	-0.0290939	0.976903	0.0727224	0.908468
CCGATATTGTCCTTGCTTTGCCTC	TRCN0000466019	CLIC3	chloride intracellular channel 3	Chloride intracellular channels	9022	ENSG00000169583	-0.135392	0.684937	-0.179677	0.824789	-0.149859	0.809851
GAACAATTCTCCAATCTTCAAACA	TRCN0000468948	CDKN2AIPNL	CDKN2A interacting protein N-terminal like		91368	ENSG00000237190	-0.00681036	0.985917	0.126826	0.832629	0.141761	0.705861
ACTGTCAGATTCACTGTCAACTTC	TRCN0000466020	CDKN2AIPNL	CDKN2A interacting protein N-terminal like		91368	ENSG00000237190	0.0536034	0.888124	0.133625	0.849388	0.218457	0.558595
GCAGTCTGTATGCATTACGATCCG	TRCN0000466021	LINC01580	long intergenic non-protein coding RNA 1580		101927129	ENSG00000258785	0.0210224	0.969177	-0.0972515	0.926115	-0.00765936	0.994581
TTACCAAGGATTGAGGAACCATCT	TRCN0000466022	WDR20	WD repeat domain 20	WD repeat domain containing	91833	ENSG00000140153	0.125816	0.597169	0.28238	0.359292	0.144447	0.712087
TTCCTTGAGCATGCGAAAGCAATC	TRCN0000471560	WDR20	WD repeat domain 20	WD repeat domain containing	91833	ENSG00000140153	0.228801	0.653396	-0.119165	0.95554	0.100006	0.948943
AACGACTCTGGGCTGACGTTGCGA	TRCN0000466023	ISL1	ISL LIM homeobox 1	LIM class homeoboxes	3670	ENSG00000016082	-0.0407968	0.957668	0.0401089	0.984813	0.0498838	0.977879
AGAGCGCAATACTCACCCAACCTC	TRCN0000466025	VAMP2	vesicle associated membrane protein 2	Vesicle associated membrane proteins	6844	ENSG00000220205	-0.0702562	0.79631	-0.123203	0.770064	-0.116789	0.706296
GCATTTGCACTACACCAACGTAGT	TRCN0000480646	BCAS1	breast carcinoma amplified sequence 1		8537	ENSG00000064787	-0.102342	0.784175	0.100312	0.907403	0.186698	0.658957
AGGGAGCTTAGAGGAATGATTCAT	TRCN0000480636	BCAS1	breast carcinoma amplified sequence 1		8537	ENSG00000064787	0.0324376	0.95263	-0.079023	0.940394	-0.0300082	0.979358
GTGCGACGCCAGGGCGATAACCTA	TRCN0000466026	BCAS1	breast carcinoma amplified sequence 1		8537	ENSG00000064787	0.121282	0.655129	-0.02131	0.98097	0.0560248	0.919829
GTTATCCAGGCCCAACTCCCATGA	TRCN0000466027	COG8	component of oligomeric golgi complex 8	Components of oligomeric golgi complex	84342	ENSG00000213380	0.125611	0.743507	0.155092	0.849085	0.231983	0.576333
GAAAATACCAAAACAACTCGCCCA	TRCN0000466028	CCDC170	coiled-coil domain containing 170		80129	ENSG00000120262	-0.120224	0.859347	-0.115506	0.95868	0.0515893	0.978085
TTTGCCTTAGCTTACAGAAAGGGA	TRCN0000466029	DDR1	discoidin domain receptor tyrosine kinase 1	Receptor tyrosine kinases|CD molecules	780	ENSG00000204580	-0.00599736	0.995944	0.214668	0.945337	0.12427	0.955961
AGGTGTCTTGTGCACGATTTGGCC	TRCN0000487683	DDR1	discoidin domain receptor tyrosine kinase 1	Receptor tyrosine kinases|CD molecules	780	ENSG00000204580	-0.190444	0.859712	-0.260747	0.931605	-0.449615	0.743392
ATCCCCGTGAAACCCAGATGCTTT	TRCN0000488394	DDR1	discoidin domain receptor tyrosine kinase 1	Receptor tyrosine kinases|CD molecules	780	ENSG00000204580	0.129205	0.790825	0.250425	0.71419	-0.110178	0.937308
ATAGAGCGGACCTGACTTGCTACG	TRCN0000473788	DDR1	discoidin domain receptor tyrosine kinase 1	Receptor tyrosine kinases|CD molecules	780	ENSG00000204580	0.232281	0.777563	0.233775	0.933514	0.157966	0.943154
ATCTAGTCCTCGCAGCTGTTGCTT	TRCN0000488721	DDR1	discoidin domain receptor tyrosine kinase 1	Receptor tyrosine kinases|CD molecules	780	ENSG00000204580	NA	NA	0.0142367	NA	0.0169773	NA
TGGTCATGATTCGGTGTCGTCTGT	TRCN0000492309	DDR1	discoidin domain receptor tyrosine kinase 1	Receptor tyrosine kinases|CD molecules	780	ENSG00000204580	-0.45367	0.436221	-0.204352	0.955366	-0.639833	0.469846
CGAGTTCAGCGGCGGGAATCTAAT	TRCN0000466030	DOK2	docking protein 2		9046	ENSG00000147443	-0.431391	0.0740575	-0.256879	0.654312	-0.313188	0.461335
ATCATTCTCTAGATTTTGCGCAAA	TRCN0000466031	CBLC	Cbl proto-oncogene C	Ring finger proteins	23624	ENSG00000142273	0.220454	0.713125	0.168372	0.941726	0.312242	0.732645
TTATGATGGGTGCAAACGTCTTGT	TRCN0000466033	SLC30A4	solute carrier family 30 member 4	Solute carriers	7782	ENSG00000104154	0.0451686	0.943649	-0.100773	0.95868	-0.0147428	0.992648
TTTTAACACATCTAGGCCTGTTCA	TRCN0000466034	SMPD2	sphingomyelin phosphodiesterase 2		6610	ENSG00000135587	0.52008	0.0672955	0.302067	0.828534	0.387231	0.570756
ATAAGTGTGGCGTTGAGGTACCAC	TRCN0000466035	APOA2	apolipoprotein A2	Apolipoproteins	336	ENSG00000158874	0.134357	0.755954	0.244136	0.674045	0.049243	0.959683
CAACATCGGAAACCCAAACACCAT	TRCN0000466036	D2HGDH	D-2-hydroxyglutarate dehydrogenase		728294	ENSG00000180902	-0.135825	0.640614	0.0146161	0.98513	-0.131036	0.795653
CTTAATCTAACAGAATCTTCCCAA	TRCN0000466037	FAM74A1	family with sequence similarity 74 member A1		401507	ENSG00000215112	-0.0105144	0.979344	0.0553256	0.939379	0.130966	0.711335
ATTACCAGCTCGCGTATTCCACGT	TRCN0000466038	LTB4R	leukotriene B4 receptor	Leukotriene receptors	1241	ENSG00000213903	-0.157722	0.851056	-0.0988383	0.966764	-0.356221	0.742472
TTCGATCGGTTAGCAATCATGTTA	TRCN0000488896	LTB4R	leukotriene B4 receptor	Leukotriene receptors	1241	ENSG00000213903	-0.436747	0.261998	-0.297182	0.828534	-0.377853	0.551889
CTTTCCATTAGCTGTGTGTGCGTG	TRCN0000491676	LTB4R	leukotriene B4 receptor	Leukotriene receptors	1241	ENSG00000213903	-0.371596	0.57186	-0.41318	0.816523	-0.308073	0.840573
AATCACAACTGGAGACGATCATCC	TRCN0000466039	COX20	cytochrome c oxidase assembly factor COX20	Mitochondrial respiratory chain complex assembly factors	116228	ENSG00000203667	0.292904	0.353085	0.200608	0.797819	0.0973765	0.912027
TCGGGATGGATTTGAGCCAAAACA	TRCN0000466041	SGSH	N-sulfoglucosamine sulfohydrolase	Sulfatases	6448	ENSG00000181523	-0.173357	0.617156	-0.160538	0.869321	-0.180606	0.745819
CATTAGCAACTTTCTTTGTCCTCA	TRCN0000466042	P2RY13	purinergic receptor P2Y13	P2Y receptors	53829	ENSG00000181631	0.0520768	0.851306	0.00311895	0.990694	-0.00453607	0.9951
ATAGAGACCCTACCGACATTTCCC	TRCN0000488566	P2RY13	purinergic receptor P2Y13	P2Y receptors	53829	ENSG00000181631	0.24666	0.2922	0.228015	0.677407	0.194086	0.644665
GTAGCGTCTGTTATTCAAATTTTA	TRCN0000488435	P2RY13	purinergic receptor P2Y13	P2Y receptors	53829	ENSG00000181631	0.228631	0.301808	0.287544	0.318193	0.226566	0.475481
ACTGGCTGGCAGGGATATACCGCC	TRCN0000488388	P2RY13	purinergic receptor P2Y13	P2Y receptors	53829	ENSG00000181631	0.138383	0.56173	0.0350434	0.964874	0.0449772	0.942674
TCTCGACATAGAGGAGGGGCTGAC	TRCN0000466043	HACD2	3-hydroxyacyl-CoA dehydratase 2		201562	ENSG00000206527	0.0785998	0.855721	0.0964805	0.917496	-0.0638564	0.94719
CTACTTCAAACGACTTCGACATAT	TRCN0000466044	LRRC40	leucine rich repeat containing 40		55631	ENSG00000066557	0.0113526	0.990362	0.00802471	0.997005	0.000325623	0.999783
GCTCGCCTCTTGTAGCTCAGTAAG	TRCN0000474339	ASIC4	acid sensing ion channel subunit family member 4	Acid sensing ion channel subunits	55515	ENSG00000072182	-0.0489891	0.962035	0.276667	0.909737	0.0896691	0.962615
ATACAGAATGTATTGCAATAAACT	TRCN0000479137	ASIC4	acid sensing ion channel subunit family member 4	Acid sensing ion channel subunits	55515	ENSG00000072182	-0.00883785	0.9923	-0.011402	0.995162	0.0257867	0.992648
TTGGCCCTCATGACACCCTCCTCA	TRCN0000466045	ASIC4	acid sensing ion channel subunit family member 4	Acid sensing ion channel subunits	55515	ENSG00000072182	0.164521	0.695321	-0.060173	0.955189	0.0289146	0.976372
GCGTACTTGTATTCTTCTACGTGG	TRCN0000466047	CMTR2	cap methyltransferase 2	Seven-beta-strand methyltransferase motif containing	55783	ENSG00000180917	0.273437	0.473888	-0.0162331	0.992957	0.103678	0.945434
TATACGATAGGTCATCCACTATAT	TRCN0000470025	MCM5	minichromosome maintenance complex component 5	MCM family	4174	ENSG00000100297	-0.0206312	NA	NA	NA	-0.0447722	NA
TTTTAAGACAAAATGCATTTTCAT	TRCN0000466048	MCM5	minichromosome maintenance complex component 5	MCM family	4174	ENSG00000100297	-0.0371696	0.977756	0.0443612	0.988665	-0.311416	0.869244
TGCTTACCGCAAAACAGCAAGTAG	TRCN0000466049	PLEKHS1	pleckstrin homology domain containing S1	Pleckstrin homology domain containing	79949	ENSG00000148735	-0.149714	0.596083	-0.188856	0.792377	-0.117837	0.817232
GCTAGTAGCCCTATGTAGAGAATC	TRCN0000466050	CRYZL1	crystallin zeta like 1		9946	ENSG00000205758	0.0403502	0.911183	0.190543	0.592662	0.0319956	0.95515
GCCTGTTACCTCATGCACACGTCT	TRCN0000466051	LINC01260	long intergenic non-protein coding RNA 1260		79015	ENSG00000283440	-0.0628317	0.829426	-0.00393464	0.993881	-0.000447632	0.996714
CCCAGCGAGCTATTGCCCAGAAGA	TRCN0000466052	TNPO2	transportin 2	Importins|Armadillo-like helical domain containing	30000	ENSG00000105576	-0.175329	0.698744	-0.14144	0.884111	-0.410364	0.303943
CCAACACGTTGATCTATCGAGCCC	TRCN0000466055	ZMYND19	zinc finger MYND-type containing 19	Zinc fingers MYND-type	116225	ENSG00000165724	-0.13112	0.627813	-0.182801	0.707355	-0.130683	0.777888
GATTGTGGGACCCCCCCAGGACAG	TRCN0000466056	CHMP3	charged multivesicular body protein 3	Charged multivesicular body proteins|ESCRT-III	51652	ENSG00000115561	0.154054	0.565962	0.205367	0.548615	0.182789	0.585378
TTCTCGTTTAACCGATAAAAGTGT	TRCN0000466057	TIRAP	TIR domain containing adaptor protein	TIR domain containing	114609	ENSG00000150455	0.263229	0.785879	0.274616	0.930398	0.092675	0.978543
ATCGGCGGCAGAAGAATAGTAGGG	TRCN0000466059	DYNLRB2	dynein light chain roadblock-type 2	Dyneins, cytoplasmic	83657	ENSG00000168589	-0.0216789	0.983789	-0.0171175	0.994487	-0.195894	0.921279
TAAGTCCGAGACGCCGGACTGCCA	TRCN0000466060	IRF9	interferon regulatory factor 9		10379	ENSG00000213928	0.014362	0.990814	0.185902	0.967882	-0.106811	NA
CTACCCCATCTGTCTTCAGGGTTG	TRCN0000466061	SACM1L	SAC1 like phosphatidylinositide phosphatase	Phosphoinositide phosphatases	22908	ENSG00000211456	-0.112713	0.87653	-0.0998703	0.96295	-0.113128	0.944446
GTCACAATGGTAAGGTGCACGGAA	TRCN0000491553	DUSP23	dual specificity phosphatase 23	Atypical dual specificity phosphatases	54935	ENSG00000158716	0.0802006	0.845068	0.0362685	0.967427	-0.0444768	0.957227
AGCAGGCTTTCTGTGCGGACCCCT	TRCN0000466063	DUSP23	dual specificity phosphatase 23	Atypical dual specificity phosphatases	54935	ENSG00000158716	-0.0242775	0.960531	-0.216337	0.736982	0.0635179	0.930948
AGCTAACCTTCCAGCGCCAGCCTA	TRCN0000466065	BEGAIN	brain enriched guanylate kinase associated		57596	ENSG00000183092	-0.387933	0.0685364	-0.443112	0.122253	-0.403828	0.222264
ACTCACAATAACTGGACTGTAACG	TRCN0000466067	AVPI1	arginine vasopressin induced 1		60370	ENSG00000119986	0.0296016	0.937015	-0.0748787	0.927016	0.0365592	0.953494
TTGCTTCATATCGACTCGACAAAG	TRCN0000466068	HMGB4	high mobility group box 4	Canonical high mobility group	127540	ENSG00000176256	0.0260269	0.947238	0.0340083	0.965327	0.0852568	0.896058
GGGGTCGTGCGACGTTGCGTAGTG	TRCN0000469453	HMGB4	high mobility group box 4	Canonical high mobility group	127540	ENSG00000176256	0.0146459	0.970731	-0.175875	0.827179	-0.0990834	0.886451
TTAGTACTATCCCTGAGCCTCTGC	TRCN0000466069	ZNF77	zinc finger protein 77	Zinc fingers C2H2-type	58492	ENSG00000175691	0.0311948	0.97544	0.0213691	0.994487	-0.172016	0.909088
CCGTAGACTGTAACGTTAATAGGG	TRCN0000491841	NR2C2	nuclear receptor subfamily 2 group C member 2	Nuclear hormone receptors	7182	ENSG00000177463	0.0280564	0.958659	-0.232851	0.814244	-0.0227535	0.981707
GCTATTGACAGTTTAGAGAGAGTT	TRCN0000489583	NR2C2	nuclear receptor subfamily 2 group C member 2	Nuclear hormone receptors	7182	ENSG00000177463	0.210546	0.466291	-0.0155386	0.98892	0.169022	0.750198
GAATTCCCAACAAACTGACATGCA	TRCN0000489859	NR2C2	nuclear receptor subfamily 2 group C member 2	Nuclear hormone receptors	7182	ENSG00000177463	0.287607	0.230505	0.232787	0.696547	0.226035	0.542033
GTAGTTGACTTTACAATATGTATT	TRCN0000489922	NR2C2	nuclear receptor subfamily 2 group C member 2	Nuclear hormone receptors	7182	ENSG00000177463	0.114824	0.762076	0.265024	0.654919	0.253959	0.578664
CGATGCCGCGCTCGGGAAGCGGAT	TRCN0000466070	NR2C2	nuclear receptor subfamily 2 group C member 2	Nuclear hormone receptors	7182	ENSG00000177463	-0.195739	0.505325	-0.276607	0.464062	-0.29245	0.351166
GTATGCGCAGGCTGAAACTACCAT	TRCN0000466071	CCL18	C-C motif chemokine ligand 18	Chemokine ligands	6362	ENSG00000275385	0.103584	0.833677	0.162063	0.849699	0.105296	0.914762
AAAGAAGACGGCCCAATGCCACAC	TRCN0000466074	USP8	ubiquitin specific peptidase 8	Ubiquitin specific peptidases	9101	ENSG00000138592	0.196604	0.829854	0.342132	0.893838	0.0798347	0.979196
TGGGACGTCCGGAACGTATACCTT	TRCN0000466075	LELP1	late cornified envelope like proline rich 1		149018	ENSG00000203784	-0.195881	0.544757	-0.0726449	0.940857	-0.07764	0.911503
GCAAGCCGGTGCCTGTTGCCATTT	TRCN0000466076	PHYHD1	phytanoyl-CoA dioxygenase domain containing 1		254295	ENSG00000175287	-0.0594943	0.87879	0.0781519	0.902457	-0.139326	0.714859
GGCCGACCGACTCGATATCAATGA	TRCN0000466077	ANKRD44	ankyrin repeat domain 44	Ankyrin repeat domain containing|Protein phosphatase 6 regulatory subunits	91526	ENSG00000065413	-0.0426382	0.915222	-0.139575	0.862547	-0.135109	0.817492
TACACCACAGTACGAAATTGCAGA	TRCN0000474029	ANKRD44	ankyrin repeat domain 44	Ankyrin repeat domain containing|Protein phosphatase 6 regulatory subunits	91526	ENSG00000065413	0.0975782	NA	0.446585	0.910556	0.245457	0.944446
GCACGATCACTACGTGCCGCCTTG	TRCN0000466078	NAPB	NSF attachment protein beta		63908	ENSG00000125814	-0.124163	0.760216	-0.138346	0.88839	0.0288118	0.97901
AAATGAGCCCAAAGCTAGAACCAC	TRCN0000466080	DHX30	DExH-box helicase 30	DEAH-box helicases	22907	ENSG00000132153	0.136472	0.851191	-0.0043029	0.996072	0.029024	0.992209
TCAGTCTGCCTCTATCAAAAATCC	TRCN0000466081	ZNF707	zinc finger protein 707	Zinc fingers C2H2-type	286075	ENSG00000181135	0.0595958	0.900979	0.107116	0.8964	-0.00571018	0.995568
CAAGGCTGTACCTCATATTCCTAA	TRCN0000473240	SRPK2	SRSF protein kinase 2		6733	ENSG00000135250	-0.0719712	0.925387	-0.0830309	0.966764	0.0622989	0.971816
AGAACCGGCTTCTTCCAGTACGTG	TRCN0000489739	SRPK2	SRSF protein kinase 2		6733	ENSG00000135250	0.208338	0.783016	0.119912	0.9659	0.103136	0.958389
GGAGGCGATTGTTTTCGAACATGA	TRCN0000466082	SRPK2	SRSF protein kinase 2		6733	ENSG00000135250	0.00730917	0.991197	-0.123504	0.953254	-0.0824414	0.955961
TGGGACTGCATACCAAAGATACGG	TRCN0000489410	SRPK2	SRSF protein kinase 2		6733	ENSG00000135250	-0.0516126	0.954295	-0.136338	0.948851	-0.0342877	0.98795
GTTTGTTCTAAACATTGCGACATC	TRCN0000466083	ZNF578	zinc finger protein 578	Zinc fingers C2H2-type	147660	ENSG00000258405	0.252607	0.739563	0.301021	0.893838	0.288164	0.819848
ACACCCCAAGATTCCCCTAAGATG	TRCN0000466084	TBL1Y	transducin beta like 1 Y-linked	WD repeat domain containing	90665	ENSG00000092377	0.0152564	0.989293	-0.226443	0.935287	-0.365141	0.765888
GTGATCCAATTTTGGTTGGTCGTA	TRCN0000466085	LEP	leptin		3952	ENSG00000174697	0.174775	0.468915	0.284688	0.344775	0.241021	0.424946
GCCGATTTTAATTGGTACCCATAA	TRCN0000466086	KCTD9	potassium channel tetramerization domain containing 9	BTB domain containing	54793	ENSG00000104756	0.142214	0.856343	0.119763	0.96295	-0.00295111	0.998057
AATACGAAGATGTCTTTAAGGCCG	TRCN0000466088	DUSP18	dual specificity phosphatase 18	Atypical dual specificity phosphatases	150290	ENSG00000167065	0.302747	0.186644	0.116155	0.873634	0.212321	0.592242
CTAAATACCTTATACCGGATCCGT	TRCN0000487929	DUSP18	dual specificity phosphatase 18	Atypical dual specificity phosphatases	150290	ENSG00000167065	-0.062205	0.866812	-0.150897	0.853463	-0.0512808	0.946937
CCTCTAGCACCTTGAGACCATTTA	TRCN0000466089	RPL27	ribosomal protein L27	L ribosomal proteins	6155	ENSG00000131469	-0.0495338	0.878826	-0.0360088	0.968392	0.0425352	0.94033
CTCTGTACCGTATTTAGTGGACCC	TRCN0000466090	PLEKHO1	pleckstrin homology domain containing O1	Pleckstrin homology domain containing	51177	ENSG00000023902	-0.0665992	NA	0.0512398	NA	0.362979	0.835375
CTTTGAAACAGTCTTCAAGCCCTT	TRCN0000466091	RHAG	Rh associated glycoprotein	Blood group antigens|CD molecules|Solute carriers	6005	ENSG00000112077	NA	NA	NA	NA	NA	NA
GTCCATGTACCTGACATATATCTT	TRCN0000466092	PHF7	PHD finger protein 7	PHD finger proteins	51533	ENSG00000010318	-0.272197	0.758133	0.0338897	0.992912	-0.0110653	0.995375
ACATGTGCGCCCTATACTCCACAG	TRCN0000466093	KLHL28	kelch like family member 28	Kelch like|BTB domain containing	54813	ENSG00000179454	-0.0643396	NA	-0.00294049	NA	-0.0653401	NA
CGATCTATGGCACGACCATTTGAT	TRCN0000474690	MOB3C	MOB kinase activator 3C	MOB kinase activators	148932	ENSG00000142961	-0.265143	0.298056	-0.202862	0.777379	-0.0918161	0.896598
TATGGGCTTGTCCATTTTTCCTAA	TRCN0000466095	MOB3C	MOB kinase activator 3C	MOB kinase activators	148932	ENSG00000142961	0.0345699	NA	0.0163569	NA	-0.0527489	NA
CGTCATACGCACTTCCTGAATGAG	TRCN0000466096	DEFB118	defensin beta 118	Defensins, beta	117285	ENSG00000131068	-0.191378	0.293888	-0.0611221	0.907584	-0.0822108	0.821941
CCGGCTATGAACAGCAGTTCACGA	TRCN0000466097	KRTAP3-1	keratin associated protein 3-1	Keratin associated proteins	83896	ENSG00000212901	-0.0994088	0.612811	-0.0530948	0.920279	-0.135305	0.663611
AACGCCCTCACGTCCTGCCGCATG	TRCN0000466098	CD3E	CD3e molecule	CD molecules	916	ENSG00000198851	NA	NA	NA	NA	NA	NA
CTGACAACCTTTTAGAATTATCCT	TRCN0000466099	ZNF746	zinc finger protein 746	Zinc fingers C2H2-type	155061	ENSG00000181220	-0.0432401	NA	0.268077	0.946121	0.0687447	NA
TAATCCGTTCGAACCTTCCAGGAA	TRCN0000466101	RLN1	relaxin 1	Endogenous ligands	6013	ENSG00000107018	0.0340788	0.948526	-0.0699952	0.934242	0.0131112	0.985062
GTTTTTCACCACCTTTTCAGCCAT	TRCN0000466102	VPS11	VPS11, CORVET/HOPS core subunit	Ring finger proteins|HOPS complex|CORVET complex	55823	ENSG00000160695	0.250346	0.779059	0.296422	0.923209	0.346873	0.806208
CTGTTCAATTGGTGACTAACCCAC	TRCN0000466104	ZNF280A	zinc finger protein 280A		129025	ENSG00000169548	0.0329723	0.981069	-0.374448	0.90179	0.129172	0.955961
GGCCGCTTCCCAAGGACCGAGACA	TRCN0000481030	RABEPK	Rab9 effector protein with kelch motifs		10244	ENSG00000136933	-0.0831781	0.939877	-0.28577	0.927164	-0.434149	0.751384
CTCCCGGAGGTCCTGAATAGGGAG	TRCN0000466107	RABEPK	Rab9 effector protein with kelch motifs		10244	ENSG00000136933	0.0374884	0.9333	-0.0291085	0.974447	-0.0467694	0.946782
ACGAACCAAAATCACGATTCCGCC	TRCN0000466109	C15orf39	chromosome 15 open reading frame 39		56905	ENSG00000167173	-0.123719	0.629673	-0.0175511	0.984594	-0.0169178	0.981169
TACGGTTTCCTATGTTTGGATCTT	TRCN0000466110	RPS12	ribosomal protein S12	S ribosomal proteins	6206	ENSG00000112306	0.130951	0.840778	-0.055833	0.941068	0.00896566	0.987164
CATGCGACGACGTCGATGGTGAAG	TRCN0000466111	MRPL53	mitochondrial ribosomal protein L53	Mitochondrial ribosomal proteins	116540	ENSG00000204822	-0.0725303	0.847828	0.10327	0.896422	0.0504753	0.94222
AATTATTTCTCCATCCCTTTTCCC	TRCN0000466112	CXCL10	C-X-C motif chemokine ligand 10	Chemokine ligands|Endogenous ligands	3627	ENSG00000169245	0.42573	0.183719	0.350476	0.721619	0.476317	0.251899
TCACGTTAGTCCTCGCGCCAAGAA	TRCN0000466113	M1AP	meiosis 1 associated protein		130951	ENSG00000159374	0.0827476	0.826047	0.0291504	0.974762	-0.141544	0.826702
AATCCTGACGCCTCGTCGTTCAGA	TRCN0000479780	M1AP	meiosis 1 associated protein		130951	ENSG00000159374	0.276906	0.43208	0.116595	0.902262	0.461278	0.173331
TAAAAATCTGTCAAGTTCTATTTC	TRCN0000466114	SERPINB8	serpin family B member 8	Serpin peptidase inhibitors	5271	ENSG00000166401	0.0518747	0.910195	-0.117884	0.890939	-0.157668	0.746102
GAACGAAATCACACAGCTCGGCAC	TRCN0000466115	CD9	CD9 molecule	CD molecules|Tetraspanins	928	ENSG00000010278	0.112917	0.770108	0.0382533	0.964779	0.00735807	0.991467
ATAAACGATTCCCGTCGCCAATCG	TRCN0000466116	EDDM3A	epididymal protein 3A		10876	ENSG00000181562	0.0550275	NA	-0.000204679	NA	NA	NA
TATCCAAATTTAGGAATGGGCCTT	TRCN0000468358	EDDM3A	epididymal protein 3A		10876	ENSG00000181562	-4.52619e-06	0.997816	-0.197334	0.817174	0.0558995	0.951369
CGATGCGGTCTTCATCTAAGGATC	TRCN0000466117	LHX6	LIM homeobox 6	LIM class homeoboxes	26468	ENSG00000106852	0.118923	0.731887	-0.0399431	0.965572	-0.149011	0.837517
CTCGTATCTTTGAGGAGCTTTCAC	TRCN0000466118	SFTPA2	surfactant protein A2	Collectins|C-type lectin domain containing	729238	ENSG00000185303	-0.0340308	0.945453	0.0878943	0.910304	0.0293368	0.976822
TACGCAAGGCCCTAACTCCAGATT	TRCN0000481196	SFTPA2	surfactant protein A2	Collectins|C-type lectin domain containing	729238	ENSG00000185303	-0.0666422	0.834301	-0.0226779	0.973719	-0.0714204	0.88452
TTAAAGCTTTTAAGCAAGACCAGA	TRCN0000466119	NCOR1P1	nuclear receptor corepressor 1 pseudogene 1		149934	ENSG00000240108	0.148818	0.669316	0.00565948	0.993906	-0.150007	0.84013
GGGGCTTTCGGATGATGAGGCCTC	TRCN0000466120	TMEM259	transmembrane protein 259		91304	ENSG00000182087	-0.148124	0.811255	-0.136228	0.948654	0.0415003	0.986534
ATTAGCAACAAATTGGATAACTGA	TRCN0000466121	MEIOB	meiosis specific with OB domains		254528	ENSG00000162039	0.0854398	0.910065	0.11863	0.95868	0.250819	0.790285
TCCATCAGAACATGCTTGACACGA	TRCN0000466122	GGACT	gamma-glutamylamine cyclotransferase		87769	ENSG00000134864	-0.0257136	0.951479	0.000972565	0.99367	-0.201176	0.610201
TCTACCTAGATTGAAATAGACTAA	TRCN0000473823	ANXA4	annexin A4	Annexins	307	ENSG00000196975	-0.00266168	0.996821	-0.112438	0.903649	0.126196	0.819938
CATAATTGTGCCATGTGGCCTGCG	TRCN0000466123	ANXA4	annexin A4	Annexins	307	ENSG00000196975	-0.0144328	0.975363	-0.0925117	0.904182	-0.019408	0.982165
TCGCAAATAGCGTGGATGGAATTA	TRCN0000479190	NUP62	nucleoporin 62	Nucleoporins	23636	ENSG00000213024	-0.0070616	0.9923	-0.0919827	0.963951	-0.0697666	0.964841
CTGTTAGATAGTAGAGCTCACCTC	TRCN0000466124	NUP62	nucleoporin 62	Nucleoporins	23636	ENSG00000213024	-0.145666	0.822584	-0.0912745	0.964561	-0.151266	0.906553
ATCATAAACGAGCGGCCACATTTA	TRCN0000466125	ODF3L1	outer dense fiber of sperm tails 3 like 1		161753	ENSG00000182950	0.129569	0.699702	0.220096	0.646767	-0.0328611	0.972041
TCGAGCCATATCGGGGGAGGTCTG	TRCN0000466126	CNOT7	CCR4-NOT transcription complex subunit 7	CCR4-NOT transcription complex	29883	ENSG00000198791	0.0184123	0.961608	0.0573386	0.932708	-0.0826147	0.877578
AAGTTTTCGTATTTGATCATCATC	TRCN0000475112	CNOT7	CCR4-NOT transcription complex subunit 7	CCR4-NOT transcription complex	29883	ENSG00000198791	0.300959	0.290619	0.27264	0.621363	0.205185	0.683235
ACTCAGTGCCGCACGCAGTATTGT	TRCN0000466127	PRPS2	phosphoribosyl pyrophosphate synthetase 2		5634	ENSG00000101911	0.0369065	0.937977	0.114825	0.891934	0.0943774	0.899466
GTTTTTGGCATTCGTGCCCAATAT	TRCN0000492233	PRPS2	phosphoribosyl pyrophosphate synthetase 2		5634	ENSG00000101911	0.165615	0.83825	0.232605	0.928015	0.357517	0.718471
CGTGGCCTACGACTTCCGGATCCG	TRCN0000471920	PRPS2	phosphoribosyl pyrophosphate synthetase 2		5634	ENSG00000101911	-0.17551	0.542598	-0.267678	0.652714	-0.115873	0.87052
AATCCTTTTAGAGGCTTGGACTGC	TRCN0000475829	PRPS2	phosphoribosyl pyrophosphate synthetase 2		5634	ENSG00000101911	0.400154	0.443897	0.343837	0.84534	0.32634	0.757236
CACTTTTGCAGGAATGATATTATT	TRCN0000474643	PRPS2	phosphoribosyl pyrophosphate synthetase 2		5634	ENSG00000101911	-0.0978408	0.905128	-0.213643	0.927012	-0.0382768	0.98795
TAACATGCCGTAGTGTTTTGCACT	TRCN0000466130	LRIF1	ligand dependent nuclear receptor interacting factor 1		55791	ENSG00000121931	-0.0168511	0.967277	0.083024	0.898532	0.0143315	0.985889
CACTGAACAGATATCTAGGTCAAT	TRCN0000466131	LINC00526	long intergenic non-protein coding RNA 526		147525	ENSG00000264575	-0.0697061	0.928972	-0.0676585	0.969172	-0.076217	0.964977
CTAAGCTAACTACGGCGGTACGCC	TRCN0000492117	MAPK10	mitogen-activated protein kinase 10	Mitogen-activated protein kinases	5602	ENSG00000109339	-0.11092	0.838506	-0.300907	0.798234	-0.441042	0.413463
TGCAGATTATTTTACTCCTCGACG	TRCN0000487812	MAPK10	mitogen-activated protein kinase 10	Mitogen-activated protein kinases	5602	ENSG00000109339	-0.321719	0.632107	-0.0704249	0.976105	-0.246871	0.864314
CCGTCCACGCTTTTACTCGGCAGT	TRCN0000491457	MAPK10	mitogen-activated protein kinase 10	Mitogen-activated protein kinases	5602	ENSG00000109339	-0.0675174	0.913251	-0.326944	0.772048	-0.248616	0.782504
TCATAAGCAAACAGGTTCCCACAG	TRCN0000466133	MAPK10	mitogen-activated protein kinase 10	Mitogen-activated protein kinases	5602	ENSG00000109339	0.309828	0.305013	0.279417	0.678779	0.222482	0.722863
CCCGCTATCGAACCGGGCATATAA	TRCN0000468220	MAPK10	mitogen-activated protein kinase 10	Mitogen-activated protein kinases	5602	ENSG00000109339	-0.101129	0.843674	0.0837187	0.938595	-0.0831345	0.938545
GTGAGTTGCCAATCATGCAATTTA	TRCN0000475774	MAPK10	mitogen-activated protein kinase 10	Mitogen-activated protein kinases	5602	ENSG00000109339	0.0604308	0.924223	0.0902397	0.93686	0.118297	0.90137
ACCAGGGTGAGTGAATCTAAGAAG	TRCN0000488648	MAPK10	mitogen-activated protein kinase 10	Mitogen-activated protein kinases	5602	ENSG00000109339	0.0388107	NA	0.0398451	NA	NA	NA
AGACAGTAAACCCGGGATGCGCAC	TRCN0000469353	HIST1H2AC	histone cluster 1 H2A family member c	Histones	8334	ENSG00000180573	-0.0894032	0.798589	-0.181329	0.707355	-0.0420624	0.944453
ATCGATAACCATCGCTTACCTGGA	TRCN0000466135	HIST1H2AC	histone cluster 1 H2A family member c	Histones	8334	ENSG00000180573	0.0816922	0.840421	0.0880599	0.916774	0.0606839	0.938922
ACATCCAACAATACTGAGCCGGCG	TRCN0000466136	KLK11	kallikrein related peptidase 11	Kallikreins|Serine proteases	11012	ENSG00000167757	0.00735191	0.978851	-0.0520559	0.933061	-0.0194145	0.974268
CCTGCTTCTCAGTGTTAGTCTTGC	TRCN0000466137	BANK1	B cell scaffold protein with ankyrin repeats 1	Ankyrin repeat domain containing	55024	ENSG00000153064	0.0312648	NA	-0.00438629	NA	0.0107076	NA
GACCATCATCATCTAGAATTTCAG	TRCN0000469466	UBAC2	UBA domain containing 2	Rhomboid family	337867	ENSG00000134882	0.137148	0.538821	0.101742	0.863771	-0.0187743	0.979581
GGGCTTTAAACGAACATAAGAATC	TRCN0000466138	UBAC2	UBA domain containing 2	Rhomboid family	337867	ENSG00000134882	-0.0540189	0.84207	-0.0484193	0.939142	-0.0985232	0.74548
ATCTCCTCCTTAGATACATTTTTG	TRCN0000466139	CLCN6	chloride voltage-gated channel 6	Chloride voltage-gated channels	1185	ENSG00000011021	0.0734684	0.952889	0.00194316	0.999924	0.183964	0.936119
TACAAGTCCACCTCAGCGCGCCTC	TRCN0000489438	LYN	LYN proto-oncogene, Src family tyrosine kinase	SH2 domain containing|Src family tyrosine kinases	4067	ENSG00000254087	-0.100067	0.913611	-0.0887579	0.971728	0.0660032	0.976311
TAAATGCTCCGCACTTCGTAATCC	TRCN0000466140	LYN	LYN proto-oncogene, Src family tyrosine kinase	SH2 domain containing|Src family tyrosine kinases	4067	ENSG00000254087	-0.0162135	0.988216	0.18675	0.949781	-0.128225	0.948943
CTACGAAATGCTTCACGGTCCCTA	TRCN0000469344	LYN	LYN proto-oncogene, Src family tyrosine kinase	SH2 domain containing|Src family tyrosine kinases	4067	ENSG00000254087	-0.191103	0.756624	-0.00189985	0.996868	-0.0605679	0.976082
GTCCTACCCTCCAATGTTAAGAAC	TRCN0000471646	LYN	LYN proto-oncogene, Src family tyrosine kinase	SH2 domain containing|Src family tyrosine kinases	4067	ENSG00000254087	-0.0179531	0.986191	0.129102	0.96295	0.144105	0.943076
GTACTTAGTCCGCCGTTTAACTCA	TRCN0000466141	CHRNA9	cholinergic receptor nicotinic alpha 9 subunit	Cholinergic receptors nicotinic subunits	55584	ENSG00000174343	0.0945979	0.814556	0.209217	0.771044	0.0527675	0.954692
ACCGAAGAATAATCGTTTGCGATC	TRCN0000466142	UBL4A	ubiquitin like 4A		8266	ENSG00000102178	0.00384934	NA	NA	NA	-0.0306386	NA
CAACACATGGGGAAGATCTGATTA	TRCN0000478701	MTCH1	mitochondrial carrier 1	Solute carriers	23787	ENSG00000137409	-0.0420505	0.907845	-0.0360275	0.965572	0.0634749	0.920771
TACGATCATACATTACCCGACAGA	TRCN0000466143	MTCH1	mitochondrial carrier 1	Solute carriers	23787	ENSG00000137409	0.0105753	0.981572	0.00159984	0.993738	-0.0133616	0.988724
ACACTACGCCCTCATGGCACCAGC	TRCN0000467683	CCNG1	cyclin G1	Cyclins	900	ENSG00000113328	0.206806	0.582626	0.0673392	0.947897	0.250066	0.637734
ATGAAGCCGCACGTCCGTAGTTCG	TRCN0000466144	CCNG1	cyclin G1	Cyclins	900	ENSG00000113328	0.146301	0.853058	0.195226	0.932053	0.184102	0.883921
GTACACCCTACCGTCGCATACGAC	TRCN0000466145	ARSJ	arylsulfatase family member J	Sulfatases	79642	ENSG00000180801	-0.147437	0.62658	0.0788059	0.897389	0.124544	0.761549
CCGCATGATGTAAAGGCAATGCTC	TRCN0000466146	C21orf91	chromosome 21 open reading frame 91		54149	ENSG00000154642	-0.0906625	0.750636	0.00782388	0.986262	-0.0266385	0.967744
AATTGTTGAGCTTCTATCTGGTTC	TRCN0000466147	C8orf31	chromosome 8 open reading frame 31 (putative)		286122	ENSG00000177335	0.243113	0.537013	0.347356	0.555738	0.26344	0.644238
AGCTGGCCTTCGTTTGCCAGACCG	TRCN0000466148	GPATCH11	G-patch domain containing 11	G-patch domain containing	253635	ENSG00000152133	0.0758831	0.871904	0.118365	0.895583	0.0706255	0.933138
ACATCACGTACCTGTTAGATCTTT	TRCN0000466149	HOPX	HOP homeobox	PRD class homeoboxes and pseudogenes	84525	ENSG00000171476	0.0101443	0.978281	0.0660608	0.914689	-0.0702553	0.909274
GGCCCGAACCACCTAATGTGCATA	TRCN0000489354	UMPS	uridine monophosphate synthetase		7372	ENSG00000114491	-0.108902	0.726097	-0.0599394	0.939318	-0.177573	0.708756
CATGCCGGTCACCAGTGATATTTG	TRCN0000489048	UMPS	uridine monophosphate synthetase		7372	ENSG00000114491	-0.0866117	0.820277	-0.00740543	0.996999	-0.0543428	0.948822
GTAATATAACCAAGGGGTTTTTTC	TRCN0000466150	UMPS	uridine monophosphate synthetase		7372	ENSG00000114491	0.357288	0.308613	0.181113	0.872085	0.261066	0.680367
GATGTAGCGCAATTCGGCTTTTCA	TRCN0000466151	CHMP4C	charged multivesicular body protein 4C	Charged multivesicular body proteins|ESCRT-III	92421	ENSG00000164695	-0.0129309	0.98102	0.118283	0.888661	0.21293	0.676574
CTTCTATGCACGCCGCGCGACCAG	TRCN0000466153	EPM2A	EPM2A, laforin glucan phosphatase	Atypical dual specificity phosphatases	7957	ENSG00000112425	-0.03682	0.934615	0.103776	0.875611	0.130659	0.775546
AGAGTTTACACGCATGCCCGAGAG	TRCN0000466154	CEP72	centrosomal protein 72		55722	ENSG00000112877	-0.12106	0.865549	-0.0829858	0.967014	-0.192731	0.876751
CTGGTCCCGATACCGCACTCTGTA	TRCN0000478608	CEP72	centrosomal protein 72		55722	ENSG00000112877	-0.0938552	0.841516	0.0447939	0.966268	-0.112776	0.891972
GTACTTATTGAGCAGGATATCGAA	TRCN0000466155	MIR99AHG	mir-99a-let-7c cluster host gene	Long non-coding RNAs (published)	388815	ENSG00000215386	0.10016	0.929909	0.152642	0.96295	0.0880916	0.975759
TTATCTCGGATCAATCTTAACGGT	TRCN0000466156	NTS	neurotensin	Endogenous ligands	4922	ENSG00000133636	0.193843	0.535932	0.107519	0.892026	0.176209	0.739774
AACATCTTCCGGACGCACAACCGT	TRCN0000466157	HLA-C	major histocompatibility complex, class I, C	Histocompatibility complex|C1-set domain containing	3107	ENSG00000204525	0.0799138	0.881354	0.119013	0.907025	0.226578	0.702193
ACACCGAACACAATGTCGCAAGTA	TRCN0000469854	HLA-C	major histocompatibility complex, class I, C	Histocompatibility complex|C1-set domain containing	3107	ENSG00000204525	-0.0379838	0.94348	-0.200987	0.8463	-0.25538	0.596599
GGTTTAAAAAATATATTGATCTAG	TRCN0000480126	HLA-C	major histocompatibility complex, class I, C	Histocompatibility complex|C1-set domain containing	3107	ENSG00000204525	0.242848	0.310406	0.224901	0.614873	0.194018	0.650506
AAACTCGCGCAGACGCCTACATTT	TRCN0000466158	SMYD4	SET and MYND domain containing 4	Zinc fingers MYND-type|SET domain containing	114826	ENSG00000186532	0.210917	0.743216	-0.043672	0.984319	0.150011	0.926944
CAACCTATACCTGGAGATCATGTT	TRCN0000466159	MTMR12	myotubularin related protein 12	Myotubularins	54545	ENSG00000150712	-0.10965	0.789792	0.0306639	0.976237	-0.0199132	0.984871
TGTTACAGCTCGACCGTCGACATC	TRCN0000466160	NPPB	natriuretic peptide B	Endogenous ligands	4879	ENSG00000120937	-0.0960704	0.676543	-0.0761832	0.903147	0.0338212	0.954181
TTATGTGTTGTAGCTGGCACATAC	TRCN0000466161	FASN	fatty acid synthase	Short chain dehydrogenase/reductase superfamily|Seven-beta-strand methyltransferase motif containing	2194	ENSG00000169710	0.00610518	0.990594	-0.0375749	0.978682	-0.0343094	0.97926
AACAGACCGCCGCTGATACATACG	TRCN0000466906	MAST1	microtubule associated serine/threonine kinase 1	PDZ domain containing|AGC family kinases	22983	ENSG00000105613	-0.0954555	NA	-0.0855486	NA	-0.0474224	NA
TCCGGCTGGTTATAACCAGTAAGC	TRCN0000466163	MAST1	microtubule associated serine/threonine kinase 1	PDZ domain containing|AGC family kinases	22983	ENSG00000105613	-0.0872563	NA	0.00559746	NA	0.215702	0.932249
CAGGCGTCCACGCTTTTATACCAT	TRCN0000466165	VPS33A	VPS33A, CORVET/HOPS core subunit	HOPS complex|CORVET complex	65082	ENSG00000139719	0.00985516	0.9938	0.221636	0.941332	0.0704982	0.979124
ACATTCGACGCAAGGCGCCTAGAT	TRCN0000468779	EIF2B2	eukaryotic translation initiation factor 2B subunit beta		8892	ENSG00000119718	0.00533463	0.991275	-0.039715	0.974401	-0.0720536	0.933023
GCTCGGTCTAGCCGAATCGCGGCT	TRCN0000466166	EIF2B2	eukaryotic translation initiation factor 2B subunit beta		8892	ENSG00000119718	0.00639172	0.985382	-0.00700679	0.995777	0.0251354	0.976139
CACCCGTGCCAGAATGCAGCTCAC	TRCN0000466167	PITPNC1	phosphatidylinositol transfer protein cytoplasmic 1	Phosphatidylinositol transfer proteins	26207	ENSG00000154217	-0.372324	0.5593	-0.0306569	0.989721	-0.130762	0.949786
ATCAAATCTGACTGTCACGGCAGC	TRCN0000466169	PIAS1	protein inhibitor of activated STAT 1	Zinc fingers MIZ-type	8554	ENSG00000033800	0.325266	0.225967	0.182723	0.807834	0.268611	0.516271
TGGCAGACGGTATGTAAAAATCTA	TRCN0000466170	SLC24A5	solute carrier family 24 member 5	Solute carriers	283652	ENSG00000188467	-0.142532	0.580173	-0.238852	0.561018	-0.0994094	0.844361
CGATGTGCTGGCTCAGCATAACTC	TRCN0000466171	CASQ2	calsequestrin 2	Protein disulfide isomerases	845	ENSG00000118729	-0.157519	0.913611	0.199676	0.959288	-0.0380125	0.992648
AAATTCCCTCGGTGTATTCAGTAG	TRCN0000466172	NOP16	NOP16 nucleolar protein		51491	ENSG00000048162	0.530842	0.511446	-0.0270379	NA	-0.0203504	NA
ACAAACAAATTCTAATTGACGTTT	TRCN0000468027	NOP16	NOP16 nucleolar protein		51491	ENSG00000048162	-0.072518	0.826157	-0.0335698	0.965572	0.0459538	0.952143
AGTTAAATACTTTACTAGTAGTTC	TRCN0000466173	STARD8	StAR related lipid transfer domain containing 8	Rho GTPase activating proteins|StAR related lipid transfer domain containing	9754	ENSG00000130052	-0.0926225	0.941956	-0.113178	0.971795	-0.312071	0.88802
ACTAGACGAAAAATGAGGCATGGA	TRCN0000488297	EEF2KMT	eukaryotic elongation factor 2 lysine methyltransferase	Seven-beta-strand methyltransferase motif containing	196483	ENSG00000118894	0.0384633	0.92248	0.120204	0.851686	0.0713332	0.923883
CCGTTCATGATGGCGTAAGTACGC	TRCN0000491961	EEF2KMT	eukaryotic elongation factor 2 lysine methyltransferase	Seven-beta-strand methyltransferase motif containing	196483	ENSG00000118894	-0.104665	0.75058	0.0125758	0.984955	-0.142213	0.799392
TACCTGCGCGCCTAACAATCATGA	TRCN0000488399	EEF2KMT	eukaryotic elongation factor 2 lysine methyltransferase	Seven-beta-strand methyltransferase motif containing	196483	ENSG00000118894	-0.0732312	0.832704	-0.0797328	0.912437	-0.109145	0.845879
GGAGAGATGACCTTCCATCATCTG	TRCN0000466174	EEF2KMT	eukaryotic elongation factor 2 lysine methyltransferase	Seven-beta-strand methyltransferase motif containing	196483	ENSG00000118894	-0.0611	0.868846	-0.103991	0.892084	-0.0589514	0.937617
CGTTAATCCACCCTCACTAATGAT	TRCN0000488038	NEK6	NIMA related kinase 6		10783	ENSG00000119408	-0.040034	0.954482	0.230155	0.768951	0.110406	0.895015
TCACTTTACTTCTAACTGCTTCAT	TRCN0000488514	NEK6	NIMA related kinase 6		10783	ENSG00000119408	-0.0336515	0.965952	0.219484	0.79637	-0.11423	0.942749
CACCCATTAGTAAGCCAGTTGCCC	TRCN0000488684	NEK6	NIMA related kinase 6		10783	ENSG00000119408	0.129693	0.787889	0.0688856	0.973216	0.021414	0.992648
GTCACCATGCAAATGTTCTAGCCT	TRCN0000474711	NEK6	NIMA related kinase 6		10783	ENSG00000119408	-0.135813	0.836235	0.183945	0.928973	-0.0625712	0.971492
GTCCTATTGGTAATCCGACCGCCA	TRCN0000466175	NEK6	NIMA related kinase 6		10783	ENSG00000119408	0.0468095	0.962613	0.170947	0.946121	0.43711	0.55321
TCATGGCTGACTCCCTAGAACATG	TRCN0000466176	HOXA5	homeobox A5	HOXL subclass homeoboxes	3202	ENSG00000106004	-0.159904	0.718419	-0.0633189	0.960043	-0.0242856	0.982824
ATCTAAACCGTCTGAATTAATACA	TRCN0000466177	CEP19	centrosomal protein 19		84984	ENSG00000174007	0.194166	0.545075	0.161925	0.833503	0.286121	0.483859
TCCGCGATAAGGTCCGCCCATACC	TRCN0000466725	CD99L2	CD99 molecule like 2		83692	ENSG00000102181	-0.00497115	NA	NA	NA	-0.0237828	NA
TACAGGTATGTTATAAATGTCCAC	TRCN0000466178	CD99L2	CD99 molecule like 2		83692	ENSG00000102181	-0.0590964	0.889122	-0.0343076	0.971759	-0.0509263	0.951616
GTCCGCCGTGTGTGCGCATTAACA	TRCN0000466180	SCGB1D1	secretoglobin family 1D member 1	Secretoglobins	10648	ENSG00000168515	0.0459599	0.902165	0.0587661	0.929126	0.0959525	0.870367
AATTAGTGTGTTATCATTAAAGGT	TRCN0000466181	RPTOR	regulatory associated protein of MTOR complex 1	WD repeat domain containing|MTOR complex 1|Armadillo-like helical domain containing	57521	ENSG00000141564	0.225483	0.739563	0.371492	0.798914	0.355009	0.729357
TTTTAGATCCCGGACCTCACGACG	TRCN0000466182	LSM3	LSM3 homolog, U6 small nuclear RNA and mRNA degradation associated	LSm proteins	27258	ENSG00000170860	0.191359	0.610527	0.192809	0.819539	0.235788	0.707341
TGACACACAATCGTTTTGTGCCAA	TRCN0000466183	S100A4	S100 calcium binding protein A4	S100 calcium binding proteins|EF-hand domain containing	6275	ENSG00000196154	-0.251007	0.306649	-0.122476	0.872975	-0.278842	0.478494
CGATGGCCATGGACCAACTATTAC	TRCN0000466184	C5orf60	chromosome 5 open reading frame 60		285679	ENSG00000204661	NA	NA	0.0106756	NA	0.0148016	NA
TTCACTGGCTGTTGGCTATTATTA	TRCN0000466185	C4orf33	chromosome 4 open reading frame 33		132321	ENSG00000151470	0.02504	0.959443	0.234219	0.639692	0.181144	0.703152
GTGGGGAATAAAGAACGGCAATAT	TRCN0000466186	SSBP3	single stranded DNA binding protein 3		23648	ENSG00000157216	0.13216	0.651213	0.123668	0.855922	0.067484	0.918252
ACATGGTAAGTTCTGCATGAAACC	TRCN0000474142	SSBP3	single stranded DNA binding protein 3		23648	ENSG00000157216	0.050906	0.887387	0.100239	0.85754	0.100064	0.831198
CCCAGTATCTGGCGTCAGATTGTC	TRCN0000466188	CCDC47	coiled-coil domain containing 47		57003	ENSG00000108588	-0.170824	0.61801	-0.199127	0.785075	0.0282403	0.974979
CAATCCGTACGGGATTATAAGATA	TRCN0000466189	SPCS1	signal peptidase complex subunit 1		28972	ENSG00000114902	-0.129575	0.68341	0.0130448	0.982262	-0.186639	0.594064
CGGCAACGCCTTATGATCCTCGCA	TRCN0000466190	NDUFB3	NADH:ubiquinone oxidoreductase subunit B3	NADH:ubiquinone oxidoreductase supernumerary subunits	4709	ENSG00000119013	-0.264054	0.123115	-0.13042	0.787124	-0.19169	0.509538
GATACAAGTAGCGGCCGGCTATGC	TRCN0000466191	HMGN3	high mobility group nucleosomal binding domain 3	Canonical high mobility group	9324	ENSG00000118418	0.00818015	0.985621	-0.0140674	0.991422	0.0434057	0.961214
AGTCTGTTCGCAACAGTATGGATG	TRCN0000488533	PAPSS2	3'-phosphoadenosine 5'-phosphosulfate synthase 2		9060	ENSG00000198682	-0.0617621	0.954813	-0.0951504	0.973216	-0.0615998	0.981193
GTGGCAGCCCGATGATTGATGACA	TRCN0000488360	PAPSS2	3'-phosphoadenosine 5'-phosphosulfate synthase 2		9060	ENSG00000198682	-0.309689	0.635585	-0.0199983	0.992957	0.0423301	0.98795
TCGATCCAGTTAACCTTACAAGCG	TRCN0000466192	PAPSS2	3'-phosphoadenosine 5'-phosphosulfate synthase 2		9060	ENSG00000198682	-0.239409	0.708484	-0.255681	0.893838	-0.419	0.626344
TTTCGGACACACCTGAGTGTAAGC	TRCN0000466193	MND1	meiotic nuclear divisions 1		84057	ENSG00000121211	0.121153	0.723793	0.0514287	0.950927	0.0632782	0.932371
TCCTAGGGACCACCATATTTTTAG	TRCN0000468959	LRRC28	leucine rich repeat containing 28		123355	ENSG00000168904	0.160874	0.553494	0.109728	0.840138	0.152337	0.67554
TCCCGTCAACCGGTGAGCTGGTCA	TRCN0000466194	LRRC28	leucine rich repeat containing 28		123355	ENSG00000168904	0.00497906	0.992003	-0.0130217	0.993601	0.106346	0.898332
TACCCTATTAGCATTCAATTGTTA	TRCN0000466195	COX7B2	cytochrome c oxidase subunit 7B2	Mitochondrial complex IV: cytochrome c oxidase subunits	170712	ENSG00000170516	-0.116804	0.796569	-0.22555	0.800244	-0.168104	0.792252
GGCTCTGGCGATGTGCTTTCTCCA	TRCN0000466196	YIPF4	Yip1 domain family member 4	Yip1 domain containing	84272	ENSG00000119820	-0.0131903	0.973333	-0.00151385	0.991365	-0.104046	0.753707
ACCAGTCTCTATTACCGGTCTAAT	TRCN0000489156	NME5	NME/NM23 family member 5	NME/NM23 family	8382	ENSG00000112981	0.0366434	0.951171	-0.126329	0.909673	-0.0390839	0.972167
AATACTGGCACCGAGAATTCATAA	TRCN0000491685	NME5	NME/NM23 family member 5	NME/NM23 family	8382	ENSG00000112981	-0.0297493	0.97544	-0.0956497	0.966444	0.160865	0.912527
GTTTCGTTATTGTGGGATGTGTTC	TRCN0000466197	NME5	NME/NM23 family member 5	NME/NM23 family	8382	ENSG00000112981	0.0993289	NA	-0.0284208	NA	0.0719403	NA
GGTGCGGTTGAAACCACCAGGACC	TRCN0000466198	BHMT	betaine--homocysteine S-methyltransferase		635	ENSG00000145692	-0.0147041	0.990716	0.120988	0.968489	0.00197517	0.999783
TACCAGCGCGTTCGAGTTAACAGT	TRCN0000466200	ZP2	zona pellucida glycoprotein 2	Zona pellucida glycoproteins	7783	ENSG00000103310	-0.0462754	0.905123	-0.196711	0.605638	-0.201981	0.628516
CGGCCATCGAGTAAATGCGACCAA	TRCN0000473172	KDELR3	KDEL endoplasmic reticulum protein retention receptor 3		11015	ENSG00000100196	-0.230742	0.457483	-0.207788	0.738494	-0.259221	0.582186
GCCCTATTCCCGCCCCAGGGAGTT	TRCN0000466201	KDELR3	KDEL endoplasmic reticulum protein retention receptor 3		11015	ENSG00000100196	0.084437	0.817357	-0.030787	0.974177	0.259887	0.443736
GCGCCAGCAGAACTCCAGTGTGGT	TRCN0000466202	ITIH3	inter-alpha-trypsin inhibitor heavy chain 3		3699	ENSG00000162267	0.0589278	0.886898	0.0507474	0.947813	-0.0166511	0.985359
AGATCGAGCGTACGCGCATGTCTC	TRCN0000466203	ATP6V0A4	ATPase H+ transporting V0 subunit a4	V-type ATPases	50617	ENSG00000105929	0.273069	0.736595	0.185401	0.953254	0.0303793	0.992648
GGCGGATGTTTAGCACCTCACCTT	TRCN0000481441	ATP6V0A4	ATPase H+ transporting V0 subunit a4	V-type ATPases	50617	ENSG00000105929	NA	NA	NA	NA	NA	NA
CTTAAACAGTACTTCGGATAGCAA	TRCN0000466204	CD24	CD24 molecule	CD molecules	100133941	ENSG00000272398	-0.282637	0.57186	-0.0839497	0.966633	-0.0823605	0.955961
TTTTTTTAATATGCCATAACCCTT	TRCN0000466205	PLSCR4	phospholipid scramblase 4	Phospholipid scramblases	57088	ENSG00000114698	0.520197	0.0461881	0.453063	0.300776	0.606805	0.0288666
CTACACTCGTTGTGTCCGATGGTT	TRCN0000466206	SLC12A7	solute carrier family 12 member 7	Solute carriers	10723	ENSG00000113504	-0.162722	0.655391	-0.0840249	0.935542	-0.0702851	0.930556
CTGCAGCACCGGACATATTGTTTC	TRCN0000466207	GLRX2	glutaredoxin 2	Glutaredoxin domain containing	51022	ENSG00000023572	-0.1203	0.546821	-0.00699888	0.994911	-0.0331868	0.945391
CGCTTCAATAAGAATATAATTACG	TRCN0000466211	VPS52	VPS52, GARP complex subunit	Endosome-associated recycling protein (EARP) complex|Golgi associated retrograde protein (GARP) complex	6293	ENSG00000223501	NA	NA	NA	NA	0.397314	0.886302
AGTGAGTCAATGAGACGGGGGCCC	TRCN0000466212	PRAC1	PRAC1 small nuclear protein		84366	ENSG00000159182	-0.0174416	0.961495	-0.0127882	0.988325	-0.0696686	0.891961
TTGAAGAAATGTACTAGGCACCAT	TRCN0000466213	TMEM71	transmembrane protein 71		137835	ENSG00000165071	0.0977896	0.726788	0.00352666	0.992576	0.190796	0.551855
GCTCTTAGGGGTGCTCGAGCATGC	TRCN0000466215	ATAD2	ATPase family, AAA domain containing 2	AAA ATPases|Bromodomain containing	29028	ENSG00000156802	0.185158	0.688277	0.231858	0.773409	0.313274	0.592291
TTTGGCACTTAACCACGTTTAGTC	TRCN0000466216	P2RY11	purinergic receptor P2Y11	P2Y receptors	5032	ENSG00000244165	0.0800605	0.841821	0.149261	0.815159	0.135288	0.763679
ATCATTGACACGGGTTCCCTAGTT	TRCN0000488647	P2RY11	purinergic receptor P2Y11	P2Y receptors	5032	ENSG00000244165	0.235126	0.299548	0.165556	0.754392	0.24529	0.453524
GAATTAGTACTTTCTCCACGCAGC	TRCN0000466217	TSR2	TSR2, ribosome maturation factor		90121	ENSG00000158526	0.110594	0.782001	0.337589	0.356042	0.198033	0.689983
TTCTTAGGTGGAGGGTGAGCGTAC	TRCN0000466218	NECAB1	N-terminal EF-hand calcium binding protein 1	N-terminal EF-hand calcium binding proteins|EF-hand domain containing	64168	ENSG00000123119	0.0851571	0.845704	0.170727	0.834492	0.0803485	0.915286
CCTTTAATGATATTGGAATTCTGT	TRCN0000477239	NECAB1	N-terminal EF-hand calcium binding protein 1	N-terminal EF-hand calcium binding proteins|EF-hand domain containing	64168	ENSG00000123119	-0.00280349	0.996312	0.119241	0.871692	4.64146e-05	0.997113
GCATTGATCAACGAAACTATTGGT	TRCN0000466219	FAM198B	family with sequence similarity 198 member B		51313	ENSG00000164125	0.0812382	0.730888	0.144385	0.732084	0.135677	0.706529
GCACCCTCTATACCCCATTCGTTC	TRCN0000466221	TMEM56	transmembrane protein 56	TLC domain containing	148534	ENSG00000152078	0.0514259	0.867579	0.110936	0.833788	0.0710832	0.907126
TGGTCTTCTAATGAAACATTTGTA	TRCN0000466222	KIRREL2	kirre like nephrin family adhesion molecule 2	C2-set domain containing|I-set domain containing|Immunoglobulin like domain containing	84063	ENSG00000126259	-0.0394385	0.922428	-0.113226	0.895727	0.0401022	0.959705
TTCTTGGTCAAGTATAGATATGCC	TRCN0000472349	MAP3K12	mitogen-activated protein kinase kinase kinase 12	Mitogen-activated protein kinase kinase kinases	7786	ENSG00000139625	0.267486	0.487488	0.087553	0.966633	0.194555	0.854701
CTTACGAAATCTTTTTAATGGCCG	TRCN0000491519	MAP3K12	mitogen-activated protein kinase kinase kinase 12	Mitogen-activated protein kinase kinase kinases	7786	ENSG00000139625	-0.0500002	0.924751	0.0896092	0.929386	0.0763272	0.922901
ACCATACTTGTCTATGTCGTCGGC	TRCN0000466223	MAP3K12	mitogen-activated protein kinase kinase kinase 12	Mitogen-activated protein kinase kinase kinases	7786	ENSG00000139625	-0.0802808	0.840365	-0.117714	0.889881	-0.0289323	0.978921
ATCAACAAAAATTCCGAGTTCCGG	TRCN0000466224	BOC	BOC cell adhesion associated, oncogene regulated	Fibronectin type III domain containing|I-set domain containing|Immunoglobulin like domain containing|Ig-like cell adhesion molecule family	91653	ENSG00000144857	0.0358001	0.932806	0.152553	0.82717	0.172468	0.722667
ATCAGTCGAGCGAATATAACCAGT	TRCN0000466226	ATP6V1B2	ATPase H+ transporting V1 subunit B2	V-type ATPases	526	ENSG00000147416	0.0934065	0.907983	0.0653776	0.973216	0.115734	0.943257
ATAAGACTCTCGACTATAATACGG	TRCN0000473950	ATP6V1B2	ATPase H+ transporting V1 subunit B2	V-type ATPases	526	ENSG00000147416	0.0690823	0.895602	0.0490158	0.961246	-0.00797684	0.994244
CGGCTAGGGATCGGCTCCGTGCTA	TRCN0000471033	RBM42	RNA binding motif protein 42	RNA binding motif containing	79171	ENSG00000126254	-0.450519	0.133841	-0.298604	0.670227	-0.50215	0.205429
AACGACGGACCCCAGCCTTACCGC	TRCN0000466227	RBM42	RNA binding motif protein 42	RNA binding motif containing	79171	ENSG00000126254	-0.066331	0.935537	-0.127268	0.95513	-0.0386717	0.986534
TCAGCCACCGAGATCGGTCCCGTA	TRCN0000489036	HTR1D	5-hydroxytryptamine receptor 1D	5-hydroxytryptamine receptors, G protein-coupled	3352	ENSG00000179546	-0.0288193	0.934281	-0.081139	0.892653	-0.0985771	0.814247
TGCATCCGGATCGTACGTGCTCTC	TRCN0000487810	HTR1D	5-hydroxytryptamine receptor 1D	5-hydroxytryptamine receptors, G protein-coupled	3352	ENSG00000179546	-0.207002	0.294267	-0.341254	0.0405757	-0.207402	0.417331
AGCATGCCTTTTACGACAAGATGG	TRCN0000466228	HTR1D	5-hydroxytryptamine receptor 1D	5-hydroxytryptamine receptors, G protein-coupled	3352	ENSG00000179546	-0.139692	0.701148	-0.369378	0.222891	-0.243863	0.51947
TTTTAGATGAATATAGTTATATCC	TRCN0000466229	TTC33	tetratricopeptide repeat domain 33	Tetratricopeptide repeat domain containing	23548	ENSG00000113638	0.311892	0.29167	0.189435	0.806297	0.39564	0.256135
ATAACCAATGATTTCCGACAGATT	TRCN0000466230	SRSF12	serine and arginine rich splicing factor 12	RNA binding motif containing|Serine and arginine rich splicing factors	135295	ENSG00000154548	-0.109817	0.794838	-0.25055	0.689631	-0.231281	0.677676
GACTTACACAGACTGATTATAATA	TRCN0000466231	ST6GALNAC5	ST6 N-acetylgalactosaminide alpha-2,6-sialyltransferase 5	Sialyltransferases	81849	ENSG00000117069	0.0335159	0.950915	-0.0189319	0.987794	0.0820934	0.912309
TCAATGTACTGGCAAAGTAGGCAC	TRCN0000466232	FKBP6	FK506 binding protein 6	FKBP prolyl isomerases	8468	ENSG00000077800	-0.0611196	0.905211	-0.106434	0.899123	0.105442	0.886848
TACTGGCTAAGTCGATTACAATAA	TRCN0000466233	CPLX4	complexin 4		339302	ENSG00000166569	0.0188264	0.963488	-0.0137253	0.98939	0.0304832	0.971529
TTTAGGGTCGCCAATCTAACCCTT	TRCN0000488854	CALCA	calcitonin related polypeptide alpha	Endogenous ligands	796	ENSG00000110680	0.116886	0.733247	0.028653	0.968167	0.104277	0.867678
ATCTCTCTCTTAATCTTGACACCA	TRCN0000466234	CALCA	calcitonin related polypeptide alpha	Endogenous ligands	796	ENSG00000110680	0.250912	0.444177	0.345969	0.395781	0.180336	0.749536
TGCCGGTGGAACGACGATTACGGG	TRCN0000466235	SCLT1	sodium channel and clathrin linker 1		132320	ENSG00000151466	-0.256859	0.205424	-0.195312	0.62869	-0.187009	0.654528
ACTTAGTCACAGATACCTCCGCAC	TRCN0000466236	HMCES	5-hydroxymethylcytosine binding, ES cell specific		56941	ENSG00000183624	0.151263	0.585515	0.151845	0.8166	0.143237	0.717566
GCTACTACTCTTGACTGACGAACT	TRCN0000471256	HMCES	5-hydroxymethylcytosine binding, ES cell specific		56941	ENSG00000183624	0.0335527	0.933816	0.0790246	0.918279	-0.0213932	0.980645
TGTGTTGAGTGGGGTGATATCGAA	TRCN0000466237	GOLM1	golgi membrane protein 1		51280	ENSG00000135052	-0.100696	0.941998	0.424383	0.921139	-0.327079	0.845776
GTTTAAAGCTGATCCAAGAAACAT	TRCN0000466238	CNOT9	CCR4-NOT transcription complex subunit 9	CCR4-NOT transcription complex|Armadillo-like helical domain containing	9125	ENSG00000144580	0.000950546	NA	0.0543741	NA	0.654327	0.664827
GCACCCCATCATGTAGGAATTACG	TRCN0000466239	GRIA2	glutamate ionotropic receptor AMPA type subunit 2	Glutamate ionotropic receptor AMPA type subunits	2891	ENSG00000120251	0.076521	0.952889	0.452824	0.799136	-0.437637	0.782504
CGATCTCTAGCACTTTTATGGGCT	TRCN0000466241	LINC00550	long intergenic non-protein coding RNA 550		338862	ENSG00000281778	-0.105204	0.776463	-0.192975	0.744104	-0.0461248	0.951739
AATTGTACGTGGGCCGATGGTCAC	TRCN0000472200	SMAGP	small cell adhesion glycoprotein		57228	ENSG00000170545	0.199031	0.601745	0.163616	0.860773	0.218303	0.713919
TAGCCGCAGAATAACATTGTTGTC	TRCN0000466242	SMAGP	small cell adhesion glycoprotein		57228	ENSG00000170545	-0.157846	0.488899	-0.10749	0.849668	-0.106553	0.79567
TGTTCACGTTGGCAGACCGGAAGA	TRCN0000466243	BRPF3	bromodomain and PHD finger containing 3	PHD finger proteins|PWWP domain containing|Bromodomain containing	27154	ENSG00000096070	-0.0834771	0.855558	-0.207043	0.843924	-0.211188	0.741323
CTGTGTTCAAGGTTCAGCAGTGAT	TRCN0000466244	INTU	inturned planar cell polarity protein	PDZ domain containing|Ciliogenesis and planar polarity effector complex	27152	ENSG00000164066	0.088932	0.736235	0.0668435	0.906538	0.0854911	0.843565
ACCATGAACTGAAAGCTATTATTC	TRCN0000476034	INTU	inturned planar cell polarity protein	PDZ domain containing|Ciliogenesis and planar polarity effector complex	27152	ENSG00000164066	-0.269334	0.747401	-0.203278	0.946121	0.268802	0.862801
CGTGGCCCCGGAGCGGCTAATTGG	TRCN0000466245	NEUROG3	neurogenin 3	Basic helix-loop-helix proteins	50674	ENSG00000122859	-0.436875	0.00211282	-0.456498	0.108691	-0.269227	0.480519
TACACAGCTGCCGTAAATGCAGAT	TRCN0000466246	GALNT2	polypeptide N-acetylgalactosaminyltransferase 2	Polypeptide N-acetylgalactosaminyltransferases	2590	ENSG00000143641	-0.00656048	NA	0.271448	0.941496	-0.021443	NA
ATTTCCTGCGCAACTCTCGGAACC	TRCN0000466248	GPS2	G protein pathway suppressor 2		2874	ENSG00000132522	0.0743914	0.954813	0.0856192	0.982815	0.163548	0.946421
TATAGTCATACGTCTCGCGCGTCA	TRCN0000466249	IDS	iduronate 2-sulfatase	Sulfatases	3423	ENSG00000010404	-0.0113675	0.976647	-0.112121	0.870643	0.0218826	0.974085
TAACCGCTTATCTCAGGCCCCCAT	TRCN0000466250	SERPINA1	serpin family A member 1	Serpin peptidase inhibitors	5265	ENSG00000197249	-0.12248	0.660685	-0.0984999	0.894796	-0.0556994	0.928973
ACCCCGAATGCTCAGGTGATCTTA	TRCN0000466251	C16orf72	chromosome 16 open reading frame 72		29035	ENSG00000182831	-0.0851089	0.867337	0.0916835	0.915005	0.0955073	0.899264
AACGCGGCGTAGACCCCGGAAGCT	TRCN0000466252	SERPINB6	serpin family B member 6	Serpin peptidase inhibitors|Deafness associated genes	5269	ENSG00000124570	0.091867	0.838893	0.0531518	0.950052	0.176434	0.790665
CAACTTTTACGTTTGTATGGATCT	TRCN0000466253	TMEM100	transmembrane protein 100		55273	ENSG00000166292	-0.0313998	0.946131	-0.0843531	0.923688	0.0531663	0.937007
GTGGTTTGCAATCGTTCGATCATA	TRCN0000466255	ZNF521	zinc finger protein 521	Zinc fingers C2H2-type	25925	ENSG00000198795	0.0896132	0.818615	0.293129	0.487898	0.350669	0.350032
AGAATTAAGGAGCTCTCTAGTAAC	TRCN0000466257	CLCN4	chloride voltage-gated channel 4	Chloride voltage-gated channels	1183	ENSG00000073464	0.182413	0.785387	0.158051	0.948851	0.294342	0.757463
ACAACACCCACTGATGGAATCTCC	TRCN0000466260	PHF6	PHD finger protein 6	PHD finger proteins	84295	ENSG00000156531	-0.159318	0.508343	-0.0818053	0.912008	-0.244053	0.575471
CCATGCGCAATTCTGTAATAGGCG	TRCN0000466261	LCN6	lipocalin 6	Lipocalins	158062	ENSG00000267206	-0.22405	0.421048	-0.144734	0.843392	-0.124266	0.811301
AGGCACCTAGTCAATTGGCTGAAC	TRCN0000466262	CCDC60	coiled-coil domain containing 60		160777	ENSG00000183273	-0.0655901	0.914067	0.0151182	0.986036	-0.17943	0.830565
GTCGTATTTAGCCCTAATACTCGG	TRCN0000466263	GAGE1	G antigen 1		2543	ENSG00000205777	0.114744	0.717746	0.0324448	0.96718	0.0427887	0.955365
CATCGACAATAGGTAGTCAAACGT	TRCN0000478101	GAGE1	G antigen 1		2543	ENSG00000205777	-0.090367	0.732722	-0.163888	0.775071	-0.114693	0.799236
GACTTCAAATAAATAGCTTCACTC	TRCN0000466264	TUBA1A	tubulin alpha 1a	Tubulins	7846	ENSG00000167552	0.170839	0.504815	0.268828	0.438756	0.16687	0.698066
GTAAGGTTTGTACATCATTCAATA	TRCN0000466265	HERPUD2	HERPUD family member 2		64224	ENSG00000122557	0.257859	0.588991	-0.00418684	0.995211	-0.0802139	0.908876
CATTGAATCTTCATGTCCCACCAG	TRCN0000466266	ACKR2	atypical chemokine receptor 2	Atypical chemokine receptors	1238	ENSG00000144648	0.0170461	0.967262	-0.0349976	0.965881	0.0553536	0.924185
AACTGCACCTTATCCGGTTTGACC	TRCN0000491897	ACKR2	atypical chemokine receptor 2	Atypical chemokine receptors	1238	ENSG00000144648	0.244721	0.339606	0.147127	0.850831	0.213423	0.612426
ATGGGCCGGACGTATCGATTTTTA	TRCN0000488455	ACKR2	atypical chemokine receptor 2	Atypical chemokine receptors	1238	ENSG00000144648	0.109148	0.755954	0.122951	0.884817	0.167115	0.72568
GAATAATCCGTTCCGCGCGCTTAT	TRCN0000466267	MRPL23	mitochondrial ribosomal protein L23	Mitochondrial ribosomal proteins	6150	ENSG00000214026	0.211617	0.535324	0.161475	0.852673	0.162483	0.764547
GGCCCTATAACGGGCCCAATGTCC	TRCN0000466268	PCCB	propionyl-CoA carboxylase subunit beta		5096	ENSG00000114054	0.322739	0.518711	0.195288	0.932053	0.298548	0.754048
GTACGCTATTTAGTCTCCATTACA	TRCN0000488835	OGFR	opioid growth factor receptor		11054	ENSG00000060491	-0.264162	0.728933	-0.270575	0.928666	-0.255505	0.867309
AATTACCCTGGCTTCCGAGATGTA	TRCN0000489561	OGFR	opioid growth factor receptor		11054	ENSG00000060491	-0.0758567	0.947492	-0.171037	0.955186	-0.064957	0.982971
CAATTACCCGTTGGCGTTACTGCA	TRCN0000466269	OGFR	opioid growth factor receptor		11054	ENSG00000060491	-0.186095	0.810805	-0.0420647	0.984813	-0.0848804	0.96971
TGATTATCATCGAGACCCGACAGC	TRCN0000466270	MAP7	microtubule associated protein 7		9053	ENSG00000135525	0.0196738	NA	NA	NA	0.00212773	NA
TAGGAATTCTAGGAGGTCCACTAG	TRCN0000466271	KRTAP10-1	keratin associated protein 10-1	Keratin associated proteins	386677	ENSG00000215455	0.033712	0.911519	-0.0247321	0.971415	-0.015623	0.979993
ATCTTCTCATTATAATACCATTGG	TRCN0000466272	CRCT1	cysteine rich C-terminal 1	Late cornified envelope proteins	54544	ENSG00000169509	0.286926	0.183517	0.243371	0.574105	0.280789	0.355742
GTGCAGATCGGTCTCTATCGGCTT	TRCN0000466273	ZNF484	zinc finger protein 484	Zinc fingers C2H2-type	83744	ENSG00000127081	0.0829367	0.935997	0.343966	0.856713	-0.23832	0.87193
GCACAGGACATCCCGTTACCTTTA	TRCN0000466274	FAM160B2	family with sequence similarity 160 member B2	Armadillo-like helical domain containing	64760	ENSG00000158863	-0.304309	0.6646	0.0997603	0.966764	0.0948498	0.960234
GACAACTTTTGTCCTCCGTTCTGC	TRCN0000466275	SMCO4	single-pass membrane protein with coiled-coil domains 4		56935	ENSG00000166002	0.039034	0.937008	0.123494	0.897874	0.0219203	0.982674
TCAATTGTATCAAAAATTAAGTCA	TRCN0000466276	EPB41L4A	erythrocyte membrane protein band 4.1 like 4A	FERM domain containing	64097	ENSG00000129595	0.0885768	0.836103	-0.0661689	0.945108	0.0725748	0.933023
ATACTAGCCTTCTCAAACGCGGCT	TRCN0000473321	THAP4	THAP domain containing 4	THAP domain containing	51078	ENSG00000176946	0.160273	0.872114	0.232446	0.937543	-0.00976934	0.995414
ACCACGTATTGTGGCGGGGTTCAA	TRCN0000466277	THAP4	THAP domain containing 4	THAP domain containing	51078	ENSG00000176946	-0.114711	0.910546	-0.0282161	0.99157	0.0210121	0.993103
TCGTCGCATGACCCCCTGATAATT	TRCN0000466278	RCN1	reticulocalbin 1	EF-hand domain containing	5954	ENSG00000049449	-0.186741	0.756624	0.258197	0.885558	-0.0471361	0.980778
ACCACACCCAGACGTTCCTTTATC	TRCN0000466279	TFIP11	tuftelin interacting protein 11	G-patch domain containing|Spliceosomal B complex	24144	ENSG00000100109	-0.00244771	0.996722	-0.326638	0.847941	-0.0120258	0.993397
TTCACCACTTTACTGCAACAGCAG	TRCN0000469503	LZTS2	leucine zipper tumor suppressor 2	Leucine zipper tumor suppressor family	84445	ENSG00000107816	-0.033546	NA	0.401099	0.916652	0.000300845	NA
AAAATAGAGTATAACAAAGCAATT	TRCN0000466280	LZTS2	leucine zipper tumor suppressor 2	Leucine zipper tumor suppressor family	84445	ENSG00000107816	0.666699	0.255604	0.121184	0.97769	-0.0101718	NA
ATGCGAGTTTAAATCCTACAAGTC	TRCN0000466282	CALHM3	calcium homeostasis modulator 3	Calcium homeostasis modulators	119395	ENSG00000183128	0.199664	0.629676	0.203849	0.821339	0.161432	0.798343
TTCCCATGAGACACGCAACATGTA	TRCN0000466284	SYT1	synaptotagmin 1	Synaptotagmins	6857	ENSG00000067715	-0.0138102	0.975546	-0.0275767	0.978664	-0.00210872	0.997923
TGCTGCTAACGTGGTAAGAACGAG	TRCN0000466286	SERPINF1	serpin family F member 1	Serpin peptidase inhibitors	5176	ENSG00000132386	-0.119511	0.732323	-0.127614	0.882265	-0.193095	0.696527
ATAAAACGCCTACGGAACGTTAGC	TRCN0000474610	SERPINF1	serpin family F member 1	Serpin peptidase inhibitors	5176	ENSG00000132386	NA	NA	NA	NA	NA	NA
GAAACGCCTGAGTCGGACGTTTTA	TRCN0000466287	MKS1	Meckel syndrome, type 1	Bardet-Biedl syndrome associated|B9 domain containing|MKS complex	54903	ENSG00000011143	0.251724	0.366935	0.0805312	0.929222	0.151931	0.800851
CGAAGCACATCCAGTGACGGAGTC	TRCN0000480501	EWSR1	EWS RNA binding protein 1	Zinc fingers RANBP2-type |RNA binding motif containing	2130	ENSG00000182944	-0.385395	0.454795	-0.364078	0.799105	-0.263116	0.830846
AAGTCCGCGGCTTAGCAAAGCCGG	TRCN0000466288	EWSR1	EWS RNA binding protein 1	Zinc fingers RANBP2-type |RNA binding motif containing	2130	ENSG00000182944	0.205756	0.565883	0.15763	0.857702	0.00199403	0.997368
ACCGTTATATTTCTCCACCACGAA	TRCN0000489183	DYNC1I1	dynein cytoplasmic 1 intermediate chain 1	WD repeat domain containing|Dyneins, cytoplasmic	1780	ENSG00000158560	0.0741058	0.882368	-0.0442096	0.968737	-0.0635958	0.954797
ACTAATTGATGGCGTAAGAATCCG	TRCN0000466291	DYNC1I1	dynein cytoplasmic 1 intermediate chain 1	WD repeat domain containing|Dyneins, cytoplasmic	1780	ENSG00000158560	0.09713	0.848618	-0.0720155	0.952319	-0.132326	0.876985
GTATGAACGGGGAGATCAGTGTAC	TRCN0000474539	DYNC1I1	dynein cytoplasmic 1 intermediate chain 1	WD repeat domain containing|Dyneins, cytoplasmic	1780	ENSG00000158560	0.245843	0.685469	0.14089	0.95554	-0.0309375	0.992209
ACAAAAGTCTGGCCGGTCAGATAC	TRCN0000474666	DYNC1I1	dynein cytoplasmic 1 intermediate chain 1	WD repeat domain containing|Dyneins, cytoplasmic	1780	ENSG00000158560	0.184404	0.625215	-0.0698362	0.950663	0.100303	0.907335
CTATCTGCAGCAGGGTTCGCCTAG	TRCN0000466292	ALDOC	aldolase, fructose-bisphosphate C		230	ENSG00000109107	0.0551266	0.896797	-0.0903523	0.915422	0.0868	0.888977
CAGACGCTGAAGCCGACCTTGACA	TRCN0000488211	ALDOC	aldolase, fructose-bisphosphate C		230	ENSG00000109107	-0.0730607	0.811885	-0.0821401	0.900235	-0.171002	0.735105
CGATAGAGCAGACAAACCTTGAAA	TRCN0000488429	ALDOC	aldolase, fructose-bisphosphate C		230	ENSG00000109107	-0.154681	0.561359	-0.156593	0.789891	-0.215819	0.561617
TCCCCAGATCCGTAGGAGGAGATA	TRCN0000466293	PDCD1LG2	programmed cell death 1 ligand 2	CD molecules|Endogenous ligands|Immunoglobulin like domain containing	80380	ENSG00000197646	0.0532903	0.900078	-0.0511474	0.956207	-0.143551	0.781627
CACCGGTCACTCCACAAACCAGGC	TRCN0000488881	PDCD1LG2	programmed cell death 1 ligand 2	CD molecules|Endogenous ligands|Immunoglobulin like domain containing	80380	ENSG00000197646	-0.13181	0.64546	-0.184457	0.718386	-0.0794019	0.880438
TGCATTCGATCGACAGGTTTTAAA	TRCN0000466294	CDC42SE2	CDC42 small effector 2		56990	ENSG00000158985	-0.174908	0.762921	-0.174678	0.853288	-0.287268	0.600318
TGCCTTCATATACCCTGATGACTT	TRCN0000466295	FUK	fucokinase		197258	ENSG00000157353	-0.190173	0.862055	-0.153142	0.966633	-0.303746	0.867196
CCCGCAGAGACAACAGGGACAGAA	TRCN0000466621	FUK	fucokinase		197258	ENSG00000157353	-0.577463	0.269446	-0.946488	0.0643267	-0.289576	0.845776
GTTGCAAGGTCCCATCCCTAGGTC	TRCN0000466296	SHD	Src homology 2 domain containing transforming protein D	SH2 domain containing	56961	ENSG00000105251	0.0542683	0.928986	0.120198	0.906807	-0.101405	0.94496
ATGGATTAGCTTCGCTAACGGTTA	TRCN0000466298	TSEN54	tRNA splicing endonuclease subunit 54	tRNA-splicing endonuclease subunits	283989	ENSG00000182173	0.0951867	0.908007	0.168871	0.94376	0.211669	0.859988
GCGAATTAGCAAAAGAGCGTCGAG	TRCN0000466299	ATRNL1	attractin like 1	C-type lectin domain containing	26033	ENSG00000107518	-0.101829	0.907124	-0.250022	0.917148	-0.181862	0.898832
CGGCAGCAAGTCATAGCTCGCCGG	TRCN0000466300	DCBLD2	discoidin, CUB and LCCL domain containing 2		131566	ENSG00000057019	-0.024854	0.967861	-0.384926	0.687146	-0.0642197	0.958767
CAAAGGACAATTCCCCTACTCTTT	TRCN0000466301	CDC42EP4	CDC42 effector protein 4	CDC42 effector proteins	23580	ENSG00000179604	-0.0166109	0.972819	0.134272	0.871704	0.115321	0.841057
AGAGAATGAACACCCATCGACACC	TRCN0000478913	CDC42EP4	CDC42 effector protein 4	CDC42 effector proteins	23580	ENSG00000179604	-0.0231304	0.967393	0.0565147	0.943401	0.0414156	0.960057
TTATTACCCTTTCAAATACTATGG	TRCN0000481612	TRIM31	tripartite motif containing 31	Ring finger proteins|Tripartite motif containing	11074	ENSG00000204616	0.17199	0.74524	0.116427	0.915423	0.242545	0.652328
ACAATTATCATTACTCACCGTGAG	TRCN0000466303	TRIM31	tripartite motif containing 31	Ring finger proteins|Tripartite motif containing	11074	ENSG00000204616	0.0438806	0.880641	0.130784	0.810115	0.0490262	0.928409
TGTCTAACATCGACCAGAGACGTC	TRCN0000470027	LRRFIP1	LRR binding FLII interacting protein 1		9208	ENSG00000124831	-0.107137	0.807296	-0.254714	0.74154	-0.120193	0.88132
TGCATCGCAGTTCCCCTTGCGCGT	TRCN0000466304	LRRFIP1	LRR binding FLII interacting protein 1		9208	ENSG00000124831	-0.175572	0.553046	-0.226939	0.580991	-0.238646	0.405617
ACAAAAGAGATATGAGTGGAACCG	TRCN0000469774	ARSG	arylsulfatase G	Sulfatases	22901	ENSG00000141337	-0.165776	0.850932	-0.193307	0.948759	0.203479	0.881714
CGATAGACTCGCTCTCTATTGGCC	TRCN0000466305	ARSG	arylsulfatase G	Sulfatases	22901	ENSG00000141337	-0.311357	0.572398	-0.353745	0.769332	-0.240874	0.843431
CTAATCTCCCGAAAGCCTCATTGA	TRCN0000466306	PIP4K2C	phosphatidylinositol-5-phosphate 4-kinase type 2 gamma		79837	ENSG00000166908	-0.0977631	0.824598	-0.0480124	0.967281	-0.0909688	0.904576
CAGGGATGGGGACCTGCTCTTTAT	TRCN0000488577	PIP4K2C	phosphatidylinositol-5-phosphate 4-kinase type 2 gamma		79837	ENSG00000166908	-0.0523643	0.928774	-0.00652835	0.996665	-0.0568486	0.955315
TCTGAACAGGATCTTATGTTGATC	TRCN0000480714	DTYMK	deoxythymidylate kinase		1841	ENSG00000168393	0.0315932	0.959521	0.17716	0.854578	-0.136809	0.925706
CACGGAACTGCATGCTACGGTTCA	TRCN0000492004	DTYMK	deoxythymidylate kinase		1841	ENSG00000168393	-0.155324	0.690121	0.0529403	0.95155	-0.00191001	0.997917
TCAATAGACATCCTCCAGTAACCA	TRCN0000489847	DTYMK	deoxythymidylate kinase		1841	ENSG00000168393	0.0369607	0.95007	0.0588518	0.958563	-0.0857672	0.930743
CGTCCGCCCATGCCCTTATCAGAA	TRCN0000480936	DTYMK	deoxythymidylate kinase		1841	ENSG00000168393	-0.353606	0.314678	-0.253348	0.74757	-0.167957	0.793354
TGCTAATAGTGTGCCCGTTCTCCC	TRCN0000487894	DTYMK	deoxythymidylate kinase		1841	ENSG00000168393	-0.0171379	0.979893	-0.245981	0.801814	-0.156038	0.871799
AACGCATCCACTATATGTGTCCCA	TRCN0000466307	DTYMK	deoxythymidylate kinase		1841	ENSG00000168393	0.167601	0.682704	0.264959	0.74709	0.154012	0.839705
GAGACGCATTACAAAGCGAACTGG	TRCN0000466874	RPL14	ribosomal protein L14	L ribosomal proteins	9045	ENSG00000188846	-0.0352825	0.945473	0.0308668	0.969098	0.0517313	0.933463
TGTGGTTCTCGGCCTTCACAGGTC	TRCN0000471415	RPL14	ribosomal protein L14	L ribosomal proteins	9045	ENSG00000188846	-0.109284	0.657392	-0.15583	0.78589	-0.150927	0.624769
TGTTCCGATGTAGGCGTAGCGGGT	TRCN0000466309	RPL14	ribosomal protein L14	L ribosomal proteins	9045	ENSG00000188846	-0.098861	0.84094	-0.0319428	0.981404	0.0940973	0.914646
TAGTTGTATCTACGCTAATATACG	TRCN0000468063	RPL14	ribosomal protein L14	L ribosomal proteins	9045	ENSG00000188846	0.00317211	0.992187	0.0393149	0.958261	-0.0218435	0.982032
CAATCGACGCTAAAGTGACCAGGA	TRCN0000471134	RPL14	ribosomal protein L14	L ribosomal proteins	9045	ENSG00000188846	-0.0694582	0.817456	-0.0684916	0.908034	-0.0416327	0.938526
ATCCCTACTCATTCACACTAAGCT	TRCN0000466310	RAB17	RAB17, member RAS oncogene family	RAB, member RAS oncogene GTPases	64284	ENSG00000124839	0.218174	0.37956	0.0527073	0.942888	0.137943	0.781989
CCGCTTTGTATCTGACCCACTGGA	TRCN0000469773	RAB17	RAB17, member RAS oncogene family	RAB, member RAS oncogene GTPases	64284	ENSG00000124839	0.00694632	0.989726	-0.0976294	0.91889	-0.157364	0.830057
AGTAAACGTTTAATAATTGCACTC	TRCN0000466311	IL20	interleukin 20	Interleukins	50604	ENSG00000162891	0.186812	0.602735	-0.0427405	0.965572	-0.0425838	0.967154
AAGTTCTTCTTGTCAAACGAACTG	TRCN0000488724	CRCP	CGRP receptor component		27297	ENSG00000241258	0.28931	0.472665	0.257043	0.738332	0.105162	0.912027
GGGAGGACGGGTCATTGCGTAGCG	TRCN0000466312	CRCP	CGRP receptor component		27297	ENSG00000241258	-0.208967	0.43953	-0.0976986	0.904182	-0.00195858	0.996859
TTCGTATGTTCCAAAAAACCTTCT	TRCN0000466314	IFI16	interferon gamma inducible protein 16	Pyrin domain containing|Pyrin and HIN domain family	3428	ENSG00000163565	0.0793024	0.917938	0.210453	0.926358	0.101053	0.948686
TCTCCCTCGCTCACAACAGAAACA	TRCN0000466316	PEX11G	peroxisomal biogenesis factor 11 gamma	Peroxins	92960	ENSG00000104883	0.0567156	0.841119	0.0333896	0.950128	0.0202579	0.969145
GGGCATCTCTCTGCAGTCTTGACA	TRCN0000466317	C6orf203	chromosome 6 open reading frame 203		51250	ENSG00000130349	-0.0552691	0.854168	0.0612995	0.909909	0.0103433	0.983131
GGTACTTTGACGCCGCGTTAGGAC	TRCN0000466318	PRPF40A	pre-mRNA processing factor 40 homolog A	Spliceosomal A complex	55660	ENSG00000196504	0.00508591	0.987014	-0.00310019	0.993706	0.161966	0.665837
GCTCTTGCTCTGCGATCATTGGTA	TRCN0000466319	KPNA2	karyopherin subunit alpha 2	Armadillo repeat containing|Importins	3838	ENSG00000182481	0.205738	0.743216	0.40594	0.676277	0.0746724	0.967779
TTATCCCTTGGCTCGCCAGAATCG	TRCN0000469404	KPNA2	karyopherin subunit alpha 2	Armadillo repeat containing|Importins	3838	ENSG00000182481	-0.073541	0.866492	-0.0053162	0.995989	0.16518	0.705969
ACACTGAACAATCCAGAGAGTTCA	TRCN0000491681	KPNA2	karyopherin subunit alpha 2	Armadillo repeat containing|Importins	3838	ENSG00000182481	0.00997349	0.979203	-0.124941	0.855566	-0.146171	0.75391
TGTCTCCACTTATTGAAGGTCAAG	TRCN0000466321	NDUFS3	NADH:ubiquinone oxidoreductase core subunit S3	NADH:ubiquinone oxidoreductase core subunits	4722	ENSG00000213619	-0.428698	0.547168	-0.499777	0.804157	0.27046	0.910476
CGCACACTCACTTAATCGTGGATC	TRCN0000466322	PCDHGA5	protocadherin gamma subfamily A, 5	Clustered protocadherins	56110	ENSG00000253485	-0.0875634	0.910845	-0.137378	0.953254	-0.312051	0.755815
TTAAAATAGGCACATTTAAGAAGG	TRCN0000489242	MAP4K3	mitogen-activated protein kinase kinase kinase kinase 3	Mitogen-activated protein kinase kinase kinase kinases	8491	ENSG00000011566	0.253593	0.72227	-0.0777038	0.973216	0.0511068	0.98795
GTTACTAACTGCTTGTCGTGATCA	TRCN0000472930	MAP4K3	mitogen-activated protein kinase kinase kinase kinase 3	Mitogen-activated protein kinase kinase kinase kinases	8491	ENSG00000011566	0.367993	0.578494	0.181963	0.950768	0.216963	0.899159
AAGAATCCAGGAGATGAAACCATC	TRCN0000491548	MAP4K3	mitogen-activated protein kinase kinase kinase kinase 3	Mitogen-activated protein kinase kinase kinase kinases	8491	ENSG00000011566	-0.115789	0.911852	-0.0173916	0.994692	-0.0702852	0.979956
CACGGACAGTCGCTCTGTAAGGGC	TRCN0000466325	MAP4K3	mitogen-activated protein kinase kinase kinase kinase 3	Mitogen-activated protein kinase kinase kinase kinases	8491	ENSG00000011566	-0.0407112	0.94348	-0.0847255	0.937104	-0.152669	0.841904
AAAATCACCTATTCTTTGCGCTCG	TRCN0000466326	LAMP5	lysosomal associated membrane protein family member 5		24141	ENSG00000125869	0.490884	0.443897	0.548731	0.634548	0.124624	0.955961
CTTCTATGCCATAGGGAACGGAGT	TRCN0000466327	RNF144A	ring finger protein 144A	Ring finger proteins|RBR E3 ubiquitin ligases	9781	ENSG00000151692	-0.0258747	0.964618	0.0411548	0.967647	0.131932	0.85823
AACATCCTAACTACGGTTTCCGAG	TRCN0000466328	PEMT	phosphatidylethanolamine N-methyltransferase		10400	ENSG00000133027	0.0181685	0.985558	0.0491055	0.984319	0.011675	0.994077
AGATCCTCCGTTAGCACCAACTTT	TRCN0000480159	PEMT	phosphatidylethanolamine N-methyltransferase		10400	ENSG00000133027	0.0568898	0.948718	-0.105448	0.959829	0.20959	0.844735
CAAGTTTAACCACGTTAGCTCTGC	TRCN0000466329	CYP2J2	cytochrome P450 family 2 subfamily J member 2	Cytochrome P450 family 2	1573	ENSG00000134716	-0.178558	0.607559	-0.197042	0.770061	-0.0293598	0.972093
TCACCGTCTCGAGAAGACCACTGA	TRCN0000466330	PDLIM7	PDZ and LIM domain 7	LIM domain containing|PDZ domain containing	9260	ENSG00000196923	-0.00338164	0.99492	-0.0839685	0.903147	-0.182201	0.67725
ACAAGGGCGCAACGTACTCCCCAT	TRCN0000472937	PDLIM7	PDZ and LIM domain 7	LIM domain containing|PDZ domain containing	9260	ENSG00000196923	-0.0421707	0.913367	-0.160134	0.811175	-0.0822159	0.885816
GCGCCAGGTAGACTTACACACAGT	TRCN0000474842	PDLIM7	PDZ and LIM domain 7	LIM domain containing|PDZ domain containing	9260	ENSG00000196923	-0.0895877	0.797276	-0.0584048	0.949268	0.0235398	0.98011
ATGGCGATGTCGCCTTACTAGACT	TRCN0000466331	VSIR	V-set immunoregulatory receptor	V-set domain containing	64115	ENSG00000107738	0.210786	0.386587	0.121056	0.85669	0.184015	0.69332
CCTCTGTTATACTCCGCTGCAGGG	TRCN0000473232	QPRT	quinolinate phosphoribosyltransferase		23475	ENSG00000103485	-0.0904706	0.775124	0.000188418	0.992566	0.0209459	0.972793
TAGGTTGCAGCCCCCAGTGCCACG	TRCN0000466332	QPRT	quinolinate phosphoribosyltransferase		23475	ENSG00000103485	-0.0584787	0.828197	-0.076848	0.893811	-0.147231	0.619676
TGGGGTTTAATTGCATTCTTGTTA	TRCN0000466333	HIST1H2AG	histone cluster 1 H2A family member g	Histones	8969	ENSG00000196787	-0.261965	0.310576	-0.286521	0.459719	-0.229027	0.586877
TCCTCCAGAACTTACTGAGGACAC	TRCN0000466334	MMP10	matrix metallopeptidase 10	M10 matrix metallopeptidases	4319	ENSG00000166670	0.0767446	0.836103	-0.0248841	0.98046	-0.00511653	0.995042
CCAGCATTAACAGTACGACAGCCC	TRCN0000489027	MMP10	matrix metallopeptidase 10	M10 matrix metallopeptidases	4319	ENSG00000166670	-0.086316	0.78145	-0.129601	0.876172	-0.0992731	0.845307
CGCCAGTCCTAGTCCAGTGTGGGA	TRCN0000474760	VAMP3	vesicle associated membrane protein 3	Vesicle associated membrane proteins	9341	ENSG00000049245	-0.178827	0.45876	-0.220092	0.638614	-0.121515	0.802585
AGATTATGACGAGTAGCCTTGCAA	TRCN0000466336	VAMP3	vesicle associated membrane protein 3	Vesicle associated membrane proteins	9341	ENSG00000049245	-0.0876696	0.78967	0.138647	0.848597	0.0596526	0.920071
GGTCCACCCAGTTCAATATTGTTG	TRCN0000466337	RNF133	ring finger protein 133	Ring finger proteins	168433	ENSG00000188050	0.126394	0.728763	0.0785356	0.911708	-0.0160169	0.987786
TTCTTCGAGTTTGTCCCAAGCACA	TRCN0000466338	CLUHP3	clustered mitochondria homolog pseudogene 3		100132341	ENSG00000131797	0.0579986	0.915993	0.0583229	0.949462	0.266956	0.568808
ACAGCTGACTTCAACCTCCTACAC	TRCN0000470060	CLUHP3	clustered mitochondria homolog pseudogene 3		100132341	ENSG00000131797	-0.0153602	0.976438	0.0223285	0.975204	-0.0874703	0.880135
CTTCAACCATAGCAGAAAAGTGCA	TRCN0000476240	FBXW12	F-box and WD repeat domain containing 12	WD repeat domain containing|F-box and WD repeat domain containing	285231	ENSG00000164049	-0.0549478	0.886089	0.00692682	0.988624	0.109939	0.80218
AGCCGATGTTGGCGCCACTGGTCA	TRCN0000466340	FBXW12	F-box and WD repeat domain containing 12	WD repeat domain containing|F-box and WD repeat domain containing	285231	ENSG00000164049	0.0019998	0.995716	-0.00616267	0.996065	-0.241815	0.582768
AGCACCTTTCGTAAGCCTAGTAAC	TRCN0000466341	CCHCR1	coiled-coil alpha-helical rod protein 1		54535	ENSG00000204536	0.134678	0.86953	-0.194837	0.941496	-0.0810464	0.962615
ATGTCCCGGCCCCCCTTAATCACA	TRCN0000466342	FHL2	four and a half LIM domains 2	LIM domain containing	2274	ENSG00000115641	0.172043	0.670157	0.10069	0.916584	0.143039	0.837586
ATACCCAGAGCCGAATTACCGTCC	TRCN0000466343	ZMAT2	zinc finger matrin-type 2	Zinc fingers matrin-type|Spliceosomal B complex	153527	ENSG00000146007	0.142856	0.672658	0.242582	0.63458	0.284193	0.466029
CGCAGGAGGCATCCGCAAAATCTA	TRCN0000466345	RAB40B	RAB40B, member RAS oncogene family	RAB, member RAS oncogene GTPases	10966	ENSG00000141542	-0.224115	0.38767	-0.314435	0.386541	-0.304809	0.234079
AACTACCTCTTCTATCTATCTCAT	TRCN0000466346	TRMT61B	tRNA methyltransferase 61B	tRNA methyltransferases	55006	ENSG00000171103	0.295823	0.658664	0.107229	0.967882	0.288497	0.806208
TCCCCAGGCAACGGGTCGTTGTAT	TRCN0000491947	TRMT61B	tRNA methyltransferase 61B	tRNA methyltransferases	55006	ENSG00000171103	0.0207866	0.960726	0.0368572	0.959819	-0.0616971	0.92437
TTATATGGTATAACTAGCCCGCGC	TRCN0000466347	C1orf109	chromosome 1 open reading frame 109		54955	ENSG00000116922	0.104153	0.747476	0.253359	0.589717	0.254321	0.505164
ACCGAATTAGGCCTTTTTCGACCC	TRCN0000466348	GLYCTK	glycerate kinase		132158	ENSG00000168237	-0.0548507	0.921211	-0.164943	0.888321	0.116361	0.896391
ACGATTACTCCTTACTTACGCACT	TRCN0000474441	GLYCTK	glycerate kinase		132158	ENSG00000168237	-0.132067	0.793613	-0.109409	0.919596	-0.0407814	0.971687
TACCTGATAATGGCACCATGCAAA	TRCN0000466349	DEFB129	defensin beta 129	Defensins, beta	140881	ENSG00000125903	-0.0276731	0.952048	-0.00577093	0.995759	-0.016441	0.98299
AGCACCGTACTCTTATGAAATACT	TRCN0000466350	EMC3	ER membrane protein complex subunit 3		55831	ENSG00000125037	-0.0699956	0.837759	0.152862	0.741441	-0.069736	0.905012
TCGCTCAGCAAGCATCAAAAGTCT	TRCN0000469654	SKP1	S-phase kinase associated protein 1	SCF complex	6500	ENSG00000113558	-0.236519	0.381045	-0.128023	0.868495	-0.0455671	0.962618
CCCACTCAGCCTAGGTGTAGATCA	TRCN0000466353	SKP1	S-phase kinase associated protein 1	SCF complex	6500	ENSG00000113558	-0.20729	0.850017	-0.301508	0.923209	-0.216661	0.907972
TAAAAAAACATGTTATCTATAAGA	TRCN0000476574	HIST2H2BF	histone cluster 2 H2B family member f	Histones	440689	ENSG00000203814	0.173656	0.646662	0.197102	0.823052	0.166427	0.779623
TTCTAACCCCTTTGTAGACCAATG	TRCN0000466355	HIST2H2BF	histone cluster 2 H2B family member f	Histones	440689	ENSG00000203814	0.18253	0.331938	0.0943979	0.85865	0.131465	0.699323
GTAGACCCTATCTTCCATAATCCG	TRCN0000466356	CABP7	calcium binding protein 7	EF-hand domain containing	164633	ENSG00000100314	-0.00481425	0.994992	-0.118107	0.904046	0.274756	0.649828
ACGACATTCAAGTGTACCCTATGC	TRCN0000466357	UCP2	uncoupling protein 2	Solute carriers	7351	ENSG00000175567	0.0155865	0.976332	0.0541597	0.955192	0.0820516	0.903468
AGGTGGTACATCCGCCGCACTACC	TRCN0000466358	GDE1	glycerophosphodiester phosphodiesterase 1		51573	ENSG00000006007	0.181341	0.584297	0.0911139	0.919993	0.0478214	0.954468
GAAAATAACATGTTCGTTAATAGC	TRCN0000479516	GDE1	glycerophosphodiester phosphodiesterase 1		51573	ENSG00000006007	-0.117708	0.736558	0.155561	0.789507	0.186435	0.647267
ATCCGAGGGCGAACACCGCACGGC	TRCN0000466359	ZNF473	zinc finger protein 473	Zinc fingers C2H2-type	25888	ENSG00000142528	0.0789639	0.944119	0.0454944	0.988665	-0.524064	0.646706
AACACTTTGTTCCTTAGACAGTAA	TRCN0000466360	RPN1	ribophorin I	Oligosaccharyltransferase complex subunits	6184	ENSG00000163902	0.00818198	0.993823	0.0213696	0.994487	0.242531	0.818998
CATATCCCTGTTCATGTATCTACT	TRCN0000466361	PINX1	PIN2 (TERF1) interacting telomerase inhibitor 1	G-patch domain containing	54984		-0.101802	0.857496	0.0106219	0.991154	0.131128	0.879281
CTCCACGGCACCAAGATTTTCTAG	TRCN0000466362	SLC1A7	solute carrier family 1 member 7	Solute carriers	6512	ENSG00000162383	-0.101201	0.734222	-0.0659734	0.925137	-0.246236	0.505913
CCAAGTATGCTATACAATTACTCC	TRCN0000491540	SLC1A7	solute carrier family 1 member 7	Solute carriers	6512	ENSG00000162383	-0.19096	0.325851	-0.0643234	0.912912	-0.11593	0.736091
CTACTTATCCTGAACTACCACGTC	TRCN0000472841	SLC1A7	solute carrier family 1 member 7	Solute carriers	6512	ENSG00000162383	-0.0726893	0.931366	-0.063126	0.976177	-0.101892	0.954278
GATAACGTGACCGCTAGGGGTCCA	TRCN0000481643	ARAF	A-Raf proto-oncogene, serine/threonine kinase	Mitogen-activated protein kinase kinase kinases|RAF family	369	ENSG00000078061	-0.147088	0.812294	-0.0647725	0.970678	-0.11521	0.932476
TTAATCGCAATTCTTCAACCCGCT	TRCN0000466438	ARAF	A-Raf proto-oncogene, serine/threonine kinase	Mitogen-activated protein kinase kinase kinases|RAF family	369	ENSG00000078061	0.108291	0.887764	-0.204059	0.932053	-0.153717	0.922086
CCTGGGTTTACAGATGTGGCTTAC	TRCN0000466363	ARAF	A-Raf proto-oncogene, serine/threonine kinase	Mitogen-activated protein kinase kinase kinases|RAF family	369	ENSG00000078061	-0.1049	0.85162	-0.309824	0.818358	-0.295429	0.717743
TACTCTTTCGACAGCCAACCCGGG	TRCN0000487716	ARAF	A-Raf proto-oncogene, serine/threonine kinase	Mitogen-activated protein kinase kinase kinases|RAF family	369	ENSG00000078061	-0.123561	0.869642	-0.147631	0.947996	-0.0979407	0.954278
TTAGGTTTCCAGCGTTGTGTGGTT	TRCN0000466364	RBM5	RNA binding motif protein 5	Zinc fingers RANBP2-type |G-patch domain containing|RNA binding motif containing|Spliceosomal A complex	10181	ENSG00000003756	0.0610634	0.889443	0.0621228	0.944774	-0.019726	0.984169
TCGCTTATATTCATGCGACGACGA	TRCN0000466365	CPB2	carboxypeptidase B2	M14 carboxypeptidases	1361	ENSG00000080618	0.150214	0.55634	0.11345	0.868744	-0.000521357	0.996903
ATTATTCCTATCCGAAATTATCGA	TRCN0000466366	KMO	kynurenine 3-monooxygenase		8564	ENSG00000117009	0.220893	0.594489	0.406331	0.401558	0.341789	0.566133
TTTCTAATATATTCGTGTACGTCC	TRCN0000466367	ERCC2	ERCC excision repair 2, TFIIH core complex helicase subunit	General transcription factors|Xeroderma pigmentosum complementation groups|DNA helicases|ERCC excision repair associated	2068	ENSG00000104884	0.244336	0.451232	0.221959	0.750265	0.331029	0.437846
CCGCACTCCATTGCACTACACTAG	TRCN0000489249	TAS2R43	taste 2 receptor member 43	Taste 2 receptors	259289	ENSG00000255374	-0.157792	0.825169	-0.176944	0.933514	-0.131087	0.93479
TATAGCGGGATGGACCCCGAGCCC	TRCN0000489520	TAS2R43	taste 2 receptor member 43	Taste 2 receptors	259289	ENSG00000255374	-0.0310266	0.976273	-0.070097	0.973216	-0.22266	0.874346
GCCCGCTCTGTAGTCCCCTGTTCG	TRCN0000466368	TAS2R43	taste 2 receptor member 43	Taste 2 receptors	259289	ENSG00000255374	0.094072	0.917008	0.0905526	0.968608	0.249556	0.842569
CAGCCAGTACCTGTGCTGATGCGT	TRCN0000466371	RNF214	ring finger protein 214	Ring finger proteins	257160	ENSG00000167257	-0.0300323	0.971029	-0.185138	0.932053	-0.125461	0.937308
CCCATCAATCACCGCTCGGGAGTC	TRCN0000469455	PIGO	phosphatidylinositol glycan anchor biosynthesis class O	Phosphatidylinositol glycan anchor biosynthesis	84720	ENSG00000165282	-0.0616321	0.847534	-0.0334452	0.966275	-0.128458	0.736066
TGCGCTAGCTCGGAATTCCATATT	TRCN0000466373	PIGO	phosphatidylinositol glycan anchor biosynthesis class O	Phosphatidylinositol glycan anchor biosynthesis	84720	ENSG00000165282	-0.0801841	0.846914	-0.0919557	0.921785	-0.0404402	0.96161
TAAGCGAGCACCTAGCTCAGCAGC	TRCN0000466374	MRPS34	mitochondrial ribosomal protein S34	Mitochondrial ribosomal proteins	65993	ENSG00000074071	-0.0831441	0.869036	-0.062931	0.950259	-0.0568593	0.952805
ATGGGATTTGGGGATCTCGTGGGG	TRCN0000466376	ESAM	endothelial cell adhesion molecule	V-set domain containing|Immunoglobulin like domain containing|IgCAM CXADR-related subfamily	90952	ENSG00000149564	0.182354	0.602343	-0.0169139	0.990789	0.014176	0.987606
TGATTTCAACACTTCATTTTCAGG	TRCN0000466378	ZNF562	zinc finger protein 562	Zinc fingers C2H2-type	54811	ENSG00000171466	0.0431821	0.941137	0.194672	0.785222	0.00549934	0.993874
TATTTTGTACGAACGAAAATCAGA	TRCN0000466379	CLEC11A	C-type lectin domain containing 11A	C-type lectin domain containing	6320	ENSG00000105472	-0.260078	0.509603	-0.257597	0.762806	-0.399738	0.311181
TGAATAAAGTGCCTTTAGTGCACG	TRCN0000466380	ETV7	ETS variant 7	ETS transcription factor family	51513	ENSG00000010030	-0.285496	0.309761	-0.200932	0.731426	-0.209608	0.612488
TTGTACCAGTACGCTCCTGGTCAC	TRCN0000477878	ZNF776	zinc finger protein 776	Zinc fingers C2H2-type	284309	ENSG00000152443	-0.0541442	0.898788	-0.0412923	0.969277	0.0245695	0.979931
ACCCGAATTGGCAACAGCGTTTCA	TRCN0000466381	ZNF776	zinc finger protein 776	Zinc fingers C2H2-type	284309	ENSG00000152443	-0.118443	0.596446	-0.0340141	0.9592	-0.0653214	0.880411
ACTACCCGATGGAAACATAATCTC	TRCN0000466382	ZNF75A	zinc finger protein 75a	Zinc fingers C2H2-type	7627	ENSG00000162086	0.0337191	0.920255	0.0226129	0.96981	-0.0739148	0.89384
AATACCATGACCAACAATAAGCCC	TRCN0000474225	ZNF75A	zinc finger protein 75a	Zinc fingers C2H2-type	7627	ENSG00000162086	0.209798	0.439891	0.126042	0.865486	0.150586	0.764269
GCGGTCAGTCATATGCATCAAGCC	TRCN0000466383	LURAP1L	leucine rich adaptor protein 1 like		286343	ENSG00000153714	-0.0736003	0.818336	0.0446014	0.935738	0.131654	0.80424
ATCACAGACGATGAGCTCGGCGGG	TRCN0000466384	NFYB	nuclear transcription factor Y subunit beta		4801	ENSG00000120837	-0.279523	0.194683	-0.451282	0.072115	-0.460863	0.0617946
CTTCCCTGGATGTTGGCCAAGCCC	TRCN0000466385	QSOX1	quiescin sulfhydryl oxidase 1		5768	ENSG00000116260	-0.123088	0.853603	-0.00530389	0.995968	0.0135789	0.993397
TGGGCATATTGCTTGCTGACCTTC	TRCN0000466386	FAM126B	family with sequence similarity 126 member B	PI4KA lipid kinase complex	285172	ENSG00000155744	-0.124119	0.761273	0.0375752	0.967007	-0.100011	0.901904
ATCGCCAACAATTATACGAACAAC	TRCN0000487977	MMP28	matrix metallopeptidase 28	M10 matrix metallopeptidases	79148	ENSG00000271447	0.038162	0.928261	0.0571105	0.936805	-0.0159311	0.987165
CTCATTATCTAAGCCTCTACTTTC	TRCN0000466388	MMP28	matrix metallopeptidase 28	M10 matrix metallopeptidases	79148	ENSG00000271447	-0.223294	0.50259	-0.0559812	0.954862	-0.0823301	0.912702
AAGCCATGTCATCTTGGAAATTCA	TRCN0000466389	GTPBP3	GTP binding protein 3, mitochondrial		84705	ENSG00000130299	-0.0187402	0.983991	0.069613	0.976403	0.0444822	0.98795
AACCCTTGGCCCGCGGGCGGTGGA	TRCN0000466434	GTPBP3	GTP binding protein 3, mitochondrial		84705	ENSG00000130299	0.0576805	0.915079	0.206714	0.797045	0.0619064	0.943706
AAGGCTTGCCAACCGTAACATTCA	TRCN0000466390	MFGE8	milk fat globule-EGF factor 8 protein		4240	ENSG00000140545	0.178917	0.638044	0.31654	0.559967	0.19886	0.73849
ACACCCCTGGCTGACGACTGACCT	TRCN0000466391	CST9L	cystatin 9 like	Cystatins, type 2	128821	ENSG00000101435	0.00541461	0.988163	0.165468	0.804579	-0.00738842	0.994212
AACCAAAGCCTGTCAGTGAGCACC	TRCN0000466393	PIMREG	PICALM interacting mitotic regulator		54478	ENSG00000129195	0.101951	0.769169	0.120798	0.855068	0.0726075	0.903819
TATATTGGGTATTTTGACCGTTTA	TRCN0000466411	PIMREG	PICALM interacting mitotic regulator		54478	ENSG00000129195	-0.0191768	0.965992	0.125863	0.825506	0.00193234	0.996735
GCCCACTACAACATAGGCCAAATC	TRCN0000466394	TRMU	tRNA 5-methylaminomethyl-2-thiouridylate methyltransferase		55687	ENSG00000100416	0.0185075	0.969937	-0.0736833	0.939028	0.0632228	0.930116
ACACTTCCGAAAATTGCCGAATAG	TRCN0000466395	RPL18A	ribosomal protein L18a	L ribosomal proteins	6142	ENSG00000105640	-0.170561	0.570885	0.0334374	0.969338	-0.204886	0.63424
TAATATTCTTGAAAAAACGAAAGC	TRCN0000466396	NPBWR2	neuropeptides B and W receptor 2	Neuropeptide receptors	2832	ENSG00000125522	0.0824403	0.816531	0.194759	0.633524	0.194629	0.532944
CGGGACGCTCTCCGCCACCACAGT	TRCN0000489216	NPBWR2	neuropeptides B and W receptor 2	Neuropeptide receptors	2832	ENSG00000125522	-0.322903	0.0472367	-0.309623	0.138534	-0.314149	0.200027
CGGCTAGCAAGAATTCCCAAACTC	TRCN0000488179	NPBWR2	neuropeptides B and W receptor 2	Neuropeptide receptors	2832	ENSG00000125522	-0.165477	0.396821	-0.087169	0.895947	-0.125606	0.763588
GTTCGTCACACACCGTAAATGCGG	TRCN0000469224	NPBWR2	neuropeptides B and W receptor 2	Neuropeptide receptors	2832	ENSG00000125522	0.219005	0.385699	0.144144	0.852359	0.142135	0.76598
ATATTAAAGGTTTTTGACCAAATC	TRCN0000466398	NR2C2AP	nuclear receptor 2C2 associated protein		126382	ENSG00000184162	0.183791	0.549324	0.317249	0.428977	0.26059	0.52388
CACGCAGTGAAGCGAACATACAAT	TRCN0000466399	MTPN	myotrophin	Ankyrin repeat domain containing	136319	ENSG00000105887	-0.222466	0.347214	-0.131417	0.838654	-0.11778	0.777888
TCTAAACTATTATTTGGAAGCCAC	TRCN0000487790	LFNG	LFNG O-fucosylpeptide 3-beta-N-acetylglucosaminyltransferase	Beta 3-glycosyltransferases	3955	ENSG00000106003	0.0809632	0.82734	0.164107	0.734703	0.201633	0.571882
ACTGGCATTTTCCAACAGAGTCGT	TRCN0000466400	LFNG	LFNG O-fucosylpeptide 3-beta-N-acetylglucosaminyltransferase	Beta 3-glycosyltransferases	3955	ENSG00000106003	0.0601404	0.842991	0.0127574	0.981213	0.0762452	0.898053
TCATGCTGCGCCGTGGGACTGTGA	TRCN0000466401	MRTO4	MRT4 homolog, ribosome maturation factor		51154	ENSG00000053372	-0.0957959	0.802245	0.0320367	0.96718	-0.00920836	0.992822
CGCATTGTGCCTACTAGATGATTT	TRCN0000466402	NAV1	neuron navigator 1		89796	ENSG00000134369	-0.162455	0.878934	-0.245451	0.934084	-0.428136	0.747711
ACCTCCATATTTTCATCACTCAGG	TRCN0000466403	PENK	proenkephalin	Endogenous ligands	5179	ENSG00000181195	-0.181709	NA	-0.0441352	NA	-0.065946	NA
CGGCTCATCTACCAGAGCAAAGTC	TRCN0000466404	NYAP2	neuronal tyrosine-phosphorylated phosphoinositide-3-kinase adaptor 2		57624	ENSG00000144460	-0.257976	0.12198	-0.191649	0.502203	-0.0959212	0.817404
TTCCAGACAACGAGTTTCTTCGCT	TRCN0000492221	LYPD2	LY6/PLAUR domain containing 2	LY6/PLAUR domain containing	137797	ENSG00000197353	0.0319785	0.912966	0.0507241	0.920612	0.0898658	0.823243
ACCATATGAGGTGATTGCTCGCAG	TRCN0000466405	LYPD2	LY6/PLAUR domain containing 2	LY6/PLAUR domain containing	137797	ENSG00000197353	-0.0607628	0.81795	-0.0490718	0.938673	-0.0504059	0.907508
CACCGCCTGACGTTCTTTGTTAAC	TRCN0000466407	FYB1	FYN binding protein 1		2533	ENSG00000082074	-0.228323	0.708493	0.222855	0.930398	-0.0753491	0.962615
CATAACCCCACGATCCTAGGATCT	TRCN0000466409	CLCNKB	chloride voltage-gated channel Kb	Chloride voltage-gated channels	1188	ENSG00000184908	NA	NA	NA	NA	0.0297686	NA
AGAACAACCTTTAAGGACCCCTCA	TRCN0000466410	FAM171B	family with sequence similarity 171 member B		165215	ENSG00000144369	NA	NA	0.0501103	NA	NA	NA
AAACCCCAGAACTGAAAACCACAG	TRCN0000466412	COPZ1	coatomer protein complex subunit zeta 1		22818	ENSG00000111481	0.0635149	0.885581	0.173233	0.846586	0.0678283	0.921296
ACACGCGACTGCCCACTGGCATTA	TRCN0000466414	LPCAT2	lysophosphatidylcholine acyltransferase 2	1-acylglycerol-3-phosphate O-acyltransferases|EF-hand domain containing	54947	ENSG00000087253	0.0554005	0.870303	0.0455002	0.947777	0.0586428	0.922565
GCTTAATCACGATCCCCAGTTCGC	TRCN0000466417	RABGGTB	Rab geranylgeranyltransferase subunit beta		5876	ENSG00000137955	0.139537	0.894819	-0.00421751	0.997005	0.239584	0.897574
ACAACTCCCGTATCTCCTGCTAAG	TRCN0000466418	ETFRF1	electron transfer flavoprotein regulatory factor 1	LYR motif containing	144363	ENSG00000205707	-0.0501943	0.899595	0.0714247	0.928374	0.0451497	0.958275
TAAAGTGCATACCCCAACCCCCTG	TRCN0000466419	ADAM33	ADAM metallopeptidase domain 33	ADAM metallopeptidase domain containing	80332	ENSG00000149451	-0.0213667	0.949337	-0.0806691	0.884859	0.0491269	0.923732
GCAATCTAATCTTAACTCCGACAA	TRCN0000466420	ZNF333	zinc finger protein 333	Zinc fingers C2H2-type	84449	ENSG00000160961	0.0255937	0.948984	0.110276	0.885338	0.171066	0.728751
CCCCGTCTTACGAGATCGTCTTTT	TRCN0000468683	ZNF333	zinc finger protein 333	Zinc fingers C2H2-type	84449	ENSG00000160961	-0.0685508	0.94303	0.0501549	0.984369	-0.159541	0.925627
CACAAGGAGCGTGCCTGTATGTTT	TRCN0000466422	RASGEF1A	RasGEF domain family member 1A		221002	ENSG00000198915	0.0500682	0.924227	-0.173925	0.872975	0.143079	0.862393
AACTCACGTGGACCACTCCTAGTT	TRCN0000466423	UQCC2	ubiquinol-cytochrome c reductase complex assembly factor 2	Mitochondrial respiratory chain complex assembly factors	84300	ENSG00000137288	0.0816401	0.855808	0.138398	0.854322	0.220858	0.67373
CCACTCATTTAACGTTGCCGGTAC	TRCN0000466424	MSRB1	methionine sulfoxide reductase B1	Selenoproteins	51734	ENSG00000198736	-0.125747	0.584644	-0.0802633	0.90445	-0.137586	0.711251
CCTCTTCTTTCCCTTTGTGTTTTG	TRCN0000469274	ING3	inhibitor of growth family member 3	PHD finger proteins	54556	ENSG00000071243	-0.0183812	0.973974	0.0973632	0.908787	-0.00424016	0.996478
TGGAGAAAAACCACCTATAAAAAA	TRCN0000466426	ING3	inhibitor of growth family member 3	PHD finger proteins	54556	ENSG00000071243	-0.157497	0.592981	-0.08343	0.932214	-0.0628318	0.929888
CGCTCATCACTAGCCCGGCCCGTT	TRCN0000470090	MYH7	myosin heavy chain 7	Myosin heavy chains	4625	ENSG00000092054	-0.141979	0.723341	-0.298718	0.564376	-0.174976	0.783683
GTATGGACTATCGCGATATGCGCC	TRCN0000466427	MYH7	myosin heavy chain 7	Myosin heavy chains	4625	ENSG00000092054	0.0564814	0.953441	-0.0179805	0.994487	0.156475	0.921279
TCGGCCCCACTTCGGGATTGCTTT	TRCN0000466428	ZSCAN29	zinc finger and SCAN domain containing 29	Zinc fingers C2H2-type|SCAN domain containing	146050	ENSG00000140265	0.0816462	NA	0.0143287	NA	-0.00640728	NA
GAGGTTACATCCTCATACAAACTT	TRCN0000466429	CD79A	CD79a molecule	CD molecules|V-set domain containing	973	ENSG00000105369	0.314502	0.306735	0.084232	0.919994	0.219371	0.686686
AGCAGCAGATACCCGAAGAAGGCT	TRCN0000466430	DNAJC3	DnaJ heat shock protein family (Hsp40) member C3	DNAJ (HSP40) heat shock proteins|Tetratricopeptide repeat domain containing	5611	ENSG00000102580	-0.129422	0.772714	-0.297006	0.700983	-0.168401	0.786172
AGCCACGAGTTGTGGCAACGTAGG	TRCN0000471300	DNAJC3	DnaJ heat shock protein family (Hsp40) member C3	DNAJ (HSP40) heat shock proteins|Tetratricopeptide repeat domain containing	5611	ENSG00000102580	0.0972707	0.921958	0.0308407	0.992683	0.130486	0.945434
CCGTTCGTGAGCCTCGAGTCACGG	TRCN0000466432	SEMA4A	semaphorin 4A	Semaphorins	64218	ENSG00000196189	-0.326098	0.625964	-0.38706	0.825502	-0.0816099	0.967779
GCAACTTACGGCCTCTTTCCACTC	TRCN0000466433	MARVELD3	MARVEL domain containing 3	MARVEL domain containing	91862	ENSG00000140832	-0.190729	0.657711	-0.252024	0.799398	-0.306322	0.580749
ATATCCCCTTTTAAAGCCCAGTTA	TRCN0000466435	DRD5	dopamine receptor D5	Dopamine receptors	1816	ENSG00000169676	0.270907	0.414539	0.133726	0.869873	0.254729	0.537972
CGCTTTAAAGTAAAAGGAGCCCAA	TRCN0000489035	DRD5	dopamine receptor D5	Dopamine receptors	1816	ENSG00000169676	0.0265858	0.946807	-0.0437712	0.960664	-0.0694059	0.920219
GGCTTAATATTGTCGCTGGGTAGC	TRCN0000488130	DRD5	dopamine receptor D5	Dopamine receptors	1816	ENSG00000169676	0.0743619	0.821808	0.160226	0.768128	0.0228685	0.976241
TCACCGGCGCTGAAATTCTATTTA	TRCN0000466436	CS	citrate synthase		1431	ENSG00000062485	-0.059596	0.896926	-0.117746	0.918543	0.0362456	0.961055
CCTGCACCAAGGGATGACACCCGC	TRCN0000478262	CS	citrate synthase		1431	ENSG00000062485	-0.124584	0.907983	-0.103529	0.968489	-0.0888276	0.969516
GGCACCAGGAAACTAGGGGTGTGT	TRCN0000466437	TUBA1B	tubulin alpha 1b	Tubulins	10376	ENSG00000123416	-0.139421	0.460298	0.207114	0.460387	-0.0136394	0.986723
TTCTGAAATAAGACACGCCGGGCA	TRCN0000472335	TUBA1B	tubulin alpha 1b	Tubulins	10376	ENSG00000123416	0.100196	0.78167	0.0753772	0.918263	0.0607163	0.928012
CACCGTCGAGGCCGCTGTATAAGA	TRCN0000467476	TUBA1B	tubulin alpha 1b	Tubulins	10376	ENSG00000123416	-0.0121484	0.98027	-0.075897	0.940444	-0.0446851	0.962443
TGGGCAGAAAGGATGCTTCTAAAC	TRCN0000488438	CDK18	cyclin dependent kinase 18	Cyclin dependent kinases	5129	ENSG00000117266	-0.286875	0.602811	-0.124479	0.964561	-0.475824	0.536588
ATTCAGTCAAGCCTAAACTATCTA	TRCN0000467401	CDK18	cyclin dependent kinase 18	Cyclin dependent kinases	5129	ENSG00000117266	0.0169974	0.988473	0.179139	0.955366	-0.072835	0.977098
GGCGACGAAAAACCGGATATGAGT	TRCN0000491649	CDK18	cyclin dependent kinase 18	Cyclin dependent kinases	5129	ENSG00000117266	-0.261215	0.739563	-0.383826	0.82361	-0.342038	0.759852
TTTGATTTCATTTCTTTCGAACAA	TRCN0000466439	CDK18	cyclin dependent kinase 18	Cyclin dependent kinases	5129	ENSG00000117266	0.184026	0.81769	-0.0196741	0.994487	0.0943029	0.964417
TACTAAGGAGAGATAGGTAGTATC	TRCN0000466441	AK4	adenylate kinase 4	Adenylate kinases	205	ENSG00000162433	-0.00622475	0.993247	0.183205	0.846586	0.00355291	0.99665
AGTAAGTGTGAGCCGGGCCCGCTC	TRCN0000469806	AK4	adenylate kinase 4	Adenylate kinases	205	ENSG00000162433	0.220327	0.459603	0.0434373	0.959913	-0.00553433	0.995382
TTTGTTGTGGCTTAATTGTGCCGC	TRCN0000488411	AK4	adenylate kinase 4	Adenylate kinases	205	ENSG00000162433	0.15148	0.74243	0.416194	0.445361	0.270295	0.625926
AATCGTATCATCACATTTATCATT	TRCN0000467157	AK4	adenylate kinase 4	Adenylate kinases	205	ENSG00000162433	0.419412	0.135364	0.269969	0.685766	0.553368	0.0400182
TGTGCGCACATTTCCTGATTCGTT	TRCN0000474202	AK4	adenylate kinase 4	Adenylate kinases	205	ENSG00000162433	-0.0883288	0.812973	-0.0931842	0.88845	-0.12114	0.795251
AGCCTGAGTACTTAGTACGGATTA	TRCN0000472664	AK4	adenylate kinase 4	Adenylate kinases	205	ENSG00000162433	-0.0524373	0.906255	-0.0662015	0.944805	-0.148782	0.784943
TGCCTCAGGCCCAATTCCCCTACA	TRCN0000488457	AK4	adenylate kinase 4	Adenylate kinases	205	ENSG00000162433	-0.0164333	0.97873	-0.0725235	0.960451	0.132069	0.878421
ACTGTCCGAGGTTGTACACATTTT	TRCN0000466442	UGGT2	UDP-glucose glycoprotein glucosyltransferase 2	UDP-glucose glycoprotein glucosyltransferases	55757	ENSG00000102595	0.133656	0.6968	0.152069	0.834492	0.16803	0.689014
TAATAACCCCAAAGGATCTAATCC	TRCN0000468570	UGGT2	UDP-glucose glycoprotein glucosyltransferase 2	UDP-glucose glycoprotein glucosyltransferases	55757	ENSG00000102595	-0.00182678	0.996554	0.0886067	0.860819	0.100635	0.814026
ACGAAGTCACGAAAACGCAACGCC	TRCN0000466443	EPHX4	epoxide hydrolase 4	Abhydrolase domain containing	253152	ENSG00000172031	0.0951068	0.843557	-0.0215408	0.987344	-0.133572	0.862034
ACTATGTCCATGACTCATCATCGT	TRCN0000466444	L3HYPDH	trans-L-3-hydroxyproline dehydratase		112849	ENSG00000126790	0.0952119	0.761613	0.144767	0.812947	0.138584	0.786226
TCTTTACTTTACGTCATCATTACA	TRCN0000466446	RPS6KA5	ribosomal protein S6 kinase A5	Mitogen-activated protein kinase-activated protein kinases|AGC family kinases	9252	ENSG00000100784	0.0996673	0.921576	0.192546	0.937543	0.345934	0.790935
TACACAATAACACTCCCGACAATC	TRCN0000480681	RPS6KA5	ribosomal protein S6 kinase A5	Mitogen-activated protein kinase-activated protein kinases|AGC family kinases	9252	ENSG00000100784	-0.187045	0.724645	-0.224276	0.90179	-0.0168843	0.992648
TAGTGGCTGCGCGCGAACTGTACT	TRCN0000466448	SLC25A51	solute carrier family 25 member 51	Solute carriers	92014	ENSG00000122696	-0.0441932	0.861137	-0.0369725	0.953818	-0.0597761	0.887024
TAGGAACGATCGATGTACGAGGCA	TRCN0000470593	SLC25A51	solute carrier family 25 member 51	Solute carriers	92014	ENSG00000122696	-0.192083	0.532163	-0.170798	0.820676	-0.0791153	0.916423
CCCATGTGCTCCACTGGGACTGCC	TRCN0000479542	SLC25A51	solute carrier family 25 member 51	Solute carriers	92014	ENSG00000122696	-0.214664	0.178436	-0.121268	0.791924	-0.11317	0.69377
TTAATAGTTGTAGCCACCCTTCGC	TRCN0000466449	LINC00895	long intergenic non-protein coding RNA 895		150185	ENSG00000281548	0.086194	0.665159	0.168512	0.550928	0.102559	0.722517
CCACAAACCCTCTGGAGTAGCACA	TRCN0000466450	ANO4	anoctamin 4	Anoctamins	121601	ENSG00000151572	-0.0102212	0.988165	-0.0583424	0.973216	0.0518264	0.963467
CGTTCTAAGCAATTTTCCATACAT	TRCN0000466452	GRHL3	grainyhead like transcription factor 3		57822	ENSG00000158055	-0.0621429	NA	-0.000893807	NA	-0.0796936	NA
AAAATTTTCTGTCCTGACGAACGA	TRCN0000466453	PLP1	proteolipid protein 1		5354	ENSG00000123560	0.0516092	NA	0.0433814	NA	NA	NA
TCACCCCCGGCTCTAACTCCCCCA	TRCN0000466454	TMEM140	transmembrane protein 140		55281	ENSG00000146859	-0.045038	0.890079	0.0206232	0.97545	-0.0119602	0.990199
TCTTTCTTTGGGTTTCAATTTTCG	TRCN0000466455	C1orf35	chromosome 1 open reading frame 35		79169	ENSG00000143793	0.111778	0.81992	0.217679	0.771932	0.160537	0.798642
ATAAGGACCTATTCCTGCGACAGC	TRCN0000466456	LYZ	lysozyme	Lysozymes, c-type	4069	ENSG00000090382	0.215256	0.740128	0.154061	0.950623	0.0298811	0.992648
AACTACTTCACAGAAGCTGCCCAC	TRCN0000466457	S100PBP	S100P binding protein		64766	ENSG00000116497	0.189995	0.614083	0.104728	0.909996	0.168505	0.778007
TCTGAAACATAATAAAATAAAGTG	TRCN0000466458	DEFA5	defensin alpha 5	Defensins, alpha	1670	ENSG00000164816	-0.00477515	0.994392	-0.234487	0.711869	0.0273524	0.97512
CAATTACAGAATAACGTAGCTAAC	TRCN0000466460	KLHL23	kelch like family member 23	Kelch like|BTB domain containing	151230	ENSG00000213160	-0.458198	0.259558	-0.145006	0.954047	-0.259189	0.809504
ATGATATAAATTGCTGTAGTTGTT	TRCN0000466461	GSDMB	gasdermin B	Gasdermins	55876	ENSG00000073605	0.462068	0.204381	0.229128	0.91663	0.357064	0.626344
GCTACCTTGAACTAATTTCCGACC	TRCN0000466462	ELOF1	elongation factor 1 homolog		84337	ENSG00000130165	-0.0339069	0.952554	0.144356	0.844088	0.205275	0.640205
TGAAACAATCAAACCGGCTCGCCA	TRCN0000466464	RUSC1	RUN and SH3 domain containing 1		23623	ENSG00000160753	-0.188233	0.505941	-0.133591	0.862779	-0.254591	0.579198
GAAGCCTCCCAGCCAACGATTCGG	TRCN0000466465	MDFI	MyoD family inhibitor		4188	ENSG00000112559	0.00354475	0.994546	0.0492642	0.967748	0.0225408	0.984138
GTCGAGCAATGCAAGTCAGTGTAT	TRCN0000466466	PSMB5	proteasome subunit beta 5	Proteasome	5693	ENSG00000100804	-0.000703621	0.99697	0.106328	0.873419	0.129469	0.800982
AACCGACTCCAGTGATCTGTTGTC	TRCN0000478847	PSMB5	proteasome subunit beta 5	Proteasome	5693	ENSG00000100804	0.0549092	0.848941	0.126041	0.819734	0.174967	0.596569
CATCATTCGCCTCTATCAACAATA	TRCN0000471555	ZNRD1	zinc ribbon domain containing 1		30834	ENSG00000066379	-0.00543982	0.99212	0.0507986	0.949462	-0.0499143	0.955732
CGAAAGTAAATCCTGTTAATTAAT	TRCN0000466467	ZNRD1	zinc ribbon domain containing 1		30834	ENSG00000066379	-0.111555	0.818923	-0.22653	0.739048	-0.00570016	0.995406
CTGTGTCCCTAGTTCAGGGCGGGA	TRCN0000466469	DUOX1	dual oxidase 1	EF-hand domain containing	53905	ENSG00000137857	-0.0101133	0.983842	0.0493519	0.946074	0.0136031	0.98305
ATGAACCTACGTTAATCAGAACAT	TRCN0000466471	SYCN	syncollin		342898	ENSG00000179751	0.164646	0.540745	0.157913	0.794917	0.218157	0.599948
CAACTCCTCAGCCCCTTTCTGTTA	TRCN0000474624	MAATS1	MYCBP associated and testis expressed 1		89876	ENSG00000183833	-0.0373772	0.952863	-0.118038	0.911123	0.200401	0.748734
ATTCCGTGTCGAAGTCTTCGCCTG	TRCN0000466472	MAATS1	MYCBP associated and testis expressed 1		89876	ENSG00000183833	0.0949844	0.921958	0.0288545	0.992912	-0.0640149	0.978183
CCTCCGAACACCAGAGGGGATAGC	TRCN0000466473	RNF130	ring finger protein 130	Ring finger proteins	55819	ENSG00000113269	0.132034	0.880342	0.441434	0.743035	0.0267482	0.992648
GATGTACTTGATTATTTGTGTAAA	TRCN0000477021	RNF130	ring finger protein 130	Ring finger proteins	55819	ENSG00000113269	0.205576	0.276115	0.198628	0.612216	0.128741	0.736417
GGTTATCGTATTAGTCCACTGGGC	TRCN0000466474	PQLC2L	PQ loop repeat containing 2 like		152078	ENSG00000174899	0.168191	0.540614	0.0124924	0.984701	0.160651	0.699226
AGGGGTTTGCTCTTCAAAACCCAT	TRCN0000466476	PNPLA8	patatin like phospholipase domain containing 8	Patatin like phospholipase domain containing	50640	ENSG00000135241	0.386506	0.589889	-0.22851	0.946121	0.00102809	0.99979
CGGGTTCTATGTGGTGATGTTCCT	TRCN0000488764	SLC52A2	solute carrier family 52 member 2	Solute carriers	79581	ENSG00000185803	-0.24053	0.61312	-0.479717	0.511801	-0.340596	0.620356
GTATGCTAAACCCCGGAGGACATT	TRCN0000489152	SLC52A2	solute carrier family 52 member 2	Solute carriers	79581	ENSG00000185803	-0.00591535	0.993197	-0.115628	0.953804	-0.0947828	0.948943
ATCGGAGGAATCCGAACGGGGTTG	TRCN0000466478	SLC52A2	solute carrier family 52 member 2	Solute carriers	79581	ENSG00000185803	0.124038	0.904803	0.0778985	0.976403	0.0463417	0.98843
TATGCTCGCCCTCGCGTCCTGGCA	TRCN0000466479	ZSCAN32	zinc finger and SCAN domain containing 32	Zinc fingers C2H2-type|SCAN domain containing	54925	ENSG00000140987	0.103015	0.794496	0.11749	0.872727	0.0759261	0.913746
TCTCATGTGCTTTGCTCCACACAT	TRCN0000466481	NEK9	NIMA related kinase 9		91754	ENSG00000119638	0.204566	0.81729	0.338852	0.893838	0.114183	0.955961
CTGGCTGCCAGCGCATTTACCTTT	TRCN0000466482	STRADB	STE20-related kinase adaptor beta		55437	ENSG00000082146	0.00938586	0.984593	0.0504202	0.953912	0.0437687	0.96408
CGACCGGTTCTTATGCTTCATGCA	TRCN0000480011	STRADB	STE20-related kinase adaptor beta		55437	ENSG00000082146	-0.34962	0.221453	-0.125542	0.90974	-0.312361	0.47314
CTCATACCTGATAGCGCAGGAGCC	TRCN0000488545	STRADB	STE20-related kinase adaptor beta		55437	ENSG00000082146	-0.122271	0.831264	-0.0909611	0.945108	-0.0349378	0.980346
GGGCTCAGCGAAGGCACAAATGGC	TRCN0000488001	STRADB	STE20-related kinase adaptor beta		55437	ENSG00000082146	-0.144308	0.74486	-0.391755	0.411634	0.0579949	0.938952
GGAACTTTCTGTAGTTCGAACAGC	TRCN0000466483	ZNF124	zinc finger protein 124	Zinc fingers C2H2-type	7678	ENSG00000196418	0.0244786	0.966547	-0.0965633	0.912367	0.00335533	0.9964
CAATGCAGAGAGTCTTCGACTCCA	TRCN0000480229	PIP5KL1	phosphatidylinositol-4-phosphate 5-kinase like 1		138429	ENSG00000167103	-0.349635	0.502929	0.126038	0.958329	0.0843581	0.962271
TAAAACAGTGGTCAGGCCGCTACT	TRCN0000466485	PIP5KL1	phosphatidylinositol-4-phosphate 5-kinase like 1		138429	ENSG00000167103	0.0441887	0.9397	0.0719313	0.944005	0.0462294	0.964389
ACCGAGTCCGAATAGTTTATTCAG	TRCN0000466486	HOOK1	hook microtubule tethering protein 1		51361	ENSG00000134709	0.049741	0.954108	-0.0730404	0.968489	0.123102	0.93182
CCAGTCCTCGGCGCACGAATAGGT	TRCN0000466487	ERF	ETS2 repressor factor	ETS transcription factor family	2077	ENSG00000105722	-0.215947	0.564006	-0.378565	0.532986	-0.389276	0.34221
TCGGGCATGCTATAACTGGACCTG	TRCN0000474312	TPM3	tropomyosin 3	Tropomyosins	7170	ENSG00000143549	0.0063809	0.984358	-0.0499062	0.953148	-0.0627422	0.914762
TTGCCATGATGAACCCCCTTACCA	TRCN0000467014	TPM3	tropomyosin 3	Tropomyosins	7170	ENSG00000143549	0.0240032	0.970071	0.12271	0.907986	-0.00385479	0.99749
CAACCCTTACTTATGAATACCCCC	TRCN0000473724	TPM3	tropomyosin 3	Tropomyosins	7170	ENSG00000143549	-0.132081	0.597432	-0.107302	0.889624	-0.0732035	0.900979
ACAATCCGGTTACCCTTTTAGTAG	TRCN0000466488	TPM3	tropomyosin 3	Tropomyosins	7170	ENSG00000143549	-0.0650574	0.953286	-0.449516	0.790252	-0.0793314	0.97629
ATCGATTAACGGACTCTAGCACCC	TRCN0000466489	TMEM213	transmembrane protein 213		155006	ENSG00000214128	0.21519	0.327523	0.15164	0.806713	0.050332	0.930879
CTCGGAACTCAATCTCAAAGCTCA	TRCN0000466491	FGF9	fibroblast growth factor 9	Endogenous ligands	2254	ENSG00000102678	-0.136037	0.72683	-0.110025	0.889252	0.0481896	0.961986
ACCCGATTGCCGCGCTTACCGGAA	TRCN0000466492	WWC2-AS2	WWC2 antisense RNA 2		152641	ENSG00000251359	-0.132836	0.729977	-0.126414	0.899406	-0.302228	0.55004
AGGATTCGATTCTACTGTTAGTTG	TRCN0000466493	UBXN4	UBX domain protein 4	UBX domain containing	23190	ENSG00000144224	-0.0298066	NA	0.019828	NA	0.251365	0.9308
ATCCCGCCTCGGCCAGTAGTTGTC	TRCN0000466494	HP1BP3	heterochromatin protein 1 binding protein 3		50809	ENSG00000127483	0.163808	0.876844	-0.230581	0.945914	0.0208575	0.993333
TGTTAGCCCTAACAGGCATTAGTT	TRCN0000475906	HP1BP3	heterochromatin protein 1 binding protein 3		50809	ENSG00000127483	0.021908	0.959459	-0.0861935	0.918543	-0.0109435	0.99017
TAGCATGCCGCTCCATGATTCCGC	TRCN0000466495	FNBP4	formin binding protein 4		23360	ENSG00000109920	-0.00766862	0.994356	0.0710429	0.984319	0.211783	0.907306
TATCAAAGGCAAACAAACCAATGG	TRCN0000466496	MMADHC	metabolism of cobalamin associated D		27249	ENSG00000168288	-0.137791	0.671087	0.0202786	0.981575	0.060354	0.926149
GGTTATACTAAGCCATAAATGTTA	TRCN0000466497	TRMT61A	tRNA methyltransferase 61A	tRNA methyltransferases	115708	ENSG00000166166	-0.0454248	0.891583	0.0127955	0.97879	0.139911	0.637791
AATCAAACTGTCTCGATTCCGTCT	TRCN0000466502	GGA1	golgi associated, gamma adaptin ear containing, ARF binding protein 1	Golgi associated, gamma adaptin ear containing, ARF binding proteins	26088	ENSG00000100083	0.181603	0.842803	0.154066	0.959732	-0.0451544	0.988671
GATGCAACTGCTACGTAGTAGCCG	TRCN0000488875	EDNRA	endothelin receptor type A	Endothelin receptors	1909	ENSG00000151617	0.00939219	0.981726	0.126514	0.868379	0.0526291	0.948117
ACCAGGCTGACTGTGTCTCGATTC	TRCN0000488164	EDNRA	endothelin receptor type A	Endothelin receptors	1909	ENSG00000151617	-0.13767	0.839062	-0.186735	0.934759	-0.480161	0.433126
AGGAGAACGCCACAGTTCAACTCT	TRCN0000466503	EDNRA	endothelin receptor type A	Endothelin receptors	1909	ENSG00000151617	-0.124278	0.725137	-0.135739	0.856505	-0.135843	0.793557
TTTGTAATCTACCATTCTGTAAGG	TRCN0000489068	EDNRA	endothelin receptor type A	Endothelin receptors	1909	ENSG00000151617	0.0372045	0.938539	0.23364	0.672001	0.0505877	0.951757
AAACGGATAAGCGCACCTCGGTTA	TRCN0000479616	ZNF24	zinc finger protein 24	Zinc fingers C2H2-type|SCAN domain containing	7572	ENSG00000172466	0.195172	0.494482	0.261051	0.622593	0.152351	0.750847
TTTTGACTTAAGCCGATTCGACTT	TRCN0000466504	ZNF24	zinc finger protein 24	Zinc fingers C2H2-type|SCAN domain containing	7572	ENSG00000172466	0.355403	0.30966	0.230239	0.785222	0.0387678	0.987196
TTATACGCAAACTTCTCCTGACGA	TRCN0000466505	AP3S2	adaptor related protein complex 3 subunit sigma 2		10239	ENSG00000157823	-0.00750496	0.986978	0.0434081	0.949078	0.00414439	0.994177
GAGGCACAGCACATCGAATGCCCA	TRCN0000466506	HBG2	hemoglobin subunit gamma 2	Hemoglobin subunits	3048	ENSG00000196565	0.0538623	0.881239	0.0161809	0.981626	-0.0871549	0.902087
GCCCCCGCGTTCTCTAATCGAAAG	TRCN0000466508	EQTN	equatorin		54586	ENSG00000120160	-0.176893	0.656231	-0.138394	0.890274	-0.113329	0.887488
CAATCCCTTATATCTCACTTAATC	TRCN0000466509	XAGE2	X antigen family member 2		9502	ENSG00000155622	-0.0141839	0.974357	0.00307419	0.992088	0.0543263	0.933564
TCGAACCTCGATATGGATCACTAC	TRCN0000479423	XAGE2	X antigen family member 2		9502	ENSG00000155622	-0.0820428	0.749022	-0.0184354	0.98289	0.00700033	0.988544
AACAGGGACGATGTAACGGTATTA	TRCN0000466510	SLC40A1	solute carrier family 40 member 1	Solute carriers	30061	ENSG00000138449	-0.0188249	0.982676	-0.0137581	0.994487	-0.0217609	0.992648
TCGTCGATAGTCGTCTAGTCGCCC	TRCN0000466511	BCAT2	branched chain amino acid transaminase 2	Minor histocompatibility antigens	587	ENSG00000105552	0.110762	0.809989	0.068434	0.944477	-0.151505	0.817225
TCAAATGTGCCTGTTATATCTGGA	TRCN0000466877	FAM189B	family with sequence similarity 189 member B		10712	ENSG00000160767	-0.106316	0.834502	-0.15763	0.886446	-0.0993333	0.912801
GCGCAATGGTGTAATTGGTGGTTC	TRCN0000466512	FAM189B	family with sequence similarity 189 member B		10712	ENSG00000160767	-0.0282624	0.94035	-0.0264279	0.968912	0.0436389	0.931661
ACGTCTTATGCTTGCGTCTAAGTA	TRCN0000473498	FAM189B	family with sequence similarity 189 member B		10712	ENSG00000160767	0.157559	0.514464	0.0174841	0.982694	0.0563349	0.922829
AGCCAAAGACCAGCAATTGGGACC	TRCN0000471903	FAM189B	family with sequence similarity 189 member B		10712	ENSG00000160767	-0.181772	0.641068	-0.0978987	0.923581	-0.0598149	0.95322
ATACCTGTGGGGGCCGCTACCCTT	TRCN0000466514	LAMTOR4	late endosomal/lysosomal adaptor, MAPK and MTOR activator 4	Ragulator complex	389541	ENSG00000188186	0.106782	0.774045	0.0570927	0.945982	0.139762	0.779355
TTAGCCGATTTTAAACGTCAGTGT	TRCN0000466515	MTFP1	mitochondrial fission process 1		51537	ENSG00000242114	0.0343958	0.919793	0.00384131	0.9924	0.0455182	0.92547
TTCCGCCGGAATGGTGCTAATATG	TRCN0000472384	MTFP1	mitochondrial fission process 1		51537	ENSG00000242114	0.0588965	0.878927	0.13256	0.819561	-0.00282909	0.997132
ACCAAGCATCGGTGTTATTCTTCA	TRCN0000466516	PRSS30P	serine protease 30, pseudogene	Serine proteases	124221	ENSG00000172460	-0.154338	0.566275	-0.0526468	0.947359	-0.0537414	0.923376
GGGAATAGCATCGGTAATCCCTTC	TRCN0000466517	CCNC	cyclin C	Cyclins|Mediator complex	892	ENSG00000112237	0.0279169	0.979225	-0.108058	0.967412	-0.0024051	0.998486
TACCGCCCGCCTTCAAGTTCACAC	TRCN0000489139	CCNC	cyclin C	Cyclins|Mediator complex	892	ENSG00000112237	0.133409	0.885033	-0.279314	0.917316	0.238894	0.878389
AATATGTCTTCTCACAAGTCCCCT	TRCN0000492196	CCNC	cyclin C	Cyclins|Mediator complex	892	ENSG00000112237	0.429346	0.384011	0.102712	0.967882	0.222648	0.864311
TTGCGGCCCCGAAGGTAATCCTAC	TRCN0000481521	CCNC	cyclin C	Cyclins|Mediator complex	892	ENSG00000112237	-0.0184523	NA	0.00615129	NA	0.0340441	NA
AAGGCACCCCCTATCAGGACCTCT	TRCN0000466518	SHOC2	SHOC2, leucine rich repeat scaffold protein		8036	ENSG00000108061	0.324444	0.497255	0.0317216	0.989763	0.116763	0.944883
GAATACAAAACGATTCCCATACCA	TRCN0000466519	BIN2	bridging integrator 2	N-BAR domain containing	51411	ENSG00000110934	0.0194611	0.972107	0.234689	0.742794	0.227164	0.613502
ATACGCACAAGGAAGCCATGCTGT	TRCN0000466520	TTLL7	tubulin tyrosine ligase like 7	Tubulin tyrosine ligase family	79739	ENSG00000137941	0.0551023	0.920201	0.0579113	0.950052	0.098586	0.911526
CCATAGTTATCAATTCGAACCTTA	TRCN0000471057	TTLL7	tubulin tyrosine ligase like 7	Tubulin tyrosine ligase family	79739	ENSG00000137941	0.00892168	0.983122	0.0134158	0.985045	-0.12055	0.824523
GCGACGACTCTAACATCAAACGAC	TRCN0000466521	ZNF428	zinc finger protein 428	Zinc fingers C2H2-type	126299	ENSG00000131116	-0.293627	0.242205	-0.00397483	0.995385	-0.126568	0.82591
TAGTGTTCCCTCCATCTATCGAAG	TRCN0000466522	TMPRSS12	transmembrane serine protease 12	Serine proteases	283471	ENSG00000186452	0.0717709	0.852446	0.00117191	0.993155	-0.092932	0.899884
ATTTCTTGGATTTTTATCGGCCAC	TRCN0000466523	NUMB	NUMB, endocytic adaptor protein		8650	ENSG00000133961	0.317117	0.665603	0.0937274	0.973216	0.138842	0.948951
AACTCGAACCGCAACTACAAGGAA	TRCN0000489234	NUMB	NUMB, endocytic adaptor protein		8650	ENSG00000133961	-0.0245259	0.977756	0.0133709	0.995968	-0.189675	0.867196
GACTGGCGCTTGCTACGCGTTACG	TRCN0000474826	NUMB	NUMB, endocytic adaptor protein		8650	ENSG00000133961	0.157242	0.58519	0.0650139	0.926175	0.0130316	0.984364
CTGCATACTTAGTCTAAACTTGTC	TRCN0000491413	NUMB	NUMB, endocytic adaptor protein		8650	ENSG00000133961	-0.126408	0.74022	-0.126208	0.867555	-0.147834	0.754476
AATGGCTCTCTTGTCCGGCATGCA	TRCN0000489619	NUMB	NUMB, endocytic adaptor protein		8650	ENSG00000133961	0.154604	0.740016	0.192961	0.83974	-0.0280779	0.989287
ACCTGACCATGTGGGCGGTTTGAG	TRCN0000466525	ATP6V1C2	ATPase H+ transporting V1 subunit C2	V-type ATPases	245973	ENSG00000143882	0.0379507	0.938345	0.146167	0.860598	0.111115	0.876791
TATTTTCCCCCACATTCGAGTGTT	TRCN0000466526	KLK7	kallikrein related peptidase 7	Kallikreins|Serine proteases	5650	ENSG00000169035	0.0705063	0.863447	0.086321	0.931827	0.117446	0.841523
AAATGGTCGATGTCTCAGATACCC	TRCN0000489730	KLK7	kallikrein related peptidase 7	Kallikreins|Serine proteases	5650	ENSG00000169035	0.340573	0.19578	0.34304	0.39697	0.246383	0.58986
TCGTTAATGTCTATTGATGGGTTT	TRCN0000466527	DAO	D-amino acid oxidase		1610	ENSG00000110887	0.120776	0.766105	0.0712019	0.939201	-0.118126	0.908411
GCCGGTGACTGCATGTATGCTATT	TRCN0000466528	POMGNT2	protein O-linked mannose N-acetylglucosaminyltransferase 2 (beta 1,4-)	O-linked N-acetylglucosaminyltransferases	84892	ENSG00000144647	-0.135538	0.609575	-0.11988	0.87296	-0.125728	0.799898
CTAGACATACATGATGCGGCACCT	TRCN0000466530	ADORA2B	adenosine A2b receptor	Adenosine receptors	136	ENSG00000170425	-0.0476682	0.912729	0.0807227	0.900715	0.0308576	0.966151
AACCTCTGCTACATCAAACACCTG	TRCN0000489321	ADORA2B	adenosine A2b receptor	Adenosine receptors	136	ENSG00000170425	0.363074	0.15029	0.330686	0.460791	0.408641	0.199864
GCCCGGATTCGCGATTTCAGGGCG	TRCN0000488692	ADORA2B	adenosine A2b receptor	Adenosine receptors	136	ENSG00000170425	0.140144	0.563216	0.0452856	0.941265	0.0864349	0.905427
GTCACTGTGTGTTCAAAAGAATTA	TRCN0000466532	VRK2	VRK serine/threonine kinase 2		7444	ENSG00000028116	0.168504	0.793846	0.197539	0.93041	0.113277	0.94496
TCAGATCACACCCTGTTTGCAGGA	TRCN0000489903	VRK2	VRK serine/threonine kinase 2		7444	ENSG00000028116	0.037993	0.94154	-0.133537	0.90159	-0.096597	0.917654
TGAAGTCGAGCTTAGTCCGTATAA	TRCN0000488806	VRK2	VRK serine/threonine kinase 2		7444	ENSG00000028116	-0.304377	0.500143	-0.316451	0.817763	0.0114872	0.991292
GCGCATGGCTTCGAAATGATGGTG	TRCN0000466533	NUP35	nucleoporin 35	Nucleoporins	129401	ENSG00000163002	0.049545	0.939119	0.00745773	0.997484	0.176429	0.807824
ATAACTATCCTCTAGGATGTACCC	TRCN0000466535	IQCH	IQ motif containing H		64799	ENSG00000103599	0.159372	0.873369	-0.468148	0.814504	0.198388	0.930262
CAACTGTCTGTAAAGCGAATCGCG	TRCN0000469359	IQCH	IQ motif containing H		64799	ENSG00000103599	-0.08279	0.712901	-0.0516383	0.929711	-0.0373282	0.945545
CGATTGTCATTCGGCCGACTATTC	TRCN0000466536	HIST2H2AA3	histone cluster 2 H2A family member a3	Histones	8337	ENSG00000203812	-0.21676	0.26191	-0.105377	0.903789	-0.29888	0.259345
CTTGAACTGGACTCCCACCGCACC	TRCN0000473665	HIST2H2AA3	histone cluster 2 H2A family member a3	Histones	8337	ENSG00000203812	0.0374468	0.916448	0.124756	0.855208	-0.13103	0.770982
GGTCGAATGGTCGCATTAGATTCC	TRCN0000479809	HIST2H2AA3	histone cluster 2 H2A family member a3	Histones	8337	ENSG00000203812	-0.131818	0.509938	-0.208422	0.59185	-0.139604	0.652249
CCTTGTCTCTTTAGTTCCGGAATC	TRCN0000466537	HLA-B	major histocompatibility complex, class I, B	Histocompatibility complex|C1-set domain containing	3106	ENSG00000234745	0.0529946	0.871284	0.108424	0.893631	0.144019	0.767748
TAAATTATATAGCATATGCCCATT	TRCN0000466538	PSME1	proteasome activator subunit 1	Proteasome	5720	ENSG00000092010	0.16811	0.521843	0.180634	0.750889	0.105887	0.844032
TTTATGGTGTACGTAAATGCAATC	TRCN0000480695	PCDHGC3	protocadherin gamma subfamily C, 3	Clustered protocadherins	5098	ENSG00000240184	0.0909742	0.880205	0.191136	0.827527	0.15126	0.821224
CATGGTTCGGTAATGAAAGTTCCA	TRCN0000466539	PCDHGC3	protocadherin gamma subfamily C, 3	Clustered protocadherins	5098	ENSG00000240184	-0.163178	0.513426	-0.0847844	0.920632	-0.120577	0.800035
TAGACATGATCCAGACCTCCACCC	TRCN0000479955	PCDHGC3	protocadherin gamma subfamily C, 3	Clustered protocadherins	5098	ENSG00000240184	0.320451	0.705518	0.0875968	0.973216	0.173828	0.937308
GCCACGATGATCTTTTGGCCACAT	TRCN0000466540	TUBD1	tubulin delta 1	Tubulins	51174	ENSG00000108423	0.0246774	NA	0.0234298	NA	-0.00315286	NA
ACCCTTTCAGGCTTCGACCGAGTT	TRCN0000466541	TGFBRAP1	transforming growth factor beta receptor associated protein 1	CORVET complex	9392	ENSG00000135966	NA	NA	NA	NA	NA	NA
GAGATCCCGATCTCGGATACACAG	TRCN0000466542	GCKR	glucokinase regulator		2646	ENSG00000084734	0.123197	0.666975	0.0947061	0.893416	0.127036	0.810245
TTCTGTAACGCGAACGGGTCCGGC	TRCN0000466543	CCT7	chaperonin containing TCP1 subunit 7	Chaperonins	10574	ENSG00000135624	0.0454256	0.921689	0.178754	0.784072	0.0388317	0.963306
CGTCCGTTCGGGGGCACGCAGCCG	TRCN0000492210	IGF2BP3	insulin like growth factor 2 mRNA binding protein 3	RNA binding motif containing	10643	ENSG00000136231	-0.391174	0.51235	-0.281503	0.914312	-0.108343	0.955344
GCTTTGTCCAGGTGACGATCGGTT	TRCN0000466544	IGF2BP3	insulin like growth factor 2 mRNA binding protein 3	RNA binding motif containing	10643	ENSG00000136231	NA	NA	0.0546842	NA	0.0492121	NA
AATTCATCGCCTCCCAAGTTGATG	TRCN0000466545	ATP1A3	ATPase Na+/K+ transporting subunit alpha 3	ATPase Na+/K+ transporting subunits	478	ENSG00000105409	-0.0752985	0.950788	0.0886299	0.976403	0.0422196	0.992209
GGGGGATCTACGATATGACAGGCG	TRCN0000466546	SLC25A22	solute carrier family 25 member 22	Solute carriers	79751	ENSG00000177542	-0.133306	0.648278	0.17665	0.795685	0.0794029	0.887086
TGGCACAGAGCTTCTTTAACATAT	TRCN0000466547	TMEM263	transmembrane protein 263		90488	ENSG00000151135	-0.268834	0.378533	-0.103393	0.911762	-0.0579843	0.945968
CGAATCCACAATAGTACATGTCTA	TRCN0000466549	LINC00260	long intergenic non-protein coding RNA 260		84719		-0.215538	0.256542	-0.286823	0.284998	-0.203454	0.495983
TCCGAAGTCGGTAGATTGACGGCG	TRCN0000466550	PDIA4	protein disulfide isomerase family A member 4	Protein disulfide isomerases	9601	ENSG00000155660	0.0347813	0.948118	-0.01458	0.992918	-0.178433	0.746085
ATCAAAGATACCAGTGTTATTCCC	TRCN0000466551	GSDMC	gasdermin C	Gasdermins	56169	ENSG00000147697	0.0825953	0.9133	-0.02337	0.988665	0.203318	0.845776
ATTAACACGAAATTGTAACCAAGC	TRCN0000473727	GSDMC	gasdermin C	Gasdermins	56169	ENSG00000147697	0.160001	0.718063	0.208746	0.832251	0.237696	0.670091
GCATGGATTGACATTACGTGCCGT	TRCN0000489578	CLK2	CDC like kinase 2	CDC like kinases	1196	ENSG00000176444	-0.0574982	0.949936	0.0725306	0.972675	0.045548	0.984275
GCGTTAACGGCCATAGATCGCATC	TRCN0000466552	CLK2	CDC like kinase 2	CDC like kinases	1196	ENSG00000176444	-0.0197354	0.986191	-0.211872	0.947996	0.0123652	0.995042
TTGGACACTTTAGTTCTCCCGCAA	TRCN0000487839	CLK2	CDC like kinase 2	CDC like kinases	1196	ENSG00000176444	0.00919202	0.993823	0.104033	0.968489	0.442426	0.630271
TCCAGCGAGGTGGGTGCTCGCTAC	TRCN0000481442	CLK2	CDC like kinase 2	CDC like kinases	1196	ENSG00000176444	-0.270373	0.724111	-0.412271	0.892094	0.106289	0.962271
CTGGCTTCTTTATATCCTCAAACG	TRCN0000491251	CLK2	CDC like kinase 2	CDC like kinases	1196	ENSG00000176444	-0.0602203	0.952495	-0.184439	0.946121	-0.208171	0.888366
CTCACACACCATTGACACCAGAAT	TRCN0000489118	CLK2	CDC like kinase 2	CDC like kinases	1196	ENSG00000176444	-0.530058	0.169361	0.0406774	0.986001	-0.173077	0.898832
CTGCAGTTAGTACGTGCACGGGAA	TRCN0000480750	CLK2	CDC like kinase 2	CDC like kinases	1196	ENSG00000176444	-0.141583	0.869692	-0.289138	0.895466	-0.0885701	0.964927
GAGTTTATTAGCCGTTACTCGTAA	TRCN0000472087	CKB	creatine kinase B		1152	ENSG00000166165	-0.133581	0.885033	-0.0438429	0.987641	-0.0429453	0.989997
ATTACCCCGGTATACATAGAGACC	TRCN0000466553	CKB	creatine kinase B		1152	ENSG00000166165	0.33222	0.583314	-0.00688965	0.996072	0.27521	0.822322
TACGTTTATATTTTAAATCTTGAT	TRCN0000488413	CKB	creatine kinase B		1152	ENSG00000166165	0.224363	0.717215	-0.229692	0.923209	-0.0386062	0.988202
ATCATCCATTTTGTGAGGGCATGG	TRCN0000469112	CKB	creatine kinase B		1152	ENSG00000166165	0.0265514	NA	NA	NA	NA	NA
GCTTTTTGTCTTCCCTACTCACGT	TRCN0000466554	HIST1H2BD	histone cluster 1 H2B family member d	Histones	3017	ENSG00000158373	0.114619	0.788192	0.357159	0.368432	0.473743	0.13918
GCCTTGCACGCTAATAGATGGTAT	TRCN0000466555	ANKDD1A	ankyrin repeat and death domain containing 1A	Ankyrin repeat domain containing	348094	ENSG00000166839	0.0189428	0.982626	0.142427	0.953804	0.186549	0.859486
GAATAGCACAAAAGCATATTCCAT	TRCN0000466556	SYT2	synaptotagmin 2	Synaptotagmins	127833	ENSG00000143858	0.102923	0.87961	0.0953427	0.964449	0.315637	0.600251
GCGAAACTAATGCCATTTAAGAGA	TRCN0000466557	OXNAD1	oxidoreductase NAD binding domain containing 1		92106	ENSG00000154814	0.0418731	0.921563	0.0210599	0.976336	0.301461	0.309413
AATTATTACTCTATTTATGGACTT	TRCN0000466558	SNRNP40	small nuclear ribonucleoprotein U5 subunit 40	WD repeat domain containing|U5 small nucleolar ribonucleoprotein|Spliceosomal Bact complex|Spliceosomal C complex|Spliceosomal P complex	9410	ENSG00000060688	0.426885	0.173032	0.390651	0.454189	0.362795	0.416021
CCCCAAAAACTATTTTTTATTCCA	TRCN0000466559	TMEM86A	transmembrane protein 86A		144110	ENSG00000151117	-0.109444	0.715578	-0.0198057	0.982181	-0.178361	0.690174
GCACGCCCAACACTTTTACGTCTA	TRCN0000470200	LATS1	large tumor suppressor kinase 1	AGC family kinases	9113	ENSG00000131023	-0.16754	0.867755	-0.208092	0.950966	0.296926	0.897136
CAAGTTGGGTTCATTTCCAAGGGG	TRCN0000488803	LATS1	large tumor suppressor kinase 1	AGC family kinases	9113	ENSG00000131023	-0.357557	0.6646	0.227655	0.949781	0.320925	0.845028
AATTGTCACGAACTTAATCGTTTC	TRCN0000466560	LATS1	large tumor suppressor kinase 1	AGC family kinases	9113	ENSG00000131023	0.344832	0.190412	0.300316	0.569762	0.299556	0.474464
ACCGTGTACAGCAGCTCTCGGTAC	TRCN0000472788	LATS1	large tumor suppressor kinase 1	AGC family kinases	9113	ENSG00000131023	0.0401516	0.971029	0.149526	0.953254	0.139926	0.943257
CTGTTACGGCCGAGCGTTCAACTC	TRCN0000474530	NINJ1	ninjurin 1		4814	ENSG00000131669	-0.071102	0.883113	-0.167098	0.853967	-0.189659	0.721221
AGGAGTTACCTCAATTTCCTCCTG	TRCN0000466561	NINJ1	ninjurin 1		4814	ENSG00000131669	0.000743175	0.996804	-0.151467	0.886257	0.0320392	0.971309
AACCCGCAACATGCCCGGTGGTCA	TRCN0000492111	CPEB1	cytoplasmic polyadenylation element binding protein 1		64506	ENSG00000214575	0.121617	0.802859	0.254765	0.702373	0.221189	0.711149
CGTCACCCAGTGACCATTACTCCA	TRCN0000466562	CPEB1	cytoplasmic polyadenylation element binding protein 1		64506	ENSG00000214575	-0.104049	0.873368	0.237608	0.824408	0.331173	0.480144
AAAAGCTAGAACCGACAGCAAAGT	TRCN0000466564	BFSP1	beaded filament structural protein 1	Beaded filament structural proteins	631	ENSG00000125864	0.311884	0.623308	0.101223	0.968489	0.193099	0.927891
TATACCCAAGGGAGTGTTTATAAA	TRCN0000488735	NR2C1	nuclear receptor subfamily 2 group C member 1	Nuclear hormone receptors	7181	ENSG00000120798	-0.0302507	0.963351	0.160469	0.887212	-0.132071	0.88342
GTAGGGGTTCACCGAAATCTACAC	TRCN0000466565	NR2C1	nuclear receptor subfamily 2 group C member 1	Nuclear hormone receptors	7181	ENSG00000120798	0.021389	0.980323	-0.00168231	0.996414	0.0249246	0.992648
CAAGTCCCCCCTTACTAACGACAA	TRCN0000470195	MUM1	melanoma associated antigen (mutated) 1	PWWP domain containing	84939	ENSG00000160953	-0.0819796	0.845788	-0.0547254	0.957921	-0.0653708	0.933771
GTCTGCCCCAGAATGCTCCGCGGG	TRCN0000466566	MUM1	melanoma associated antigen (mutated) 1	PWWP domain containing	84939	ENSG00000160953	0.112325	0.712169	0.127729	0.849509	0.0893778	0.863612
AGTCAGCCGGAACTGAGACTAAGT	TRCN0000466567	NOP58	NOP58 ribonucleoprotein		51602	ENSG00000055044	-0.0110399	0.983443	0.0591519	0.942804	0.0649164	0.945128
ACCCCCCTGACCTATCATCCTATG	TRCN0000466568	C10orf88	chromosome 10 open reading frame 88		80007	ENSG00000119965	-0.0494218	0.948317	-0.0208459	0.99157	-0.0082347	0.994341
CGCCATGGTTCTGCCTACCCTTTA	TRCN0000466569	NRBF2	nuclear receptor binding factor 2	PIK3C3 complex subunits	29982	ENSG00000148572	-0.12498	0.678429	-0.130097	0.876482	0.0595479	0.934207
ACATGCAACAGAATATGGGCAGTC	TRCN0000466571	MOAP1	modulator of apoptosis 1	Paraneoplastic Ma antigens	64112	ENSG00000165943	-0.0571754	0.946271	0.149116	0.950623	0.0971504	0.954278
TTTACATGGTTTTCAGCCCCTTGA	TRCN0000466572	GMFB	glia maturation factor beta		2764	ENSG00000197045	0.264041	0.327212	0.244479	0.591177	0.187742	0.677059
TTGTGTATGCCTCTTGCCACGACC	TRCN0000466573	GAGE7	G antigen 7		2579		0.0249802	0.956505	0.0014855	0.991712	0.0174999	0.983117
GGAGAAAAACCTACATAAAGAACT	TRCN0000466574	FASTKD3	FAST kinase domains 3	FASTK mitochondrial RNA binding family	79072	ENSG00000124279	-0.105004	0.681418	-0.0901098	0.890274	-0.0355914	0.964755
TCACGTTTGGGCCAGGTCTTCTGA	TRCN0000469346	FASTKD3	FAST kinase domains 3	FASTK mitochondrial RNA binding family	79072	ENSG00000124279	-0.112794	0.90972	0.298402	0.904837	0.18503	0.921279
AAACTAGCCTCATCAAAATCACTA	TRCN0000466575	KCND2	potassium voltage-gated channel subfamily D member 2	Potassium voltage-gated channels	3751	ENSG00000184408	0.226099	0.584635	0.228903	0.772538	0.143516	0.885837
ATCCCCCCGAGGACTACGCACATA	TRCN0000466576	SULT1A3	sulfotransferase family 1A member 3	Sulfotransferases, cytosolic	6818	ENSG00000261052	0.107361	0.809026	0.110576	0.894762	0.183143	0.697269
ATGCTACGCCCGAGCGTATCCGTA	TRCN0000467038	SULT1A3	sulfotransferase family 1A member 3	Sulfotransferases, cytosolic	6818	ENSG00000261052	0.30346	0.431508	-0.0394566	0.983399	0.0833338	0.955961
AGCTTAAAACTCATCCGCATCTTC	TRCN0000466577	MAGEB4	MAGE family member B4	MAGE family	4115	ENSG00000120289	-0.281259	0.254299	-0.0574245	0.950264	-0.373103	0.228396
AATGAACGGGACAAGGCGTGGCGT	TRCN0000466578	F11R	F11 receptor	CD molecules|V-set domain containing|Immunoglobulin like domain containing|Ig-like cell adhesion molecule family	50848	ENSG00000158769	0.242717	0.382012	0.0028188	0.992088	0.193124	0.696365
ACTGATTAAGACGAGGACTCCACT	TRCN0000466579	ROPN1L	rhophilin associated tail protein 1 like		83853	ENSG00000145491	0.113825	0.6243	0.0202438	0.972492	0.119933	0.72878
GAACTTTCCGTTATGTCTCAATCA	TRCN0000489887	CHRM3	cholinergic receptor muscarinic 3	Cholinergic receptors muscarinic	1131	ENSG00000133019	NA	NA	0.0237878	NA	NA	NA
ACCGACTCTGATCATCTCTTGAAT	TRCN0000491958	CHRM3	cholinergic receptor muscarinic 3	Cholinergic receptors muscarinic	1131	ENSG00000133019	-0.0732868	0.867945	-0.252086	0.722155	0.150848	0.792423
AGGTATATGTAACCTTGCGGCCAA	TRCN0000466581	CHRM3	cholinergic receptor muscarinic 3	Cholinergic receptors muscarinic	1131	ENSG00000133019	0.0161468	NA	-0.00793265	NA	0.0490685	NA
GACCACGGCGGCAACATTCCAGCA	TRCN0000489751	CHRM3	cholinergic receptor muscarinic 3	Cholinergic receptors muscarinic	1131	ENSG00000133019	-0.111231	0.735058	-0.0990896	0.894818	0.0167095	0.982601
TTTAGGACGTCGCGTTATCACGGT	TRCN0000491837	CHRM3	cholinergic receptor muscarinic 3	Cholinergic receptors muscarinic	1131	ENSG00000133019	0.101799	0.831902	0.154435	0.854589	0.0860145	0.917986
ATCTCTAGAACCGTATCCGAGGAC	TRCN0000489844	CHRM3	cholinergic receptor muscarinic 3	Cholinergic receptors muscarinic	1131	ENSG00000133019	0.145285	0.767655	0.271594	0.675757	0.126316	0.875428
CCCTGGTCCGTTTTCGACCTAGAC	TRCN0000488345	CHRM3	cholinergic receptor muscarinic 3	Cholinergic receptors muscarinic	1131	ENSG00000133019	-0.0522981	0.905428	-0.295809	0.62272	0.0222433	0.981733
TTGCTGGAGAGACTACCACGTTGG	TRCN0000466582	RBBP7	RB binding protein 7, chromatin remodeling factor	WD repeat domain containing|EMSY complex|NuRD complex|SIN3 histone deacetylase complex subunits|Polycomb repressive complex 2|NURF complex	5931	ENSG00000102054	0.402671	0.589889	-0.0622288	0.984319	-0.0364817	0.992648
TGGGTAAAAGCGGACTAATTTCGA	TRCN0000466584	TEKT5	tektin 5	Tektins	146279	ENSG00000153060	-0.0813907	0.833434	-0.14187	0.867938	-0.121558	0.832404
GGTACGCTGCGTCTCAACCTTACA	TRCN0000466585	PNLIPRP2	pancreatic lipase related protein 2 (gene/pseudogene)	Lipases	5408	ENSG00000266200	-0.0563877	0.944503	-0.0964077	0.96295	0.105624	0.948138
ATCTTAGTCCGCTCACGATCATAT	TRCN0000466586	C8orf59	chromosome 8 open reading frame 59		401466	ENSG00000176731	0.304849	0.593268	0.232992	0.923209	0.296814	0.770527
AAGCTAGGACAAGGATACTCGCAC	TRCN0000466587	HPS1	HPS1, biogenesis of lysosomal organelles complex 3 subunit 1	Biogenesis of lysosomal organelles complex 3	3257	ENSG00000107521	0.0227133	0.970684	0.113972	0.909166	0.0553277	0.953748
CAATCAATAACCTCAGTACCACGA	TRCN0000466588	AKR1C1	aldo-keto reductase family 1 member C1	Aldo-keto reductases	1645	ENSG00000187134	-0.0310513	0.935247	0.0700585	0.939201	0.0246194	0.968669
AGCTCTACATACTCGCGCACTCGG	TRCN0000479983	AKR1C1	aldo-keto reductase family 1 member C1	Aldo-keto reductases	1645	ENSG00000187134	0.0261036	0.953354	-0.206918	0.779159	0.103673	0.881584
GATTTGCACCTTAGACAGGGGGTC	TRCN0000466589	TOLLIP	toll interacting protein	C2 domain containing	54472	ENSG00000078902	0.187258	0.616416	0.191585	0.812249	0.114321	0.884852
GATAAACAAGTCATTGATCTGGAA	TRCN0000479669	TOLLIP	toll interacting protein	C2 domain containing	54472	ENSG00000078902	0.0298835	0.947581	0.215676	0.672266	-0.0609632	0.932129
GCTGGACCTCCCTAGCACTTCTCG	TRCN0000466590	TMEM252	transmembrane protein 252		169693	ENSG00000181778	0.145511	0.600636	0.0557364	0.938762	0.0499585	0.94339
TCCTAAACTATCGTAGAAATCCGC	TRCN0000466591	C15orf40	chromosome 15 open reading frame 40		123207	ENSG00000169609	0.102552	0.744375	-0.0672893	0.939947	0.150269	0.731382
CAAACTTCTTTTCATCCTAAACCC	TRCN0000466592	GHRL	ghrelin and obestatin prepropeptide	Endogenous ligands	51738	ENSG00000157017	0.0403332	0.916577	0.0835184	0.902637	-0.00573044	0.994244
CAATGATTTCAGCATGCTAGCCTA	TRCN0000466593	GNGT2	G protein subunit gamma transducin 2	G protein subunits gamma	2793	ENSG00000167083	-0.112765	0.753863	-0.108467	0.889007	0.0974564	0.871659
GGCTGCTAGGCGCTCCTTCTGTTC	TRCN0000481379	RBM26	RNA binding motif protein 26	Zinc fingers CCCH-type|Protein phosphatase 1 regulatory subunits|RNA binding motif containing	64062	ENSG00000139746	-0.395518	0.595141	0.00757945	0.996868	-0.280831	0.874436
ATTCCAGTTGGGATTATAACAGCG	TRCN0000466594	RBM26	RNA binding motif protein 26	Zinc fingers CCCH-type|Protein phosphatase 1 regulatory subunits|RNA binding motif containing	64062	ENSG00000139746	0.226991	0.409444	0.26442	0.563014	0.0918502	0.879365
CGAGTGTACAGGTAAAGCGCTCCA	TRCN0000488352	NMUR2	neuromedin U receptor 2	Neuromedin U receptors	56923	ENSG00000132911	-0.132444	0.745806	-0.159619	0.875091	-0.193316	0.722904
TGCCGTTTTCTGAGATCCTTGACC	TRCN0000466595	NMUR2	neuromedin U receptor 2	Neuromedin U receptors	56923	ENSG00000132911	-0.137968	0.57683	-0.147713	0.847674	0.0622827	0.911405
CGCCCCTCCAATCAGTTCATAAAG	TRCN0000480467	NMUR2	neuromedin U receptor 2	Neuromedin U receptors	56923	ENSG00000132911	-0.147963	0.583375	-0.296861	0.291821	-0.180521	0.603658
GGCAAACCACCGGTAATATGTCGA	TRCN0000466597	RAP2C	RAP2C, member of RAS oncogene family	RAS type GTPase family	57826	ENSG00000123728	-0.0863039	0.767415	-0.0712042	0.913191	-0.0524541	0.917963
CTGGGAGCCTCGTGGGTCATTAAC	TRCN0000466598	MYO10	myosin X	Pleckstrin homology domain containing|Myosins, class X|FERM domain containing	4651	ENSG00000145555	-0.0414421	0.90522	-0.0243813	0.973707	-0.055919	0.911075
TATTGTCTCCGAAAGTGACATGGT	TRCN0000466599	SMG6	SMG6, nonsense mediated mRNA decay factor		23293	ENSG00000070366	-0.0584152	0.91916	0.0933146	0.921811	-0.0713202	0.945658
GACAATGAGAGATCCGTACAATTC	TRCN0000466600	CROT	carnitine O-octanoyltransferase		54677	ENSG00000005469	0.138078	0.635397	0.0691671	0.932828	0.171465	0.734676
AGTCAGCGCTCAGCAAAGTGTCGT	TRCN0000466601	DEFB127	defensin beta 127	Defensins, beta	140850	ENSG00000088782	-0.00639511	0.990622	-0.0251541	0.980658	0.103059	0.873487
CAGGCGTGAATACCGGCTGCGCGC	TRCN0000468491	DEFB127	defensin beta 127	Defensins, beta	140850	ENSG00000088782	-0.051119	0.880115	0.0113776	0.984701	-0.0188429	0.979878
GCGTATTCCGAGCACAAACTATTC	TRCN0000466602	PVR	poliovirus receptor	CD molecules|V-set domain containing|C2-set domain containing|Immunoglobulin like domain containing|Ig-like cell adhesion molecule family	5817	ENSG00000073008	-0.289684	0.657045	-0.0428755	0.986318	-0.0597109	0.977741
CCATATAGGAAATTTCAAACAAAT	TRCN0000488868	PIP5K1A	phosphatidylinositol-4-phosphate 5-kinase type 1 alpha		8394	ENSG00000143398	-0.0146435	0.975794	-0.0975715	0.918031	-0.069306	0.93893
ATCACCACTCATATCAAGTCGACA	TRCN0000466603	PIP5K1A	phosphatidylinositol-4-phosphate 5-kinase type 1 alpha		8394	ENSG00000143398	0.156282	0.742315	0.048144	0.982853	0.0633593	0.971648
CGCATACCATGCTAGACAACAGTG	TRCN0000471767	PIP5K1A	phosphatidylinositol-4-phosphate 5-kinase type 1 alpha		8394	ENSG00000143398	-0.194375	0.506747	-0.186291	0.768992	-0.163007	0.729951
GGGCATGATAGTAGCACCACATAC	TRCN0000466605	BORCS7	BLOC-1 related complex subunit 7	BLOC-1 related complex	119032	ENSG00000166275	-0.0603252	0.86908	-0.0631918	0.937572	0.0151896	0.9833
ACTATTCCTATAGCCAGTACGATG	TRCN0000471264	RABL6	RAB, member RAS oncogene family like 6	RAB like GTPases	55684	ENSG00000196642	-0.130516	0.852456	-0.105149	0.959732	-0.155348	0.90573
CGCTGGTTTCTTAACATCATCGAA	TRCN0000466606	RABL6	RAB, member RAS oncogene family like 6	RAB like GTPases	55684	ENSG00000196642	-0.631775	0.127499	-0.266075	0.915705	-0.39583	0.661677
ACTCGATAAAACTAGGGCTATTAC	TRCN0000466607	APOBEC3D	apolipoprotein B mRNA editing enzyme catalytic subunit 3D	Apolipoprotein B mRNA editing enzyme catalytic subunits	140564	ENSG00000243811	0.0383568	0.964112	-0.157899	0.938928	0.125406	0.9308
CTCTTTCCGAGGCTCCTTATCCTC	TRCN0000466608	LINC00636	long intergenic non-protein coding RNA 636		285205	ENSG00000240423	0.117906	0.787161	0.14639	0.8529	0.167502	0.794772
GACGAACGATATAACAACTTACCA	TRCN0000477227	BTNL3	butyrophilin like 3	Butyrophilins|V-set domain containing	10917	ENSG00000168903	0.0148733	0.96957	-0.00834594	0.993957	7.83156e-05	0.997113
TGATCGTGGCTGTCACCCCATGTC	TRCN0000466609	BTNL3	butyrophilin like 3	Butyrophilins|V-set domain containing	10917	ENSG00000168903	-0.0993452	0.71947	-0.203434	0.650581	-0.243614	0.438811
GGATCTTAATCTCCTCTTCAGGCG	TRCN0000466610	LRCH1	leucine rich repeats and calponin homology domain containing 1		23143	ENSG00000136141	-0.0793842	0.90972	-0.15052	0.945007	-0.0202312	0.992648
TATACTACTCCTGTTGCGCACCTC	TRCN0000466611	ACOT8	acyl-CoA thioesterase 8	Acyl-CoA thioesterases	10005	ENSG00000101473	-0.0699574	0.85714	0.0556122	0.949335	0.0649113	0.919364
ACACAGAAAAGCGGGGGTCCCGCA	TRCN0000466612	LINC01587	long intergenic non-protein coding RNA 1587		10141	ENSG00000082929	0.018158	0.960883	-0.0454849	0.958977	-0.00952211	0.99149
GTCAACACCCCTGCACCTACCTTT	TRCN0000466613	TMEM170A	transmembrane protein 170A		124491	ENSG00000166822	0.0572414	0.882866	0.164035	0.811204	0.185498	0.673908
AAAGTCTCTCTGTCTGGGCCCTCG	TRCN0000466614	NTRK3	neurotrophic receptor tyrosine kinase 3	Receptor tyrosine kinases|I-set domain containing	4916	ENSG00000140538	0.136428	0.841491	0.0997882	0.964561	-0.00997671	0.993397
TCGATGGTACGGTTACAATCTGAG	TRCN0000488840	NTRK3	neurotrophic receptor tyrosine kinase 3	Receptor tyrosine kinases|I-set domain containing	4916	ENSG00000140538	-0.025646	0.983789	-0.0747995	0.978983	-0.366706	0.838736
CACGGAAAAAGCCGCCAGTGATGG	TRCN0000489478	NTRK3	neurotrophic receptor tyrosine kinase 3	Receptor tyrosine kinases|I-set domain containing	4916	ENSG00000140538	-0.30119	0.547225	-0.380073	0.703981	-0.637168	0.152071
TCCTAGCAGCACTATGGTACACGG	TRCN0000472061	NTRK3	neurotrophic receptor tyrosine kinase 3	Receptor tyrosine kinases|I-set domain containing	4916	ENSG00000140538	0.0924766	0.909285	-0.168349	0.938344	-0.0764867	0.964938
TATCGCCAAACGCTGCGCAATAAT	TRCN0000492346	NTRK3	neurotrophic receptor tyrosine kinase 3	Receptor tyrosine kinases|I-set domain containing	4916	ENSG00000140538	0.250711	0.748716	-0.25931	0.928666	0.161125	0.925716
CCGAAACTCTCCGAGAGGCGTCAT	TRCN0000491535	NTRK3	neurotrophic receptor tyrosine kinase 3	Receptor tyrosine kinases|I-set domain containing	4916	ENSG00000140538	-0.15416	0.878934	-0.00618178	0.996414	0.0330629	0.991461
TTGCGCCCGCGTTTGCCTGTCGCC	TRCN0000476092	MGST1	microsomal glutathione S-transferase 1	Microsomal glutathione S-transferases	4257	ENSG00000008394	0.108216	0.782117	0.158449	0.823817	0.0990394	0.868043
AATTGTCATTACAGGACCGTTAGT	TRCN0000466615	MGST1	microsomal glutathione S-transferase 1	Microsomal glutathione S-transferases	4257	ENSG00000008394	0.231458	0.4018	0.398146	0.199908	0.324088	0.298113
CAATTAACCTACAAACTTTTCTTA	TRCN0000466616	IRF3	interferon regulatory factor 3		3661	ENSG00000126456	-0.145061	0.682494	-0.270709	0.564107	-0.00703163	0.993784
CCTTTGGACATACGCTGTAATGAG	TRCN0000489181	IRF3	interferon regulatory factor 3		3661	ENSG00000126456	0.0182885	0.970843	0.0400435	0.968787	-0.0164757	0.987383
CAGTACACGTGATCCGGGACCTAG	TRCN0000466617	NAA38	N(alpha)-acetyltransferase 38, NatC auxiliary subunit	N(alpha)-acetyltransferase subunits|LSm proteins	84316	ENSG00000183011	-0.0785508	0.83381	-0.155653	0.821111	-0.0598955	0.925763
GACCCTTTTGTACTGTTAACGGCA	TRCN0000470906	NAA38	N(alpha)-acetyltransferase 38, NatC auxiliary subunit	N(alpha)-acetyltransferase subunits|LSm proteins	84316	ENSG00000183011	-0.0646372	0.955146	0.105169	0.968489	0.010912	0.99525
TCCGACAGCAGTACCCGAACTGTA	TRCN0000466618	UBA7	ubiquitin like modifier activating enzyme 7	Ubiquitin like modifier activating enzymes	7318	ENSG00000182179	-0.242027	0.743216	-0.10067	0.967882	-0.150411	0.94496
CCACCAGCACCGCCTCTTCCGATG	TRCN0000466619	EIF3F	eukaryotic translation initiation factor 3 subunit F	Eukaryotic translation initiation factor 3	8665	ENSG00000175390	-0.138597	0.638334	-0.139677	0.839134	-0.277319	0.329565
AACCTCCATCCCGAATTCTCGCCT	TRCN0000488320	ROM1	retinal outer segment membrane protein 1	Tetraspanins	6094	ENSG00000149489	0.253645	0.334764	0.210944	0.787404	0.106269	0.87676
ACCTTGTCTTGTCCTCTTGACGAG	TRCN0000489012	ROM1	retinal outer segment membrane protein 1	Tetraspanins	6094	ENSG00000149489	0.0789468	0.808034	-0.0276287	0.973685	0.0406033	0.952033
AGTATCGATACGGTGATAAGACTG	TRCN0000466620	ROM1	retinal outer segment membrane protein 1	Tetraspanins	6094	ENSG00000149489	0.185178	0.501744	0.028515	0.970829	0.0276786	0.973719
TACTTTATCCTGCGATGTTGCCGT	TRCN0000466622	IL17F	interleukin 17F	Interleukins	112744	ENSG00000112116	-0.0321128	0.947783	0.105376	0.901892	0.0177675	0.984138
CATCAAGGCAAAGACTTCACACAC	TRCN0000466623	KLK15	kallikrein related peptidase 15	Kallikreins	55554	ENSG00000174562	-0.131235	0.526576	-0.00288445	0.993706	-0.103993	0.781214
AACAGGACTAAGAACACTTAATGA	TRCN0000478332	KLK15	kallikrein related peptidase 15	Kallikreins	55554	ENSG00000174562	-0.00133961	0.996106	0.186345	0.64897	0.0554237	0.923801
ACCCCTATGCAGCTGAGGTGGTTA	TRCN0000471931	KLK15	kallikrein related peptidase 15	Kallikreins	55554	ENSG00000174562	0.0206055	0.952272	-0.0607466	0.929272	0.0689884	0.893474
TTGAGTTTAACAAAGCCTCTCTTT	TRCN0000466624	SMARCAL1	SWI/SNF related, matrix associated, actin dependent regulator of chromatin, subfamily a like 1		50485	ENSG00000138375	0.182264	0.823547	0.118414	0.966633	0.178324	0.922451
ACGAGCATACTATGGCCATGTAGA	TRCN0000466625	ADIPOR2	adiponectin receptor 2	Adiponectin receptors|Progestin and adipoQ receptor family	79602	ENSG00000006831	-0.0993873	0.779877	-0.00338672	0.995476	-0.0600757	0.927911
GAGAGAACCATGAACGTTGCGATT	TRCN0000466626	CHD2	chromodomain helicase DNA binding protein 2	DNA helicases	1106	ENSG00000173575	0.0324988	0.948818	0.0264192	0.974045	-0.168092	0.79368
GCGAGAGTAGTTGCACTCGTTTCA	TRCN0000466628	PFN2	profilin 2		5217	ENSG00000070087	-0.0182365	0.962833	0.00529541	0.989162	0.0997293	0.796053
CTCTCGTGCCAGATATTTGGACCA	TRCN0000466629	KIF1BP	KIF1 binding protein	Tetratricopeptide repeat domain containing	26128	ENSG00000198954	-0.183448	0.560385	-0.068839	0.934726	-0.267021	0.390303
CCCGCGTAGACTAACGTGTTGCAC	TRCN0000473602	CHAC2	ChaC cation transport regulator homolog 2		494143	ENSG00000143942	-0.160209	0.545659	-0.011463	0.991212	-0.122536	0.843718
CCTTGAGCCACAAACATTCCCACA	TRCN0000466630	CHAC2	ChaC cation transport regulator homolog 2		494143	ENSG00000143942	0.266592	0.752875	0.104276	0.972675	0.331045	0.820844
CGGACCGACACGAGCACACATAAT	TRCN0000466631	SALL4	spalt like transcription factor 4	Zinc fingers C2H2-type	57167	ENSG00000101115	-0.147064	0.794131	-0.281442	0.85452	-0.535672	0.213758
GGTACAGGGGAGCGGACCCTTTTA	TRCN0000466633	CTNND1	catenin delta 1	Armadillo repeat containing|p120 catenin family	1500	ENSG00000198561	-0.018948	0.974917	0.162541	0.919049	0.0877957	0.922743
TTTAGGCCAATCCAAGCGCCTCCC	TRCN0000466634	A1CF	APOBEC1 complementation factor	RNA binding motif containing	29974	ENSG00000148584	0.107937	0.929909	0.0427794	0.988665	-0.0169057	0.993333
CCCTTGCTTTACTATATTCTCCAA	TRCN0000466635	CDKN2C	cyclin dependent kinase inhibitor 2C	Ankyrin repeat domain containing	1031	ENSG00000123080	-0.128326	0.894527	-0.171898	0.954047	0.213129	0.902199
CCGAGGCGGTTTTTTCGCCTAATT	TRCN0000488529	C3AR1	complement C3a receptor 1	Complement component GPCRs|Complement system regulators and receptors	719	ENSG00000171860	-0.187768	0.676664	-0.212352	0.82922	-0.0552808	0.966737
CACTCCCATCTATTAATGTGTGGT	TRCN0000466636	C3AR1	complement C3a receptor 1	Complement component GPCRs|Complement system regulators and receptors	719	ENSG00000171860	-0.257372	0.804142	-0.262706	0.957434	-0.271707	0.905622
AACGCCAAACCATATGCACCGTCC	TRCN0000488852	C3AR1	complement C3a receptor 1	Complement component GPCRs|Complement system regulators and receptors	719	ENSG00000171860	0.211632	0.743216	-0.13524	0.953254	-0.0478132	0.982001
TTCTCTAACACGTACCTTCCAATA	TRCN0000466637	STPG2	sperm tail PG-rich repeat containing 2		285555	ENSG00000163116	0.0231806	NA	0.0451123	NA	0.21096	0.926152
CCGTTGTCGCAGGTAGGATGGTGT	TRCN0000466638	GBP1	guanylate binding protein 1		2633	ENSG00000117228	-0.316956	0.685216	-0.419395	0.847941	-0.0358736	0.992648
ATGACTTGCGCGCAGGGGCCATTC	TRCN0000466639	STMN2	stathmin 2	Stathmins	11075	ENSG00000104435	0.0756577	0.882481	0.0528663	0.959583	0.0826421	0.926663
CTATATCTGCGACTTATCGGCCCC	TRCN0000466640	PHB	prohibitin		5245	ENSG00000167085	-0.0945376	0.828232	0.0478405	0.952436	-0.0337948	0.96778
TCCAGATTTCTTTGATAACCTCGT	TRCN0000470466	PHB	prohibitin		5245	ENSG00000167085	-0.0302169	0.971262	0.0115769	0.99608	0.0938198	0.949786
GTTAATCGACCCTGTTAGTCCATC	TRCN0000471347	PHB	prohibitin		5245	ENSG00000167085	0.222985	0.540357	0.274262	0.704834	0.164116	0.801254
GCCAGCCTCTTTTAGACACTGATC	TRCN0000466641	TEX12	testis expressed 12		56158	ENSG00000150783	0.0604113	0.84728	0.130492	0.810796	0.0255839	0.973017
TAAAACCTATGCACGCATGGCATA	TRCN0000466642	FAM107A	family with sequence similarity 107 member A		11170	ENSG00000168309	-0.0436244	0.96712	-0.0170853	0.994487	0.0146653	0.993397
TTGCTAAATGCGACCGGAAGGATG	TRCN0000466643	OS9	OS9, endoplasmic reticulum lectin	MRH domain containing	10956	ENSG00000135506	-0.016946	0.974357	0.0250146	0.9744	-0.103144	0.861713
CTAGCTCGCTAATATATAACGAAA	TRCN0000469945	OS9	OS9, endoplasmic reticulum lectin	MRH domain containing	10956	ENSG00000135506	-0.0179034	0.977023	0.03622	0.970241	0.11326	0.903446
ACGGATCAATCGAGATTTTAAATA	TRCN0000466644	AP1M2	adaptor related protein complex 1 subunit mu 2		10053	ENSG00000129354	0.0350174	0.9456	0.0224661	0.979588	0.0140792	0.987591
GATAGCTTACGACTACCTGCTATG	TRCN0000481528	AP1M2	adaptor related protein complex 1 subunit mu 2		10053	ENSG00000129354	-0.010345	0.986282	0.258835	0.720827	0.0484798	0.955697
GAACCCACTTTGATGTCGATGGCT	TRCN0000466645	PVALB	parvalbumin	EF-hand domain containing	5816	ENSG00000100362	0.0312869	0.957006	0.156372	0.85383	0.296986	0.471375
CTGTTCTCAGCTTGAACAGATATT	TRCN0000466646	ZNF513	zinc finger protein 513	Zinc fingers C2H2-type	130557	ENSG00000163795	-0.28563	0.682071	-0.143442	0.956581	-0.0382772	0.988671
CACGAACCCGCCGATTCTACGGTC	TRCN0000466647	RPS26	ribosomal protein S26	S ribosomal proteins	6231	ENSG00000197728	-0.240888	0.288011	-0.23847	0.671289	-0.19855	0.641159
CCGGAACCCAATGCAAATTGACCG	TRCN0000466648	C16orf54	chromosome 16 open reading frame 54		283897	ENSG00000185905	-0.0445677	0.900204	-0.0450362	0.956784	-0.0483685	0.946427
AACTCACAACGTTCTGCATCCTTT	TRCN0000466649	KRTAP19-7	keratin associated protein 19-7	Keratin associated proteins	337974	ENSG00000244362	0.0530973	0.948317	0.145523	0.945007	0.145537	0.922046
AATCCCTTTGGTATAAACTTCACA	TRCN0000466650	RAB32	RAB32, member RAS oncogene family	RAB, member RAS oncogene GTPases|A-kinase anchoring proteins	10981	ENSG00000118508	0.0983777	0.838584	0.112639	0.901892	0.172311	0.795431
GTAGTATTTCTTAAATAGCTGGAA	TRCN0000466651	SLC12A1	solute carrier family 12 member 1	Solute carriers	6557	ENSG00000074803	0.147408	0.766355	-0.00105265	0.996414	0.0516449	0.977098
TCTGACGTACATCTACAACACTAC	TRCN0000466653	DTD1	D-tyrosyl-tRNA deacylase 1		92675	ENSG00000125821	0.129999	0.766991	0.0374701	0.965785	0.0435907	0.96537
TAAGCCTATCTGAGGCAGCTCTTG	TRCN0000468374	DTD1	D-tyrosyl-tRNA deacylase 1		92675	ENSG00000125821	-0.000481137	0.99819	-0.019087	0.989427	0.135438	0.862411
ATGGTATAAATTGTCACCCAACTA	TRCN0000489029	GPSM3	G protein signaling modulator 3		63940	ENSG00000213654	0.209998	0.347753	0.183622	0.695331	0.23661	0.433085
CATGTTTACATCCACCTTGACGGA	TRCN0000488685	GPSM3	G protein signaling modulator 3		63940	ENSG00000213654	-0.133035	0.620806	0.0509023	0.937373	-0.0852246	0.878066
AATACCGTAACCTGTCAAATCGAC	TRCN0000466654	GPSM3	G protein signaling modulator 3		63940	ENSG00000213654	0.214611	0.355252	0.207855	0.639284	0.169618	0.67169
CCATGGGAATCCTCTGTAAGTCAG	TRCN0000466655	DAB2	DAB2, clathrin adaptor protein		1601	ENSG00000153071	-0.174274	0.674106	-0.337109	0.635305	-0.152667	0.869278
ATTAGGTTAACGGACCAACGTTCG	TRCN0000466656	PLOD3	procollagen-lysine,2-oxoglutarate 5-dioxygenase 3		8985	ENSG00000106397	0.134343	0.872229	-0.153822	0.956581	0.00708465	0.996654
TTACACCCTGAGGTTTATGTGTAT	TRCN0000466657	ASH2L	ASH2 like, histone lysine methyltransferase complex subunit	PHD finger proteins|WRAD complex	9070	ENSG00000129691	0.13496	0.763044	0.196165	0.81933	-0.146934	0.843598
GCCTGGATCCAGAGTTGCCCCGTC	TRCN0000466658	ZXDC	ZXD family zinc finger C	Zinc fingers C2H2-type	79364	ENSG00000070476	0.136786	0.687459	-0.0693042	0.954542	0.165781	0.750083
TGGGATTTACACAAACAACACGCT	TRCN0000466659	SUMF2	sulfatase modifying factor 2		25870	ENSG00000129103	-0.155227	0.655981	-0.0226452	0.985005	-0.126754	0.83791
GTTATCTTATAACGAACTAGGTGT	TRCN0000472863	SUMF2	sulfatase modifying factor 2		25870	ENSG00000129103	0.309002	0.35077	0.308161	0.580305	0.33555	0.414879
AGCCGATCACTGAGGCTACCCGAG	TRCN0000466660	RGMA	repulsive guidance molecule BMP co-receptor a	Repulsive guidance molecule family	56963	ENSG00000182175	-0.161041	0.48817	-0.285858	0.388709	-0.229018	0.463915
CAACCATTTTTCAGGATTCTATGG	TRCN0000466663	TMEM126B	transmembrane protein 126B	Mitochondrial complex I assembly complex	55863	ENSG00000171204	-0.025451	0.944663	0.084743	0.88221	0.0779971	0.87305
AACCTACACGTTTTCTGCGCCGGG	TRCN0000470085	TMEM126B	transmembrane protein 126B	Mitochondrial complex I assembly complex	55863	ENSG00000171204	0.111475	0.809095	0.16743	0.859839	0.221968	0.692022
ACTATCCCACAGTAGTGTCCTTCG	TRCN0000466664	PHACTR4	phosphatase and actin regulator 4	Phosphatase and actin regulators|Protein phosphatase 1 regulatory subunits	65979	ENSG00000204138	-0.0437104	0.941496	-0.0892628	0.939865	-0.0637226	0.949224
TCGTTATACATTGCGCACCCGGGC	TRCN0000477735	PHACTR4	phosphatase and actin regulator 4	Phosphatase and actin regulators|Protein phosphatase 1 regulatory subunits	65979	ENSG00000204138	0.146155	0.891699	0.331704	0.916652	0.371818	0.833561
GCGCTGAAACGCAAGTTTAACTAA	TRCN0000466666	REN	renin		5972	ENSG00000143839	-0.247398	0.632107	-0.0989267	0.960761	-0.0135727	0.993103
ACAGCTATGCTGGGTCCGATAGTT	TRCN0000466667	HIST1H4H	histone cluster 1 H4 family member h	Histones	8365	ENSG00000158406	-0.0718233	0.80773	-0.0364281	0.96546	0.116825	0.763697
AAATTGTTGTTGTCACATGCCGTA	TRCN0000473699	HIST1H4H	histone cluster 1 H4 family member h	Histones	8365	ENSG00000158406	0.280366	0.262058	0.377059	0.2348	0.223063	0.602223
GTCACGGGACAACCGATCGACTTC	TRCN0000466668	C19orf44	chromosome 19 open reading frame 44		84167	ENSG00000105072	-0.00958171	0.986145	-0.179419	0.837637	-0.0455333	0.957227
ACCGCCTCACAAACATCCCGGGCA	TRCN0000466669	CRY1	cryptochrome circadian regulator 1		1407	ENSG00000008405	-0.169713	0.637434	-0.127975	0.902935	-0.115211	0.840117
TAGTACAGGGTCGCGACACTTACG	TRCN0000492211	CRY1	cryptochrome circadian regulator 1		1407	ENSG00000008405	-0.20897	0.779484	0.160571	0.950768	-0.163627	0.922933
CATATGCTTGTGTTTTGGCCGGAA	TRCN0000489831	CRY1	cryptochrome circadian regulator 1		1407	ENSG00000008405	0.0425266	0.944861	-0.0776039	0.948765	-0.174372	0.869136
ACCTTCCGCCCGGCCATCTAACCT	TRCN0000475468	PREPL	prolyl endopeptidase like		9581	ENSG00000138078	-0.0162266	0.983491	0.102764	0.965383	-0.0367983	0.988122
TTCGCTGGTGGAAAAGCCATCACG	TRCN0000466670	PREPL	prolyl endopeptidase like		9581	ENSG00000138078	0.0470683	0.855472	0.0721571	0.883677	0.0134439	0.982422
CTTCCACCAGTTATAATCCAACTC	TRCN0000466671	EIF1AY	eukaryotic translation initiation factor 1A Y-linked		9086	ENSG00000198692	0.0529809	0.870004	0.111148	0.879911	0.168375	0.636575
GAATAATATCTAATAAACATTTAG	TRCN0000466672	CRABP1	cellular retinoic acid binding protein 1	Fatty acid binding protein family	1381	ENSG00000166426	0.12321	0.67295	0.207148	0.727012	0.210586	0.590607
CAAGGAACCGACCGTTGGATTCAT	TRCN0000466673	HLA-DQB1	major histocompatibility complex, class II, DQ beta 1	Histocompatibility complex|C1-set domain containing	3119	ENSG00000179344	-0.187281	0.879966	-0.133126	0.970991	-0.211172	0.928387
GTACCCCAGTCATAGTGCGCCCTT	TRCN0000466675	ARHGAP27	Rho GTPase activating protein 27	Pleckstrin homology domain containing|Rho GTPase activating proteins	201176	ENSG00000159314	-0.285165	0.708493	-0.0835578	0.976403	0.262772	0.879799
ACCCGCGACTCCAGGATTGTGATT	TRCN0000467884	LRRC37B	leucine rich repeat containing 37B		114659	ENSG00000185158	-0.0233914	0.951172	-0.0467225	0.945569	-0.134608	0.699388
ACGATCGTGATATACAATGGCACG	TRCN0000466676	LRRC37B	leucine rich repeat containing 37B		114659	ENSG00000185158	0.0606269	0.902268	-0.0981884	0.933349	-0.0600257	0.961779
ACCCAAGAAACTGGTCCAATCAGA	TRCN0000466677	IL10	interleukin 10	Interleukins	3586	ENSG00000136634	-0.0235362	0.947783	-0.0952456	0.895456	-0.0703242	0.90483
CAACCTTGGTTTGCCCGTACCTGC	TRCN0000466679	N4BP2L1	NEDD4 binding protein 2 like 1		90634	ENSG00000139597	-0.116661	0.646643	-0.0819004	0.904182	-0.108391	0.840631
GAGCACCCCCTAAGGACTCAATGA	TRCN0000466680	TEX37	testis expressed 37		200523	ENSG00000172073	0.0897192	0.764226	0.0837024	0.888101	0.0519761	0.923801
CAAACCTTTCCCAAGCCTCCAATC	TRCN0000466681	TFAP4	transcription factor AP-4	Basic helix-loop-helix proteins	7023	ENSG00000090447	-0.0272496	0.97544	-0.110826	0.95868	-0.118311	0.941452
GAAAAAGCTTTTAGGCTTTAGGGT	TRCN0000466682	AEN	apoptosis enhancing nuclease	Exonucleases	64782	ENSG00000181026	0.0758746	0.86699	-0.0546328	0.956069	0.00135695	0.997228
TTAAATATTTTTTACAGTTTAGCC	TRCN0000469648	AEN	apoptosis enhancing nuclease	Exonucleases	64782	ENSG00000181026	0.296302	0.386323	0.245301	0.770598	0.178935	0.793553
ATATACTTTCTAGGCATTCCACGC	TRCN0000478635	AEN	apoptosis enhancing nuclease	Exonucleases	64782	ENSG00000181026	0.291971	0.284304	0.220354	0.745683	0.180593	0.72892
TATAGGATCCGCAGTTGCTCCGTT	TRCN0000466683	SERTM1	serine rich and transmembrane domain containing 1		400120	ENSG00000180440	-0.0757875	0.838931	-0.121162	0.858789	0.00203938	0.996742
CGCCATGACTAAAGCATGAGAATC	TRCN0000466684	ZNF593	zinc finger protein 593		51042	ENSG00000142684	-0.331544	0.0359989	-0.14256	0.794881	-0.168128	0.689104
CACGCCAAAGAAACCTCGAAGCTG	TRCN0000466685	CHCHD7	coiled-coil-helix-coiled-coil-helix domain containing 7	Mitochondrial coiled-coil-helix-coiled-coil-helix domain containing proteins	79145	ENSG00000170791	-0.14753	0.377684	-0.127182	0.70971	-0.152587	0.503417
CACGCCATCGCACTAAAGTCCACA	TRCN0000466686	HNRNPR	heterogeneous nuclear ribonucleoprotein R	RNA binding motif containing	10236	ENSG00000125944	-0.364793	0.353792	-0.433187	0.315768	-0.654056	0.0551666
CAACGATCGAGTTGTAACGAAGGG	TRCN0000466687	SWAP70	switching B cell complex subunit SWAP70	Pleckstrin homology domain containing|EF-hand domain containing|Minor histocompatibility antigens	23075	ENSG00000133789	-0.220699	0.456112	-0.0192428	0.987139	-0.209904	0.661974
TGTTTTCTAGACTCATTACGACCA	TRCN0000466688	INHBA	inhibin subunit beta A	Endogenous ligands|Inhibin subunits	3624	ENSG00000122641	0.189218	0.398453	0.0767279	0.914362	0.101659	0.834899
ACACCGGTCTGCTCCCGATCGGGC	TRCN0000466690	TNFAIP2	TNF alpha induced protein 2		7127	ENSG00000185215	-0.00787578	0.987915	-0.0947752	0.918348	-0.139063	0.820941
TCATGCTTAGTCCCCTTTCGGGCA	TRCN0000471706	GCSH	glycine cleavage system protein H		2653	ENSG00000140905	0.084543	0.927316	-0.126877	0.959732	-0.0993911	0.955961
TCCAACGCAGCACACTCACTGTGG	TRCN0000466691	GCSH	glycine cleavage system protein H		2653	ENSG00000140905	-0.200988	0.595393	-0.0363834	0.975718	-0.11536	0.892457
TATTCTTCGGCCATCACAATACAC	TRCN0000466692	RAD54L2	RAD54 like 2		23132	ENSG00000164080	-0.0293119	NA	-0.00163154	NA	-0.0202404	NA
GGACAATCAATGTACAAGGCACCC	TRCN0000466693	GNG2	G protein subunit gamma 2	G protein subunits gamma	54331	ENSG00000186469	-0.134262	0.536887	-0.137417	0.765488	-0.14141	0.60701
GATGCAATGCTAAGATCTATCTCA	TRCN0000475372	BOLA2	bolA family member 2		552900	ENSG00000183336	0.107889	0.731053	0.107814	0.852216	0.0993353	0.812305
ATTAATCGAAACTGTCCCCATAGT	TRCN0000466694	BOLA2	bolA family member 2		552900	ENSG00000183336	0.222668	0.445041	0.228307	0.685362	0.202158	0.6783
ATGTTCCAGTCTCAGACTGCATTT	TRCN0000466695	RPL36	ribosomal protein L36	L ribosomal proteins	25873	ENSG00000130255	0.114026	0.782952	0.22371	0.772746	0.117663	0.868641
GACCGCACGGCCGAAATTCTACTC	TRCN0000466696	TARBP2	TARBP2, RISC loading complex RNA binding subunit		6895	ENSG00000139546	-0.0123593	0.981148	0.12981	0.858494	0.122515	0.87782
AGACTCTAACACACCTGTCTTGGC	TRCN0000466697	RPE	ribulose-5-phosphate-3-epimerase		6120	ENSG00000197713	0.139519	0.560686	0.023029	0.971478	0.119809	0.793713
TGAACAATCTGTCTGGCTTTCACA	TRCN0000467416	STAU2	staufen double-stranded RNA binding protein 2		27067	ENSG00000040341	-0.0272525	0.981849	-0.142835	0.964561	0.300022	0.878389
GGGAGCCGCTTTGCGACGCCCTTG	TRCN0000481145	STAU2	staufen double-stranded RNA binding protein 2		27067	ENSG00000040341	-0.120884	0.870114	-0.169875	0.942943	0.0810205	0.962271
TCGAATGTTGACTGGTGAAGTTAT	TRCN0000466698	STAU2	staufen double-stranded RNA binding protein 2		27067	ENSG00000040341	0.022367	0.959311	-0.174389	0.809488	-0.0294986	0.978841
ACACCTAAACCACCATAACCAAAT	TRCN0000466700	TMEM131L	transmembrane 131 like		23240	ENSG00000121210	0.0107293	0.993197	-0.129105	0.966633	0.290289	0.889464
ATATATCGCGCGGGTCGGCCCTTG	TRCN0000466701	DNTTIP2	deoxynucleotidyltransferase terminal interacting protein 2		30836	ENSG00000067334	0.0123573	0.993051	-0.210877	0.945009	0.189416	0.919134
TCCCTAACAGCGACTTTGAGTTTG	TRCN0000466702	FAM166A	family with sequence similarity 166 member A		401565	ENSG00000188163	-0.0401681	0.92585	-0.0738582	0.922343	-0.0485396	0.954559
ACAAATACCTATTAGCCAATGAGA	TRCN0000466703	NADK2	NAD kinase 2, mitochondrial		133686	ENSG00000152620	-0.000278253	0.997745	0.250265	0.740628	0.089164	0.908383
AGCCGATCCTTTATGCTTTCGTAC	TRCN0000489766	NADK2	NAD kinase 2, mitochondrial		133686	ENSG00000152620	-0.0369037	0.940518	0.0408868	0.956762	0.00538329	0.993622
CTCATTTACATACACTTAACTCTT	TRCN0000487878	NADK2	NAD kinase 2, mitochondrial		133686	ENSG00000152620	0.170386	0.531192	0.0352473	0.960606	0.308316	0.271932
ACGTAGAACTATTACGTTTATCAG	TRCN0000466704	FAN1	FANCD2 and FANCI associated nuclease 1		22909	ENSG00000198690	-0.00306371	0.996213	0.298773	0.885558	-0.240426	0.832235
GCCCTGCAGACGTGCTATTAGCGG	TRCN0000466705	RNF144B	ring finger protein 144B	Ring finger proteins|RBR E3 ubiquitin ligases	255488	ENSG00000137393	0.00640418	0.985621	-0.0233796	0.978664	0.0639534	0.913035
CTGTCAGCAAGAATCATGGTGATC	TRCN0000481021	GNL2	G protein nucleolar 2		29889	ENSG00000134697	0.220535	0.601413	0.0911652	0.966633	0.190681	0.864016
ACCCTTCTGGGCTTCCTGTGATGA	TRCN0000466706	GNL2	G protein nucleolar 2		29889	ENSG00000134697	0.0588153	0.92571	0.181622	0.866681	0.209594	0.732174
CGTGTCACTGTCCATGGGCTACTC	TRCN0000466707	SIPA1L2	signal induced proliferation associated 1 like 2	PDZ domain containing	57568	ENSG00000116991	-0.326476	0.18252	-0.188078	0.810108	-0.0136347	0.99017
CCTGCTGGCTCGGGGCGCGTTCTA	TRCN0000466708	TINF2	TERF1 interacting nuclear factor 2	Shelterin complex	26277	ENSG00000092330	-0.129177	0.741041	-0.137446	0.877527	-0.101869	0.891591
TCTCGCAGGACAGTTCGGCCAACT	TRCN0000466709	TUBB4B	tubulin beta 4B class IVb	Tubulins	10383	ENSG00000188229	-0.0550828	0.945907	-0.115155	0.958329	0.00541741	0.997465
TTATGAGACCAAGCTCAAACTTGG	TRCN0000488236	S1PR5	sphingosine-1-phosphate receptor 5	Sphingosine 1-phosphate receptors	53637	ENSG00000180739	0.140949	0.736138	0.127303	0.884976	-0.0612642	0.950879
CTCCTGCAGCTCCAAGCGAGCACA	TRCN0000487761	S1PR5	sphingosine-1-phosphate receptor 5	Sphingosine 1-phosphate receptors	53637	ENSG00000180739	-0.0491683	0.917485	-0.133406	0.888197	-0.151504	0.792965
CTTAATCTACTAATTCACAGAGCC	TRCN0000466710	S1PR5	sphingosine-1-phosphate receptor 5	Sphingosine 1-phosphate receptors	53637	ENSG00000180739	0.0369212	0.937015	0.117292	0.89537	0.158919	0.780087
ACTTGCCCCCGAGTCCTAGACATA	TRCN0000487973	S1PR5	sphingosine-1-phosphate receptor 5	Sphingosine 1-phosphate receptors	53637	ENSG00000180739	0.0186419	0.985558	0.40302	0.828534	0.16548	0.918804
GTTCTCAGTGGCCTAAGTTCCATT	TRCN0000487935	S1PR5	sphingosine-1-phosphate receptor 5	Sphingosine 1-phosphate receptors	53637	ENSG00000180739	0.0033568	0.998292	-0.0613152	0.973216	0.174721	0.874436
CAAAGAGGTTTAGCCGCCCGACTA	TRCN0000466711	RSPH9	radial spoke head 9 homolog		221421	ENSG00000172426	-0.242697	0.336979	-0.114208	0.888197	-0.0592807	0.933397
CTAAGGAAGTGTCAACTCATCATG	TRCN0000468129	MLLT6	MLLT6, PHD finger containing	PHD finger proteins	4302	ENSG00000275023	-0.0571032	0.887952	0.031231	0.9715	0.0382312	0.963084
GCATATGGGCAGTAATGCTACTTC	TRCN0000466712	MLLT6	MLLT6, PHD finger containing	PHD finger proteins	4302	ENSG00000275023	0.123129	0.717803	-0.0720892	0.942801	0.0618512	0.925008
CGATCATTTTTGAGTTCTCCTGTT	TRCN0000466842	SCAMP3	secretory carrier membrane protein 3	Secretory carrier membrane proteins	10067	ENSG00000116521	-0.123824	0.708717	0.0200383	0.971379	-0.0885266	0.876077
ACTCAACAAGTCCTCTCTCATGTT	TRCN0000466714	SCAMP3	secretory carrier membrane protein 3	Secretory carrier membrane proteins	10067	ENSG00000116521	0.173171	0.459784	0.107378	0.866622	0.092028	0.850705
CGACTTCTGTAATATGTGCTCATC	TRCN0000466715	CDK9	cyclin dependent kinase 9	Cyclin dependent kinases|P-TEFb complex	1025	ENSG00000136807	-0.26993	0.571292	-0.0389751	0.979413	-0.0999889	0.898901
AATTGCCAATATTTTACCTCCTTA	TRCN0000488358	CDK9	cyclin dependent kinase 9	Cyclin dependent kinases|P-TEFb complex	1025	ENSG00000136807	0.0506612	0.965551	0.0688441	0.982667	0.135921	0.9524
AAACCGCGAGCGCTGCGTGCCTTT	TRCN0000488759	CDK9	cyclin dependent kinase 9	Cyclin dependent kinases|P-TEFb complex	1025	ENSG00000136807	0.259815	0.774463	0.341738	0.908253	0.189168	0.937308
TGCATTGATTCACATCGACTACTC	TRCN0000478185	CDK9	cyclin dependent kinase 9	Cyclin dependent kinases|P-TEFb complex	1025	ENSG00000136807	0.0733772	0.903721	0.157395	0.858432	0.026909	0.982631
TAGTTCATAAAGTCCTGTACGTTG	TRCN0000478604	NLK	nemo like kinase		51701	ENSG00000087095	-0.528428	0.0352345	-0.21836	0.783728	-0.460062	0.226401
CTTAACTCTCCCTAGTTGAACAGG	TRCN0000466716	NLK	nemo like kinase		51701	ENSG00000087095	-0.424487	0.497408	0.0888612	0.972789	-0.366812	0.765888
CATAATCGCACCGCATGCTGTAGA	TRCN0000466717	MAGI1	membrane associated guanylate kinase, WW and PDZ domain containing 1	Trinucleotide repeat containing|Membrane associated guanylate kinases|PDZ domain containing	9223	ENSG00000151276	-0.0343435	NA	-0.0541763	NA	-0.0271512	NA
CCTCCTGGGCGGCACTGTCAAACC	TRCN0000489163	PI4K2B	phosphatidylinositol 4-kinase type 2 beta	Minor histocompatibility antigens	55300	ENSG00000038210	-0.141728	0.765777	-0.166169	0.930398	-0.12595	0.882045
TGTCTCCGGACCTAACTAATTTTC	TRCN0000466718	PI4K2B	phosphatidylinositol 4-kinase type 2 beta	Minor histocompatibility antigens	55300	ENSG00000038210	-0.19154	0.588419	-0.150591	0.876314	-0.266988	0.628002
CTATAATCCGGTGTCTTCCTGATA	TRCN0000487730	PIK3CA	phosphatidylinositol-4,5-bisphosphate 3-kinase catalytic subunit alpha	Phosphatidylinositol 3-kinase subunits	5290	ENSG00000121879	-0.0278588	0.981042	-0.791457	0.316387	-0.848293	0.263966
ATCGATTGCCGCGTTCCGGACGGC	TRCN0000488940	PIK3CA	phosphatidylinositol-4,5-bisphosphate 3-kinase catalytic subunit alpha	Phosphatidylinositol 3-kinase subunits	5290	ENSG00000121879	-0.0754176	0.952929	-0.296936	0.934859	0.065557	0.986755
TCAACACGTATCACATCGAGACAA	TRCN0000489648	PIK3CA	phosphatidylinositol-4,5-bisphosphate 3-kinase catalytic subunit alpha	Phosphatidylinositol 3-kinase subunits	5290	ENSG00000121879	-0.403369	0.617022	-1.43364	0.0101574	-0.813422	0.214229
TGCGGTCCCCACATTGGACTAAGA	TRCN0000489040	PIK3CA	phosphatidylinositol-4,5-bisphosphate 3-kinase catalytic subunit alpha	Phosphatidylinositol 3-kinase subunits	5290	ENSG00000121879	0.0388021	NA	NA	NA	0.0176294	NA
ACAGGGACAGAACAGCACTTAAAA	TRCN0000488231	PIK3CA	phosphatidylinositol-4,5-bisphosphate 3-kinase catalytic subunit alpha	Phosphatidylinositol 3-kinase subunits	5290	ENSG00000121879	0.0788832	NA	0.583164	0.914461	NA	NA
TCAAATGAGTCCCCTTCTTCAGAG	TRCN0000491318	PIK3CA	phosphatidylinositol-4,5-bisphosphate 3-kinase catalytic subunit alpha	Phosphatidylinositol 3-kinase subunits	5290	ENSG00000121879	-0.588097	0.316785	-0.232942	0.953254	-0.0611934	0.98795
CTTTTTGGTTTTAGCATAGAAATC	TRCN0000488035	PIK3CA	phosphatidylinositol-4,5-bisphosphate 3-kinase catalytic subunit alpha	Phosphatidylinositol 3-kinase subunits	5290	ENSG00000121879	-0.00929221	0.9938	-0.0179966	0.995162	0.575157	0.729502
GTAGCCATTTTATGGGGCTAGTAC	TRCN0000492093	PIK3CA	phosphatidylinositol-4,5-bisphosphate 3-kinase catalytic subunit alpha	Phosphatidylinositol 3-kinase subunits	5290	ENSG00000121879	-0.205945	0.83825	-0.534533	0.717594	-0.129922	0.955961
GCCGGTCGAACCGGCGTGGCAGGA	TRCN0000487714	PIK3CA	phosphatidylinositol-4,5-bisphosphate 3-kinase catalytic subunit alpha	Phosphatidylinositol 3-kinase subunits	5290	ENSG00000121879	-0.094661	NA	-0.00996211	NA	0.0225468	NA
AATCCTATTACCATGTTCGGTAGT	TRCN0000489394	PIK3CA	phosphatidylinositol-4,5-bisphosphate 3-kinase catalytic subunit alpha	Phosphatidylinositol 3-kinase subunits	5290	ENSG00000121879	0.00303234	NA	-0.0250825	NA	0.0259449	NA
TCTCCTTTCAGTAACGGCTAAGAC	TRCN0000466719	PIK3CA	phosphatidylinositol-4,5-bisphosphate 3-kinase catalytic subunit alpha	Phosphatidylinositol 3-kinase subunits	5290	ENSG00000121879	-0.140731	0.896697	-0.0190216	0.995162	-0.391037	0.83205
TAGATCATCAGTTATGACTCGTCA	TRCN0000466720	CENPP	centromere protein P	Constitutive centromere associated network	401541	ENSG00000188312	0.0784639	0.848353	0.000635433	0.993913	0.0390292	0.966495
CGACTGACGATCACGCATCGCGTC	TRCN0000466721	POLE	DNA polymerase epsilon, catalytic subunit	DNA polymerases	5426	ENSG00000177084	-0.278414	0.281779	-0.405587	0.218655	-0.0609546	0.941086
CAGCCCGCCGCGTTCTTTCCGTTT	TRCN0000466722	TM9SF1	transmembrane 9 superfamily member 1	Transmembrane 9 superfamily members	10548	ENSG00000100926	-0.171698	0.671677	-0.169041	0.883618	-0.187882	0.80146
GTCATTCATAAATTTCCGACGTCC	TRCN0000471240	MRPL1	mitochondrial ribosomal protein L1	Mitochondrial ribosomal proteins	65008	ENSG00000169288	0.313998	0.189302	0.138276	0.846356	0.145765	0.797364
ACACGTATCCGACAAAGGCGTAAA	TRCN0000466723	MRPL1	mitochondrial ribosomal protein L1	Mitochondrial ribosomal proteins	65008	ENSG00000169288	0.120576	0.60058	0.118778	0.832942	0.0326554	0.95524
TAACCCTGGTTTCTATGGAAATCC	TRCN0000466726	HOMER3	homer scaffold protein 3	Homer scaffold proteins	9454	ENSG00000051128	0.155899	0.904483	-0.0328964	NA	-0.0250592	NA
GGCTTTGTTGAGCTCAAATGATTG	TRCN0000488613	HOMER3	homer scaffold protein 3	Homer scaffold proteins	9454	ENSG00000051128	0.0285978	0.945012	-0.104704	0.902406	0.0855616	0.8839
TGGACTCCAATTTAGTCCCTGTTC	TRCN0000488500	HOMER3	homer scaffold protein 3	Homer scaffold proteins	9454	ENSG00000051128	-0.125213	0.604499	-0.133576	0.847126	-0.305756	0.309027
GATGGCTTTCTTTAACAGGCGAGC	TRCN0000466728	MED24	mediator complex subunit 24	Mediator complex	9862	ENSG00000008838	0.00157699	NA	0.0310115	NA	NA	NA
TTTCCGCTGATCCCGACACGTTAG	TRCN0000470068	PDCD6IP	programmed cell death 6 interacting protein		10015	ENSG00000170248	0.0463062	0.960463	-0.0685018	0.973216	-0.0557774	0.980778
CATGTTTTCTAACCGCAAGTCTGT	TRCN0000466729	PDCD6IP	programmed cell death 6 interacting protein		10015	ENSG00000170248	-0.00568754	NA	-0.00967873	NA	-0.0552838	NA
CTTGCCAACTTTTACACGTTGCGG	TRCN0000466730	C14orf39	chromosome 14 open reading frame 39		317761	ENSG00000179008	0.02091	0.972102	-0.122602	0.911864	-0.0127818	0.990498
GGCTCTGGTGCGGACAGCAGAAGC	TRCN0000466732	PIK3R1	phosphoinositide-3-kinase regulatory subunit 1	SH2 domain containing	5295	ENSG00000145675	-0.205893	0.606687	0.0296675	0.974373	-0.181158	0.808237
TTCACCGGAGCCTGAGATAGGCTA	TRCN0000470397	PIK3R1	phosphoinositide-3-kinase regulatory subunit 1	SH2 domain containing	5295	ENSG00000145675	-0.375412	0.41126	-0.119	0.95554	0.206227	0.856113
ATCGATACCGAATTCTCCGGACTG	TRCN0000466733	CGGBP1	CGG triplet repeat binding protein 1		8545	ENSG00000163320	0.112283	0.873893	0.348574	0.784823	0.144081	0.91822
CGCCCTGATTCCAAAGGCTGCATG	TRCN0000466734	CACNB1	calcium voltage-gated channel auxiliary subunit beta 1	Membrane associated guanylate kinases|Calcium voltage-gated channel auxiliary beta subunits	782	ENSG00000067191	-0.202653	0.478705	-0.445628	0.0470472	-0.522551	0.0122597
TACGTGCTATTTCTCAGTGGGGTC	TRCN0000466735	GNPTAB	N-acetylglucosamine-1-phosphate transferase subunits alpha and beta	EF-hand domain containing	79158	ENSG00000111670	-0.118048	0.750277	-0.103736	0.909197	-0.0440148	0.962128
ACATATCCGAGACCTATTTGAATG	TRCN0000466737	RER1	retention in endoplasmic reticulum sorting receptor 1		11079	ENSG00000157916	0.140358	0.596138	0.0602021	0.926948	0.191241	0.654829
TGGATGTAAACCCACAATCCGGCG	TRCN0000466738	CCDC33	coiled-coil domain containing 33	C2 domain containing	80125	ENSG00000140481	-0.0186841	0.969472	-0.160614	0.804076	-0.138461	0.799129
TCTTATCATTTTCCCTAGAATCGC	TRCN0000466739	TACSTD2	tumor associated calcium signal transducer 2		4070	ENSG00000184292	0.112608	0.829591	0.163682	0.862752	-0.0304675	0.98795
CTTCTGTCGCCTGGTTCGTCCCGT	TRCN0000466740	SDCBP2	syndecan binding protein 2	PDZ domain containing	27111	ENSG00000125775	-0.0939807	0.866842	-0.0456829	0.977018	0.147689	0.835571
GTTTATGGACCATTTTACGGGACA	TRCN0000466741	SPSB2	splA/ryanodine receptor domain and SOCS box containing 2		84727	ENSG00000111671	0.206527	0.383213	0.225634	0.716313	0.390626	0.0923916
TCGATAGTAACTATTTTGCCTAAT	TRCN0000466742	CNST	consortin, connexin sorting protein	Protein phosphatase 1 regulatory subunits	163882	ENSG00000162852	-0.0366529	0.949064	-0.00445581	0.995736	0.028736	0.978715
TTGCGTGTGATGTTCCCACTTATC	TRCN0000466743	STK32A	serine/threonine kinase 32A	AGC family kinases	202374	ENSG00000169302	0.0159768	0.977451	0.0999879	0.928198	0.218548	0.689722
TCAACAACCCATGATATTGCCACC	TRCN0000489951	STK32A	serine/threonine kinase 32A	AGC family kinases	202374	ENSG00000169302	-0.102939	0.795193	0.0347342	0.967108	-0.0301222	0.9781
GTACGTCCGAGATTCGGAGGCTTG	TRCN0000468266	KIAA1143	KIAA1143		57456	ENSG00000163807	0.00844228	NA	0.0608334	NA	-0.0140936	NA
TAGTTTTATATGGTTCTCCTCGGC	TRCN0000466744	KIAA1143	KIAA1143		57456	ENSG00000163807	0.150621	0.583131	0.200902	0.718915	0.256134	0.410527
AATGTCAATCCCCGATGTAATACG	TRCN0000467775	NARF	nuclear prelamin A recognition factor		26502	ENSG00000141562	0.0988668	0.907983	0.0254344	0.992912	0.165349	0.91139
GTAAGCTGTGGGATGTCCCGAATG	TRCN0000466745	NARF	nuclear prelamin A recognition factor		26502	ENSG00000141562	-0.0487724	0.931378	0.126834	0.87277	0.1323	0.828764
GACCTGTCATAAACTCAGTACTTT	TRCN0000466747	FAM133A	family with sequence similarity 133 member A		286499	ENSG00000179083	-0.465487	0.0606037	-0.347972	0.498283	-0.315723	0.403545
TGACTCGCGTTGCAACCAATCGTG	TRCN0000478702	RPLP2	ribosomal protein lateral stalk subunit P2	L ribosomal proteins	6181	ENSG00000177600	-0.165354	0.423947	-0.185119	0.543455	-0.12447	0.693078
CGACCCGGGCCCTGACTTCGTGAG	TRCN0000466748	RPLP2	ribosomal protein lateral stalk subunit P2	L ribosomal proteins	6181	ENSG00000177600	-0.272082	0.0706731	-0.181671	0.556598	-0.325805	0.0511076
GCTCAAAGCGCTCAACTACCAATA	TRCN0000466751	C11orf24	chromosome 11 open reading frame 24		53838	ENSG00000171067	0.190362	0.832265	0.0868658	0.974668	0.0307708	0.992648
GGCGAGTTACTAATCCTTTCTGGG	TRCN0000466752	HSPBP1	HSPA (Hsp70) binding protein 1	Armadillo-like helical domain containing	23640	ENSG00000133265	-0.0263488	0.9618	0.0533156	0.947391	-0.216831	0.679899
TTGGATTTCATGACTCCGGCTGTA	TRCN0000468684	HSPBP1	HSPA (Hsp70) binding protein 1	Armadillo-like helical domain containing	23640	ENSG00000133265	0.103468	0.740002	0.0896713	0.897304	0.021747	0.974822
TGTACGGGGTCCCTGCGTGTATGT	TRCN0000466753	OSM	oncostatin M	Interleukin 6 type cytokine family	5008	ENSG00000099985	-0.515735	0.000106126	-0.388033	0.128706	-0.371386	0.272177
AAACTGCTGAAATAACCAGGGAGG	TRCN0000466754	CSH2	chorionic somatomammotropin hormone 2	Growth hormone family	1443	ENSG00000213218	0.261215	0.334143	0.0684267	0.933203	0.124136	0.853433
TGAGAGTTTTCAACTTTGCGAACA	TRCN0000466755	ATF6	activating transcription factor 6	Basic leucine zipper proteins	22926	ENSG00000118217	-0.191727	0.461206	-0.129485	0.874292	-0.0790975	0.895309
CAAATACATCGGTACACGCTCTTG	TRCN0000466756	PIGP	phosphatidylinositol glycan anchor biosynthesis class P	Phosphatidylinositol glycan anchor biosynthesis	51227	ENSG00000185808	0.0097188	0.986978	-0.121219	0.953254	0.131544	0.884294
GGTTTTCACAATCCACCCCTAGAG	TRCN0000466757	CALML4	calmodulin like 4	EF-hand domain containing	91860	ENSG00000129007	-0.0294002	0.95532	0.247941	0.523917	-0.046373	0.959462
CCGTATCTTTATAGAATCCTCGGA	TRCN0000466759	SPIC	Spi-C transcription factor	ETS transcription factor family	121599	ENSG00000166211	-0.198376	0.454072	-0.198452	0.812411	-0.0811597	0.916228
GAGACAGTCGAGCAACCATATACA	TRCN0000466760	ZBED4	zinc finger BED-type containing 4	Zinc fingers BED-type	9889	ENSG00000100426	-0.276341	0.720095	0.0495654	0.985589	0.0963813	0.966565
AGTGCTGCACGATATCGTACACTG	TRCN0000466761	SSX4	SSX family member 4		6759	ENSG00000268009	0.0265099	0.940378	0.0107114	0.984757	-0.0444693	0.944298
CCACCCTATAATTCAACTACCTAC	TRCN0000475229	SSX4	SSX family member 4		6759	ENSG00000268009	-0.187079	0.658397	0.136288	0.873	-0.358661	0.370486
AGACTCGCATACCGTCAAATTGAG	TRCN0000466762	CHIT1	chitinase 1	Chitinases	1118	ENSG00000133063	0.189021	0.570304	-0.0378501	0.972551	-0.00131586	0.998217
GCCCTCCCTTGTTCGTCGGACGCC	TRCN0000477228	CHIT1	chitinase 1	Chitinases	1118	ENSG00000133063	0.0518854	0.886068	-0.0194905	0.986127	0.0111205	0.985727
ATTTCAAACAAATATCTTTATCAT	TRCN0000466763	MYLK3	myosin light chain kinase 3		91807	ENSG00000140795	0.222861	0.764001	0.291057	0.896914	0.144975	0.939649
TACTCGGCTGCTGGTCTCCTTGCT	TRCN0000468573	MYLK3	myosin light chain kinase 3		91807	ENSG00000140795	0.0843616	0.92202	-0.0797629	0.969064	-0.0584218	0.977098
TGTCTCCGGCCTGGGCGCCTTTCA	TRCN0000466764	AES	amino-terminal enhancer of split		166	ENSG00000104964	0.0642542	0.879141	0.0119035	0.986706	-0.0941769	0.90346
GCCATCTGCCGTGAGGCCCAGGTG	TRCN0000466765	DERL2	derlin 2	Rhomboid family	51009	ENSG00000072849	0.0328064	0.920607	0.0391097	0.947865	0.0300158	0.959644
CTGTTCCCAGTGAATGTGTTTTGC	TRCN0000466766	BORCS6	BLOC-1 related complex subunit 6	BLOC-1 related complex	54785	ENSG00000196544	-0.18079	0.585403	-0.0539661	0.960578	-0.0451355	0.961059
ATGCCCATTTAACCTGAAATTCGC	TRCN0000466767	CRYBB1	crystallin beta B1	Beta-gamma crystallins	1414	ENSG00000100122	0.214517	0.441188	0.160871	0.837029	0.0580921	0.934179
GTGTGCCCTGCACCCCACTCTTGC	TRCN0000466768	GAS2L3	growth arrest specific 2 like 3		283431	ENSG00000139354	0.288755	0.63951	0.2677	0.909737	0.0931546	0.962271
CACCAGTATCGGGACTCGTTCTGC	TRCN0000466770	ATAT1	alpha tubulin acetyltransferase 1		79969	ENSG00000137343	-0.163379	0.524561	-0.172001	0.745227	-0.128591	0.747373
AACGTTTTGAGAATACGGCTCAAC	TRCN0000466771	C16orf71	chromosome 16 open reading frame 71		146562	ENSG00000166246	0.176968	0.668931	0.0111277	0.99625	0.00269551	0.999419
TCCTCTCACTTCAGCGTTTAGCAG	TRCN0000466772	FAM193B	family with sequence similarity 193 member B		54540	ENSG00000146067	-0.0798889	0.908906	0.0412607	0.968787	-0.151079	0.847875
TAATACAATTCTATTTAACTTATA	TRCN0000466773	CLEC14A	C-type lectin domain containing 14A	C-type lectin domain containing	161198	ENSG00000176435	0.0794317	0.917243	0.110093	0.95868	0.0985494	0.948943
CTTCGATGTAGACACAACAGCAAG	TRCN0000466775	RAB1A	RAB1A, member RAS oncogene family	RAB, member RAS oncogene GTPases	5861	ENSG00000138069	0.0234975	0.968587	0.0403272	0.966744	0.017317	0.984554
GGCATTTGCTGTTCAGCACCGCGG	TRCN0000474245	MCM2	minichromosome maintenance complex component 2	MCM family|Deafness associated genes	4171	ENSG00000073111	-0.0716213	0.931538	-0.0999272	0.964561	0.0217115	0.993103
TATTGACCAATCTTAGATATTTGT	TRCN0000489304	MCM2	minichromosome maintenance complex component 2	MCM family|Deafness associated genes	4171	ENSG00000073111	-0.0860231	0.921958	-0.160638	0.950768	-0.0868935	0.962271
CACATTCAGCGACTTTCGTACGGA	TRCN0000471867	MCM2	minichromosome maintenance complex component 2	MCM family|Deafness associated genes	4171	ENSG00000073111	-0.0344071	0.971029	-0.307285	0.85452	-0.31059	0.75511
ATTTATATGCAAAAGGCAACAAGC	TRCN0000466776	MCM2	minichromosome maintenance complex component 2	MCM family|Deafness associated genes	4171	ENSG00000073111	0.0554481	0.965427	0.0723518	0.98039	0.0325852	0.992648
GTCTGTCAGTTTCCAATATTTCTT	TRCN0000466777	PRPSAP1	phosphoribosyl pyrophosphate synthetase associated protein 1		5635	ENSG00000161542	0.0914601	0.848852	0.0174685	0.984897	0.292144	0.601693
TTAATTAGCTTAAAGCACGGCATA	TRCN0000466780	PCDHA10	protocadherin alpha 10	Clustered protocadherins	56139	ENSG00000250120	0.372809	0.34966	0.151789	0.950768	0.0337126	0.988671
AATTGTGGTGCTTGTTGCCGCCTG	TRCN0000466781	ACTG1	actin gamma 1	Actins|Deafness associated genes	71	ENSG00000184009	0.215393	0.724645	0.278001	0.885295	0.254983	0.802768
AATGGGAGTTCTCACGTCAGGTCC	TRCN0000471742	ACTG1	actin gamma 1	Actins|Deafness associated genes	71	ENSG00000184009	0.188466	0.798239	0.092834	0.969064	0.0580188	0.979687
ACTGGGTCACAGTAGTGATTACCC	TRCN0000466782	TGIF2	TGFB induced factor homeobox 2	TALE class homeoboxes and pseudogenes	60436	ENSG00000118707	0.162561	0.594544	0.0904813	0.901387	0.126789	0.789003
AGCCCGAATAGGCTCTTACCAAGC	TRCN0000466783	ELL	elongation factor for RNA polymerase II	Protein phosphatase 1 regulatory subunits|Super elongation complex	8178	ENSG00000105656	-0.127043	0.882113	-0.150981	0.952648	-0.178144	0.93042
AAAACCCAGGTCGTTCCAACTCAG	TRCN0000466784	SFXN1	sideroflexin 1	Sideroflexins|Solute carriers	94081	ENSG00000164466	0.0235174	0.96752	0.160689	0.854454	0.193841	0.73748
GACAAGAAGATGACTTCTGCTATT	TRCN0000468013	SFXN1	sideroflexin 1	Sideroflexins|Solute carriers	94081	ENSG00000164466	0.12677	0.608668	0.107186	0.847278	0.0621237	0.910515
TAAAGCGGCTTTTGCAGTAACACT	TRCN0000466785	PDLIM2	PDZ and LIM domain 2	LIM domain containing|PDZ domain containing	64236	ENSG00000120913	-0.13576	0.525085	-0.0579944	0.928812	-0.00400424	0.9951
GCCGAGATTTATCTGATCGGGAAA	TRCN0000467071	TPD52L3	TPD52 like 3		89882	ENSG00000170777	0.0844024	0.809441	0.0402728	0.955448	-0.0679806	0.926572
AGCCTTGACTCTGACCTGCCCCTT	TRCN0000470244	TPD52L3	TPD52 like 3		89882	ENSG00000170777	-0.0483384	0.914339	0.0585153	0.939496	-0.115707	0.823938
CATTCGTATTCTATAAACTACAGT	TRCN0000487780	TPD52L3	TPD52 like 3		89882	ENSG00000170777	-0.0453139	0.942257	0.0257978	0.979555	0.0299561	0.977135
ACCTTCCGGTACCTGAATCAGCCG	TRCN0000466786	TPD52L3	TPD52 like 3		89882	ENSG00000170777	-0.0779395	0.886061	0.10058	0.910433	0.13072	0.877586
GCCCATGCAGAACCTTCAAACTAG	TRCN0000474525	BUB3	BUB3, mitotic checkpoint protein	WD repeat domain containing	9184	ENSG00000154473	0.0159209	0.973562	0.241083	0.65851	0.0280653	0.976427
GGATCTAACACGGCCCTCACTGTA	TRCN0000466787	BUB3	BUB3, mitotic checkpoint protein	WD repeat domain containing	9184	ENSG00000154473	-0.063923	0.960463	-0.0834766	0.984524	-0.0341504	0.992648
CTTGAGATGGGCCAGTAACTGTGC	TRCN0000466788	BTBD9	BTB domain containing 9	BTB domain containing	114781	ENSG00000183826	-0.0212058	NA	-0.0350164	NA	0.031353	0.992648
ACCGAGCTTCCTGGGTACCTTGGA	TRCN0000466789	KRTAP10-5	keratin associated protein 10-5	Keratin associated proteins	386680	ENSG00000241123	0.0273372	0.922086	0.0016119	0.988385	-0.0153577	0.980645
TCCCTAGAATGCAATACTATTATC	TRCN0000466790	LSP1P3	LSP1 pseudogene 3		729862	ENSG00000162685	0.0609446	0.81654	0.0629367	0.89056	0.0375377	0.940139
GAAAGTCCGTCCATTGTTCGGGAG	TRCN0000478469	LSP1P3	LSP1 pseudogene 3		729862	ENSG00000162685	0.0233755	0.963805	0.119375	0.893815	0.133332	0.827968
GCCCTGTCCCAACGCTGTTGTTAA	TRCN0000466792	CDC20B	cell division cycle 20B	WD repeat domain containing	166979	ENSG00000164287	0.180056	0.412028	0.149762	0.812874	0.203177	0.680083
ATTACATATTATCTTGTGATCTCA	TRCN0000466793	GPC3	glypican 3	Glypicans	2719	ENSG00000147257	0.0790968	NA	0.0505508	NA	0.00376029	NA
ATCAAGGGCCTAAGGTAAACAGCT	TRCN0000466795	BPI	bactericidal permeability increasing protein	BPI fold containing	671	ENSG00000101425	0.230744	0.820893	0.202047	0.953254	0.0224345	NA
CTTACAATAACTAAGCAGCCCCCG	TRCN0000466796	SNX21	sorting nexin family member 21	Sorting nexins|Tetratricopeptide repeat domain containing	90203	ENSG00000124104	-0.133339	0.700288	-0.173143	0.825905	0.0124987	0.986174
GGACAAAGAGTTCTATCACCGTCA	TRCN0000466797	SECISBP2	SECIS binding protein 2		79048	ENSG00000187742	-0.106434	0.809709	0.124101	0.871794	-0.0337589	0.963508
GGTAGCTTATCCAACCTAGGTTTT	TRCN0000473142	SECISBP2	SECIS binding protein 2		79048	ENSG00000187742	0.068339	0.929972	-0.13369	0.953096	-0.117545	0.937365
ACTTAGCAATCAGAGCGGCGAACA	TRCN0000466798	PPP1CA	protein phosphatase 1 catalytic subunit alpha	Protein phosphatase catalytic subunits	5499	ENSG00000172531	-0.147754	0.87961	0.0728908	0.983399	0.0659424	0.982971
CATACAATGTCGAAGTCAAGGAAT	TRCN0000466799	SULT1A1	sulfotransferase family 1A member 1	Sulfotransferases, cytosolic	6817	ENSG00000196502	0.0289996	0.961887	0.0190592	0.984184	-0.131763	0.854408
CTACGCCTAACAATAGCTAGTCAG	TRCN0000466800	LIMD2	LIM domain containing 2	LIM domain containing	80774	ENSG00000136490	0.0681342	0.797647	-0.0173942	0.981999	-0.0225166	0.978227
ATGCCCGGGGAGTCGTACGTAAGG	TRCN0000466802	LONRF1	LON peptidase N-terminal domain and ring finger 1	Ring finger proteins	91694	ENSG00000154359	0.103585	0.800298	0.0858633	0.927435	0.141008	0.803733
CTGAGTTACGATAAGTAAGCACAC	TRCN0000466804	ARID5A	AT-rich interaction domain 5A	AT-rich interaction domain containing	10865	ENSG00000196843	0.0283855	0.946807	-0.0973016	0.901628	0.0856325	0.884524
AGCAGTATTTACGCACTAGCTGCA	TRCN0000489449	HTR2B	5-hydroxytryptamine receptor 2B	5-hydroxytryptamine receptors, G protein-coupled	3357	ENSG00000135914	-0.042908	0.925497	0.0330587	0.967328	-0.151597	0.793811
CCTCCAACTGCAGAATGATGGACA	TRCN0000466805	HTR2B	5-hydroxytryptamine receptor 2B	5-hydroxytryptamine receptors, G protein-coupled	3357	ENSG00000135914	-0.481168	0.525243	-0.0440377	0.988716	-0.152704	0.945118
CGCGTCGATCAGTACTCTATTATA	TRCN0000488770	HTR2B	5-hydroxytryptamine receptor 2B	5-hydroxytryptamine receptors, G protein-coupled	3357	ENSG00000135914	-0.164028	0.696511	-0.334113	0.578798	-0.272731	0.636377
GTCAGGTCATCGTTGATAAAAAGT	TRCN0000466807	HSD3B7	hydroxy-delta-5-steroid dehydrogenase, 3 beta- and steroid delta-isomerase 7	Short chain dehydrogenase/reductase superfamily	80270	ENSG00000099377	0.205109	0.409715	0.089918	0.91165	0.0702773	0.923586
GAGCTTCCAGTCTAGCTTCGTCTG	TRCN0000466808	RAD23A	RAD23 homolog A, nucleotide excision repair protein	Nucleotide excision repair	5886	ENSG00000179262	0.133194	0.766636	0.148869	0.880854	-0.00833108	0.994581
CCACTGTATCTTGTTACTTGGTCA	TRCN0000469095	TMEM51	transmembrane protein 51		55092	ENSG00000171729	-0.0138814	0.974357	-0.180287	0.735775	0.00328488	0.995422
GATTAACTCCATCATTCTTGGTTC	TRCN0000472953	TMEM51	transmembrane protein 51		55092	ENSG00000171729	0.199294	0.85033	-0.058151	0.985456	0.176366	0.94496
CTACTAACCATCCGTCAGTTTTTA	TRCN0000466810	TMEM51	transmembrane protein 51		55092	ENSG00000171729	-0.06989	0.87544	0.582604	0.707922	-0.187214	0.748667
CACCATCTTCCTCTACTAGCAACA	TRCN0000466811	OSTC	oligosaccharyltransferase complex non-catalytic subunit	Oligosaccharyltransferase complex subunits	58505	ENSG00000198856	-0.138267	0.722074	0.0215748	0.976633	-0.0284287	0.976911
CATTGACTTTCGGTTTTATATCCT	TRCN0000466813	MRPS6	mitochondrial ribosomal protein S6	Mitochondrial ribosomal proteins	64968	ENSG00000243927	0.211828	0.634789	0.280565	0.667683	0.207813	0.832235
AAAAACTCCAATTTCGTAGCAACG	TRCN0000466815	CORO2A	coronin 2A	WD repeat domain containing|Coronins	7464	ENSG00000106789	0.311316	0.553848	0.164432	0.948527	0.181498	0.898652
TCCTGCTAGTTAATTTACTTTTAA	TRCN0000468923	CORO2A	coronin 2A	WD repeat domain containing|Coronins	7464	ENSG00000106789	0.159821	0.631067	0.126052	0.878052	0.0316225	0.9726
ACAAGAGACGGGGGGCAGCTTTTC	TRCN0000466816	ACTG1P17	actin gamma 1 pseudogene 17		283693	ENSG00000259315	0.0441016	0.905119	0.112943	0.851422	0.0297638	0.964692
GAACCGTGTAGAAGCAACGATACA	TRCN0000466818	CCDC102B	coiled-coil domain containing 102B		79839	ENSG00000150636	0.0334881	0.941118	-0.0405486	0.965572	0.0371695	0.968791
TTACGTCGAAGTCGCAATGCACCG	TRCN0000472837	CCDC102B	coiled-coil domain containing 102B		79839	ENSG00000150636	-0.0392349	0.944658	0.156242	0.859655	0.318085	0.44505
ATCAGCGCACGACGTAAACACCTG	TRCN0000466819	RAB40A	RAB40A, member RAS oncogene family	RAB, member RAS oncogene GTPases	142684	ENSG00000172476	0.134759	0.557968	0.122058	0.839181	0.117804	0.733294
AAAGAGACCTTCCCCTTGCTCTTT	TRCN0000466820	LINC00029	long intergenic non-protein coding RNA 29		100144596	ENSG00000125514	-0.085187	0.931327	-0.127419	0.964561	0.128139	0.94496
ACGCATCCGCCCGGCTTCCCCTGA	TRCN0000474693	NCR3	natural cytotoxicity triggering receptor 3	CD molecules|V-set domain containing	259197	ENSG00000204475	0.176626	0.438886	0.154917	0.806683	-0.0308348	0.968519
CTGATTGGGGCACAATCATCTCGA	TRCN0000466821	NCR3	natural cytotoxicity triggering receptor 3	CD molecules|V-set domain containing	259197	ENSG00000204475	-0.0108011	0.976583	-0.0119763	0.989533	0.0129382	0.982848
[truncated: 15,007 more rows]

## Sheet: OVSAHO
ID	Construct IDs	Gene Symbol	Name	Gene family	entrez_id	ensembl_gene_id	LFC cisplatin	q-value cisplatin	LFC paclitaxel	q-value paclitaxel	LFC cisplatin/paclitaxel	q-value cisplatin/paclitaxel
GACGAATCAGGCCCTCGAACGTCA	TRCN0000465206	ZDHHC11	zinc finger DHHC-type containing 11	Zinc fingers DHHC-type	79844	ENSG00000188818	0.233057	0.659227	-0.0973181	0.98572	0.297631	0.999612
GTTTCATACTGTAAGCTGGCCCCG	TRCN0000465207	LMOD1	leiomodin 1		25802	ENSG00000163431	0.443793	0.336965	0.557613	0.884159	1.09321	0.993365
AGGTCTCTTACCTTAGGAGACTTT	TRCN0000468677	PFKFB1	6-phosphofructo-2-kinase/fructose-2,6-biphosphatase 1	6-phosphofructo-2-kinases/fructose-2,6-biphosphatases	5207	ENSG00000158571	0.536972	0.277462	0.303992	0.955171	0.296668	0.999612
ATAGAGCTCCCACAACATGACCTC	TRCN0000480117	PFKFB1	6-phosphofructo-2-kinase/fructose-2,6-biphosphatase 1	6-phosphofructo-2-kinases/fructose-2,6-biphosphatases	5207	ENSG00000158571	0.232375	0.619163	-0.0787755	0.987764	0.422706	0.999612
CCAAGAGATCCAATCTGACACCAC	TRCN0000465209	PFKFB1	6-phosphofructo-2-kinase/fructose-2,6-biphosphatase 1	6-phosphofructo-2-kinases/fructose-2,6-biphosphatases	5207	ENSG00000158571	-0.573066	0.0585043	-0.121631	0.972426	-0.13649	0.985058
GTAGGGTCACACACTAGCGGCTCG	TRCN0000465210	NKAIN4	sodium/potassium transporting ATPase interacting 4	Na+/K+ transporting ATPase interacting	128414	ENSG00000101198	0.137095	0.677423	-0.151265	0.939162	0.174313	0.920287
CTCCTTCAACCCACCTAAAAGTCG	TRCN0000465211	MRPS18A	mitochondrial ribosomal protein S18A	Mitochondrial ribosomal proteins	55168	ENSG00000096080	-0.19176	0.635854	-0.201336	0.940227	-0.0679467	0.995647
CTCTTTTCGCGTAAAATAGAAACC	TRCN0000465212	TICAM1	toll like receptor adaptor molecule 1	TIR domain containing	148022	ENSG00000127666	0.107242	0.758755	-0.095614	0.97321	0.0350278	0.988483
TTCGTACTCCGGTTCCTGTGCTTC	TRCN0000465213	RHOG	ras homolog family member G	Rho family GTPases	391	ENSG00000177105	0.0978396	0.740059	0.18451	0.846577	0.408451	0.733937
TTTTAGCCTGGCGAAAACTGCTGC	TRCN0000465214	TRIT1	tRNA isopentenyltransferase 1		54802	ENSG00000043514	0.455969	0.118396	0.165876	0.932925	0.914112	0.215352
CGAACCATCAGACAAATGTTACTA	TRCN0000478187	CCDC114	coiled-coil domain containing 114		93233	ENSG00000105479	-0.610428	0.00245892	-0.592664	0.544184	-0.366624	0.824619
TTCATTACCATAACTCGGTGGCCA	TRCN0000465215	CCDC114	coiled-coil domain containing 114		93233	ENSG00000105479	0.184339	0.685975	0.169634	0.947713	0.437922	0.809822
TTTGTAGACCATAAGGTCTAAGTT	TRCN0000465216	HAGHL	hydroxyacylglutathione hydrolase like		84264	ENSG00000103253	-0.141751	0.785477	0.0166297	0.999811	-0.114608	0.999612
CCTATAATATTCCAAGTGTCTTTA	TRCN0000465241	HAGHL	hydroxyacylglutathione hydrolase like		84264	ENSG00000103253	-0.156247	0.639898	-0.283661	0.91057	-0.0188625	0.99562
AGCTACACAGAACGGCTCCTGGCG	TRCN0000473324	HAGHL	hydroxyacylglutathione hydrolase like		84264	ENSG00000103253	NA	NA	NA	NA	NA	NA
CACATGGCTGGCATCATGTCGTCG	TRCN0000465217	NABP2	nucleic acid binding protein 2		79035	ENSG00000139579	-0.410557	0.156187	-0.383651	0.83187	-0.657071	0.627838
TGAGATCCACAGATCATGAGACCC	TRCN0000465218	TTC23L	tetratricopeptide repeat domain 23 like		153657	ENSG00000205838	-0.0773049	0.845588	-0.291003	0.866256	-0.900657	0.387725
TCATACTGACGGTTCCCCACTCGG	TRCN0000465219	C3orf49	chromosome 3 open reading frame 49		132200	ENSG00000163632	0.00535436	0.984733	0.379354	0.47324	-0.1014	0.980692
ATAAAGCACCCGCTCCGACAGGGA	TRCN0000465220	CELF6	CUGBP Elav-like family member 6	RNA binding motif containing	60677	ENSG00000140488	0.224297	0.655383	-0.0989294	0.98312	0.20669	0.999612
ACGCATCCCATACATCCGCCCGGC	TRCN0000465222	PGAP3	post-GPI attachment to proteins 3		93210	ENSG00000161395	0.0883552	0.889452	-0.279	0.950385	0.598354	0.999612
GAATTTTCGTTAAGGGGTCCCCTT	TRCN0000465224	HSD17B3	hydroxysteroid 17-beta dehydrogenase 3	Short chain dehydrogenase/reductase superfamily	3293	ENSG00000130948	0.557057	0.0964765	0.589641	0.760561	1.10251	0.433387
GTCGCAGCGTATTGCCTGGATTGT	TRCN0000465225	ANLN	anillin actin binding protein	Pleckstrin homology domain containing	54443	ENSG00000011426	-0.214111	0.608405	0.346049	0.751177	-0.775051	0.999612
GGCGTAGGCCCCCGCTTTAAAGTG	TRCN0000465226	C5orf46	chromosome 5 open reading frame 46		389336	ENSG00000178776	-0.100676	0.794598	-0.102792	0.972135	0.10613	0.965267
TATGGCCAGAGTCTATGCAAGGAA	TRCN0000465229	FAM217A	family with sequence similarity 217 member A		222826	ENSG00000145975	0.0352989	0.932574	-0.0649118	0.985109	-0.303474	0.912452
ATGACCTGTCCGCCTTCAGTTGTT	TRCN0000465230	KCTD1	potassium channel tetramerization domain containing 1		284252	ENSG00000134504	0.219281	0.5546	0.353999	0.758338	0.611747	0.622194
TTTGATACAAACCTCAAATCAGCC	TRCN0000465231	CDK17	cyclin dependent kinase 17	Cyclin dependent kinases	5128	ENSG00000059758	-0.220371	0.755207	-0.0620118	0.99024	0.233948	0.999612
TCACCTCCAGCAGAACGCTGCTGA	TRCN0000488011	CDK17	cyclin dependent kinase 17	Cyclin dependent kinases	5128	ENSG00000059758	-0.0744285	0.914882	0.452358	0.916776	-0.417532	0.999612
AAGTCCCTTTCATCCGCTTGAGTT	TRCN0000468143	CDK17	cyclin dependent kinase 17	Cyclin dependent kinases	5128	ENSG00000059758	0.455568	0.483087	0.484335	0.926772	0.613063	0.999612
TCGCGGCCTCATCCCCCGAATAAA	TRCN0000465233	ATOX1	antioxidant 1 copper chaperone		475	ENSG00000177556	-0.0723693	0.827709	0.0973051	0.935863	-0.162018	0.95877
CATACCCCGGGCCCCCAGCACACC	TRCN0000465234	ZBTB24	zinc finger and BTB domain containing 24	Zinc fingers C2H2-type|BTB domain containing	9841	ENSG00000112365	-0.219673	0.448306	-0.213048	0.905988	-0.333883	0.885742
GATGCATTTGGTTTGTCTGCCCTC	TRCN0000480386	ZBTB24	zinc finger and BTB domain containing 24	Zinc fingers C2H2-type|BTB domain containing	9841	ENSG00000112365	-0.0854504	0.856436	0.527488	0.711828	0.100466	0.971287
CGGCGTACCTGTGTTTTGATTGAG	TRCN0000465236	DPH3	diphthamide biosynthesis 3		285381	ENSG00000154813	-0.411953	0.0432512	-0.446654	0.400402	-0.706365	0.606518
AATGCATAAGCAGAACTCAGAGTC	TRCN0000465237	LILRA4	leukocyte immunoglobulin like receptor A4	CD molecules|Activating leukocyte immunoglobulin like receptors	23547	ENSG00000239961	0.465581	0.223014	0.0582801	0.997846	0.416156	0.999612
CTAACCAACTGATATACTTTGCAT	TRCN0000471013	EIF4A2	eukaryotic translation initiation factor 4A2	DEAD-box helicases	1974	ENSG00000156976	-0.109492	0.683315	0.113347	0.920195	0.0577182	0.974956
CGGCAGATCCCCCCACGAACCTTC	TRCN0000465238	EIF4A2	eukaryotic translation initiation factor 4A2	DEAD-box helicases	1974	ENSG00000156976	-0.294183	0.2533	-0.52913	0.625714	-0.333981	0.908301
CTTAGCCTAGCTGATTATTTGTTA	TRCN0000465239	CELF5	CUGBP Elav-like family member 5	RNA binding motif containing	60680	ENSG00000161082	-0.0685472	0.903079	-0.0271008	0.997835	-0.229086	0.999612
TAGTGTCAACTCCATCTTCCCAAA	TRCN0000470282	CELF5	CUGBP Elav-like family member 5	RNA binding motif containing	60680	ENSG00000161082	-0.136025	0.717933	0.837498	0.108674	0.921605	0.214185
AGTCTCTTATATATGAATGCAATC	TRCN0000478508	HIKESHI	Hikeshi, heat shock protein nuclear import factor		51501	ENSG00000149196	0.374222	0.247734	0.038393	0.984871	0.233081	0.905835
ATCCTCCAGCGTATTCTTCTACCC	TRCN0000465240	HIKESHI	Hikeshi, heat shock protein nuclear import factor		51501	ENSG00000149196	0.0389615	0.967328	0.172087	0.98312	0.206885	0.999612
AACCCCGAAGTTTGTATTGGCTTT	TRCN0000465242	SIRPA	signal regulatory protein alpha	CD molecules|V-set domain containing|C1-set domain containing|Signal regulatory proteins|Ig-like cell adhesion molecule family	140885	ENSG00000198053	0.107975	0.886917	0.0969154	0.989896	0.0564818	0.999612
CTTGCTTCCATTTGGCCACTCGGC	TRCN0000465243	ZMAT4	zinc finger matrin-type 4	Zinc fingers matrin-type	79698	ENSG00000165061	0.120836	0.560749	0.122405	0.907714	-0.158383	0.962712
ATCCCTACAAAGATCCTGGTGCGA	TRCN0000470289	NCOA4	nuclear receptor coactivator 4		8031	ENSG00000266412	0.340988	0.259094	0.458822	0.586578	0.291112	0.850407
TGGCACCTCTATTGTTGAAATTCC	TRCN0000465244	NCOA4	nuclear receptor coactivator 4		8031	ENSG00000266412	0.0990114	0.819168	-0.645523	0.524799	-0.477653	0.907344
CATTGGAGCGGCCCTTCAGACTAA	TRCN0000473389	SP2	Sp2 transcription factor	Zinc fingers C2H2-type|Sp transcription factors	6668	ENSG00000167182	-0.274984	0.386206	-0.197804	0.926859	0.406929	0.817784
CACGAATGCACACACAACGACCCG	TRCN0000465245	SP2	Sp2 transcription factor	Zinc fingers C2H2-type|Sp transcription factors	6668	ENSG00000167182	-0.211001	0.303278	-0.244514	0.777166	-0.290889	0.880864
TTTCCATTCCCTGTCAACTTAGGG	TRCN0000488288	MAPKAPK5	mitogen-activated protein kinase-activated protein kinase 5	Mitogen-activated protein kinase-activated protein kinases	8550	ENSG00000089022	0.138358	0.850165	0.129462	0.987082	0.468702	0.999612
ATACTCCTTTGTCCGTGTTGTACT	TRCN0000488301	MAPKAPK5	mitogen-activated protein kinase-activated protein kinase 5	Mitogen-activated protein kinase-activated protein kinases	8550	ENSG00000089022	0.188309	0.784888	0.461921	0.9197	0.119097	0.999612
CTAGCATGTCGTGCTTTATCCATG	TRCN0000465246	MAPKAPK5	mitogen-activated protein kinase-activated protein kinase 5	Mitogen-activated protein kinase-activated protein kinases	8550	ENSG00000089022	-0.296508	0.590741	0.110164	0.988129	0.0340263	0.999612
AAGTCTATCAAAAGTCCCATCACT	TRCN0000473802	ACPP	acid phosphatase, prostate	Acid phosphatases	55	ENSG00000014257	0.702107	0.0200306	0.375184	0.911656	1.01334	0.220621
AGGCCGCTTCAGATCCCCCCAATG	TRCN0000465247	ACPP	acid phosphatase, prostate	Acid phosphatases	55	ENSG00000014257	0.127192	0.723082	-0.268964	0.916474	0.35741	0.861834
CTGCCAGGTTTGACATAATTAATT	TRCN0000465248	SEC61A2	Sec61 translocon alpha 2 subunit		55176	ENSG00000065665	-0.795856	0.169821	0.445061	0.951609	-0.800867	0.999612
CATGAGTTGCAACCCAAACGAATT	TRCN0000465249	DSCR9	Down syndrome critical region 9		257203	ENSG00000230366	-0.231106	0.25927	-0.0519271	0.987552	-0.1502	0.960901
ATTATGAATCCCTAAAAGGTGACA	TRCN0000465252	TMED5	transmembrane p24 trafficking protein 5	Transmembrane p24 trafficking proteins	50999	ENSG00000117500	0.672334	0.000146954	0.916394	0.0037883	0.578239	0.473336
ATTTAAAGGTTACAATCGGCATGT	TRCN0000465707	TMED5	transmembrane p24 trafficking protein 5	Transmembrane p24 trafficking proteins	50999	ENSG00000117500	0.502022	0.447941	0.0953053	NA	0.0906154	NA
CTCCACCCCGAGGCCGGGTTTTAG	TRCN0000465253	MYO1C	myosin IC	Myosins, class I	4641	ENSG00000197879	0.00977418	0.990274	-1.4358	0.265233	-0.782549	0.999612
GTCACGATCCTCAATATGTACTGG	TRCN0000465255	GJA3	gap junction protein alpha 3	Gap junction proteins	2700	ENSG00000121743	-0.112371	0.804161	0.226957	0.915375	-0.533435	0.999612
TGGGTTGCTTGTCCAAACATGATT	TRCN0000465256	MPG	N-methylpurine DNA glycosylase	DNA glycosylases	4350	ENSG00000103152	0.196221	0.682436	-0.265547	0.961793	0.0193703	0.999612
CCAGGCGTACTCATATGTTAAATG	TRCN0000465257	RHNO1	RAD9-HUS1-RAD1 interacting nuclear orphan 1		83695	ENSG00000171792	-1.42782	2.76325e-38	-0.282849	0.688664	-0.729018	0.1091
CTAGCTAATTCGCGGACTACCATC	TRCN0000465258	TMED10	transmembrane p24 trafficking protein 10	Transmembrane p24 trafficking proteins	10972	ENSG00000170348	0.0312787	0.901372	-0.156725	0.900226	0.133974	0.851006
CCGTCCAGCCGGTATACATTTAAA	TRCN0000465260	CLDN10	claudin 10	Claudins	9071	ENSG00000134873	0.0143503	0.974753	-0.320717	0.833997	-0.565554	0.734979
CCCGGCCCACGTAACTTCTTTGTG	TRCN0000465261	SLC47A1	solute carrier family 47 member 1	Solute carriers	55244	ENSG00000142494	-0.109749	0.744158	-0.430433	0.798843	-0.675716	0.4932
CAGACGCCTAACCGGGACTACCCC	TRCN0000481487	SLC47A1	solute carrier family 47 member 1	Solute carriers	55244	ENSG00000142494	-0.722881	0.0922123	0.128201	0.98312	0.177853	0.999612
AAGCTCAACACACATATGTCCCAG	TRCN0000489933	SLC47A1	solute carrier family 47 member 1	Solute carriers	55244	ENSG00000142494	-0.0605354	0.935373	0.953303	0.199772	0.981564	0.351314
GATGGAACCCTTTCTCTATATGGT	TRCN0000465262	INTS7	integrator complex subunit 7	Integrator complex|Armadillo-like helical domain containing	25896	ENSG00000143493	0.33181	0.684828	-0.670653	0.911656	1.21825	0.999612
GTATCCACATATGTTTTGTTCTCC	TRCN0000491504	SNX24	sorting nexin 24	Sorting nexins	28966	ENSG00000064652	0.180551	0.450021	0.166223	0.887455	0.539732	0.46754
AGGAATGTTACTACTGCAGGTCGC	TRCN0000465263	SNX24	sorting nexin 24	Sorting nexins	28966	ENSG00000064652	0.122562	0.627396	-0.0010053	0.981516	0.226177	0.817977
TCGCCCCGCTTATTGGGACAGCGC	TRCN0000465265	PPP1R8	protein phosphatase 1 regulatory subunit 8	Protein phosphatase 1 regulatory subunits	5511	ENSG00000117751	-0.31968	0.318595	-0.0147113	0.992845	0.186339	0.92938
CCGGTTTATGTGTTTCTCGGTTTC	TRCN0000465266	BNIP1	BCL2 interacting protein 1	SNAREs|BCL2 homology region 3 (BH3) only	662	ENSG00000113734	-0.255927	0.312741	-0.122531	0.962283	-0.24615	0.941027
TGCACAATCACATTTAATCCTCGT	TRCN0000465267	GCLM	glutamate-cysteine ligase modifier subunit		2730	ENSG00000023909	-0.317794	0.117238	-0.344718	0.725586	-0.258701	0.933535
CTATTTCCCGGATACTTTTTCGAA	TRCN0000465268	NUP210P1	nucleoporin 210 pseudogene 1		255330	ENSG00000198284	0.0723781	0.831924	0.0657634	0.969302	0.0442058	0.977062
GTAGATCGGTAGTCGGGCTAACAC	TRCN0000465269	OTX1	orthodenticle homeobox 1	PRD class homeoboxes and pseudogenes	5013	ENSG00000115507	-0.835195	0.00309388	0.377264	0.766848	0.672513	0.456048
CATAATTAAGGTCCATATACTGTT	TRCN0000465270	GRIA1	glutamate ionotropic receptor AMPA type subunit 1	Glutamate ionotropic receptor AMPA type subunits	2890	ENSG00000155511	-0.27099	0.473349	0.364274	0.87978	0.189074	0.9523
ACCTGAGCTCTACTCTGGTAGCAA	TRCN0000469339	AKR7A3	aldo-keto reductase family 7 member A3	Aldo-keto reductases	22977	ENSG00000162482	-0.0407783	0.932717	-0.650643	0.469372	-0.640676	0.80767
GACACAACAGCATGCGGAGCAAAC	TRCN0000465271	AKR7A3	aldo-keto reductase family 7 member A3	Aldo-keto reductases	22977	ENSG00000162482	-0.187511	0.812651	NA	NA	NA	NA
TAAGAAGCCTATATGGTCTCCTCT	TRCN0000465272	CD7	CD7 molecule	CD molecules|V-set domain containing	924	ENSG00000173762	-0.496315	0.00840285	-0.149597	0.950217	-0.529962	0.690695
ACGGAGATAGTGCAGGTACTCAAA	TRCN0000465273	SUGT1P1	SUGT1 pseudogene 1		441394	ENSG00000226823	0.0763766	0.830919	0.148464	0.927182	0.307981	0.783724
AATTCTCGGGCCTTAAGCACTAAC	TRCN0000465274	TUBA1C	tubulin alpha 1c	Tubulins	84790	ENSG00000167553	0.53459	0.0438649	0.687172	0.465234	0.411747	0.784141
CTGGCGAGGCTTCTGCTGCCTTGG	TRCN0000465275	MAPKAP1	mitogen-activated protein kinase associated protein 1	MTOR complex 2	79109	ENSG00000119487	-0.172683	0.528865	0.173069	0.952922	-0.159478	0.976143
GATCAGAGAATTTTGGATAAAAAA	TRCN0000465276	GALK1	galactokinase 1		2584	ENSG00000108479	0.229147	0.625867	0.350746	0.926772	0.237391	0.999612
TTAACCTATTAGATCGGCCGAGGG	TRCN0000491971	GALK1	galactokinase 1		2584	ENSG00000108479	0.171494	0.835603	0.777541	0.823336	0.398667	0.999612
CCAAACACAGTAAAAGCTACAGCC	TRCN0000488441	GALK1	galactokinase 1		2584	ENSG00000108479	-0.0803295	0.86727	-0.0560362	0.990724	-0.453673	0.999612
ATTGATCGCCACCAACGTAGACCT	TRCN0000479672	GALK1	galactokinase 1		2584	ENSG00000108479	0.318791	0.548635	0.113128	0.98901	0.271714	0.999612
CATCTCTTCCAATATTACACACAT	TRCN0000465277	DYNLL1	dynein light chain LC8-type 1	Dyneins, cytoplasmic	8655	ENSG00000088986	0.0311732	0.913537	0.137544	0.854703	0.105473	0.893855
CGAAGGCTAGCCAATTATGCATAT	TRCN0000472374	HLA-DPB1	major histocompatibility complex, class II, DP beta 1	Histocompatibility complex|C1-set domain containing	3115	ENSG00000223865	0.948539	0.180162	0.0646211	NA	0.0794396	NA
CAGCACTGCACGGCCGCGGCCATT	TRCN0000465278	HLA-DPB1	major histocompatibility complex, class II, DP beta 1	Histocompatibility complex|C1-set domain containing	3115	ENSG00000223865	-0.220019	0.488017	-0.428506	0.743495	-0.336687	0.925009
CCGTACTGCTAGGTGTGGAAGCTA	TRCN0000466727	HLA-DPB1	major histocompatibility complex, class II, DP beta 1	Histocompatibility complex|C1-set domain containing	3115	ENSG00000223865	0.150845	NA	0.518135	0.962513	NA	NA
CAGTTCAGCTACACACAGTAATTT	TRCN0000465280	AAMDC	adipogenesis associated Mth938 domain containing		28971	ENSG00000087884	-0.460818	0.40408	-0.232842	0.981029	-0.826161	0.999612
GCCATTATGCCAACTTATAGTTTG	TRCN0000465281	HOMEZ	homeobox and leucine zipper encoding	ZF class homeoboxes and pseudogenes	57594	ENSG00000215271	0.0486441	0.868064	-0.0803505	0.971364	0.159799	0.927712
TTCCCAGCGCTGCTCTCCTCGTAG	TRCN0000465282	MSMO1	methylsterol monooxygenase 1	Fatty acid hydroxylase domain containing	6307	ENSG00000052802	-0.0500645	0.923914	-0.130919	0.97144	0.18374	0.937729
AGTCCTCGTGCTGAATCCCCGTCT	TRCN0000467314	ATP6V0C	ATPase H+ transporting V0 subunit c	V-type ATPases	527	ENSG00000185883	0.233125	0.578898	0.505003	0.727463	0.326297	0.999612
CTCGCCTAGTACTGAAGGCTCTGC	TRCN0000472683	ATP6V0C	ATPase H+ transporting V0 subunit c	V-type ATPases	527	ENSG00000185883	-0.0221686	0.953218	-0.083474	0.976919	-0.412207	0.82
CGGCTGAAAAAAAGTGGGTGCGAG	TRCN0000465283	ATP6V0C	ATPase H+ transporting V0 subunit c	V-type ATPases	527	ENSG00000185883	-0.289867	0.184008	-0.526276	0.363064	-0.429195	0.636344
TGTTACAAGAGCCCCTCTGACCCG	TRCN0000465284	MIF4GD	MIF4G domain containing		57409	ENSG00000125457	0.0185102	0.967497	-0.368861	0.753236	-0.0573153	0.997861
ATGAAGCAAAAACATACAATAAAT	TRCN0000465286	TCP10L2	t-complex 10 like 2		401285	ENSG00000166984	0.295693	0.64718	0.494759	0.897723	0.899885	0.999612
CCCACCGCCAACCTTGGGCGTTCT	TRCN0000465287	RECK	reversion inducing cysteine rich protein with kazal motifs		8434	ENSG00000122707	-0.0787369	0.846912	-0.441967	0.61583	-0.356987	0.896221
TACTACAGACAATTCTCGAACTGT	TRCN0000473771	HHIPL2	HHIP like 2		79802	ENSG00000143512	-0.0111916	0.980691	-0.0835937	0.972776	0.143662	0.95784
TCGGGGTTTTAGCGGAATGCCGCG	TRCN0000465288	HHIPL2	HHIP like 2		79802	ENSG00000143512	-0.125689	0.762854	-0.122631	0.968934	-0.0728005	0.995647
CATCACCGGTGACCCACTTACAAA	TRCN0000465289	KRT19	keratin 19	Keratins, type I	3880	ENSG00000171345	-0.288315	0.410842	-0.260447	0.90801	-0.241819	0.924731
CTCATCTTCGCTGTGGTCCTGTTG	TRCN0000465290	KRCC1	lysine rich coiled-coil 1		51315	ENSG00000172086	-0.317353	0.244325	-0.0434259	0.98759	0.0316715	0.983832
TTCTACTGACGAGTCGGCTAAACG	TRCN0000481399	CALM2	calmodulin 2	Endogenous ligands|EF-hand domain containing	805	ENSG00000143933	0.275875	0.467233	0.270698	0.883245	0.276836	0.912452
TGGTCACCCCCCTTCGGCACCTGG	TRCN0000465291	CALM2	calmodulin 2	Endogenous ligands|EF-hand domain containing	805	ENSG00000143933	-0.0453315	0.915397	-0.00377008	0.993603	0.0282777	0.987369
GGATCATGATACTATTCGCCTACT	TRCN0000479230	CALM2	calmodulin 2	Endogenous ligands|EF-hand domain containing	805	ENSG00000143933	0.0108852	0.98381	-0.430988	0.791483	-0.202904	0.964374
ACTCTAACATCACAACCATTCACC	TRCN0000470188	CALM2	calmodulin 2	Endogenous ligands|EF-hand domain containing	805	ENSG00000143933	0.191288	0.550433	0.349487	0.783204	-0.248635	0.948588
CTTGTGTCCGAAAAACGAACGGCA	TRCN0000465292	SLC25A48	solute carrier family 25 member 48	Solute carriers	153328	ENSG00000145832	-0.120609	0.725267	-0.291278	0.842825	-0.332904	0.901656
CCTCGATACTTAAATCTGTCCCAA	TRCN0000465293	C2orf88	chromosome 2 open reading frame 88	A-kinase anchoring proteins	84281	ENSG00000187699	-0.085153	0.73825	-0.171198	0.890102	-0.342129	0.854161
CCCGTGTGTCGTACAAGTTACCCT	TRCN0000465294	MPP1	membrane palmitoylated protein 1	Membrane associated guanylate kinases|PDZ domain containing	4354	ENSG00000130830	-0.0842081	0.884491	-0.390855	0.901441	-0.934492	0.999612
AAATGACTTTACGCTTTAAACGAT	TRCN0000474712	MPP1	membrane palmitoylated protein 1	Membrane associated guanylate kinases|PDZ domain containing	4354	ENSG00000130830	0.38065	0.4635	0.542768	0.900024	0.606318	0.999612
TCTCGACCAGTATCGAGGTCTCCA	TRCN0000488461	MPP1	membrane palmitoylated protein 1	Membrane associated guanylate kinases|PDZ domain containing	4354	ENSG00000130830	0.271157	0.584281	0.34312	0.934754	-0.0236343	0.999612
CAGCAGTATATACTTAGGCTTGGT	TRCN0000465295	OTOA	otoancorin	Deafness associated genes	146183	ENSG00000155719	NA	NA	NA	NA	NA	NA
CAAAAGTAGTTTCGTAATGAATAT	TRCN0000465297	C1orf210	chromosome 1 open reading frame 210		149466	ENSG00000253313	-0.1606	0.472729	-0.0507271	0.983713	-0.070548	0.995647
ACAAGTGTAGACGTAAATCTCAAT	TRCN0000465298	FOXR2	forkhead box R2	Forkhead boxes	139628	ENSG00000189299	-1.46281	3.11732e-07	-1.18512	0.0491081	-0.956155	0.615304
GATCACCCTATTTGTGTGCCCGTT	TRCN0000470807	PPP2R3C	protein phosphatase 2 regulatory subunit B''gamma	Protein phosphatase 2 regulatory subunits	55012	ENSG00000092020	0.449163	0.116179	-0.286203	0.878541	0.257358	0.921503
CCTTACTATAAAGAACGGAATGAC	TRCN0000465299	PPP2R3C	protein phosphatase 2 regulatory subunit B''gamma	Protein phosphatase 2 regulatory subunits	55012	ENSG00000092020	-0.232849	0.582327	-0.515755	0.87832	0.237194	0.904064
ACAAGGGACTACCACAAAACGTCA	TRCN0000465301	LCMT1	leucine carboxyl methyltransferase 1	Protein phosphatase 2 modulatory subunits|Seven-beta-strand methyltransferase motif containing	51451	ENSG00000205629	-0.293637	0.446216	-0.565696	0.57947	-0.0745521	0.995289
CCTATTTTTCTCTCATCCACACGT	TRCN0000469584	LCMT1	leucine carboxyl methyltransferase 1	Protein phosphatase 2 modulatory subunits|Seven-beta-strand methyltransferase motif containing	51451	ENSG00000205629	-0.043944	0.921346	-0.0879279	0.970129	0.227789	0.887359
TCTGTCGGGCTGTTCGAGGAATTC	TRCN0000474989	ASB9	ankyrin repeat and SOCS box containing 9	Ankyrin repeat domain containing	140462	ENSG00000102048	0.175343	0.518775	0.0739239	0.965795	-0.314836	0.920668
AGCGCAAGTGCCCGGTGGGACTGC	TRCN0000465302	ASB9	ankyrin repeat and SOCS box containing 9	Ankyrin repeat domain containing	140462	ENSG00000102048	-0.248491	0.184775	-0.10233	0.957076	0.0225597	0.98343
AATTAATGTAGTTTTCACTTTCTC	TRCN0000465304	RRAGC	Ras related GTP binding C		64121	ENSG00000116954	0.785361	0.00279054	0.709059	0.444838	1.16348	0.0814224
CCTCACGCTTGTGAACTCGCTATA	TRCN0000476484	PUS7L	pseudouridine synthase 7 like	Pseudouridine synthases	83448	ENSG00000129317	-0.242194	0.667157	0.547548	0.612489	-0.0655283	0.999612
AACGTATAACAGACTGGCGGCGAA	TRCN0000465305	PUS7L	pseudouridine synthase 7 like	Pseudouridine synthases	83448	ENSG00000129317	0.36957	0.560328	0.186896	0.98312	-0.191389	0.999612
TCCGCGTCGTTCTCTCACTGACAT	TRCN0000465306	SPATC1L	spermatogenesis and centriole associated 1 like		84221	ENSG00000160284	-0.0352086	0.947755	-0.392251	0.89135	-0.034545	0.999612
CCGACAAATGACTTCGTTAGGTGT	TRCN0000465307	NUDT4	nudix hydrolase 4	Nudix hydrolase family	11163	ENSG00000173598	-0.663503	0.000529175	0.103538	0.956456	-0.668001	0.538172
GAGCCAATAGGTTGGGCTGGTAGC	TRCN0000465308	PCBD2	pterin-4 alpha-carbinolamine dehydratase 2		84105	ENSG00000132570	0.108912	0.653977	0.0169256	0.983142	0.273682	0.767944
ATGAAACTCTTAGAACAAGTGTAC	TRCN0000465309	ADAMTSL1	ADAMTS like 1	I-set domain containing|ADAMTS like	92949	ENSG00000178031	0.302126	0.439683	0.00431086	0.999388	0.2526	0.999612
GCACACGTCCTCGGGAGCTTGCGT	TRCN0000465310	FEZ1	fasciculation and elongation protein zeta 1		9638	ENSG00000149557	-0.0250382	0.954693	-0.0718742	0.98275	-0.301175	0.927417
GCCAACATGTGCCCTCTAACCCGT	TRCN0000465311	ENOX2	ecto-NOX disulfide-thiol exchanger 2	RNA binding motif containing	10495	ENSG00000165675	-0.0401714	0.932275	-0.0038417	0.991172	0.2329	0.925009
ACGATTGTTGGAAAAATCTGAGGT	TRCN0000465312	PAM16	presequence translocase associated motor 16	TIM23 complex	51025	ENSG00000217930	0.135415	0.601439	-0.2633	0.843781	0.0927926	0.963899
GCCTACCTGTGCTGAACTGAAAGG	TRCN0000465313	THSD4	thrombospondin type 1 domain containing 4	ADAMTS like	79875	ENSG00000187720	-0.0956608	0.848245	-0.239354	0.924934	0.0372229	0.987998
AGCCAGTACTCTATTCCGAAGGCA	TRCN0000465314	FAM86EP	family with sequence similarity 86 member E, pseudogene		348926	ENSG00000251669	0.0564475	0.86301	-0.338181	0.718698	0.137741	0.941563
ATCCGACCTACTTATATGGAAAGC	TRCN0000465315	NPRL3	NPR3 like, GATOR1 complex subunit	GATOR1 subcomplex	8131	ENSG00000103148	0.173213	0.692938	0.452965	0.749285	-0.308715	0.999612
CTTTACACTATGACCCAGCCACCA	TRCN0000465316	GPATCH2	G-patch domain containing 2	G-patch domain containing|Protein phosphatase 1 regulatory subunits	55105	ENSG00000092978	0.0850528	0.897389	0.00258357	0.998436	0.399176	0.885865
TACGGATACCTTGCGCACCCCACG	TRCN0000465317	DGCR2	DiGeorge syndrome critical region gene 2	C-type lectin domain containing	9993	ENSG00000070413	0.347734	0.155984	-0.0947515	0.975073	-0.238336	0.936414
TGCGTTATCAATCCAACCAGAGTG	TRCN0000468902	FGFRL1	fibroblast growth factor receptor like 1	I-set domain containing|Ig-like cell adhesion molecule family	53834	ENSG00000127418	-0.501137	0.0611859	-0.453169	0.713639	-0.29189	0.941027
TAAAACCAATTAGCCTCCCGTGAG	TRCN0000465318	FGFRL1	fibroblast growth factor receptor like 1	I-set domain containing|Ig-like cell adhesion molecule family	53834	ENSG00000127418	-0.23559	0.627499	-0.271612	0.90801	0.0358309	0.987369
GTGTTCTATATCCATCTATCCCTC	TRCN0000479989	FGFRL1	fibroblast growth factor receptor like 1	I-set domain containing|Ig-like cell adhesion molecule family	53834	ENSG00000127418	0.22348	0.581449	0.487084	0.720683	0.321283	0.999612
GGACCGAGACGTCTTAACCAATAT	TRCN0000465319	SMPDL3A	sphingomyelin phosphodiesterase acid like 3A		10924	ENSG00000172594	0.0347653	0.91999	0.0474771	0.969676	-0.305874	0.923861
TCTATGAGACGTCATCGCGGCCTG	TRCN0000465320	APEX1	apurinic/apyrimidinic endodeoxyribonuclease 1	SET complex	328	ENSG00000100823	0.0657477	0.833236	0.287839	0.740156	0.0453815	0.977062
TGCCGGACAAGCGTGTTTTGAGGA	TRCN0000481321	APEX1	apurinic/apyrimidinic endodeoxyribonuclease 1	SET complex	328	ENSG00000100823	-0.340517	0.0505083	-0.442742	0.535161	-0.760747	0.218702
ACTGATACGCAAATTACATGTGGA	TRCN0000465321	LIPF	lipase F, gastric type	Lipases	8513	ENSG00000182333	0.31435	0.380375	0.335113	0.790735	0.14918	0.96242
CTCTGAGACGCTGCAATCGACGAT	TRCN0000465322	TMEM35A	transmembrane protein 35A		59353	ENSG00000126950	-0.437825	0.0300832	0.00297945	0.983838	0.223051	0.854198
CACTGGCTCCTTCTACCGCATGGG	TRCN0000465323	NAP1L1	nucleosome assembly protein 1 like 1		4673	ENSG00000187109	-0.156595	0.671665	-0.617758	0.585357	0.00498678	0.99161
TTTCGGCACTACCTGGTCAGCATA	TRCN0000465325	VAPB	VAMP associated protein B and C		9217	ENSG00000124164	0.419593	0.042508	0.402146	0.593839	0.382574	0.729034
GCAGATTCCGCATCTGCAATCATT	TRCN0000491253	HSPB8	heat shock protein family B (small) member 8	Small heat shock proteins	26353	ENSG00000152137	-0.122614	0.758142	0.242802	0.91028	0.157797	0.949206
AGAGGAATTTTACTATTGCCGGAT	TRCN0000479643	HSPB8	heat shock protein family B (small) member 8	Small heat shock proteins	26353	ENSG00000152137	0.0516205	0.928402	-0.0401927	0.99024	-0.207589	0.999612
GCCTATTAACACACTAGCACTATA	TRCN0000465326	HSPB8	heat shock protein family B (small) member 8	Small heat shock proteins	26353	ENSG00000152137	0.0621165	0.927055	0.0725188	0.991549	0.189587	0.999612
TATGCTCCCACTTTCACTCCAGTA	TRCN0000465327	CNPPD1	cyclin Pas1/PHO80 domain containing 1		27013	ENSG00000115649	-0.0644029	0.900147	0.191869	0.933666	-0.26352	0.944376
GAACATATCAGACCAACTTTGTCT	TRCN0000478389	CNPPD1	cyclin Pas1/PHO80 domain containing 1		27013	ENSG00000115649	0.203043	0.555199	0.0872794	0.961107	-0.331021	0.940776
ATCGAATCGTCGATAAACGTCTCT	TRCN0000489347	FCER1G	Fc fragment of IgE receptor Ig		2207	ENSG00000158869	0.256942	0.52776	0.399955	0.760882	0.412932	0.838195
CGGGGACCCTCTCATCGACTCACT	TRCN0000465328	FCER1G	Fc fragment of IgE receptor Ig		2207	ENSG00000158869	-0.266779	0.168555	-0.330869	0.67433	-0.555968	0.552466
TACTTCCACCACCCCACACTTTTC	TRCN0000465329	KLHDC3	kelch domain containing 3		116138	ENSG00000124702	0.160976	0.369072	0.0445094	0.965223	-0.0055447	0.990466
AACAAGGCGTGAACCCCAGCCCAC	TRCN0000480272	KLHDC3	kelch domain containing 3		116138	ENSG00000124702	0.173458	0.770337	0.206953	0.970724	0.127807	0.999612
ACCGTGAAACGTCGCCTACGCACT	TRCN0000466758	KLHDC3	kelch domain containing 3		116138	ENSG00000124702	0.111603	0.850132	-0.494635	0.87832	0.172375	0.957527
CGATGGGTATCCCTGACTGTTAGA	TRCN0000465330	EAF1	ELL associated factor 1		85403	ENSG00000144597	-0.178482	0.509421	-0.275276	0.87519	-0.576168	0.701542
TCACCCGTAGTGGTGCCTTATAAC	TRCN0000492173	CAMKK1	calcium/calmodulin dependent protein kinase kinase 1		84254	ENSG00000004660	0.129163	0.808171	-0.20156	0.971138	-0.708017	0.999612
ATTGTATTCATGGAATAGACGTCA	TRCN0000465332	CAMKK1	calcium/calmodulin dependent protein kinase kinase 1		84254	ENSG00000004660	0.148199	0.822249	0.560844	0.885672	-0.0427107	0.999612
ATTAGACTCCTCTTTCGAACACGT	TRCN0000491493	CAMKK1	calcium/calmodulin dependent protein kinase kinase 1		84254	ENSG00000004660	0.520794	0.381551	0.616575	0.878708	1.00369	0.999612
GTTTCAGGAACTATCAATATATTA	TRCN0000472786	CAMKK1	calcium/calmodulin dependent protein kinase kinase 1		84254	ENSG00000004660	0.255489	0.654288	0.193259	0.98066	-0.0184764	0.999612
GGTATGAGCGCGGTGGTCAGGCCT	TRCN0000465333	MTERF1	mitochondrial transcription termination factor 1		7978	ENSG00000127989	-0.207503	0.461232	0.0578233	0.963305	-0.259257	0.927236
AATATATACATACAGGCTTACCTG	TRCN0000478788	MTERF1	mitochondrial transcription termination factor 1		7978	ENSG00000127989	0.806173	0.00639742	0.405486	0.897723	0.739488	0.999612
ACGTCGTCGTCGGAAGCTCCGACC	TRCN0000465334	S100A16	S100 calcium binding protein A16	S100 calcium binding proteins|EF-hand domain containing	140576	ENSG00000188643	0.128491	0.813882	-0.0450847	0.98927	-0.0449084	0.999612
ACTGCCCCGGTTCACTACGAAAGA	TRCN0000465336	FAM177A1	family with sequence similarity 177 member A1		283635	ENSG00000151327	0.157904	0.507371	0.12655	0.899637	0.1148	0.930629
CCGAGAAACCACCATATCACACGT	TRCN0000472858	CENPA	centromere protein A	Constitutive centromere associated network	1058	ENSG00000115163	-0.25416	0.148222	-0.138329	0.949574	-0.238171	0.921505
GTCAAATGTCTTGGATAACAATGT	TRCN0000465337	CENPA	centromere protein A	Constitutive centromere associated network	1058	ENSG00000115163	0.144254	0.477188	0.155521	0.885185	0.461074	0.391319
GATCTCGCCGAGCCAAACTTGCCT	TRCN0000465338	MSI2	musashi RNA binding protein 2	RNA binding motif containing	124540	ENSG00000153944	0.587044	0.196508	0.210313	0.976239	-0.278187	0.999612
CTGACGCTGTAATCCCGACCACGA	TRCN0000468295	MSI2	musashi RNA binding protein 2	RNA binding motif containing	124540	ENSG00000153944	0.114847	0.726448	-0.073162	0.980937	-0.349057	0.892326
GCAAGTGGATTTAGGATTTTGTCT	TRCN0000465339	RPL34	ribosomal protein L34	L ribosomal proteins	6164	ENSG00000109475	0.0447923	0.923395	-0.422371	0.839996	0.00948657	0.993275
AACGATCCGCACGGGGCTGGTTCT	TRCN0000465340	P2RX5	purinergic receptor P2X 5	Purinergic receptors P2X|Minor histocompatibility antigens	5026	ENSG00000083454	0.456213	0.370698	0.426839	0.934096	-0.145237	0.999612
TGGATACTAGCATGCCCCTATGTG	TRCN0000465341	RBMX	RNA binding motif protein X-linked	RNA binding motif containing	27316	ENSG00000147274	-0.317061	0.335462	-0.343821	0.781883	0.21533	0.894333
CTCCTTCTTTCGTAAAACACAACA	TRCN0000465342	JAK3	Janus kinase 3	Jak family tyrosine kinases	3718	ENSG00000105639	0.153284	0.842979	0.10284	0.99024	-0.236219	0.999612
GGAACCGAGAATTTTTTAAATAAA	TRCN0000488116	JAK3	Janus kinase 3	Jak family tyrosine kinases	3718	ENSG00000105639	0.0658833	0.954694	0.316199	0.969338	-1.12162	0.999612
GAGTGCTGAAGTGTGACTTTCTCC	TRCN0000488408	JAK3	Janus kinase 3	Jak family tyrosine kinases	3718	ENSG00000105639	-0.0278039	0.975642	-0.0349593	0.998436	0.108206	0.999612
ATCTACGCTAGAGACGCTCTGGCC	TRCN0000479534	JAK3	Janus kinase 3	Jak family tyrosine kinases	3718	ENSG00000105639	-0.125975	0.884713	0.351259	0.965993	0.386782	0.999612
GCCTTGGGAGACATTCGGCGACTC	TRCN0000465344	JPT1	Jupiter microtubule associated homolog 1		51155	ENSG00000189159	0.177425	0.432822	0.117345	0.943253	0.0341	0.978193
ACAAAGGCTTGAAGTAACCCCAAC	TRCN0000465345	TEKT4	tektin 4	Tektins	150483	ENSG00000163060	0.218003	0.587941	-0.0715442	0.985566	-0.563116	0.999612
TAGGGTCCGCGCCGTGCGTGGTAC	TRCN0000465348	TMCC2	transmembrane and coiled-coil domain family 2	Transmembrane and coiled-coil domain containing	9911	ENSG00000133069	0.186039	0.569265	0.114524	0.951678	-0.162139	0.975698
TCTAAAATACATGATCTGAAATTC	TRCN0000465350	ANGPTL4	angiopoietin like 4	Fibrinogen C domain containing|Angiopoietin like	51129	ENSG00000167772	0.0871343	0.816907	-0.213199	0.902663	0.0245872	0.990466
GCGCTCTGATTACTGATGGCAGGT	TRCN0000465351	YIPF5	Yip1 domain family member 5	Yip1 domain containing	81555	ENSG00000145817	NA	NA	NA	NA	0.769862	0.999612
CGATCACCGATGTAAGTTTATTTC	TRCN0000469667	GTF2IRD2B	GTF2I repeat domain containing 2B		389524	ENSG00000174428	-0.271347	0.201117	0.323419	0.875932	-0.346809	0.832718
CAAGAACGGTTTTTTCTGCCATGC	TRCN0000475879	GTF2IRD2B	GTF2I repeat domain containing 2B		389524	ENSG00000174428	-0.458258	0.228634	-0.951196	0.49273	-0.66404	0.999612
GATGGCAATATAAGTGATGTTCTC	TRCN0000465352	GTF2IRD2B	GTF2I repeat domain containing 2B		389524	ENSG00000174428	NA	NA	NA	NA	NA	NA
ACTAATAACATTGGTCCGTTAACG	TRCN0000465353	ASS1	argininosuccinate synthase 1		445	ENSG00000130707	0.131693	0.819168	0.403309	0.823262	-0.653166	0.999612
CCTCTCAAATCGAGATCTGATGTC	TRCN0000467990	ASS1	argininosuccinate synthase 1		445	ENSG00000130707	-0.333886	0.114894	0.0249816	0.986071	-0.155382	0.968238
TGCGAGTGCCCGGAAGGCCCCTTA	TRCN0000465354	CLDND1	claudin domain containing 1		56650	ENSG00000080822	-0.27427	0.391735	-0.118016	0.96409	-0.863944	0.999612
TTGATTTCCAGTGCGAGAAGACCG	TRCN0000465355	HMX2	H6 family homeobox 2	NKL subclass homeoboxes and pseudogenes	3167	ENSG00000188816	0.91379	0.00567163	0.445288	0.909759	0.294558	0.999612
CTTACTCGAGAAGCCTAGGAGATG	TRCN0000465358	ZNF302	zinc finger protein 302	Zinc fingers C2H2-type	55900	ENSG00000089335	0.612047	0.58484	NA	NA	1.36978	0.999612
TCTCCCACCTAGTGTCGCATCTTA	TRCN0000478438	HSP90AA1	heat shock protein 90 alpha family class A member 1	Heat shock 90kDa proteins	3320	ENSG00000080824	0.645143	0.148828	-0.0498524	0.99024	-0.0600997	0.999612
TGGTCTACGAGAATGCGCTCGCGA	TRCN0000465359	HSP90AA1	heat shock protein 90 alpha family class A member 1	Heat shock 90kDa proteins	3320	ENSG00000080824	0.0486848	0.952932	-0.214317	0.970598	0.339375	0.999612
TTTCTCGGTTCTGGTCGACCCTAT	TRCN0000491541	HSP90AA1	heat shock protein 90 alpha family class A member 1	Heat shock 90kDa proteins	3320	ENSG00000080824	0.442963	0.346367	0.454851	0.920175	-0.203608	0.999612
AGACAGAAGGTACACGGATGGCGA	TRCN0000465360	ECH1	enoyl-CoA hydratase 1		1891	ENSG00000104823	-0.20528	0.670223	0.0192915	0.999811	-0.162133	0.999612
CACACGATAAGACCAAAGCAAGTG	TRCN0000465361	P2RY2	purinergic receptor P2Y2	P2Y receptors	5029	ENSG00000175591	-1.03449	0.00109288	0.490606	0.656636	1.15714	0.061635
GCTTTAGCACGCGGGGGTTGGAAG	TRCN0000491893	P2RY2	purinergic receptor P2Y2	P2Y receptors	5029	ENSG00000175591	-0.575593	0.332874	0.773777	0.545118	0.797819	0.999612
CCAAATCTATTTCTGTATCAGGAC	TRCN0000489343	P2RY2	purinergic receptor P2Y2	P2Y receptors	5029	ENSG00000175591	-0.86821	1.44318e-05	0.372714	0.660391	0.809374	0.163896
GGAACCTTAGAGGTTGTACTTGTC	TRCN0000465787	P2RY2	purinergic receptor P2Y2	P2Y receptors	5029	ENSG00000175591	-0.661724	0.0876896	0.756427	0.184201	1.21016	0.00913488
CCGTTCCGGCGGTTCACGTTACCG	TRCN0000465363	PLA2G1B	phospholipase A2 group IB	Phospholipases	5319	ENSG00000170890	0.0718332	0.825394	-0.0961704	0.972991	0.0226887	0.987369
ATAAGTCACATGACGACTGCGCCG	TRCN0000479491	PLA2G1B	phospholipase A2 group IB	Phospholipases	5319	ENSG00000170890	0.205664	0.657576	0.130798	0.984912	0.336645	0.999612
GTCTTCGCCATCGCGTTCTGGAAC	TRCN0000465365	DOC2A	double C2 domain alpha	Synaptotagmin like tandem C2 proteins	8448	ENSG00000149927	0.281094	0.521132	0.400542	0.80713	0.805003	0.50501
GAAGTCACCAAGTGTTCGATTCTC	TRCN0000491659	ETNK2	ethanolamine kinase 2		55224	ENSG00000143845	0.189598	0.692685	0.144115	0.98312	0.0551351	0.999612
CATTCTTCTTCGGCTCAAGACAAA	TRCN0000465366	ETNK2	ethanolamine kinase 2		55224	ENSG00000143845	0.0159124	0.978285	0.29649	0.878615	0.428294	0.999612
CGATAACATCTCGACTATGCAATA	TRCN0000471464	PXK	PX domain containing serine/threonine kinase like		54899	ENSG00000168297	-0.175001	0.633257	-0.392514	0.773359	-0.0115294	0.994678
CCCCCTCCTCTAAACAATTGGTAC	TRCN0000465367	PXK	PX domain containing serine/threonine kinase like		54899	ENSG00000168297	-0.124533	0.747167	-0.268469	0.916159	-0.112742	0.991618
GCCACGCCGAGCGCAGACTGGTCG	TRCN0000465369	DYRK3	dual specificity tyrosine phosphorylation regulated kinase 3		8444	ENSG00000143479	-0.287895	0.466635	-0.423191	0.825665	-0.451109	0.999612
ATCAGCGTATACCTCCCCGCCGTT	TRCN0000473061	DYRK3	dual specificity tyrosine phosphorylation regulated kinase 3		8444	ENSG00000143479	0.183266	0.691722	0.210027	0.969338	-0.339707	0.999612
CGTATGGTGGTGTCTAAAAGTCGA	TRCN0000488254	DYRK3	dual specificity tyrosine phosphorylation regulated kinase 3		8444	ENSG00000143479	-0.57804	0.0169468	-0.416567	0.741533	-0.335976	0.914137
CTTTACCTAAGATGTTAGGCTCAT	TRCN0000489870	DYRK3	dual specificity tyrosine phosphorylation regulated kinase 3		8444	ENSG00000143479	-0.0688183	NA	-0.0001164	NA	1.50461	0.999612
ACCTCTACGGAGATGCGAGGACGA	TRCN0000465370	SDF2L1	stromal cell derived factor 2 like 1		23753	ENSG00000128228	-0.112307	0.768316	-0.00912958	0.995303	0.0229601	0.988972
GTTCGGCAACTTGGTCATTCCTGG	TRCN0000465371	CUL3	cullin 3	Cullins	8452	ENSG00000036257	-0.119928	0.906099	0.0220095	0.999652	-0.34351	0.999612
CCGACGGGGCTAGTGATCGCCAGG	TRCN0000465372	WFDC11	WAP four-disulfide core domain 11	WAP four-disulfide core domain containing	259239	ENSG00000180083	-0.324961	0.0600407	-0.447366	0.473098	-0.570226	0.621273
AGCACGGGCACTTTCCCCGGGACC	TRCN0000465373	NHLRC1	NHL repeat containing E3 ubiquitin protein ligase 1	Ring finger proteins	378884	ENSG00000187566	0.0107234	0.97726	0.256977	0.854308	0.0995865	0.96242
AAGCCATATTTCATAACCAGGTTG	TRCN0000465374	SPINT1	serine peptidase inhibitor, Kunitz type 1		6692	ENSG00000166145	0.0568645	0.930144	0.154575	0.983023	0.828433	0.999612
TAACGATTTAATCCCGCAGACTTT	TRCN0000465375	CCDC148	coiled-coil domain containing 148		130940	ENSG00000153237	0.199655	0.596707	0.182542	0.925011	0.0482321	0.98343
TCCTATATCCCGTTATGGATGAAT	TRCN0000472539	CCDC148	coiled-coil domain containing 148		130940	ENSG00000153237	NA	NA	0.0126577	NA	NA	NA
CGCAATTACCGCCGTCAACACTGT	TRCN0000465376	MAP3K6	mitogen-activated protein kinase kinase kinase 6	Mitogen-activated protein kinase kinase kinases	9064	ENSG00000142733	0.0798839	0.940621	-0.49673	0.934741	NA	NA
TGATCAGTTTTTGCCATGAGCGTT	TRCN0000481050	MAP3K6	mitogen-activated protein kinase kinase kinase 6	Mitogen-activated protein kinase kinase kinases	9064	ENSG00000142733	-0.322327	0.632791	-0.699212	0.911656	NA	NA
CTCCGATCCCGCGCCATTGGAACA	TRCN0000489757	BMPR1A	bone morphogenetic protein receptor type 1A	Type 1 receptor serine/threonine kinases|CD molecules	657	ENSG00000107779	-0.0280723	0.959666	-0.049886	0.990291	0.0530012	0.981147
[truncated: 16,785 more rows]
