# Supplementary material for: Pooled Genomic Screens Identify Anti-apoptotic Genes as Targetable Mediators of Chemotherapy Resistance in Ovarian Cancer
Source: Oxford University Press journal article supplement (doi:10.1158/1541-7786.mcr-18-1243), 2019-08-28
Supplement: 15417786mcr181243-sup-212398_3_supp_5704740_pw3r8y.xlsx [file 15417786mcr181243-sup-212398_3_supp_5704740_pw3r8y.xlsx]

## Sheet: Candidate hits set 1
Candidate ORF construct hits with log-fold change (LFC) >0.5 and q-value <0.001 in primary overexpression screen
Construct ID	Gene Symbol	Description
TRCN0000468770	OOSP2	oocyte secreted protein 2
TRCN0000489920	BCL2L1	BCL2-like 1
TRCN0000466971	BCL2L2	BCL2-like 2
TRCN0000480858	MAGEA10	melanoma antigen family A, 10
TRCN0000489785	GPR139	G protein-coupled receptor 139
TRCN0000475659	ZNF645	zinc finger protein 645
TRCN0000489662	BCL2	B-cell CLL/lymphoma 2
TRCN0000491973	AGTR1	angiotensin II receptor, type 1
TRCN0000480720	PKNOX1	PBX/knotted 1 homeobox 1
TRCN0000489784	GHSR	growth hormone secretagogue receptor
TRCN0000469090	CEBPE	CCAAT/enhancer binding protein (C/EBP), epsilon
TRCN0000468709	TOB1	transducer of ERBB2, 1
TRCN0000470441	HAND2	heart and neural crest derivatives expressed 2
TRCN0000470411	MAS1	MAS1 proto-oncogene, G protein-coupled receptor
TRCN0000474411	EGR2	early growth response 2
TRCN0000481111	PTGFR	prostaglandin F receptor (FP)
TRCN0000466205	PLSCR4	phospholipid scramblase 4
TRCN0000491707	CDX2	caudal type homeobox 2
TRCN0000481563	GPR52	G protein-coupled receptor 52
TRCN0000473508	SOX2	SRY (sex determining region Y)-box 2
TRCN0000472265	CRB3	crumbs homolog 3 (Drosophila)
TRCN0000488012	MRGPRX4	MAS-related GPR, member X4
TRCN0000477267	GLRA1	glycine receptor, alpha 1
TRCN0000479485	LIF	leukemia inhibitory factor
TRCN0000477457	YAP1	Yes-associated protein 1
TRCN0000489844	CHRM3	cholinergic receptor, muscarinic 3
TRCN0000468113	C1orf50	chromosome 1 open reading frame 50
TRCN0000489001	P2RY6	pyrimidinergic receptor P2Y, G-protein coupled, 6
TRCN0000487816	GPR139	G protein-coupled receptor 139
TRCN0000469471	KIAA1598	KIAA1598
TRCN0000481113	PRKRA	protein kinase, interferon-inducible double stranded RNA dependent activator
TRCN0000475973	GPR139	G protein-coupled receptor 139
TRCN0000475067	PRSS50	protease, serine, 50
TRCN0000478056	IRX6	iroquois homeobox 6
TRCN0000488887	SLC10A1	solute carrier family 10 (sodium/bile acid cotransporter), member 1
TRCN0000467220	PPAPDC1B	phosphatidic acid phosphatase type 2 domain containing 1B
TRCN0000473478	SOX15	SRY (sex determining region Y)-box 15
TRCN0000475655	HOXD10	homeobox D10
TRCN0000475598	CDX4	caudal type homeobox 4
TRCN0000466558	SNRNP40	small nuclear ribonucleoprotein 40kDa (U5)
TRCN0000489273	NR2E1	nuclear receptor subfamily 2, group E, member 1
TRCN0000487803	MRGPRX4	MAS-related GPR, member X4
TRCN0000488234	MAS1	MAS1 proto-oncogene, G protein-coupled receptor
TRCN0000471409	ISG20	interferon stimulated exonuclease gene 20kDa
TRCN0000481607	TFAP2A	transcription factor AP-2 alpha (activating enhancer binding protein 2 alpha)
TRCN0000467237	LYSMD2	LysM, putative peptidoglycan-binding, domain containing 2
TRCN0000489626	CRHR1	corticotropin releasing hormone receptor 1
TRCN0000489359	HRH1	histamine receptor H1
TRCN0000489925	PTGFR	prostaglandin F receptor (FP)
TRCN0000489110	CRHR1	corticotropin releasing hormone receptor 1
TRCN0000468087	C15orf41	chromosome 15 open reading frame 41
TRCN0000466615	MGST1	microsomal glutathione S-transferase 1
TRCN0000468215	MRGPRX4	MAS-related GPR, member X4
TRCN0000487755	TMEM11	transmembrane protein 11
TRCN0000478294	RAB31	RAB31, member RAS oncogene family
TRCN0000475880	CELF3	CUGBP, Elav-like family member 3
TRCN0000491554	CHRM1	cholinergic receptor, muscarinic 1
TRCN0000481385	C20orf85	chromosome 20 open reading frame 85
TRCN0000488087	PNLIP	pancreatic lipase
TRCN0000489955	CD59	CD59 molecule, complement regulatory protein
TRCN0000474440	ERLIN2	ER lipid raft associated 2
TRCN0000465727	CRYGB	crystallin, gamma B
TRCN0000478038	CD276	CD276 molecule
TRCN0000472820	ARL6IP6	ADP-ribosylation-like factor 6 interacting protein 6
TRCN0000471039	MCCC2	methylcrotonoyl-CoA carboxylase 2 (beta)
TRCN0000474432	EGFL7	EGF-like-domain, multiple 7
TRCN0000488873	ABCB1	ATP-binding cassette, sub-family B (MDR/TAP), member 1	*EXCLUDED
TRCN0000474785	NKX2-5	NK2 homeobox 5
TRCN0000473699	HIST1H4H	histone cluster 1 H4 family member h
TRCN0000488706	GPR139	G protein-coupled receptor 139
TRCN0000477247	C17orf51	chromosome 17 open reading frame 51
TRCN0000471385	LIPT1	lipoyltransferase 1
TRCN0000467786	FTSJ1	FtsJ RNA methyltransferase homolog 1 (E. coli)
TRCN0000488175	GHSR	growth hormone secretagogue receptor
TRCN0000489536	P2RY6	pyrimidinergic receptor P2Y, G-protein coupled, 6
TRCN0000477892	FAM78B	family with sequence similarity 78, member B
TRCN0000480394	RDM1	RAD52 motif 1
TRCN0000489280	P2RY4	pyrimidinergic receptor P2Y, G-protein coupled, 4
TRCN0000489748	PTGFR	prostaglandin F receptor (FP)
TRCN0000468434	ITM2A	integral membrane protein 2A
TRCN0000476606	CLEC4A	C-type lectin domain family 4, member A
TRCN0000487723	GPR68	G protein-coupled receptor 68
TRCN0000468803	MAS1	MAS1 proto-oncogene, G protein-coupled receptor
TRCN0000473127	GLRA3	glycine receptor, alpha 3
TRCN0000479993	PRSS21	protease, serine, 21 (testisin)
TRCN0000475112	CNOT7	CCR4-NOT transcription complex, subunit 7
TRCN0000492142	GPR137B	G protein-coupled receptor 137B
TRCN0000471076	RNF182	ring finger protein 182
TRCN0000478908	MBNL2	muscleblind-like splicing regulator 2
TRCN0000481461	C14orf177	chromosome 14 open reading frame 177
TRCN0000474925	LCOR	ligand dependent nuclear receptor corepressor
TRCN0000469674	MITF	microphthalmia-associated transcription factor
TRCN0000478807	HOXB5	homeobox B5
TRCN0000465252	TMED5	transmembrane emp24 protein transport domain containing 5
TRCN0000469547	DAOA	D-amino acid oxidase activator
TRCN0000473760	USP36	ubiquitin specific peptidase 36
TRCN0000488169	KRAS	Kirsten rat sarcoma viral oncogene homolog
TRCN0000480202	SLC8B1	solute carrier family 8 (sodium/lithium/calcium exchanger), member B1
TRCN0000469164	GNRHR	gonadotropin-releasing hormone receptor
TRCN0000489830	PRKRA	protein kinase, interferon-inducible double stranded RNA dependent activator
TRCN0000477257	GNS	glucosamine (N-acetyl)-6-sulfatase
TRCN0000473688	C1D	C1D nuclear receptor corepressor
TRCN0000476461	NPEPPS	aminopeptidase puromycin sensitive
TRCN0000479421	GPR68	G protein-coupled receptor 68
TRCN0000478756	KATNAL1	katanin p60 subunit A-like 1
TRCN0000468748	RAB30	RAB30, member RAS oncogene family
TRCN0000473177	SPEM1	spermatid maturation 1
TRCN0000476507	MRPL52	mitochondrial ribosomal protein L52
TRCN0000469752	SUN3	Sad1 and UNC84 domain containing 3
TRCN0000478738	IGF2	insulin-like growth factor 2 (somatomedin A)
TRCN0000491641	OR2T33	olfactory receptor, family 2, subfamily T, member 33
TRCN0000466741	SPSB2	splA/ryanodine receptor domain and SOCS box containing 2
TRCN0000477808	NO_MATCH_5	NA
TRCN0000489905	OXER1	oxoeicosanoid (OXE) receptor 1
TRCN0000467871	MBNL1	muscleblind-like splicing regulator 1
TRCN0000469325	C17orf62	chromosome 17 open reading frame 62
TRCN0000471194	PRDM14	PR domain containing 14
TRCN0000475932	C20orf166-AS1	NA
TRCN0000473361	AGPAT6	1-acylglycerol-3-phosphate O-acyltransferase 6
TRCN0000478133	RSPH1	radial spoke head 1 homolog (Chlamydomonas)
TRCN0000479961	SCP2D1	SCP2 sterol-binding domain containing 1
TRCN0000474949	NAA30	N(alpha)-acetyltransferase 30, NatC catalytic subunit
TRCN0000466832	SELENBP1	selenium binding protein 1
TRCN0000488878	BRS3	bombesin-like receptor 3
TRCN0000487862	NPY6R	neuropeptide Y receptor Y6 (pseudogene)
TRCN0000467329	AMIGO1	adhesion molecule with Ig-like domain 1
TRCN0000467026	KRTAP10-3	keratin associated protein 10-3
TRCN0000487975	TFE3	transcription factor binding to IGHM enhancer 3
TRCN0000488895	GPR148	G protein-coupled receptor 148
TRCN0000467081	RAB3A	RAB3A, member RAS oncogene family
TRCN0000469686	ATP6V1E2	ATPase, H+ transporting, lysosomal 31kDa, V1 subunit E2
TRCN0000489508	CHRM5	cholinergic receptor, muscarinic 5
TRCN0000488143	MRGPRD	MAS-related GPR, member D
TRCN0000470423	CCDC109B	coiled-coil domain containing 109B
TRCN0000472951	SLC35G2	solute carrier family 35, member G2
TRCN0000478724	CLEC12A	C-type lectin domain family 12, member A
TRCN0000478775	WBP1	WW domain binding protein 1
TRCN0000466913	RBFOX1	RNA binding protein, fox-1 homolog (C. elegans) 1
TRCN0000478887	PIK3IP1	phosphoinositide-3-kinase interacting protein 1
TRCN0000489029	GPSM3	G-protein signaling modulator 3
TRCN0000470460	GPR18	G protein-coupled receptor 18
TRCN0000476429	TMEM129	transmembrane protein 129
TRCN0000487679	MRGPRD	MAS-related GPR, member D
TRCN0000467387	RNF125	ring finger protein 125, E3 ubiquitin protein ligase
TRCN0000471310	TPRKB	TP53RK binding protein
TRCN0000467165	C20orf141	chromosome 20 open reading frame 141
TRCN0000477560	TPRN	taperin
TRCN0000470280	POU2F2	POU class 2 homeobox 2
TRCN0000488150	GPR148	G protein-coupled receptor 148
TRCN0000492071	FPR2	formyl peptide receptor 2
TRCN0000470161	GAS2	growth arrest-specific 2
TRCN0000466654	GPSM3	G-protein signaling modulator 3
TRCN0000489456	IDO1	indoleamine 2,3-dioxygenase 1
TRCN0000472802	MAB21L2	mab-21-like 2 (C. elegans)
TRCN0000478063	SPAST	spastin
TRCN0000469116	EIF2B1	eukaryotic translation initiation factor 2B, subunit 1 alpha, 26kDa
TRCN0000488298	XCR1	chemokine (C motif) receptor 1
TRCN0000489192	GPR68	G protein-coupled receptor 68
TRCN0000468052	GPR4	G protein-coupled receptor 4
TRCN0000475749	LMX1B	LIM homeobox transcription factor 1, beta
TRCN0000488276	GPR141	G protein-coupled receptor 141
TRCN0000489839	SLC22A4	solute carrier family 22 (organic cation/zwitterion transporter), member 4
TRCN0000481285	ZNF645	zinc finger protein 645
TRCN0000471175	ELAVL2	ELAV like neuron-specific RNA binding protein 2
TRCN0000489751	CHRM3	cholinergic receptor, muscarinic 3
TRCN0000477890	RHOXF2	Rhox homeobox family, member 2
TRCN0000478698	AUNIP	aurora kinase A and ninein interacting protein
TRCN0000469750	FCRLA	Fc receptor-like A
TRCN0000472033	TLE1	transducin-like enhancer of split 1 (E(sp1) homolog, Drosophila)
TRCN0000477752	TMEM92	transmembrane protein 92
TRCN0000477788	SLC9A1	solute carrier family 9, subfamily A (NHE1, cation proton antiporter 1), member 1
TRCN0000474542	VENTX	VENT homeobox
TRCN0000475374	JAGN1	jagunal homolog 1 (Drosophila)
TRCN0000470093	OR1D4	olfactory receptor, family 1, subfamily D, member 4 (gene/pseudogene)
TRCN0000466646	ZNF513	zinc finger protein 513
TRCN0000488582	MTNR1A	melatonin receptor 1A
TRCN0000479505	LHX9	LIM homeobox 9
TRCN0000479953	MEOX2	mesenchyme homeobox 2
TRCN0000492299	SLC7A8	solute carrier family 7 (amino acid transporter light chain, L system), member 8
TRCN0000488600	MAD2L1	mitotic arrest deficient 2 like 1
TRCN0000489942	HHEX	hematopoietically expressed homeobox
TRCN0000489097	GABRR1	gamma-aminobutyric acid (GABA) A receptor, rho 1
TRCN0000477155	FMO4	flavin containing monooxygenase 4
TRCN0000478359	NSG1	neuronal vesicle trafficking associated 1
TRCN0000479594	TMEM171	transmembrane protein 171
TRCN0000487904	GPR137B	G protein-coupled receptor 137B
TRCN0000491879	FPR2	formyl peptide receptor 2
TRCN0000479337	SPPL2C	signal peptide peptidase like 2C
TRCN0000476089	SLC26A9	solute carrier family 26 (anion exchanger), member 9
TRCN0000470617	SLC7A8	solute carrier family 7 (amino acid transporter light chain, L system), member 8
TRCN0000479768	TFEB	transcription factor EB

## Sheet: Candidate hits set 2
Candidate ORF construct hits with log-fold change (LFC)>0.5 and q-value <0.1 in at least two of the six cell line plus drug combinations in primary overexpression screen
Construct ID	Gene Symbol	Description
TRCN0000469495	XLOC_001973	NA
TRCN0000481146	CST5	cystatin D
TRCN0000468155	SORD	sorbitol dehydrogenase
TRCN0000469185	RNF183	ring finger protein 183
TRCN0000465790	ZNF695	zinc finger protein 695
TRCN0000481577	RNF34	ring finger protein 34, E3 ubiquitin protein ligase
TRCN0000468811	ZADH2	zinc binding alcohol dehydrogenase domain containing 2
TRCN0000476396	PF4	platelet factor 4
TRCN0000465970	RIMKLA	ribosomal modification protein rimK-like family member A
TRCN0000470140	MED21	mediator complex subunit 21
TRCN0000472393	NO_MATCH_20	NA
TRCN0000489321	ADORA2B	adenosine A2b receptor
TRCN0000476987	SERPINB13	serpin peptidase inhibitor, clade B (ovalbumin), member 13
TRCN0000472986	NDUFB11	NADH dehydrogenase (ubiquinone) 1 beta subcomplex, 11, 17.3kDa
TRCN0000491801	S100A9	S100 calcium binding protein A9
TRCN0000473360	SPATA8	spermatogenesis associated 8
TRCN0000479060	TCEAL8	transcription elongation factor A (SII)-like 8
TRCN0000481082	EFCAB11	EF-hand calcium binding domain 11
TRCN0000488177	AGTR1	angiotensin II receptor, type 1
TRCN0000488083	HRH2	histamine receptor H2
TRCN0000489769	CXCR5	chemokine (C-X-C motif) receptor 5
TRCN0000480136	SLC13A2	solute carrier family 13 (sodium-dependent dicarboxylate transporter), member 2
TRCN0000488956	GPR3	G protein-coupled receptor 3
TRCN0000488397	CYB5A	cytochrome b5 type A (microsomal)
TRCN0000488691	ADORA2A	adenosine A2a receptor
TRCN0000466272	CRCT1	cysteine-rich C-terminal 1
TRCN0000472482	HMBOX1	homeobox containing 1
TRCN0000489099	PAX8	paired box 8
TRCN0000465533	ZNF101	zinc finger protein 101
TRCN0000471388	BCL2L14	BCL2-like 14 (apoptosis facilitator)
TRCN0000476447	SRSF3	serine/arginine-rich splicing factor 3
TRCN0000466650	RAB32	RAB32, member RAS oncogene family
TRCN0000489151	MCHR2	melanin-concentrating hormone receptor 2
TRCN0000488647	P2RY11	purinergic receptor P2Y, G-protein coupled, 11
TRCN0000467184	ADORA2A	adenosine A2a receptor
TRCN0000466454	TMEM140	transmembrane protein 140
TRCN0000468673	PHTF2	putative homeodomain transcription factor 2
TRCN0000488338	ADRB2	adrenoceptor beta 2, surface
TRCN0000469916	PPM1G	protein phosphatase, Mg2+/Mn2+ dependent, 1G
TRCN0000479333	NFE2L3	nuclear factor, erythroid 2-like 3
TRCN0000472748	NUSAP1	nucleolar and spindle associated protein 1
TRCN0000476415	PTPRR	protein tyrosine phosphatase, receptor type, R
TRCN0000476138	SULT6B1	sulfotransferase family, cytosolic, 6B, member 1
TRCN0000476251	FKBP9	FK506 binding protein 9, 63 kDa
TRCN0000475957	PGM5	phosphoglucomutase 5
TRCN0000467418	ZSCAN2	zinc finger and SCAN domain containing 2
TRCN0000469685	STX8	syntaxin 8
TRCN0000466398	NR2C2AP	nuclear receptor 2C2-associated protein

## Sheet: All candidate hits
Combined set of candidate hits with either 1) LFC>0.5 and q-value<0.001 in any cell line plus drug arm or 2) LFC>0.5 and q-value<0.1 in at least two of the six cell line plus drug arms; limited to 1 or 2 ORFs per gene
Construct ID	Gene Symbol	Description
TRCN0000489920	BCL2L1	BCL2-like 1
TRCN0000466971	BCL2L2	BCL2-like 2
TRCN0000491973	AGTR1	angiotensin II receptor, type 1
TRCN0000467220	PPAPDC1B	phosphatidic acid phosphatase type 2 domain containing 1B
TRCN0000489662	BCL2	B-cell CLL/lymphoma 2
TRCN0000470411	MAS1	MAS1 proto-oncogene, G protein-coupled receptor
TRCN0000467237	LYSMD2	LysM, putative peptidoglycan-binding, domain containing 2
TRCN0000481385	C20orf85	chromosome 20 open reading frame 85
TRCN0000469495	XLOC_001973	NA
TRCN0000468770	OOSP2	oocyte secreted protein 2
TRCN0000481111	PTGFR	prostaglandin F receptor (FP)
TRCN0000473478	SOX15	SRY (sex determining region Y)-box 15
TRCN0000478056	IRX6	iroquois homeobox 6
TRCN0000475598	CDX4	caudal type homeobox 4
TRCN0000475067	PRSS50	protease, serine, 50
TRCN0000468087	C15orf41	chromosome 15 open reading frame 41
TRCN0000478038	CD276	CD276 molecule
TRCN0000472820	ARL6IP6	ADP-ribosylation-like factor 6 interacting protein 6
TRCN0000474440	ERLIN2	ER lipid raft associated 2
TRCN0000466205	PLSCR4	phospholipid scramblase 4
TRCN0000474432	EGFL7	EGF-like-domain, multiple 7
TRCN0000471409	ISG20	interferon stimulated exonuclease gene 20kDa
TRCN0000481146	CST5	cystatin D
TRCN0000468155	SORD	sorbitol dehydrogenase
TRCN0000469185	RNF183	ring finger protein 183
TRCN0000465790	ZNF695	zinc finger protein 695
TRCN0000481577	RNF34	ring finger protein 34, E3 ubiquitin protein ligase
TRCN0000465727	CRYGB	crystallin, gamma B
TRCN0000474411	EGR2	early growth response 2
TRCN0000476507	MRPL52	mitochondrial ribosomal protein L52
TRCN0000472265	CRB3	crumbs homolog 3 (Drosophila)
TRCN0000477457	YAP1	Yes-associated protein 1
TRCN0000481113	PRKRA	protein kinase, interferon-inducible double stranded RNA dependent activator
TRCN0000489830	PRKRA	protein kinase, interferon-inducible double stranded RNA dependent activator
TRCN0000481563	GPR52	G protein-coupled receptor 52
TRCN0000475655	HOXD10	homeobox D10
TRCN0000491554	CHRM1	cholinergic receptor, muscarinic 1
TRCN0000479485	LIF	leukemia inhibitory factor
TRCN0000468811	ZADH2	zinc binding alcohol dehydrogenase domain containing 2
TRCN0000476606	CLEC4A	C-type lectin domain family 4, member A
TRCN0000470441	HAND2	heart and neural crest derivatives expressed 2
TRCN0000477808	NO_MATCH_5	NA
TRCN0000471076	RNF182	ring finger protein 182
TRCN0000467026	KRTAP10-3	keratin associated protein 10-3
TRCN0000473699	HIST1H4H	histone cluster 1 H4 family member h
TRCN0000476396	PF4	platelet factor 4
TRCN0000465970	RIMKLA	ribosomal modification protein rimK-like family member A
TRCN0000470140	MED21	mediator complex subunit 21
TRCN0000472393	NO_MATCH_20	NA
TRCN0000489321	ADORA2B	adenosine A2b receptor
TRCN0000481461	C14orf177	chromosome 14 open reading frame 177
TRCN0000476987	SERPINB13	serpin peptidase inhibitor, clade B (ovalbumin), member 13
TRCN0000472986	NDUFB11	NADH dehydrogenase (ubiquinone) 1 beta subcomplex, 11, 17.3kDa
TRCN0000491801	S100A9	S100 calcium binding protein A9
TRCN0000473360	SPATA8	spermatogenesis associated 8
TRCN0000479060	TCEAL8	transcription elongation factor A (SII)-like 8
TRCN0000469090	CEBPE	CCAAT/enhancer binding protein (C/EBP), epsilon
TRCN0000480858	MAGEA10	melanoma antigen family A, 10
TRCN0000489273	NR2E1	nuclear receptor subfamily 2, group E, member 1
TRCN0000488887	SLC10A1	solute carrier family 10 (sodium/bile acid cotransporter), member 1
TRCN0000480720	PKNOX1	PBX/knotted 1 homeobox 1
TRCN0000487755	TMEM11	transmembrane protein 11
TRCN0000477267	GLRA1	glycine receptor, alpha 1
TRCN0000468709	TOB1	transducer of ERBB2, 1
TRCN0000477892	FAM78B	family with sequence similarity 78, member B
TRCN0000474925	LCOR	ligand dependent nuclear receptor corepressor
TRCN0000489359	HRH1	histamine receptor H1
TRCN0000469547	DAOA	D-amino acid oxidase activator
TRCN0000479993	PRSS21	protease, serine, 21 (testisin)
TRCN0000466558	SNRNP40	small nuclear ribonucleoprotein 40kDa (U5)
TRCN0000466615	MGST1	microsomal glutathione S-transferase 1
TRCN0000489955	CD59	CD59 molecule, complement regulatory protein
TRCN0000481082	EFCAB11	EF-hand calcium binding domain 11
TRCN0000488177	AGTR1	angiotensin II receptor, type 1
TRCN0000469752	SUN3	Sad1 and UNC84 domain containing 3
TRCN0000469471	KIAA1598	KIAA1598
TRCN0000488083	HRH2	histamine receptor H2
TRCN0000468113	C1orf50	chromosome 1 open reading frame 50
TRCN0000470423	CCDC109B	coiled-coil domain containing 109B
TRCN0000489769	CXCR5	chemokine (C-X-C motif) receptor 5
TRCN0000480136	SLC13A2	solute carrier family 13 (sodium-dependent dicarboxylate transporter), member 2
TRCN0000491641	OR2T33	olfactory receptor, family 2, subfamily T, member 33
TRCN0000488956	GPR3	G protein-coupled receptor 3
TRCN0000488397	CYB5A	cytochrome b5 type A (microsomal)
TRCN0000471039	MCCC2	methylcrotonoyl-CoA carboxylase 2 (beta)
TRCN0000488691	ADORA2A	adenosine A2a receptor
TRCN0000466272	CRCT1	cysteine-rich C-terminal 1
TRCN0000478738	IGF2	insulin-like growth factor 2 (somatomedin A)
TRCN0000478724	CLEC12A	C-type lectin domain family 12, member A
TRCN0000472482	HMBOX1	homeobox containing 1
TRCN0000489099	PAX8	paired box 8
TRCN0000465533	ZNF101	zinc finger protein 101
TRCN0000471388	BCL2L14	BCL2-like 14 (apoptosis facilitator)
TRCN0000476447	SRSF3	serine/arginine-rich splicing factor 3
TRCN0000488087	PNLIP	pancreatic lipase
TRCN0000478294	RAB31	RAB31, member RAS oncogene family
TRCN0000466650	RAB32	RAB32, member RAS oncogene family
TRCN0000489110	CRHR1	corticotropin releasing hormone receptor 1
TRCN0000488873	ABCB1	ATP-binding cassette, sub-family B (MDR/TAP), member 1						*EXCLUDED
TRCN0000489626	CRHR1	corticotropin releasing hormone receptor 1
TRCN0000478807	HOXB5	homeobox B5
TRCN0000491707	CDX2	caudal type homeobox 2
TRCN0000489785	GPR139	G protein-coupled receptor 139
TRCN0000481607	TFAP2A	transcription factor AP-2 alpha (activating enhancer binding protein 2 alpha)
TRCN0000488012	MRGPRX4	MAS-related GPR, member X4
TRCN0000488234	MAS1	MAS1 proto-oncogene, G protein-coupled receptor
TRCN0000488175	GHSR	growth hormone secretagogue receptor
TRCN0000489925	PTGFR	prostaglandin F receptor (FP)
TRCN0000489784	GHSR	growth hormone secretagogue receptor
TRCN0000489536	P2RY6	pyrimidinergic receptor P2Y, G-protein coupled, 6
TRCN0000475973	GPR139	G protein-coupled receptor 139
TRCN0000470280	POU2F2	POU class 2 homeobox 2
TRCN0000479421	GPR68	G protein-coupled receptor 68
TRCN0000487723	GPR68	G protein-coupled receptor 68
TRCN0000489001	P2RY6	pyrimidinergic receptor P2Y, G-protein coupled, 6
TRCN0000489844	CHRM3	cholinergic receptor, muscarinic 3
TRCN0000488895	GPR148	G protein-coupled receptor 148
TRCN0000467871	MBNL1	muscleblind-like splicing regulator 1
TRCN0000465252	TMED5	transmembrane emp24 protein transport domain containing 5
TRCN0000487803	MRGPRX4	MAS-related GPR, member X4
TRCN0000489280	P2RY4	pyrimidinergic receptor P2Y, G-protein coupled, 4
TRCN0000475880	CELF3	CUGBP, Elav-like family member 3
TRCN0000475112	CNOT7	CCR4-NOT transcription complex, subunit 7
TRCN0000475659	ZNF645	zinc finger protein 645
TRCN0000492142	GPR137B	G protein-coupled receptor 137B
TRCN0000478756	KATNAL1	katanin p60 subunit A-like 1
TRCN0000478908	MBNL2	muscleblind-like splicing regulator 2
TRCN0000474785	NKX2-5	NK2 homeobox 5
TRCN0000473508	SOX2	SRY (sex determining region Y)-box 2
TRCN0000487862	NPY6R	neuropeptide Y receptor Y6 (pseudogene)
TRCN0000477257	GNS	glucosamine (N-acetyl)-6-sulfatase
TRCN0000489151	MCHR2	melanin-concentrating hormone receptor 2
TRCN0000468434	ITM2A	integral membrane protein 2A
TRCN0000488647	P2RY11	purinergic receptor P2Y, G-protein coupled, 11
TRCN0000467184	ADORA2A	adenosine A2a receptor
TRCN0000488169	KRAS	Kirsten rat sarcoma viral oncogene homolog
TRCN0000470161	GAS2	growth arrest-specific 2
TRCN0000475932	C20orf166-AS1	NA
TRCN0000478133	RSPH1	radial spoke head 1 homolog (Chlamydomonas)
TRCN0000473688	C1D	C1D nuclear receptor corepressor
TRCN0000480202	SLC8B1	solute carrier family 8 (sodium/lithium/calcium exchanger), member B1
TRCN0000466454	TMEM140	transmembrane protein 140
TRCN0000466741	SPSB2	splA/ryanodine receptor domain and SOCS box containing 2
TRCN0000471385	LIPT1	lipoyltransferase 1
TRCN0000480394	RDM1	RAD52 motif 1
TRCN0000468673	PHTF2	putative homeodomain transcription factor 2
TRCN0000467786	FTSJ1	FtsJ RNA methyltransferase homolog 1 (E. coli)
TRCN0000488338	ADRB2	adrenoceptor beta 2, surface
TRCN0000469916	PPM1G	protein phosphatase, Mg2+/Mn2+ dependent, 1G
TRCN0000479333	NFE2L3	nuclear factor, erythroid 2-like 3
TRCN0000472748	NUSAP1	nucleolar and spindle associated protein 1
TRCN0000476415	PTPRR	protein tyrosine phosphatase, receptor type, R
TRCN0000476138	SULT6B1	sulfotransferase family, cytosolic, 6B, member 1
TRCN0000476251	FKBP9	FK506 binding protein 9, 63 kDa
TRCN0000475957	PGM5	phosphoglucomutase 5
TRCN0000489905	OXER1	oxoeicosanoid (OXE) receptor 1
TRCN0000479961	SCP2D1	SCP2 sterol-binding domain containing 1
TRCN0000467418	ZSCAN2	zinc finger and SCAN domain containing 2
TRCN0000469685	STX8	syntaxin 8
TRCN0000472951	SLC35G2	solute carrier family 35, member G2
TRCN0000466398	NR2C2AP	nuclear receptor 2C2-associated protein
TRCN0000477560	TPRN	taperin
TRCN0000468748	RAB30	RAB30, member RAS oncogene family
TRCN0000477247	C17orf51	chromosome 17 open reading frame 51
TRCN0000478775	WBP1	WW domain binding protein 1
TRCN0000477752	TMEM92	transmembrane protein 92
TRCN0000477155	FMO4	flavin containing monooxygenase 4
TRCN0000479505	LHX9	LIM homeobox 9
TRCN0000489942	HHEX	hematopoietically expressed homeobox
TRCN0000476089	SLC26A9	solute carrier family 26 (anion exchanger), member 9
TRCN0000489029	GPSM3	G-protein signaling modulator 3
TRCN0000488298	XCR1	chemokine (C motif) receptor 1
TRCN0000473127	GLRA3	glycine receptor, alpha 3
TRCN0000474542	VENTX	VENT homeobox
TRCN0000473361	AGPAT6	1-acylglycerol-3-phosphate O-acyltransferase 6
TRCN0000492299	SLC7A8	solute carrier family 7 (amino acid transporter light chain, L system), member 8
TRCN0000471175	ELAVL2	ELAV like neuron-specific RNA binding protein 2
TRCN0000472033	TLE1	transducin-like enhancer of split 1 (E(sp1) homolog, Drosophila)
TRCN0000469116	EIF2B1	eukaryotic translation initiation factor 2B, subunit 1 alpha, 26kDa
TRCN0000476461	NPEPPS	aminopeptidase puromycin sensitive
TRCN0000471194	PRDM14	PR domain containing 14
TRCN0000479594	TMEM171	transmembrane protein 171
TRCN0000467329	AMIGO1	adhesion molecule with Ig-like domain 1
TRCN0000469674	MITF	microphthalmia-associated transcription factor
TRCN0000488582	MTNR1A	melatonin receptor 1A
TRCN0000466832	SELENBP1	selenium binding protein 1
TRCN0000476429	TMEM129	transmembrane protein 129
TRCN0000478698	AUNIP	aurora kinase A and ninein interacting protein
TRCN0000474949	NAA30	N(alpha)-acetyltransferase 30, NatC catalytic subunit
TRCN0000470617	SLC7A8	solute carrier family 7 (amino acid transporter light chain, L system), member 8
TRCN0000489751	CHRM3	cholinergic receptor, muscarinic 3
TRCN0000479768	TFEB	transcription factor EB
TRCN0000478359	NSG1	neuronal vesicle trafficking associated 1
TRCN0000492071	FPR2	formyl peptide receptor 2
TRCN0000479337	SPPL2C	signal peptide peptidase like 2C
TRCN0000488600	MAD2L1	mitotic arrest deficient 2 like 1
TRCN0000478063	SPAST	spastin
TRCN0000470460	GPR18	G protein-coupled receptor 18
TRCN0000470093	OR1D4	olfactory receptor, family 1, subfamily D, member 4 (gene/pseudogene)
TRCN0000472802	MAB21L2	mab-21-like 2 (C. elegans)
TRCN0000487679	MRGPRD	MAS-related GPR, member D
TRCN0000467387	RNF125	ring finger protein 125, E3 ubiquitin protein ligase
TRCN0000467165	C20orf141	chromosome 20 open reading frame 141
TRCN0000469686	ATP6V1E2	ATPase, H+ transporting, lysosomal 31kDa, V1 subunit E2
TRCN0000488150	GPR148	G protein-coupled receptor 148
TRCN0000469750	FCRLA	Fc receptor-like A
TRCN0000466646	ZNF513	zinc finger protein 513
TRCN0000488276	GPR141	G protein-coupled receptor 141
TRCN0000475749	LMX1B	LIM homeobox transcription factor 1, beta
TRCN0000489456	IDO1	indoleamine 2,3-dioxygenase 1
TRCN0000489508	CHRM5	cholinergic receptor, muscarinic 5
TRCN0000488143	MRGPRD	MAS-related GPR, member D
TRCN0000477890	RHOXF2	Rhox homeobox family, member 2
TRCN0000477788	SLC9A1	solute carrier family 9, subfamily A (NHE1, cation proton antiporter 1), member 1
TRCN0000475374	JAGN1	jagunal homolog 1 (Drosophila)
TRCN0000471310	TPRKB	TP53RK binding protein
TRCN0000473760	USP36	ubiquitin specific peptidase 36
TRCN0000489839	SLC22A4	solute carrier family 22 (organic cation/zwitterion transporter), member 4
TRCN0000487904	GPR137B	G protein-coupled receptor 137B
TRCN0000488878	BRS3	bombesin-like receptor 3
TRCN0000473177	SPEM1	spermatid maturation 1
TRCN0000489097	GABRR1	gamma-aminobutyric acid (GABA) A receptor, rho 1
TRCN0000481285	ZNF645	zinc finger protein 645
TRCN0000478887	PIK3IP1	phosphoinositide-3-kinase interacting protein 1
TRCN0000491879	FPR2	formyl peptide receptor 2
TRCN0000469325	C17orf62	chromosome 17 open reading frame 62
TRCN0000479953	MEOX2	mesenchyme homeobox 2
TRCN0000487975	TFE3	transcription factor binding to IGHM enhancer 3
TRCN0000466913	RBFOX1	RNA binding protein, fox-1 homolog (C. elegans) 1
TRCN0000468052	GPR4	G protein-coupled receptor 4
TRCN0000467081	RAB3A	RAB3A, member RAS oncogene family
TRCN0000466654	GPSM3	G-protein signaling modulator 3
TRCN0000469164	GNRHR	gonadotropin-releasing hormone receptor

## Sheet: Neutral
Proposed neutral ORFs with Z-score of median log-fold change (using basic method, log2(1+reads per million)) between -0.1 and 0.1 in all 3 drugs for both cell lines in primary overexpression screen
Construct ID	Gene Symbol	Description
TRCN0000488880	FCGR3A	Fc fragment of IgG, low affinity IIIa, receptor (CD16a)
TRCN0000469917	XLOC_005712	NA
TRCN0000469157	TMEM239	transmembrane protein 239
TRCN0000476921	SBSPON	somatomedin B and thrombospondin type 1 domain containing
TRCN0000479301	KIAA1467	KIAA1467
TRCN0000480602	PVRL3	NA
TRCN0000488966	ADK	adenosine kinase
TRCN0000470455	CLDND2	claudin domain containing 2
TRCN0000476278	STS	steroid sulfatase (microsomal), isozyme S
TRCN0000478850	C17orf67	chromosome 17 open reading frame 67
TRCN0000470909	H2AFV	H2A histone family, member V
TRCN0000479268	WDR93	WD repeat domain 93
TRCN0000474061	IFT22	intraflagellar transport 22
TRCN0000477356	XLOC_l2_004840	NA
TRCN0000478470	RPS28	ribosomal protein S28
TRCN0000491543	IL23A	interleukin 23, alpha subunit p19
TRCN0000475376	CCDC115	coiled-coil domain containing 115
TRCN0000467961	LRAT	lecithin retinol acyltransferase (phosphatidylcholine--retinol O-acyltransferase)
TRCN0000465951	PCGF1	polycomb group ring finger 1
TRCN0000475203	CEP57L1	centrosomal protein 57kDa-like 1
TRCN0000470802	FAM58A	family with sequence similarity 58, member A
TRCN0000472451	ANAPC13	anaphase promoting complex subunit 13
TRCN0000465705	LHFPL5	lipoma HMGIC fusion partner-like 5
TRCN0000477761	KRT40	keratin 40
TRCN0000489706	OR14C36	olfactory receptor, family 14, subfamily C, member 36
TRCN0000480269	ZRSR2	zinc finger (CCCH type), RNA-binding motif and serine/arginine rich 2
TRCN0000467571	PTH	parathyroid hormone
TRCN0000470428	LRFN4	leucine rich repeat and fibronectin type III domain containing 4
TRCN0000476206	C1orf189	chromosome 1 open reading frame 189
TRCN0000481388	VAMP4	vesicle-associated membrane protein 4
TRCN0000472199	C16orf74	chromosome 16 open reading frame 74
TRCN0000477721	LINGO2	leucine rich repeat and Ig domain containing 2
TRCN0000465999	HIST1H3H	histone cluster 1, H3h
TRCN0000475419	KIF26B	kinesin family member 26B
TRCN0000466160	NPPB	natriuretic peptide B
TRCN0000465509	BVES	blood vessel epicardial substance
TRCN0000480825	CD226	CD226 molecule
TRCN0000471306	MRPL13	mitochondrial ribosomal protein L13
TRCN0000488871	OPN1SW	opsin 1 (cone pigments), short-wave-sensitive
TRCN0000489156	NME5	non-metastatic cells 5, protein expressed in (nucleoside-diphosphate kinase)
TRCN0000480815	LCN15	lipocalin 15
TRCN0000465293	C2orf88	chromosome 2 open reading frame 88
TRCN0000480614	TMEM91	transmembrane protein 91
TRCN0000489947	GHRHR	growth hormone releasing hormone receptor
TRCN0000488718	IDNK	IDNK, gluconokinase
TRCN0000467284	RGS4	regulator of G-protein signaling 4
TRCN0000477316	PRSS57	protease, serine, 57
TRCN0000469628	DIO1	deiodinase, iodothyronine, type I
TRCN0000467907	HCST	hematopoietic cell signal transducer
TRCN0000468074	HLA-DQA1	major histocompatibility complex, class II, DQ alpha 1
TRCN0000468661	NO_MATCH_117	NA
TRCN0000477494	AP5S1	adaptor related protein complex 5 subunit sigma 1
TRCN0000474438	RABIF	RAB interacting factor
TRCN0000465893	ENTPD2	ectonucleoside triphosphate diphosphohydrolase 2
TRCN0000474365	NIPA1	non imprinted in Prader-Willi/Angelman syndrome 1
TRCN0000473758	NSUN7	NOP2/Sun domain family, member 7
TRCN0000467590	GAST	gastrin
TRCN0000469132	KIAA0087	KIAA0087
TRCN0000470436	H1FNT	H1 histone family, member N, testis-specific
TRCN0000474611	ZBTB37	zinc finger and BTB domain containing 37
TRCN0000470406	SCGB2A2	secretoglobin, family 2A, member 2
TRCN0000470709	TMEFF1	transmembrane protein with EGF-like and two follistatin-like domains 1
TRCN0000479054	HIST1H3B	histone cluster 1, H3b
TRCN0000473441	KRR1	KRR1, small subunit (SSU) processome component, homolog (yeast)
TRCN0000474834	SDHC	succinate dehydrogenase complex, subunit C, integral membrane protein, 15kDa
TRCN0000474179	DUT	deoxyuridine triphosphatase
TRCN0000466565	NR2C1	nuclear receptor subfamily 2, group C, member 1
TRCN0000477740	TMEM136	transmembrane protein 136
TRCN0000474562	ANKS1B	ankyrin repeat and sterile alpha motif domain containing 1B
TRCN0000488005	LOC650293	NA
TRCN0000478069	XLOC_l2_015208	NA
TRCN0000488675	FSHR	follicle stimulating hormone receptor
TRCN0000470558	GABPB1	GA binding protein transcription factor, beta subunit 1
TRCN0000473666	FLYWCH2	FLYWCH family member 2
TRCN0000491657	ADAM18	ADAM metallopeptidase domain 18
TRCN0000478472	SNRNP25	small nuclear ribonucleoprotein 25kDa (U11/U12)
TRCN0000488403	NMUR1	neuromedin U receptor 1

## Sheet: Candidate sensitizers
Candidate "sensitizers" with strongest negative log-fold change (using basic method, log2(1+reads per million)) with drug treatment (10 lowest log-fold change in each arm, removing duplicates)
Construct ID	Gene Symbol	Description
TRCN0000489612	ABL1	c-abl oncogene 1, non-receptor tyrosine kinase
TRCN0000491940	ABL1	c-abl oncogene 1, non-receptor tyrosine kinase
TRCN0000488923	AKT1	v-akt murine thymoma viral oncogene homolog 1
TRCN0000489962	AKT1	v-akt murine thymoma viral oncogene homolog 1
TRCN0000489868	AKT2	v-akt murine thymoma viral oncogene homolog 2
TRCN0000479429	CCDC103	coiled-coil domain containing 103
TRCN0000491649	CDK18	cyclin-dependent kinase 18
TRCN0000470327	DES	desmin
TRCN0000470266	DGKK	diacylglycerol kinase, kappa
TRCN0000488901	EIF2AK2	eukaryotic translation initiation factor 2-alpha kinase 2
TRCN0000478431	EIF3C	eukaryotic translation initiation factor 3, subunit C
TRCN0000478423	EXOC3L4	exocyst complex component 3-like 4
TRCN0000480766	EZH1	enhancer of zeste homolog 1 (Drosophila)
TRCN0000479538	FAM126A	family with sequence similarity 126, member A
TRCN0000465298	FOXR2	forkhead box R2
TRCN0000466621	FUK	fucokinase
TRCN0000479184	GSE1	NA
TRCN0000479774	HEXIM1	hexamethylene bis-acetamide inducible 1
TRCN0000468422	IFNB1	interferon, beta 1, fibroblast
TRCN0000491939	KIT	v-kit Hardy-Zuckerman 4 feline sarcoma viral oncogene homolog
TRCN0000492138	LDLR	low density lipoprotein receptor
TRCN0000468228	LOC102724428	NA
TRCN0000473188	MAGEB6	melanoma antigen family B, 6
TRCN0000480006	MDM1	Mdm1 nuclear protein homolog (mouse)
TRCN0000465481	NO_MATCH_133	NA
TRCN0000489648	PIK3CA	phosphoinositide-3-kinase, catalytic, alpha polypeptide
TRCN0000487730	PIK3CA	phosphoinositide-3-kinase, catalytic, alpha polypeptide
TRCN0000489129	PKN1	protein kinase N1
TRCN0000489896	PLK4	polo-like kinase 4
TRCN0000473947	PNPLA6	patatin-like phospholipase domain containing 6
TRCN0000472901	PPP3CA	protein phosphatase 3, catalytic subunit, alpha isozyme
TRCN0000477017	RGL1	ral guanine nucleotide dissociation stimulator-like 1
TRCN0000477551	RHBDF1	rhomboid 5 homolog 1 (Drosophila)
TRCN0000470429	SCNM1	sodium channel modifier 1
TRCN0000489060	SIK3	SIK family kinase 3
TRCN0000467335	SLC38A2	solute carrier family 38, member 2
TRCN0000465615	SPATA2	spermatogenesis associated 2
TRCN0000470452	TMCC1	transmembrane and coiled-coil domain family 1
TRCN0000469246	TPH2	tryptophan hydroxylase 2
TRCN0000476551	TSC2	tuberous sclerosis 2
TRCN0000472098	VMA21	VMA21 vacuolar H+-ATPase homolog (S. cerevisiae)
TRCN0000465965	YTHDC1	YTH domain containing 1

## Sheet: Lethal
Selected genes whose overexpression is lethal in the absence of drug
Construct ID	Gene Symbol	Description
TRCN0000476198	ZNF124	zinc finger protein 124
TRCN0000488984	GRM2	glutamate receptor, metabotropic 2
TRCN0000489832	BAI1	brain-specific angiogenesis inhibitor 1
TRCN0000470107	KLF12	Kruppel-like factor 12
TRCN0000478961	RBL1	retinoblastoma-like 1 (p107)
TRCN0000472405	LOC254896	NA
TRCN0000487845	MC1R	melanocortin 1 receptor
TRCN0000468835	DPH5	DPH5 homolog (S. cerevisiae)
TRCN0000488594	NEDD9	neural precursor cell expressed, developmentally down-regulated 9

## Sheet: Other
Additional ORF clones added to minipool due to biological interest
Construct ID	Gene Symbol	Description
TRCN0000467736	MCL1	myeloid cell leukemia sequence 1 (BCL2-related)
TRCN0000472603	BCL2L1	BCL2-like 1
BRDN0000990058*	BCL2	B-cell CLL/lymphoma 2
TRCN0000479102	PLAC1	placenta-specific 1
*This clone has a large deletion in BCL2 and was removed from subsequent analysis

## Sheet: Vector controls
ORF clones as vector controls
Construct ID	Gene Symbol
BRDN0000559468	Luciferase
BRDN0000559463	HcRed
BRDN0000559460	BFP
BRDN0000559466	GFP
