# Supplementary material for: Pooled Genomic Screens Identify Anti-apoptotic Genes as Targetable Mediators of Chemotherapy Resistance in Ovarian Cancer
Source: Oxford University Press journal article supplement (doi:10.1158/1541-7786.mcr-18-1243), 2019-08-28
Supplement: 15417786mcr181243-sup-212398_3_supp_5704741_pw3r8y.xlsx [file 15417786mcr181243-sup-212398_3_supp_5704741_pw3r8y.xlsx]

## Sheet: OVSAHO
Construct Barcode	Construct IDs	OVSAHO;ETP-AVE	LFC-OVSAHO;Rep A-DMSO	LFC-OVSAHO;Rep B-DMSO	LFC-OVSAHO;Rep A-Cisplatin	LFC-OVSAHO;Rep B-Cisplatin	LFC-OVSAHO;Rep A-Paclitaxel	LFC-OVSAHO;Rep B-Paclitaxel	LFC-OVSAHO;Rep A-Cis/Pac	LFC-OVSAHO;Rep B-Cis/Pac	Gene Symbol	LFC-AVE OVSAHO DMSO	LFC-AVE OVSAHO Cisplatin	LFC-AVE OVSAHO Paclitaxel	LFC-AVE OVSAHO Cis-Pac	Z-score AVE LFC OVSAHO DMSO	Z-score AVE LFC OVSAHO Cisplatin	Z-score AVE LFC OVSAHO Paclitaxel	Z-score AVE LFC OVSAHO Cis/Pac
TATGCTACCACAGAGAAAGCAATC	TRCN0000489920	11.74	0.18	0.16	0.93	1.01	1.36	0.85	1.42	1.48	BCL2L1	0.17	0.97	1.11	1.45	0.470301	1.26357	1.61213	1.7167
CACTTATCCGGTGATTTCCGTTCC	TRCN0000489662	11.21	0.41	0.27	1	1.32	1.22	6.88	1.37	1.4	BCL2	0.34	1.16	4.05	1.39	0.640301	1.45357	4.55213	1.6567
GAGGAAGGTATGTCTCAAGAGCCT	TRCN0000481607	11.43	-0.27	-0.25	0.47	0.51	1.81	0.91	1.13	1.12	TFAP2A	-0.26	0.49	1.36	1.12	0.0403014	0.783571	1.86213	1.3867
CGCGCAGAGAGTGGTAGCATGAGA	TRCN0000472603	11.7	-0.02	-0.04	0.5	0.95	0.7	1.26	0.88	0.8	BCL2L1	-0.03	0.72	0.98	0.84	0.270301	1.01357	1.48213	1.1067
TTAAGTTAGCCAGTTCCTGTGTAT	TRCN0000466971	11.58	0.16	0.11	0.69	1.3	0.69	0.29	0.79	0.86	BCL2L2	0.13	1	0.49	0.83	0.430301	1.29357	0.992131	1.0967
TCCCAGCGGTGCCATATTCAAGAA	TRCN0000478807	12.03	0.15	0.34	0.53	0.52	0.6	0.21	0.68	0.67	HOXB5	0.25	0.52	0.41	0.67	0.550301	0.813571	0.912131	0.936697
AACTTAACGGTGGATGGACTATTT	TRCN0000488582	10.3	1.04	0.94	0.87	0.78	0.34	0.22	0.59	0.69	MTNR1A	0.99	0.82	0.28	0.64	1.2903	1.11357	0.782131	0.906697
TTTAATTGGTCCCGACCCTGACGG	TRCN0000470423	11.04	0.63	0.72	0.51	0.44	0.53	0.11	0.63	0.59	MCUB	0.67	0.47	0.32	0.61	0.970301	0.763571	0.822131	0.876697
ATAGCTATCTCCCGGGACGTGTCA	TRCN0000471310	11.19	0.73	0.86	0.58	0.64	0.48	0.06	0.68	0.55	TPRKB	0.79	0.61	0.27	0.61	1.0903	0.903571	0.772131	0.876697
GAGTTCTCCAAGCTCTACCCGGCA	TRCN0000488298	11.41	0.48	0.49	0.95	0.96	0.32	0	0.62	0.61	XCR1	0.48	0.96	0.16	0.61	0.780301	1.25357	0.662131	0.876697
GGGTGGCCTTCCAATCGAATCCGG	TRCN0000491657	11.59	0.72	0.65	0.69	0.76	0.62	0.21	0.54	0.59	ADAM18	0.68	0.73	0.41	0.57	0.980301	1.02357	0.912131	0.836697
GCATCTACGAGAAACTCACGATTC	TRCN0000468770	11.32	-1.37	-1.46	-0.74	-0.63	1	0.73	0.59	0.55	OOSP2	-1.41	-0.69	0.87	0.57	-1.1097	-0.396429	1.37213	0.836697
TTTAGACTTTACCCGAATAGCCTG	TRCN0000487862	9.66	1.16	0.82	0.68	0.73	0.58	-0.04	0.59	0.54	NPY6R	0.99	0.71	0.27	0.56	1.2903	1.00357	0.772131	0.826697
ATTTCTGGGCCGTCCCAATGTTAA	TRCN0000475067	11.05	0.77	0.76	0.54	0.51	0.35	0.03	0.48	0.61	PRSS50	0.77	0.53	0.19	0.55	1.0703	0.823571	0.692131	0.816697
AGCTGCCTATGTCGCTAGTTCGCG	TRCN0000480858	10.61	0.36	0.46	0.71	0.74	0.19	-0.11	0.46	0.65	MAGEA10	0.41	0.72	0.04	0.55	0.710301	1.01357	0.542131	0.816697
TAGAGTTTCTAATTTAAAATTTCG	TRCN0000473478	13.44	-0.45	-0.29	0.06	0.18	0.49	0.14	0.52	0.58	SOX15	-0.37	0.12	0.31	0.55	-0.0696986	0.413571	0.812131	0.816697
TACCGGACATGCTCACTGTGCGAA	TRCN0000479505	12.36	-0.3	-0.32	0.46	0.54	0.29	-0.24	0.56	0.53	LHX9	-0.31	0.5	0.02	0.55	-0.00969857	0.793571	0.522131	0.816697
CATCGTGCTCTTATCCACGACTTA	TRCN0000470093	12.03	0.76	0.73	0.94	0.92	0.45	0.09	0.5	0.5	OR1D4	0.75	0.93	0.27	0.5	1.0503	1.22357	0.772131	0.766697
TTTTCTCCCGAAAAATCGGCTAGC	TRCN0000465727	11.01	0.68	0.69	0.66	0.57	0.4	0.04	0.39	0.61	CRYGB	0.69	0.62	0.22	0.5	0.990301	0.913571	0.722131	0.766697
ATCTCCGTACTTGCCCGGGTCCCA	TRCN0000488895	10.23	1.14	0.84	0.79	0.61	0.45	-0.08	0.55	0.44	GPR148	0.99	0.7	0.18	0.49	1.2903	0.993571	0.682131	0.756697
AAATCAAACTTCCTGGTAGGATAA	TRCN0000471385	10.14	0.52	0.45	0.38	0.47	0.44	-0.23	0.46	0.51	LIPT1	0.48	0.42	0.1	0.49	0.780301	0.713571	0.602131	0.756697
AATTATCATCGCCGGACTTAGCGC	TRCN0000472393	10.47	0.7	0.78	0.49	0.56	0.26	-0.08	0.5	0.49	NO_MATCH_2	0.74	0.52	0.09	0.49	1.0403	0.813571	0.592131	0.756697
AACCTTCGCATCCTACTTACCTGC	TRCN0000481113	9.99	0.2	0.31	0.31	0.31	0.37	0	0.49	0.47	PRKRA	0.26	0.31	0.18	0.48	0.560301	0.603571	0.682131	0.746697
ATCTGATTTGAGGTGCGCTCTGGT	TRCN0000489151	9.83	0.31	0.58	0.43	0.34	0.38	0.08	0.47	0.48	MCHR2	0.45	0.38	0.23	0.47	0.750301	0.673571	0.732131	0.736697
AAACTTCCGAGGCGCTCTATTTCC	TRCN0000489099	10.87	-0.55	-0.7	-0.38	-0.36	0.54	0.12	0.41	0.48	PAX8	-0.63	-0.37	0.33	0.45	-0.329699	-0.0764295	0.832131	0.716697
GATTTGTTGGGGAGTATTTCCTAT	TRCN0000491641	10.08	0.44	0.64	0.69	0.48	0.41	-0.1	0.4	0.5	OR2T33	0.54	0.59	0.15	0.45	0.840301	0.883571	0.652131	0.716697
GACAGTGACTAATAAATACGGATT	TRCN0000489830	11.47	0.06	0.32	0.34	0.27	0.47	-0.15	0.47	0.43	PRKRA	0.19	0.3	0.16	0.45	0.490301	0.593571	0.662131	0.716697
CCTTGAAGTGCATAAATCAGGCCT	TRCN0000477356	12.23	0.63	0.7	0.56	0.54	0.36	-0.18	0.42	0.44	XLOC_l2_004840	0.67	0.55	0.09	0.43	0.970301	0.843571	0.592131	0.696697
ATTTGTCTTAAGCCCCAATTCGAT	TRCN0000478038	11.32	0.67	0.61	0.53	0.37	0.43	-0.07	0.37	0.5	CD276	0.64	0.45	0.18	0.43	0.940301	0.743571	0.682131	0.696697
TGTGAAGGTACTCGGCAACAGACC	TRCN0000467871	11.6	0.01	0.15	0.48	0.54	0.27	-0.26	0.53	0.33	MBNL1	0.08	0.51	0	0.43	0.380301	0.803571	0.502131	0.696697
CCCCCCGTTGCCTCCGAACCGCCC	TRCN0000476206	11.9	0.77	0.78	0.63	0.65	0.37	-0.03	0.37	0.47	C1orf189	0.77	0.64	0.17	0.42	1.0703	0.933571	0.672131	0.686697
AAATCCTAGGCTATCCATTGGTCA	TRCN0000476606	10.58	0.38	0.55	0.44	0.5	0.35	-0.03	0.36	0.48	CLEC4A	0.47	0.47	0.16	0.42	0.770301	0.763571	0.662131	0.686697
GTTTCCCTTAAGACACCTTTAAGG	TRCN0000469495	11.1	0.36	0.42	0.34	0.19	0.44	-0.06	0.41	0.41	XLOC_001973	0.39	0.27	0.19	0.41	0.690301	0.563571	0.692131	0.676697
ATGTAAATTTGCTACCACATTGCC	TRCN0000470460	11.11	0.66	0.6	0.47	0.37	0.48	-0.19	0.42	0.39	GPR18	0.63	0.42	0.14	0.41	0.930301	0.713571	0.642131	0.676697
AAGCCATTCTAAATTGATGACAAC	TRCN0000488150	10.94	0.84	0.75	0.64	0.46	0.26	-0.26	0.43	0.38	GPR148	0.8	0.55	0	0.41	1.1003	0.843571	0.502131	0.676697
AAATGTCCGGTGCGTTCCCTTGTG	TRCN0000473177	11.15	0.59	0.5	0.5	0.4	0.29	-0.22	0.37	0.44	SPEM1	0.55	0.45	0.04	0.4	0.850301	0.743571	0.542131	0.666697
ATTATTCTTTATCTTACTGATCAA	TRCN0000469185	14.05	0.62	0.6	0.55	0.41	0.38	-0.1	0.41	0.39	RNF183	0.61	0.48	0.14	0.4	0.910301	0.773571	0.642131	0.666697
GTTTATGGACCATTTTACGGGACA	TRCN0000466741	11.3	0.51	0.55	0.47	0.41	0.27	-0.04	0.37	0.43	SPSB2	0.53	0.44	0.11	0.4	0.830301	0.733571	0.612131	0.666697
GTTAACATTTTCCCTTTAATCATC	TRCN0000481111	12.09	0.4	0.41	0.03	0.02	0.36	-0.05	0.31	0.47	PTGFR	0.41	0.03	0.16	0.39	0.710301	0.323571	0.662131	0.656697
TTTTTATCTTACACCTCATACCGT	TRCN0000468087	11.53	0.56	0.4	0.45	0.32	0.3	-0.21	0.32	0.46	C15orf41	0.48	0.39	0.05	0.39	0.780301	0.683571	0.552131	0.656697
ATGGTATAAATTGTCACCCAACTA	TRCN0000489029	11.45	0.71	0.77	0.66	0.64	0.05	-0.25	0.34	0.45	GPSM3	0.74	0.65	-0.1	0.39	1.0403	0.943571	0.402131	0.656697
TCACCCCCGGCTCTAACTCCCCCA	TRCN0000466454	11.27	-0.27	-0.19	0.24	0.2	0.43	0.06	0.39	0.39	TMEM140	-0.23	0.22	0.24	0.39	0.0703014	0.513571	0.742131	0.656697
TTCGCAATTCTTGTCATTTGACGT	TRCN0000469674	8.18	-1.07	-1.78	-0.34	-0.39	0.87	-0.47	0.32	0.44	MITF	-1.43	-0.36	0.2	0.38	-1.1297	-0.0664295	0.702131	0.646697
GCAGGGGGAGTTCGGTCCGTCCTT	TRCN0000467907	11.56	0.57	0.74	0.5	0.6	0.55	-0.14	0.36	0.39	HCST	0.66	0.55	0.2	0.37	0.960301	0.843571	0.702131	0.636697
AACCTATTACAGCCGGGGGGAGCC	TRCN0000478908	9.83	0.22	0.04	0.35	0.13	0.21	-0.4	0.33	0.41	MBNL2	0.13	0.24	-0.1	0.37	0.430301	0.533571	0.402131	0.636697
ACCTTGCCGGTCCCAGTAATTCAA	TRCN0000479953	9.31	0.59	0.49	0.56	0.34	0.03	0.05	0.46	0.28	MEOX2	0.54	0.45	0.04	0.37	0.840301	0.743571	0.542131	0.636697
AAGAAGACCAACCGCAGCCACAGC	TRCN0000470161	11.43	0.49	0.48	0.37	0.42	0.28	-0.13	0.32	0.4	GAS2	0.48	0.4	0.07	0.36	0.780301	0.693571	0.572131	0.626697
AAGTTTTCTGGCCCAGCAACTTAC	TRCN0000469164	9.03	0.52	0.46	0.6	0.3	0.47	0.22	0.27	0.45	GNRHR	0.49	0.45	0.34	0.36	0.790301	0.743571	0.842131	0.626697
ATTTTGTGCCGACTTTTCAACGTC	TRCN0000467220	10.58	0.5	0.42	0.38	0.24	0.26	-0.25	0.37	0.35	PLPP5	0.46	0.31	0.01	0.36	0.760301	0.603571	0.512131	0.626697
TTTTGTCCAGGTGGATTAATGGTT	TRCN0000479993	10.96	0.59	0.44	0.44	0.4	0.36	-0.22	0.39	0.34	PRSS21	0.52	0.42	0.07	0.36	0.820301	0.713571	0.572131	0.626697
AAATGCTCCTACAAGTTCTTCCTC	TRCN0000480136	10.69	0.63	0.57	0.44	0.37	0.44	-0.03	0.24	0.46	SLC13A2	0.6	0.4	0.2	0.35	0.900301	0.693571	0.702131	0.616697
AATTCTTATTAATATCATCTCGCC	TRCN0000479485	10.66	0.57	0.62	0.41	0.26	0.04	-0.36	0.26	0.43	LIF	0.6	0.33	-0.16	0.35	0.900301	0.623571	0.342131	0.616697
CACCATGCATATCGTTTGGTCCTA	TRCN0000470802	11.79	0.58	0.71	0.47	0.46	0.17	-0.05	0.45	0.22	FAM58A	0.65	0.47	0.06	0.34	0.950301	0.763571	0.562131	0.606697
CGCTCCGTGGGGCTCTGGCCCCCA	TRCN0000480815	12.12	0.78	0.79	0.6	0.58	0.27	-0.12	0.31	0.37	LCN15	0.79	0.59	0.07	0.34	1.0903	0.883571	0.572131	0.606697
GCATGGGCCGAGCGCATTTCGCGG	TRCN0000478069	12.1	0.35	0.43	0.45	0.38	0.54	0.06	0.34	0.32	FAM27E4	0.39	0.42	0.3	0.33	0.690301	0.713571	0.802131	0.596697
CTCGCGGCTGGCTCAATGGGTCCT	TRCN0000480602	11.2	0.49	0.34	0.41	0.28	0.39	-0.23	0.36	0.3	NECTIN3	0.41	0.34	0.08	0.33	0.710301	0.633571	0.582131	0.596697
TAGACGGGCCTAACCTCCAGGAAC	TRCN0000474365	12.21	0.56	0.64	0.52	0.42	0.26	-0.06	0.35	0.31	NIPA1	0.6	0.47	0.1	0.33	0.900301	0.763571	0.602131	0.596697
CAGCTTGTCTGTGGCCGCCGGAAC	TRCN0000470455	11.34	0.56	0.61	0.49	0.5	0.25	-0.15	0.36	0.3	CLDND2	0.59	0.49	0.05	0.33	0.890301	0.783571	0.552131	0.596697
TTTCTTTGGCCCGAGTAGAGATTC	TRCN0000491973	10.4	0.46	0.4	0.42	0.35	0.11	-0.2	0.27	0.38	AGTR1	0.43	0.39	-0.05	0.33	0.730301	0.683571	0.452131	0.596697
ATTTTGCGGGACTGGGGTACCCGT	TRCN0000481082	10.26	0.36	0.47	0.23	0.18	0.07	-0.32	0.3	0.35	EFCAB11	0.42	0.21	-0.13	0.33	0.720301	0.503571	0.372131	0.596697
AATTGTCATTACAGGACCGTTAGT	TRCN0000466615	11.61	0.45	0.36	0.28	0.26	0.29	-0.27	0.17	0.49	MGST1	0.4	0.27	0.01	0.33	0.700301	0.563571	0.512131	0.596697
GCATAAATACGCTTCAGCTCCCGC	TRCN0000488600	12.23	0.48	0.44	0.49	0.47	0.2	-0.4	0.35	0.3	MAD2L1	0.46	0.48	-0.1	0.33	0.760301	0.773571	0.402131	0.596697
TTACTTAGAATTTAAACTATGTTT	TRCN0000478724	11.22	0.03	-0.17	0.22	0.24	0.24	-0.43	0.4	0.27	CLEC12A	-0.07	0.23	-0.1	0.33	0.230301	0.523571	0.402131	0.596697
AATACCGTAACCTGTCAAATCGAC	TRCN0000466654	11.65	0.62	0.71	0.56	0.51	0.21	-0.16	0.34	0.33	GPSM3	0.67	0.53	0.03	0.33	0.970301	0.823571	0.532131	0.596697
GCGAAAATCTCACTAACGTTGCCC	TRCN0000477752	11.07	-0.19	-0.12	0.38	0.48	0.06	-0.39	0.28	0.38	TMEM92	-0.16	0.43	-0.16	0.33	0.140301	0.723571	0.342131	0.596697
AGTGTGTTTCCCCGACATCACTAA	TRCN0000478775	11.2	-0.19	-0.25	0.62	0.82	0	-0.47	0.29	0.37	WBP1	-0.22	0.72	-0.23	0.33	0.0803014	1.01357	0.272131	0.596697
CAACTCATGCGGCCACGATTCAGC	TRCN0000475655	10.64	0	-0.31	0.25	0.04	0.68	-0.06	0.33	0.32	HOXD10	-0.16	0.14	0.31	0.32	0.140301	0.433571	0.812131	0.586697
CCCTGTAATGCTATGGACCATCTT	TRCN0000477740	13.61	0.62	0.67	0.52	0.53	0.28	-0.29	0.35	0.27	TMEM136	0.64	0.53	-0.01	0.31	0.940301	0.823571	0.492131	0.576697
ACCATATCCCGGAAACATCTAACC	TRCN0000478850	12.39	0.66	0.77	0.5	0.55	0.23	-0.18	0.33	0.29	C17orf67	0.71	0.52	0.02	0.31	1.0103	0.813571	0.522131	0.576697
ATAATTTACCTAGTTGGACTAGTT	TRCN0000475932	12.07	0.52	0.61	0.41	0.31	0.26	-0.23	0.3	0.33	C20orf166-AS1	0.56	0.36	0.02	0.31	0.860301	0.653571	0.522131	0.576697
CATACATAGATGGGAGACGGGTAC	TRCN0000491543	11.05	0.47	0.53	0.45	0.24	0.22	-0.31	0.24	0.37	IL23A	0.5	0.34	-0.05	0.31	0.800301	0.633571	0.452131	0.576697
ATTTAGCTGAGTGTCTCGTTGAAC	TRCN0000471076	12.11	0.66	0.71	0.47	0.43	0.27	-0.22	0.35	0.28	RNF182	0.68	0.45	0.02	0.31	0.980301	0.743571	0.522131	0.576697
ACAAATTCCAATAGAATATCATGG	TRCN0000472802	10.96	0.29	0.32	0.52	0.33	0.65	-0.27	0.43	0.19	MAB21L2	0.3	0.42	0.19	0.31	0.600301	0.713571	0.692131	0.576697
GCGCGGCCAACGTGTTATAATTCG	TRCN0000479054	12.62	0.62	0.73	0.5	0.5	0.18	-0.3	0.28	0.32	HIST1H3B	0.67	0.5	-0.06	0.3	0.970301	0.793571	0.442131	0.566697
AAACTCCCCTATCGTGTACGCCTT	TRCN0000473688	9.24	0.44	0.61	0.34	0.27	0.24	-0.23	0.37	0.23	C1D	0.53	0.31	0	0.3	0.830301	0.603571	0.502131	0.566697
ATTAGATCCACCATCCACGTACTT	TRCN0000476507	13.16	0.49	0.57	0.41	0.39	0.19	-0.11	0.27	0.33	MRPL52	0.53	0.4	0.04	0.3	0.830301	0.693571	0.542131	0.566697
TTACGAATTCGGGCTGACCTAGGA	TRCN0000492071	7.48	0.7	0.33	0.62	0.45	0.97	-0.24	0.47	0.13	FPR2	0.52	0.54	0.36	0.3	0.820301	0.833571	0.862131	0.566697
CCTCGATACTTAAATCTGTCCCAA	TRCN0000465293	10.83	0.58	0.88	0.48	0.48	-0.02	-0.07	0.4	0.18	C2orf88	0.73	0.48	-0.04	0.29	1.0303	0.773571	0.462131	0.556697
TGCCCCTTCTCCCATTTGAATTAT	TRCN0000469132	11.22	0.68	0.58	0.51	0.59	0.08	-0.29	0.25	0.32	KIAA0087	0.63	0.55	-0.1	0.29	0.930301	0.843571	0.402131	0.556697
ATTACCATCGTTTTCACCGCCTGC	TRCN0000472951	9.29	0.42	0.49	0.3	0.08	0.22	0.07	0.44	0.13	SLC35G2	0.46	0.19	0.15	0.29	0.760301	0.483571	0.652131	0.556697
ATTCAATCCGCAACACTGGTATCC	TRCN0000468673	10.6	0.27	0.16	0.24	0.04	0.34	-0.21	0.31	0.25	PHTF2	0.21	0.14	0.06	0.28	0.510301	0.433571	0.562131	0.546697
CCATCCTCTGCGATCCTGTGGACT	TRCN0000474438	12.79	0.65	0.74	0.53	0.53	0.22	-0.16	0.28	0.26	RABIF	0.69	0.53	0.03	0.27	0.990301	0.823571	0.532131	0.536697
AAGTTATCCTTTACTGGCTCCTAA	TRCN0000478738	10.77	0.5	0.6	0.33	0.35	0.09	-0.22	0.21	0.33	IGF2	0.55	0.34	-0.06	0.27	0.850301	0.633571	0.442131	0.536697
ATTTCATTAGGAGGGTGTCATCGA	TRCN0000473360	10.86	0.36	0.37	0.32	0.24	0.15	-0.27	0.21	0.31	SPATA8	0.36	0.28	-0.06	0.26	0.660301	0.573571	0.442131	0.526697
ATTTGCTCCAATCACCCGAGGAGT	TRCN0000478133	10.09	0.02	-0.04	0.07	0.17	0.42	-0.27	0.24	0.29	RSPH1	-0.01	0.12	0.07	0.26	0.290301	0.413571	0.572131	0.526697
AAGAGTATAGGTTTTCGTTCATTT	TRCN0000489905	13.47	0.43	0.44	0.34	0.25	0.22	-0.28	0.25	0.27	OXER1	0.44	0.3	-0.03	0.26	0.740301	0.593571	0.472131	0.526697
GGTGCCTCAAGGCCCCGAATTATC	TRCN0000468709	9.68	-0.84	-0.93	-0.37	-0.17	-0.03	-0.16	0.2	0.33	TOB1	-0.88	-0.27	-0.09	0.26	-0.579699	0.0235705	0.412131	0.526697
AGCCGAACGTCTCAAACCCCCACC	TRCN0000473666	10.36	0.65	0.82	0.6	0.5	0.09	-0.23	0.23	0.28	FLYWCH2	0.74	0.55	-0.07	0.25	1.0403	0.843571	0.432131	0.516697
TTTTTTCCGCGGAGCCGCCTTAAA	TRCN0000491801	11.36	0.48	0.51	0.41	0.31	0.14	-0.16	0.25	0.26	S100A9	0.49	0.36	-0.01	0.25	0.790301	0.653571	0.492131	0.516697
TAGCTGTAGGACACGTCGAGGTCA	TRCN0000467961	10.71	0.27	0.35	0.31	0.21	0.05	-0.57	0.27	0.23	LRAT	0.31	0.26	-0.26	0.25	0.610301	0.553571	0.242131	0.516697
AATACTCTGCGAGATTAGATTAAA	TRCN0000481385	13.93	0.48	0.48	0.34	0.24	0.22	-0.21	0.25	0.25	C20orf85	0.48	0.29	0	0.25	0.780301	0.583571	0.502131	0.516697
TCACACTGTGCACATCAAGCGATG	TRCN0000480614	12.54	0.46	0.63	0.46	0.41	0.12	-0.13	0.26	0.23	TMEM91	0.54	0.44	-0.01	0.24	0.840301	0.733571	0.492131	0.506697
TGGTAATCCGCTATGATTGAAGTG	TRCN0000468074	11.29	0.59	0.54	0.42	0.46	0.06	-0.37	0.16	0.32	HLA-DQA1	0.56	0.44	-0.16	0.24	0.860301	0.733571	0.342131	0.506697
ATTTCAACAACACGAGCGACACAT	TRCN0000468748	11.94	0.46	0.45	0.3	0.3	0.18	-0.27	0.24	0.25	RAB30	0.46	0.3	-0.04	0.24	0.760301	0.593571	0.462131	0.506697
AAATATTATACTCACTTGAAGAGT	TRCN0000472265	12.57	0.72	0.84	0.49	0.43	0.01	-0.4	0.23	0.26	CRB3	0.78	0.46	-0.2	0.24	1.0803	0.753571	0.302131	0.506697
AATATATCCGGTGGCGGCATTCCT	TRCN0000477247	9.58	0.65	0.61	0.49	0.37	0.66	-0.14	0.21	0.23	C17orf51	0.63	0.43	0.26	0.22	0.930301	0.723571	0.762131	0.486697
ATTTACCAATGCCCGATTCTAAAC	TRCN0000477257	9.99	0.19	0.17	0.17	0.11	0.32	-0.56	0.11	0.32	GNS	0.18	0.14	-0.12	0.22	0.480301	0.433571	0.382131	0.486697
CACCCGCTTATAAACCTACGGCGC	TRCN0000488005	11.65	0.46	0.64	0.48	0.4	0.29	-0.37	0.2	0.22	LOC107987559	0.55	0.44	-0.04	0.21	0.850301	0.733571	0.462131	0.476697
AAATTTCACGTCACTCGCACAGCT	TRCN0000477892	10.39	0.2	0.37	0.28	0.13	0.08	-0.28	0.26	0.15	FAM78B	0.28	0.2	-0.1	0.21	0.580301	0.493571	0.402131	0.476697
ATCTTCTCATTATAATACCATTGG	TRCN0000466272	10.17	0.42	0.56	0.19	0.19	0.13	-0.03	0.1	0.33	CRCT1	0.49	0.19	0.05	0.21	0.790301	0.483571	0.552131	0.476697
AATCGCTCTCGTACGGGGAACGTC	TRCN0000469686	9.55	0.02	-0.13	0.23	0.06	0.2	-0.7	0.2	0.21	ATP6V1E2	-0.06	0.15	-0.25	0.21	0.240301	0.443571	0.252131	0.476697
CTCTTTACTCTGCTCAACTATCTT	TRCN0000469750	11.02	0.4	0.34	0.25	0.31	-0.07	-0.56	0.33	0.09	FCRLA	0.37	0.28	-0.32	0.21	0.670301	0.573571	0.182131	0.476697
ATTCTGAGATCGGGAAGACTGACA	TRCN0000480720	10.79	-0.85	-0.78	-0.59	-0.38	0.43	-0.11	0.06	0.36	PKNOX1	-0.82	-0.48	0.16	0.21	-0.519699	-0.186429	0.662131	0.476697
AACAATTCCGACCGCCCCAGAATA	TRCN0000476415	7.22	-0.33	-0.31	0.23	-0.26	0.5	-0.12	-0.01	0.42	PTPRR	-0.32	-0.01	0.19	0.21	-0.0196986	0.283571	0.692131	0.476697
AACCGTGTTCTCCGCTCTGCTAGG	TRCN0000488177	9.63	0.39	0.47	0.34	0.47	0.35	-0.15	0.3	0.09	AGTR1	0.43	0.4	0.1	0.2	0.730301	0.693571	0.602131	0.466697
CAGCAGTTCGGTCAGAAGCTAACC	TRCN0000467284	11.72	0.34	0.14	0.18	0.25	-0.02	-0.35	0.23	0.16	RGS4	0.24	0.22	-0.18	0.2	0.540301	0.513571	0.322131	0.466697
TTCTTTCTAGCAGAGTCTAGCTCA	TRCN0000469547	11.22	0.42	0.33	0.31	0.28	0.21	-0.36	0.23	0.17	DAOA	0.38	0.3	-0.08	0.2	0.680301	0.593571	0.422131	0.466697
GCAGAACGATTTCGCCTGCAAACG	TRCN0000470558	11.71	0.14	0.09	0.05	0.13	0.07	-0.59	0.26	0.13	GABPB1	0.11	0.09	-0.26	0.2	0.410301	0.383571	0.242131	0.466697
AAACTACTGAGCCCATGATGCACT	TRCN0000467026	11.54	0.07	0.22	0.12	0.08	0.2	-0.24	0.28	0.09	KRTAP10-3	0.14	0.1	-0.02	0.19	0.440301	0.393571	0.482131	0.456697
ATTATTCATTACTGCAATCTGCCG	TRCN0000467329	10.81	0.17	0.31	0.29	0.11	-0.06	-0.3	0.29	0.1	AMIGO1	0.24	0.2	-0.18	0.19	0.540301	0.493571	0.322131	0.456697
TCCCCGTTCATGCTCTGTGGCGCC	TRCN0000469090	10.07	-1.18	-1	-0.61	-0.42	0.34	0.1	0.06	0.32	CEBPE	-1.09	-0.52	0.22	0.19	-0.789699	-0.226429	0.722131	0.456697
CCCTAAGTTCTTCTAGCTCCTGGC	TRCN0000488718	10.73	0.44	0.53	0.46	0.33	0.06	-0.34	0.25	0.12	IDNK	0.48	0.4	-0.14	0.18	0.780301	0.693571	0.362131	0.446697
TTTTAAATTTTCTCGACCTATGTC	TRCN0000489955	13.49	0.45	0.45	0.31	0.18	0.13	-0.38	0.19	0.17	CD59	0.45	0.25	-0.12	0.18	0.750301	0.543571	0.382131	0.446697
CTGTGGAAGGAACAAATTACATTC	TRCN0000489097	12.58	-0.05	-0.19	-0.09	0.06	0.18	-0.46	0.22	0.13	GABRR1	-0.12	-0.02	-0.14	0.18	0.180301	0.273571	0.362131	0.446697
ATTCACTTTCGTACTCCGATATTT	TRCN0000476138	10.9	0.09	0.1	0.13	0.05	0.06	-0.33	0.15	0.2	SULT6B1	0.1	0.09	-0.14	0.17	0.400301	0.383571	0.362131	0.436697
CCTAAAAGTGCTCTCAATCCGGAC	TRCN0000488403	10.11	0.34	0.22	0.21	0.04	-0.11	-0.45	0.11	0.23	NMUR1	0.28	0.12	-0.28	0.17	0.580301	0.413571	0.222131	0.436697
GCAAAGCGCCCATACATGCATAAC	TRCN0000474611	9.44	0.32	0.56	0.26	0.13	0.15	-0.55	0.09	0.23	ZBTB37	0.44	0.2	-0.2	0.16	0.740301	0.493571	0.302131	0.426697
AAAATTCATCATACCTGATTTGCT	TRCN0000474440	12.59	0.34	0.33	0.24	0.18	0.11	-0.38	0.11	0.21	ERLIN2	0.34	0.21	-0.13	0.16	0.640301	0.503571	0.372131	0.426697
CGGATTGTTCATCTCTTCATCCAA	TRCN0000479429	9.4	-0.13	0.2	0.05	0.29	0.08	-0.41	0.11	0.22	CCDC103	0.03	0.17	-0.17	0.16	0.330301	0.463571	0.332131	0.426697
ATTACATATACACACACACACCTC	TRCN0000479961	10.93	0.32	0.26	0.21	0.02	0.36	-0.26	0.15	0.15	SCP2D1	0.29	0.11	0.05	0.15	0.590301	0.403571	0.552131	0.416697
TTTAATATAATGACACCCTCATTT	TRCN0000481461	11.34	0.28	0.26	0.26	0.19	0.08	-0.34	0.1	0.19	C14orf177	0.27	0.22	-0.13	0.15	0.570301	0.513571	0.372131	0.416697
CTGGGAGATCTCTGGGCAATCGTG	TRCN0000478063	10.41	-0.18	-0.04	-0.08	-0.11	0.01	-0.47	0.22	0.08	SPAST	-0.11	-0.09	-0.23	0.15	0.190301	0.203571	0.272131	0.416697
CCGGCCTAGTGTCTTTACATCAGG	TRCN0000468661	11.38	0.3	0.36	0.26	0.12	-0.02	-0.4	0.15	0.13	NO_MATCH_3	0.33	0.19	-0.21	0.14	0.630301	0.483571	0.292131	0.406697
CCTATTTTCACAATCACCCCAGTC	TRCN0000488880	13.68	0.38	0.31	0.25	0.24	0.13	-0.32	0.17	0.1	FCGR3B	0.35	0.25	-0.1	0.14	0.650301	0.543571	0.402131	0.406697
AAATCCTAGTAACGCCCCAATATA	TRCN0000465970	11.76	0.42	0.34	0.23	0.2	0.3	-0.23	0.07	0.21	RIMKLA	0.38	0.21	0.04	0.14	0.680301	0.503571	0.542131	0.406697
ATTTTATTATCGAGGAAGTGACGT	TRCN0000469471	9.69	0.05	0.3	0.24	0.22	0.05	-0.16	0.16	0.12	SHTN1	0.18	0.23	-0.06	0.14	0.480301	0.523571	0.442131	0.406697
CTGTCTCGGGACTTGTCAGACGTT	TRCN0000470709	10.39	0.03	0.06	0.09	-0.12	-0.03	-0.5	0.04	0.24	TMEFF1	0.04	-0.02	-0.27	0.14	0.340301	0.273571	0.232131	0.406697
GTTTTCATATGTACCGAAACAATT	TRCN0000476396	11.4	0.26	0.29	0.19	0.05	0.09	-0.35	0.18	0.11	PF4	0.27	0.12	-0.13	0.14	0.570301	0.413571	0.372131	0.406697
TTCTTCAACGTTCCTACGGTCCTT	TRCN0000470441	11.03	-0.83	-0.93	-0.2	0.09	-0.1	-0.39	0.11	0.17	HAND2	-0.88	-0.05	-0.24	0.14	-0.579699	0.243571	0.262131	0.406697
GTAGGGGTTCACCGAAATCTACAC	TRCN0000466565	10.56	-0.05	-0.02	-0.04	0.01	0.41	-0.52	0.1	0.17	NR2C1	-0.03	-0.02	-0.05	0.13	0.270301	0.273571	0.452131	0.396697
CTGCGCTGTCCGTGCGGGGGCTTC	TRCN0000477788	8.76	0.16	0.3	0.39	0.24	0.1	-1.02	0.01	0.24	SLC9A1	0.23	0.32	-0.46	0.13	0.530301	0.613571	0.0421311	0.396697
ATTTCATTACTAATATTCAGCCAT	TRCN0000465790	10.65	0.17	0.15	0.02	0.01	0.08	-0.47	0.03	0.24	ZNF695	0.16	0.01	-0.19	0.13	0.460301	0.303571	0.312131	0.396697
ATGAGCTACATCCACTGTATTGTG	TRCN0000487755	13.3	0.01	0.02	0.19	0.17	0.16	-0.34	0.11	0.16	TMEM11	0.02	0.18	-0.09	0.13	0.320301	0.473571	0.412131	0.396697
ATATTAAAGGTTTTTGACCAAATC	TRCN0000466398	10.81	0.55	0.48	0.31	0.29	-0.06	-0.24	0.08	0.16	NR2C2AP	0.51	0.3	-0.15	0.12	0.810301	0.593571	0.352131	0.386697
ATATTAAAATGATTAAATACTATC	TRCN0000467237	11.36	0.28	0.2	0.26	0.22	0.1	-0.34	0.09	0.15	LYSMD2	0.24	0.24	-0.12	0.12	0.540301	0.533571	0.382131	0.386697
ATCGGTGCCCCACATGACGGCCCA	TRCN0000470280	11.85	-0.06	0.02	0.18	0.08	0.17	-0.43	0.11	0.12	POU2F2	-0.02	0.13	-0.13	0.12	0.280301	0.423571	0.372131	0.386697
CGTCGGAGACTTGGCAAAATACGA	TRCN0000475203	10.24	0.3	0.12	0.21	0.03	0.4	-0.19	0.18	0.05	CEP57L1	0.21	0.12	0.1	0.11	0.510301	0.413571	0.602131	0.376697
GAACCACTCCTATCCCCCATGTTT	TRCN0000488169	10.04	-1.27	-1.39	-0.85	-0.77	0.29	0.37	0.11	0.11	KRAS	-1.33	-0.81	0.33	0.11	-1.0297	-0.516429	0.832131	0.376697
GAATTTTCATTATTTTCAAGAAAG	TRCN0000470411	11.17	-0.52	-0.55	-0.64	-0.61	0.56	0.31	0.12	0.08	MAS1	-0.54	-0.62	0.43	0.1	-0.239699	-0.326429	0.932131	0.366697
AATTCCCATTGTGATTGGGCCTGC	TRCN0000465533	9.93	0.27	0.23	0.17	0.08	0.21	-0.26	0.18	0.02	ZNF101	0.25	0.12	-0.03	0.1	0.550301	0.413571	0.472131	0.366697
ATTAATGTGCACAAGCTCACAGGT	TRCN0000469752	9.95	0.15	0.2	0.13	0.01	0.1	-0.29	0.11	0.09	SUN3	0.18	0.07	-0.1	0.1	0.480301	0.363571	0.402131	0.366697
GTTTTATTCCGCCCGTACGACTTG	TRCN0000468434	10.58	0.23	0.11	0.09	0.01	0.16	-0.48	0.17	0.03	ITM2A	0.17	0.05	-0.16	0.1	0.470301	0.343571	0.342131	0.366697
CCTGTGTACTCGTGCACAGTCAAC	TRCN0000465509	10.26	0.36	0.16	0.13	0.13	0.3	-0.55	0.03	0.17	BVES	0.26	0.13	-0.12	0.1	0.560301	0.423571	0.382131	0.366697
ACCTTTTTGTAGGTAGTGAGGGCA	TRCN0000473361	10.15	-0.15	-0.13	0.25	0.28	0.21	-0.53	0.08	0.12	GPAT4	-0.14	0.26	-0.16	0.1	0.160301	0.553571	0.342131	0.366697
CATGGCGATGGACTCTTGTAAGTC	TRCN0000465999	10.46	0.54	0.57	0.4	0.39	-0.12	-0.57	0.16	0.02	HIST1H3H	0.56	0.4	-0.34	0.09	0.860301	0.693571	0.162131	0.356697
GGCTGGCTCGGTGGCCAAATAACA	TRCN0000477721	10.85	0.43	0.06	0.2	-0.08	0.34	-0.45	0.1	0.08	LINGO2	0.24	0.06	-0.06	0.09	0.540301	0.353571	0.442131	0.356697
CATCTCTCAGTACAGCCTGTAGCC	TRCN0000473441	9.91	-0.2	0.05	-0.12	-0.27	0.44	-0.55	0.18	0	KRR1	-0.07	-0.19	-0.06	0.09	0.230301	0.103571	0.442131	0.356697
ATATTTTTTCCTGCATAGAGCCCA	TRCN0000476987	11.13	0.16	0.18	0.06	-0.1	-0.08	-0.49	0	0.19	SERPINB13	0.17	-0.02	-0.28	0.09	0.470301	0.273571	0.222131	0.356697
TTGATAACACCTCGTCGTTGATCC	TRCN0000475374	8.76	0.55	0.74	0.8	0.78	0.06	-0.93	0.29	-0.11	JAGN1	0.64	0.79	-0.44	0.09	0.940301	1.08357	0.0621311	0.356697
TCATAGGTGACAAACTCATGTCAC	TRCN0000491879	11.06	0.08	0.21	0.28	0.19	-0.02	-0.55	0.11	0.07	FPR2	0.15	0.24	-0.29	0.09	0.450301	0.533571	0.212131	0.356697
AAATTCCAGCTATTAGCTTCGAGT	TRCN0000474432	11.56	0.21	0.16	0.2	0.11	0.05	-0.3	-0.01	0.2	EGFL7	0.18	0.16	-0.13	0.09	0.480301	0.453571	0.372131	0.356697
GAGTGCCAGCATAGCCTTATCTGC	TRCN0000474411	11.18	-1.48	-1.54	-1	-0.62	0.38	-0.15	0.13	0.05	EGR2	-1.51	-0.81	0.12	0.09	-1.2097	-0.516429	0.622131	0.356697
GCCACATTGATCTTAACCCGACAC	TRCN0000470406	11.63	0.46	0.48	0.5	0.36	0.21	-0.18	0.14	0.02	SCGB2A2	0.47	0.43	0.02	0.08	0.770301	0.723571	0.522131	0.346697
TCACAACACCTCTTCTCGCCAACG	TRCN0000474542	10.94	-0.14	-0.14	0.11	0.15	-0.04	-0.23	0.18	-0.02	VENTX	-0.14	0.13	-0.14	0.08	0.160301	0.423571	0.362131	0.346697
TGCAACACTGCACAATGAAGACAG	TRCN0000474785	11.44	-2.09	-2.09	-0.94	-0.8	0.27	-0.32	0.02	0.13	NKX2-5	-2.09	-0.87	-0.03	0.08	-1.7897	-0.576429	0.472131	0.346697
CCCCTAATTTTTTTCCTGGCACGA	TRCN0000478698	11.08	0.19	0.29	0.34	0.33	0.13	-0.52	0.08	0.06	AUNIP	0.24	0.34	-0.19	0.07	0.540301	0.633571	0.312131	0.336697
TTGCTAGTATCTTCGAGTTCCGGG	TRCN0000489626	11.54	-0.48	-0.38	0.13	0.27	0.12	-0.59	0.13	0.01	CRHR1	-0.43	0.2	-0.24	0.07	-0.129699	0.493571	0.262131	0.336697
AATTATTACTCTATTTATGGACTT	TRCN0000466558	10.35	0.21	0.01	0.05	0	0.06	-0.26	0.06	0.08	SNRNP40	0.11	0.03	-0.1	0.07	0.410301	0.323571	0.402131	0.336697
AAGTCTTGGATCATGTTCTGTATA	TRCN0000475957	10.51	0.17	0.07	0.12	0.08	0.15	-0.47	0.07	0.07	LOC107987587	0.12	0.1	-0.16	0.07	0.420301	0.393571	0.342131	0.336697
ACATGTTCCTATACTGTTACCAAT	TRCN0000477457	11.59	0.42	0.07	0.28	0.13	-0.1	-0.59	0.08	0.05	YAP1	0.24	0.2	-0.35	0.07	0.540301	0.493571	0.152131	0.336697
ATTTAACCAATGCAAACCGGTAGT	TRCN0000481146	11.21	0.32	0.13	0.07	0.03	-0.01	-0.58	-0.02	0.13	CST5	0.22	0.05	-0.3	0.06	0.520301	0.343571	0.202131	0.326697
TTTATATAAATTCTCAGTTGCATG	TRCN0000471039	10.79	0.07	0.09	0.05	0.05	0.19	-0.33	0.03	0.09	MCCC2	0.08	0.05	-0.07	0.06	0.380301	0.343571	0.432131	0.326697
AAACCCGTGACTCAATATTATTCC	TRCN0000478887	10.75	0.04	0.02	-0.01	0.05	-0.1	-0.41	0.01	0.1	PIK3IP1	0.03	0.02	-0.25	0.06	0.330301	0.313571	0.252131	0.326697
TGTTGGCTCTCGCACATGCACCCA	TRCN0000480825	11.65	0.04	0	0.01	0.06	0.01	-0.56	0.09	0.01	CD226	0.02	0.03	-0.28	0.05	0.320301	0.323571	0.222131	0.316697
CCGAGTCATCCTTGGGCCGCATGT	TRCN0000474834	10.13	0.12	-0.05	0.09	-0.02	-0.05	-0.29	-0.02	0.12	SDHC	0.03	0.03	-0.17	0.05	0.330301	0.323571	0.332131	0.316697
TTTTCCTCTAAATTGCCGAATAAT	TRCN0000468155	11.1	0.22	0.11	0.04	0.03	0.11	-0.82	-0.03	0.13	SORD	0.17	0.03	-0.35	0.05	0.470301	0.323571	0.152131	0.316697
ATTTCTAATATTTTCAAATGAGAT	TRCN0000468113	13.34	0.23	0.32	0.17	0.03	0.02	-0.42	0.04	0.05	C1orf50	0.28	0.1	-0.2	0.05	0.580301	0.393571	0.302131	0.316697
ATCCGTGTTTTGCTAGACCATCTC	TRCN0000489110	13.02	-0.58	-0.65	0	0.12	0	-0.56	0.08	0.01	CRHR1	-0.61	0.06	-0.28	0.05	-0.309699	0.353571	0.222131	0.316697
AATCCCTTTGGTATAAACTTCACA	TRCN0000466650	9.62	0.08	0.28	0.01	-0.02	0.16	-0.43	-0.08	0.18	RAB32	0.18	0	-0.13	0.05	0.480301	0.293571	0.372131	0.316697
ATCGATACCACTCCTTATAGAACA	TRCN0000489273	9.84	-1.15	-1.25	-0.81	-0.59	-0.11	-0.31	0.04	0.07	NR2E1	-1.2	-0.7	-0.21	0.05	-0.899699	-0.406429	0.292131	0.316697
TGCATCTCTAGGCTAAAAGATTTC	TRCN0000469628	11.7	0.37	0.41	0.26	0.32	-0.02	-0.33	0.04	0.04	DIO1	0.39	0.29	-0.18	0.04	0.690301	0.583571	0.322131	0.306697
AATAAAAGCTATTTCATATTATAG	TRCN0000468811	11.35	-0.41	-0.5	-0.01	-0.12	-0.06	-0.5	-0.04	0.12	ZADH2	-0.46	-0.06	-0.28	0.04	-0.159699	0.233571	0.222131	0.306697
ACCAAGTCCCGGTGCTTCGATAGA	TRCN0000477494	12.71	0.4	0.39	0.23	0.24	-0.08	-0.47	-0.01	0.08	AP5S1	0.4	0.24	-0.27	0.04	0.700301	0.533571	0.232131	0.306697
CGTGGCACTCAGACCCTCCTAATC	TRCN0000470452	7.99	0.1	-0.32	-0.32	-0.06	0.37	-0.48	-0.24	0.33	TMCC1	-0.11	-0.19	-0.05	0.04	0.190301	0.103571	0.452131	0.306697
CAGCTACTTTAACGGTATTCTCAA	TRCN0000469116	13.1	0.08	-0.08	0.1	0.08	-0.06	-0.61	0.07	-0.01	EIF2B1	0	0.09	-0.34	0.03	0.300301	0.383571	0.162131	0.296697
TCCCAGAAATACCACCCCCGTACA	TRCN0000465615	7.56	0.36	-0.58	0.26	-0.32	-0.6	-1.09	0.22	-0.16	SPATA2	-0.11	-0.03	-0.84	0.03	0.190301	0.263571	-0.337869	0.296697
TAATCCAACAACTTTAAAATGGTT	TRCN0000473760	9.12	0.08	0.23	0.01	-0.31	0.16	-0.3	-0.05	0.11	USP36	0.15	-0.15	-0.07	0.03	0.450301	0.143571	0.432131	0.296697
CCATTTAGCGATTAAATAACAGAA	TRCN0000472199	11.64	0.11	0.26	0.12	0.11	-0.01	-0.43	0.03	0.01	C16orf74	0.19	0.11	-0.22	0.02	0.490301	0.403571	0.282131	0.286697
TAGAGACAACCATCTCAGATCACA	TRCN0000472451	11.6	0.2	0.34	0.11	0.15	-0.06	-0.54	0.13	-0.09	ANAPC13	0.27	0.13	-0.3	0.02	0.570301	0.423571	0.202131	0.286697
TTGACCCCGGGGACCAGCTCTATA	TRCN0000489280	13.57	-0.56	-0.56	-0.33	-0.27	0.25	-0.25	0.03	0.01	P2RY4	-0.56	-0.3	0	0.02	-0.259699	-0.00642946	0.502131	0.286697
ATTTCAAGTCCCCTCAGAGTCCCG	TRCN0000476447	9.92	0.29	0.23	-0.06	-0.07	-0.12	-0.43	0.02	0	SRSF3	0.26	-0.07	-0.27	0.01	0.560301	0.223571	0.232131	0.276697
TGTTACAGCTCGACCGTCGACATC	TRCN0000466160	10.63	0.33	0.48	0.32	0.27	0.05	-0.37	-0.02	0.03	NPPB	0.4	0.29	-0.16	0.01	0.700301	0.583571	0.342131	0.276697
AGTCTACTCTTGAGGACTGGTTCA	TRCN0000489456	12.9	-0.1	-0.26	-0.12	0.04	-0.02	-0.5	0	0.02	IDO1	-0.18	-0.04	-0.26	0.01	0.120301	0.253571	0.242131	0.276697
CTCCGTCGGAACGATTCTATAAGT	TRCN0000488143	9.55	0.28	0.06	0.38	0.38	0.13	-0.29	-0.14	0.16	MRGPRD	0.17	0.38	-0.08	0.01	0.470301	0.673571	0.422131	0.276697
TAACTTCCTAACAATCTACTAAAC	TRCN0000471194	10.23	-0.91	-0.79	-0.17	-0.25	-0.4	-0.56	-0.07	0.09	PRDM14	-0.85	-0.21	-0.48	0.01	-0.549699	0.0835705	0.0221311	0.276697
GGTTCTGTGACTTCCATAACCATG	TRCN0000474179	11.12	0.09	0.33	0.06	0.13	0.12	-0.27	0.02	-0.03	DUT	0.21	0.09	-0.08	0	0.510301	0.383571	0.422131	0.266697
ATGTGTCTCAGCCTTCGAGTTGCC	TRCN0000476461	0	0	0	0	0	0	0	0	0	NPEPPS	0	0	0	0	0.300301	0.293571	0.502131	0.266697
AATATTCTTTATACGACCAGCCAT	TRCN0000469685	9.7	0.06	-0.1	0.01	-0.16	0.04	-0.59	-0.06	0.05	STX8	-0.02	-0.07	-0.28	-0.01	0.280301	0.223571	0.222131	0.256697
CAGGTTAATTCGACCTGCAGCTCA	TRCN0000489947	13.69	0.34	0.29	0.18	0.14	-0.16	-0.48	0.03	-0.07	GHRHR	0.31	0.16	-0.32	-0.02	0.610301	0.453571	0.182131	0.246697
GCGACGAGCCATTATAAGCTGCCG	TRCN0000475376	11.5	0.34	0.3	0.31	0.26	0.09	-0.49	-0.04	-0.02	CCDC115	0.32	0.29	-0.2	-0.03	0.620301	0.583571	0.302131	0.236697
TCGCCTCAGAACCATATACACTTA	TRCN0000477316	12.66	0.19	0.19	0.15	0.07	-0.1	-0.59	-0.04	-0.02	PRSS57	0.19	0.11	-0.35	-0.03	0.490301	0.403571	0.152131	0.236697
ATTTAAACGTCCCCCTTCCGGCAG	TRCN0000481563	9.78	-0.54	-0.94	-0.63	-0.59	0.27	0.04	-0.07	0	GPR52	-0.74	-0.61	0.16	-0.04	-0.439699	-0.316429	0.662131	0.226697
TAGTCACACCGGACTTTGACTTGT	TRCN0000474061	12.04	0.24	0.29	0.1	0.17	-0.18	-0.61	0.05	-0.13	IFT22	0.27	0.13	-0.4	-0.04	0.570301	0.423571	0.102131	0.226697
CCCGAATCATCCACCCTCTATTTT	TRCN0000467590	10.89	0.1	0.25	0.09	0.16	-0.24	-0.37	0.01	-0.1	GAST	0.18	0.13	-0.3	-0.04	0.480301	0.423571	0.202131	0.226697
TTTTTTTAATATGCCATAACCCTT	TRCN0000466205	10.86	0.14	0	0.01	-0.02	-0.02	-0.41	0.01	-0.08	PLSCR4	0.07	-0.01	-0.21	-0.04	0.370301	0.283571	0.292131	0.226697
AATACACATTTATATTTATTTTAA	TRCN0000488087	9.78	0.05	0.12	-0.2	-0.21	-0.08	-0.85	-0.13	0.05	PNLIP	0.09	-0.2	-0.47	-0.04	0.390301	0.0935705	0.0321311	0.226697
CGTCGACTTCACATCGCGCGATCT	TRCN0000477155	10.16	-0.1	-0.31	0.15	0.1	-0.2	-0.76	0.07	-0.15	FMO4	-0.21	0.12	-0.48	-0.04	0.0903014	0.413571	0.0221311	0.226697
AACTGTACCTCATTTCGTGGTGGA	TRCN0000478056	11.13	-0.95	-1.15	-0.3	-0.11	-0.04	-0.56	-0.14	0.06	IRX6	-1.05	-0.2	-0.3	-0.04	-0.749699	0.0935705	0.202131	0.226697
CTGACATGCAGATAACTTGGTTAC	TRCN0000481388	9.18	-0.03	0.37	0.01	0.27	-0.04	-0.32	-0.01	-0.08	VAMP4	0.17	0.14	-0.18	-0.05	0.470301	0.433571	0.322131	0.216697
GGACATTACCCTCCATACGACGTA	TRCN0000489706	13.01	-0.1	-0.15	-0.1	-0.06	-0.14	-0.74	-0.05	-0.04	OR14C36	-0.12	-0.08	-0.44	-0.05	0.180301	0.213571	0.0621311	0.216697
TCACTGTACAGTACAGTCAGCCCA	TRCN0000474562	9.43	-0.05	0.1	-0.06	0.02	-0.27	-0.23	0.15	-0.24	ANKS1B	0.03	-0.02	-0.25	-0.05	0.330301	0.273571	0.252131	0.216697
ATTGAATTAGGCTGATTTGACTCT	TRCN0000467165	10.57	-0.01	0.1	-0.04	-0.09	-0.19	-0.54	0	-0.09	C20orf141	0.05	-0.07	-0.36	-0.05	0.350301	0.223571	0.142131	0.216697
GCGGCTAGGGGATGTCATTGTAAA	TRCN0000488871	11.41	0.11	0.22	0.03	-0.05	0.02	-0.52	0.01	-0.13	OPN1SW	0.17	-0.01	-0.25	-0.06	0.470301	0.283571	0.252131	0.206697
CTTCGACCTAATGCCCACCGAGAT	TRCN0000478359	11.34	-0.26	0.03	0.09	0.12	-0.16	-0.49	-0.04	-0.08	NSG1	-0.12	0.11	-0.33	-0.06	0.180301	0.403571	0.172131	0.206697
TTTAAGAATTCTATTTCCAAAATG	TRCN0000467387	11.31	0.2	0.34	0.01	0.01	-0.25	-0.71	-0.13	0.01	RNF125	0.27	0.01	-0.48	-0.06	0.570301	0.303571	0.0221311	0.206697
TCGTGGCATCAAGGAAGATTCACG	TRCN0000475880	10.43	-0.54	-0.97	-0.49	-0.49	0.28	-0.51	0.05	-0.18	CELF3	-0.76	-0.49	-0.12	-0.06	-0.459699	-0.196429	0.382131	0.206697
ATTATGAATCCCTAAAAGGTGACA	TRCN0000465252	10.13	-0.04	0.21	-0.15	-0.08	0.26	-0.51	-0.06	-0.09	TMED5	0.09	-0.11	-0.13	-0.07	0.390301	0.183571	0.372131	0.196697
CCGCGGTTGTAGGTACATGACAAT	TRCN0000465951	11.15	0.1	0.13	-0.07	-0.18	0.02	-0.55	0.01	-0.16	PCGF1	0.12	-0.12	-0.27	-0.07	0.420301	0.173571	0.232131	0.196697
ATTCAGGCAAATGCCAGCTAATAA	TRCN0000472748	9.97	-0.1	-0.08	-0.08	-0.19	0.01	-0.66	-0.07	-0.07	NUSAP1	-0.09	-0.13	-0.32	-0.07	0.210301	0.163571	0.182131	0.196697
GTAAAGATAGGACGGCTTGTGCTG	TRCN0000471175	10.84	-0.14	-0.14	-0.04	-0.06	-0.14	-0.5	-0.01	-0.13	ELAVL2	-0.14	-0.05	-0.32	-0.07	0.160301	0.243571	0.182131	0.196697
GTTTTACCACTTATGAAAATCCGA	TRCN0000470140	11.78	-0.08	0.01	-0.15	-0.1	-0.19	-0.59	-0.11	-0.02	MED21	-0.03	-0.13	-0.39	-0.07	0.270301	0.163571	0.112131	0.196697
ATCGTACTTTTTCCCCTATTTAAA	TRCN0000479060	12.12	-0.01	0.07	-0.03	-0.1	-0.1	-0.59	-0.01	-0.14	TCEAL8	0.03	-0.06	-0.35	-0.07	0.330301	0.233571	0.152131	0.196697
AATTTGATTGTTCTTGGCAAGCCC	TRCN0000489769	10.34	0.19	0.23	0.18	-0.04	-0.18	-0.47	-0.04	-0.1	CXCR5	0.21	0.07	-0.33	-0.07	0.510301	0.363571	0.172131	0.196697
CACATTATCTCTATAAGATCCTGA	TRCN0000478470	11.79	0.03	0.18	0.1	0.04	-0.22	-0.63	-0.05	-0.11	RPS28	0.1	0.07	-0.43	-0.08	0.400301	0.363571	0.0721311	0.186697
AATGTGCTTGCAATTCCCTGCTGT	TRCN0000489359	13.39	-0.14	-0.3	-0.46	-0.47	0.15	-0.35	-0.12	-0.04	HRH1	-0.22	-0.46	-0.1	-0.08	0.0803014	-0.166429	0.402131	0.186697
TTTTACTTTGTTGACTACGCTTGA	TRCN0000472820	10.35	0.22	0.17	0.06	-0.05	0.11	-0.74	-0.04	-0.12	ARL6IP6	0.19	0.01	-0.31	-0.08	0.490301	0.303571	0.192131	0.186697
TGTTGAATCGGTAACGATGACCTG	TRCN0000475598	10.97	-0.86	-1.31	-0.53	-0.39	0.13	-0.46	-0.01	-0.15	CDX4	-1.08	-0.46	-0.17	-0.08	-0.779699	-0.166429	0.332131	0.186697
CATCATACTGCGAACTCACATAAT	TRCN0000489925	9.94	-0.02	-0.2	-0.4	-0.56	0.48	-0.31	-0.09	-0.1	PTGFR	-0.11	-0.48	0.08	-0.09	0.190301	-0.186429	0.582131	0.176697
TGTATACAGTGCAGACGAGCGACC	TRCN0000470429	10.75	0.06	0	-0.02	0.05	-0.17	-0.64	0.19	-0.37	SCNM1	0.03	0.02	-0.4	-0.09	0.330301	0.313571	0.102131	0.176697
CTGAACCATATCAAATCTGTTGTC	TRCN0000477761	13.13	0.03	-0.05	-0.11	-0.13	-0.12	-0.67	-0.05	-0.12	KRT40	-0.01	-0.12	-0.39	-0.09	0.290301	0.173571	0.112131	0.176697
AATCTTAATGATTTTACGCACATA	TRCN0000469325	9.62	-0.03	-0.39	-0.12	-0.44	-0.07	-0.35	-0.17	-0.01	C17orf62	-0.21	-0.28	-0.21	-0.09	0.0903014	0.0135705	0.292131	0.176697
TAGCAAGCAGGAAAACACGAAGGC	TRCN0000470617	11.18	-0.1	-0.04	0.31	0.17	-0.25	-0.75	-0.19	0	SLC7A8	-0.07	0.24	-0.5	-0.09	0.230301	0.533571	0.00213114	0.176697
CATGCTTGGAATCGAGGCCTGATA	TRCN0000469917	13.4	-0.01	0	-0.12	-0.1	-0.1	-0.66	-0.07	-0.13	XLOC_005712	-0.01	-0.11	-0.38	-0.1	0.290301	0.183571	0.122131	0.166697
AAATATGCGGCTCTGATAAGTTGT	TRCN0000477808	13.63	-0.14	-0.07	-0.12	-0.12	-0.08	-0.51	-0.08	-0.12	NO_MATCH_1	-0.11	-0.12	-0.3	-0.1	0.190301	0.173571	0.202131	0.166697
AATTTAAAATGATCCCAGGCATCA	TRCN0000472482	10.32	-0.18	-0.26	-0.29	-0.37	-0.12	-0.62	-0.12	-0.07	HMBOX1	-0.22	-0.33	-0.37	-0.1	0.0803014	-0.0364295	0.132131	0.166697
AAGTAAGTGTTAATCTAGTACCCT	TRCN0000476429	13.57	-0.03	-0.06	0.04	-0.09	-0.11	-0.62	-0.11	-0.09	TMEM129	-0.05	-0.02	-0.36	-0.1	0.250301	0.273571	0.142131	0.166697
ATAGTCTATCCTTAACTCTGTCAC	TRCN0000466832	11.06	0.19	-0.04	0.14	0.2	-0.26	-0.78	-0.22	0.01	SELENBP1	0.07	0.17	-0.52	-0.1	0.370301	0.463571	-0.0178689	0.166697
GTAGGTGCAAACGCGAGACAGACC	TRCN0000488234	10.17	-0.78	-0.95	-0.73	-0.65	0.33	0	-0.12	-0.09	MAS1	-0.87	-0.69	0.17	-0.11	-0.569699	-0.396429	0.672131	0.156697
AAATCTATTAATGAACCATTCCTC	TRCN0000467786	10.13	0.15	-0.08	0.05	0	-0.05	-0.5	-0.2	-0.02	FTSJ1	0.04	0.02	-0.27	-0.11	0.340301	0.313571	0.232131	0.156697
CTCAGGTTCATGAAGTTACTCGTT	TRCN0000466913	13.34	-0.89	-0.99	-0.79	-0.68	0.2	-0.39	-0.1	-0.12	RBFOX1	-0.94	-0.73	-0.1	-0.11	-0.639699	-0.436429	0.402131	0.156697
AATTGGCTATTAGTACGTGATGGT	TRCN0000488397	11.8	0.09	0.02	-0.12	-0.25	0.04	-0.49	-0.08	-0.16	CYB5A	0.05	-0.18	-0.23	-0.12	0.350301	0.113571	0.272131	0.146697
GCTCAGTGAACATTGTAACGCCGC	TRCN0000489942	10.73	-0.59	-0.59	-0.1	-0.06	0.11	-0.42	-0.05	-0.23	HHEX	-0.59	-0.08	-0.15	-0.14	-0.289699	0.213571	0.352131	0.126697
CCAATAACTATTTATTTGAATGAT	TRCN0000488675	12.35	-0.18	-0.16	-0.21	-0.33	-0.04	-0.75	-0.14	-0.15	FSHR	-0.17	-0.27	-0.4	-0.15	0.130301	0.0235705	0.102131	0.116697
CCTGAATGTTCTTAAATATCAGAC	TRCN0000488966	12.02	-0.22	-0.17	-0.14	-0.18	-0.11	-0.74	-0.05	-0.25	ADK	-0.2	-0.16	-0.43	-0.15	0.100301	0.133571	0.0721311	0.116697
GCATTAGTCACCGACGTAGTGGCC	TRCN0000476278	13.14	-0.02	-0.11	-0.12	-0.25	-0.06	-0.72	-0.18	-0.11	STS	-0.06	-0.18	-0.39	-0.15	0.240301	0.113571	0.112131	0.116697
GAAGAACTCCCCTATATTCGCACA	TRCN0000479337	10.67	0	0.06	0.17	0.1	-0.34	-0.98	-0.21	-0.09	SPPL2C	0.03	0.14	-0.66	-0.15	0.330301	0.433571	-0.157869	0.116697
GCATGGCCAGGCAATCCAATATCG	TRCN0000474925	12.58	-0.78	-0.75	-0.68	-0.62	0.05	-0.35	-0.18	-0.13	LCOR	-0.76	-0.65	-0.15	-0.15	-0.459699	-0.356429	0.352131	0.116697
ATGATTAATCTAATGAATATATAT	TRCN0000471409	10.9	-0.03	0.08	-0.14	-0.06	0	-0.59	-0.24	-0.07	ISG20	0.03	-0.1	-0.29	-0.16	0.330301	0.193571	0.212131	0.106697
CACTTCATGTCTTTCTTATAAGGT	TRCN0000488276	10.51	-0.3	-0.37	-0.38	-0.46	-0.28	-0.75	-0.21	-0.11	GPR141	-0.34	-0.42	-0.51	-0.16	-0.0396986	-0.126429	-0.00786886	0.106697
GGCACACCGTGGTACATCTTCAGG	TRCN0000477017	13.72	-0.12	-0.19	-0.2	-0.14	-0.1	-0.53	-0.14	-0.18	RGL1	-0.16	-0.17	-0.32	-0.16	0.140301	0.123571	0.182131	0.106697
TAAGCGGTCAACCACGCGGAAGTT	TRCN0000480269	11.33	-0.07	-0.25	-0.36	-0.26	0.01	-0.72	-0.17	-0.16	ZRSR2	-0.16	-0.31	-0.35	-0.17	0.140301	-0.0164295	0.152131	0.0966965
TGCTATCACCACCGTACAGGTCCC	BRDN0000559463	10.41	-0.02	0.27	-0.14	0.15	-0.41	-0.83	-0.18	-0.16	HcRed	0.12	0	-0.62	-0.17	0.420301	0.293571	-0.117869	0.0966965
TTTTCCCAACGATACACAACACTC	TRCN0000477560	9.34	-0.02	-0.07	-0.15	-0.22	-0.11	-0.82	-0.2	-0.14	TPRN	-0.04	-0.19	-0.47	-0.17	0.260301	0.103571	0.0321311	0.0966965
ACAAGATATTAACGCTCGGCTGGA	TRCN0000479301	10.82	-0.38	-0.32	-0.27	-0.38	-0.13	-1.11	-0.18	-0.18	FAM234B	-0.35	-0.32	-0.62	-0.18	-0.0496986	-0.0264295	-0.117869	0.0866965
ATTTTGTCCTCTTTTTATGTTTTA	TRCN0000472986	10.13	-0.02	-0.15	-0.2	-0.27	-0.37	-0.97	-0.3	-0.08	NDUFB11	-0.08	-0.23	-0.67	-0.19	0.220301	0.0635705	-0.167869	0.0766965
CACACATTTATCAATTGGGTTTGA	TRCN0000487904	11.59	-0.02	0.07	-0.13	-0.05	-0.06	-0.63	-0.09	-0.29	GPR137B	0.02	-0.09	-0.34	-0.19	0.320301	0.203571	0.162131	0.0766965
TTTCAGTTGACAGCGAGCCCCGTC	TRCN0000467736	12.28	-0.35	-0.31	-0.26	-0.09	-0.3	-0.78	-0.18	-0.2	MCL1	-0.33	-0.17	-0.54	-0.19	-0.0296986	0.123571	-0.0378689	0.0766965
CTCAGGCAAGTTTACGCTTGATTT	TRCN0000465705	10.28	0.1	0.2	-0.2	0.03	-0.23	-0.79	-0.16	-0.3	LHFPL5	0.15	-0.09	-0.51	-0.23	0.450301	0.203571	-0.00786886	0.0366965
AAGTTTTCGTATTTGATCATCATC	TRCN0000475112	9.31	-0.43	-0.39	-0.23	-0.45	-0.3	-0.73	-0.27	-0.18	CNOT7	-0.41	-0.34	-0.52	-0.23	-0.109699	-0.0464295	-0.0178689	0.0366965
ATCCCTGTTCAGGCCCTCTGTGGC	TRCN0000469916	12.5	-0.33	-0.49	-0.35	-0.28	-0.34	-0.87	-0.23	-0.23	PPM1G	-0.41	-0.32	-0.6	-0.23	-0.109699	-0.0264295	-0.0978689	0.0366965
TAGAGATTGGGTTCAACCTGGAAG	BRDN0000559460	10.98	0.18	0.23	0.02	0.03	-0.29	-0.55	-0.15	-0.34	BFP	0.2	0.02	-0.42	-0.24	0.500301	0.313571	0.0821311	0.0266965
GTTATTTAATCTTCACTGGGCATT	TRCN0000478756	8.78	-1.4	-0.97	-0.76	-0.62	-0.3	-0.41	-0.4	-0.09	KATNAL1	-1.18	-0.69	-0.35	-0.24	-0.879699	-0.396429	0.152131	0.0266965
AGGAATATTCAGCGTTATCGATTG	TRCN0000477890	9.44	-0.52	-0.29	0.08	0.18	-0.07	-0.82	-0.26	-0.29	RHOXF2	-0.4	0.13	-0.45	-0.27	-0.0996986	0.423571	0.0521311	-0.00330347
AACCACCCTAACTTCCAACATAGA	TRCN0000488338	9.72	-1.15	-0.97	-0.44	-0.53	0.1	-0.76	-0.17	-0.37	ADRB2	-1.06	-0.49	-0.33	-0.27	-0.759699	-0.196429	0.172131	-0.00330347
AATTAAAATTAATTTAAACTCCAT	TRCN0000471388	9.98	-0.2	-0.35	-0.25	-0.48	-0.23	-0.85	-0.21	-0.33	BCL2L14	-0.28	-0.37	-0.54	-0.27	0.0203014	-0.0764295	-0.0378689	-0.00330347
AATCTCTAACTGCCTTATGGTTAG	TRCN0000467418	11.58	0.02	0.01	-0.14	-0.19	-0.33	-0.7	-0.29	-0.25	ZSCAN2	0.01	-0.16	-0.52	-0.27	0.310301	0.133571	-0.0178689	-0.00330347
ATGCTTGCTGGTTTATCGGAATTG	TRCN0000492142	10.86	-0.33	-0.14	-0.15	-0.21	-0.17	-0.54	-0.27	-0.27	GPR137B	-0.23	-0.18	-0.35	-0.27	0.0703014	0.113571	0.152131	-0.00330347
AATAATATCATATCAACGCCATTC	TRCN0000487975	10.4	-0.28	-0.15	-0.13	-0.27	-0.32	-0.65	-0.44	-0.12	TFE3	-0.22	-0.2	-0.48	-0.28	0.0803014	0.0935705	0.0221311	-0.0133035
ACCAGTCTCTATTACCGGTCTAAT	TRCN0000489156	10.49	-0.11	-0.14	-0.29	-0.04	-0.21	-0.43	-0.03	-0.54	NME5	-0.13	-0.16	-0.32	-0.29	0.170301	0.133571	0.182131	-0.0233035
GACGCACCACACCATATTGAGGCA	TRCN0000467571	10.85	-0.35	-0.35	-0.24	-0.18	-0.21	-0.39	-0.21	-0.37	PTH	-0.35	-0.21	-0.3	-0.29	-0.0496986	0.0835705	0.202131	-0.0233035
ACAACGCGCGAACCACAGAAGTGT	TRCN0000478472	10.96	-0.19	-0.07	-0.24	-0.24	-0.15	-0.71	-0.33	-0.25	SNRNP25	-0.13	-0.24	-0.43	-0.29	0.170301	0.0535705	0.0721311	-0.0233035
AAAAATATTTTTAAAAACTGTATT	TRCN0000480202	10.13	-0.05	-0.07	-0.23	-0.47	-0.38	-0.8	-0.17	-0.42	SLC8B1	-0.06	-0.35	-0.59	-0.29	0.240301	-0.0564295	-0.0878689	-0.0233035
CATGCCTACTCTTAACTAACACAA	TRCN0000471306	9.44	-0.03	-0.28	-0.57	-0.24	-0.44	-1.09	-0.34	-0.28	MRPL13	-0.15	-0.41	-0.76	-0.31	0.150301	-0.116429	-0.257869	-0.0433035
ACTGGGCTGGGAAATTGCTTCGAA	TRCN0000473758	10.12	-0.2	-0.58	-0.22	-0.38	-0.25	-0.63	-0.47	-0.15	NSUN7	-0.39	-0.3	-0.44	-0.31	-0.0896986	-0.00642946	0.0621311	-0.0433035
CTGTTCTCAGCTTGAACAGATATT	TRCN0000466646	10.48	-0.45	-0.67	-0.28	-0.26	-0.82	-1.04	-0.26	-0.38	ZNF513	-0.56	-0.27	-0.93	-0.32	-0.259699	0.0235705	-0.427869	-0.0533035
ATTTTATTCAAGTGATTGCGGGAT	TRCN0000481577	10.63	-0.42	-0.46	-0.34	-0.46	-0.41	-0.53	-0.38	-0.29	RNF34	-0.44	-0.4	-0.47	-0.33	-0.139699	-0.106429	0.0321311	-0.0633035
AATGGGAAATGACATTGAAAATTA	TRCN0000467081	10.83	-0.12	0.01	-0.14	-0.17	-0.42	-0.55	-0.4	-0.31	RAB3A	-0.06	-0.16	-0.49	-0.35	0.240301	0.133571	0.0121311	-0.0833035
AAAGATATTTGATCCCACCCCATA	TRCN0000478294	10.67	-0.62	-0.25	-0.46	-0.34	-0.43	-0.95	-0.38	-0.31	RAB31	-0.43	-0.4	-0.69	-0.35	-0.129699	-0.106429	-0.187869	-0.0833035
CTCTTCCACAATTAAGATATCTAA	TRCN0000476921	11.02	-0.14	-0.32	-0.22	-0.34	-0.17	-0.8	-0.31	-0.39	SBSPON	-0.23	-0.28	-0.49	-0.35	0.0703014	0.0135705	0.0121311	-0.0833035
AGATTAGTCTCTCAATTGTTTGCC	TRCN0000475973	11.3	-0.62	-0.73	-0.86	-0.75	0.19	-0.31	-0.33	-0.39	GPR139	-0.67	-0.8	-0.06	-0.36	-0.369699	-0.506429	0.442131	-0.0933035
AGATACCGAAATCTCCTACCTTCA	TRCN0000479594	9.95	-0.85	-0.79	-0.42	-0.04	-0.28	-0.61	-0.46	-0.27	TMEM171	-0.82	-0.23	-0.45	-0.36	-0.519699	0.0635705	0.0521311	-0.0933035
ATTCAGTTTAGTATGTAATCATAT	TRCN0000480394	10.5	-0.37	-0.32	-0.28	-0.68	-0.28	-0.95	-0.31	-0.44	RDM1	-0.34	-0.48	-0.62	-0.37	-0.0396986	-0.186429	-0.117869	-0.103303
AATTAGGGTTCATCTAGTTGCCCC	TRCN0000479333	8.73	-0.14	-0.32	-0.43	-0.38	-0.17	-0.42	-0.32	-0.42	NFE2L3	-0.23	-0.41	-0.29	-0.37	0.0703014	-0.116429	0.212131	-0.103303
TCCATAAACAGCCGTATAATACCA	TRCN0000470909	13.74	-0.33	-0.5	-0.38	-0.43	-0.51	-0.85	-0.33	-0.45	H2AFV	-0.41	-0.4	-0.68	-0.39	-0.109699	-0.106429	-0.177869	-0.123303
AGATCCGACTTGATGAAACCATGC	TRCN0000469157	11.97	-0.37	-0.65	-0.42	-0.32	-0.38	-0.73	-0.44	-0.37	TMEM239	-0.51	-0.37	-0.55	-0.4	-0.209699	-0.0764295	-0.0478689	-0.133303
AAATTTCCCTTGACGTACATGCCT	TRCN0000476251	8.93	-0.7	-0.5	-0.85	-0.95	-0.65	-1.23	-0.57	-0.26	FKBP9	-0.6	-0.9	-0.94	-0.41	-0.299699	-0.606429	-0.437869	-0.143303
AATTCTCGAGTCCTTGTCACCTCT	TRCN0000474949	10	-0.46	-0.49	-0.16	-0.3	-0.3	-0.95	-0.38	-0.48	NAA30	-0.47	-0.23	-0.63	-0.43	-0.169699	0.0635705	-0.127869	-0.163303
TGCATTTGCAAACCTTTGACACTC	TRCN0000475419	5.08	1.31	-0.2	0.6	1.06	0.38	0.81	0.35	-1.25	KIF26B	0.56	0.83	0.59	-0.45	0.860301	1.12357	1.09213	-0.183303
TTCACACCGTTTACACATAAATGC	TRCN0000489839	10.36	-0.47	-0.32	-0.04	-0.19	-0.27	-0.69	-0.46	-0.46	SLC22A4	-0.39	-0.11	-0.48	-0.46	-0.0896986	0.183571	0.0221311	-0.193303
ACCTATTACAAAGACCAGTAGCTT	TRCN0000467184	10.74	-1.06	-1.12	-1.05	-0.93	0.15	-0.38	-0.51	-0.44	ADORA2A	-1.09	-0.99	-0.11	-0.47	-0.789699	-0.696429	0.392131	-0.203303
TAAATTGCGTAAATAACATGGGTG	TRCN0000491939	7.07	-1.41	-1.2	-2.23	-1.15	-1.11	-1.04	-0.87	-0.11	KIT	-1.31	-1.69	-1.08	-0.49	-1.0097	-1.39643	-0.577869	-0.223303
AAATTGTTGTTGTCACATGCCGTA	TRCN0000473699	10.91	-0.14	-0.11	-0.33	-0.24	-0.21	-0.85	-0.47	-0.53	HIST1H4H	-0.13	-0.29	-0.53	-0.5	0.170301	0.00357054	-0.0278689	-0.233303
CCTGCGAGCTCTCCATCCGATTCC	TRCN0000489001	11	-1.17	-1.01	-1.04	-1.07	-0.19	-0.34	-0.47	-0.54	P2RY6	-1.09	-1.05	-0.27	-0.51	-0.789699	-0.756429	0.232131	-0.243303
TACCCCGAACATCAAACAACACCA	TRCN0000489536	10.85	-0.97	-0.92	-0.9	-0.87	0.08	-0.35	-0.34	-0.68	P2RY6	-0.95	-0.88	-0.13	-0.51	-0.649699	-0.586429	0.372131	-0.243303
GTTTCGTATCGCCGAATCCCTTGT	TRCN0000475749	9.39	-1.58	-1.4	-0.38	-0.23	-0.44	-0.87	-0.54	-0.5	LMX1B	-1.49	-0.3	-0.66	-0.52	-1.1897	-0.00642946	-0.157869	-0.253303
GTCAGCGAGGTTGTTATTGGTCTA	TRCN0000479102	8.47	-0.52	-1.19	-1.28	-0.15	-0.5	-0.17	-0.5	-0.54	PLAC1	-0.86	-0.71	-0.33	-0.52	-0.559699	-0.416429	0.172131	-0.253303
TTCTAATTTCTGACTATTCGACAA	TRCN0000492299	10.38	-0.58	-0.4	0.01	-0.33	-0.58	-1.07	-0.7	-0.36	SLC7A8	-0.49	-0.16	-0.82	-0.53	-0.189699	0.133571	-0.317869	-0.263303
ACCTTGACTCCTCTATATGGAAAT	TRCN0000473127	10.43	-0.74	-0.92	-0.65	-0.04	-0.41	-1.33	-0.66	-0.45	GLRA3	-0.83	-0.34	-0.87	-0.56	-0.529699	-0.0464295	-0.367869	-0.293303
TATTACCGGAGGTAACACAACTTT	TRCN0000475659	12.15	-0.4	-0.47	-0.43	-0.51	-0.56	-0.82	-0.49	-0.63	ZNF645	-0.43	-0.47	-0.69	-0.56	-0.129699	-0.176429	-0.187869	-0.293303
CAGCGTCTACCTTTTTTATGACAA	TRCN0000481285	11.44	-0.68	-0.98	-0.58	-0.47	-0.4	-0.82	-0.56	-0.58	ZNF645	-0.83	-0.52	-0.61	-0.57	-0.529699	-0.226429	-0.107869	-0.303303
AACCTCTGCTACATCAAACACCTG	TRCN0000489321	11.04	-1.53	-1.58	-1.48	-1.09	0.14	-0.19	-0.5	-0.65	ADORA2B	-1.56	-1.29	-0.03	-0.58	-1.2597	-0.996429	0.472131	-0.313303
ACGCTTATTTGACACCTTCAGGCG	TRCN0000479268	9.66	-0.26	-0.89	-0.58	-0.52	-0.51	-1.35	-0.45	-0.73	WDR93	-0.57	-0.55	-0.93	-0.59	-0.269699	-0.256429	-0.427869	-0.323303
CCAAGATCCTGGATCATTTGATTA	TRCN0000480766	9	-0.96	-1.24	-0.71	-1.18	-0.69	-1.33	-0.57	-0.62	EZH1	-1.1	-0.94	-1.01	-0.6	-0.799699	-0.646429	-0.507869	-0.333303
CAGGCACCACGTCTACAAGCTCCA	TRCN0000472098	13.7	-0.76	-0.73	-0.67	-0.61	-0.61	-1.1	-0.59	-0.62	VMA21	-0.74	-0.64	-0.85	-0.6	-0.439699	-0.346429	-0.347869	-0.333303
TAAGTCAAACTCAGAGCCATCCTG	TRCN0000479421	12.16	-0.91	-0.96	-0.91	-0.86	-0.35	-0.5	-0.72	-0.51	GPR68	-0.93	-0.89	-0.42	-0.61	-0.629699	-0.596429	0.0821311	-0.343303
TGGACTCGCCTTACACTTGTAGTA	TRCN0000480006	8.03	-0.57	-1.28	-0.6	-0.59	-0.74	-1.56	-0.72	-0.53	MDM1	-0.92	-0.6	-1.15	-0.62	-0.619699	-0.306429	-0.647869	-0.353303
AATGACAATCCACGGTCATACCGC	TRCN0000488083	8.39	-2.18	-1.44	-1.23	-1.11	-0.18	-0.58	-0.73	-0.62	HRH2	-1.81	-1.17	-0.38	-0.67	-1.5097	-0.876429	0.122131	-0.403303
GACCACGGCGGCAACATTCCAGCA	TRCN0000489751	10.43	-0.97	-0.88	-1.22	-1.08	-0.4	-0.73	-0.65	-0.71	CHRM3	-0.92	-1.15	-0.56	-0.68	-0.619699	-0.856429	-0.0578689	-0.413303
AAGCATTTGTCTGCCTTACTAACC	TRCN0000489784	10.95	-1.01	-0.88	-1.25	-1.09	-0.03	-0.65	-0.67	-0.71	GHSR	-0.95	-1.17	-0.34	-0.69	-0.649699	-0.876429	0.162131	-0.423303
AATCCTCTGCAGCCTTCCGTTTTT	TRCN0000489785	10.1	-0.97	-1.04	-1.24	-1.27	-0.11	-0.5	-0.81	-0.59	GPR139	-1.01	-1.25	-0.31	-0.7	-0.709699	-0.956429	0.192131	-0.433303
TCATGTACGACTTAGTAAATAGAT	TRCN0000488887	11.2	-1.05	-0.82	-1.11	-0.91	-0.28	-0.97	-0.6	-0.8	SLC10A1	-0.93	-1.01	-0.62	-0.7	-0.629699	-0.716429	-0.117869	-0.433303
TGCGCACGATATTATTTTTACCTT	TRCN0000479768	10.41	-1.15	-0.96	-0.35	-0.22	-1.07	-1.5	-0.49	-0.91	TFEB	-1.06	-0.28	-1.29	-0.7	-0.759699	0.0135705	-0.787869	-0.433303
ATCAACAGCGGTTTGTAGCGACGC	TRCN0000488956	10.57	-1.26	-1.08	-1.24	-1.37	-0.19	-0.48	-0.72	-0.7	GPR3	-1.17	-1.31	-0.34	-0.71	-0.869699	-1.01643	0.162131	-0.443303
AAATCCTCGATGAGGCATCCCAAG	TRCN0000491554	9.68	-1.26	-1.19	-1.17	-1.37	0.19	-0.63	-0.48	-0.94	CHRM1	-1.22	-1.27	-0.22	-0.71	-0.919699	-0.976429	0.282131	-0.443303
TTATGTTCGGTTACCGACAGAGCT	TRCN0000488691	11.15	-1.24	-1.45	-1.28	-1.19	-0.26	-0.56	-0.8	-0.63	ADORA2A	-1.34	-1.23	-0.41	-0.72	-1.0397	-0.936429	0.0921311	-0.453303
GGGACTATGCGTTACCATTCATCT	TRCN0000468052	11.31	-1.16	-1.37	-1.59	-1.4	-0.82	-1.16	-0.94	-0.51	GPR4	-1.26	-1.5	-0.99	-0.72	-0.959699	-1.20643	-0.487869	-0.453303
GGCGACATTGCGCTGAAATTTATA	TRCN0000476089	10.64	-0.83	-0.9	-0.59	-0.63	-0.71	-1.41	-0.99	-0.48	SLC26A9	-0.86	-0.61	-1.06	-0.74	-0.559699	-0.316429	-0.557869	-0.473303
CGTAATTCACATTTTCAAATGTAG	TRCN0000488901	10.45	-0.95	-1.04	-0.64	-0.8	-0.61	-1.85	-0.9	-0.6	EIF2AK2	-0.99	-0.72	-1.23	-0.75	-0.689699	-0.426429	-0.727869	-0.483303
TGGAAGCCTTTGGACATCCAACAC	TRCN0000487679	9.35	-1.43	-1.01	-0.75	-0.84	-0.5	-0.52	-0.92	-0.65	MRGPRD	-1.22	-0.8	-0.51	-0.78	-0.919699	-0.506429	-0.00786886	-0.513303
GCTGTGATTAGGCTTCACAGGATT	TRCN0000473508	10.55	-2.27	-1.59	-1.46	-1.33	-0.87	-0.98	-0.79	-0.78	SOX2	-1.93	-1.4	-0.92	-0.78	-1.6297	-1.10643	-0.417869	-0.513303
GCCAAAGGGTCAGTCTTAGTGCCA	TRCN0000469246	7.06	0.03	-0.39	-0.47	-0.2	-0.83	-0.5	-0.73	-0.91	TPH2	-0.18	-0.33	-0.67	-0.82	0.120301	-0.0364295	-0.167869	-0.553303
ACTACGAGTCCGCGGCGGCTTACT	TRCN0000488012	10.24	-1.39	-1.34	-1.42	-1.05	-0.4	-0.46	-0.94	-0.7	MRGPRX4	-1.36	-1.23	-0.43	-0.82	-1.0597	-0.936429	0.0721311	-0.553303
GAAATTCAATCTAGGGCCCATTTG	TRCN0000470107	9.74	-1.14	-1.44	-1.16	-1.02	0.04	-1.24	-0.72	-0.91	KLF12	-1.29	-1.09	-0.6	-0.82	-0.989699	-0.796429	-0.0978689	-0.553303
GGTGTGACAAATGAAATGGTGGTG	TRCN0000488175	10.94	-0.89	-1.28	-1.44	-1	-0.55	-1.09	-0.8	-0.86	GHSR	-1.09	-1.22	-0.82	-0.83	-0.789699	-0.926429	-0.317869	-0.563303
CTGTAATCCTACAAACCTTTAATC	TRCN0000465965	9.58	-0.76	-1.2	-1.13	-1.19	-0.66	-1.75	-0.82	-0.85	YTHDC1	-0.98	-1.16	-1.2	-0.84	-0.679699	-0.866429	-0.697869	-0.573303
AATTTGTACTGATGTGACGGTCAG	TRCN0000477267	8.32	-1.18	-1.44	-0.89	-1.18	-0.4	-0.98	-0.75	-0.94	GLRA1	-1.31	-1.03	-0.69	-0.84	-1.0097	-0.736429	-0.187869	-0.573303
TTCCGCCCTGTATTCCGGTACGTC	TRCN0000465893	8.03	-0.51	-0.63	-0.88	-0.66	-0.94	-1.54	-0.8	-0.89	ENTPD2	-0.57	-0.77	-1.24	-0.84	-0.269699	-0.476429	-0.737869	-0.573303
CCCATGCAAAAGTTGGTATATGAC	TRCN0000491707	10.07	-1.65	-1.44	-1.2	-1.14	-1.18	-1.47	-0.96	-0.76	CDX2	-1.54	-1.17	-1.33	-0.86	-1.2397	-0.876429	-0.827869	-0.593303
CGCAGTATATTACCGTCTGAGTGC	TRCN0000473188	11.45	-1.07	-0.9	-1.19	-0.94	-0.7	-1.41	-0.89	-0.87	MAGEB6	-0.98	-1.06	-1.06	-0.88	-0.679699	-0.766429	-0.557869	-0.613303
TTGTCTCACATGCAGCTCAGCCGT	TRCN0000470436	10.43	-0.82	-1.07	-0.87	-0.8	-0.83	-1.37	-0.75	-1.04	H1FNT	-0.94	-0.84	-1.1	-0.89	-0.639699	-0.546429	-0.597869	-0.623303
GTTGAGTAGATATGCCCGAGGGGC	TRCN0000472033	11.02	-1.17	-1.21	-0.85	-0.7	-0.93	-1.2	-1.07	-0.72	TLE1	-1.19	-0.77	-1.06	-0.9	-0.889699	-0.476429	-0.557869	-0.633303
ATCATTGACACGGGTTCCCTAGTT	TRCN0000488647	9.64	-1.37	-1.53	-1.25	-1.19	-0.49	-0.97	-1.01	-0.81	P2RY11	-1.45	-1.22	-0.73	-0.91	-1.1497	-0.926429	-0.227869	-0.643303
CCGTACCAGTACCTTGATGACTGG	TRCN0000489896	8.41	-1.5	-1.8	-1.18	-1.51	-1.65	-1.36	-0.7	-1.3	PLK4	-1.65	-1.35	-1.51	-1	-1.3497	-1.05643	-1.00787	-0.733303
CTTACGAAATTTCGTCTAAATGAA	TRCN0000489508	12.1	-1.36	-1.33	-1.54	-1.59	-0.79	-1.11	-1.03	-1.02	CHRM5	-1.34	-1.57	-0.95	-1.02	-1.0397	-1.27643	-0.447869	-0.753303
GGTATGATACCTGAGACCCTTGGC	TRCN0000487723	11.12	-1.2	-1.26	-1.25	-1.12	-0.65	-0.9	-1.03	-1.05	GPR68	-1.23	-1.19	-0.78	-1.04	-0.929699	-0.896429	-0.277869	-0.773303
CTAATATACAACCGATTAATCATC	BRDN0000559468	8.41	-1.85	-1.8	-1.68	-0.52	-2.07	-1.3	-1.15	-0.97	LUCIFERASE	-1.82	-1.1	-1.68	-1.06	-1.5197	-0.806429	-1.17787	-0.793303
AACTCTCAAGAATATATTCTAGTC	TRCN0000487803	9.58	-1.78	-1.85	-1.53	-1.9	-0.55	-1.14	-1.28	-0.86	MRGPRX4	-1.82	-1.71	-0.84	-1.07	-1.5197	-1.41643	-0.337869	-0.803303
CTATGATACTTTATCATCGTTCTT	TRCN0000489868	11.09	-1.4	-1.25	-1.71	-1.74	-1	-1.39	-0.97	-1.24	AKT2	-1.32	-1.73	-1.19	-1.1	-1.0197	-1.43643	-0.687869	-0.833303
ACAAGTGTAGACGTAAATCTCAAT	TRCN0000465298	10.81	-0.95	-1.29	-1.38	-1.41	-1.47	-1.7	-1.27	-0.95	FOXR2	-1.12	-1.4	-1.59	-1.11	-0.819699	-1.10643	-1.08787	-0.843303
GCGTGCTTCATTTGTAATAATTTT	TRCN0000470428	11.47	-0.81	-0.72	-1.12	-1.02	-1.32	-1.75	-1.1	-1.22	LRFN4	-0.76	-1.07	-1.53	-1.16	-0.459699	-0.776429	-1.02787	-0.893303
CAAGAGACGTTTCTCGCTTCGGAA	TRCN0000488923	11.98	-0.9	-1.19	-1.45	-1.52	-1.1	-1.05	-1.22	-1.12	AKT1	-1.05	-1.49	-1.08	-1.17	-0.749699	-1.19643	-0.577869	-0.903303
TCAACACGTATCACATCGAGACAA	TRCN0000489648	10.16	-0.9	-1.21	-1.53	-1.27	-1.08	-2.16	-1.02	-1.33	PIK3CA	-1.06	-1.4	-1.62	-1.18	-0.759699	-1.10643	-1.11787	-0.913303
TGCGATAGTATCGTCGGGATTCTG	TRCN0000470327	9.77	-1.04	-1.8	-0.9	-1.15	-1	-1.5	-1.32	-1.06	DES	-1.42	-1.03	-1.25	-1.19	-1.1197	-0.736429	-0.747869	-0.923303
CGCTTGGTTGGTCGACCAACAGTG	TRCN0000468422	11.09	-1.52	-1.47	-1.14	-1.2	-1.05	-1.72	-1.35	-1.06	IFNB1	-1.5	-1.17	-1.39	-1.2	-1.1997	-0.876429	-0.887869	-0.933303
GCCGGGGATTTGTCAAATAGTCTG	TRCN0000479774	8.63	-0.86	-1.15	-0.44	-0.75	-0.81	-1.27	-0.98	-1.45	HEXIM1	-1.01	-0.6	-1.04	-1.21	-0.709699	-0.306429	-0.537869	-0.943303
CTATAATCCGGTGTCTTCCTGATA	TRCN0000487730	9.39	-0.69	-1.17	-1.34	-1.57	-0.74	-2.57	-1.05	-1.51	PIK3CA	-0.93	-1.46	-1.66	-1.28	-0.629699	-1.16643	-1.15787	-1.0133
CGGTCCGACATGAATCACGGGTCG	TRCN0000465481	10.78	-1.52	-1.32	-1.44	-1.39	-0.95	-1.65	-1.33	-1.4	LOC105372824	-1.42	-1.41	-1.3	-1.36	-1.1197	-1.11643	-0.797869	-1.0933
GGCGACGAAAAACCGGATATGAGT	TRCN0000491649	11.3	-1.31	-1.18	-1.46	-1.07	-1.66	-1.98	-1.56	-1.22	CDK18	-1.24	-1.27	-1.82	-1.39	-0.939699	-0.976429	-1.31787	-1.1233
GCAGAGATGTTATTCGGAGACCGA	TRCN0000468228	10.14	-1.46	-1.4	-1.6	-1.24	-1.36	-1.66	-1.34	-1.44	LOC102724428	-1.43	-1.42	-1.51	-1.39	-1.1297	-1.12643	-1.00787	-1.1233
GTAAGTACACCCCTAATCTCTATT	TRCN0000478431	10.17	-1.21	-1.93	-1.47	-1.6	-1.42	-1.53	-1.39	-1.43	EIF3C	-1.57	-1.54	-1.48	-1.41	-1.2697	-1.24643	-0.977869	-1.1433
CCCGCAGAGACAACAGGGACAGAA	TRCN0000466621	10.87	-1.47	-1.51	-1.58	-1.37	-1.6	-2.31	-1.34	-1.49	FUK	-1.49	-1.48	-1.96	-1.41	-1.1897	-1.18643	-1.45787	-1.1433
CGCTTCAACGAGGCTGAGACCTTG	TRCN0000489962	9.23	-2.08	-1.18	-1.18	-1.4	-1.46	-1.78	-1.3	-1.55	AKT1	-1.63	-1.29	-1.62	-1.43	-1.3297	-0.996429	-1.11787	-1.1633
GAAAGCGCCTCCCTATTTAAGAGC	TRCN0000478961	9.65	-1.65	-1.22	-1.25	-1.22	-1.18	-1.59	-1.82	-1.08	RBL1	-1.44	-1.23	-1.39	-1.45	-1.1397	-0.936429	-0.887869	-1.1833
TGAGCCCCTGCAGCTATTTTACCA	TRCN0000470266	10.06	-1.43	-2	-1.74	-1.66	-1.27	-1.7	-1.62	-1.32	DGKK	-1.71	-1.7	-1.48	-1.47	-1.4097	-1.40643	-0.977869	-1.2033
CGCACAAGAAGGTCTTGTTCACCG	TRCN0000489129	9.18	-1.27	-1.95	-2.07	-1.55	-0.88	-2.01	-1.26	-1.82	PKN1	-1.61	-1.81	-1.45	-1.54	-1.3097	-1.51643	-0.947869	-1.2733
CTGCCGAGGCGACATTCCTTCCAT	TRCN0000492138	10.83	-1.86	-1.65	-1.51	-1.72	-1.48	-2.5	-1.67	-1.53	LDLR	-1.75	-1.61	-1.99	-1.6	-1.4497	-1.31643	-1.48787	-1.3333
CCGTAGCTAACTGCAGGACGGTTG	TRCN0000479538	9.88	-2.13	-1.48	-1.8	-1.5	-1.69	-3.43	-1.91	-1.44	FAM126A	-1.8	-1.65	-2.56	-1.68	-1.4997	-1.35643	-2.05787	-1.4133
ATCTCTAGAACCGTATCCGAGGAC	TRCN0000489844	6.16	-1.48	-1.48	-1.58	-2.22	-0.22	-2.05	-1.42	-2.02	CHRM3	-1.48	-1.9	-1.14	-1.72	-1.1797	-1.60643	-0.637869	-1.4533
ACTTGGATTACCTTAAGGATGCAC	TRCN0000478423	8.83	-2.3	-1.9	-2.24	-2.15	-1.83	-3.53	-1.77	-1.91	EXOC3L4	-2.1	-2.2	-2.68	-1.84	-1.7997	-1.90643	-2.17787	-1.5733
TTAGTATTCACTACGCCGAACGAT	TRCN0000488878	11.52	-2.39	-2.54	-2.41	-2.04	-1.36	-1.81	-1.86	-2.01	BRS3	-2.46	-2.22	-1.58	-1.93	-2.1597	-1.92643	-1.07787	-1.6633
CGAGTCAGGCCAAGCGTAAAACTA	TRCN0000479184	10.37	-2.08	-2.53	-1.9	-1.98	-1.41	-2.14	-1.87	-2.08	GSE1	-2.31	-1.94	-1.77	-1.97	-2.0097	-1.64643	-1.26787	-1.7033
TGCGAAAACAAGTACTTATGAAAC	TRCN0000489060	10.07	-2.36	-2.63	-1.9	-2.18	-1.29	-2.03	-2	-2.03	SIK3	-2.5	-2.04	-1.66	-2.02	-2.1997	-1.74643	-1.15787	-1.7533
TCACCCGCGCCAACGTTTCGGTAA	TRCN0000472901	10	-0.99	-2.3	-1.68	-1.56	-1.81	-1.98	-2.03	-2.15	PPP3CA	-1.64	-1.62	-1.89	-2.09	-1.3397	-1.32643	-1.38787	-1.8233
CAGCACAACACGTATGAATTGTCG	TRCN0000491940	9.87	-3.64	-3.63	-2.77	-2.7	-2.13	-2.83	-2.29	-2.46	ABL1	-3.64	-2.73	-2.48	-2.37	-3.3397	-2.43643	-1.97787	-2.1033
TGGGAGGTTGGTTGCGCTCGGTCT	TRCN0000477551	9.79	-4.28	-2.87	-2.34	-1.98	-2.3	-2.84	-2.7	-2.41	RHBDF1	-3.57	-2.16	-2.57	-2.56	-3.2697	-1.86643	-2.06787	-2.2933
TAGAACGACTTTGCCCCAGTTTGC	TRCN0000467335	10.09	-3.09	-2.97	-3.54	-3.1	-2.7	-3.31	-3.01	-2.52	SLC38A2	-3.03	-3.32	-3	-2.77	-2.7297	-3.02643	-2.49787	-2.5033
CGATTCCTAACACCTTCTAACGTC	TRCN0000489612	10.61	-3.27	-3.78	-2.59	-2.83	-2.94	-2.81	-2.66	-2.89	ABL1	-3.53	-2.71	-2.87	-2.77	-3.2297	-2.41643	-2.36787	-2.5033
TCATACGTCGTTGTAGGAGTTGAG	TRCN0000489832	9.17	-4.17	-3.4	-3.41	-3.03	-3.15	-3.82	-2.74	-3.09	ADGRB1	-3.78	-3.22	-3.49	-2.91	-3.4797	-2.92643	-2.98787	-2.6433
CACGTTCAACGGACCGGCACAGGT	TRCN0000473947	10.01	-3.29	-3.53	-3.55	-3.16	-3.18	-3.31	-3.1	-2.76	PNPLA6	-3.41	-3.35	-3.24	-2.93	-3.1097	-3.05643	-2.73787	-2.6633
CGGAATCACTATGTGAGCATTTTA	TRCN0000476551	8.81	-4.98	-3.16	-3.08	-2.89	-1.88	-2.82	-3.68	-2.5	TSC2	-4.07	-2.99	-2.35	-3.09	-3.7697	-2.69643	-1.84787	-2.8233
GCTCTGCAATATGTCCCCTAACAA	TRCN0000488984	10.96	-5.5	-6.28	-4.17	-4.8	-3.67	-4.66	-4.16	-3.47	GRM2	-5.89	-4.49	-4.16	-3.82	-5.5897	-4.19643	-3.65787	-3.5533
CAACAGTGTCCCACATATTTGTGC	TRCN0000487845	12.06	-4.78	-5.74	-4.34	-4	-3.21	-4.51	-3.96	-3.73	MC1R	-5.26	-4.17	-3.86	-3.85	-4.9597	-3.87643	-3.35787	-3.5833
TCACACGCACCCTCACTTTTGATT	TRCN0000476198	13.43	-7.75	-8.27	-5	-4.74	-3.76	-4.84	-4.23	-4.06	ZNF124	-8.01	-4.87	-4.3	-4.15	-7.7097	-4.57643	-3.79787	-3.8833
TCAACGTTTGTTTCGGCCGTGTCA	TRCN0000488594	13.24	-7.85	-6.79	-5.11	-4.99	-3.55	-4.71	-4.4	-3.9	NEDD9	-7.32	-5.05	-4.13	-4.15	-7.0197	-4.75643	-3.62787	-3.8833
CTAAACTTGTAGTCCTCTCTTCAA	TRCN0000472405	13	-7.76	-7.36	-4.77	-4.86	-3.57	-4.66	-4.24	-4.12	LOC254896	-7.56	-4.82	-4.12	-4.18	-7.2597	-4.52643	-3.61787	-3.9133
GGCCAGACATCGATCTACGTGTAA	TRCN0000468835	12.71	-7.91	-7.44	-5.05	-4.75	-3.53	-5.02	-4.39	-4.15	DPH5	-7.68	-4.9	-4.27	-4.27	-7.3797	-4.60643	-3.76787	-4.0033

## Sheet: Kuramochi
Construct Barcode	Construct IDs	Kuramochi; ETP-AVE	LFC-Kuramochi; Rep A-DMSO	LFC-Kuramochi; Rep B-DMSO	LFC-Kuramochi; Rep A-Cisplatin	LFC-Kuramochi; Rep B-Cisplatin	LFC-Kuramochi; Rep A-Paclitaxel	LFC-Kuramochi; Rep B-Paclitaxel	LFC-Kuramochi; Rep A Cis/Pac	LFC-Kuramochi; Rep B-Cis/Pac	Gene Symbol	LFC-AVE Kuramochi DMSO	LFC-AVE Kuramochi Cisplatin	LFC-AVE Kuramochi Paclitaxel	LFC-AVE Kuramochi Cis/Pac	Z score LFC AVE Kuramochi DMSO	Z-score LFC AVE Kuramochi Cisplatin	Z-score LFC AVE Kuramochi Paclitaxel	Z-score LFC AVE Kuramochi Cis/Pac
TATGCTACCACAGAGAAAGCAATC	TRCN0000489920	11.78	0.1	0.17	0.65	0.63	0.61	0.56	0.57	0.69	BCL2L1	0.13	0.64	0.58	0.63	0.371412	0.761495	0.681247	0.689178
CACTTATCCGGTGATTTCCGTTCC	TRCN0000489662	11.33	-0.28	-0.31	0.12	0.1	0.18	0.16	0.36	0.31	BCL2	-0.29	0.11	0.17	0.34	-0.0485877	0.231495	0.271247	0.399178
GAGGAAGGTATGTCTCAAGAGCCT	TRCN0000481607	11.54	0.22	0.26	0.16	0.12	-0.16	-0.09	-0.01	0.05	TFAP2A	0.24	0.14	-0.13	0.02	0.481412	0.261495	-0.0287531	0.0791779
CGCGCAGAGAGTGGTAGCATGAGA	TRCN0000472603	11.68	0	0.09	0.22	0.2	0.13	0.19	0.21	0.18	BCL2L1	0.04	0.21	0.16	0.2	0.281412	0.331495	0.261247	0.259178
TTAAGTTAGCCAGTTCCTGTGTAT	TRCN0000466971	11.54	0.12	0.15	0.42	0.42	0.42	0.39	0.45	0.7	BCL2L2	0.13	0.42	0.41	0.58	0.371412	0.541495	0.511247	0.639178
TCCCAGCGGTGCCATATTCAAGAA	TRCN0000478807	12.12	0.13	0.37	-0.11	-0.04	-0.08	-0.11	-0.15	-0.05	HOXB5	0.25	-0.08	-0.1	-0.1	0.491412	0.0414947	0.00124693	-0.0408221
AACTTAACGGTGGATGGACTATTT	TRCN0000488582	10.08	0.03	0.09	0.21	0.14	0.18	0.06	0.2	0.18	MTNR1A	0.06	0.18	0.12	0.19	0.301412	0.301495	0.221247	0.249178
TTTAATTGGTCCCGACCCTGACGG	TRCN0000470423	10.82	0.75	0.78	0.47	0.46	0.55	0.34	0.38	0.39	MCUB	0.77	0.47	0.45	0.39	1.01141	0.591495	0.551247	0.449178
ATAGCTATCTCCCGGGACGTGTCA	TRCN0000471310	11.05	0.68	0.79	0.47	0.4	0.51	0.39	0.47	0.37	TPRKB	0.74	0.43	0.45	0.42	0.981412	0.551495	0.551247	0.479178
GAGTTCTCCAAGCTCTACCCGGCA	TRCN0000488298	11.48	0.56	0.51	0.26	0.2	0.31	0.24	0.26	0.14	XCR1	0.53	0.23	0.28	0.2	0.771412	0.351495	0.381247	0.259178
GGGTGGCCTTCCAATCGAATCCGG	TRCN0000491657	11.39	0.91	0.94	0.52	0.35	0.5	0.2	0.32	0.34	ADAM18	0.93	0.43	0.35	0.33	1.17141	0.551495	0.451247	0.389178
GCATCTACGAGAAACTCACGATTC	TRCN0000468770	11.46	-1.15	-1.28	0.41	0.37	0.49	0.45	0.34	0.36	OOSP2	-1.22	0.39	0.47	0.35	-0.978588	0.511495	0.571247	0.409178
TTTAGACTTTACCCGAATAGCCTG	TRCN0000487862	9.35	0.87	0.83	0.4	0.34	0.5	0.51	0.47	0.43	NPY6R	0.85	0.37	0.51	0.45	1.09141	0.491495	0.611247	0.509178
ATTTCTGGGCCGTCCCAATGTTAA	TRCN0000475067	11	0.36	0.45	0.09	0.14	0.23	0.08	0.18	0.12	PRSS50	0.4	0.11	0.16	0.15	0.641412	0.231495	0.261247	0.209178
AGCTGCCTATGTCGCTAGTTCGCG	TRCN0000480858	10.66	0.27	0.35	0.34	0.3	0.35	0.2	0.21	0.23	MAGEA10	0.31	0.32	0.27	0.22	0.551412	0.441495	0.371247	0.279178
TAGAGTTTCTAATTTAAAATTTCG	TRCN0000473478	13.48	-0.23	-0.19	-0.01	0.01	-0.03	-0.01	-0.08	-0.01	SOX15	-0.21	0	-0.02	-0.04	0.0314123	0.121495	0.0812469	0.0191779
TACCGGACATGCTCACTGTGCGAA	TRCN0000479505	12.34	-0.35	-0.41	-0.02	-0.08	-0.08	-0.11	-0.12	-0.12	LHX9	-0.38	-0.05	-0.1	-0.12	-0.138588	0.0714947	0.00124693	-0.0608221
CATCGTGCTCTTATCCACGACTTA	TRCN0000470093	11.87	0.66	0.8	0.45	0.29	0.28	0.21	0.2	0.24	OR1D4	0.73	0.37	0.24	0.22	0.971412	0.491495	0.341247	0.279178
TTTTCTCCCGAAAAATCGGCTAGC	TRCN0000465727	10.84	0.48	0.58	0.36	0.27	0.27	0.25	0.29	0.28	CRYGB	0.53	0.31	0.26	0.28	0.771412	0.431495	0.361247	0.339178
ATCTCCGTACTTGCCCGGGTCCCA	TRCN0000488895	10.04	0.56	0.6	0.2	0.22	0.23	0.18	0.21	0.1	GPR148	0.58	0.21	0.21	0.16	0.821412	0.331495	0.311247	0.219178
AAATCAAACTTCCTGGTAGGATAA	TRCN0000471385	10.1	0.63	0.49	0.36	0.35	0.38	0.27	0.34	0.31	LIPT1	0.56	0.36	0.32	0.32	0.801412	0.481495	0.421247	0.379178
AATTATCATCGCCGGACTTAGCGC	TRCN0000472393	10.37	0.38	0.47	0.19	0.25	0.24	0.21	0.23	0.25	NO_MATCH_2	0.43	0.22	0.23	0.24	0.671412	0.341495	0.331247	0.299178
AACCTTCGCATCCTACTTACCTGC	TRCN0000481113	10	0.46	0.41	0.22	0.13	0.29	0.08	0.38	0.13	PRKRA	0.43	0.17	0.18	0.25	0.671412	0.291495	0.281247	0.309178
ATCTGATTTGAGGTGCGCTCTGGT	TRCN0000489151	9.76	0.48	0.42	0.32	0.24	0.22	0.14	0.15	0.21	MCHR2	0.45	0.28	0.18	0.18	0.691412	0.401495	0.281247	0.239178
AAACTTCCGAGGCGCTCTATTTCC	TRCN0000489099	11.06	0.76	0.7	0	0.02	0.21	0.1	0.14	0.04	PAX8	0.73	0.01	0.16	0.09	0.971412	0.131495	0.261247	0.149178
GATTTGTTGGGGAGTATTTCCTAT	TRCN0000491641	9.89	0.51	0.6	0.17	0.17	0.33	0.24	0.33	0.18	OR2T33	0.55	0.17	0.28	0.25	0.791412	0.291495	0.381247	0.309178
GACAGTGACTAATAAATACGGATT	TRCN0000489830	11.44	0.36	0.44	0.3	0.19	0.33	0.17	0.29	0.25	PRKRA	0.4	0.25	0.25	0.27	0.641412	0.371495	0.351247	0.329178
CCTTGAAGTGCATAAATCAGGCCT	TRCN0000477356	12.03	0.61	0.81	0.46	0.36	0.34	0.25	0.23	0.23	XLOC_l2_004840	0.71	0.41	0.29	0.23	0.951412	0.531495	0.391247	0.289178
ATTTGTCTTAAGCCCCAATTCGAT	TRCN0000478038	11.24	0.35	0.37	0.19	0.11	0.13	0.13	0.17	0.15	CD276	0.36	0.15	0.13	0.16	0.601412	0.271495	0.231247	0.219178
TGTGAAGGTACTCGGCAACAGACC	TRCN0000467871	11.69	0.17	0.16	0.38	0.24	0.28	0.11	0.23	0.16	MBNL1	0.17	0.31	0.2	0.2	0.411412	0.431495	0.301247	0.259178
CCCCCCGTTGCCTCCGAACCGCCC	TRCN0000476206	11.71	0.75	0.92	0.46	0.4	0.41	0.22	0.22	0.3	C1orf189	0.83	0.43	0.32	0.26	1.07141	0.551495	0.421247	0.319178
AAATCCTAGGCTATCCATTGGTCA	TRCN0000476606	10.49	0.58	0.44	0.31	0.23	0.32	0.29	0.17	0.27	CLEC4A	0.51	0.27	0.31	0.22	0.751412	0.391495	0.411247	0.279178
GTTTCCCTTAAGACACCTTTAAGG	TRCN0000469495	10.92	0.56	0.56	0.39	0.37	0.35	0.38	0.35	0.33	XLOC_001973	0.56	0.38	0.37	0.34	0.801412	0.501495	0.471247	0.399178
ATGTAAATTTGCTACCACATTGCC	TRCN0000470460	11	0.43	0.51	0.34	0.28	0.26	0.21	0.28	0.18	GPR18	0.47	0.31	0.23	0.23	0.711412	0.431495	0.331247	0.289178
AAGCCATTCTAAATTGATGACAAC	TRCN0000488150	10.88	0.39	0.39	0.17	0.19	0.18	0.11	0.18	0.1	GPR148	0.39	0.18	0.14	0.14	0.631412	0.301495	0.241247	0.199178
AAATGTCCGGTGCGTTCCCTTGTG	TRCN0000473177	11.15	0.44	0.39	0.22	0.22	0.18	0.1	0.13	0.15	SPEM1	0.41	0.22	0.14	0.14	0.651412	0.341495	0.241247	0.199178
ATTATTCTTTATCTTACTGATCAA	TRCN0000469185	13.92	0.32	0.37	0.17	0.17	0.19	0.18	0.19	0.19	RNF183	0.35	0.17	0.18	0.19	0.591412	0.291495	0.281247	0.249178
GTTTATGGACCATTTTACGGGACA	TRCN0000466741	11.2	0.35	0.33	0.12	0.1	0.17	0.15	0.12	0.07	SPSB2	0.34	0.11	0.16	0.09	0.581412	0.231495	0.261247	0.149178
GTTAACATTTTCCCTTTAATCATC	TRCN0000481111	11.96	0.57	0.5	0.41	0.35	0.42	0.34	0.32	0.35	PTGFR	0.53	0.38	0.38	0.33	0.771412	0.501495	0.481247	0.389178
TTTTTATCTTACACCTCATACCGT	TRCN0000468087	11.34	0.49	0.36	0.24	0.16	0.26	0.26	0.24	0.19	C15orf41	0.42	0.2	0.26	0.21	0.661412	0.321495	0.361247	0.269178
ATGGTATAAATTGTCACCCAACTA	TRCN0000489029	11.33	0.36	0.32	0.13	0.1	0.14	0.1	0.1	0.11	GPSM3	0.34	0.12	0.12	0.11	0.581412	0.241495	0.221247	0.169178
TCACCCCCGGCTCTAACTCCCCCA	TRCN0000466454	11.3	0.21	0.43	0.34	0.24	0.23	0.15	0.08	0.1	TMEM140	0.32	0.29	0.19	0.09	0.561412	0.411495	0.291247	0.149178
TTCGCAATTCTTGTCATTTGACGT	TRCN0000469674	8.3	0.07	-0.46	0.08	0.21	-0.04	-0.04	0.18	0.13	MITF	-0.2	0.15	-0.04	0.15	0.0414123	0.271495	0.0612469	0.209178
GCAGGGGGAGTTCGGTCCGTCCTT	TRCN0000467907	11.28	0.72	0.9	0.53	0.35	0.43	0.28	0.24	0.36	HCST	0.81	0.44	0.36	0.3	1.05141	0.561495	0.461247	0.359178
AACCTATTACAGCCGGGGGGAGCC	TRCN0000478908	9.86	0.42	0.26	0.33	0.21	0.3	0.21	0.26	0.27	MBNL2	0.34	0.27	0.26	0.27	0.581412	0.391495	0.361247	0.329178
ACCTTGCCGGTCCCAGTAATTCAA	TRCN0000479953	9.3	0.33	0.16	0.2	0.03	0.23	0.03	0.08	-0.12	MEOX2	0.25	0.12	0.13	-0.02	0.491412	0.241495	0.231247	0.0391779
AAGAAGACCAACCGCAGCCACAGC	TRCN0000470161	11.34	0.6	0.63	0.4	0.34	0.39	0.24	0.23	0.25	GAS2	0.61	0.37	0.31	0.24	0.851412	0.491495	0.411247	0.299178
AAGTTTTCTGGCCCAGCAACTTAC	TRCN0000469164	8.88	0.48	0.54	0.3	0.57	0.34	0.2	0.31	0.22	GNRHR	0.51	0.44	0.27	0.26	0.751412	0.561495	0.371247	0.319178
ATTTTGTGCCGACTTTTCAACGTC	TRCN0000467220	10.51	0.41	0.45	0.28	0.15	0.32	0.22	0.3	0.14	PLPP5	0.43	0.21	0.27	0.22	0.671412	0.331495	0.371247	0.279178
TTTTGTCCAGGTGGATTAATGGTT	TRCN0000479993	10.93	0.45	0.42	0.18	0.08	0.21	0.13	0.05	0.19	PRSS21	0.43	0.13	0.17	0.12	0.671412	0.251495	0.271247	0.179178
AAATGCTCCTACAAGTTCTTCCTC	TRCN0000480136	10.68	0.4	0.42	0.14	0.25	0.26	0.03	0.26	0.23	SLC13A2	0.41	0.2	0.15	0.25	0.651412	0.321495	0.251247	0.309178
AATTCTTATTAATATCATCTCGCC	TRCN0000479485	10.59	0.36	0.21	0.16	0.22	0.19	0.16	0.18	0.19	LIF	0.29	0.19	0.18	0.19	0.531412	0.311495	0.281247	0.249178
CACCATGCATATCGTTTGGTCCTA	TRCN0000470802	11.63	0.52	0.61	0.17	0.23	0.21	0.12	0.06	0.12	FAM58A	0.57	0.2	0.16	0.09	0.811412	0.321495	0.261247	0.149178
CGCTCCGTGGGGCTCTGGCCCCCA	TRCN0000480815	11.99	0.54	0.57	0.31	0.19	0.25	0.14	0.13	0.13	LCN15	0.56	0.25	0.19	0.13	0.801412	0.371495	0.291247	0.189178
GCATGGGCCGAGCGCATTTCGCGG	TRCN0000478069	12.04	0.68	0.67	0.43	0.33	0.33	0.2	0.25	0.22	FAM27E4	0.68	0.38	0.27	0.23	0.921412	0.501495	0.371247	0.289178
CTCGCGGCTGGCTCAATGGGTCCT	TRCN0000480602	11.05	0.61	0.7	0.36	0.27	0.32	0.17	0.19	0.19	NECTIN3	0.66	0.32	0.25	0.19	0.901412	0.441495	0.351247	0.249178
TAGACGGGCCTAACCTCCAGGAAC	TRCN0000474365	12.08	0.51	0.6	0.26	0.19	0.24	0.14	0.14	0.13	NIPA1	0.55	0.23	0.19	0.14	0.791412	0.351495	0.291247	0.199178
CAGCTTGTCTGTGGCCGCCGGAAC	TRCN0000470455	11.15	0.49	0.59	0.23	0.15	0.19	0.14	0.18	0.13	CLDND2	0.54	0.19	0.17	0.16	0.781412	0.311495	0.271247	0.219178
TTTCTTTGGCCCGAGTAGAGATTC	TRCN0000491973	10.32	0.48	0.4	0.41	0.28	0.32	0.27	0.25	0.42	AGTR1	0.44	0.35	0.29	0.33	0.681412	0.471495	0.391247	0.389178
ATTTTGCGGGACTGGGGTACCCGT	TRCN0000481082	10.07	0.43	0.46	0.16	0.19	0.34	0.24	0.25	0.18	EFCAB11	0.44	0.17	0.29	0.22	0.681412	0.291495	0.391247	0.279178
AATTGTCATTACAGGACCGTTAGT	TRCN0000466615	11.49	0.44	0.43	0.25	0.22	0.34	0.19	0.18	0.14	MGST1	0.44	0.24	0.26	0.16	0.681412	0.361495	0.361247	0.219178
GCATAAATACGCTTCAGCTCCCGC	TRCN0000488600	12.1	0.43	0.38	0.21	0.23	0.15	0.13	0.22	0.14	MAD2L1	0.41	0.22	0.14	0.18	0.651412	0.341495	0.241247	0.239178
TTACTTAGAATTTAAACTATGTTT	TRCN0000478724	11.17	0.39	0.36	0.2	0.16	0.25	0.2	0.12	0.21	CLEC12A	0.38	0.18	0.22	0.16	0.621412	0.301495	0.321247	0.219178
AATACCGTAACCTGTCAAATCGAC	TRCN0000466654	11.59	0.32	0.37	0.15	0.14	0.2	0.17	0.23	0.15	GPSM3	0.34	0.14	0.18	0.19	0.581412	0.261495	0.281247	0.249178
GCGAAAATCTCACTAACGTTGCCC	TRCN0000477752	11.07	0.24	0.24	0.22	0.12	0.12	0.14	0.17	0.12	TMEM92	0.24	0.17	0.13	0.15	0.481412	0.291495	0.231247	0.209178
AGTGTGTTTCCCCGACATCACTAA	TRCN0000478775	11.21	0.19	0.3	0.14	0.04	0.1	0.09	0.03	0.04	WBP1	0.24	0.09	0.09	0.04	0.481412	0.211495	0.191247	0.0991779
CAACTCATGCGGCCACGATTCAGC	TRCN0000475655	10.77	0.4	0.3	0.33	0.24	0.27	0.12	0.31	0.07	HOXD10	0.35	0.29	0.19	0.19	0.591412	0.411495	0.291247	0.249178
CCCTGTAATGCTATGGACCATCTT	TRCN0000477740	13.35	0.65	0.75	0.42	0.32	0.35	0.22	0.25	0.27	TMEM136	0.7	0.37	0.29	0.26	0.941412	0.491495	0.391247	0.319178
ACCATATCCCGGAAACATCTAACC	TRCN0000478850	12.19	0.59	0.76	0.4	0.27	0.37	0.28	0.14	0.24	C17orf67	0.67	0.33	0.32	0.19	0.911412	0.451495	0.421247	0.249178
ATAATTTACCTAGTTGGACTAGTT	TRCN0000475932	12.01	0.49	0.58	0.33	0.26	0.34	0.19	0.22	0.21	C20orf166-AS1	0.54	0.29	0.27	0.21	0.781412	0.411495	0.371247	0.269178
CATACATAGATGGGAGACGGGTAC	TRCN0000491543	10.97	0.41	0.5	0.21	0.27	0.15	0.03	0.06	0.18	IL23A	0.46	0.24	0.09	0.12	0.701412	0.361495	0.191247	0.179178
ATTTAGCTGAGTGTCTCGTTGAAC	TRCN0000471076	11.96	0.39	0.4	0.18	0.19	0.21	0.17	0.21	0.14	RNF182	0.4	0.19	0.19	0.17	0.641412	0.311495	0.291247	0.229178
ACAAATTCCAATAGAATATCATGG	TRCN0000472802	11.03	0.22	0.23	0.06	0	0.03	-0.05	0.06	-0.06	MAB21L2	0.23	0.03	-0.01	0	0.471412	0.151495	0.0912469	0.0591779
GCGCGGCCAACGTGTTATAATTCG	TRCN0000479054	12.45	0.62	0.68	0.37	0.34	0.28	0.26	0.18	0.29	HIST1H3B	0.65	0.35	0.27	0.24	0.891412	0.471495	0.371247	0.299178
AAACTCCCCTATCGTGTACGCCTT	TRCN0000473688	9.11	0.61	0.64	0.21	0.37	0.4	0.14	0.28	0.21	C1D	0.62	0.29	0.27	0.25	0.861412	0.411495	0.371247	0.309178
ATTAGATCCACCATCCACGTACTT	TRCN0000476507	13.04	0.44	0.47	0.27	0.24	0.25	0.18	0.19	0.25	MRPL52	0.45	0.26	0.22	0.22	0.691412	0.381495	0.321247	0.279178
TTACGAATTCGGGCTGACCTAGGA	TRCN0000492071	7.39	0.3	0.24	0.28	-0.26	0.06	0.17	0.34	0.09	FPR2	0.27	0.01	0.11	0.21	0.511412	0.131495	0.211247	0.269178
CCTCGATACTTAAATCTGTCCCAA	TRCN0000465293	10.56	0.63	0.74	0.45	0.25	0.39	0.29	0.21	0.26	C2orf88	0.68	0.35	0.34	0.24	0.921412	0.471495	0.441247	0.299178
TGCCCCTTCTCCCATTTGAATTAT	TRCN0000469132	11.05	0.55	0.62	0.31	0.33	0.25	0.17	0.09	0.1	KIAA0087	0.59	0.32	0.21	0.1	0.831412	0.441495	0.311247	0.159178
ATTACCATCGTTTTCACCGCCTGC	TRCN0000472951	9.17	0.34	0.23	0.23	0.23	0.31	0.17	0.31	0.11	SLC35G2	0.29	0.23	0.24	0.21	0.531412	0.351495	0.341247	0.269178
ATTCAATCCGCAACACTGGTATCC	TRCN0000468673	10.58	0.39	0.34	0.18	0	0.26	0.11	0.31	0.24	PHTF2	0.36	0.09	0.19	0.28	0.601412	0.211495	0.291247	0.339178
CCATCCTCTGCGATCCTGTGGACT	TRCN0000474438	12.55	0.51	0.62	0.37	0.23	0.24	0.17	0.11	0.14	RABIF	0.56	0.3	0.2	0.13	0.801412	0.421495	0.301247	0.189178
AAGTTATCCTTTACTGGCTCCTAA	TRCN0000478738	10.66	0.22	0.25	0.12	0.09	0.06	0.1	0.04	-0.02	IGF2	0.23	0.11	0.08	0.01	0.471412	0.231495	0.181247	0.0691779
ATTTCATTAGGAGGGTGTCATCGA	TRCN0000473360	10.78	0.4	0.38	0.29	0.32	0.26	0.22	0.16	0.22	SPATA8	0.39	0.31	0.24	0.19	0.631412	0.431495	0.341247	0.249178
ATTTGCTCCAATCACCCGAGGAGT	TRCN0000478133	10.1	0.36	0.34	0.31	0.21	0.21	0.1	0.2	0.22	RSPH1	0.35	0.26	0.15	0.21	0.591412	0.381495	0.251247	0.269178
AAGAGTATAGGTTTTCGTTCATTT	TRCN0000489905	13.6	0.27	0.24	0.07	0.06	0.11	0.08	0.08	0.07	OXER1	0.26	0.06	0.09	0.07	0.501412	0.181495	0.191247	0.129178
GGTGCCTCAAGGCCCCGAATTATC	TRCN0000468709	9.82	-0.02	-0.1	0.28	0.51	0.34	0.17	0.39	0.24	TOB1	-0.06	0.39	0.26	0.32	0.181412	0.511495	0.361247	0.379178
AGCCGAACGTCTCAAACCCCCACC	TRCN0000473666	10.2	0.55	0.74	0.22	0.28	0.26	0.19	0.06	0.12	FLYWCH2	0.64	0.25	0.23	0.09	0.881412	0.371495	0.331247	0.149178
TTTTTTCCGCGGAGCCGCCTTAAA	TRCN0000491801	11.19	0.47	0.45	0.31	0.18	0.27	0.23	0.2	0.19	S100A9	0.46	0.25	0.25	0.2	0.701412	0.371495	0.351247	0.259178
TAGCTGTAGGACACGTCGAGGTCA	TRCN0000467961	10.66	0.37	0.37	0.24	0.08	0.04	0.08	0.04	-0.01	LRAT	0.37	0.16	0.06	0.02	0.611412	0.281495	0.161247	0.0791779
AATACTCTGCGAGATTAGATTAAA	TRCN0000481385	13.85	0.3	0.33	0.17	0.2	0.19	0.18	0.2	0.16	C20orf85	0.32	0.18	0.19	0.18	0.561412	0.301495	0.291247	0.239178
TCACACTGTGCACATCAAGCGATG	TRCN0000480614	12.45	0.47	0.67	0.29	0.2	0.22	0.15	0.12	0.13	TMEM91	0.57	0.25	0.19	0.12	0.811412	0.371495	0.291247	0.179178
TGGTAATCCGCTATGATTGAAGTG	TRCN0000468074	11.09	0.41	0.46	0.25	0.19	0.23	0.13	0.12	0.14	HLA-DQA1	0.44	0.22	0.18	0.13	0.681412	0.341495	0.281247	0.189178
ATTTCAACAACACGAGCGACACAT	TRCN0000468748	11.84	0.39	0.34	0.21	0.17	0.21	0.18	0.26	0.22	RAB30	0.37	0.19	0.19	0.24	0.611412	0.311495	0.291247	0.299178
AAATATTATACTCACTTGAAGAGT	TRCN0000472265	12.49	0.14	0.11	0.15	0.22	0.12	0.11	0.1	0.13	CRB3	0.12	0.18	0.12	0.12	0.361412	0.301495	0.221247	0.179178
AATATATCCGGTGGCGGCATTCCT	TRCN0000477247	9.53	0.63	0.46	0.26	0.22	0.31	0.22	0.23	0.17	C17orf51	0.54	0.24	0.26	0.2	0.781412	0.361495	0.361247	0.259178
ATTTACCAATGCCCGATTCTAAAC	TRCN0000477257	9.97	0.12	-0.09	-0.01	0.11	0.18	0.16	0.22	0.04	GNS	0.02	0.05	0.17	0.13	0.261412	0.171495	0.271247	0.189178
CACCCGCTTATAAACCTACGGCGC	TRCN0000488005	11.46	0.56	0.59	0.2	0.17	0.22	0.16	0.19	0.19	LOC107987559	0.58	0.19	0.19	0.19	0.821412	0.311495	0.291247	0.249178
AAATTTCACGTCACTCGCACAGCT	TRCN0000477892	10.36	0.46	0.29	0.16	0.1	0.1	0.12	0.14	0.04	FAM78B	0.38	0.13	0.11	0.09	0.621412	0.251495	0.211247	0.149178
ATCTTCTCATTATAATACCATTGG	TRCN0000466272	10.15	0.26	0.35	0.24	0.15	0.12	0.11	0.14	0.16	CRCT1	0.3	0.2	0.12	0.15	0.541412	0.321495	0.221247	0.209178
AATCGCTCTCGTACGGGGAACGTC	TRCN0000469686	9.56	0.22	0.22	0.17	-0.02	0.07	0.11	0.13	0.03	ATP6V1E2	0.22	0.07	0.09	0.08	0.461412	0.191495	0.191247	0.139178
CTCTTTACTCTGCTCAACTATCTT	TRCN0000469750	11.02	0.12	0.19	0.06	-0.01	0.11	0.03	-0.06	0.09	FCRLA	0.15	0.02	0.07	0.02	0.391412	0.141495	0.171247	0.0791779
ATTCTGAGATCGGGAAGACTGACA	TRCN0000480720	10.93	-0.07	-0.21	-0.14	-0.15	-0.08	-0.02	-0.01	-0.04	PKNOX1	-0.14	-0.14	-0.05	-0.02	0.101412	-0.0185053	0.0512469	0.0391779
AACAATTCCGACCGCCCCAGAATA	TRCN0000476415	7.42	0.06	-0.45	0.02	0.09	-0.03	0.08	0.42	-0.18	PTPRR	-0.2	0.05	0.02	0.12	0.0414123	0.171495	0.121247	0.179178
AACCGTGTTCTCCGCTCTGCTAGG	TRCN0000488177	9.61	0.54	0.56	0.17	0.21	0.32	0.11	0.18	0.15	AGTR1	0.55	0.19	0.21	0.16	0.791412	0.311495	0.311247	0.219178
CAGCAGTTCGGTCAGAAGCTAACC	TRCN0000467284	11.69	0.38	0.49	0.2	0.14	0.23	0.1	0.13	0.18	RGS4	0.43	0.17	0.17	0.16	0.671412	0.291495	0.271247	0.219178
TTCTTTCTAGCAGAGTCTAGCTCA	TRCN0000469547	11.11	0.39	0.41	0.32	0.22	0.37	0.17	0.27	0.25	DAOA	0.4	0.27	0.27	0.26	0.641412	0.391495	0.371247	0.319178
GCAGAACGATTTCGCCTGCAAACG	TRCN0000470558	11.67	0.24	0.29	0.17	0.05	0.12	0.05	0.1	0.11	GABPB1	0.27	0.11	0.08	0.11	0.511412	0.231495	0.181247	0.169178
AAACTACTGAGCCCATGATGCACT	TRCN0000467026	11.68	0.21	0.17	0.18	0.09	0.13	0.05	0.09	0.04	KRTAP10-3	0.19	0.13	0.09	0.07	0.431412	0.251495	0.191247	0.129178
ATTATTCATTACTGCAATCTGCCG	TRCN0000467329	10.83	0.03	-0.02	-0.01	0.01	0.05	0.02	-0.02	0.06	AMIGO1	0.01	0	0.04	0.02	0.251412	0.121495	0.141247	0.0791779
TCCCCGTTCATGCTCTGTGGCGCC	TRCN0000469090	10.18	-0.65	-0.62	0.29	0.23	0.19	0.24	0.12	0.06	CEBPE	-0.63	0.26	0.22	0.09	-0.388588	0.381495	0.321247	0.149178
CCCTAAGTTCTTCTAGCTCCTGGC	TRCN0000488718	10.6	0.6	0.74	0.27	0.26	0.28	0.3	0.12	0.11	IDNK	0.67	0.27	0.29	0.11	0.911412	0.391495	0.391247	0.169178
TTTTAAATTTTCTCGACCTATGTC	TRCN0000489955	13.3	0.26	0.29	0.13	0.11	0.14	0.12	0.15	0.13	CD59	0.27	0.12	0.13	0.14	0.511412	0.241495	0.231247	0.199178
CTGTGGAAGGAACAAATTACATTC	TRCN0000489097	12.56	0.21	0.19	0.11	0.02	0.06	0	0.09	0.05	GABRR1	0.2	0.07	0.03	0.07	0.441412	0.191495	0.131247	0.129178
ATTCACTTTCGTACTCCGATATTT	TRCN0000476138	10.92	0.33	0.18	0.19	0.11	0.11	0.15	0.11	0.12	SULT6B1	0.25	0.15	0.13	0.11	0.491412	0.271495	0.231247	0.169178
CCTAAAAGTGCTCTCAATCCGGAC	TRCN0000488403	10.13	0.09	0.23	0.02	-0.03	-0.25	-0.19	-0.03	0.01	NMUR1	0.16	-0.01	-0.22	-0.01	0.401412	0.111495	-0.118753	0.0491779
GCAAAGCGCCCATACATGCATAAC	TRCN0000474611	9.45	0.25	0.35	0.38	0.36	0.24	0.25	0.23	0.21	ZBTB37	0.3	0.37	0.25	0.22	0.541412	0.491495	0.351247	0.279178
AAAATTCATCATACCTGATTTGCT	TRCN0000474440	12.49	0.1	0.15	0.09	0.05	0.11	0.08	0.13	0.05	ERLIN2	0.13	0.07	0.1	0.09	0.371412	0.191495	0.201247	0.149178
CGGATTGTTCATCTCTTCATCCAA	TRCN0000479429	9.4	0.03	0.15	0.16	0.05	0.16	-0.12	-0.37	0.03	CCDC103	0.09	0.1	0.02	-0.17	0.331412	0.221495	0.121247	-0.110822
ATTACATATACACACACACACCTC	TRCN0000479961	10.91	0.35	0.36	0.25	0.24	0.23	0.1	0.16	0.2	SCP2D1	0.36	0.25	0.17	0.18	0.601412	0.371495	0.271247	0.239178
TTTAATATAATGACACCCTCATTT	TRCN0000481461	11.2	0.24	0.34	0.24	0.17	0.16	0.12	0.13	0.22	C14orf177	0.29	0.2	0.14	0.18	0.531412	0.321495	0.241247	0.239178
CTGGGAGATCTCTGGGCAATCGTG	TRCN0000478063	10.41	-0.1	0.14	0.1	0.01	0.12	0.1	0.17	0.04	SPAST	0.02	0.05	0.11	0.1	0.261412	0.171495	0.211247	0.159178
CCGGCCTAGTGTCTTTACATCAGG	TRCN0000468661	11.21	0.4	0.56	0.19	0.25	0.14	0.07	0.08	0.13	NO_MATCH_3	0.48	0.22	0.1	0.11	0.721412	0.341495	0.201247	0.169178
CCTATTTTCACAATCACCCCAGTC	TRCN0000488880	13.58	0.42	0.42	0.24	0.2	0.21	0.13	0.17	0.2	FCGR3B	0.42	0.22	0.17	0.19	0.661412	0.341495	0.271247	0.249178
AAATCCTAGTAACGCCCCAATATA	TRCN0000465970	11.67	0.26	0.28	0.03	0.13	0.13	0.06	0.12	0.07	RIMKLA	0.27	0.08	0.09	0.1	0.511412	0.201495	0.191247	0.159178
ATTTTATTATCGAGGAAGTGACGT	TRCN0000469471	9.58	0.19	0.34	0.08	0.22	0.23	0.2	0.23	0.12	SHTN1	0.26	0.15	0.21	0.18	0.501412	0.271495	0.311247	0.239178
CTGTCTCGGGACTTGTCAGACGTT	TRCN0000470709	10.4	0.16	0.07	0.11	0.1	0.15	0.05	0.05	0	TMEFF1	0.11	0.11	0.1	0.02	0.351412	0.231495	0.201247	0.0791779
GTTTTCATATGTACCGAAACAATT	TRCN0000476396	11.31	-0.01	0.01	0.01	0.05	0.07	0.07	0.1	0.08	PF4	0	0.03	0.07	0.09	0.241412	0.151495	0.171247	0.149178
TTCTTCAACGTTCCTACGGTCCTT	TRCN0000470441	11.06	-0.06	-0.19	0.07	0.06	0.09	-0.04	-0.02	0.11	HAND2	-0.13	0.06	0.03	0.04	0.111412	0.181495	0.131247	0.0991779
GTAGGGGTTCACCGAAATCTACAC	TRCN0000466565	10.58	0.3	0.05	0.06	0.12	0.12	0.01	0.13	0.08	NR2C1	0.17	0.09	0.06	0.11	0.411412	0.211495	0.161247	0.169178
CTGCGCTGTCCGTGCGGGGGCTTC	TRCN0000477788	8.78	0.13	0.07	-0.22	-0.07	-0.15	-0.07	0.01	-0.18	SLC9A1	0.1	-0.14	-0.11	-0.08	0.341412	-0.0185053	-0.00875307	-0.0208221
ATTTCATTACTAATATTCAGCCAT	TRCN0000465790	10.63	0.05	-0.16	-0.02	0.05	0.06	0.12	0.1	0.03	ZNF695	-0.06	0.01	0.09	0.06	0.181412	0.131495	0.191247	0.119178
ATGAGCTACATCCACTGTATTGTG	TRCN0000487755	13.32	-0.33	-0.39	-0.08	-0.07	-0.06	-0.02	-0.06	-0.07	TMEM11	-0.36	-0.08	-0.04	-0.07	-0.118588	0.0414947	0.0612469	-0.0108221
ATATTAAAGGTTTTTGACCAAATC	TRCN0000466398	10.7	0.39	0.51	0.19	0.28	0.22	0.19	0.16	0.18	NR2C2AP	0.45	0.24	0.2	0.17	0.691412	0.361495	0.301247	0.229178
ATATTAAAATGATTAAATACTATC	TRCN0000467237	11.23	0.31	0.36	0.19	0.06	0.19	0.16	0.13	0.16	LYSMD2	0.33	0.12	0.18	0.14	0.571412	0.241495	0.281247	0.199178
ATCGGTGCCCCACATGACGGCCCA	TRCN0000470280	12.04	0.09	0.11	0	0.01	-0.09	-0.04	0.02	-0.02	POU2F2	0.1	0.01	-0.07	0	0.341412	0.131495	0.0312469	0.0591779
CGTCGGAGACTTGGCAAAATACGA	TRCN0000475203	10.22	0.52	0.43	0.33	0.05	0.19	0.12	0.02	0.1	CEP57L1	0.48	0.19	0.16	0.06	0.721412	0.311495	0.261247	0.119178
GAACCACTCCTATCCCCCATGTTT	TRCN0000488169	9.87	-0.93	-0.93	0.52	0.39	0.41	0.34	0.3	0.35	KRAS	-0.93	0.46	0.37	0.33	-0.688588	0.581495	0.471247	0.389178
GAATTTTCATTATTTTCAAGAAAG	TRCN0000470411	11.06	0.42	0.58	0.42	0.38	0.35	0.34	0.42	0.38	MAS1	0.5	0.4	0.34	0.4	0.741412	0.521495	0.441247	0.459178
AATTCCCATTGTGATTGGGCCTGC	TRCN0000465533	9.89	0.3	0.23	0.17	0.19	0.34	0.1	0.14	0.15	ZNF101	0.26	0.18	0.22	0.14	0.501412	0.301495	0.321247	0.199178
ATTAATGTGCACAAGCTCACAGGT	TRCN0000469752	9.94	0.26	-0.03	0.07	0.18	0.08	0.22	0.21	0.14	SUN3	0.12	0.12	0.15	0.17	0.361412	0.241495	0.251247	0.229178
GTTTTATTCCGCCCGTACGACTTG	TRCN0000468434	10.44	0.07	0.1	0.07	0.1	0.19	0.06	0.16	0.17	ITM2A	0.09	0.09	0.12	0.17	0.331412	0.211495	0.221247	0.229178
CCTGTGTACTCGTGCACAGTCAAC	TRCN0000465509	10.27	0.06	0.06	0.11	0.06	0.21	-0.01	-0.02	0.12	BVES	0.06	0.08	0.1	0.05	0.301412	0.201495	0.201247	0.109178
ACCTTTTTGTAGGTAGTGAGGGCA	TRCN0000473361	10.18	0.01	-0.1	0.05	0	0.07	-0.06	-0.06	-0.14	GPAT4	-0.04	0.02	0.01	-0.1	0.201412	0.141495	0.111247	-0.0408221
CATGGCGATGGACTCTTGTAAGTC	TRCN0000465999	10.35	0.25	0.43	-0.04	0.19	0.03	-0.02	0.06	0.08	HIST1H3H	0.34	0.08	0.01	0.07	0.581412	0.201495	0.111247	0.129178
GGCTGGCTCGGTGGCCAAATAACA	TRCN0000477721	10.8	0.26	0.18	0.07	-0.01	0.19	-0.02	0.11	0.09	LINGO2	0.22	0.03	0.08	0.1	0.461412	0.151495	0.181247	0.159178
CATCTCTCAGTACAGCCTGTAGCC	TRCN0000473441	9.95	0.27	0.1	-0.02	0	0.05	0.1	0.04	0	KRR1	0.18	-0.01	0.07	0.02	0.421412	0.111495	0.171247	0.0791779
ATATTTTTTCCTGCATAGAGCCCA	TRCN0000476987	11.1	0.18	0.12	0.11	0.07	0.12	0.17	0.18	0.09	SERPINB13	0.15	0.09	0.15	0.13	0.391412	0.211495	0.251247	0.189178
TTGATAACACCTCGTCGTTGATCC	TRCN0000475374	8.74	0.17	0.03	0.27	-0.05	0.36	0.08	0.37	0	JAGN1	0.1	0.11	0.22	0.19	0.341412	0.231495	0.321247	0.249178
TCATAGGTGACAAACTCATGTCAC	TRCN0000491879	11.08	0.12	0.01	-0.13	-0.05	0.04	0.02	-0.07	-0.02	FPR2	0.06	-0.09	0.03	-0.04	0.301412	0.0314947	0.131247	0.0191779
AAATTCCAGCTATTAGCTTCGAGT	TRCN0000474432	11.67	-0.1	-0.06	-0.11	-0.09	-0.05	-0.06	-0.05	-0.03	EGFL7	-0.08	-0.1	-0.05	-0.04	0.161412	0.0214947	0.0512469	0.0191779
GAGTGCCAGCATAGCCTTATCTGC	TRCN0000474411	11.56	-0.69	-0.92	-0.2	-0.21	-0.21	-0.14	-0.14	-0.16	EGR2	-0.8	-0.2	-0.18	-0.15	-0.558588	-0.0785053	-0.0787531	-0.0908221
GCCACATTGATCTTAACCCGACAC	TRCN0000470406	11.45	0.58	0.65	0.28	0.25	0.4	0.28	0.31	0.21	SCGB2A2	0.61	0.26	0.34	0.26	0.851412	0.381495	0.441247	0.319178
TCACAACACCTCTTCTCGCCAACG	TRCN0000474542	11.02	0.21	-0.03	0.28	0.25	0.19	0.22	0.22	0.17	VENTX	0.09	0.27	0.2	0.19	0.331412	0.391495	0.301247	0.249178
TGCAACACTGCACAATGAAGACAG	TRCN0000474785	11.87	-1.21	-1.37	-0.54	-0.37	-0.43	-0.34	-0.39	-0.33	NKX2-5	-1.29	-0.45	-0.39	-0.36	-1.04859	-0.328505	-0.288753	-0.300822
CCCCTAATTTTTTTCCTGGCACGA	TRCN0000478698	11.02	0.37	0.4	0.22	0.15	0.19	0.18	-0.01	0.04	AUNIP	0.38	0.19	0.19	0.02	0.621412	0.311495	0.291247	0.0791779
TTGCTAGTATCTTCGAGTTCCGGG	TRCN0000489626	11.58	0.17	0.12	-0.1	-0.04	0.05	0.01	0.08	0.03	CRHR1	0.15	-0.07	0.03	0.05	0.391412	0.0514947	0.131247	0.109178
AATTATTACTCTATTTATGGACTT	TRCN0000466558	10.32	0.12	0.01	0.07	0.12	0.07	0.14	0.2	0.04	SNRNP40	0.07	0.09	0.1	0.12	0.311412	0.211495	0.201247	0.179178
AAGTCTTGGATCATGTTCTGTATA	TRCN0000475957	10.47	0.17	-0.06	0.1	0	0.14	0.07	0.14	0.04	LOC107987587	0.06	0.05	0.11	0.09	0.301412	0.171495	0.211247	0.149178
ACATGTTCCTATACTGTTACCAAT	TRCN0000477457	11.75	-0.33	-0.55	-0.28	-0.33	-0.25	-0.21	-0.19	-0.28	YAP1	-0.44	-0.3	-0.23	-0.24	-0.198588	-0.178505	-0.128753	-0.180822
ATTTAACCAATGCAAACCGGTAGT	TRCN0000481146	11.14	0.19	0.17	-0.04	0.13	0.11	0.06	-0.02	0.02	CST5	0.18	0.04	0.09	0	0.421412	0.161495	0.191247	0.0591779
TTTATATAAATTCTCAGTTGCATG	TRCN0000471039	10.82	0.17	0.1	0.1	0.18	0.13	0.15	0.2	0.11	MCCC2	0.13	0.14	0.14	0.15	0.371412	0.261495	0.241247	0.209178
AAACCCGTGACTCAATATTATTCC	TRCN0000478887	10.88	-0.17	-0.15	-0.03	-0.1	-0.03	-0.11	-0.06	-0.09	PIK3IP1	-0.16	-0.07	-0.07	-0.07	0.0814123	0.0514947	0.0312469	-0.0108221
TGTTGGCTCTCGCACATGCACCCA	TRCN0000480825	11.62	0.31	0.24	0.16	0.05	0.01	-0.04	0.04	0.02	CD226	0.28	0.11	-0.02	0.03	0.521412	0.231495	0.0812469	0.0891779
CCGAGTCATCCTTGGGCCGCATGT	TRCN0000474834	10.18	0.29	0.26	0.09	0.03	0.06	0.01	-0.1	-0.07	SDHC	0.28	0.06	0.04	-0.08	0.521412	0.181495	0.141247	-0.0208221
TTTTCCTCTAAATTGCCGAATAAT	TRCN0000468155	10.99	0.23	0.04	0.04	0.06	0.19	0.1	0.23	0.06	SORD	0.13	0.05	0.15	0.15	0.371412	0.171495	0.251247	0.209178
ATTTCTAATATTTTCAAATGAGAT	TRCN0000468113	13.23	0.02	0	0.04	0.09	0.08	0.07	0.09	0.09	C1orf50	0.01	0.06	0.07	0.09	0.251412	0.181495	0.171247	0.149178
ATCCGTGTTTTGCTAGACCATCTC	TRCN0000489110	13.17	0	0	-0.07	-0.06	-0.08	-0.1	-0.06	-0.04	CRHR1	0	-0.07	-0.09	-0.05	0.241412	0.0514947	0.0112469	0.00917791
AATCCCTTTGGTATAAACTTCACA	TRCN0000466650	9.59	-0.05	-0.05	0.14	0.13	0.18	0.1	0.08	0.07	RAB32	-0.05	0.14	0.14	0.08	0.191412	0.261495	0.241247	0.139178
ATCGATACCACTCCTTATAGAACA	TRCN0000489273	10.08	-0.37	-0.45	-0.1	-0.11	-0.08	-0.13	-0.01	-0.04	NR2E1	-0.41	-0.11	-0.11	-0.03	-0.168588	0.0114947	-0.00875307	0.0291779
TGCATCTCTAGGCTAAAAGATTTC	TRCN0000469628	11.63	0.19	0.34	0.17	0.03	0.1	0.07	-0.05	-0.04	DIO1	0.27	0.1	0.08	-0.04	0.511412	0.221495	0.181247	0.0191779
AATAAAAGCTATTTCATATTATAG	TRCN0000468811	11.31	0.26	0.26	0.09	0.01	0.15	0.15	0.1	0.09	ZADH2	0.26	0.05	0.15	0.09	0.501412	0.171495	0.251247	0.149178
ACCAAGTCCCGGTGCTTCGATAGA	TRCN0000477494	12.72	0.23	0.22	0.06	0	0.03	-0.02	-0.04	0.02	AP5S1	0.22	0.03	0	-0.01	0.461412	0.151495	0.101247	0.0491779
CGTGGCACTCAGACCCTCCTAATC	TRCN0000470452	8.04	0.28	-0.2	-0.09	-0.59	-0.04	-0.04	-0.6	-0.63	TMCC1	0.04	-0.34	-0.04	-0.62	0.281412	-0.218505	0.0612469	-0.560822
CAGCTACTTTAACGGTATTCTCAA	TRCN0000469116	13.06	0.11	0.11	0.02	0.03	0.07	0.01	0.03	0.02	EIF2B1	0.11	0.03	0.04	0.02	0.351412	0.151495	0.141247	0.0791779
TCCCAGAAATACCACCCCCGTACA	TRCN0000465615	7.74	0.04	-0.14	-0.12	-0.14	-0.24	-0.21	0.03	-0.37	SPATA2	-0.05	-0.13	-0.23	-0.17	0.191412	-0.00850534	-0.128753	-0.110822
TAATCCAACAACTTTAAAATGGTT	TRCN0000473760	9.2	-0.46	-0.49	-0.13	-0.07	-0.05	0.14	0.22	0.09	USP36	-0.48	-0.1	0.04	0.16	-0.238588	0.0214947	0.141247	0.219178
CCATTTAGCGATTAAATAACAGAA	TRCN0000472199	11.55	0.19	0.43	0.09	0.09	0.15	0.13	-0.01	0	C16orf74	0.31	0.09	0.14	0	0.551412	0.211495	0.241247	0.0591779
TAGAGACAACCATCTCAGATCACA	TRCN0000472451	11.51	0.16	0.27	0.03	0.02	0.01	0.04	-0.03	0.03	ANAPC13	0.21	0.02	0.03	0	0.451412	0.141495	0.131247	0.0591779
TTGACCCCGGGGACCAGCTCTATA	TRCN0000489280	13.55	0.06	0.04	0.11	0.11	0.11	0.08	0.07	0.1	P2RY4	0.05	0.11	0.09	0.09	0.291412	0.231495	0.191247	0.149178
ATTTCAAGTCCCCTCAGAGTCCCG	TRCN0000476447	9.77	0.52	0.58	0.4	0.28	0.33	0.34	0.26	0.11	SRSF3	0.55	0.34	0.34	0.18	0.791412	0.461495	0.441247	0.239178
TGTTACAGCTCGACCGTCGACATC	TRCN0000466160	10.55	0.11	0.24	-0.09	-0.05	-0.04	-0.02	-0.05	0.03	NPPB	0.17	-0.07	-0.03	-0.01	0.411412	0.0514947	0.0712469	0.0491779
AGTCTACTCTTGAGGACTGGTTCA	TRCN0000489456	12.9	0.16	0.11	0.05	0.05	0	0.01	0.02	-0.03	IDO1	0.13	0.05	0.01	-0.01	0.371412	0.171495	0.111247	0.0491779
CTCCGTCGGAACGATTCTATAAGT	TRCN0000488143	9.69	-0.16	-0.28	-0.11	-0.3	-0.23	-0.07	-0.17	-0.21	MRGPRD	-0.22	-0.2	-0.15	-0.19	0.0214123	-0.0785053	-0.0487531	-0.130822
TAACTTCCTAACAATCTACTAAAC	TRCN0000471194	10.27	-0.65	-0.76	-0.12	-0.19	-0.32	-0.02	-0.11	-0.02	PRDM14	-0.71	-0.15	-0.17	-0.06	-0.468588	-0.0285053	-0.0687531	-0.000822094
GGTTCTGTGACTTCCATAACCATG	TRCN0000474179	11.06	0.21	0.22	0.09	0.08	0.19	0.11	0.07	0	DUT	0.21	0.09	0.15	0.04	0.451412	0.211495	0.251247	0.0991779
AATATTCTTTATACGACCAGCCAT	TRCN0000469685	9.66	0.01	0.09	0.04	0.09	0.14	0.18	0.2	-0.03	STX8	0.05	0.07	0.16	0.08	0.291412	0.191495	0.261247	0.139178
CAGGTTAATTCGACCTGCAGCTCA	TRCN0000489947	13.67	0.08	0.05	-0.03	-0.06	-0.1	-0.11	-0.06	-0.08	GHRHR	0.06	-0.04	-0.1	-0.07	0.301412	0.0814947	0.00124693	-0.0108221
GCGACGAGCCATTATAAGCTGCCG	TRCN0000475376	11.45	0.26	0.3	0.03	0.04	0.08	0.09	-0.01	0	CCDC115	0.28	0.03	0.09	0	0.521412	0.151495	0.191247	0.0591779
TCGCCTCAGAACCATATACACTTA	TRCN0000477316	12.78	-0.14	-0.14	-0.16	-0.12	-0.11	-0.15	-0.18	-0.14	PRSS57	-0.14	-0.14	-0.13	-0.16	0.101412	-0.0185053	-0.0287531	-0.100822
ATTTAAACGTCCCCCTTCCGGCAG	TRCN0000481563	9.84	0.61	0.54	0.27	0.11	0.25	0.02	0.33	0.07	GPR52	0.58	0.19	0.13	0.2	0.821412	0.311495	0.231247	0.259178
TAGTCACACCGGACTTTGACTTGT	TRCN0000474061	11.94	0.08	0.21	0.04	0.01	0.04	0.04	-0.06	-0.06	IFT22	0.14	0.02	0.04	-0.06	0.381412	0.141495	0.141247	-0.000822094
CCCGAATCATCCACCCTCTATTTT	TRCN0000467590	10.83	0	0.17	-0.03	0.06	-0.17	0.01	-0.13	-0.03	GAST	0.09	0.01	-0.08	-0.08	0.331412	0.131495	0.0212469	-0.0208221
TTTTTTTAATATGCCATAACCCTT	TRCN0000466205	10.74	0.1	0	0.08	0.15	0.2	0.09	0.23	0.1	PLSCR4	0.05	0.12	0.15	0.16	0.291412	0.241495	0.251247	0.219178
AATACACATTTATATTTATTTTAA	TRCN0000488087	9.79	-0.18	-0.16	-0.12	-0.12	0.08	0.04	0.02	-0.06	PNLIP	-0.17	-0.12	0.06	-0.02	0.0714123	0.00149466	0.161247	0.0391779
CGTCGACTTCACATCGCGCGATCT	TRCN0000477155	10.29	-0.05	-0.28	-0.22	-0.11	-0.17	-0.19	-0.15	-0.19	FMO4	-0.17	-0.16	-0.18	-0.17	0.0714123	-0.0385053	-0.0787531	-0.110822
AACTGTACCTCATTTCGTGGTGGA	TRCN0000478056	11.41	-0.58	-0.95	-0.36	-0.4	-0.36	-0.26	-0.28	-0.3	IRX6	-0.77	-0.38	-0.31	-0.29	-0.528588	-0.258505	-0.208753	-0.230822
CTGACATGCAGATAACTTGGTTAC	TRCN0000481388	9.23	0.33	0.35	0.23	-0.03	0.35	0.03	-0.04	-0.03	VAMP4	0.34	0.1	0.19	-0.03	0.581412	0.221495	0.291247	0.0291779
GGACATTACCCTCCATACGACGTA	TRCN0000489706	12.96	0.17	0.2	0.09	-0.02	0.02	0.02	0.02	0.01	OR14C36	0.18	0.03	0.02	0.01	0.421412	0.151495	0.121247	0.0691779
TCACTGTACAGTACAGTCAGCCCA	TRCN0000474562	9.46	0.22	0.13	-0.08	0.04	-0.09	-0.03	-0.03	-0.1	ANKS1B	0.17	-0.02	-0.06	-0.06	0.411412	0.101495	0.0412469	-0.000822094
ATTGAATTAGGCTGATTTGACTCT	TRCN0000467165	10.65	0.06	0.07	0.08	0.03	0.04	0.02	0.03	0.03	C20orf141	0.06	0.06	0.03	0.03	0.301412	0.181495	0.131247	0.0891779
GCGGCTAGGGGATGTCATTGTAAA	TRCN0000488871	11.29	0.11	0.2	0.04	0.04	-0.05	-0.06	0.1	0.06	OPN1SW	0.15	0.04	-0.05	0.08	0.391412	0.161495	0.0512469	0.139178
CTTCGACCTAATGCCCACCGAGAT	TRCN0000478359	11.28	0.06	0.03	-0.07	-0.04	-0.09	-0.06	-0.08	-0.11	NSG1	0.05	-0.05	-0.07	-0.1	0.291412	0.0714947	0.0312469	-0.0408221
TTTAAGAATTCTATTTCCAAAATG	TRCN0000467387	11.24	-0.06	-0.13	-0.05	-0.04	-0.02	0.1	0.01	-0.03	RNF125	-0.09	-0.04	0.04	-0.01	0.151412	0.0814947	0.141247	0.0491779
TCGTGGCATCAAGGAAGATTCACG	TRCN0000475880	10.72	-0.77	-0.7	-0.21	-0.22	-0.16	-0.03	-0.1	-0.07	CELF3	-0.74	-0.22	-0.09	-0.08	-0.498588	-0.0985053	0.0112469	-0.0208221
ATTATGAATCCCTAAAAGGTGACA	TRCN0000465252	10.11	0.13	0.23	0.16	0.12	0.25	0.16	0.13	0.17	TMED5	0.18	0.14	0.2	0.15	0.421412	0.261495	0.301247	0.209178
CCGCGGTTGTAGGTACATGACAAT	TRCN0000465951	11.06	0.09	0.17	-0.02	-0.11	-0.1	-0.08	-0.16	-0.11	PCGF1	0.13	-0.07	-0.09	-0.13	0.371412	0.0514947	0.0112469	-0.0708221
ATTCAGGCAAATGCCAGCTAATAA	TRCN0000472748	9.91	0.09	0.14	0.07	-0.04	0.22	0.03	0.02	-0.16	NUSAP1	0.12	0.01	0.12	-0.07	0.361412	0.131495	0.221247	-0.0108221
GTAAAGATAGGACGGCTTGTGCTG	TRCN0000471175	10.71	0.08	0.01	0.23	0.23	0.11	0.06	0.11	0.16	ELAVL2	0.05	0.23	0.08	0.13	0.291412	0.351495	0.181247	0.189178
GTTTTACCACTTATGAAAATCCGA	TRCN0000470140	11.69	-0.03	-0.07	0.02	0.04	0.01	0.07	0.08	0.02	MED21	-0.05	0.03	0.04	0.05	0.191412	0.151495	0.141247	0.109178
ATCGTACTTTTTCCCCTATTTAAA	TRCN0000479060	12.1	-0.07	-0.09	0.01	-0.07	-0.03	-0.01	-0.03	0.01	TCEAL8	-0.08	-0.03	-0.02	-0.01	0.161412	0.0914947	0.0812469	0.0491779
AATTTGATTGTTCTTGGCAAGCCC	TRCN0000489769	10.39	-0.11	-0.06	-0.09	-0.16	-0.12	-0.04	-0.04	-0.09	CXCR5	-0.09	-0.13	-0.08	-0.07	0.151412	-0.00850534	0.0212469	-0.0108221
CACATTATCTCTATAAGATCCTGA	TRCN0000478470	11.7	0.19	0.31	0.14	0.13	0.13	0.09	0.02	0.06	RPS28	0.25	0.14	0.11	0.04	0.491412	0.261495	0.211247	0.0991779
AATGTGCTTGCAATTCCCTGCTGT	TRCN0000489359	13.38	0.11	0.04	0.13	0.09	0.11	0.1	0.17	0.12	HRH1	0.07	0.11	0.11	0.14	0.311412	0.231495	0.211247	0.199178
TTTTACTTTGTTGACTACGCTTGA	TRCN0000472820	10.38	-0.1	-0.11	-0.17	-0.11	-0.07	-0.04	-0.04	0.01	ARL6IP6	-0.11	-0.14	-0.05	-0.01	0.131412	-0.0185053	0.0512469	0.0491779
TGTTGAATCGGTAACGATGACCTG	TRCN0000475598	11.08	-0.23	-0.39	0.06	0.04	0.18	0.09	0.05	0.15	CDX4	-0.31	0.05	0.13	0.1	-0.0685877	0.171495	0.231247	0.159178
CATCATACTGCGAACTCACATAAT	TRCN0000489925	9.93	0.49	0.51	0.4	0.4	0.29	0.24	0.34	0.26	PTGFR	0.5	0.4	0.26	0.3	0.741412	0.521495	0.361247	0.359178
TGTATACAGTGCAGACGAGCGACC	TRCN0000470429	10.59	0.21	0.18	0.04	0.01	0.02	-0.08	-0.07	0.16	SCNM1	0.19	0.03	-0.03	0.04	0.431412	0.151495	0.0712469	0.0991779
CTGAACCATATCAAATCTGTTGTC	TRCN0000477761	13.17	-0.06	-0.06	-0.05	-0.08	-0.1	-0.12	-0.07	-0.12	KRT40	-0.06	-0.06	-0.11	-0.1	0.181412	0.0614947	-0.00875307	-0.0408221
AATCTTAATGATTTTACGCACATA	TRCN0000469325	9.66	0.01	-0.15	-0.12	0.05	-0.08	0.02	0.03	-0.04	C17orf62	-0.07	-0.04	-0.03	0	0.171412	0.0814947	0.0712469	0.0591779
TAGCAAGCAGGAAAACACGAAGGC	TRCN0000470617	11.28	0.03	-0.16	-0.12	-0.1	-0.19	-0.11	-0.19	-0.1	SLC7A8	-0.07	-0.11	-0.15	-0.14	0.171412	0.0114947	-0.0487531	-0.0808221
CATGCTTGGAATCGAGGCCTGATA	TRCN0000469917	13.35	0.07	0.04	0.03	0	-0.01	0	-0.01	-0.03	XLOC_005712	0.06	0.02	-0.01	-0.02	0.301412	0.141495	0.0912469	0.0391779
AAATATGCGGCTCTGATAAGTTGT	TRCN0000477808	13.63	0.02	0.07	0.06	0.06	0.07	0.07	0.1	0.06	NO_MATCH_1	0.05	0.06	0.07	0.08	0.291412	0.181495	0.171247	0.139178
AATTTAAAATGATCCCAGGCATCA	TRCN0000472482	10.29	0.03	-0.19	-0.03	0.01	0	0.02	0.13	0.07	HMBOX1	-0.08	-0.01	0.01	0.1	0.161412	0.111495	0.111247	0.159178
AAGTAAGTGTTAATCTAGTACCCT	TRCN0000476429	13.65	-0.1	-0.15	-0.21	-0.17	-0.12	-0.11	-0.11	-0.13	TMEM129	-0.13	-0.19	-0.12	-0.12	0.111412	-0.0685053	-0.0187531	-0.0608221
ATAGTCTATCCTTAACTCTGTCAC	TRCN0000466832	11.17	-0.3	-0.35	-0.28	-0.24	-0.21	-0.08	-0.15	-0.24	SELENBP1	-0.32	-0.26	-0.14	-0.19	-0.0785877	-0.138505	-0.0387531	-0.130822
GTAGGTGCAAACGCGAGACAGACC	TRCN0000488234	10.18	0.42	0.36	0.61	0.31	0.35	0.28	0.47	0.56	MAS1	0.39	0.46	0.32	0.51	0.631412	0.581495	0.421247	0.569178
AAATCTATTAATGAACCATTCCTC	TRCN0000467786	10.2	-0.1	-0.24	-0.09	-0.13	-0.1	-0.08	-0.03	-0.14	FTSJ1	-0.17	-0.11	-0.09	-0.09	0.0714123	0.0114947	0.0112469	-0.0308221
CTCAGGTTCATGAAGTTACTCGTT	TRCN0000466913	13.47	-0.31	-0.27	0.04	0.04	0.06	0.11	-0.04	0.06	RBFOX1	-0.29	0.04	0.09	0.01	-0.0485877	0.161495	0.191247	0.0691779
AATTGGCTATTAGTACGTGATGGT	TRCN0000488397	11.74	0.05	0.03	-0.04	-0.08	-0.03	0.01	0	-0.03	CYB5A	0.04	-0.06	-0.01	-0.01	0.281412	0.0614947	0.0912469	0.0491779
GCTCAGTGAACATTGTAACGCCGC	TRCN0000489942	10.73	0.06	0.19	0.2	0.14	0.08	0.03	0.03	0.15	HHEX	0.12	0.17	0.06	0.09	0.361412	0.291495	0.161247	0.149178
CCAATAACTATTTATTTGAATGAT	TRCN0000488675	12.44	0.11	0.05	-0.08	-0.14	-0.06	-0.12	-0.01	-0.07	FSHR	0.08	-0.11	-0.09	-0.04	0.321412	0.0114947	0.0112469	0.0191779
CCTGAATGTTCTTAAATATCAGAC	TRCN0000488966	11.99	0.02	0	0.02	0.04	-0.09	0.02	-0.04	0	ADK	0.01	0.03	-0.04	-0.02	0.251412	0.151495	0.0612469	0.0391779
GCATTAGTCACCGACGTAGTGGCC	TRCN0000476278	13.2	-0.03	-0.25	-0.16	-0.15	-0.15	-0.15	-0.05	-0.04	STS	-0.14	-0.16	-0.15	-0.05	0.101412	-0.0385053	-0.0487531	0.00917791
GAAGAACTCCCCTATATTCGCACA	TRCN0000479337	10.75	-0.38	-0.34	-0.22	-0.1	-0.19	-0.19	-0.13	-0.05	SPPL2C	-0.36	-0.16	-0.19	-0.09	-0.118588	-0.0385053	-0.0887531	-0.0308221
GCATGGCCAGGCAATCCAATATCG	TRCN0000474925	12.62	-0.55	-0.53	0.21	0.14	0.13	0.13	0.21	0.16	LCOR	-0.54	0.17	0.13	0.18	-0.298588	0.291495	0.231247	0.239178
ATGATTAATCTAATGAATATATAT	TRCN0000471409	10.87	0.08	0.01	0.06	0.14	0.12	0.09	0.15	0.1	ISG20	0.05	0.1	0.11	0.12	0.291412	0.221495	0.211247	0.179178
CACTTCATGTCTTTCTTATAAGGT	TRCN0000488276	10.51	0	0	-0.12	-0.12	-0.06	-0.08	-0.02	-0.16	GPR141	0	-0.12	-0.07	-0.09	0.241412	0.00149466	0.0312469	-0.0308221
GGCACACCGTGGTACATCTTCAGG	TRCN0000477017	13.81	-0.06	-0.14	-0.11	-0.12	-0.14	-0.12	-0.17	-0.19	RGL1	-0.1	-0.12	-0.13	-0.18	0.141412	0.00149466	-0.0287531	-0.120822
TAAGCGGTCAACCACGCGGAAGTT	TRCN0000480269	11.44	-0.01	-0.23	-0.03	-0.04	-0.15	-0.03	-0.18	-0.17	ZRSR2	-0.12	-0.03	-0.09	-0.17	0.121412	0.0914947	0.0112469	-0.110822
TGCTATCACCACCGTACAGGTCCC	BRDN0000559463	10.48	-0.23	-0.1	-0.09	-0.21	-0.13	-0.07	-0.24	-0.2	HcRed	-0.17	-0.15	-0.1	-0.22	0.0714123	-0.0285053	0.00124693	-0.160822
TTTTCCCAACGATACACAACACTC	TRCN0000477560	9.54	-0.13	-0.42	-0.17	-0.21	-0.18	-0.09	-0.08	-0.19	TPRN	-0.27	-0.19	-0.13	-0.13	-0.0285877	-0.0685053	-0.0287531	-0.0708221
ACAAGATATTAACGCTCGGCTGGA	TRCN0000479301	10.86	-0.27	-0.24	-0.26	-0.22	-0.24	-0.09	-0.03	-0.17	FAM234B	-0.26	-0.24	-0.17	-0.1	-0.0185877	-0.118505	-0.0687531	-0.0408221
ATTTTGTCCTCTTTTTATGTTTTA	TRCN0000472986	10.13	-0.19	-0.26	-0.12	-0.22	-0.16	-0.04	-0.06	-0.02	NDUFB11	-0.23	-0.17	-0.1	-0.04	0.0114123	-0.0485053	0.00124693	0.0191779
CACACATTTATCAATTGGGTTTGA	TRCN0000487904	11.58	-0.38	-0.46	-0.16	-0.1	-0.12	-0.06	-0.15	-0.07	GPR137B	-0.42	-0.13	-0.09	-0.11	-0.178588	-0.00850534	0.0112469	-0.0508221
TTTCAGTTGACAGCGAGCCCCGTC	TRCN0000467736	12.41	-0.55	-0.72	-0.28	-0.24	-0.27	-0.09	-0.13	-0.19	MCL1	-0.63	-0.26	-0.18	-0.16	-0.388588	-0.138505	-0.0787531	-0.100822
CTCAGGCAAGTTTACGCTTGATTT	TRCN0000465705	10.26	-0.22	-0.2	-0.15	-0.06	-0.18	-0.17	-0.13	-0.15	LHFPL5	-0.21	-0.11	-0.18	-0.14	0.0314123	0.0114947	-0.0787531	-0.0808221
AAGTTTTCGTATTTGATCATCATC	TRCN0000475112	9.3	-0.16	-0.36	0.02	0.03	0.07	-0.04	0.1	-0.03	CNOT7	-0.26	0.03	0.01	0.04	-0.0185877	0.151495	0.111247	0.0991779
ATCCCTGTTCAGGCCCTCTGTGGC	TRCN0000469916	12.56	-0.21	-0.35	-0.27	-0.3	-0.16	-0.15	-0.11	-0.17	PPM1G	-0.28	-0.28	-0.16	-0.14	-0.0385877	-0.158505	-0.0587531	-0.0808221
TAGAGATTGGGTTCAACCTGGAAG	BRDN0000559460	10.95	0.05	-0.06	-0.11	-0.11	-0.04	0.02	-0.2	-0.14	BFP	-0.01	-0.11	-0.01	-0.17	0.231412	0.0114947	0.0912469	-0.110822
GTTATTTAATCTTCACTGGGCATT	TRCN0000478756	8.77	-0.63	-0.78	-0.15	-0.3	-0.18	0.05	-0.23	-0.2	KATNAL1	-0.7	-0.23	-0.06	-0.21	-0.458588	-0.108505	0.0412469	-0.150822
AGGAATATTCAGCGTTATCGATTG	TRCN0000477890	9.48	0.26	0.1	0.16	0.07	0.15	-0.05	0.13	0.17	RHOXF2	0.18	0.12	0.05	0.15	0.421412	0.241495	0.151247	0.209178
AACCACCCTAACTTCCAACATAGA	TRCN0000488338	9.76	0.07	-0.12	-0.1	-0.15	-0.17	0.03	-0.14	-0.2	ADRB2	-0.02	-0.13	-0.07	-0.17	0.221412	-0.00850534	0.0312469	-0.110822
AATTAAAATTAATTTAAACTCCAT	TRCN0000471388	9.91	0	-0.29	-0.07	-0.02	-0.05	0	0.01	0.02	BCL2L14	-0.14	-0.05	-0.02	0.01	0.101412	0.0714947	0.0812469	0.0691779
AATCTCTAACTGCCTTATGGTTAG	TRCN0000467418	11.67	-0.43	-0.46	-0.28	-0.27	-0.24	-0.17	-0.2	-0.2	ZSCAN2	-0.44	-0.27	-0.21	-0.2	-0.198588	-0.148505	-0.108753	-0.140822
ATGCTTGCTGGTTTATCGGAATTG	TRCN0000492142	10.87	-0.35	-0.61	-0.22	-0.19	-0.09	-0.12	-0.11	-0.17	GPR137B	-0.48	-0.21	-0.1	-0.14	-0.238588	-0.0885053	0.00124693	-0.0808221
AATAATATCATATCAACGCCATTC	TRCN0000487975	10.61	-0.46	-0.43	-0.29	-0.27	-0.3	-0.08	-0.2	-0.08	TFE3	-0.45	-0.28	-0.19	-0.14	-0.208588	-0.158505	-0.0887531	-0.0808221
ACCAGTCTCTATTACCGGTCTAAT	TRCN0000489156	10.44	-0.03	-0.07	-0.13	-0.05	0.04	-0.11	0.06	-0.05	NME5	-0.05	-0.09	-0.04	0.01	0.191412	0.0314947	0.0612469	0.0691779
GACGCACCACACCATATTGAGGCA	TRCN0000467571	10.88	-0.04	-0.06	0.02	0.02	-0.06	-0.06	-0.25	0	PTH	-0.05	0.02	-0.06	-0.12	0.191412	0.141495	0.0412469	-0.0608221
ACAACGCGCGAACCACAGAAGTGT	TRCN0000478472	11.02	-0.02	-0.1	-0.04	-0.11	-0.03	-0.04	-0.09	-0.07	SNRNP25	-0.06	-0.08	-0.04	-0.08	0.181412	0.0414947	0.0612469	-0.0208221
AAAAATATTTTTAAAAACTGTATT	TRCN0000480202	10.15	-0.52	-0.52	-0.36	-0.12	-0.37	-0.11	-0.05	-0.05	SLC8B1	-0.52	-0.24	-0.24	-0.05	-0.278588	-0.118505	-0.138753	0.00917791
CATGCCTACTCTTAACTAACACAA	TRCN0000471306	9.41	-0.24	-0.23	0.07	0.13	-0.05	0.08	-0.07	-0.24	MRPL13	-0.23	0.1	0.01	-0.16	0.0114123	0.221495	0.111247	-0.100822
ACTGGGCTGGGAAATTGCTTCGAA	TRCN0000473758	10.15	-0.29	-0.18	-0.13	-0.02	-0.09	-0.07	-0.08	-0.03	NSUN7	-0.24	-0.07	-0.08	-0.06	0.00141227	0.0514947	0.0212469	-0.000822094
CTGTTCTCAGCTTGAACAGATATT	TRCN0000466646	10.71	-1.32	-1.16	-0.38	-0.33	-0.46	-0.36	-0.28	-0.23	ZNF513	-1.24	-0.35	-0.41	-0.26	-0.998588	-0.228505	-0.308753	-0.200822
ATTTTATTCAAGTGATTGCGGGAT	TRCN0000481577	10.63	-0.38	-0.48	-0.15	-0.12	-0.14	-0.17	0	-0.1	RNF34	-0.43	-0.14	-0.16	-0.05	-0.188588	-0.0185053	-0.0587531	0.00917791
AATGGGAAATGACATTGAAAATTA	TRCN0000467081	10.81	-0.28	-0.28	-0.18	-0.17	-0.17	-0.05	-0.15	-0.02	RAB3A	-0.28	-0.18	-0.11	-0.09	-0.0385877	-0.0585053	-0.00875307	-0.0308221
AAAGATATTTGATCCCACCCCATA	TRCN0000478294	10.58	-0.25	-0.36	-0.14	-0.07	-0.01	-0.04	-0.05	-0.1	RAB31	-0.3	-0.11	-0.03	-0.07	-0.0585877	0.0114947	0.0712469	-0.0108221
CTCTTCCACAATTAAGATATCTAA	TRCN0000476921	11.1	-0.39	-0.56	-0.36	-0.27	-0.22	-0.18	-0.16	-0.19	SBSPON	-0.47	-0.31	-0.2	-0.18	-0.228588	-0.188505	-0.0987531	-0.120822
AGATTAGTCTCTCAATTGTTTGCC	TRCN0000475973	11.32	-0.06	0.17	0.44	0.32	0.26	0.17	0.23	0.24	GPR139	0.06	0.38	0.21	0.24	0.301412	0.501495	0.311247	0.299178
AGATACCGAAATCTCCTACCTTCA	TRCN0000479594	10.04	-0.05	0	-0.09	0.07	0.24	-0.18	-0.09	-0.05	TMEM171	-0.02	-0.01	0.03	-0.07	0.221412	0.111495	0.131247	-0.0108221
ATTCAGTTTAGTATGTAATCATAT	TRCN0000480394	10.48	-0.3	-0.47	-0.11	-0.18	-0.17	-0.05	-0.08	-0.19	RDM1	-0.38	-0.14	-0.11	-0.14	-0.138588	-0.0185053	-0.00875307	-0.0808221
AATTAGGGTTCATCTAGTTGCCCC	TRCN0000479333	8.92	-0.17	-0.96	-0.24	-0.15	-0.02	-0.15	-0.16	-0.14	NFE2L3	-0.57	-0.2	-0.09	-0.15	-0.328588	-0.0785053	0.0112469	-0.0908221
TCCATAAACAGCCGTATAATACCA	TRCN0000470909	13.79	-0.22	-0.22	-0.19	-0.16	-0.1	-0.15	-0.18	-0.16	H2AFV	-0.22	-0.17	-0.12	-0.17	0.0214123	-0.0485053	-0.0187531	-0.110822
AGATCCGACTTGATGAAACCATGC	TRCN0000469157	12.04	-0.21	-0.11	-0.16	-0.08	-0.21	-0.11	-0.22	-0.15	TMEM239	-0.16	-0.12	-0.16	-0.18	0.0814123	0.00149466	-0.0587531	-0.120822
AAATTTCCCTTGACGTACATGCCT	TRCN0000476251	9.05	-0.71	-1.11	-0.38	-0.2	-0.44	-0.4	-0.17	-0.12	FKBP9	-0.91	-0.29	-0.42	-0.15	-0.668588	-0.168505	-0.318753	-0.0908221
AATTCTCGAGTCCTTGTCACCTCT	TRCN0000474949	10.19	-0.35	-0.39	-0.23	-0.21	-0.27	-0.19	-0.02	-0.13	NAA30	-0.37	-0.22	-0.23	-0.07	-0.128588	-0.0985053	-0.128753	-0.0108221
TGCATTTGCAAACCTTTGACACTC	TRCN0000475419	5.33	-0.76	-0.08	-0.18	0.12	-0.27	0.24	-0.46	0.47	KIF26B	-0.42	-0.03	-0.01	0.01	-0.178588	0.0914947	0.0912469	0.0691779
TTCACACCGTTTACACATAAATGC	TRCN0000489839	10.46	-0.39	-0.47	-0.17	-0.18	-0.36	-0.19	-0.22	-0.24	SLC22A4	-0.43	-0.17	-0.27	-0.23	-0.188588	-0.0485053	-0.168753	-0.170822
ACCTATTACAAAGACCAGTAGCTT	TRCN0000467184	10.95	-0.47	-0.4	-0.27	-0.28	-0.3	-0.32	-0.25	-0.22	ADORA2A	-0.43	-0.27	-0.31	-0.23	-0.188588	-0.148505	-0.208753	-0.170822
TAAATTGCGTAAATAACATGGGTG	TRCN0000491939	7.41	-0.87	-1.92	-0.32	-0.67	-0.27	-0.42	-1.16	-0.35	KIT	-1.39	-0.5	-0.35	-0.76	-1.14859	-0.378505	-0.248753	-0.700822
AAATTGTTGTTGTCACATGCCGTA	TRCN0000473699	10.9	-0.21	-0.18	-0.19	-0.12	-0.05	-0.07	0	0.04	HIST1H4H	-0.2	-0.15	-0.06	0.02	0.0414123	-0.0285053	0.0412469	0.0791779
CCTGCGAGCTCTCCATCCGATTCC	TRCN0000489001	11.18	-0.15	0.11	0.13	0	0.05	-0.01	-0.13	0.01	P2RY6	-0.02	0.07	0.02	-0.06	0.221412	0.191495	0.121247	-0.000822094
TACCCCGAACATCAAACAACACCA	TRCN0000489536	11.01	-0.15	-0.03	-0.05	-0.02	-0.08	-0.06	0.02	0.01	P2RY6	-0.09	-0.04	-0.07	0.01	0.151412	0.0814947	0.0312469	0.0691779
GTTTCGTATCGCCGAATCCCTTGT	TRCN0000475749	9.72	-1.09	-1.31	-0.54	-0.4	-0.6	-0.36	-0.34	-0.42	LMX1B	-1.2	-0.47	-0.48	-0.38	-0.958588	-0.348505	-0.378753	-0.320822
GTCAGCGAGGTTGTTATTGGTCTA	TRCN0000479102	8.58	-1.4	-1.19	-0.56	-0.06	-0.23	0.22	-0.21	0	PLAC1	-1.29	-0.31	-0.01	-0.11	-1.04859	-0.188505	0.0912469	-0.0508221
TTCTAATTTCTGACTATTCGACAA	TRCN0000492299	10.52	-0.75	-0.86	-0.45	-0.21	-0.41	-0.17	-0.16	-0.18	SLC7A8	-0.8	-0.33	-0.29	-0.17	-0.558588	-0.208505	-0.188753	-0.110822
ACCTTGACTCCTCTATATGGAAAT	TRCN0000473127	10.42	-0.45	-0.43	-0.34	-0.23	-0.29	-0.28	-0.16	-0.27	GLRA3	-0.44	-0.29	-0.29	-0.21	-0.198588	-0.168505	-0.188753	-0.150822
TATTACCGGAGGTAACACAACTTT	TRCN0000475659	12.11	-0.72	-0.8	-0.23	-0.17	-0.24	-0.24	-0.14	-0.16	ZNF645	-0.76	-0.2	-0.24	-0.15	-0.518588	-0.0785053	-0.138753	-0.0908221
CAGCGTCTACCTTTTTTATGACAA	TRCN0000481285	11.49	-0.84	-0.91	-0.33	-0.27	-0.41	-0.25	-0.21	-0.24	ZNF645	-0.88	-0.3	-0.33	-0.23	-0.638588	-0.178505	-0.228753	-0.170822
AACCTCTGCTACATCAAACACCTG	TRCN0000489321	11.24	-0.03	0.02	-0.16	-0.21	-0.22	-0.12	-0.06	-0.19	ADORA2B	-0.01	-0.18	-0.17	-0.12	0.231412	-0.0585053	-0.0687531	-0.0608221
ACGCTTATTTGACACCTTCAGGCG	TRCN0000479268	9.85	-0.49	-0.59	-0.33	-0.18	-0.46	-0.29	-0.25	-0.43	WDR93	-0.54	-0.25	-0.38	-0.34	-0.298588	-0.128505	-0.278753	-0.280822
CCAAGATCCTGGATCATTTGATTA	TRCN0000480766	9.07	-0.81	-0.78	-0.6	-0.24	-0.62	-0.15	-0.34	-0.21	EZH1	-0.79	-0.42	-0.39	-0.27	-0.548588	-0.298505	-0.288753	-0.210822
CAGGCACCACGTCTACAAGCTCCA	TRCN0000472098	13.78	-0.91	-0.95	-0.54	-0.48	-0.56	-0.49	-0.47	-0.49	VMA21	-0.93	-0.51	-0.52	-0.48	-0.688588	-0.388505	-0.418753	-0.420822
TAAGTCAAACTCAGAGCCATCCTG	TRCN0000479421	12.41	-0.24	0	-0.02	-0.03	-0.13	-0.03	-0.12	-0.03	GPR68	-0.12	-0.03	-0.08	-0.07	0.121412	0.0914947	0.0212469	-0.0108221
TGGACTCGCCTTACACTTGTAGTA	TRCN0000480006	8.11	-0.81	-0.52	-0.52	-0.21	-0.31	-0.38	-0.32	-0.26	MDM1	-0.66	-0.37	-0.34	-0.29	-0.418588	-0.248505	-0.238753	-0.230822
AATGACAATCCACGGTCATACCGC	TRCN0000488083	8.62	-0.43	-0.33	-0.28	-0.24	-0.39	-0.07	-0.1	-0.22	HRH2	-0.38	-0.26	-0.23	-0.16	-0.138588	-0.138505	-0.128753	-0.100822
GACCACGGCGGCAACATTCCAGCA	TRCN0000489751	10.5	-0.23	-0.15	0.29	0.21	0.21	0.09	0.34	0.3	CHRM3	-0.19	0.25	0.15	0.32	0.0514123	0.371495	0.251247	0.379178
AAGCATTTGTCTGCCTTACTAACC	TRCN0000489784	11.2	-0.89	-0.91	-0.16	-0.07	-0.08	-0.05	-0.04	-0.02	GHSR	-0.9	-0.12	-0.06	-0.03	-0.658588	0.00149466	0.0412469	0.0291779
AATCCTCTGCAGCCTTCCGTTTTT	TRCN0000489785	10.07	-0.51	-0.43	0.31	0.44	0.26	0.32	0.33	0.35	GPR139	-0.47	0.37	0.29	0.34	-0.228588	0.491495	0.391247	0.399178
TCATGTACGACTTAGTAAATAGAT	TRCN0000488887	11.47	-0.49	-0.57	-0.18	-0.09	0.17	0.15	-0.1	-0.05	SLC10A1	-0.53	-0.14	0.16	-0.07	-0.288588	-0.0185053	0.261247	-0.0108221
TGCGCACGATATTATTTTTACCTT	TRCN0000479768	10.57	-0.8	-0.65	-0.43	-0.39	-0.46	-0.38	-0.2	-0.25	TFEB	-0.73	-0.41	-0.42	-0.22	-0.488588	-0.288505	-0.318753	-0.160822
ATCAACAGCGGTTTGTAGCGACGC	TRCN0000488956	10.81	-0.13	-0.08	-0.25	-0.2	-0.16	-0.19	-0.2	-0.25	GPR3	-0.11	-0.22	-0.17	-0.23	0.131412	-0.0985053	-0.0687531	-0.170822
AAATCCTCGATGAGGCATCCCAAG	TRCN0000491554	9.88	-0.43	-0.66	-0.07	-0.15	-0.18	-0.15	0.04	-0.13	CHRM1	-0.55	-0.11	-0.17	-0.05	-0.308588	0.0114947	-0.0687531	0.00917791
TTATGTTCGGTTACCGACAGAGCT	TRCN0000488691	11.35	-0.58	-0.6	-0.35	-0.31	-0.38	-0.33	-0.23	-0.38	ADORA2A	-0.59	-0.33	-0.36	-0.3	-0.348588	-0.208505	-0.258753	-0.240822
GGGACTATGCGTTACCATTCATCT	TRCN0000468052	11.51	-1.3	-1.31	-0.65	-0.41	-0.56	-0.42	-0.47	-0.45	GPR4	-1.31	-0.53	-0.49	-0.46	-1.06859	-0.408505	-0.388753	-0.400822
GGCGACATTGCGCTGAAATTTATA	TRCN0000476089	10.81	-0.78	-1.17	-0.62	-0.37	-0.52	-0.34	-0.54	-0.23	SLC26A9	-0.98	-0.49	-0.43	-0.38	-0.738588	-0.368505	-0.328753	-0.320822
CGTAATTCACATTTTCAAATGTAG	TRCN0000488901	10.48	-0.54	-0.52	-0.34	-0.24	-0.29	-0.21	-0.35	-0.2	EIF2AK2	-0.53	-0.29	-0.25	-0.27	-0.288588	-0.168505	-0.148753	-0.210822
TGGAAGCCTTTGGACATCCAACAC	TRCN0000487679	9.47	-0.49	-0.3	0.49	0.48	0.3	0.28	0.43	0.47	MRGPRD	-0.39	0.49	0.29	0.45	-0.148588	0.611495	0.391247	0.509178
GCTGTGATTAGGCTTCACAGGATT	TRCN0000473508	10.83	-0.92	-0.97	-0.33	-0.32	-0.25	-0.22	-0.24	-0.24	SOX2	-0.94	-0.33	-0.24	-0.24	-0.698588	-0.208505	-0.138753	-0.180822
GCCAAAGGGTCAGTCTTAGTGCCA	TRCN0000469246	7.08	0.27	-0.13	0.01	-0.38	-0.38	0.03	-0.13	0.18	TPH2	0.07	-0.19	-0.18	0.02	0.311412	-0.0685053	-0.0787531	0.0791779
ACTACGAGTCCGCGGCGGCTTACT	TRCN0000488012	10.18	-0.36	-0.37	0.34	0.46	0.3	0.13	0.3	0.34	MRGPRX4	-0.36	0.4	0.22	0.32	-0.118588	0.521495	0.321247	0.379178
GAAATTCAATCTAGGGCCCATTTG	TRCN0000470107	9.75	-0.73	-1.18	-0.37	-0.39	-0.46	-0.06	-0.02	-0.25	KLF12	-0.95	-0.38	-0.26	-0.14	-0.708588	-0.258505	-0.158753	-0.0808221
GGTGTGACAAATGAAATGGTGGTG	TRCN0000488175	11.17	-0.98	-0.93	-0.12	-0.05	-0.31	-0.03	-0.06	-0.06	GHSR	-0.96	-0.08	-0.17	-0.06	-0.718588	0.0414947	-0.0687531	-0.000822094
CTGTAATCCTACAAACCTTTAATC	TRCN0000465965	9.58	-0.67	-0.76	-0.34	-0.3	-0.31	-0.06	-0.34	-0.25	YTHDC1	-0.71	-0.32	-0.19	-0.3	-0.468588	-0.198505	-0.0887531	-0.240822
AATTTGTACTGATGTGACGGTCAG	TRCN0000477267	8.47	-0.66	-1.09	-0.27	-0.53	-0.13	0.02	-0.23	-0.27	GLRA1	-0.88	-0.4	-0.06	-0.25	-0.638588	-0.278505	0.0412469	-0.190822
TTCCGCCCTGTATTCCGGTACGTC	TRCN0000465893	8.34	-0.99	-1.34	-0.58	-0.81	-0.8	-0.35	-0.6	-0.34	ENTPD2	-1.17	-0.7	-0.58	-0.47	-0.928588	-0.578505	-0.478753	-0.410822
CCCATGCAAAAGTTGGTATATGAC	TRCN0000491707	10.38	-1.3	-1.46	-0.38	-0.34	-0.43	-0.2	-0.51	-0.16	CDX2	-1.38	-0.36	-0.32	-0.34	-1.13859	-0.238505	-0.218753	-0.280822
CGCAGTATATTACCGTCTGAGTGC	TRCN0000473188	11.45	-0.9	-1.09	-0.63	-0.51	-0.67	-0.61	-0.48	-0.47	MAGEB6	-0.99	-0.57	-0.64	-0.47	-0.748588	-0.448505	-0.538753	-0.410822
TTGTCTCACATGCAGCTCAGCCGT	TRCN0000470436	10.76	-1.01	-1.29	-0.52	-0.36	-0.56	-0.37	-0.39	-0.32	H1FNT	-1.15	-0.44	-0.46	-0.35	-0.908588	-0.318505	-0.358753	-0.290822
GTTGAGTAGATATGCCCGAGGGGC	TRCN0000472033	11.16	-0.94	-1.29	-0.56	-0.36	-0.51	-0.32	-0.43	-0.41	TLE1	-1.11	-0.46	-0.42	-0.42	-0.868588	-0.338505	-0.318753	-0.360822
ATCATTGACACGGGTTCCCTAGTT	TRCN0000488647	9.85	-0.14	-0.32	-0.45	-0.23	-0.2	-0.29	-0.22	-0.43	P2RY11	-0.23	-0.34	-0.24	-0.32	0.0114123	-0.218505	-0.138753	-0.260822
CCGTACCAGTACCTTGATGACTGG	TRCN0000489896	8.4	-0.91	-1.8	-0.72	-0.84	-0.91	-0.56	-0.64	-0.69	PLK4	-1.35	-0.78	-0.74	-0.66	-1.10859	-0.658505	-0.638753	-0.600822
CTTACGAAATTTCGTCTAAATGAA	TRCN0000489508	12.16	-0.87	-0.87	-0.09	-0.04	-0.17	-0.11	-0.01	-0.07	CHRM5	-0.87	-0.07	-0.14	-0.04	-0.628588	0.0514947	-0.0387531	0.0191779
GGTATGATACCTGAGACCCTTGGC	TRCN0000487723	11.27	-0.77	-0.47	0.12	0.15	-0.07	-0.01	-0.08	0.11	GPR68	-0.62	0.14	-0.04	0.02	-0.378588	0.261495	0.0612469	0.0791779
CTAATATACAACCGATTAATCATC	BRDN0000559468	8.4	-0.97	-1.66	-0.46	-0.31	-0.66	-0.22	-0.07	-0.32	LUCIFERASE	-1.31	-0.39	-0.44	-0.19	-1.06859	-0.268505	-0.338753	-0.130822
AACTCTCAAGAATATATTCTAGTC	TRCN0000487803	9.75	-1.14	-1.48	-0.09	0.14	0.02	0.14	0.04	0.15	MRGPRX4	-1.31	0.02	0.08	0.1	-1.06859	0.141495	0.181247	0.159178
CTATGATACTTTATCATCGTTCTT	TRCN0000489868	11.14	0	-0.01	-0.61	-0.4	-0.36	-0.26	-0.32	-0.4	AKT2	0	-0.5	-0.31	-0.36	0.241412	-0.378505	-0.208753	-0.300822
ACAAGTGTAGACGTAAATCTCAAT	TRCN0000465298	10.69	-1.23	-1.18	-0.78	-0.42	-0.59	-0.43	-0.45	-0.33	FOXR2	-1.2	-0.6	-0.51	-0.39	-0.958588	-0.478505	-0.408753	-0.330822
GCGTGCTTCATTTGTAATAATTTT	TRCN0000470428	11.92	-1.19	-1.45	-0.66	-0.54	-0.61	-0.38	-0.47	-0.32	LRFN4	-1.32	-0.6	-0.49	-0.39	-1.07859	-0.478505	-0.388753	-0.330822
CAAGAGACGTTTCTCGCTTCGGAA	TRCN0000488923	11.97	-0.09	0.17	-0.52	-0.35	-0.1	-0.14	-0.45	-0.23	AKT1	0.04	-0.43	-0.12	-0.34	0.281412	-0.308505	-0.0187531	-0.280822
TCAACACGTATCACATCGAGACAA	TRCN0000489648	10.35	-0.64	-0.61	-0.58	-0.47	-0.52	-0.37	-0.23	-0.47	PIK3CA	-0.63	-0.53	-0.45	-0.35	-0.388588	-0.408505	-0.348753	-0.290822
TGCGATAGTATCGTCGGGATTCTG	TRCN0000470327	10.02	-1.1	-1.5	-0.66	-0.46	-0.56	-0.38	-0.35	-0.41	DES	-1.3	-0.56	-0.47	-0.38	-1.05859	-0.438505	-0.368753	-0.320822
CGCTTGGTTGGTCGACCAACAGTG	TRCN0000468422	11.25	-1.42	-1.54	-0.69	-0.64	-0.69	-0.47	-0.68	-0.64	IFNB1	-1.48	-0.67	-0.58	-0.66	-1.23859	-0.548505	-0.478753	-0.600822
GCCGGGGATTTGTCAAATAGTCTG	TRCN0000479774	8.87	-0.86	-0.9	-0.59	-0.72	-0.68	-0.52	-0.45	-0.26	HEXIM1	-0.88	-0.65	-0.6	-0.36	-0.638588	-0.528505	-0.498753	-0.300822
CTATAATCCGGTGTCTTCCTGATA	TRCN0000487730	9.42	-0.71	-0.28	-0.84	-0.48	-0.56	-0.23	-0.63	-0.38	PIK3CA	-0.49	-0.66	-0.4	-0.5	-0.248588	-0.538505	-0.298753	-0.440822
CGGTCCGACATGAATCACGGGTCG	TRCN0000465481	10.94	-1.28	-1.34	-0.8	-0.56	-0.71	-0.51	-0.57	-0.52	LOC105372824	-1.31	-0.68	-0.61	-0.55	-1.06859	-0.558505	-0.508753	-0.490822
GGCGACGAAAAACCGGATATGAGT	TRCN0000491649	11.58	-1.42	-1.45	-0.98	-0.67	-0.82	-0.46	-0.52	-0.59	CDK18	-1.43	-0.82	-0.64	-0.55	-1.18859	-0.698505	-0.538753	-0.490822
GCAGAGATGTTATTCGGAGACCGA	TRCN0000468228	10.62	-1.85	-1.83	-1.03	-0.84	-0.87	-0.46	-0.65	-0.39	LOC102724428	-1.84	-0.94	-0.67	-0.52	-1.59859	-0.818505	-0.568753	-0.460822
GTAAGTACACCCCTAATCTCTATT	TRCN0000478431	10.43	-1.3	-1.77	-0.83	-0.58	-0.7	-0.44	-0.3	-0.54	EIF3C	-1.54	-0.71	-0.57	-0.42	-1.29859	-0.588505	-0.468753	-0.360822
CCCGCAGAGACAACAGGGACAGAA	TRCN0000466621	11.23	-1.75	-2.14	-0.87	-0.68	-0.95	-0.57	-0.75	-0.55	FUK	-1.95	-0.77	-0.76	-0.65	-1.70859	-0.648505	-0.658753	-0.590822
CGCTTCAACGAGGCTGAGACCTTG	TRCN0000489962	9.25	0.07	0.59	-0.68	-0.39	-0.42	0	-0.54	-0.43	AKT1	0.33	-0.53	-0.21	-0.49	0.571412	-0.408505	-0.108753	-0.430822
GAAAGCGCCTCCCTATTTAAGAGC	TRCN0000478961	9.74	-0.73	-1.04	-0.71	-0.39	-0.42	-0.3	-0.22	-0.1	RBL1	-0.89	-0.55	-0.36	-0.16	-0.648588	-0.428505	-0.258753	-0.100822
TGAGCCCCTGCAGCTATTTTACCA	TRCN0000470266	10.24	-1.16	-1.77	-0.73	-0.41	-0.72	-0.52	-0.53	-0.5	DGKK	-1.47	-0.57	-0.62	-0.51	-1.22859	-0.448505	-0.518753	-0.450822
CGCACAAGAAGGTCTTGTTCACCG	TRCN0000489129	9.53	-1.73	-2.01	-0.79	-0.53	-0.88	-0.75	-0.6	-0.34	PKN1	-1.87	-0.66	-0.81	-0.47	-1.62859	-0.538505	-0.708753	-0.410822
CTGCCGAGGCGACATTCCTTCCAT	TRCN0000492138	11.04	-1.31	-1.77	-0.83	-0.55	-0.73	-0.55	-0.66	-0.45	LDLR	-1.54	-0.69	-0.64	-0.55	-1.29859	-0.568505	-0.538753	-0.490822
CCGTAGCTAACTGCAGGACGGTTG	TRCN0000479538	9.87	-1.27	-1.72	-0.74	-0.45	-0.85	-0.43	-0.47	-0.37	FAM126A	-1.49	-0.59	-0.64	-0.42	-1.24859	-0.468505	-0.538753	-0.360822
ATCTCTAGAACCGTATCCGAGGAC	TRCN0000489844	6.26	-0.33	-0.87	-0.18	0.41	0.13	0.05	0.32	0.07	CHRM3	-0.6	0.12	0.09	0.19	-0.358588	0.241495	0.191247	0.249178
ACTTGGATTACCTTAAGGATGCAC	TRCN0000478423	9.37	-2.1	-2.65	-1.16	-0.87	-1.02	-0.42	-0.6	-0.71	EXOC3L4	-2.38	-1.02	-0.72	-0.65	-2.13859	-0.898505	-0.618753	-0.590822
TTAGTATTCACTACGCCGAACGAT	TRCN0000488878	11.63	-1.59	-1.82	-0.57	-0.28	-0.45	-0.26	-0.22	-0.26	BRS3	-1.7	-0.43	-0.35	-0.24	-1.45859	-0.308505	-0.248753	-0.180822
CGAGTCAGGCCAAGCGTAAAACTA	TRCN0000479184	10.79	-1.78	-2.46	-0.99	-0.86	-1.01	-0.63	-0.68	-0.63	GSE1	-2.12	-0.92	-0.82	-0.65	-1.87859	-0.798505	-0.718753	-0.590822
TGCGAAAACAAGTACTTATGAAAC	TRCN0000489060	10.42	-1.7	-2.23	-0.94	-0.58	-0.85	-0.55	-0.48	-0.65	SIK3	-1.97	-0.76	-0.7	-0.57	-1.72859	-0.638505	-0.598753	-0.510822
TCACCCGCGCCAACGTTTCGGTAA	TRCN0000472901	10.16	-1.48	-1.76	-0.92	-0.67	-0.85	-0.49	-0.58	-0.47	PPP3CA	-1.62	-0.79	-0.67	-0.53	-1.37859	-0.668505	-0.568753	-0.470822
CAGCACAACACGTATGAATTGTCG	TRCN0000491940	10.39	-2.3	-3.3	-1.05	-0.78	-1.06	-0.55	-0.6	-0.61	ABL1	-2.8	-0.92	-0.81	-0.61	-2.55859	-0.798505	-0.708753	-0.550822
TGGGAGGTTGGTTGCGCTCGGTCT	TRCN0000477551	10.26	-2.58	-2.73	-1.11	-0.81	-1.14	-0.6	-0.74	-0.79	RHBDF1	-2.65	-0.96	-0.87	-0.77	-2.40859	-0.838505	-0.768753	-0.710822
TAGAACGACTTTGCCCCAGTTTGC	TRCN0000467335	10.04	-2.55	-2.57	-1.06	-0.5	-0.8	-0.35	-0.59	-0.63	SLC38A2	-2.56	-0.78	-0.57	-0.61	-2.31859	-0.658505	-0.468753	-0.550822
CGATTCCTAACACCTTCTAACGTC	TRCN0000489612	11.07	-2.57	-3.75	-1.17	-0.77	-1.02	-0.61	-0.94	-0.85	ABL1	-3.16	-0.97	-0.81	-0.9	-2.91859	-0.848505	-0.708753	-0.840822
TCATACGTCGTTGTAGGAGTTGAG	TRCN0000489832	9.83	-2.44	-3.67	-1.14	-1.02	-1.11	-0.69	-0.6	-0.62	ADGRB1	-3.06	-1.08	-0.9	-0.61	-2.81859	-0.958505	-0.798753	-0.550822
CACGTTCAACGGACCGGCACAGGT	TRCN0000473947	10.39	-2.8	-3.61	-1.24	-0.83	-1.14	-0.68	-0.71	-0.8	PNPLA6	-3.21	-1.04	-0.91	-0.75	-2.96859	-0.918505	-0.808753	-0.690822
CGGAATCACTATGTGAGCATTTTA	TRCN0000476551	9.38	-2.75	-3.71	-1.02	-0.71	-1	-0.63	-1.09	-0.47	TSC2	-3.23	-0.86	-0.81	-0.78	-2.98859	-0.738505	-0.708753	-0.720822
GCTCTGCAATATGTCCCCTAACAA	TRCN0000488984	11.06	-3	-4.6	-1.1	-0.8	-0.99	-0.6	-0.65	-0.52	GRM2	-3.8	-0.95	-0.8	-0.58	-3.55859	-0.828505	-0.698753	-0.520822
CAACAGTGTCCCACATATTTGTGC	TRCN0000487845	12.04	-3.02	-4.05	-1.24	-0.78	-1.06	-0.55	-0.72	-0.65	MC1R	-3.54	-1.01	-0.8	-0.68	-3.29859	-0.888505	-0.698753	-0.620822
TCACACGCACCCTCACTTTTGATT	TRCN0000476198	13.33	-3.09	-4.87	-1.21	-0.79	-1.08	-0.56	-0.64	-0.65	ZNF124	-3.98	-1	-0.82	-0.64	-3.73859	-0.878505	-0.718753	-0.580822
TCAACGTTTGTTTCGGCCGTGTCA	TRCN0000488594	13.24	-3.25	-4.9	-1.32	-0.89	-1.09	-0.63	-0.69	-0.72	NEDD9	-4.07	-1.1	-0.86	-0.71	-3.82859	-0.978505	-0.758753	-0.650822
CTAAACTTGTAGTCCTCTCTTCAA	TRCN0000472405	13.04	-3.26	-4.75	-1.25	-0.78	-1.07	-0.48	-0.61	-0.59	LOC254896	-4	-1.01	-0.78	-0.6	-3.75859	-0.888505	-0.678753	-0.540822
GGCCAGACATCGATCTACGTGTAA	TRCN0000468835	12.49	-3.08	-4.76	-1.21	-0.79	-1.17	-0.58	-0.67	-0.64	DPH5	-3.92	-1	-0.88	-0.65	-3.67859	-0.878505	-0.778753	-0.590822
